# Supplementary material for: Shortness of Breath with Daily Activities questionnaire: validation and responder thresholds in patients with chronic obstructive pulmonary disease
Source: PubMed Central journal article supplement — BMJ Open. 2013 Oct 22;3(10):e003048. doi: 10.1136/bmjopen-2013-003048 (PMC3808824; doi:10.1136/bmjopen-2013-003048), 2013-10-22
Supplement: bmjopen-2013-003048.draft_revisions.pdf [file bmjopen-2013-003048.draft_revisions.pdf]

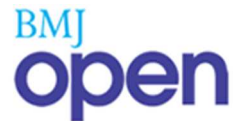

**Shortness of Breath with Daily Activities questionnaire:  
validation and responder thresholds in patients with chronic  
obstructive pulmonary disease**

|                                 |                                                                                                                                                                                                                                                                                                                                                                                                                                                                                                                                                                                                                                    |
|---------------------------------|------------------------------------------------------------------------------------------------------------------------------------------------------------------------------------------------------------------------------------------------------------------------------------------------------------------------------------------------------------------------------------------------------------------------------------------------------------------------------------------------------------------------------------------------------------------------------------------------------------------------------------|
| Journal:                        | <i>BMJ Open</i>                                                                                                                                                                                                                                                                                                                                                                                                                                                                                                                                                                                                                    |
| Manuscript ID:                  | bmjopen-2013-003048                                                                                                                                                                                                                                                                                                                                                                                                                                                                                                                                                                                                                |
| Article Type:                   | Research                                                                                                                                                                                                                                                                                                                                                                                                                                                                                                                                                                                                                           |
| Date Submitted by the Author:   | 12-Apr-2013                                                                                                                                                                                                                                                                                                                                                                                                                                                                                                                                                                                                                        |
| Complete List of Authors:       | Watkins, Michael; GlaxoSmithKline, Respiratory Medicines Development Center<br>Wilcox, Teresa; United BioSource Corporation,<br>Tabberer, Maggie; GlaxoSmithKline, Respiratory Medicines Development Centre<br>Brooks, Jean; GlaxoSmithKline, Respiratory Medicines Development Centre<br>Donohue, James; University of North Carolina, Division of Pulmonary and Critical Care Medicine<br>Anzueto, Antonio; South Texas Veterans Health Care System and University of Texas Health Science Center,<br>Chen, Wen-Hung; United BioSource Corporation,<br>Crim, Courtney; GlaxoSmithKline, Respiratory Medicines Development Center |
| <b>Primary Subject Heading</b>: | Respiratory medicine                                                                                                                                                                                                                                                                                                                                                                                                                                                                                                                                                                                                               |
| Secondary Subject Heading:      | Patient-centred medicine                                                                                                                                                                                                                                                                                                                                                                                                                                                                                                                                                                                                           |
| Keywords:                       | Chronic airways disease < THORACIC MEDICINE, THORACIC MEDICINE, RESPIRATORY MEDICINE (see Thoracic Medicine)                                                                                                                                                                                                                                                                                                                                                                                                                                                                                                                       |
|                                 |                                                                                                                                                                                                                                                                                                                                                                                                                                                                                                                                                                                                                                    |

SCHOLARONE™  
Manuscripts

1  
2  
3 **Shortness of Breath with Daily Activities questionnaire: validation and**  
4 **responder thresholds in patients with chronic obstructive pulmonary disease**  
5  
6  
7

8 **Michael L Watkins,<sup>1</sup> Teresa K Wilcox,<sup>2</sup> Maggie Tabberer,<sup>3</sup> Jean M Brooks,<sup>3</sup>**  
9  
10 **James F Donohue,<sup>4</sup> Antonio Anzueto,<sup>5</sup> Wen-Hung Chen,<sup>2</sup> Courtney Crim<sup>1</sup>**  
11

12  
13  
14 <sup>1</sup>Respiratory Medicines Development Center, GlaxoSmithKline, Research Triangle Park,  
15 North Carolina, USA

16  
17  
18 <sup>2</sup>United BioSource Corporation, Bethesda, Maryland, USA

19  
20 <sup>3</sup>Respiratory Medicines Development Centre, GlaxoSmithKline, Uxbridge, UK

21  
22 <sup>4</sup>Division of Pulmonary and Critical Care Medicine, University of North Carolina, Chapel Hill,  
23 North Carolina, USA

24  
25  
26 <sup>5</sup>South Texas Veterans Health Care System and University of Texas Health Science Center,  
27 San Antonio, Texas, USA

28  
29  
30  
31 **Word counts etc**

32  
33 Total: 3876 words (4000 recommended)

34  
35 Abstract: 298 words (300 permitted)

36  
37 Figure/tables: 1 figure, 3 tables (max of 5 recommended)

38  
39  
40 **Running header:** Validation of SOBDA questionnaire

41  
42  
43 **Correspondence to:**

44  
45 Michael Watkins, Respiratory Medicines Development Center, GlaxoSmithKline, Research  
46 Triangle Park, NC 27613, United States. E-mail: [michael.l.watkins@gsk.com](mailto:michael.l.watkins@gsk.com).

47  
48 Tel. +1 (919) 483-0449. Fax. +1 (919) 483-4300

49  
50  
51  
52  
53 **Running title:** Validation of SOBDA Questionnaire

54  
55 **Key words:** dyspnoea, breathlessness, patient-reported outcomes, COPD  
56  
57  
58  
59  
60

## ABSTRACT

**Objectives:** To test the reliability, validity and responsiveness of the 13-item Shortness of Breath with Daily Activities (SOBDA) questionnaire, and determine the threshold for response and minimal important difference (MID).

**Design:** Six-week, randomised, double-blind, placebo-controlled study.

**Setting:** Forty centres in the United States between 29 Oct 2009 and 1 July 2010.

**Primary and secondary outcome measures:** 547 patients with chronic obstructive pulmonary disease (COPD) were enrolled and 418 entered the 2-week run-in period. Data from the run-in period were collected to test internal consistency, test-retest reliability, convergent validity, and known-groups validity of the SOBDA. 366 patients were randomised 2:2:1 to fluticasone propionate/salmeterol 250/50 µg, salmeterol 50 µg, or placebo, twice daily. Results from the SOBDA questionnaire, Patient Global Assessment of Change Question, modified Medical Research Council Dyspnoea Scale (mMRC), Clinician Global Impression of Dyspnoea Severity (CGI-S), Clinician Global Impression of Change Question, and Chronic Respiratory Disease Questionnaire self-administered standardised version (CRQ-SAS) were evaluated; spirometry and safety parameters were measured. Study endpoints were selected to investigate cross-sectional and longitudinal validity of the SOBDA in relation to clinical criteria.

**Results:** Internal consistency of the SOBDA questionnaire (Cronbach alpha) was 0.89. Test-retest reliability (intraclass correlation) was 0.94. SOBDA weekly scores correlated with patient-reported and clinician-reported mMRC, CGI-S, and CRQ-SAS dyspnoea domain scores (0.29, 0.24, 0.24, -0.68, respectively). SOBDA weekly scores differentiated responders and non-responders as rated by patients and clinicians. Anchor- and supportive distribution-based analyses produced a range of potential values for the threshold for responders and MID.

1  
2  
3 **Conclusions:** The 13-item SOBDA questionnaire is reliable, valid, and responsive to  
4 change in patients with COPD. Using anchor-based methods, the proposed responder  
5 threshold is a –0.1 to –0.2 score change. A specific threshold value will be identified as more  
6 data are generated from future clinical trials.  
7  
8  
9

10  
11 **Trial registration:** NCT00984659; **GlaxoSmithKline study number:** ASQ112989  
12  
13

14  
15 **Word count of the abstract:** 298  
16  
17  
18  
19  
20  
21  
22  
23  
24  
25  
26  
27  
28  
29  
30  
31  
32  
33  
34  
35  
36  
37  
38  
39  
40  
41  
42  
43  
44  
45  
46  
47  
48  
49  
50  
51  
52  
53  
54  
55  
56  
57  
58  
59  
60

## ARTICLE SUMMARY

### Article focus

- Dyspnoea, often referred to as 'shortness of breath' or 'breathlessness', is commonly associated with decreases in functional status, quality of life, and other disabilities.
- The patient-reported outcome questionnaire was developed to specifically assess Shortness of Breath with Daily Activities (SOBDA) in patients with chronic obstructive pulmonary disease (COPD).
- An initial non-interventional study (A2-4398-003)<sup>1</sup> showed internal consistency and test-retest reliability. The current study (NCT00984659; ASQ112989) was conducted to reconfirm the reliability, validity, and responsiveness of the 13-item SOBDA questionnaire and to determine the threshold for response and the minimal important difference of the final questionnaire.

### Key messages

- The current study demonstrates that the 13-item SOBDA questionnaire is reliable, valid, and responsive to change in patients with COPD. The proposed responder threshold is a  $-0.1$  to  $-0.2$  score change with a specific threshold value to be determined as more data are generated from future clinical trials.

### Strengths and limitations of the study

- This study reconfirmed the initial psychometric validation observed in the non-interventional study (A2-4398-003).<sup>1</sup>
- Only patients with modified Medical Research Council Dyspnoea Scale  $\geq 2$  were included in the patient population, thereby restricting the shortness of breath severity range. Approximately half of the patients also did not answer the last Patient Global

1  
2  
3  
4  
5  
6  
7  
8  
9  
10  
11  
12  
13  
14  
15  
16  
17  
18  
19  
20  
21  
22  
23  
24  
25  
26  
27  
28  
29  
30  
31  
32  
33  
34  
35  
36  
37  
38  
39  
40  
41  
42  
43  
44  
45  
46  
47  
48  
49  
50  
51  
52  
53  
54  
55  
56  
57  
58  
59  
60

Assessment of Change question. These limitations may have affected some of the validity assessments.

For peer review only

## INTRODUCTION

Dyspnoea, sometimes referred to as 'shortness of breath' or 'breathlessness' by the patient, is a common and significant complaint of patients with chronic obstructive pulmonary disease (COPD). In one survey of 3,000 COPD patients, 56% were found to have breathlessness during normal physical activities and 42% reported breathlessness while doing household chores.<sup>2</sup>

Capturing the effect of a treatment intervention on dyspnoea from the patient's perspective is therefore an important objective in order to demonstrate treatment effectiveness. While patient-reported aspects of COPD have been assessed using currently available instruments, most do not adequately address the concept of dyspnoea in patients with COPD for use in clinical trials, due to limited assessment of psychometric properties during development of the questionnaire or inconsistent clinical validity in use. In addition, there are no currently available instruments for assessing COPD-related dyspnoea that can support a specific label claim for a medicinal product in the United States.

The Shortness of Breath with Daily Activities (SOBDA) questionnaire is a daily diary questionnaire developed to quantify a patient's perception of dyspnoea related to daily activities and how this changes over time during treatment.<sup>1,3</sup> Development of the SOBDA questionnaire followed the Patient-Reported Outcomes Guidance for drug development issued by the US Food and Drug Administration<sup>4</sup> and included the creation of an endpoint rationale and the development of a conceptual framework.<sup>3</sup> Qualitative research, including individual interviews and patient focus groups, was used to develop potential questions (item pool), item format and response options, which were subject to clinical and translation expert review. Further cognitive interviews with patients were conducted to test content validity.<sup>3</sup> The item pool was tested in a non-interventional study, and the number of items was appropriately reduced to produce the final SOBDA questionnaire.<sup>1</sup> Initial psychometric

1  
2  
3 validation from this non-interventional study showed excellent internal consistency and test-  
4  
5 retest reliability.<sup>1</sup>  
6  
7

8 The objectives of this study were to (i) confirm the reliability and validity, (ii) evaluate the  
9  
10 responsiveness, (iii) define the threshold for responder and also the minimal important  
11  
12 difference (MID) of the final SOBDA questionnaire in patients with COPD. The threshold for  
13  
14 response was established by comparing SOBDA change scores for responders and non-  
15  
16 responders, defined according to a range of established patient- and clinician-completed  
17  
18 assessments. The study included active treatments to ensure some patients would be  
19  
20 classified as 'responders' on the established clinical measures.  
21  
22

## 23 **METHODS**

### 24 **Patients**

25  
26  
27 Male and female patients  $\geq 40$  years of age with an established clinical history of COPD in  
28  
29 accordance with the American Thoracic Society/European Respiratory Society definitions<sup>5</sup>  
30  
31 were recruited. At screening, patients were required to have a post-salbutamol forced  
32  
33 expiratory volume in one second ( $FEV_{1}$ )  $\leq 70\%$  of predicted normal and  $FEV_{1}$  /forced vital  
34  
35 capacity (FVC) ratio of  $< 0.70$ ; to be a current or former smoker with a history of at least 10  
36  
37 pack-years; and to demonstrate evidence of dyspnoea as assessed by a patient-reported  
38  
39 modified Medical Research Council Dyspnoea Scale (mMRC) score  $\geq 2$ . The study protocol  
40  
41 was institutional review board-approved and all patients provided written informed consent  
42  
43 before enrolment.  
44  
45  
46  
47  
48

### 49 **Study design**

50  
51  
52 This randomised, double-blind, placebo-controlled study was conducted at 40 centres in the  
53  
54 USA from 29 Oct 2009 to 01 July 2010 (Trial registration: NCT00984659; GlaxoSmithKline  
55  
56 study number: ASQ112989). Patients attended three clinic visits. At screening visit 1, eligible  
57  
58  
59  
60



1  
2  
3 patients entered a 2-week run-in period during which short-acting bronchodilator rescue  
4 medications (salbutamol and/or ipratropium) were permitted. At visit 2, eligible patients were  
5 randomised (2:2:1) to receive fluticasone propionate/salmeterol combination (FSC)  
6  
7 250/50 µg, salmeterol (SAL) 50 µg or placebo, all administered twice daily via a DISKUS®  
8  
9 inhaler, for 6 weeks. The final dose of study medication was taken on the day before visit 3  
10  
11 (week 6). In the event of a patient not completing the week 6 visit, attempts were made for  
12  
13 the patient to attend an early withdrawal visit that included the week 6 assessments.  
14  
15

16  
17  
18 All non-COPD medications, including pre-existing selective beta-blocker therapy, could be  
19  
20 continued if their dose remained constant. Concurrent use of inhaled or oral corticosteroids,  
21  
22 long-term oxygen therapy, long-acting bronchodilators, and theophylline were exclusion  
23  
24 criteria within the study protocol.  
25

## 26 27 **Measurements and assessments**

28  
29  
30 Patient-completed measures: SOBDA questionnaire

31  
32  
33 The 13-item SOBDA questionnaire (box 1) was completed on an electronic diary (e-diary)  
34  
35 each evening immediately before bedtime, which allowed the patient to reflect on and  
36  
37 capture the current day's activities.<sup>13</sup> All items followed the same format: 'How breathless  
38  
39 were you when [completing the specified activity]?' Individual item responses are completed  
40  
41 on a scale from 'not at all' to 'so short of breath I did not do the activity'. Items 1–4, 6, 8, 9,  
42  
43 11, and 12 are scored from 1 ('not at all'), 2 ('slightly'), 3 ('moderately'), to 4 ('severely' or 'so  
44  
45 severely that I did not do the activity today'), and items 5, 7, 10, and 13 are scored from 1  
46  
47 ('not at all' and 'slightly'), 3 ('moderately'), and 4 ('severely' or 'so severely that I did not do  
48  
49 the activity today'). Patients were also given an option of 'did not do' for activities they did not  
50  
51 perform for other reasons. In scoring the questionnaire, these responses were regarded as  
52  
53 missing data. Due to the design of the e-diary, it was not possible for patients to skip  
54  
55 individual questions within the diary although a full day of data could be missed if the patient  
56  
57 did not access the diary within the time window allowed.  
58  
59  
60

Analyses were conducted aggregating daily data over weekly time periods to account for day-to-day variability and the fact that not all activities were performed every day. A daily SOBDA score was computed across the 13 items as a mean score ranging from 1 to 4, if at least 7 items had non-missing scores. A weekly mean SOBDA score was then computed as the mean of the daily mean scores in a 7-day period, if at least 4 out of 7 days had non-missing SOBDA daily scores. The baseline SOBDA weekly score for each patient was calculated as the mean value during the week before randomisation.

#### Patient-completed measures: other

Additional questions were completed via e-diary, daily or weekly. Daily questions included any form of contact with healthcare professionals, frequency of rescue medication use, and completion of a Global Assessment of Shortness of Breath question: 'Overall, were you short of breath during your activities today?' Patients responded to this question on a 5-point scale from '1=not at all' to '5=extremely'. Every 7 days, patients responded to a Patient Global Assessment of Change (PGAC) question that asked, 'Compared to last week (7 days ago), how was your shortness of breath today?' on a scale of '1=much worse' to '5=much better', with 3='no change'.

Patients completed the mMRC at each clinic visit and the 20-item Chronic Respiratory Disease Questionnaire self-administered standardised version (CRQ-SAS) at visit 2 and week 6/early withdrawal.

#### Clinician-completed assessments

A Clinician Global Impression of Dyspnoea Severity (CGI-S) question to assess dyspnoea severity on a scale of 1 (mild) to 4 (very severe) was completed at visit 2 and week 6/early withdrawal. A Clinician Global Impression of Change (CGI-C) question to assess change in dyspnoea on a scale of 1 (much worse) to 5 (much better), with 3 being no change, was

1  
2  
3 completed at week 6/early withdrawal. Clinicians rated the patient's dyspnoea on the 5-point  
4 mMRC scale at each clinic visit.  
5  
6

## 7 8 Spirometry 9

10  
11 Spirometry (FEV<sub>1</sub> and FVC) was performed at all clinic visits after the questionnaires were  
12 completed. FEV<sub>1</sub> responders were defined as patients who had a change of ≥100 ml from  
13 visit 2 to week 6/early withdrawal, whereas FEV<sub>1</sub> non-responders were those patients with a  
14 change of <100 ml. Bronchodilator reversibility testing was also performed 30 min post-  
15 salbutamol (360 µg) at screening. Predicted FEV<sub>1</sub> values were calculated according to  
16 National Health and Nutrition Examination Survey III reference values.<sup>6</sup>  
17  
18  
19  
20  
21  
22

## 23 24 Safety 25

26  
27 Safety was assessed by reported adverse events (AEs) and COPD exacerbations.  
28  
29

## 30 31 **Statistical analyses** 32

### 33 34 Sample size and powering 35

36  
37 Sample size calculations were based on evaluation of the responsiveness of the SOBDA  
38 questionnaire<sup>1,3</sup> and allowed for comparison of SOBDA change scores for responders and  
39 non-responders. Calculations assumed 90% power, a two-sided 5% significance level, and a  
40 standardised between-groups effect size of 0.5 (defined as the difference between  
41 responders and non-responders divided by the standard deviation of the difference). The  
42 sample size was increased to allow exploratory comparisons of SOBDA scores between  
43 treatment arms. Assuming 90% of randomised patients would provide sufficient data for this  
44 comparison and a randomisation ratio of 2:2:1, approximately 350 patients were planned for  
45 randomisation in order to provide 320 evaluable patients.  
46  
47  
48  
49  
50  
51  
52  
53  
54  
55  
56  
57  
58  
59  
60

Analyses for the internal consistency, test-retest reliability in a stable population, convergent validity, and known-groups validity were based upon the data collected from the run-in population. This population consisted of randomised and non-randomised patients who completed visit 2. The responsiveness to change of the SOBDA was based on data collected from the modified intent-to-treat (mITT) population, defined as all patients who were randomised to treatment and who received at least one dose of study drug, and analyzed according to the treatment actually received if this was different from the randomised treatment assignment.

### Internal consistency

To confirm the reliability and validity of the SOBDA questionnaire,<sup>1</sup> the internal consistency of the instrument was assessed and summary scores were compared with other endpoints collected.

The internal consistency of the SOBDA score was assessed for patients with a non-missing score for each item at day 1 of the run-in period by using Cronbach's formula for coefficient alpha (scale from 0 to 1.0); a value of 0.70 or greater is recognised as indicating acceptable internal consistency for an instrument.<sup>7</sup> Pearson's correlation and Intraclass correlation coefficient (ICC) were used to evaluate test-retest reliability, comparing SOBDA weekly scores for patients who reported no change on their weekly PGAC assessment during weeks 1 and 2 of the run-in period.

SOBDA weekly scores were compared with other relevant study measures to establish the convergent and known-groups validity of the instrument. Convergent validity was assessed by examining the Spearman rank order correlation coefficient between baseline SOBDA weekly score and both mMRC (patient and clinician) ratings and CGI-S ratings at visit 2. The Pearson's correlation coefficient between the baseline SOBDA weekly scores and the CRQ-SAS dyspnoea domain score at visit 2 were also assessed. Known-groups validity, demonstrating that groups of patients who are known to be different report different SOBDA

1  
2  
3 scores, was assessed by comparisons of SOBDA weekly scores between groups of patients  
4 based on mMRC (patient and clinician) ratings and CGI-S ratings collected at visit 2 using  
5 analysis of covariance (ANCOVA) models adjusted for age, gender, and FEV<sub>1</sub> % predicted  
6 measured during the screening visit.  
7  
8  
9

#### 10 11 12 Threshold for responsiveness and MID 13

14  
15 Responsiveness of the SOBDA was evaluated using the differences in weekly change score  
16 between PGAC responders and non-responders as anchors, as well as comparisons of the  
17 changes in SOBDA weekly scores from baseline to the last week of treatment for PGAC,  
18 CGI-C, CRQ-SAS dyspnoea domain, and patient- and clinician-reported mMRC responders  
19 and non-responders, using ANCOVA adjusted for age, gender and baseline SOBDA weekly  
20 score. Cumulative distribution plots based on these anchors were also used to determine the  
21 MID.  
22  
23  
24  
25  
26  
27  
28  
29

30 Post-hoc supportive analyses using distribution-based approaches were also conducted  
31 after completion of the *a priori* specified anchor-based analyses to further supplement  
32 estimation of a responder threshold.  
33  
34  
35  
36

37 Responders by PGAC were defined as patients with a rating of 'better' or 'much better', and  
38 non-responders were defined as patients with a response of 'much worse,' 'worse' or 'no  
39 change', on their respective scales. Responders by CGI-C were defined as patients with a  
40 rating of 'better' or 'much better', and non-responders were defined as patients with a  
41 response of 'much worse,' 'worse' or 'no change'. A CRQ-SAS dyspnoea domain responder  
42 was defined as a patient with a score increase of 0.5 units or more between visit 2 and week  
43 6/early withdrawal, and a non-responder was defined as a patient who had a decrease in  
44 score, or an increase of less than 0.5 units. A responder by mMRC was defined as a patient  
45 who had a score decrease of 1 unit or more between visit 2 and week 6/early withdrawal,  
46 and a non-responder was defined as a patient who had the same score or an increase in  
47 score.  
48  
49  
50  
51  
52  
53  
54  
55  
56  
57  
58  
59  
60

## RESULTS

A total of 547 patients were screened and 418 completed both week -2 (screening visit 1) and week 0 (randomisation, visit 2) assessments; 52 patients were not eligible for randomisation. 366 patients met inclusion criteria and were randomised; however, one patient refused to take study medication, thus 365 patients received treatment and were included in the mITT (figure 1). Patients were predominantly white (90%), male (57%) with a mean age of 61.1 years (standard deviation, 9.7 years) and a mean body mass index of 28.3 kg/m<sup>2</sup> (table 1). The majority (62%) of patients were current smokers with an extensive smoking history (mean pack-years, 54.9). The mean post-salbutamol % predicted FEV<sub>1</sub> was 49.9%, indicative of a population with severe airflow obstruction.

A total of 29 patients withdrew from the study (FSC 9%; SAL 7%; placebo 8%), 13 because of an AE (FSC 5%; SAL 2%; placebo 4%).

### Reliability and validity

#### Internal consistency

Cronbach's alpha value for the SOBDA was 0.89 (n=344). Test-retest reliability was assessed between weeks 1 and 2 of the run-in period for the 152 patients reporting no change on the second weekly PGAC assessment: Pearson's correlation coefficients and ICC were both 0.94, with a mean difference between weeks 1 and 2 of 0.01 on the 4-point SOBDA scale.

#### Convergent validity

The relationship of SOBDA weekly scores to patient-reported and clinical assessments of dyspnoea severity or constructs hypothetically related to dyspnoea severity was examined to assess convergent validity. Spearman rank-order correlations between baseline SOBDA weekly scores and mMRC scores were 0.29 (patient-reported) and 0.24 (clinician-reported),

1  
2  
3 and was 0.24 for CGI-S. Pearson's correlation between baseline SOBDA weekly scores and  
4 the CRQ-SAS dyspnoea domain score was  $-0.68$  (higher scores in CRQ-SAS, contrary to  
5 SOBDA, indicate less dyspnoea, hence the correlation is negative).  
6  
7  
8  
9

### 10 Known-groups validity

11  
12 Known-groups validity was evaluated by determining the extent to which baseline SOBDA  
13 weekly scores differentiated between patients with varying levels of dyspnoea severity as  
14 rated on the patient- and clinician-reported mMRC and CGI-S collected at visit 2. Least-  
15 squares mean SOBDA weekly scores were increased as CGI-S and mMRC clinician/patient  
16 ratings increased (table 2).  
17  
18  
19  
20  
21  
22  
23

### 24 Responsiveness

25  
26  
27 SOBDA weekly scores were lower in PGAC responders than in non-responders, indicating  
28 less dyspnoea with daily activities. Differences between SOBDA weekly change scores for  
29 PGAC responders and non-responders were statistically significant for each weekly  
30 comparison with the exception of week 6 (table 3a).  
31  
32  
33  
34  
35

36  
37 Changes in SOBDA weekly score between baseline and the last treatment week were  
38 statistically significantly larger for CGI-C and CRQ-SAS dyspnoea domain responders than  
39 for non-responders ( $p < 0.001$ ). This was not seen with the patient- or clinician-completed  
40 mMRC or PGAC defined responders, although changes in last treatment week SOBDA  
41 scores were numerically larger for responders versus non-responders (table 3b).  
42  
43  
44  
45  
46  
47

### 48 Threshold for SOBDA responders and MID

49  
50  
51 Patients classified as 'better' based on the CGI-C, CRQ-SAS dyspnoea domain (change of  
52  $>0$  to 0.5 units), or FEV<sub>1</sub> (change of  $>50$  to  $<100$  ml) had a mean change in SOBDA score of  
53  $-0.25$ ,  $-0.13$ , or  $-0.16$ , respectively, at the last treatment week compared with baseline.  
54  
55  
56

57 Patients who rated their dyspnoea as 'better' on the PGAC assessments had a mean  
58  
59  
60

1  
2  
3 change in SOBDA score of -0.26 at week 1, -0.08 at weeks 2, 3 and 5, -0.10 at week 4,  
4  
5 and -0.05 at week 6.  
6  
7

## 8 **Exploratory efficacy analyses**

### 9 10 SOBDA treatment group differences

11  
12  
13  
14 After adjusting for age, sex, and SOBDA baseline score, the difference between FSC and  
15  
16 placebo was -0.09 (95% confidence interval [CI]: -0.23, 0.05) and between SAL and  
17  
18 placebo was 0.03 (95% CI: -0.11, 0.16).  
19  
20

### 21 CRQ-SAS

22  
23  
24 The greatest mean changes for dyspnoea and fatigue were observed in the FSC group (0.4  
25  
26 and 0.3, respectively). The mean changes from baseline in emotional function were similar  
27  
28 between placebo and the two treatment groups (0.2 and 0.1), as were those for mastery (0.2  
29  
30 for placebo, 0.3 for SAL, and 0.4 for FSC). SAL and FSC groups reported a change of  
31  
32 'better' or 'much better' (56% and 65%, respectively) compared with the placebo group  
33  
34 (53%). Thirty-four percent of patients receiving placebo were rated as responders, whereas  
35  
36 37% of SAL patients and 46% of FSC patients were responders.  
37  
38

### 39 Spirometry

40  
41  
42  
43 The mean change in FEV<sub>1</sub> in the placebo, SAL, and FSC groups were 1 ml, 61 ml, and  
44  
45 138 ml, respectively. Forty-nine percent of patients receiving FSC were considered  
46  
47 responders, while 38% of patients receiving SAL and 25% of patients receiving placebo  
48  
49 were responders. The majority of patients in the FSC (62%) and SAL (55%) groups reported  
50  
51 a change of 'better' or 'much better', and less than half of patients in the placebo group  
52  
53 (38%) reported this change.  
54  
55  
56  
57  
58  
59  
60



## Safety

AEs were reported for 37 patients (27%) in the FSC group, 34 patients (23%) in the SAL group, and 14 patients (19%) in the placebo group. COPD exacerbation, dyspnoea, headache, and respiratory tract infection were the most commonly reported AEs with no other individual AEs occurring in  $\geq 3\%$  of patients in any group.

Twelve patients experienced serious AEs (SAEs) (FSC, 3 [2%] patients; SAL, 5 [3%] patients; placebo, 4 [5%] patients); three of these SAEs were considered possibly related to study medication (SAL, 1 patient; placebo, 2 patients). One fatal SAE of respiratory failure occurred for a patient receiving FSC during the study, but was not considered related to FSC treatment by the study investigator.

## DISCUSSION

The SOBDA was developed to address the need for a robust and psychometrically sound patient-reported outcomes questionnaire for use in clinical research that would specifically capture dyspnoea experienced with daily activities as perceived by patients with COPD. Available questionnaires have limited assessment of psychometric properties, inconsistent clinical validity, and/or are not dyspnoea-specific. The CRQ-SAS<sup>8 10</sup> and SGRQ<sup>11 12</sup> questionnaires, for example, measure multiple dimensions that are much broader than dyspnoea with activity, which is the specific aim of the current SOBDA questionnaire. The mMRC questionnaire has been used to discriminate between levels of dyspnoea associated with exercise, but shows very limited response to change in clinical trials due to the limited number of categories for response.

This study confirms that the SOBDA questionnaire has sound psychometric properties. SOBDA weekly scores had an internal consistency reliability Cronbach's alpha value of 0.89, which surpassed the established threshold goal of  $>0.7$ .<sup>7</sup> SOBDA also had good test-retest

1  
2  
3 reliability (ICC=0.94), exceeding the threshold goal of >0.60, in patients reporting no change  
4 in their breathlessness as measured by the PGAC.<sup>13</sup>  
5  
6

7  
8 The convergent validity assessed through Spearman rank order correlations was  
9  
10 reasonable, although lower than expected for the CGI-C and mMRC. This may have been  
11 due to the narrow range of responses given by clinicians: most patients were rated as '2' or  
12 '3' by clinicians on both scales. The narrow range of clinician mMRC ratings reflect the  
13 inclusion criteria requiring patients to have an mMRC  $\geq 2$  at study entry. The CRQ-SAS  
14 dyspnoea scale, which measures the concept most similar to the SOBDA, showed the  
15 highest correlation with the SOBDA questionnaire and is supportive of the SOBDA's  
16 construct validity.  
17  
18  
19  
20  
21  
22  
23

24  
25 SOBDA weekly scores in the study population demonstrated good known-groups validity  
26 through a series of analyses. The scores differentiated between dyspnoea severity as rated  
27 by both clinicians and patients. As expected, discrimination based on patient ratings was  
28 better than that based on clinician ratings. Known-groups validity was also confirmed when  
29 comparing the SOBDA with the CGI-S.  
30  
31  
32  
33  
34  
35

36 Assessment of responsiveness of the SOBDA questionnaire was conducted independent of  
37 treatment allocation. Good separation in SOBDA weekly scores was observed between the  
38 PGAC groups at day 8 as indicated by significant differences between scores for responders  
39 and non-responders. Less separation was observed between PGAC groups throughout the  
40 later weeks of the 6-week treatment period compared with week 1. This is not an  
41 unexpected trend as any improvement in dyspnoea would be expected to occur or be  
42 perceptible to patients soon after initiating therapy, with continued improvement being less  
43 noticeable over time. The particularly diminished responsiveness observed at week 6 was  
44 potentially due to approximately half of the patients not providing a response to the PGAC at  
45 day 43 or at the last visit. Changes from baseline in SOBDA last treatment week scores  
46 were statistically significant between responders and non-responders using the CGI-C and  
47  
48  
49  
50  
51  
52  
53  
54  
55  
56  
57  
58  
59  
60

1  
2  
3 CRQ-SAS dyspnoea domain, but not the mMRC. This again may be due to the narrow range  
4  
5 of mMRC ratings.  
6

7  
8 The thresholds for SOBDA responders and the MID were explored using anchor- and  
9  
10 distribution-based methods. Anchor-based methods were used to establish a preliminary  
11  
12 MID range for SOBDA mean score changes within a patient, which would also be  
13  
14 considered as the threshold for SOBDA responders to allow comparison of proportions of  
15  
16 responders in different categories (e.g. different interventions or treatments). The evaluation  
17  
18 of data around the MID was based on the change from baseline in the SOBDA score for  
19  
20 those patients who endorsed or had the clinician endorse for them (depending on the  
21  
22 anchor), the response category 'better' for the global assessments or the pre-specified  
23  
24 grouping of meaningful improvement on other measures (PGAC, CGI-C, CRQ-SAS, and  
25  
26 FEV<sub>1</sub>). Based on these anchors, a preliminary response threshold for the SOBDA  
27  
28 questionnaire is a -0.1 to -0.2 score change. This is further supported by distribution-based  
29  
30 estimations of the MID. Similar thresholds of -0.14 and -0.21 were calculated using 0.2 and  
31  
32 0.3 times the standard deviation of the SOBDA scores at baseline, a method described by  
33  
34 Revicki and associates.<sup>14</sup> In addition, a similar threshold of -0.17 was identified by the  
35  
36 standard error of measurements method.<sup>15</sup> Thus, a threshold of -0.1 to -0.2 for the score  
37  
38 range of 1 to 4, supported by both anchor- and distribution-based methods, seems  
39  
40 reasonable at this stage of questionnaire development. This MID estimation is consistent in  
41  
42 scale with that of the CRQ-SAS in which the MID is 0.5 on a 7-point Likert scale.<sup>16</sup>  
43  
44

45  
46 Once an estimation of the MID was determined, exploratory analysis by treatment group was  
47  
48 conducted which suggests that the proportion of patients crossing the -0.1 and -0.2  
49  
50 thresholds was numerically greater for the SAL group compared with placebo, and  
51  
52 numerically greater for the FSC group compared with the SAL group. As the study was  
53  
54 designed only to validate the SOBDA, and cannot reliably demonstrate differences between  
55  
56 treatment groups, these changes from baseline in SOBDA weekly score at last treatment  
57  
58 can only be regarded as exploratory. Even after adjusting for age, gender, and baseline  
59  
60

1  
2  
3 SOBDA weekly score, each treatment group when compared with placebo did not meet the  
4  
5 MID of  $-0.1$  or  $-0.2$ .  
6

7  
8 This study had some limitations. Only patients with mMRC  $\geq 2$  were included in the study,  
9  
10 which restricted the ranges of the dyspnoea severity. The effects of exacerbation and  
11  
12 possible cultural differences on the study results were not evaluated. Finally, approximately  
13  
14 half of the patients did not answer the last PGAC question. These limitations could have had  
15  
16 effect on some of the results of our study, although we do not feel that there would be any  
17  
18 change to the overall conclusions.  
19

20  
21 In summary, this study demonstrates that the 13-item SOBDA questionnaire is reliable, valid,  
22  
23 and responsive to change in patients with COPD. At this stage of questionnaire  
24  
25 development, a change score of  $-0.1$  to  $-0.2$  is the most appropriate estimation for  
26  
27 determining a threshold for treatment response. A specific value will be identified as more  
28  
29 data is generated from future clinical trials.  
30

## 31 32 **ACKNOWLEDGEMENTS**

33  
34  
35 Editorial support in the form of copyediting, editorial suggestions to draft versions of this  
36  
37 paper, assembling tables and figures, collating author comments, fact checking, referencing,  
38  
39 and graphic services was provided by Tara N Miller, PhD (Lyndhurst, NJ, USA), David  
40  
41 Cutler, PhD and Lisa Moore, PhD (Macclesfield, UK) at Gardiner-Caldwell Communications.  
42  
43 This support was funded by GlaxoSmithKline.  
44  
45

## 46 47 **CONTRIBUTORS**

48  
49 All authors contributed to drafting the article or revising it critically for important intellectual  
50  
51 content, and all approved the final version to be published. MLW, TKW, MT, JMB and CC  
52  
53 contributed to conception and design of the study, acquisition of data and analysis and  
54  
55 interpretation of data. JFD, AA and W-HC contributed to acquisition of data and analysis and  
56  
57 interpretation of data. MLW attests that the authors had access to all the study data, takes  
58  
59  
60

1  
2  
3 responsibility for the accuracy of the analysis, and had authority over manuscript preparation  
4  
5 and the decision to submit the manuscript for publication.  
6

## 7 8 COMPETING INTERESTS

9  
10 **Michael L Watkins, Maggie Tabberer, Jean M Brooks, and Courtney Crim** are  
11  
12 employees of, and own stock in, GlaxoSmithKline. **Teresa K Wilcox** and **Wen-Hung Chen**  
13  
14 are employees of the United BioSource Corporation. Funding to conduct the study, data  
15  
16 analysis and interpretation, and generation of the study report was provided to United  
17  
18 BioSource Corporation by GlaxoSmithKline. **James F Donohue** has served as consultant to  
19  
20 Almirall, AstraZeneca, Boehringer Ingelheim, Dey, Elevation Pharmaceuticals, Forest  
21  
22 Laboratories, GlaxoSmithKline, Novartis, Pearl Pharmaceuticals, Pfizer and Sunovion; and  
23  
24 has received research grants from Boehringer Ingelheim, GlaxoSmithKline and Novartis.  
25

26  
27 **Antonio Anzueto** is an advisor, consultant, and speaker for Boehringer Ingelheim,  
28  
29 GlaxoSmithKline, Pfizer, Merck, Bayer-Schering Pharma, Dey Pharma, Forest Laboratories  
30  
31 and has investigational grants with the US National Heart, Lung, and Blood Institute,  
32  
33 GlaxoSmithKline, Lilly, Pfizer, and Pneuma Pharmaceuticals.  
34

## 35 36 FUNDING

37  
38 The SOBDA development programme, including this ASQ112989 study, was funded by  
39  
40 GlaxoSmithKline. GlaxoSmithKline and United BioSource Corporation developed the  
41  
42 instrument. GlaxoSmithKline had a role in study design, data collection and analyses,  
43  
44 decision to publish, and preparation of all study reporting including this manuscript.  
45  
46

## 47 48 DATA SHARING

49 No unpublished data are available  
50  
51  
52  
53  
54  
55  
56  
57  
58  
59  
60

## REFERENCES

1. Wilcox TK, Chen W-H, Howard KA, et al. Item selection, reliability and validity of the Shortness of Breath with Daily Activities (SOBDA) questionnaire: a new outcome measure for evaluating dyspnoea in COPD. (Submitted 2013).
2. Rennard S, Decramer M, Calverley PM, et al. Impact of COPD in North America and Europe in 2000: subjects' perspective of Confronting COPD International Survey. *Eur Respir J* 2002;**20**:799–805.
3. Howard K, Berry P, Petrillo J, et al. Development of the shortness of breath with daily activities questionnaire (SOBDA). *Value in Health* 2012;**15**:1042–50.
4. Food and Drug Administration. Guidance for industry on patient-reported outcome measures: use in medical product development to support labeling claims. 2009. <http://www.fda.gov/downloads/Drugs/Guidances/UCM193282.pdf> (accessed 4 Apr 2013).
5. Celli BR, MacNee W, ATS/ERS Task Force. Standards for the diagnosis and treatment of patients with COPD: a summary of the ATS/ERS position paper. *Eur Respir J* 2004;**23**:932–46.
6. Hankinson JL, Odencrantz JR, Fedan KB. Spirometric reference values from a sample of the general US population. *Am J Resp Crit Care Med* 1999;**159**:179–87.
7. Nunnally JC, Bernstein IH. *Psychometric Theory*. 3rd ed. New York: McGraw-Hill, Inc.; 1994.
8. Aaron SD, Vandemheen KL, Clinch JJ, et al. Measurement of short-term changes in dyspnoea and disease-specific quality of life following an acute COPD exacerbation. *Chest* 2002;**121**:688–96.

- 1  
2  
3 9. Aaron SD, Vandemheen KL, Hebert P, et al. Outpatient oral prednisone after  
4 emergency treatment of chronic obstructive pulmonary disease. *N Engl J Med*  
5 2003;**348**:2618–25.  
6  
7  
8
- 9  
10 10. Parker CM, Voduc N, Aaron SD, et al. Physiological changes during symptom  
11 recovery from moderate exacerbations of COPD. *Eur Respir J* 2005;**26**:420–8.  
12  
13
- 14 11. Jones PW, Quirk FH, Baveystock CM. The St George's Respiratory Questionnaire.  
15 *Respir Med* 1991;**85**(Suppl. B):2531.  
16  
17  
18
- 19 12. Jones PW, Quirk FH, Baveystock CM, et al. A self-complete measure of health status  
20 for chronic airflow limitation. The St George's Respiratory Questionnaire. *Ann Rev*  
21 *Respir Dis* 1992;**145**:1321–7.  
22  
23  
24  
25  
26
- 27 13. Hays R, Anderson R, Revicki DA. Assessing reliability and validity of measurement in  
28 clinical trials. In: Staquet MJ, Hays RD, Fayers PM, eds. *Quality of life assessment in*  
29 *clinical trials*. New York, NY: Oxford University Press, 1998.167–182.  
30  
31  
32  
33
- 34 14. Revicki DA, Cella D, Hays RD, et al. Responsiveness and minimal important  
35 differences for patient reported outcomes. *Health Qual Life Outcomes* 2006;**4**:70.  
36  
37  
38
- 39 15. Wyrwich K, Tierney W, Wolinsky F. Further evidence supporting a SEM-based  
40 criterion for identifying meaningful intra-individual changes in health-related quality of  
41 life. *J Clin Epidemiol* 1999;**52**:861–73.  
42  
43  
44  
45
- 46 16. Schunemann HJ, Puhan M, Goldstein R, et al. Measurement properties and  
47 interpretability of the chronic respiratory disease questionnaire (CRQ). *COPD*  
48 2005;**2**:81–9.  
49  
50  
51  
52  
53  
54  
55  
56  
57  
58  
59  
60

## TABLES AND FIGURES

Table 1. Demographic and clinical characteristics

|                                                            | Not Randomised | Placebo     | FSC 250/50 µg | SAL 50 µg   | Total       |
|------------------------------------------------------------|----------------|-------------|---------------|-------------|-------------|
| N                                                          | 52             | 75          | 139           | 152         | 418         |
| Age, year (mean [SD])                                      | 63.8 (9.6)     | 62.8 (9.8)  | 60.2 (9.5)    | 60.1 (9.6)  | 61.1 (9.7)  |
| Male, n (%)                                                | 25 (48)        | 46 (61)     | 79 (57)       | 89 (59)     | 239 (57)    |
| White, n (%)                                               | 44 (85)        | 65 (87)     | 127 (91)      | 140 (92)    | 376 (90)    |
| Current smoker, n (%)                                      | 29 (57)        | 46 (61)     | 84 (60)       | 99 (65)     | 258 (62)    |
| Body mass index, mean (SD)                                 | 28.3 (6.9)     | 26.6 (6.1)  | 29.0 (7.3)    | 28.5 (6.2)  | 28.3 (6.7)  |
| Post-bronchodilator FEV <sub>1</sub> % predicted mean (SD) | 50.3 (15.1)    | 49.4 (13.1) | 49.5 (13.7)   | 50.2 (13.8) | 49.9 (13.8) |
| FEV <sub>1</sub> /FVC % (mean [SD])                        | 55.7 (35.2)    | 51.6 (11.4) | 53.7 (11.4)   | 52.2 (10.9) | 53.0 (16.1) |
| % Reversibility (mean [SD])                                | 8.6 (14.4)     | 16.7 (19.2) | 14.5 (18.5)   | 11.7 (13.9) | 13.1 (16.8) |

NOTE: 'Not randomised' column reflects those patients who completed visit 1 and 2 assessments but were not eligible to be randomised.

'Total' column reflects the run-in population, defined as patients who completed visits 1 and 2 including those who were not randomised.

FEV<sub>1</sub>, forced expiratory volume in 1 s; FSC, fluticasone propionate/salmeterol combination; FVC, forced vital capacity; SAL = salmeterol;

SD, standard deviation.



**Table 2.** Known groups validity: least-squares mean baseline SOBDA weekly score by mMRC and CGI-S response categories at visit 2

| Response categories | Patient-completed mMRC<br>n, LS mean (SE) | Clinician-completed mMRC<br>n, LS mean (SE) | CGI-S<br>n, LS mean (SE) |
|---------------------|-------------------------------------------|---------------------------------------------|--------------------------|
| 0                   | n=12<br>1.92 (0.19)                       | --                                          | --                       |
| 0–1                 | --                                        | n=12<br>1.78 (0.20)                         | --                       |
| 1                   | n=103<br>1.94 (0.07)                      | --                                          | n=19<br>1.87 (0.16)      |
| 2                   | n=138<br>2.20 (0.06)                      | n=200<br>2.08 (0.05)                        | n=236<br>2.11 (0.05)     |
| 3                   | n=65<br>2.26 (0.08)                       | n=117<br>2.28 (0.06)                        | n=78<br>2.33 (0.08)      |
| 4                   | n=22<br>2.73 (0.14)                       | n=10<br>2.73 (0.22)                         | n=5<br>2.72 (0.31)       |

NOTE: Due to the small number of 0 and 1 responses in the clinician-completed mMRC, these two categories were combined.

SOBDA, Shortness of Breath with Daily Activities; mMRC, modified Medical Research Council dyspnoea rating scale; CGI-S, Clinician Global Impression of Dyspnoea Severity; SE, standard error.

**Table 3** (A) Change in SOBDA weekly score by PGAC responders; (B) Change in SOBDA last treatment week score by assessment responders at visit 3

**A)**

|                                            | Day 8                | Day 15               | Day 22               | Day 29               | Day 36               | Day 43                |
|--------------------------------------------|----------------------|----------------------|----------------------|----------------------|----------------------|-----------------------|
| PGAC responders (n)                        | 105                  | 91                   | 83                   | 62                   | 77                   | 31                    |
| PGAC non-responders (n)                    | 188                  | 212                  | 216                  | 223                  | 200                  | 88                    |
| LS mean difference between groups (95% CI) | 0.24<br>(0.18, 0.31) | 0.12<br>(0.06, 0.19) | 0.11<br>(0.06, 0.16) | 0.11<br>(0.06, 0.17) | 0.13<br>(0.08, 0.18) | 0.06<br>(-0.03, 0.15) |
| p value*                                   | <0.001               | <0.001               | <0.001               | <0.001               | <0.001               | NS                    |

\* Comparison of SOBDA scores (non-responders minus responders) based on analysis of covariance adjusted for age, gender and previous week's SOBDA score.

CI, confidence interval; LS, least squares; NS, not significant; PGAC, Patient Global Assessment of Change; SOBDA, Shortness of Breath with Daily Activities

B)

|                                   | CGI-C        | CRQ-SAS<br>dyspnoea domain | Clinician-completed<br>mMRC | Patient-completed<br>mMRC | PGAC          |
|-----------------------------------|--------------|----------------------------|-----------------------------|---------------------------|---------------|
| Responders (n)                    | 120          | 117                        | 91                          | 92                        | 45            |
| Non-responders (n)                | 181          | 184                        | 210                         | 209                       | 106           |
| LS mean difference between groups | 0.24         | 0.30                       | 0.03                        | 0.08                      | 0.08          |
| (95% CI)                          | (0.14, 0.34) | (0.21, 0.40)               | (-0.08, 0.15)               | (-0.02, 0.19)             | (-0.07, 0.23) |
| p value*                          | <0.001       | <0.001                     | NS                          | NS                        | NS            |

\* Comparison of SOBDA scores (non-responders minus responders) based on Analysis of Covariance adjusted for age, gender and baseline SOBDA weekly score.

CGI-C, Clinician Global Impression of Change; CRQ-SAS, Chronic Respiratory Disease Questionnaire self-administered standardised version; CI, confidence interval; mMRC, modified Medical Research Council; LS, least squares; NS, not significant; PGAC, Patient Global Assessment of Change; SOBDA, Shortness of Breath with Daily Activities

1  
2  
3 **Box 1.** 13-Item SOBDA questionnaire  
4  
5  
6

7 **Figure 1.** Patient disposition  
8  
9

10 \*Patients who completed visits 1 and 2 including those not randomised.  
11

12 †Patients randomised to treatment and received at least one dose of the study drug. One additional  
13 patient was randomised but not treated.  
14

15 BID, twice daily; FSC, fluticasone propionate/salmeterol combination; mITT, modified intent-to-treat;  
16 SAL, salmeterol.  
17  
18  
19  
20  
21  
22  
23  
24  
25  
26  
27  
28  
29  
30  
31  
32  
33  
34  
35  
36  
37  
38  
39  
40  
41  
42  
43  
44  
45  
46  
47  
48  
49  
50  
51  
52  
53  
54  
55  
56  
57  
58  
59  
60

**How short of breath were you when:**

- you put on long pants or stockings?
- you put on your shoes (sandals)?
- you when you washed yourself?
- you reached above your head to put things away?
- you cleaned or fixed something at floor level?
- you put things away in the cupboard or shelf at chest level?
- you put things away in the cupboard or shelf at knee level?
- you prepared food or a meal?
- you picked up light objects off the floor?
- you carried objects at your side like bags or baskets?
- you walked at a slow pace?
- you walked up 3 stairs?
- you walked up 8 stairs?

**Response options included:**

- I did not do the activity today
- Not at all
- Slightly
- Moderately
- Severely
- So severely that I did not do the activity today

216x258mm (150 x 150 DPI)

1  
2  
3  
4  
5  
6  
7  
8  
9  
10  
11  
12  
13  
14  
15  
16  
17  
18  
19  
20  
21  
22  
23  
24  
25  
26  
27  
28  
29  
30  
31  
32  
33  
34  
35  
36  
37  
38  
39  
40  
41  
42  
43  
44  
45  
46  
47  
48  
49  
50  
51  
52  
53  
54  
55  
56  
57  
58  
59  
60

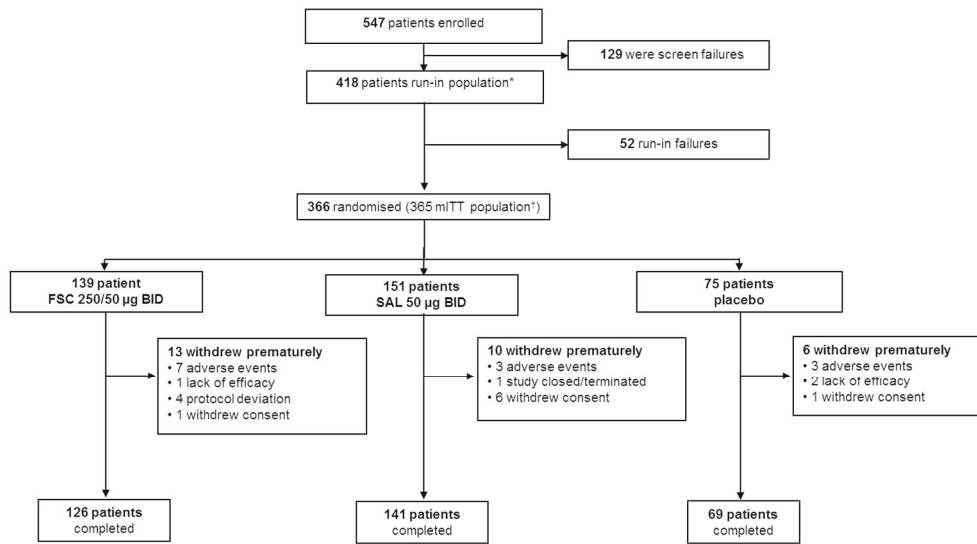

266x160mm (150 x 150 DPI)

review only

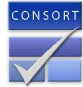

## CONSORT 2010 checklist of information to include when reporting a randomised trial\*

| Section/Topic                    | Item No | Checklist item                                                                                                                                                                              | Reported on page No |
|----------------------------------|---------|---------------------------------------------------------------------------------------------------------------------------------------------------------------------------------------------|---------------------|
| <b>Title and abstract</b>        |         |                                                                                                                                                                                             |                     |
|                                  | 1a      | Identification as a randomised trial in the title                                                                                                                                           | –                   |
|                                  | 1b      | Structured summary of trial design, methods, results, and conclusions (for specific guidance see CONSORT for abstracts)                                                                     | 2, 3                |
| <b>Introduction</b>              |         |                                                                                                                                                                                             |                     |
| Background and objectives        | 2a      | Scientific background and explanation of rationale                                                                                                                                          | 6, 7                |
|                                  | 2b      | Specific objectives or hypotheses                                                                                                                                                           | 7                   |
| <b>Methods</b>                   |         |                                                                                                                                                                                             |                     |
| Trial design                     | 3a      | Description of trial design (such as parallel, factorial) including allocation ratio                                                                                                        | 7                   |
|                                  | 3b      | Important changes to methods after trial commencement (such as eligibility criteria), with reasons                                                                                          | –                   |
| Participants                     | 4a      | Eligibility criteria for participants                                                                                                                                                       | 7                   |
|                                  | 4b      | Settings and locations where the data were collected                                                                                                                                        | 7                   |
| Interventions                    | 5       | The interventions for each group with sufficient details to allow replication, including how and when they were actually administered                                                       | 8                   |
| Outcomes                         | 6a      | Completely defined pre-specified primary and secondary outcome measures, including how and when they were assessed                                                                          | 8–12                |
|                                  | 6b      | Any changes to trial outcomes after the trial commenced, with reasons                                                                                                                       | –                   |
| Sample size                      | 7a      | How sample size was determined                                                                                                                                                              | 10                  |
|                                  | 7b      | When applicable, explanation of any interim analyses and stopping guidelines                                                                                                                | –                   |
| <b>Randomisation:</b>            |         |                                                                                                                                                                                             |                     |
| Sequence generation              | 8a      | Method used to generate the random allocation sequence                                                                                                                                      | 10                  |
|                                  | 8b      | Type of randomisation; details of any restriction (such as blocking and block size)                                                                                                         | 10                  |
| Allocation concealment mechanism | 9       | Mechanism used to implement the random allocation sequence (such as sequentially numbered containers), describing any steps taken to conceal the sequence until interventions were assigned | –                   |
| Implementation                   | 10      | Who generated the random allocation sequence, who enrolled participants, and who assigned participants to interventions                                                                     | 10                  |
| Blinding                         | 11a     | If done, who was blinded after assignment to interventions (for example, participants, care providers, those                                                                                | –                   |

|    |                          |                                                                                                                     |           |
|----|--------------------------|---------------------------------------------------------------------------------------------------------------------|-----------|
| 1  |                          |                                                                                                                     |           |
| 2  |                          | assessing outcomes) and how                                                                                         | 8         |
| 3  |                          |                                                                                                                     |           |
| 4  |                          | 11b If relevant, description of the similarity of interventions                                                     | –         |
| 5  | Statistical methods      | 12a Statistical methods used to compare groups for primary and secondary outcomes                                   | 10–12     |
| 6  |                          | 12b Methods for additional analyses, such as subgroup analyses and adjusted analyses                                | –         |
| 7  |                          |                                                                                                                     |           |
| 8  | <b>Results</b>           |                                                                                                                     |           |
| 9  | Participant flow (a      | 13a For each group, the numbers of participants who were randomly assigned, received intended treatment, and        |           |
| 10 | diagram is strongly      | were analysed for the primary outcome                                                                               | 13, Fig 1 |
| 11 | recommended)             | 13b For each group, losses and exclusions after randomisation, together with reasons                                | 13, Fig 1 |
| 12 | Recruitment              | 14a Dates defining the periods of recruitment and follow-up                                                         | 7–8       |
| 13 |                          | 14b Why the trial ended or was stopped                                                                              | –         |
| 14 |                          |                                                                                                                     |           |
| 15 | Baseline data            | 15 A table showing baseline demographic and clinical characteristics for each group                                 | Table 1   |
| 16 | Numbers analysed         | 16 For each group, number of participants (denominator) included in each analysis and whether the analysis was      |           |
| 17 |                          | by original assigned groups                                                                                         | 13, Fig 1 |
| 18 |                          |                                                                                                                     |           |
| 19 | Outcomes and             | 17a For each primary and secondary outcome, results for each group, and the estimated effect size and its           |           |
| 20 | estimation               | precision (such as 95% confidence interval)                                                                         | 13–16     |
| 21 |                          | 17b For binary outcomes, presentation of both absolute and relative effect sizes is recommended                     | –         |
| 22 | Ancillary analyses       | 18 Results of any other analyses performed, including subgroup analyses and adjusted analyses, distinguishing       |           |
| 23 |                          | pre-specified from exploratory                                                                                      | –         |
| 24 |                          |                                                                                                                     |           |
| 25 | Harms                    | 19 All important harms or unintended effects in each group (for specific guidance see CONSORT for harms)            | 16        |
| 26 |                          |                                                                                                                     |           |
| 27 | <b>Discussion</b>        |                                                                                                                     |           |
| 28 | Limitations              | 20 Trial limitations, addressing sources of potential bias, imprecision, and, if relevant, multiplicity of analyses | 19        |
| 29 | Generalisability         | 21 Generalisability (external validity, applicability) of the trial findings                                        | 16–19     |
| 30 | Interpretation           | 22 Interpretation consistent with results, balancing benefits and harms, and considering other relevant evidence    | 16–19     |
| 31 |                          |                                                                                                                     |           |
| 32 | <b>Other information</b> |                                                                                                                     |           |
| 33 | Registration             | 23 Registration number and name of trial registry                                                                   | Abstract  |
| 34 | Protocol                 | 24 Where the full trial protocol can be accessed, if available                                                      | –         |
| 35 | Funding                  | 25 Sources of funding and other support (such as supply of drugs), role of funders                                  | 19, 20    |
| 36 |                          |                                                                                                                     |           |

\*We strongly recommend reading this statement in conjunction with the CONSORT 2010 Explanation and Elaboration for important clarifications on all the items. If relevant, we also recommend reading CONSORT extensions for cluster randomised trials, non-inferiority and equivalence trials, non-pharmacological treatments, herbal interventions, and pragmatic trials. Additional extensions are forthcoming: for those and for up to date references relevant to this checklist, see [www.consort-statement.org](http://www.consort-statement.org).



CONFIDENTIAL

The GlaxoSmithKline group of companies

ASQ112989

**Division:** Worldwide Development**Information Type:** Clinical Study Report**Control:** Placebo

|               |                                                                                                                                                |
|---------------|------------------------------------------------------------------------------------------------------------------------------------------------|
| <b>Title:</b> | ASQ112989: Validation of a New Shortness of Breath with Daily Activities Questionnaire in patients with Chronic Obstructive Pulmonary Disease. |
|---------------|------------------------------------------------------------------------------------------------------------------------------------------------|

**Phase:** IV**Compound Number:** CCI18781+GR33343**Effective Date:** 10-OCT-2011**Subject:** COPD, Dyspnea, shortness of breath, questionnaire, ADVAIR DISKUS™**Author(s):** [REDACTED]

Indication Studied: COPD

**Clinical Study Report Revision History**

Initiation Date: 29 Oct 2009

Completion Date: 01 Jul 2010 (date of last data entered into database)

Early Termination Date: NA

Date of Report: 10 Oct 2011

**Sponsor Signatory:**  
(and Medical Officer)[REDACTED]  
Director, Clinical Respiratory Medicine Development  
Center, GlaxoSmithKline

This study was performed in compliance with Good Clinical Practices and GlaxoSmithKline Standard Operating Procedures for all processes involved, including the archiving of essential documents.

Copyright 2011 the GlaxoSmithKline group of companies. All rights reserved.  
Unauthorized copying or use of this information is prohibited.

## Table of Contents

|                                                                              | Page |
|------------------------------------------------------------------------------|------|
| TITLE PAGE .....                                                             | 1    |
| ABBREVIATIONS .....                                                          | 12   |
| ETHICS AND GOOD CLINICAL PRACTICE .....                                      | 14   |
| 1. INTRODUCTION .....                                                        | 15   |
| 1.1. Background .....                                                        | 15   |
| 1.2. Rationale .....                                                         | 15   |
| 2. STUDY OBJECTIVES .....                                                    | 16   |
| 3. INVESTIGATORS AND STUDY ADMINISTRATIVE STRUCTURE .....                    | 17   |
| 4. INVESTIGATIONAL PLAN .....                                                | 18   |
| 4.1. Study Design .....                                                      | 18   |
| 4.2. Discussion of Study Design .....                                        | 18   |
| 4.3. Protocol Amendment(s) .....                                             | 18   |
| 4.4. Selection of Study Population .....                                     | 19   |
| 4.4.1. Inclusion/Exclusion Criteria .....                                    | 19   |
| 4.4.2. Randomization Criteria .....                                          | 20   |
| 4.4.3. Withdrawal Criteria .....                                             | 20   |
| 4.5. Treatments .....                                                        | 20   |
| 4.5.1. Investigational Product and Reference Therapy .....                   | 21   |
| 4.5.2. Treatment Assignment .....                                            | 21   |
| 4.5.3. Blinding .....                                                        | 22   |
| 4.5.4. Prior and Concomitant Medications and Non-Drug Therapies .....        | 22   |
| 4.5.5. Treatment Compliance .....                                            | 22   |
| 4.6. Compliance with SOBDA Diary Completion .....                            | 23   |
| 4.7. Study Assessments and Procedures .....                                  | 23   |
| 4.7.1. Questionnaire Validation and Healthcare Utilization Assessments ..... | 23   |
| 4.7.2. Safety Assessments .....                                              | 24   |
| 4.8. Data Quality Assurance .....                                            | 24   |
| 4.9. Statistical Analyses .....                                              | 24   |
| 4.9.1. Timings of Planned Analyses .....                                     | 24   |
| 4.9.2. Sample Size Considerations .....                                      | 24   |
| 4.9.3. Analysis Populations .....                                            | 25   |
| 4.9.4. Comparisons of Interest .....                                         | 26   |
| 4.9.5. General Considerations for Data Analyses .....                        | 27   |
| 4.9.6. Multicentre Studies .....                                             | 27   |
| 4.9.7. Other Strata and Covariates .....                                     | 27   |
| 4.9.8. Examination of Subgroups .....                                        | 27   |
| 4.9.9. Multiple Comparisons and Multiplicity .....                           | 27   |
| 4.9.10. Data Handling Conventions .....                                      | 27   |
| 4.9.11. Study Population .....                                               | 27   |
| 4.9.12. Assessment of Measurement Properties .....                           | 27   |
| 4.9.13. Exploratory Efficacy Analyses .....                                  | 27   |
| 4.9.14. Safety Analyses .....                                                | 27   |
| 5. STUDY POPULATION RESULTS .....                                            | 28   |

|    |                                                                                                    |    |
|----|----------------------------------------------------------------------------------------------------|----|
| 1  |                                                                                                    |    |
| 2  |                                                                                                    |    |
| 3  |                                                                                                    |    |
| 4  | 5.1. Subject Disposition .....                                                                     | 28 |
| 5  | 5.1.1. Screen and Run-in Failures .....                                                            | 28 |
| 6  | 5.1.2. Randomized Subjects .....                                                                   | 29 |
| 7  | 5.2. Protocol Deviations .....                                                                     | 29 |
| 8  | 5.3. Populations Analyzed .....                                                                    | 30 |
| 9  | 5.4. Demographics and Baseline Characteristics .....                                               | 30 |
| 10 | 5.4.1. Current Medical Conditions .....                                                            | 31 |
| 11 | 5.4.2. Past Medical Conditions .....                                                               | 31 |
| 12 | 5.4.3. COPD History and Exacerbation History .....                                                 | 31 |
| 13 | 5.4.4. Smoking History .....                                                                       | 32 |
| 14 | 5.4.5. Lung Function .....                                                                         | 32 |
| 15 | 5.5. Prior and Concomitant Medications .....                                                       | 32 |
| 16 | 5.5.1. COPD Medications .....                                                                      | 32 |
| 17 | 5.6. Exposure and Treatment Compliance .....                                                       | 33 |
| 18 | 6. ASSESSMENT OF MEASUREMENT PROPERTIES .....                                                      | 34 |
| 19 | 6.1. Reliability .....                                                                             | 34 |
| 20 | 6.1.1. Internal Consistency .....                                                                  | 34 |
| 21 | 6.1.2. Test-retest Reliability .....                                                               | 34 |
| 22 | 6.2. Validity .....                                                                                | 35 |
| 23 | 6.2.1. Convergent Validity .....                                                                   | 35 |
| 24 | 6.2.2. Known Group Validity .....                                                                  | 36 |
| 25 | 6.3. Responsiveness .....                                                                          | 36 |
| 26 | 6.3.1. SOBDA Weekly Score Analysis by Patient Global Assessment of<br>Change .....                 | 36 |
| 27 | 6.3.2. SOBDA Last Treatment Week Score Analysis .....                                              | 37 |
| 28 | 6.4. Threshold for SOBDA Responders and Minimally Important Difference .....                       | 38 |
| 29 | 6.4.1. SOBDA Weekly Scores .....                                                                   | 38 |
| 30 | 6.4.2. SOBDA Last Treatment Week Score .....                                                       | 39 |
| 31 | 7. EXPLORATORY EFFICACY .....                                                                      | 39 |
| 32 | 7.1. Threshold for SOBDA Responders and Minimally Important Difference by<br>Treatment Group ..... | 39 |
| 33 | 7.2. SOBDA Diary .....                                                                             | 40 |
| 34 | 7.3. Rescue Medication Use .....                                                                   | 40 |
| 35 | 7.4. Rescue-Free Days .....                                                                        | 40 |
| 36 | 7.5. Global Assessment of Shortness of Breath .....                                                | 41 |
| 37 | 7.6. Patient Global Assessment of Change .....                                                     | 41 |
| 38 | 7.7. Summary of patient exit evaluation .....                                                      | 41 |
| 39 | 7.8. Lung Function .....                                                                           | 41 |
| 40 | 7.9. CRQ-SAS Domain Scores .....                                                                   | 42 |
| 41 | 7.10. Clinician Global Impression of Change .....                                                  | 42 |
| 42 | 7.11. Patient-completed Dyspnea Scale .....                                                        | 42 |
| 43 | 7.12. Clinician-completed mMRC Dyspnea Scale .....                                                 | 43 |
| 44 | 8. HEALTHCARE UTILIZATION .....                                                                    | 44 |
| 45 | 8.1. Summary of Healthcare Provider Contacts via Electronic Daily Diary .....                      | 44 |
| 46 | 8.2. Healthcare Utilization during Run-in .....                                                    | 44 |
| 47 | 8.3. Healthcare Utilization during Treatment .....                                                 | 45 |
| 48 |                                                                                                    |    |
| 49 |                                                                                                    |    |
| 50 |                                                                                                    |    |
| 51 |                                                                                                    |    |
| 52 |                                                                                                    |    |
| 53 |                                                                                                    |    |
| 54 |                                                                                                    |    |
| 55 |                                                                                                    |    |
| 56 |                                                                                                    |    |
| 57 |                                                                                                    |    |
| 58 |                                                                                                    |    |
| 59 |                                                                                                    |    |
| 60 |                                                                                                    |    |

|    |                                                                                  |    |
|----|----------------------------------------------------------------------------------|----|
| 1  |                                                                                  |    |
| 2  |                                                                                  |    |
| 3  |                                                                                  |    |
| 4  | 9. SAFETY RESULTS .....                                                          | 46 |
| 5  | 9.1. Adverse Events .....                                                        | 46 |
| 6  | 9.1.1. Adverse Event Overview .....                                              | 46 |
| 7  | 9.1.2. On-Treatment Adverse Events .....                                         | 46 |
| 8  | 9.1.3. Post-Treatment Adverse Events .....                                       | 47 |
| 9  | 9.1.4. Drug-related Adverse Events on Treatment.....                             | 47 |
| 10 | 9.2. Serious and Other Significant Adverse Events .....                          | 47 |
| 11 | 9.2.1. SAEs prior to treatment .....                                             | 47 |
| 12 | 9.2.2. SAEs during treatment.....                                                | 48 |
| 13 | 9.2.3. SAEs after treatment .....                                                | 48 |
| 14 | 9.2.4. Deaths .....                                                              | 48 |
| 15 | 9.2.5. Other Significant Adverse Events .....                                    | 48 |
| 16 | 9.3. Electrocardiograms .....                                                    | 49 |
| 17 | 9.4. Vital Signs .....                                                           | 50 |
| 18 | 9.5. Pregnancies .....                                                           | 50 |
| 19 | 10. DISCUSSION AND CONCLUSIONS.....                                              | 51 |
| 20 | 10.1. Discussion .....                                                           | 51 |
| 21 | 10.2. Conclusions .....                                                          | 53 |
| 22 | 11. REFERENCES .....                                                             | 55 |
| 23 | 12. CASE NARRATIVES .....                                                        | 57 |
| 24 | 12.1. Serious Adverse Events .....                                               | 57 |
| 25 | 12.2. Adverse Events Leading to Withdrawal.....                                  | 69 |
| 26 | STUDY POPULATION DATA SOURCE TABLES.....                                         | 75 |
| 27 | Table 1.01 Summary of Study Populations (All Subjects Enrolled Population) ..... | 75 |
| 28 | Table 1.02 Summary of Attendance at Each Clinic Visit (All Subjects Enrolled     |    |
| 29 | Population) .....                                                                | 76 |
| 30 | Table 1.03 Summary of Screen Failures (All Subjects Enrolled Population) .....   | 77 |
| 31 | Table 1.04 Summary of Run-In Failures (Run-in Population).....                   | 78 |
| 32 | Table 1.05 Summary of Subject Disposition (Modified Intent-to-treat              |    |
| 33 | Population) .....                                                                | 79 |
| 34 | Table 1.06 Summary of Number of Subjects by Centre (All Subjects Enrolled        |    |
| 35 | Population) .....                                                                | 80 |
| 36 | Table 1.07 Summary of Inclusion/Exclusion/Randomisation Criteria Deviations      |    |
| 37 | for Screen or Run-In Failures (All Subjects Enrolled Population) .....           | 82 |
| 38 | Table 1.08 Summary of Inclusion/Exclusion/Randomisation Criteria Deviations      |    |
| 39 | (Modified Intent-to-treat Population) .....                                      | 83 |
| 40 | Table 1.09 Summary of Protocol Deviations (Modified Intent-to-treat              |    |
| 41 | Population) .....                                                                | 84 |
| 42 | Table 1.10 Summary of Demographic Characteristics (Run-in Population) .....      | 85 |
| 43 | Table 1.11 Summary of Race and Racial Combinations (Run-in Population) .....     | 87 |
| 44 | Table 1.12 Summary of Race and Racial Combination Details (Run-in                |    |
| 45 | Population) .....                                                                | 88 |
| 46 | Table 1.13 Summary of Current Medical Conditions (Run-in Population) .....       | 89 |
| 47 | Table 1.14 Summary of Past Medical Conditions (Run-in Population) .....          | 90 |
| 48 | Table 1.15 Summary of COPD History (Run-in Population).....                      | 91 |
| 49 | Table 1.16 Summary of COPD Exacerbation History (Run-in Population) .....        | 92 |
| 50 |                                                                                  |    |
| 51 |                                                                                  |    |
| 52 |                                                                                  |    |
| 53 |                                                                                  |    |
| 54 |                                                                                  |    |
| 55 |                                                                                  |    |
| 56 |                                                                                  |    |
| 57 |                                                                                  |    |
| 58 |                                                                                  |    |
| 59 |                                                                                  |    |
| 60 |                                                                                  |    |

|    |                                                                            |     |
|----|----------------------------------------------------------------------------|-----|
| 1  |                                                                            |     |
| 2  |                                                                            |     |
| 3  | Table 1.17 Summary of History of Tobacco Use (Run-in Population) .....     | 93  |
| 4  | Table 1.18 Summary of Screening Lung Function (Run-in Population).....     | 94  |
| 5  | Table 1.19 Summary of COPD Medications Taken Before the Run-in (Run-in     |     |
| 6  | Population) .....                                                          | 96  |
| 7  |                                                                            |     |
| 8  | Table 1.20 Summary of COPD Medications Taken During the Run-in (Run-in     |     |
| 9  | Population) .....                                                          | 98  |
| 10 |                                                                            |     |
| 11 | Table 1.21 Summary of COPD Medications Taken During Treatment (Modified    |     |
| 12 | Intent-to-treat Population) .....                                          | 99  |
| 13 | Table 1.22 Summary of COPD Medications Taken Post-Treatment (Modified      |     |
| 14 | Intent-to-treat Population) .....                                          | 101 |
| 15 | Table 1.23 Summary of Non-COPD Medications Taken During the Run-in         |     |
| 16 | (Run-in Population).....                                                   | 103 |
| 17 |                                                                            |     |
| 18 | Table 1.24 Summary of Non-COPD Medications Taken During Treatment          |     |
| 19 | (Modified Intent-to-treat Population) .....                                | 126 |
| 20 | Table 1.25 Summary of Non-COPD Medications Taken Post-Treatment            |     |
| 21 | (Modified Intent-to-treat Population) .....                                | 150 |
| 22 | Table 1.26 Summary of Treatment Compliance (Modified Intent-to-treat       |     |
| 23 | Population) .....                                                          | 172 |
| 24 |                                                                            |     |
| 25 | Table 1.27 Summary of Inhaler Malfunctions (Modified Intent-to-treat       |     |
| 26 | Population) .....                                                          | 173 |
| 27 | OTHER ASSESSMENTS DATA SOURCE FIGURES.....                                 | 174 |
| 28 | Figure 2.01 Scatter Plot of SOBDA Score at Run-in Week 2 vs Run-in Week 1  |     |
| 29 | - Subjects with response of 'no change' on second weekly PGAC              |     |
| 30 | assessment (on the day of or prior to Visit 2) (Run-in Population).....    | 174 |
| 31 |                                                                            |     |
| 32 | Figure 2.02 Scatter Plot of SOBDA Baseline Score vs Physician-Completed    |     |
| 33 | mMRC Score at Visit 2 (Run-in Population).....                             | 175 |
| 34 | Figure 2.03 Scatter Plot of SOBDA Baseline Score vs Participant-Completed  |     |
| 35 | mMRC Score at Visit 2 (Run-in Population).....                             | 176 |
| 36 | Figure 2.04 Scatter Plot of SOBDA Baseline Score vs CRQ-SAS Dyspnoea       |     |
| 37 | Domain Score at Visit 2 (Run-in Population) .....                          | 177 |
| 38 | Figure 2.05 Scatter Plot of SOBDA Baseline Score vs CGI-S Score at Visit 2 |     |
| 39 | (Run-in Population).....                                                   | 178 |
| 40 | Figure 2.06 SOBDA Weekly Scores by CGI-C Response at Visit 3/PD            |     |
| 41 | (Modified Intent-to-treat Population) .....                                | 179 |
| 42 | Figure 2.07 SOBDA Weekly Scores by CRQ-SAS Dyspnoea Domain                 |     |
| 43 | Response at Visit 3/PD (Modified Intent-to-treat Population).....          | 180 |
| 44 | Figure 2.08 SOBDA Weekly Scores by Physician-Completed mMRC Response       |     |
| 45 | at Visit 3/PD (Modified Intent-to-treat Population).....                   | 181 |
| 46 | Figure 2.09 SOBDA Weekly Scores by Participant-Completed mMRC              |     |
| 47 | Response at Visit 3/PD (Modified Intent-to-treat Population).....          | 182 |
| 48 | Figure 2.10 Cumulative Distribution Plot of Change from Baseline to Week 1 |     |
| 49 | SOBDA Score by PGAC Response Categories at Study Day 8                     |     |
| 50 | (Modified Intent-to-treat Population) .....                                | 183 |
| 51 | Figure 2.11 Cumulative Distribution Plot of Change from Week 1 to Week 2   |     |
| 52 | SOBDA Score by PGAC Response Categories at Study Day 15                    |     |
| 53 | (Modified Intent-to-treat Population) .....                                | 184 |
| 54 |                                                                            |     |
| 55 |                                                                            |     |
| 56 |                                                                            |     |
| 57 |                                                                            |     |
| 58 |                                                                            |     |
| 59 |                                                                            |     |
| 60 |                                                                            |     |

|    |                                                                             |     |
|----|-----------------------------------------------------------------------------|-----|
| 1  |                                                                             |     |
| 2  |                                                                             |     |
| 3  |                                                                             |     |
| 4  | Figure 2.12 Cumulative Distribution Plot of Change from Week 2 to Week 3    |     |
| 5  | SOBDA Score by PGAC Response Categories at Study Day 22                     |     |
| 6  | (Modified Intent-to-treat Population) .....                                 | 185 |
| 7  | Figure 2.13 Cumulative Distribution Plot of Change from Week 3 to Week 4    |     |
| 8  | SOBDA Score by PGAC Response Categories at Study Day 29                     |     |
| 9  | (Modified Intent-to-treat Population) .....                                 | 186 |
| 10 | Figure 2.14 Cumulative Distribution Plot of Change from Week 4 to Week 5    |     |
| 11 | SOBDA Score by PGAC Response Categories at Study Day 36                     |     |
| 12 | (Modified Intent-to-treat Population) .....                                 | 187 |
| 13 | Figure 2.15 Cumulative Distribution Plot of Change from Week 5 to Week 6    |     |
| 14 | SOBDA Score by PGAC Response Categories at Study Day 43                     |     |
| 15 | (Modified Intent-to-treat Population) .....                                 | 188 |
| 16 | Figure 2.16 Cumulative Distribution Plot of Change from Baseline in SOBDA   |     |
| 17 | Last Treatment Week Score by CGI-C Response Categories at Visit             |     |
| 18 | 3/PD (Modified Intent-to-treat Population) .....                            | 189 |
| 19 | Figure 2.17 Cumulative Distribution Plot of Percentage Change from Baseline |     |
| 20 | in SOBDA Last Treatment Week Score by CGI-C Response                        |     |
| 21 | Categories at Visit 3/PD (Modified Intent-to-treat Population) .....        | 190 |
| 22 | Figure 2.18 Cumulative Distribution Plot of Change from Baseline in SOBDA   |     |
| 23 | Last Treatment Week Score by CRQ-SAS Dyspnoea Domain 3-Point                |     |
| 24 | Response Categories at Visit 3 (Modified Intent-to-treat Population) .....  | 191 |
| 25 | Figure 2.19 Cumulative Distribution Plot of Percentage Change from Baseline |     |
| 26 | in SOBDA Last Treatment Week Score by CRQ-SAS Dyspnoea                      |     |
| 27 | Domain 3-Point Response Categories at Visit 3 (Modified Intent-to-          |     |
| 28 | treat Population) .....                                                     | 192 |
| 29 | Figure 2.20 Cumulative Distribution Plot of Change from Baseline in SOBDA   |     |
| 30 | Last Treatment Week Score by FEV1 3-Point Response Categories               |     |
| 31 | at Visit 3 (Modified Intent-to-treat Population).....                       | 193 |
| 32 | Figure 2.21 Cumulative Distribution Plot of Percentage Change from Baseline |     |
| 33 | in SOBDA Last Treatment Week Score by FEV1 3-Point Response                 |     |
| 34 | Categories at Visit 3 (Modified Intent-to-treat Population) .....           | 194 |
| 35 | OTHER ASSESSMENTS DATA SOURCE TABLES.....                                   | 195 |
| 36 | Table 2.01 SOBDA Internal Consistency: Cronbachs Alpha Value Subjects       |     |
| 37 | with a score for each SOBDA item on Day 1 of Run-in (Run-in                 |     |
| 38 | Population) .....                                                           | 195 |
| 39 | Table 2.02 SOBDA Test-Retest Reliability - Subjects with response of 'no    |     |
| 40 | change' on second weekly PGAC assessment (on the day of or prior            |     |
| 41 | to Visit 2) (Run-in Population).....                                        | 196 |
| 42 | Table 2.03 SOBDA Convergent Validity (Run-in Population) .....              | 197 |
| 43 | Table 2.04 SOBDA Known Group Validity: Summary of Comparison of SOBDA       |     |
| 44 | Baseline Score with Physician-Completed mMRC at Visit 2 (Run-in             |     |
| 45 | Population) .....                                                           | 198 |
| 46 | Table 2.05 SOBDA Known Group Validity: Analysis of Comparison of SOBDA      |     |
| 47 | Baseline Score with Physician-Completed mMRC at Visit 2 (Run-in             |     |
| 48 | Population) .....                                                           | 199 |
| 49 |                                                                             |     |
| 50 |                                                                             |     |
| 51 |                                                                             |     |
| 52 |                                                                             |     |
| 53 |                                                                             |     |
| 54 |                                                                             |     |
| 55 |                                                                             |     |
| 56 |                                                                             |     |
| 57 |                                                                             |     |
| 58 |                                                                             |     |
| 59 |                                                                             |     |
| 60 |                                                                             |     |

|    |                                                                        |     |
|----|------------------------------------------------------------------------|-----|
| 1  |                                                                        |     |
| 2  |                                                                        |     |
| 3  |                                                                        |     |
| 4  | Table 2.06 SOBDA Known Group Validity: Summary of Comparison of SOBDA  |     |
| 5  | Baseline Score with Participant- Completed mMRC at Visit 2 (Run-in     |     |
| 6  | Population) .....                                                      | 200 |
| 7  | Table 2.07 SOBDA Known Group Validity: Analysis of Comparison of SOBDA |     |
| 8  | Baseline Score with Participant- Completed mMRC at Visit 2 (Run-in     |     |
| 9  | Population) .....                                                      | 201 |
| 10 | Table 2.08 SOBDA Known Group Validity: Summary of Comparison of SOBDA  |     |
| 11 | Baseline Score with CGI-S at Visit 2 (Run-in Population).....          | 202 |
| 12 | Table 2.09 SOBDA Known Group Validity: Analysis of Comparison of SOBDA |     |
| 13 | Baseline Score with CGI-S at Visit 2 (Run-in Population).....          | 203 |
| 14 | Table 2.10 SOBDA Responsiveness: Summary of SOBDA Treatment Week 1     |     |
| 15 | Score by PGAC Response at Study Day 8 (Modified intent-to-treat        |     |
| 16 | Population) .....                                                      | 204 |
| 17 | Table 2.11 SOBDA Responsiveness: Analysis of SOBDA Treatment Week 1    |     |
| 18 | Score by PGAC Response at Study Day 8 (Modified intent-to-treat        |     |
| 19 | Population) .....                                                      | 205 |
| 20 | Table 2.12 SOBDA Responsiveness: Summary of SOBDA Treatment Week 2     |     |
| 21 | Score by PGAC Response at Study Day 15 (Modified intent-to-treat       |     |
| 22 | Population) .....                                                      | 206 |
| 23 | Table 2.13 SOBDA Responsiveness: Analysis of SOBDA Treatment Week 2    |     |
| 24 | Score by PGAC Response at Study Day 15 (Modified intent-to-treat       |     |
| 25 | Population) .....                                                      | 207 |
| 26 | Table 2.14 SOBDA Responsiveness: Summary of SOBDA Treatment Week 3     |     |
| 27 | Score by PGAC Response at Study Day 22 (Modified intent-to-treat       |     |
| 28 | Population) .....                                                      | 208 |
| 29 | Table 2.15 SOBDA Responsiveness: Analysis of SOBDA Treatment Week 3    |     |
| 30 | Score by PGAC Response at Study Day 22 (Modified intent-to-treat       |     |
| 31 | Population) .....                                                      | 209 |
| 32 | Table 2.16 SOBDA Responsiveness: Summary of SOBDA Treatment Week 4     |     |
| 33 | Score by PGAC Response at Study Day 29 (Modified intent-to-treat       |     |
| 34 | Population) .....                                                      | 210 |
| 35 | Table 2.17 SOBDA Responsiveness: Analysis of SOBDA Treatment Week 4    |     |
| 36 | Score by PGAC Response at Study Day 29 (Modified intent-to-treat       |     |
| 37 | Population) .....                                                      | 211 |
| 38 | Table 2.18 SOBDA Responsiveness: Summary of SOBDA Treatment Week 5     |     |
| 39 | Score by PGAC Response at Study Day 36 (Modified intent-to-treat       |     |
| 40 | Population) .....                                                      | 212 |
| 41 | Table 2.19 SOBDA Responsiveness: Analysis of SOBDA Treatment Week 5    |     |
| 42 | Score by PGAC Response at Study Day 36 (Modified intent-to-treat       |     |
| 43 | Population) .....                                                      | 213 |
| 44 | Table 2.20 SOBDA Responsiveness: Summary of SOBDA Treatment Week 6     |     |
| 45 | Score by PGAC Response at Study Day 43 (Modified intent-to-treat       |     |
| 46 | Population) .....                                                      | 214 |
| 47 | Table 2.21 SOBDA Responsiveness: Analysis of SOBDA Treatment Week 6    |     |
| 48 | Score by PGAC Response at Study Day 43 (Modified intent-to-treat       |     |
| 49 | Population) .....                                                      | 215 |
| 50 |                                                                        |     |
| 51 |                                                                        |     |
| 52 |                                                                        |     |
| 53 |                                                                        |     |
| 54 |                                                                        |     |
| 55 |                                                                        |     |
| 56 |                                                                        |     |
| 57 |                                                                        |     |
| 58 |                                                                        |     |
| 59 |                                                                        |     |
| 60 |                                                                        |     |

|    |                                                                     |     |
|----|---------------------------------------------------------------------|-----|
| 1  |                                                                     |     |
| 2  |                                                                     |     |
| 3  | Table 2.22 SOBDA Responsiveness: Summary of SOBDA Last Treatment    |     |
| 4  | Week Score by PGAC Response at Visit 3 (Modified intent-to-treat    |     |
| 5  | Population) .....                                                   | 216 |
| 6  |                                                                     |     |
| 7  | Table 2.23 SOBDA Responsiveness: Analysis of SOBDA Last Treatment   |     |
| 8  | Week Score by PGAC Response at Visit 3 (Modified intent-to-treat    |     |
| 9  | Population) .....                                                   | 217 |
| 10 |                                                                     |     |
| 11 | Table 2.24 SOBDA Responsiveness: Summary of SOBDA Last Treatment    |     |
| 12 | Week Score by CGI-C Response at Visit 3 (Modified intent-to-treat   |     |
| 13 | Population) .....                                                   | 218 |
| 14 |                                                                     |     |
| 15 | Table 2.25 SOBDA Responsiveness: Analysis of SOBDA Last Treatment   |     |
| 16 | Week Score by CGI-C Response at Visit 3 (Modified intent-to-treat   |     |
| 17 | Population) .....                                                   | 219 |
| 18 |                                                                     |     |
| 19 | Table 2.26 SOBDA Responsiveness: Summary of SOBDA Last Treatment    |     |
| 20 | Week Score by CRQ-SAS Dyspnoea Domain Response at Visit 3           |     |
| 21 | (Modified intent-to-treat Population) .....                         | 220 |
| 22 |                                                                     |     |
| 23 | Table 2.27 SOBDA Responsiveness: Analysis of SOBDA Last Treatment   |     |
| 24 | Week Score by CRQ-SAS Dyspnoea Domain Response at Visit 3           |     |
| 25 | (Modified intent-to-treat Population) .....                         | 221 |
| 26 |                                                                     |     |
| 27 | Table 2.28 SOBDA Responsiveness: Summary of SOBDA Last Treatment    |     |
| 28 | Week Score by Physician-Completed mMRC Response at Visit 3          |     |
| 29 | (Modified intent-to-treat Population) .....                         | 222 |
| 30 |                                                                     |     |
| 31 | Table 2.29 SOBDA Responsiveness: Analysis of SOBDA Last Treatment   |     |
| 32 | Week Score by Physician-Completed mMRC Response at Visit 3          |     |
| 33 | (Modified intent-to-treat Population) .....                         | 223 |
| 34 |                                                                     |     |
| 35 | Table 2.30 SOBDA Responsiveness: Summary of SOBDA Last Treatment    |     |
| 36 | Week Score by Participant-Completed mMRC Response at Visit 3        |     |
| 37 | (Modified intent-to-treat Population) .....                         | 224 |
| 38 |                                                                     |     |
| 39 | Table 2.31 SOBDA Responsiveness: Analysis of SOBDA Last Treatment   |     |
| 40 | Week Score by Participant-Completed mMRC Response at Visit 3        |     |
| 41 | (Modified intent-to-treat Population) .....                         | 225 |
| 42 |                                                                     |     |
| 43 | Table 2.32 SOBDA Threshold for Response: Summary of SOBDA Treatment |     |
| 44 | Week 1 Score by PGAC Response Category at Study Day 8               |     |
| 45 | (Modified Intent-to-treat Population) .....                         | 226 |
| 46 |                                                                     |     |
| 47 | Table 2.33 SOBDA Threshold for Response: Summary of SOBDA Treatment |     |
| 48 | Week 2 Score by PGAC Response Category at Study Day 15              |     |
| 49 | (Modified Intent-to-treat Population) .....                         | 227 |
| 50 |                                                                     |     |
| 51 | Table 2.34 SOBDA Threshold for Response: Summary of SOBDA Treatment |     |
| 52 | Week 3 Score by PGAC Response Category at Study Day 22              |     |
| 53 | (Modified Intent-to-treat Population) .....                         | 228 |
| 54 |                                                                     |     |
| 55 | Table 2.35 SOBDA Threshold for Response: Summary of SOBDA Treatment |     |
| 56 | Week 4 Score by PGAC Response Category at Study Day 29              |     |
| 57 | (Modified Intent-to-treat Population) .....                         | 229 |
| 58 |                                                                     |     |
| 59 | Table 2.36 SOBDA Threshold for Response: Summary of SOBDA Treatment |     |
| 60 | Week 5 Score by PGAC Response Category at Study Day 36              |     |
|    | (Modified Intent-to-treat Population) .....                         | 230 |



|    |                                                                              |     |
|----|------------------------------------------------------------------------------|-----|
| 1  |                                                                              |     |
| 2  |                                                                              |     |
| 3  |                                                                              |     |
| 4  | Table 2.37 SOBDA Threshold for Response: Summary of SOBDA Treatment          |     |
| 5  | Week 6 Score by PGAC Response Category at Study Day 43                       |     |
| 6  | (Modified Intent-to-treat Population) .....                                  | 231 |
| 7  | Table 2.38 SOBDA Threshold for Response: Summary of SOBDA Last               |     |
| 8  | Treatment Week Score by CGI-C Response Category at Visit 3                   |     |
| 9  | (Modified Intent-to-treat Population) .....                                  | 232 |
| 10 | Table 2.39 SOBDA Threshold for Response: Summary of SOBDA Last               |     |
| 11 | Treatment Week Score by CRQ-SAS Dyspnoea Domain 3-Point                      |     |
| 12 | Response Category at Visit 3 (Modified Intent-to-treat Population) .....     | 233 |
| 13 | Table 2.40 SOBDA Threshold for Response: Summary of SOBDA Last               |     |
| 14 | Treatment Week Score by FEV1 3-Point Response Category at Visit              |     |
| 15 | 3 (Modified Intent-to-treat Population) .....                                | 234 |
| 16 |                                                                              |     |
| 17 | EFFICACY DATA SOURCE FIGURES .....                                           | 235 |
| 18 | Figure 3.01 Cumulative Distribution Plot of Change from Baseline in SOBDA    |     |
| 19 | Last Treatment Week Score by Treatment Daily Mean Score:                     |     |
| 20 | Rescored Response Categories (Modified Intent-to-treat Population)....       | 235 |
| 21 |                                                                              |     |
| 22 | EFFICACY DATA SOURCE TABLES .....                                            | 236 |
| 23 | Table 3.01 Summary of Compliance with SOBDA Diary Completion (Modified       |     |
| 24 | Intent-to-treat Population) .....                                            | 236 |
| 25 |                                                                              |     |
| 26 | Table 3.02 Summary of SOBDA Summary Scores (Run-in Population) .....         | 237 |
| 27 | Table 3.03 Summary of Change from Baseline in SOBDA Summary Scores           |     |
| 28 | (Modified Intent-to-treat Population) .....                                  | 240 |
| 29 | Table 3.04 Summary of SOBDA Summary Score Response (Modified Intent-         |     |
| 30 | to-treat Population) .....                                                   | 242 |
| 31 | Table 3.05 Analysis of Change from Baseline in SOBDA Last Treatment Week     |     |
| 32 | Score (Modified Intent-to-treat Population) .....                            | 244 |
| 33 | Table 3.06 Summary of Mean Number of Puffs of Rescue per Day (Run-in         |     |
| 34 | Population) .....                                                            | 245 |
| 35 | Table 3.07 Summary of Change from Baseline in Mean Number of Puffs of        |     |
| 36 | Rescue per Day (Modified Intent-to-treat Population).....                    | 248 |
| 37 | Table 3.08 Summary of Percentage of Rescue-Free Days (Run-in Population) ... | 250 |
| 38 | Table 3.09 Summary of Change from Baseline in Percentage of Rescue-Free      |     |
| 39 | Days (Modified Intent-to-treat Population) .....                             | 253 |
| 40 | Table 3.10 Summary of Global Assessment of Shortness of Breath (Run-in       |     |
| 41 | Population) .....                                                            | 255 |
| 42 | Table 3.11 Summary of PGAC (Run-in Population) .....                         | 269 |
| 43 | Table 3.12 Summary of PGAC Response (Run-in Population) .....                | 272 |
| 44 | Table 3.13 Summary of Participant Exit Evaluation (Modified Intent-to-treat  |     |
| 45 | Population) .....                                                            | 274 |
| 46 | Table 3.14 Summary of FEV1 (Modified Intent-to-treat Population) .....       | 276 |
| 47 | Table 3.15 Summary of Change from Baseline in FEV1 at Visit 3/PD (Modified   |     |
| 48 | Intent-to-treat Population) .....                                            | 277 |
| 49 | Table 3.16 Summary of FEV1 Response at Visit 3/PD (Modified Intent-to-treat  |     |
| 50 | Population) .....                                                            | 278 |
| 51 | Table 3.17 Summary of FVC (Modified Intent-to-treat Population).....         | 279 |
| 52 |                                                                              |     |
| 53 |                                                                              |     |
| 54 |                                                                              |     |
| 55 |                                                                              |     |
| 56 |                                                                              |     |
| 57 |                                                                              |     |
| 58 |                                                                              |     |
| 59 |                                                                              |     |
| 60 |                                                                              |     |

|    |                                                                               |     |
|----|-------------------------------------------------------------------------------|-----|
| 1  |                                                                               |     |
| 2  |                                                                               |     |
| 3  |                                                                               |     |
| 4  | Table 3.18 Summary of Change from Baseline in FVC at Visit 3/PD (Modified     |     |
| 5  | Intent-to-treat Population) .....                                             | 280 |
| 6  | Table 3.19 Summary of CRQ-SAS Domain Scores (Run-in Population).....          | 281 |
| 7  | Table 3.20 Summary of Change from Baseline in CRQ-SAS Domain Scores at        |     |
| 8  | Visit 3/PD (Modified Intent-to-treat Population).....                         | 283 |
| 9  | Table 3.21 Summary of CRQ-SAS Dyspnoea Domain Response (Modified              |     |
| 10 | Intent-to-treat Population) .....                                             | 284 |
| 11 | Table 3.22 Summary of CGI-S (Run-in Population) .....                         | 285 |
| 12 | Table 3.23 Summary of CGI-C (Modified Intent-to-treat Population).....        | 286 |
| 13 | Table 3.24 Summary of Participant-Completed mMRC Dyspnoea Scale (Run-         |     |
| 14 | in Population).....                                                           | 287 |
| 15 | Table 3.25 Summary of Participant-Completed mMRC Response (Modified           |     |
| 16 | Intent-to-treat Population) .....                                             | 290 |
| 17 | Table 3.26 Summary of Physician-Completed mMRC Dyspnoea Scale (Run-in         |     |
| 18 | Population) .....                                                             | 291 |
| 19 | Table 3.27 Summary of Physician-Completed mMRC Response (Modified             |     |
| 20 | Intent-to-treat Population) .....                                             | 294 |
| 21 | Table 3.27 Summary of Physician-Completed mMRC Response (Modified             |     |
| 22 | Intent-to-treat Population) .....                                             | 294 |
| 23 | SAFETY DATA SOURCE TABLES .....                                               | 295 |
| 24 | Table 4.01 Summary of Exposure to Study Drug (Modified Intent-to-treat        |     |
| 25 | Population) .....                                                             | 295 |
| 26 | Table 4.02 On-Treatment Adverse Event Overview (Modified Intent-to-treat      |     |
| 27 | Population) .....                                                             | 296 |
| 28 | Table 4.03 Summary of On-Treatment Adverse Events (Modified Intent-to-treat   |     |
| 29 | Population) .....                                                             | 297 |
| 30 | Table 4.04 Summary of Post-Treatment Adverse Events (Modified Intent-to-      |     |
| 31 | treat Population) .....                                                       | 302 |
| 32 | Table 4.05 Summary of Serious Adverse Events for Subjects Who did not         |     |
| 33 | Receive Randomised Treatment (All Subjects Enrolled Population) .....         | 304 |
| 34 | Table 4.06 Summary of Pre-Treatment Serious Adverse Events (Modified          |     |
| 35 | Intent-to-treat Population) .....                                             | 305 |
| 36 | Table 4.07 Summary of On-Treatment Serious Adverse Events (Modified           |     |
| 37 | Intent-to-treat Population) .....                                             | 306 |
| 38 | Table 4.08 Summary of Post-Treatment Serious Adverse Events (Modified         |     |
| 39 | Intent-to-treat Population) .....                                             | 308 |
| 40 | Table 4.09 Summary of Drug-Related On-Treatment Adverse Events (Modified      |     |
| 41 | Intent-to-treat Population) .....                                             | 309 |
| 42 | Table 4.10 Summary of On-Treatment Adverse Events Leading to Permanent        |     |
| 43 | Discontinuation of Investigational Product and/or Withdrawal from             |     |
| 44 | Study (Modified Intent-to-treat Population) .....                             | 311 |
| 45 | Table 4.11 Summary of Vital Signs (Modified Intent-to-treat Population) ..... | 313 |
| 46 | Table 4.12 Summary of ECG Findings at Screening (All Subjects Enrolled        |     |
| 47 | Population) .....                                                             | 316 |
| 48 | Table 4.13 Summary of On-Treatment COPD Exacerbations (Modified Intent-       |     |
| 49 | to-treat Population) .....                                                    | 317 |
| 50 | HEALTH OUTCOMES DATA SOURCE TABLES .....                                      | 318 |
| 51 | Table 5.01 Summary of Healthcare Provider Contacts (Run-in Population).....   | 318 |
| 52 |                                                                               |     |
| 53 |                                                                               |     |
| 54 |                                                                               |     |
| 55 |                                                                               |     |
| 56 |                                                                               |     |
| 57 |                                                                               |     |
| 58 |                                                                               |     |
| 59 |                                                                               |     |
| 60 |                                                                               |     |

ASQ112989

|                                                                                                                          |     |
|--------------------------------------------------------------------------------------------------------------------------|-----|
| Table 5.02 Summary of Unscheduled Healthcare Utilisation During the Run-in<br>(Run-in Population).....                   | 319 |
| Table 5.03 Summary of Unscheduled Healthcare Utilisation During Treatment<br>(Modified Intent-to-treat Population) ..... | 321 |

For peer review only

1  
2  
3  
4  
5  
6  
7  
8  
9  
10  
11  
12  
13  
14  
15  
16  
17  
18  
19  
20  
21  
22  
23  
24  
25  
26  
27  
28  
29  
30  
31  
32  
33  
34  
35  
36  
37  
38  
39  
40  
41  
42  
43  
44  
45  
46  
47  
48  
49  
50  
51  
52  
53  
54  
55  
56  
57  
58  
59  
60

**Abbreviations**

|    |                  |                                                          |
|----|------------------|----------------------------------------------------------|
| 1  |                  |                                                          |
| 2  |                  |                                                          |
| 3  |                  |                                                          |
| 4  |                  |                                                          |
| 5  | AE               | Adverse Event                                            |
| 6  | ANOVA            | Analysis of Variance                                     |
| 7  | ATS              | American Thoracic Society                                |
| 8  | BID              | Twice Daily                                              |
| 9  | CGI-S            | Clinician Global Impression of Dyspnea Severity          |
| 10 | CGI-C            | Clinical Global Impression of Change                     |
| 11 | COPD             | Chronic Obstructive Pulmonary Disease                    |
| 12 | CRF              | Case Report Form                                         |
| 13 | CRQ-SAS          | Chronic Respiratory Disease Questionnaire                |
| 14 | ECG              | Electrocardiogram                                        |
| 15 | EMEA             | European Agency for the Evaluation of Medicinal Products |
| 16 | FDA              | Food and Drug Administration                             |
| 17 | FEV <sub>1</sub> | Forced Expiratory Volume in one second                   |
| 18 | FSC              | Fluticasone propionate/salmeterol combination product    |
| 19 | FVC              | Forced Vital Capacity                                    |
| 20 | GCP              | Good Clinical Practice                                   |
| 21 | GCSP             | Global Clinical Safety and Pharmacovigilance             |
| 22 | GOLD             | Global Initiative for Chronic Obstructive Lung Disease   |
| 23 | GSK              | GlaxoSmithKline                                          |
| 24 | IEC              | Independent Ethics Committee                             |
| 25 | IRB              | Institutional Review Board                               |
| 26 | mITT             | Modified Intent-to-Treat                                 |
| 27 | IVRS             | Interactive Voice Response System                        |
| 28 | L                | Liter                                                    |
| 29 | LAMA             | Long-acting muscarinic antagonist                        |
| 30 | LABA             | Long-acting beta agonist                                 |
| 31 | mcg              | Microgram                                                |
| 32 | MedRA            | Medical Dictionary for Regulatory Activities             |
| 33 | MID              | Minimal Important difference                             |
| 34 | MLFA             | Maximum Likelihood Factor Analysis                       |
| 35 | mMRC             | Modified Medical Research Council Dyspnea Scale          |
| 36 | NHANES           | National Health and Nutrition Examination Survey         |
| 37 | PD               | Premature Discontinuation                                |
| 38 | PEF              | Peak Expiratory Flow                                     |
| 39 | PGAC             | Patient Global Assessment of Change                      |
| 40 | PRO              | Patient Reported Outcome                                 |
| 41 | QoL              | Quality of Life                                          |
| 42 | SAE              | Serious Adverse Event                                    |
| 43 | SBQ              | Shortness of Breath Questionnaire                        |
| 44 | SAL              | Salmeterol                                               |
| 45 | SEALD            | Study Endpoint and Label Development                     |
| 46 | SGRQ             | St. George's Respiratory Questionnaire                   |
| 47 | SOBDA            | Shortness of Breath with Daily Activities                |
| 48 | SES              | Standardized Effect Size                                 |
| 49 | SNP              | Single Nucleotide Polymorphism                           |
| 50 | SOC              | System Organ Class                                       |
| 51 |                  |                                                          |
| 52 |                  |                                                          |
| 53 |                  |                                                          |
| 54 |                  |                                                          |
| 55 |                  |                                                          |
| 56 |                  |                                                          |
| 57 |                  |                                                          |
| 58 |                  |                                                          |
| 59 |                  |                                                          |
| 60 |                  |                                                          |

SRM Study Reference Manual  
UHU Unscheduled Healthcare Utilization

### Trademark Information

| Trademarks of the GlaxoSmithKline group of companies |
|------------------------------------------------------|
| DISKUS                                               |
|                                                      |
|                                                      |

| Trademarks not owned by the GlaxoSmithKline group of companies |
|----------------------------------------------------------------|
| SAS                                                            |
| UNIX                                                           |
| HARP                                                           |

For peer review only

1  
2  
3  
4  
5  
6  
7  
8  
9  
10  
11  
12  
13  
14  
15  
16  
17  
18  
19  
20  
21  
22  
23  
24  
25  
26  
27  
28  
29  
30  
31  
32  
33  
34  
35  
36  
37  
38  
39  
40  
41  
42  
43  
44  
45  
46  
47  
48  
49  
50  
51  
52  
53  
54  
55  
56  
57  
58  
59  
60

## ETHICS AND GOOD CLINICAL PRACTICE

The study protocol, any amendments, the informed consent, and other information that required pre-approval were reviewed and approved by a national, regional, or investigational center ethics committee or institutional review board, in accordance with the International Conference on Harmonization of Technical Requirements for Registration of Pharmaceuticals for Human Use (ICH) Good Clinical Practice (GCP) and applicable country-specific requirements, including US 21 Code of Federal Regulations (CFR) 312.3(b) for constitution of independent ethics committees. Ethics committee or institutional review board approvals are maintained in the Sponsor's study file.

This study was conducted in accordance with ICH GCP and all applicable subject privacy requirements, and, the ethical principles that are outlined in the Declaration of Helsinki 2008.

Investigators were trained to conduct the study in accordance with GCPs and the study protocol as defined in ICH E3, Section 9.6. Written commitments were obtained from investigators to comply with GCP and to conduct the study in accordance with the protocol. The study was monitored in accordance with ICH E6, Section 5.18.

Written informed consent was obtained from each subject prior to the performance of any study-specific procedures. The subject was provided as much time as necessary to review the document, to inquire about details of the trial, and to decide whether or not to participate in the study. The informed consent was signed and dated by the study subject and by the person who conducted the informed consent discussion. Case report forms were provided for each subject's data to be recorded.

## 1. INTRODUCTION

### 1.1. Background

Approximately 10 million Americans suffer from chronic obstructive pulmonary disease (COPD). However, according to a national health survey as many as 24 million Americans are affected, indicating an under-diagnosis of COPD [CDC, 2006]. COPD is a major cause of death and illness throughout the world. In the US, it is currently the fourth leading cause of death and is projected to be the third leading cause of death by 2020 [Nunnally, 1994; Petty, 2003]. In the past, COPD was a disease affecting mostly men. However, new findings have reported that in the year 2002, COPD resulted in more deaths in females than males [Mannino, 2002].

COPD is a disease in which the lungs are damaged, making it difficult to breathe. Although a person's genetic make-up likely play a role in the disease process, studies have repeatedly found that cigarette smoking is the most important and consistent determinant of COPD development [Stang, 2000]. Inhaling lung irritants, such as pollution, dust, or chemicals over prolonged periods may also cause or contribute to COPD. This is a slowly progressive disease and it may require many years before symptoms develop. Therefore, in most cases, COPD is diagnosed in middle-age or later in life.

The diagnosis of COPD is confirmed by the measurement of airflow limitation using spirometry (a post-bronchodilator ratio of forced expiratory volume in 1 second (FEV<sub>1</sub>) to forced vital capacity (FVC) of less than 70% which is not fully reversible). Accordingly, severity assessment of airflow obstruction and need for treatment is primarily based on the percentage of predicted FEV<sub>1</sub>. However, spirometric tests have been shown to correlate poorly with symptoms in moderate and severe subjects. It is also now recognized that FEV<sub>1</sub> does not fully describe the severity of the disability in COPD and that additional measurements are needed. Specific respiratory health status measures, shortness of breath scales, performance exercises, and exacerbation rates have been developed to provide a more complete picture of the impact of COPD over time [MacNee, 2003].

### 1.2. Rationale

Dyspnea, referred to by patients as "shortness of breath" or "breathlessness," is frequently associated with decreases in functional status, quality of life (QoL), and disabilities [ATS, 1999]. According to a telephone survey of 3,000 patients with Chronic Obstructive Pulmonary Disease (COPD), 56% of patients were found to have breathlessness during normal physical activities and 42% reported breathlessness while doing household chores [Rennard, 2002]. While the patient-reported aspects of COPD have been assessed using questionnaires such as the Chronic Respiratory Disease Questionnaire (CRQ) and St. George's Respiratory Questionnaire (SGRQ), current questionnaires that are available do not specifically address the shortness of breath component of COPD or are not appropriate to be used as an endpoint during drug development. For this reason, GSK has undertaken the development of a patient reported

1  
2  
3 outcome (PRO) questionnaire that will specifically assess Shortness of Breath with Daily  
4 Activities (SOBDA) in patients with COPD.

5  
6 GSK have met with the Division of Pulmonary, Allergy and Rheumatology Drug  
7 Products on multiple occasions to discuss the development of a patient-reported outcome  
8 instrument to measure dyspnea in patients with COPD. In 2006, the division highlighted  
9 several areas where further research was needed to support the proposed instrument, the  
10 Shortness of Breath Questionnaire (SBQ). Based on this feedback, GSK re-initiated the  
11 process of instrument development, beginning with an updated literature review,  
12 extensive qualitative research, and new item pool development.

13  
14  
15 The comments and recommendations made by the division in 2006 were implemented in  
16 the development of a new instrument, the Shortness of Breath with Daily Activities  
17 (SOBDA) questionnaire. As of the date of this abbreviated report, GSK are actively  
18 working with the division/SEALD to agree on the content validity of the questionnaire  
19 and appropriate alternative scoring so that it can be used to support labelling claims.

20  
21  
22 GSK have also sought advice from the European Medicines Agency (EMA) on the use of  
23 SOBDA as the key secondary endpoint within the clinical programme for LAMA/LABA  
24 combination products. EMA endorsed the methodology used in SOBDA development to  
25 date and, whilst noting that development was US based, also endorsed translation and  
26 linguistic validation plans. Due to lack of experience with the tool they were only able to  
27 support the use of SOBDA as an exploratory endpoint until sufficient experience is  
28 gained in a clinical trial setting.

29  
30  
31 The SOBDA questionnaire has previously been examined in an observational study to  
32 item-reduce the questionnaire and evaluate its psychometric and clinimetric attributes.  
33 The SOBDA questionnaire was then assessed in this prospective interventional study  
34 using an electronic daily diary to further test the reliability (consistency at a given point  
35 in time, and stability during repeat measures over time) and the validity (ability of the  
36 questionnaire to measure the required information) and responsiveness (ability of the  
37 questionnaire to measure changes over time), define the threshold for responders and to  
38 determine the minimum important difference (MID) of the final questionnaire. These  
39 characteristics ensure that a measure will be useful in cross-sectional and longitudinal  
40 prospective studies, and will produce results that will be relevant and meaningful, rather  
41 than results that are due to an artifact of the metric or to measurement error.

## 42 43 44 45 **2. STUDY OBJECTIVES**

46  
47  
48 The objective of this study was the validation of the SOBDA Questionnaire as defined by  
49 the following:

50  
51 Confirm the cross-sectional and longitudinal psychometric properties of the final  
52 questionnaire.

53  
54 Evaluate the responsiveness of the final questionnaire.

55  
56 Define the threshold for responders for the questionnaire.

57  
58 Determine the minimally important difference.



### 3. INVESTIGATORS AND STUDY ADMINISTRATIVE STRUCTURE

This was a study conducted in the United States only and sponsored by GSK. A total of 40 centers randomized 366 subjects to treatment. The study was initiated on 29 Oct 2009 (first subject screened) and was completed on 01 July 2010 (last subject data entered into the database).

GSK Clinical Data Sciences in Toronto, Canada and GSK Statistics and Programming in Stockley Park, UK, conducted the data management and statistical analysis, respectively, for this study.

All investigators and responsible study site staff attended an investigator training meeting and/or separate study site initiation visit to review study protocol procedures, study requirements, and GCP responsibilities. Investigators and staff were given opportunity to discuss any aspect of the study protocol and GCP requirements. Training records were reviewed to ensure investigators and staff were qualified to conduct the study and to document training in GCP. Any staff lacking in GCP training were either sent to a GCP training course or provided an electronic GCP training module. Documentation of GCP training was confirmed prior to staff participation in the study.

Principal investigators signed the investigator page of the protocol to confirm their commitment to conduct the study in accord with the protocol and GCP. The signed documents have been archived within individual investigator study files.

Written informed consent was obtained from each subject prior to the performance of any study-specific procedures. The subject was provided as much time as necessary to review the document, to inquire about details of the trial, and to decide whether or not to participate in the study. The informed consent was signed and dated by the study subject and by the person who conducted the informed consent discussion. Electronic case report forms (eCRF) were created for each subject's data to be recorded.

In accordance with applicable regulations, GCP and GSK procedures, GSK monitors contacted the site prior to the start of the study to review with the site staff the protocol, study requirements, and their responsibilities to satisfy regulatory, ethical, and GSK requirements. When reviewing data collection procedures, the discussion included identification, agreement and documentation of data items for which the CRF served as the source document. GSK monitored the study to ensure that: (1) the data are authentic, accurate, and complete; (2) the safety and rights of subjects were protected; (3) the study was conducted in accordance with the currently approved protocol and any other study agreements, GCP and all applicable regulatory requirements.

## 4. INVESTIGATIONAL PLAN

### 4.1. Study Design

This was a multi-center, randomized, double-blind, parallel-group study of FSC 250/50mcg, SAL 50mcg, and placebo BID via DISKUS™ over 6 weeks in subjects with COPD. Approximately 350 subjects were planned to be randomized 2:2:1, to FSC 250/50mcg, SAL 50mcg and placebo respectively.

Following Screening (Visit 1), the study commenced with a 2-week run-in period, during which subjects were permitted to use albuterol and/or ipratropium as rescue medication. Subjects using ipratropium prior to the screening visit could continue using ipratropium during the study. Eligible subjects at Visit 2 were randomized to receive FSC 250/50mcg BID, SAL 50mcg BID, or placebo BID. An additional clinic visit occurred after 6 weeks of treatment (Visit 3). In the event that a subject withdrew from the study for any reason, the investigator was to make every effort to have the subject return to the clinic as soon as possible for a Premature Discontinuation Visit. Subjects were contacted by telephone 14 ± 2 days after the last clinic visit (Visit 3 or Premature Discontinuation Visit) for identification of adverse events (AEs) and pregnancy (as applicable).

### 4.2. Discussion of Study Design

The clinical endpoints for this study were selected to investigate the cross-sectional and longitudinal validity of the SOBDA in relation to clinical criteria. These clinical endpoints were chosen based upon clinical judgment and a review of the literature that indicated some empirical support for their relationship with shortness of breath with daily activities. Based upon previous clinical trial experience with FSC 250/50, a 6-week treatment period allowed sufficient time for clinical changes to be observed.

A target enrollment of approximately 350 male and female subjects was planned to obtain 320 evaluable subjects. Approximately 140 subjects were planned to be randomized to FSC 250/50mcg, 140 subjects to SAL 50mcg and 70 subjects to the placebo treatment arm.

### 4.3. Protocol Amendment(s)

The protocol was amended once on 16 July 2009 for all sites as follows:

Removed inclusion criteria 11, which mandated subjects have access to a telephone landline (wireless and analog transmission of eDiary data was subsequently adopted)

To clarify Screen Failures and Run-In Failures

To add a spirometry assessment to the Premature Discontinuation Visit

To add the Patient Exit Evaluation assessment to Visit 3

To include a description of the Medical Problems/Medications Taken Diary

To clarify text in the sample size and exploratory efficacy analysis sections.

#### 4.4. Selection of Study Population

##### 4.4.1. Inclusion/Exclusion Criteria

Full inclusion/exclusion criteria are provided in Section 4.2 and Section 4.3 of the protocol. Key criteria are detailed below.

##### Key Inclusion Criteria

Subjects eligible for enrolment in the study were required to meet all of the following criteria:

- Males or females (of non-childbearing potential) 40 years of age or older who provided written informed consent to participate and had an established clinical history of COPD in accordance with the definition provided by the American Thoracic Society/European Respiratory Society [Celli, 2004].
- Current or previous smokers with a cigarette smoking history of  $\geq 10$  pack-years. [Number of pack years = (number of cigarettes per day / 20) x number of years smoked (e.g., 10 pack-years is equal to 20 cigarettes per day for 10 years, or 10 cigarettes per day for 20 years)]. Former-smokers were defined as subjects who had discontinued smoking for  $\geq 6$  months prior to Visit 1. Subjects who decided to stop smoking at Visit 1 were not eligible for participation in the study.
- **Severity of Disease:** Subjects with a measured post-albuterol FEV<sub>1</sub>/FVC ratio of  $< 0.70$  at Visit 1 (Visit 1); and subjects with a measured post-albuterol FEV<sub>1</sub>  $\leq 70\%$  of predicted normal at Visit 1 (Visit 1) based on National Health and Nutrition Examination Survey (NHANES) III reference values [Hankinson, 1999].

##### Key Exclusion Criteria

Subjects meeting any of the following criteria were not to be enrolled in the study:

1. Women who were pregnant or lactating.
2. A current diagnosis of asthma or a respiratory disorder other than COPD (e.g., bronchiectasis, sarcoidosis, active tuberculosis, lung fibrosis), including subjects with a diagnosis of alpha-1-antitrypsin deficiency.
3. Subjects with lung-volume reduction surgery or lung transplant within the previous 12 months.
4. Clinically significant abnormalities in chest X-ray, computed tomography scan or ECG/cardiovascular findings not believed to be due to the presence of COPD.
5. Use of the following medications within the defined times of Visit 1:

| Medication                                               | Prior to Visit 1 |
|----------------------------------------------------------|------------------|
| Inhaled short-acting beta <sub>2</sub> -agonists         | 6 hours          |
| Ipratropium or Ipratropium/albuterol combination product | 6 hours          |
| Oral beta-agonists                                       | 48 hours         |
| Long acting beta-agonists (LABA)                         | 48 hours         |
| Theophylline preparations                                | 48 hours         |
| Cromolyn and Nedocromil inhaler                          | 48 hours         |
| Zafirlukast, montelukast, zileuton                       | 48 hours         |
| Tiotropium                                               | 7 days           |
| ICS/LABA combination products                            | 30 days          |
| Inhaled corticosteroids (ICS)                            | 30 days          |
| Oral or parenteral corticosteroids                       | 30 days          |
| Any investigational drug                                 | 30 days          |

6. Subject was receiving treatment with long-term oxygen therapy.
7. Subjects who were medically unable to withhold their albuterol or ipratropium for the six-hour period required prior to administration of questionnaires and spirometry at each study visit.
8. A COPD exacerbation and/or infection of the upper or lower respiratory tract that required treatment with systemic (oral or parenteral) corticosteroids and/or antibiotics that had not resolved within 30 days of Visit 1.

#### 4.4.2. Randomization Criteria

At Visit 2 (prior to randomization), the subject could not have experienced a COPD exacerbation and/or upper or lower respiratory tract infection requiring treatment with systemic (oral or parenteral) corticosteroids and/or antibiotics and/or hospitalization during the run-in period (including Visit 2).

#### 4.4.3. Withdrawal Criteria

Reasons for subject withdrawal included “adverse event”, “lack of efficacy”, “protocol deviation”, “lost to follow-up”, “investigator discretion” and “withdrew consent”. The investigator recorded the primary reason in the electronic case report form (eCRF).

The reason for subject withdrawal was recorded in the eCRF and study source documents.

Any female who became pregnant during the study was withdrawn.

#### 4.5. Treatments

The following double-blinded study medications were manufactured by GSK and provided to the sites by Clinical Trial Supplies of GSK Research and Development:

- Fluticasone propionate (CCI18781)/salmeterol xinafoate (GR33343G) combination product 250/50mcg per inhalation via DISKUS (formulated with lactose), batch numbers 091190419 and 091229977.
- Salmeterol xinafoate (GR33343G) 50mcg per inhalation via DISKUS (formulated with lactose), batch number 091198034.
- Placebo per inhalation via DISKUS (formulated with lactose) batch numbers 071136386 and 071143196.

GlaxoSmithKline Clinical Trial Supplies provided each investigational site with a bulk supply of albuterol for subjects to use as rescue medication. Subjects using ipratropium prior to the screening visit could continue using ipratropium during the study. GSK did not provide ipratropium to those subjects who wished to continue ipratropium during the study.

#### 4.5.1. Investigational Product and Reference Therapy

The contents of the label were in accordance with all applicable regulatory requirements.

Investigational product was stored in a secure area under the appropriate physical conditions for the product. Access to and administration of the investigational product was limited to the investigator and authorized site staff. Investigational product was dispensed or administered only to subjects enrolled in the study and in accordance with the protocol.

No site preparation of the study medications or supplies was needed for this clinical trial.

Under normal conditions of handling and administration, investigational product was not expected to pose significant safety risks to site staff. A Material Safety Data Sheet describing the occupational hazards and recommended handling precautions was provided to site staff if required by local laws or was otherwise available from GSK upon request. All used and unused study drug was returned to GSK (or a designee of GSK) at or before the end of the study.

In addition, any study inhaler that failed to function properly was identified to GSK personnel for return to GSK for testing. Details of the failure were documented in the eCRF. The subject returned the device to the clinic as soon as possible and avoided missing any doses if possible. The site called IVRS and obtained a new treatment pack number for this subject and dispensed a new study medication kit from the site's investigational product supply as instructed by IVRS.

#### 4.5.2. Treatment Assignment

At Visit 1, eligible subjects entered a 2-week run-in period during which they were permitted to use albuterol and/or continue using ipratropium as rescue medication.

At Visit 2, subjects who were eligible for randomization received double-blind medication for six weeks. Subjects were randomized to the FSC combination product 250/50mcg via DISKUS, SAL 50mcg via DISKUS or placebo via DISKUS in a 2:2:1

1  
2  
3 ratio. Subjects were instructed to administer the assigned double-blind medication once  
4 in the morning (1 inhalation) and once in the evening (1 inhalation) approximately 12  
5 hours apart.  
6

7 The first dose of study medication was administered in the clinic at Visit 2. The final  
8 dose of study medication was taken on the day before Visit 3. At Visit 3, subjects were  
9 not to take the morning dose of study medication before attending the clinic visit.  
10

#### 11 12 **4.5.3. Blinding**

13 Study medication taken during the 6-week treatment phase was double-blind. Neither the  
14 subject nor the study physician knew which treatment the subject was receiving.  
15

16  
17 The investigator or treating physician could unblind a subject's treatment assignment  
18 only in the case of an emergency, when knowledge of the study treatment was essential  
19 for the appropriate clinical management or welfare of the subject. Whenever possible,  
20 the investigator was to first discuss options with the GSK Medical Monitor or appropriate  
21 GSK study personnel before unblinding the subject's treatment assignment. If this was  
22 impractical, the investigator was to notify GSK as soon as possible, but without revealing  
23 the treatment assignment of the unblinded subject, unless that information was important  
24 for the safety of subjects in the study. The date and reason for the unblinding was to be  
25 recorded in the appropriate data collection tool.  
26  
27

28  
29 GSK's Global Clinical Safety and Pharmacovigilance (GCSP) staff could unblind the  
30 treatment assignment for any subject with an SAE. If the SAE required that an expedited  
31 regulatory report be sent to one or more regulatory agencies, a copy of the report,  
32 identifying the subject's treatment assignment, was to be sent to clinical investigators in  
33 accordance with local regulations and/or GSK policy.  
34  
35

36 Subjects were withdrawn if their treatment code became unblinded.  
37

#### 38 39 **4.5.4. Prior and Concomitant Medications and Non-Drug Therapies**

40 All concomitant medications taken during the study were recorded in the eCRF. The  
41 minimum requirement was that drug name and the dates of administration were recorded.  
42

43 All COPD medications used within 30 days of Visit 1 and all COPD and non-COPD  
44 medications used during the study run-in and treatment periods were recorded in the  
45 eCRF.  
46  
47

#### 48 49 **4.5.5. Treatment Compliance**

50 In accordance with local regulatory requirements, the investigator, designated site staff,  
51 or head of the medical institution (where applicable) documented the amount of GSK  
52 investigational product dispensed and/or administered to study subjects, the amount  
53 returned by study subjects, and the amount received from and returned to GSK. Product  
54 accountability records were maintained throughout the course of the study.  
55  
56  
57  
58  
59  
60

The total number of doses taken by each subject was calculated from the dose counter start and stop dates for each device used. If a dose counter start count was missing then it was assumed to be 60. Percentage treatment compliance was calculated as  $100 \times (\text{total doses taken} / (2 \times (\text{treatment stop date} - \text{treatment start date} + 1)))$  and categorized as follows:  $< 80\%$ ,  $\geq 80\% - < 100\%$ ,  $100\%$ ,  $> 100\%$  to  $< 110\%$  or  $\geq 110\%$ .

#### 4.6. Compliance with SOBDA Diary Completion

Percentage compliance with SOBDA diary completion was calculated as  $100 \times (\text{number of days for which the SOBDA diary was completed} / \text{number of days between Visit 1 and Visit 3/premature discontinuation- PD})$ .

#### 4.7. Study Assessments and Procedures

Study assessments and procedures are detailed in [Table 6](#) of the study protocol.

##### 4.7.1. Questionnaire Validation and Healthcare Utilization Assessments

Key assessments were:

1. Shortness of Breath with Daily Activities (SOBDA) Questionnaire completed daily by electronic diary
2. Health Care Contact Question and Rescue Use Medication Question completed daily by electronic diary
3. Global Assessment of Shortness of Breath completed daily by electronic diary
4. Patient Global Assessment of Change (PGAC) Question completed weekly by electronic diary
5. Spirometry
  - forced expiratory volume in one second (FEV1)
  - forced vital capacity (FVC)
6. Chronic Respiratory Disease Questionnaire (CRQ-SAS)
7. Clinician Global Assessment of Dyspnea Severity (CGI-S)
8. Clinician Global Impression of Change Question (CGI-C)
9. Patient-completed and clinician-completed Modified Medical Research Council Dyspnea Scale (mMRC)
10. Patient Exit Evaluation questions at the completion of the study

Descriptions of the key study assessments are provided in Section 6.4.1 – Section 6.4.9 of the study protocol, and a full description of the timing and conduct of these assessments are provided in the respective Study Procedure Manuals (SPMs).

#### 4.7.2. Safety Assessments

Safety was monitored/assessed by AE, SAE and COPD exacerbation reporting. Definitions for AEs and SAEs and COPD exacerbations with reporting timelines are provided in Section 6.6 of the protocol.

Any abnormal laboratory test result (hematology, clinical chemistry, or urinalysis) or other safety assessment (e.g., vital signs measurements, physical exams), including those that worsened from Screening, and felt to be clinically significant in the medical and scientific judgment of the investigator, were recorded as AEs or SAEs.

#### 4.8. Data Quality Assurance

For this study, subject data were entered into GSK-defined electronic case report forms (eCRFs), transmitted electronically to GSK, and combined with data provided from other sources (e.g. diary data, laboratory data) in a validated data system.

Clinical data management was performed in accordance with applicable GSK standards and data cleaning procedures with the objective of removing errors and inconsistencies in the data which would otherwise impact on the analysis and reporting objectives, or the credibility of the Clinical Study Report. AEs and concomitant medications terms were coded using the Medical Dictionary for Regulatory Affairs (MedDRA) and GSKDrug, an internal validated medication dictionary. In all cases, subject initials were not collected nor transmitted to GSK.

#### 4.9. Statistical Analyses

A detailed description of statistical analyses for this study can be found in the Reporting and Analysis Plan (RAP). Analyses were performed using SAS version 9.1.3 on a UNIX platform. Graphics were produced using SAS and S-PLUS version 7 for Windows.

##### 4.9.1. Timings of Planned Analyses

All planned analyses were performed after the database had been frozen and subjects were unblinded. No interim analyses were planned or conducted.

##### 4.9.2. Sample Size Considerations

Sample size calculations were based on evaluation of the responsiveness of the SOBDA questionnaire. The sample size allows for comparison of SOBDA change scores for responders and non-responders (defined according to other study assessments as described in the RAP).

Sample size calculations assumed 90% power, a two-sided 5% significance level, and a standardized between-groups effect size of 0.5 (defined as the difference between responders and non-responders divided by the standard deviation of the difference). Under these assumptions, a minimum of 172 evaluable subjects was required. The effect



size of 0.5 is proposed to represent a moderate responsiveness, while an effect size of 0.8 is proposed to represent large responsiveness [Cohen, 1988; Kazis, 1989]. This sample size was increased to allow the exploratory comparison of SOBDA scores between active treatments. With the above assumptions and assuming a randomization ratio of 2:1 for active treatments: placebo, 128 evaluable subjects for FSC 250/50mcg and SAL 50mcg and 64 evaluable subjects for placebo were required (total of 320). Assuming that 90% of randomized subjects would provide data for this comparison, approximately 140 subjects were planned to be randomized to FSC 250/50mcg and SAL 50mcg, and 70 to placebo. Therefore approximately 350 subjects were planned to be randomized to provide 320 evaluable subjects. No sample size review was planned or conducted for this study.

#### 4.9.3. Analysis Populations

Three subject populations were identified:

##### All Subjects Enrolled Population

This population comprised all subjects who were screened or who completed written informed consent and experienced an SAE before the planned Visit 1 date. It was used for the tabulation and listing of reasons for screen failure and listings of COPD exacerbations and serious adverse events (SAEs) for non-randomized subjects.

##### Run-in Population

This population comprised all subjects who completed Visit 2, including those who were not randomized, were randomized but did not receive a dose of study medication and those who were randomized and received study medication. It was used for comparisons of Visit 1 and 2 data as part of the assessment of measurement properties of the SOBDA questionnaire, and for the tabulation and listing of reasons for run-in failure and summaries of demographic and baseline characteristics, questionnaire validation and healthcare utilization data, and also for summaries of pre-treatment adverse events.

This was an additional population from those specified in the protocol and was included so that all subjects who provided data for Visit 1 and Visit 2 could be included in any comparisons of those data.

##### Modified Intent-to-treat Population

This population comprised all subjects randomized to treatment who received at least one dose of study medication. Randomized subjects were assumed to have received study medication unless definitive evidence to the contrary existed. A true Intent-to-treat analysis would use the randomized treatment, but analyses on this population were 'modified' in that all data summaries and analyses were based on the actual treatment received, if it was different to the randomized treatment. This constituted the primary population for exploratory analyses of SOBDA scores by treatment.

If any subject received more than one treatment during the study, their data was to be reported according to the treatment they received for the longest period of time. A listing showing actual treatments received was to be produced.

#### **4.9.4. Comparisons of Interest**

##### **4.9.4.1. Assessment of Measurement Properties**

This section was modified from the protocol following the issue of the final FDA Guidance on ‘Patient-Reported Outcome Measures: Use in Medical Product Development to Support Labeling Claims’ (FDA, 2009). The protocol was based on the previous draft guidance, and analysis was updated to more closely follow the final guidance.

##### ***Consistency and validity***

The internal consistency of the SOBDA questionnaire was assessed and summary scores were compared with other endpoints collected, to confirm the reliability and validity of the instrument.

##### ***Responsiveness***

The responsiveness of the SOBDA questionnaire was assessed by comparing score changes between responders and non-responders. A responder was defined as a subject who had a response of ‘better’ or ‘much better’ (score of 4 or 5) on the weekly PGAC assessment. This comparison was repeated defining a responder as a subject who had a response of ‘better’ or ‘much better’ (score of 4 or 5) on the CGI-C at Visit 3.

Similar comparisons were performed for the CRQ-SAS dyspnoea domain score and the patient- and clinician-completed mMRC assessments and results compared with those from the SOBDA questionnaire comparisons.

##### ***Establish threshold for SOBDA responders and MID***

Anchor-based methods, distribution-based methods and examination of the cumulative proportions of responders and non-responders were all used to establish the threshold for SOBDA responders and the MID.

##### **4.9.4.2. Efficacy**

Summary measures for SOBDA score were compared between each active treatment and placebo. Formal comparisons between active treatments (i.e. between FSC and SAL) were not performed.

#### 4.9.5. General Considerations for Data Analyses

All programming was performed in a HARP environment using SAS Version 9.1.3.

#### 4.9.6. Multicentre Studies

Treatment by centre interaction was not formally investigated. Summaries and analyses were performed for all centres combined.

#### 4.9.7. Other Strata and Covariates

No stratification was applied in this study. Covariates to be used in statistical models are outlined in Section 11 and Section 12 of the RAP.

#### 4.9.8. Examination of Subgroups

No sub-groups of the populations were analysed, except as detailed in Section 11 of the RAP.

#### 4.9.9. Multiple Comparisons and Multiplicity

All statistical analyses were considered exploratory and no formal hypothesis tests were performed. No adjustment was made for multiplicity.

#### 4.9.10. Data Handling Conventions

Full details of analysis considerations and handling conventions can be found in the RAP Section 9.

#### 4.9.11. Study Population

Summaries of subject disposition, protocol deviations, demographic and baseline characteristics, and treatment compliance are described in the RAP Section 10.

#### 4.9.12. Assessment of Measurement Properties

Detailed statistical methods are provided in the RAP Section 11.

#### 4.9.13. Exploratory Efficacy Analyses

Details of the exploratory efficacy analyses are provided in the RAP Section 12.

#### 4.9.14. Safety Analyses

Detailed statistical methods are provided in the RAP Section 13.

## 5. STUDY POPULATION RESULTS

This was a study conducted in the US only and sponsored by GSK; a total of 40 centers in the United States randomized subjects to treatment (Table 1.06).

### 5.1. Subject Disposition

#### 5.1.1. Screen and Run-in Failures

Subject accountability for the total population is summarized in Table 1. Any subject who had at least one study procedure performed (in addition to signing a consent form), was assigned a subject number but who did not enter the run-in period was considered a screening failure. Additionally, if a subject completed written informed consent and experienced a SAE before the planned Visit 1 date, the subject was classified as a screen failure. The most common reason for screen failure was failure to meet inclusion/exclusion criteria. Run-in failures (subjects who entered the run-in period but then failed to be randomized, or who were randomized but did not receive a dose of study medication) were low (52 subjects, 12%, Table 1.04).

**Table 1 Screen Failures (ASQ112989 All Subjects Enrolled Population)**

| Screening Status                          | Number (%) of Subjects<br>Total N=547 |
|-------------------------------------------|---------------------------------------|
| Entered run-in                            | 418 (76)                              |
| Failed                                    | 129 (24)                              |
| Reasons for Screen Failure:               |                                       |
| Exacerbation                              | 1 (<1)                                |
| Did not meet inclusion/exclusion criteria | 126 (23)                              |
| Adverse event (unspecified)               | 0                                     |
| Investigator discretion                   | 1 (<1)                                |
| Withdrew consent                          | 1 (<1)                                |

Source: Table 1.03

The summary of inclusion/exclusion/randomization criteria deviations for screen/run-in failures (all subjects population) is given in Table 1.07. Severity of disease (102 subjects, 19%) was the most common inclusion criteria deviation, followed by absence of significant dyspnea by mMRC (13 subjects, 2%). The most common randomization criteria deviation was COPD exacerbation (21 subjects, 4%). All other deviations occurred in <1% of subjects.

In the modified intent-to-treat (mITT) population, less than 1% of subjects experienced inclusion /exclusion or randomization criteria deviations (Table 1.08).

## 5.1.2. Randomized Subjects

### 5.1.2.1. Study completion and withdrawal (all subjects)

A total of 366 subjects were randomized to treatment. One subject refused to take his study medication so a total of 365 subjects received treatment. There was not a significant difference in the percentage of withdrawals between subjects in the FSC 250/50 group compared with subjects in the SAL group or placebo (Table 2). The percentage of subjects receiving FSC 250/50 who withdrew from the study was similar to the percentage of subjects receiving SAL 50. The majority of subjects (>99%) completed either Visit 3 or the Premature Discontinuation visit as stipulated by the protocol (Table 1.02).

**Table 2 Summary of Subject Disposition (ASQ112989 mITT Population)**

| Completion status n(%)            | Placebo<br>(n=75) | SAL<br>50mcg bid<br>(n=151) | FSC<br>250/50mcg bid<br>(n=139) | Total<br>(n=365) |
|-----------------------------------|-------------------|-----------------------------|---------------------------------|------------------|
| Completed                         | 69 (92)           | 141 (93)                    | 126 (91)                        | 336 (92)         |
| Withdrawn                         | 6 (8)             | 10 (7)                      | 13 (9)                          | 29 (8)           |
| Primary*/subreason for withdrawal |                   |                             |                                 |                  |
| Adverse event                     | 3(4)              | 3 (2)                       | 7 (5)                           | 13(4)            |
| Lack of efficacy                  | 2 (3)             | 0                           | 1 (<1)                          | 3 (<1)           |
| Protocol deviation                | 0                 | 0                           | 4 (3)                           | 4 (1)            |
| Study closed/terminated           | 0                 | 1 (<1)                      | 0                               | 1 (<1)           |
| Lost to follow-up                 | 0                 | 0                           | 0                               | 0                |
| Investigator discretion           | 0                 | 0                           | 0                               | 0                |
| Withdrew consent                  | 1 (1)             | 6 (4)                       | 1 (<1)                          | 8 (2)            |

\*Subjects may have only one primary reason for withdrawal  
Source: Table 1.05

## 5.2. Protocol Deviations

Protocol deviations considered to be major are defined in Section 9.2.1 of the RAP. A total of 26 subjects (7% of the mITT population) had major protocol deviations, with 14 (9%) of these occurring in the SAL 50 group and 9 (6%) occurring in the FSC 250/50 group. Three placebo subjects (4%) experienced major protocol deviations. Violation of an inclusion or exclusion criterion was considered a major protocol deviation in 1% of subjects or less in any group, and the most common major protocol deviation across all three groups was receipt of a prohibited medication within specified timeframes. A summary of protocol deviations is presented in Table 1.09, but all analyses were performed on the mITT population, which did not exclude subjects with protocol deviations.

The study blind was not broken during the study.

### 5.3. Populations Analyzed

Three subject populations were identified as previously described in Section 4.9.3. The distribution of subjects in each of these populations is provided in Table 3. The data summarized for the run-in population is grouped by run-in failures, subjects randomized to each of the three treatment groups and the total.

**Table 3 Summary of Subject Populations**

| Population                         | Placebo  | SAL<br>50mcg BID | FSC<br>250/50mcg BID | Total     |
|------------------------------------|----------|------------------|----------------------|-----------|
| All subjects enrolled              |          |                  |                      | 547       |
| Run-in                             |          |                  |                      | 418       |
| Randomized                         | 75       | 152              | 139                  | 366       |
| Modified intent-to-treat [1] n (%) | 75 (100) | 151 (<99)        | 139 (100)            | 365 (>99) |

Note: One subject was randomized to SAL 50mcg but refused to take his study medication and is therefore excluded from the mITT population.

1. Percentages are based on the number of subjects randomized.

Source: Table 1.01

### 5.4. Demographics and Baseline Characteristics

For the Run-in population, a slightly higher percentage of subjects were male (57%) than female (43%); the overall mean age was 61.1 years and the overall mean BMI was 28.28 kg/m<sup>2</sup>. A majority of subjects (>99%) were not of Hispanic or Latino ethnicity and the majority of subjects (90%) were white (Table 4).

**Table 4 Summary of Demographics (ASQ112989 Run-in Population)**

|            |                                       | Run-in<br>Failure<br>(N=52) | Placebo<br>(N=75) | SAL<br>50mcg bid<br>(N=152) | FSC<br>250/50mcg bid<br>(N=139) | Total<br>(N=418) |
|------------|---------------------------------------|-----------------------------|-------------------|-----------------------------|---------------------------------|------------------|
| Age (yrs)  | n                                     | 52                          | 75                | 152                         | 139                             | 418              |
|            | Mean                                  | 63.8                        | 62.8              | 60.1                        | 60.2                            | 61.1             |
|            | Sd                                    | 9.61                        | 9.82              | 9.58                        | 9.45                            | 9.65             |
| Sex        | Female                                | 27 (52)                     | 29 (39)           | 63 (41)                     | 60 (43)                         | 179 (43)         |
|            | Male                                  | 25 (48)                     | 46 (61)           | 89 (59)                     | 79 (57)                         | 239 (57)         |
| Ethnicity  | Hispanic or latino                    | 0                           | 0                 | 1 (<1)                      | 1 (<1)                          | 2 (<1)           |
|            | Not hispanic or latino                | 52 (100)                    | 75 (100)          | 151 (>99)                   | 138 (>99)                       | 416 (>99)        |
|            | African American/<br>African Heritage | 8 (15)                      | 9 (12)            | 12 (8)                      | 12 (9)                          | 41 (10)          |
|            | White                                 | 44 (85)                     | 65 (87)           | 140 (92)                    | 127 (91)                        | 376 (90)         |
|            | Asian                                 | 0                           | 1 (1)             | 0                           | 0                               | 1 (<1)           |
| Bmi (kg/m) | n                                     | 51                          | 75                | 152                         | 139                             | 417              |
|            | Mean                                  | 28.25                       | 26.55             | 28.45                       | 29.04                           | 28.28            |
|            | Sd                                    | 6.897                       | 6.131             | 6.159                       | 7.307                           | 6.680            |

Source: Table 1.10 and Table 1.11

#### 5.4.1. Current Medical Conditions

Current medical conditions were summarized for the run-in population and were similar between the run-in failures, the two treatment groups and placebo (Table 1.13). In total, most subjects (409 subjects- 98%) reported a current medical condition. For the treatment groups, the number of subjects having any condition was 138 (>99%) in the FSC 250/50 group, 149 (98%) in the SAL 50 group and 73 (97%) in the placebo group. The most commonly reported conditions across all groups were in the musculoskeletal and connective tissue disorders system organ class (SOC), ranging from 63-68% across groups (66% total). The second most common SOC was the cardiac disorders group, with conditions being reported by 50-67% of subjects (63% total), followed by the gastrointestinal disorders SOC, ranging from 35-47% (43% total). Respiratory, thoracic and mediastinal conditions were reported by 36-58% of subjects across the individual groups (41% total).

#### 5.4.2. Past Medical Conditions

The incidence of past medical conditions was similar between the run-in failure group, the two treatment groups and placebo (Table 1.14). Past medical conditions were reported by a total of 260 (62%) of subjects. For the treatment groups, the number of subjects having any condition was 91 (65%) in the FSC 250/50 group, 94 (62%) in the SAL 50 group and 43 (57%) in the placebo group.

The most commonly reported past medical conditions across all groups were in the reproductive system and breast disorders SOC, ranging from 19-29% across groups (24% total). The second most common SOC was the neoplasms (benign, malignant and unspecified) SOC, with conditions being reported by 13-19% of subjects (18% total). All other past medical conditions were reported in less than 10% of the total population in the SOCs summarized.

#### 5.4.3. COPD History and Exacerbation History

In the run-in population, the duration of COPD was  $\geq 1$  to  $< 5$  years for 141 (34%) of subjects and  $\geq 5$  to  $< 10$  years for 121 (29%) of subjects. Forty-six subjects (11%) reported a duration of  $\geq 10$  to  $< 15$  years and 15% percent of subjects had COPD histories of  $< 1$  year. The duration of COPD was similar between the treatment groups, ranging from 33-36% ( $\geq 1$  to  $< 5$  years), 27-31% ( $\geq 5$  to  $< 10$  years) and 11-22% for  $< 1$  year.

A slightly higher percentage of the run-in population (66%) was reported as having emphysema compared with 58% of subjects with reported chronic bronchitis: 65-69% across treatment groups (Table 1.15).

Most subjects (had not experienced an exacerbation within the 12 months prior to Visit 1. During this period, 9% subjects had experienced at least one exacerbation that was managed without extra medication and did not require hospitalization, 13% subjects experienced at least one exacerbation that required oral/systemic corticosteroids and/or antibiotics but did not require hospitalization, and 5% subjects experienced at least one exacerbation that required hospitalization (Table 1.16).

#### 5.4.4. Smoking History

Fifty-seven percent of run-in failures and 60-65% of subjects in the treatment groups were current smokers. The total mean number of years smoked for the Run-in population was 39.5 (SD=10.36) and was similar between Run-in failures and the treatment and placebo groups (Table 1.17).

The protocol inclusion required a history of smoking of at least 10 pack-years, and the mean number of pack years smoked ranged from 53.2 to 57.8 years (54.9 mean pack year history for the Run-in population).

#### 5.4.5. Lung Function

Pulmonary function was assessed at screening and demonstrated the physiologic features of COPD in the subject population. Reversibility was low, as was expected for this subject population. The results of the key pulmonary function tests performed at screening are summarized in Table 5.

**Table 5 Summary of Pulmonary Function at Screening (ASQ112989 mITT Population)**

| Mean Values                          | Run-in Failure<br>N=52 | Placebo<br>N=75 | SAL 50<br>N=152 | FSC 250/50<br>N=139 | Total<br>N=418 |
|--------------------------------------|------------------------|-----------------|-----------------|---------------------|----------------|
| FEV <sub>1</sub> (L) <sup>1</sup>    | 1.425                  | 1.469           | 1.536           | 1.532               | 1.509          |
| FEV <sub>1</sub> % Predicted         | 50.3                   | 49.4            | 50.2            | 49.5                | 49.9           |
| Reversibility to albuterol (%)       | 8.6                    | 16.7            | 11.7            | 14.5                | 13.1           |
| FVC (L) <sup>1</sup>                 | 2.771                  | 2.873           | 2.956           | 2.863               | 2.887          |
| FEV <sub>1</sub> /FVC % <sup>1</sup> | 55.7                   | 51.6            | 52.2            | 53.7                | 53.0           |

1. Post-albuterol  
Source: Table 1.18

#### 5.5. Prior and Concomitant Medications

Verbatim concomitant medication terms were coded to a dictionary term and grouped to an ATC class.

##### 5.5.1. COPD Medications

##### 5.5.1.1. COPD Medications before Run-In

In the Run-in Population, COPD medications were taken before the run-in by 77% of subjects. The most frequently reported COPD medications taken before the run-in were salbutamol (50% total), followed by ipratropium bromide (19% total) and salbutamol sulphate (17% total). Tiotropium bromide was taken by a total of 16% of subjects. All other medications were taken by less than 10% of the total number of subjects (Table 1.19).



### 5.5.1.2. COPD Medications during Run-In

Concomitant COPD medications were taken during the run-in period by 27% subjects in the Run-in population (Table 1.20). The most common concomitant COPD medications used were salbutamol (10% total, 8% to 12% across groups) and ipratropium bromide (9% total, 6% to 11% across groups). All other medications were taken by less than 5% of subjects.

### 5.5.1.3. COPD Medications during Study Treatment Period

In the mITT population, concomitant COPD medications were taken during the treatment period by 23% subjects in the FSC 250/50 group and 26% subjects in the SAL 50 group, compared with 24% of subjects in the placebo group (Table 1.21). The most common concomitant COPD medications used were ipratropium bromide (7 to 11% of subjects) and salbutamol (5 to 11% of subjects). Study-provided salbutamol is not recorded in this table. All other medications were taken by less than 10% of subjects in any treatment group. The percentage of subjects taking any concomitant COPD medications during the treatment period was similar between the treatment groups.

### 5.5.1.4. COPD Medications after Study Treatment Period

In the mITT population, COPD medications were taken after the treatment period by 50% subjects in the FSC 250/50 group and 52% subjects in the SAL 50 group compared with 51% of placebo subjects (Table 1.22). The most common concomitant COPD medications used were salbutamol, ipratropium bromide and tiotropium bromide. All other medications were taken by less than 10% of subjects in any group.

## 5.6. Exposure and Treatment Compliance

Treatment exposure for placebo, FSC 250/50 and SAL 50 is provided in Table 6. The duration of exposure to study medication was similar in each treatment group: mean (range) was 40 (1 to 55) days in the placebo group and 39.7 (1 to 52) days in the FSC 250/50 group and 40.5 (3 to 47) days in the SAL 50 group.

The majority of subjects were compliant with few subjects missing their doses or taking extra doses, and the mean overall percentage compliance for the mITT population was  $\geq 96.3\%$  (Table 1.26). No inhaler malfunctions were reported (Table 1.27).

**Table 6 Summary of Exposure to Study Drug (ASQ112989 mITT Population)**

|                              |            | Placebo<br>(N=75) | SAL 50mcg<br>(N=151) | FSC 250/50mcg<br>(N=139) |
|------------------------------|------------|-------------------|----------------------|--------------------------|
| Exposure (days) <sup>1</sup> | n          | 75                | 151                  | 139                      |
|                              | Mean       | 40.0              | 40.5                 | 39.7                     |
|                              | SD         | 8.18              | 6.04                 | 7.75                     |
|                              | Median     | 42.0              | 42.0                 | 42.0                     |
|                              | Min        | 1                 | 3                    | 1                        |
|                              | Max        | 55                | 47                   | 52                       |
| Range of exposure n(%)       | ≤7 days    | 2 (3)             | 1 (<1)               | 3 (2)                    |
|                              | 8-14 days  | 1 (1)             | 2 (1)                | 2 (1)                    |
|                              | 15-28 days | 2 (3)             | 6 (4)                | 5 (4)                    |
|                              | 29-42 days | 61 (81)           | 110 (73)             | 101 (73)                 |
|                              | >42 days   | 9 (12)            | 32 (21)              | 28 (20)                  |

1. Calculated as ((date of last dose- date of first dose) +1)  
Source: Table 4.01

## 6. ASSESSMENT OF MEASUREMENT PROPERTIES

The intent of the psychometric analyses conducted using data from this study was confirmatory, with the exception of the assessment of responsiveness and the establishment of a responder threshold. The SOBDA score used in these analyses is the score determined by the final 13-item SOBDA scoring algorithm, in which the subject is assigned a weekly mean SOBDA score ranging from 1-4 (greater scores indicating more severe breathlessness with daily activities) based on the mean of seven days of data (at least four of seven days must be complete for a weekly mean to be calculated), and each daily total score is computed from the mean of the scores on the 13 items (at least 7 out of 13 items must have non-missing response options for a daily mean to be calculated).

### 6.1. Reliability

#### 6.1.1. Internal Consistency

The internal consistency of the SOBDA total score on Day 1 was assessed using Cronbach's formula for coefficient alpha. Internal consistency is reported in Table 2.01. At Day 1 of the run-in period, the Cronbach's alpha value for the SOBDA total score was 0.89 for subjects with a score for each SOBDA item (n=344).

#### 6.1.2. Test-retest Reliability

Data from subjects whose breathlessness, as measured by the second weekly Patient Global Assessment of Change (PGAC), was classified as unchanged over the preceding seven days was used to estimate the test-retest reliability of the SOBDA total score between Week 1 and Week 2 of the Run-in. Reproducibility of the SOBDA was assessed

1  
2  
3 primarily through paired t-tests, Pearson's correlation and intraclass correlation  
4 coefficients.

5  
6 Test-retest reliability of SOBDA scores for 152 subjects with weekly SOBDA scores at  
7 Run-in Week 1 and Run-in Week 2 and reporting no change on the second weekly  
8 PGAC, i.e. on the day of or prior to Visit 2, are shown in Table 2.02. Pearson's  
9 correlation values and ICCs were both 0.94 and the effect size 0.01. A scatter plot of  
10 Week 1 Run-in versus Week 2 Run-in SOBDA scores among subjects with a response of  
11 'no change' on the second weekly PGAC is shown in Figure 2.01.  
12  
13

## 14 **6.2. Validity**

15  
16  
17 Validity refers to the extent to which the instrument measures what it is intended to  
18 measure.  
19

### 20 **6.2.1. Convergent Validity**

21  
22  
23 In this study, the relationship between SOBDA scores and selected patient-reported and  
24 clinical assessments of dyspnea severity or constructs hypothetically related to dyspnea  
25 severity were examined for convergent validity.  
26  
27

#### 28 **6.2.1.1. Relationship between SOBDA Scores and mMRC Score**

29  
30 Correlations between mean baseline SOBDA scores and mMRC scores at Visit 2 are  
31 reported in Table 2.03. The Spearman rank order correlation coefficients were 0.29 for  
32 patient-reported scores, and 0.24 for clinician-reported scores. Scatter plots of Visit 2  
33 clinician- and patient-mMRC scores compared with SOBDA baseline scores are shown  
34 in Figure 2.02 and Figure 2.03, respectively.  
35  
36

#### 37 **6.2.1.2. Relationship between SOBDA and CRQ-SAS Dyspnea Domain and CGI-S**

38  
39  
40 The relationship between baseline SOBDA scores and subjects' reports, using the  
41 Chronic Respiratory Disease Questionnaire (CRQ-SAS) dyspnea domain score at Visit 2  
42 was assessed via Pearson's correlation coefficient. Correlations with the CRQ-SAS  
43 dyspnea domain are expected to be negative since increasing symptom burden is  
44 associated with higher SOBDA scores but with lower CRQ-SAS scores. The relationship  
45 between baseline SOBDA scores and the Clinician Global Impression of Dyspnea  
46 Severity (CGI-S) at Visit 2 was assessed via Spearman's rank order correlation  
47 coefficient.  
48  
49

50  
51 Correlation coefficients for the relationship between SOBDA baseline score and the  
52 CRQ-SAS dyspnea domain and CGI-S are shown in Table 2.03. Correlation with the  
53 CRQ-SAS dyspnea domain score was -0.68, exceeding the predicted value of -0.30.  
54 Correlation with the CGI-S was 0.24, approaching but not meeting the test criteria.  
55 Scatter plots of CRQ-SAS dyspnea scores and CGI-S scores at Visit 2 compared with  
56 baseline SOBDA scores are shown in Figure 2.04 and Figure 2.05, respectively.  
57  
58  
59  
60

## 6.2.2. Known Group Validity

Known group validity refers to the extent to which scores from an instrument differentiate groups of subjects that are known to differ on the underlying construct. In the case of the SOBDA, the instrument should differentiate subjects with varying levels of dyspnea severity.

### 6.2.2.1. Discrimination by mMRC Rating – Clinician and Patient

A comparison of SOBDA baseline scores by Visit 2 mMRC ratings (obtained separately from clinician and subject) was conducted using ANCOVA models that adjusted for age, sex, and FEV<sub>1</sub> % predicted measured during the screening visit (Table 2.05 and Table 2.07). Least Square (LS) mean SOBDA baseline scores were found to increase as mMRC clinician and patient ratings increased. Better discrimination in SOBDA score was observed using mMRC patient ratings compared with mMRC clinician ratings.

### 6.2.2.2. Discrimination by CGI-S Rating

A comparison of baseline SOBDA scores by Visit 2 CGI-S ratings was also conducted using ANCOVA models adjusting for age, sex, and screening FEV<sub>1</sub>% predicted (data summary and analyses shown in Table 2.08 and Table 2.09, respectively). As CGI-S categories increased in severity, SOBDA scores also increased.

## 6.3. Responsiveness

### 6.3.1. SOBDA Weekly Score Analysis by Patient Global Assessment of Change

ANCOVA was used to compare changes from the previous week to the current week's SOBDA score during the six-week study treatment period in responders and non-responders, defined according to the corresponding weekly PGAC assessment. Responders were defined as subjects with a rating of "better" or "much better" on the PGAC at the relevant week; non-responders were defined as subjects with a response of "much worse", "worse" or "no change" on the PGAC. The difference between responders and non-responders in the change from the previous week to the current week's SOBDA score was tested using ANCOVA, controlled for age, sex, and the previous week's SOBDA score. These analyses were repeated using patient global assessment of change ratings at Days 8, 15, 22, 29, 36 and 43. Weekly SOBDA change scores were lower for PGAC responders compared with PGAC non-responders (Table 7). Weekly SOBDA change scores between groups were statistically significant each week with the exception of Week 6. However, it is noted that about half of subjects did not complete the PGAC at Day 43.

**Table 7 SOBDA Change Score Analysis by Weekly PGAC**

|                                         | Day 8                | Day 15               | Day 22               | Day 29               | Day 36               | Day 43*               |
|-----------------------------------------|----------------------|----------------------|----------------------|----------------------|----------------------|-----------------------|
| Responders (n) <sup>1</sup>             | 105                  | 91                   | 83                   | 62                   | 77                   | 31                    |
| Non-responders (n) <sup>2</sup>         | 188                  | 212                  | 216                  | 223                  | 200                  | 88                    |
| Mean difference between groups (95% CI) | 0.24<br>(0.18, 0.31) | 0.12<br>(0.06, 0.19) | 0.11<br>(0.06, 0.16) | 0.11<br>(0.06, 0.17) | 0.13<br>(0.08, 0.18) | 0.06<br>(-0.03, 0.15) |
| p-value <sup>3</sup>                    | <0.001               | <0.001               | <0.001               | <0.001               | <0.001               | 0.180                 |

1. Subjects with a rating of "better" or "much better" on the PGAC.
2. Subjects with a response of "much worse", "worse" or "no change" on the PGAC.
3. Comparison of change from previous to current week's SOBDA scores for responders and non-responders, based on ANCOVA adjusted for age, sex and previous week's SOBDA score.

\* Not all subjects completed PGAC at Day 43

NOTE: Lower SOBDA scores indicate less shortness of breath with daily activities

Source: Table 2.11, Table 2.13, Table 2.15, Table 2.17, Table 2.19, and Table 2.21

### 6.3.2. SOBDA Last Treatment Week Score Analysis

ANCOVA was used to compare changes in mean SOBDA scores during the last week of treatment in responders and non-responders controlling for age, sex, and the baseline week SOBDA score. Analyses were conducted using definitions of responders and non-responders based on the PGAC, Clinician Global Impression of Change (CGI-C), CRQ-SAS dyspnea domain, clinician-completed mMRC and patient-completed mMRC conducted at Visit 3 or Premature Discontinuation.

Analysis of SOBDA last treatment week scores by PGAC response at Visit 3/PD is shown in Table 2.23. PGAC responders were defined as subjects with a rating of "better" or "much better" on the PGAC; non-responders were defined as subjects with a response of "much worse," "worse" or "no change" on the PGAC. The difference between responders (n=45) and non-responders (n=106) was not statistically significant but the change from baseline to SOBDA last treatment week score change was numerically lower for responders (lower SOBDA scores indicate less shortness of breath with daily activities). About half of the subjects did not complete the PGAC at Visit 3/PD owing to a logistical oversight at the sites, where the PGAC was not administered as instructed on the electronic device at the final visit.

Analysis of SOBDA last treatment week scores by CGI-C response at Visit 3/PD is shown in Table 2.25. A CGI-C responder was defined as a subject who had a response of "better" or "much better," and a non-responder was defined as a subject who had a response of "much worse," "worse" or "no change." The difference in change from baseline to SOBDA last treatment week score was significantly lower for CGI-C responders (n=120) versus non-responders (n=181) (difference=0.24, p<0.001). Figure 2.06 shows the difference in mean SOBDA scores across six weeks of treatment for CGI-C responders and non-responders.

1  
2  
3 Analysis of SOBDA last treatment week scores by the CRQ-SAS dyspnea domain at  
4 Visit 3/PD is shown in Table 2.27. A CRQ-SAS dyspnea domain responder was defined  
5 as a subject who had a score increase of 0.5 units or more for the dyspnea domain of the  
6 CRQ-SAS between Visit 2 and Visit 3/PD. A non-responder was defined as a subject  
7 who had a decrease in score, or an increase of less than 0.5 units. The difference in  
8 change from baseline to SOBDA last treatment week score was significantly lower for  
9 CRQ-SAS responders (n=117) versus non-responders (n=184) (difference=0.30,  
10 p<0.001). Figure 2.07 shows the difference in mean SOBDA scores across six weeks of  
11 treatment for CRQ-SAS dyspnea domain responders and non-responders.  
12  
13

14 Analysis of SOBDA last treatment week scores by clinician-rated mMRC response at  
15 Visit 3/PD is shown in Table 2.29. A clinician-completed mMRC responder was defined  
16 as a subject who had a score decrease of one unit or more between Visit 2 and Visit 3/PD.  
17 A non-responder was defined as a subject who had the same or an increase in score. The  
18 difference in SOBDA last treatment week score for responders (n=91) versus non-  
19 responders (n=210) was not statistically significant (difference=0.03; p=0.535). Figure  
20 2.08 shows the difference in mean SOBDA scores across six weeks of treatment for  
21 clinician-rated responders and non-responders.  
22  
23

24 Analysis of SOBDA last treatment week scores by patient-rated mMRC response at Visit  
25 3/PD is shown in Table 2.31. A patient-completed mMRC responder was defined as a  
26 subject who had a score decrease of one unit or more between Visit 2 and Visit 3/PD. A  
27 non-responder was defined as a subject who had the same or an increase in score. The  
28 difference in SOBDA last treatment week score for responders (n=92) and versus non-  
29 responders (n=209) was not statistically significant (difference=0.08; p=0.129). Figure  
30 2.09 shows the difference in mean SOBDA scores across six weeks of treatment for  
31 patient-rated mMRC responders and non-responders.  
32  
33  
34  
35

#### 36 **6.4. Threshold for SOBDA Responders and Minimally Important** 37 **Difference**

38  
39 The thresholds for defining a responder using the SOBDA were explored using the  
40 modified intent to treat population. Anchor-based methods were used to establish a  
41 preliminary minimally important difference (MID) for SOBDA mean score changes  
42 within a subject, which was also considered the threshold for SOBDA responders to  
43 allow comparison of proportions of responders in different categories.  
44  
45

##### 46 **6.4.1. SOBDA Weekly Scores**

47  
48 The on-treatment SOBDA weekly summary scores and the change from the previous  
49 week's score were summarized for each level of PGAC response. The changes in  
50 SOBDA scores from baseline to Week 1 (using the Week 1 PGAC grouping), Week 1 to  
51 Week 2 (using the Week 2 PGAC grouping); Week 2 to Week 3 (using the Week 3  
52 PGAC grouping); Week 3 to Week 4 (using the Week 4 PGAC grouping); Week 4  
53 Week 5 (using the Week 5 grouping); and Week 5 to Week 6 (using the Week 6 grouping) were  
54 summarized. Mean, SD, median, minimum and maximum change in SOBDA scores  
55 from the previous week are presented in Table 2.32- Table 2.37. The mean change in  
56 SOBDA scores from the previous week among subjects who rated their condition as  
57  
58  
59  
60

“better” using the PGAC were -0.26 at Week 1, -0.08 at Week 2, -0.08 at Week 3, -0.10 at Week 4, -0.08 at Week 5, and -0.05 at Week 6.

The change in score from the previous week’s to the current week’s SOBDA weekly score (x-axis) were plotted against the cumulative proportion of subjects who show such change (y-axis), with a line for each of the responses to the corresponding PGAC assessment (Figure 2.10- Figure 2.15).

#### 6.4.2. SOBDA Last Treatment Week Score

The change in SOBDA scores from baseline to last treatment week were summarized by CGI-C groupings at Visit 3/PD (Table 2.38), CRQ-SAS dyspnea domain groupings (see Section 6.3.2 for categories) at Visit 3/PD (Table 2.39), and FEV1 groupings at Visit 3/PD (Table 2.40) (for FEV1, subjects were grouped as "No change or worse" if they had a change from baseline of <50mL, "Better" if they had a change of 50-<100mL, and "Much better" if they had a change of ≥100mL).

Subjects who were classified as “better” based on the CGI-C, CRQ-SAS dyspnea domain, and FEV1 had a mean change score on the SOBDA of -0.25, -0.13, and -0.16, respectively, at the last treatment week compared to baseline.

For each anchor (CGI-C, CRQ-SAS dyspnea domain and FEV1), the change from baseline in the SOBDA last treatment week score (x-axis) was plotted against the cumulative proportion of subjects who showed such changes (y-axis), with a line for each response category of the anchor. These plots were repeated for the percentage change from baseline in the SOBDA last treatment week score; plots for the CGI-S, CRQ-SAS dyspnea and FEV1 response categories at Visit 3/PD are shown in Figure 2.16 and Figure 2.17, Figure 2.18 and Figure 2.19, and Figure 2.20 and Figure 2.21, respectively.

## 7. EXPLORATORY EFFICACY

### 7.1. Threshold for SOBDA Responders and Minimally Important Difference by Treatment Group

A summary of SOBDA score response by treatment group for each treatment week is shown in Table 3.04. Proportions of subjects are shown using a threshold of SOBDA score reduction of -0.1 and -0.2. These values were based on the data from the cumulative distribution function plots and the findings and interpretation of the anchor - based MID analysis. Because a single value was not agreed, the table generated is a variation on that provided in the RAP.

Across all time points, the proportion of subjects crossing the threshold (both -0.1 and -0.2) was numerically higher for the salmeterol group compared with placebo and numerically higher for the FSC group compared with the salmeterol group (Placebo < SAL 50mcg bid < FSC 250/50 mcg BID).

1  
2  
3 Table 3.05 summarizes the change from baseline in SOBDA last treatment week score by  
4 treatment group. After adjusting for age, sex and SOBDA baseline score, the difference  
5 between FSC 250/50 and placebo was -0.09 (95% CI: -0.23, 0.05); between SAL 50 and  
6 placebo was 0.03 (95% CI: -0.11, 0.16 which did not meet the potential MID range of  
7 -0.1 to -0.2.  
8  
9

## 10 **7.2. SOBDA Diary**

11  
12 SOBDA score results, change from baseline in SOBDA scores and the analysis of change  
13 from baseline in these scores will be reported subsequent to agreement with the FDA on  
14 the appropriate scoring system for the SOBDA questionnaire as previously described in  
15 Section 6.  
16  
17

## 18 **7.3. Rescue Medication Use**

19  
20 At Baseline, the total mean number of puffs of rescue medication per day was 4.9 and  
21 ranged from 4.3 to 5.2 puffs per day in the treatment and placebo groups. By treatment  
22 Week 6, the total mean number of puffs per day was 3.8 and ranged from 3.5-4.0 in the  
23 treatment and placebo groups (Table 3.06).  
24  
25

26  
27 The change from Baseline in mean number of puffs per day is summarized in Table 3.07  
28 and shows that at the last treatment week, the total mean number of puffs per day had  
29 decreased by 0.9, with the greatest mean decrease of 1.3 puffs/day being observed in the  
30 FSC 250/50 group. Over time (Week 1 through Week 6), the mean decrease in puffs/day  
31 in the placebo group was minimal (increase of 0.1 to decrease of 0.3), while the need for  
32 rescue medication in the SAL 50 and FSC 250/50 groups exhibited a sustained decrease  
33 after Week 1, ranging from 0.4 to 0.8 puffs/day in the SAL 50 group and 1.1 to 1.6  
34 puffs/day for the FSC 250/50 group at any given timepoint.  
35  
36

## 37 **7.4. Rescue-Free Days**

38  
39 At Baseline, the total mean number of rescue-free days was 21.2 and ranged from 21.5 to  
40 22.7 days in the treatment and placebo groups. By treatment Week 6, the total mean  
41 number of rescue-free days was 31.1 and ranged from 22.4-36.2 in the treatment and  
42 placebo groups (Table 3.08).  
43  
44

45  
46 The change from Baseline in mean number of rescue-free days is summarized in  
47 Table 3.09 and shows that at the Last treatment week, the total mean number of rescue-  
48 free days had increased by 7.1 and the greatest mean increase of 10.7 rescue-free days  
49 was seen in the FSC 250/50 group. Over time, the mean change in rescue-free days in  
50 the placebo group did not demonstrate a consistent trend (mean number of days ranging  
51 from -0.2 to 2.3), while the increase in rescue-free days in the SAL 50 and FSC 250/50  
52 groups exhibited continuing improvements after Week 1, increasing from 2.2 to 6.8 days  
53 in the SAL 50 group and 7.4 to 11.7 days for the FSC 250/50 group from Week 1 through  
54 Week 6.  
55  
56  
57  
58  
59  
60



## 7.5. Global Assessment of Shortness of Breath

The global assessment of shortness of breath was completed by subjects on a daily basis during the two week run-in period and for 6 weeks post-randomization (56 consecutive days) and is summarized in Table 3.10 and shows that throughout the Run-in and treatment periods, the majority of subjects reported scores of 2 (slightly) or 3 (moderately).

## 7.6. Patient Global Assessment of Change

The PGAC was completed by subjects on a weekly basis, indicating their assessments on a numerical scale with 1=much worse, 2=worse, 3=no change, 4= better and 5= much better compared to the previous week and is summarized in Table 3.11

The summary of PGAC response is provided in Table 3.12. Responders were defined as subjects who had a score of 4 or 5 on the weekly PGAC assessments, indicating an improvement from their previous week's response.

The percentage of subjects considered responders at Study Day 8 was 31% for both the placebo and SAL 50 group and 42% for the FSC 250/50 group. The proportion of responders was generally higher for active treatments compared with placebo at each subsequent week, indicating that subjects receiving active treatment continued to improve more than those receiving placebo throughout the study.

## 7.7. Summary of patient exit evaluation

The majority of subjects did not report having difficulties in using the eDiaries or answering the eDiary questions. In the mITT population, the majority of subjects ( $\geq 72\%$ ) reported being 'very confident' in using the electronic diary and  $\geq 85\%$  reported 'very good' or 'good' for ease of use of the electronic diary. In the mITT population, 62% of subjects reported that they would be willing to complete the eDiary for 6 months or longer and 89% reported they would be 'very willing' or 'willing' to participate using the eDiary again. The summary of all patient exit evaluations regarding use of the eDiary is given in Table 3.13.

## 7.8. Lung Function

FEV<sub>1</sub> responders were defined as subjects who had a change from Visit 2 to Visit 3/PD of 100mL or more. An FEV<sub>1</sub> non-responder was defined as a subject who had a change of < 100mL. The summary of mean FEV<sub>1</sub> values is given in Table 3.14 and the summary of change from baseline in these values is given in Table 3.15. The mean change in the placebo and SAL 50 group did not meet the definition for response, with mean changes of 1ml and 61ml, respectively, while the mean change in the FSC 250/50 group did meet the definition (mean change in FEV<sub>1</sub> =138ml).

The change from FEV<sub>1</sub> from Visit 2 to Visit 3/PD was categorized into a 3-point response scale. The 3-point scale has 'no change or worse' defined as a change of <50mL, 'better'

1  
2  
3 as a change of 50- $<$ 100mL and ‘much better’ as a change of 100mL or more. The  
4 summary of this data is provided in Table 3.16 and shows that the majority of subjects in  
5 the SAL 50 and FSC 250/50 groups had a change of ‘better’ or ‘much better’ (55% and  
6 62%, respectively, compared with the placebo group, where only 38% of subject had a  
7 change of ‘better’ or ‘much better’. Forty-nine percent of FSC 250/50 subjects were  
8 considered responders, compared with 38% of SAL 50 subjects and 25% of placebo  
9 subjects.  
10

11  
12 Visit 2 and Visit 3/PD FVC values are summarized in Table 3.17, with a summary of the  
13 change from Baseline in FVC at Visit 3/PD being provided in Table 3.18 and showing  
14 that mean FVC values decreased by 7ml in the placebo group and increased by 81ml in  
15 the SAL 50 group and 180ml in the FSC 250/50 group.  
16

## 17 18 **7.9. CRQ-SAS Domain Scores**

19  
20 The summary of CRQ-SAS dyspnoea domain scores (emotional function, mastery,  
21 Dyspnea and Fatigue) assessed at Visit 2 and Visit 3/PD is presented in Table 3.19 and  
22 the summary of change from Baseline at Visit 3/PD is given in Table 3.20.  
23

24  
25 The greatest mean changes for dyspnea and fatigue were seen in the FSC 250/50 group  
26 (0.4 and 0.3, respectively) but did not change by the minimum clinically important  
27 difference (0.5 units). The mean changes from baseline in Emotional Function were  
28 similar between placebo and the two treatment groups (0.2 and 0.1), as were the mean  
29 changes from baseline for Mastery (0.2 for placebo, 0.3 for SAL 50 and 0.4 for FSC  
30 250/50).  
31

32  
33 The summary of the dyspnoea domain response by 3-point response category (no change  
34 or worse, better or much better) is provided in Table 3.21 and shows that the SAL 50 and  
35 FSC 250/50 groups reported a change of ‘better’ or ‘much better’ (56% and 65%,  
36 respectively, compared with the placebo group, where only 53% of subject reported a  
37 change of ‘better’ or ‘much better’. Thirty-four percent of placebo subjects were rated as  
38 responders, compared with 37% of SAL 50 subjects and 46% of FSC 250/50 subjects.  
39

## 40 41 42 **7.10. Clinician Global Impression of Change**

43  
44 Visit 2 and Visit 3/PD CGI-S scores are summarized in Table 3.22, with a summary of  
45 the CGI-S values at Visit 3/PD being provided in Table 3.23. The majority of subjects in  
46 both treatment groups and placebo reported either ‘no change’ or ‘better’ on the CGI-C  
47 response scale, with 49% of FSC 250/50 subjects meeting the definition of ‘responder’,  
48 compared with 37% of SAL 50 subjects and 26% of placebo subjects.  
49

## 50 51 52 **7.11. Patient-completed Dyspnea Scale**

53  
54 Screening mean values for the patient completed mMRC dyspnea scale were identical  
55 (2.3) for the two treatment groups and placebo and decreased for both treatment groups  
56 and placebo at the Visit 3/PD assessment, with the smallest mean value (1.6) being  
57 observed in the FSC 250/50 group, compared with means of 1.8 and 1.7 for the SAL 50  
58  
59  
60

1  
2  
3 and placebo groups, respectively (Table 3.24). Thirty-five percent of the FSC 250/50  
4 subjects met the definition of 'responder' for the patient-completed mMRC dyspnea  
5 scale, compared with 30% of SAL 50 subjects and 22% of placebo subjects (Table 3.25).  
6  
7

## 8 **7.12. Clinician-completed mMRC Dyspnea Scale**

9  
10 Screening mean values for the clinician-completed mMRC dypnea scale were similar to  
11 those of the patient-completed values, ranging from 2.4-2.5, and decreased to 2.0 for the  
12 FSC 250/50 group at Visit 3/PD, compared with 2.2 for SAL 50 and placebo  
13 (Table 3.26). Thirty-three percent of the FSC 250/50 subjects met the definition of  
14 'responder' for the physican-completed mMRC dyspnea scale, compared with 28% of  
15 SAL 50 subjects and 23% of placebo subjects (Table 3.27).  
16  
17  
18  
19  
20  
21  
22  
23  
24  
25  
26  
27  
28  
29  
30  
31  
32  
33  
34  
35  
36  
37  
38  
39  
40  
41  
42  
43  
44  
45  
46  
47  
48  
49  
50  
51  
52  
53  
54  
55  
56  
57  
58  
59  
60

## 8. HEALTHCARE UTILIZATION

On the electronic daily diary, subjects were asked, “Did you have contact with a doctor or nurse about your lung condition today?” If the subject answered “Yes,” they were prompted to give information about the type of clinician contact on the electronic diary. The study sites completed further details of the healthcare contacts on the healthcare utilization worksheet. All relevant details of any subject healthcare provider contact such as phone calls, unscheduled clinic visits, ER visits, or hospitalizations were recorded on the healthcare utilization worksheets. The data included date of contact, type of contact, reason for contact, and length of visit (as appropriate).

### 8.1. Summary of Healthcare Provider Contacts via Electronic Daily Diary

The percentage of subjects having contact with a healthcare provider on any day during the Run-in was 30% for the Run-in population and was similar for run-in failures, the treatment groups and placebo (24% to 35%). During the Run-in, the highest proportion of subjects reported clinic visits for regular checkups (71% total, 50% to 74% between groups). Seventeen percent of subjects in this population had clinic visits for a change in symptoms or treatment (11% to 38% between groups) and 15% of subjects in the population made telephone contacts to the provider. Six percent or fewer subjects in any group went to emergency rooms, urgent care centers or were admitted to hospital.

During treatment, 27% of subjects had contact with a healthcare provider on any day and the percentages of these contacts were similar between the groups (24% to 31%). While being treated by a healthcare provider, the majority of subjects in this population (63%) contacted a provider for a regular check-up (62% to 65% between groups) and 33% of subjects in this population had clinic visits for a change in symptoms or treatment (30% to 36% between groups) and 11% of subjects in the population made telephone contacts to the provider. Fifteen percent or fewer subjects in any group went to emergency rooms, urgent care centers or were admitted to hospital (Table 5.01).

### 8.2. Healthcare Utilization during Run-in

Subject contact with healthcare providers during Run-in was low. Six percent (25 subjects) were recorded as having a Healthcare Utilization , with 5% (20 subjects) making 1 office visit and <1% making 2 office visits (no subjects reported >2 visits). Additionally, <1% of subjects (4 subjects) reported making 1 phone call to a provider. Three subjects (<1%) made 1 emergency room visit and one subject reported >2 emergency room visits. No subjects in any group reported home/day visits or home/night visits. The total length of contact for the majority (>99%) of subjects was 0 to 3 days, with 1 subject (<1%) having contact for 3 to 7 days and 3 subjects (<1%) having contact for 7 to 14 days (Table 5.02).

### 8.3. Healthcare Utilization during Treatment

During treatment, the majority of subjects (87%) did not report a Healthcare Utilization, and the percentages of those subjects who did report a Healthcare Utilization were similar between placebo and treatment groups. Individual types of utilizations are detailed in Table 8.

**Table 8 Summary of Unscheduled Healthcare Utilization during Treatment <sup>1</sup> (ASQ112989 mITT population)**

| n (%)                                         | Placebo (N=75) | SAL 50mcg (N=151) | FSC 250/50mcg (N=139) | Total (N=365) |
|-----------------------------------------------|----------------|-------------------|-----------------------|---------------|
| Unscheduled healthcare utilization            |                |                   |                       |               |
| n                                             | 75             | 151               | 139                   | 365           |
| Yes                                           | 11 (15)        | 19 (13)           | 17 (12)               | 47 (13)       |
| No                                            | 64 (85)        | 132 (87)          | 122 (88)              | 318 (87)      |
| Total number of telephone calls               |                |                   |                       |               |
| 0                                             | 70 (93)        | 147 (97)          | 135 (97)              | 352 (96)      |
| 1                                             | 3 (4)          | 3 (2)             | 3 (2)                 | 9 (2)         |
| 2                                             | 1 (1)          | 0                 | 1 (<1)                | 2 (<1)        |
| >2                                            | 1 (1)          | 1 (<1)            | 0                     | 2 (<1)        |
| Total number of office/practice visits        |                |                   |                       |               |
| 0                                             | 67 (89)        | 135 (89)          | 127 (91)              | 329 (90)      |
| 1                                             | 5 (7)          | 14 (9)            | 8 (6)                 | 27 (7)        |
| 2                                             | 1 (1)          | 2 (1)             | 3 (2)                 | 6 (2)         |
| >2                                            | 2 (3)          | 0                 | 1 (<1)                | 3 (<1)        |
| Total number of urgent care/outpatient visits |                |                   |                       |               |
| 0                                             | 74 (99)        | 151 (100)         | 136 (98)              | 361 (99)      |
| 1                                             | 1 (1)          | 0                 | 3 (2)                 | 4 (1)         |
| Total number of emergency room visits         |                |                   |                       |               |
| 0                                             | 71 (95)        | 145 (96)          | 137 (99)              | 353 (97)      |
| 1                                             | 4 (5)          | 6 (4)             | 2 (1)                 | 12 (3)        |
| Total number of days spent in intensive care  |                |                   |                       |               |
| 0                                             | 75 (100)       | 150 (>99)         | 139 (100)             | 364 (>99)     |
| 1                                             | 0              | 1 (<1)            | 0                     | 1 (<1)        |
| Total number of days spent in a general ward  |                |                   |                       |               |
| 0                                             | 72 (96)        | 146 (97)          | 138 (>99)             | 356 (98)      |
| 1                                             | 1 (1)          | 0                 | 0                     | 1 (<1)        |
| 2                                             | 0              | 0                 | 0                     | 0             |
| >2                                            | 2 (3)          | 5 (3)             | 1 (<1)                | 8 (2)         |
| Total length of contact (days)                |                |                   |                       |               |
| 0-3                                           | 72 (96)        | 145 (96)          | 135 (97)              | 352 (96)      |
| >3-7                                          | 1 (1)          | 4 (3)             | 1 (<1)                | 6 (2)         |
| >7-14                                         | 1 (1)          | 1 (<1)            | 2 (1)                 | 4 (1)         |
| >14                                           | 1 (1)          | 1 (<1)            | 1 (<1)                | 3 (<1)        |

1. Reported for one or more subjects in any group

Daily healthcare utilization is recorded by the subject on the eDiary and unscheduled healthcare utilization is recorded by the site on a worksheet. The data do not always match

Source: Table 5.03

## 9. SAFETY RESULTS

For these safety results, Adverse Events (AE) were coded using the standard GSK dictionary (MedDRA) and grouped by body system for the summary tables. Within each treatment group, AEs were summarized by frequency and percentage of total subjects by SOC and preferred term. Because safety was not a primary or secondary endpoint of the study, only those events which occurred in  $\geq 3\%$  of subjects are discussed in the core text. All adverse events, regardless of incidence level, are summarized in the ICH tables.

### 9.1. Adverse Events

#### 9.1.1. Adverse Event Overview

The overall incidence of subjects reporting AEs occurring during the treatment period was low and comparable across all three groups. The number of subjects reporting AEs related to study treatment or which lead to discontinuation of treatment or dose reduction was low. Few subjects experienced an SAE that was related to treatment and the single fatal SAE was not ascribed to treatment (Table 9).

**Table 9 On-treatment Adverse Event Overview (ASQ112989 mITT Population)**

|                                                      | Placebo<br>(N=75) | SAL 50mcg<br>(N=151) | FSC 250/50mcg<br>(N=139) |
|------------------------------------------------------|-------------------|----------------------|--------------------------|
| ANY AE                                               | 14 (19)           | 34 (23)              | 37 (27)                  |
| AE related to study treatment                        | 3 (4)             | 9 (6)                | 4 (3)                    |
| AE leading to permanent discontinuation of treatment | 3 (4)             | 3 (2)                | 7 (5)                    |
| AE leading to dose reduction                         | 0                 | 0                    | 0                        |
| AE leading to dose interruption/delay                | 1 (1)             | 3 (2)                | 0                        |
| Any SAE                                              | 4 (5)             | 5 (3)                | 3 (2)                    |
| SAE related to study treatment                       | 2 (3)             | 1 (<1)               | 0                        |
| Fatal SAE                                            | 0                 | 0                    | 1 (<1)                   |
| Fatal SAE related to study treatment                 | 0                 | 0                    | 0                        |

Source: Table 4.02

#### 9.1.2. On-Treatment Adverse Events

The most commonly reported AEs in the respiratory, thoracic and mediastinal disorders SOC were COPD and dyspnoea. In the nervous system disorders SOC, headache was the most commonly reported AE. Respiratory tract infection was also reported by 2 subjects (3%) in the placebo group. No other individual AEs in any other SOC occurred in  $\geq 3\%$  of subjects in the placebo or treatment groups. A summary of the most common adverse events across all SOCs by treatment is provided in Table 10.

**Table 10 Summary of Common\*On-treatment Adverse Events (ASQ112989 mITT Population)**

|                                       | Placebo<br>(N=75) | SAL 50mcg<br>(N=151) | FSC 250/50mcg<br>(N=139) |
|---------------------------------------|-------------------|----------------------|--------------------------|
| ANY EVENT                             | 14 (19)           | 34 (23)              | 37 (27)                  |
| Chronic obstructive pulmonary disease | 4 (5)             | 3 (2)                | 0                        |
| Dyspnoea                              | 2 (3)             | 4 (3)                | 1 (<1)                   |
| Headache                              | 2 (3)             | 6 (4)                | 5 (4)                    |
| Respiratory tract infection           | 2 (3)             | 0                    | 0                        |

Source: Table 4.03

\* Occurring in  $\geq 3\%$  of subjects in any group.

### 9.1.3. Post-Treatment Adverse Events

The overall incidence of subjects reporting AEs occurring post-treatment was low and comparable across all three groups. The number of subjects reporting an AE post-treatment was 4 (5%) in the placebo group 7 (5%) in the FSC 250/50 group and 4 (3%) in the SAL 50 group (Table 4.04). No individual AE occurred in  $\geq 3\%$  of subjects in any group post-treatment.

### 9.1.4. Drug-related Adverse Events on Treatment

The overall incidence of subjects reporting drug-related AEs during treatment was low and comparable between the treatment groups and placebo; 4 subjects (3%) in the FSC 250/50 group and 9 subjects (6%) in the SAL 50 group and 3 subjects (4%) in the placebo group reported any AE considered drug-related. The highest numbers of subjects reporting drug-related AEs were in the respiratory, thoracic and mediastinal disorders SOC, followed by the gastrointestinal disorders SOC.

In the placebo group, the drug-related event reported by the highest proportion of subjects was COPD (2 subjects, 3%); in the FSC 250/50 group the most common event was candidiasis (2 subjects, 1%); in the SAL 50 group the most common event was dyspnoea (4 subjects, 3%).

## 9.2. Serious and Other Significant Adverse Events

### 9.2.1. SAEs prior to treatment

Two SAEs occurred for subjects who did not receive randomized treatment; one incidence of pneumonia and one incidence of COPD exacerbation (Table 4.05). No pre-treatment SAEs were reported (Table 4.06).

## 9.2.2. SAEs during treatment

A total of 12 subjects experienced SAEs while on treatment, 4 (5%) in the Placebo group, 3 (2%) in the FSC 250/50 group and 5 (3%) in the SAL 50 group (Table 4.07).

The SAE reported by the highest proportion of subjects was listed as COPD, being reported for 4 (5%) of placebo subjects, no subjects on FSC 250/50 and 2 (1%) of SAL 50 subjects. No other individual on-treatment SAE was reported for more than 1 subject.

### 9.2.2.1. Drug-related SAEs on Treatment

A total of 3 subjects experienced on-treatment SAEs that were considered to be drug-related; one subject in the SAL 50 group, no subjects in the FSC 250/50 group and 2 subjects in the placebo group. Case narratives for these subjects are located in Section 12 (Listing 4.07).

## 9.2.3. SAEs after treatment

No post-treatment SAEs were reported (Table 4.08).

## 9.2.4. Deaths

One fatal AE of respiratory failure occurred for a subject on treatment with FSC 250/50 during the study (Listing 4.05). The AE was not attributed to FSC 250/50. The narrative for this subject is located in Section 12.

## 9.2.5. Other Significant Adverse Events

### 9.2.5.1. Adverse Events Leading to Permanent Discontinuation of Study Drug or Withdrawal

The incidence of AEs leading to withdrawal or permanent discontinuation of study drug was low and similar between the treatment groups and placebo; 3 subjects (4%) on placebo, 7 subjects (5%) on FSC 250/50 and 3 subjects (2%) on SAL 50 (Table 4.10).

The most common AEs that led to withdrawal or discontinuation were AEs in the respiratory, thoracic and mediastinal disorders SOC. With the exception of two reports of COPD in the placebo group and two reports of dyspnea in the SAL group, no single AE in any of the SOCs was reported for more than one subject in any group.

Case narratives for the subjects who were withdrawn or discontinued from study drug are provided in Section 12.2.



### 9.2.5.2. COPD Exacerbations

An exacerbation was defined as an acute worsening of symptoms of COPD requiring the use of any treatment beyond study medication or rescue salbutamol/albuterol. This included the use of systemic corticosteroids, antibiotics, and/or emergency treatment or hospitalization.

The majority of subjects ( $\geq 90\%$  in each treatment group) in the mITT population did not experience a COPD exacerbation on-treatment, and for those who did experience an exacerbation, the majority ( $\geq 75\%$  of subjects on FSC 250/50 or SAL 50) reported exacerbations of moderate severity.

No subjects in the FSC 250/50 group were hospitalized for their exacerbations, the majority of exacerbations resolved and no exacerbations were fatal (Table 11).

**Table 11 Summary of On-Treatment COPD Exacerbations**

|                                           |                 | Placebo<br>(N=75) | SAL<br>50mcg<br>(N=151) | FSC<br>250/50mcg(N=139) | Total<br>(N=<br>365) |
|-------------------------------------------|-----------------|-------------------|-------------------------|-------------------------|----------------------|
| Number of COPD exacerbations              | n               | 75                | 151                     | 139                     | 365                  |
|                                           | 0               | 69 (92)           | 136 (90)                | 135 (97)                | 340 (93)             |
|                                           | 1               | 5 (7)             | 15 (10)                 | 4 (3)                   | 24 (7)               |
|                                           | >1              | 1 (1)             | 0                       | 0                       | 1 (<1)               |
| Withdrawn due to any exacerbation         |                 | 1 (17)            | 0                       | 1 (25)                  | 2 (8)                |
| Took corticosteroids for any exacerbation |                 | 6 (100)           | 13 (87)                 | 2 (50)                  | 21 (84)              |
| Took antibiotics for any exacerbation     |                 | 6 (100)           | 11 (73)                 | 3 (75)                  | 20 (80)              |
| Hospitalized due to any exacerbation      |                 | 4 (67)            | 4 (27)                  | 0                       | 8 (32)               |
| Worst severity of exacerbation            | n               | 6                 | 15                      | 4                       | 25                   |
|                                           | Moderate        | 2 (33)            | 12 (80)                 | 3 (75)                  | 17 (68)              |
|                                           | Severe          | 4 (67)            | 2 (13)                  | 1 (25)                  | 7 (28)               |
|                                           | Moderate/Severe | 0                 | 1 (7)                   | 0                       | 1 (4)                |
| Worst outcome of exacerbation             | n               | 6                 | 15                      | 4                       | 25                   |
|                                           | Resolved        | 6 (100)           | 12 (80)                 | 3 (75)                  | 21 (84)              |
|                                           | Fatal           | 0                 | 0                       | 0                       | 0                    |
|                                           | Not resolved    | 0                 | 3(20)                   | 1 (25)                  | 4 (16)               |

Source: Table 4.13

### 9.3. Electrocardiograms

12-Lead ECGs were performed at screening. No abnormal, clinically significant ECGs were reported. Forty-four percent of subjects in the ASE population had normal ECGs and 56% had abnormal, but not clinically significant ECGs at screening (Table 4.12). No ECG findings were reported as an AE.

#### 9.4. Vital Signs

Mean screening and Visit 3/PD post-dose values for blood pressure and heart rate were similar in the treatment groups and placebo with only minor changes occurring from Screening to the Visit 3/PD post-dose measurements. No clinically meaningful differences were noted in either the FSC 250/50 or SAL 50 groups versus placebo for heart rate or blood pressure. AEs related to vital signs that were reported are summarized below.

One incidence of elevated blood pressure of moderate intensity with duration of 10 days was reported for subject 1746 (randomized to placebo). The AE resolved and was considered to be related to treatment and no action was taken with respect to the randomized treatment.

Two incidences of elevated blood pressure of mild intensity with durations of 6 days and 7 days were reported for subject 406 (randomized to FSC 250/50). The AE resolved and was not considered to be related to treatment and no action was taken with respect to the randomized treatment.

One incidence of hypertension/worsening hypertension with duration of 17 days was reported for subject 1403 (randomized to FSC 250/50). The AE resolved and was not considered to be related to treatment and no action was taken with respect to the randomized treatment.

One incidence of increased heart rate with duration of 10 days was reported for subject 1504 (randomized to SAL 50). The AE was not considered to be related to treatment by the investigator. The AE resolved and no action was taken with respect to the randomized treatment.

#### 9.5. Pregnancies

No pregnancies were reported during the study.

## 10. DISCUSSION AND CONCLUSIONS

### 10.1. Discussion

The intent of the psychometric analyses conducted using data from this study was confirmatory, with the exception of the assessment of responsiveness and the establishment of a responder threshold and MID.

This study confirmed the reliability of the SOBDA total scores with an internal consistency (assessed by Cronbach's alpha) of 0.89. There are no tests of statistical significance for alpha; the values are presented descriptively on a scale from 0–1.0, with higher scores indicating a more reliable (precise) instrument. A Cronbach's alpha of 0.70 or greater indicates acceptable internal consistency for an instrument (Nunnally, 1994).

The SOBDA was also found to have good test-retest reliability (Pearson's correlation coefficient and ICC both 0.94; effect size for difference between weekly scores=0.01) in subjects reporting no change in their breathlessness (measured by the PGAC). Mean differences between the observations were expected not to exceed an effect size (ES) <0.20. Both the Pearson's correlation and the ICC should be high, exceeding 0.60 (Hays, 1998).

A correlation of greater than 0.3 (moderate to high effect size) between SOBDA and selected patient-reported and clinical assessments of dyspnea severity or constructs hypothetically related to dyspnea severity was anticipated (Cohen, 1988). As expected, the SOBDA scores showed appropriate construct validity through Pearson correlation with the CRQ-SAS dyspnea domain score. The CRQ-SAS dyspnea scale measures the concept most similar to that measured by the SOBDA, and is supportive of the SOBDA's construct validity, showing a high correlation between the SOBDA and the CRQ-SAS dyspnea scale. CGI-C and mMRC correlations were lower than expected, which may be due to the narrow range of responses given by the clinicians (Figure 2.02 and Figure 2.04 show that most subjects were rated as '2' or '3' by the clinician on both scales). The narrow range of the clinicians' mMRC ratings was the result of the inclusion criterion that required all subjects to have an mMRC  $\geq 2$  at the screening visit. SOBDA scores in the study population demonstrated good known group validity through a series of analyses. The scores differentiated among subjects based on clinician and patient-rated dyspnea severity. As expected, discrimination based on patients' rating of their dyspnea severity was better than that based on the clinicians' rating. Known group validity was also confirmed when comparing the SOBDA to the CGI-S. Changes in last treatment week SOBDA scores were significant between responders defined using the CGI-C and CRQ-SAS dyspnea domain, but not the mMRC. This again may be due to variation in the interpretation of the severity of the mMRC response options.

Responsiveness analyses were conducted independent of treatment allocation. Good separation in SOBDA scores was seen between the PGAC groups at Day 8 among all treatment groups combined. Less separation was observed between PGAC groups throughout the later weeks of the 6 week study period compared to Week 1. This is not an unexpected trend to observe since any improvement in shortness of breath would be

1  
2  
3 expected to occur or be perceptible to patients soon after initiating therapy but with  
4 continued improvement being less noticeable over time by the patient. The particularly  
5 diminished responsiveness observed at Day 43 was possibly due to the full sample not  
6 being administered the PGAC at Day 43. Therefore, these data were not comparable to  
7 the other weeks when evaluating responsiveness.  
8

9  
10 Following the analyses described above, a post-hoc analysis was conducted to estimate a  
11 responder threshold using a distribution-based approach, including the half-standard  
12 deviation and standard error of measurement (SEM) methods. The half-standard  
13 deviation as MID was suggested by Norman et. al. because they found “remarkable  
14 universality” of half-standard deviation among statistical estimates of clinical  
15 significance for measures of HRQL [Norman, 2003]. However, Revicki and associates  
16 [Revicki, 2006], while acknowledging that the half-standard deviation was certainly  
17 clinically significant and important, noted that it was too large to be considered as  
18 minimally important. They suggested that an MID in the range of 0.2 to 0.3 standard  
19 deviation was more suitable as the smallest non-ignorable change. Using this approach,  
20 the MID was estimated as 0.2 and 0.3 times the standard deviation of the Run-in Week 1  
21 SOBDA scores. The SEM approach was suggested by Wyrwich, et al. given that  
22 theoretically, the SEM has the property of being sample-independent [Wyrwich, 1999].  
23 The SEM takes into account random measurement error in the observed change and is  
24 calculated by multiplying the standard deviation of the Run-in Week 1 score by the  
25 square root of one minus the reliability coefficient (estimated by the ICC). For SOBDA,  
26 the 0.2 and 0.3 standard deviation identified thresholds of -0.14 and -0.21, respectively.  
27 The SEM method identified a threshold of -0.17.  
28  
29  
30  
31

32 A summit meeting was held on June 18, 2010 including key opinion leaders and  
33 statistical and medical experts from UBC and GSK to review the analyses and to  
34 determine potential responder thresholds based on the anchor-based methods described  
35 above and on distribution-based methods. Clinical experts, [REDACTED],  
36 Professor of Medicine at the University of Texas Health Science Center, San Antonio  
37 Texas and [REDACTED], Professor of Medicine at the University of North  
38 Carolina, School of Medicine, Chapel Hill North Carolina, participated in this summit  
39 meeting to provide a clinical perspective on the assessment of the measurement  
40 properties and define the threshold for response of the SOBDA. Additionally, [REDACTED]  
41 [REDACTED] GSK pulmonologist and Clinical Associate Professor of Medicine,  
42 Division of Pulmonary & Critical Care Medicine at University of North Carolina, Chapel  
43 Hill) has been a member of the development team at all stages. Both the anchor-based  
44 and distribution-based methods supported a threshold range of -0.1 to -0.2 (where  
45 SOBDA weekly scores range from 1-4). When using the anchor-based method, the  
46 evaluation of data around the responder threshold was based on the change from baseline  
47 in the SOBDA score for those subjects who endorsed or had the clinician endorse for  
48 them (depending on the anchor) the response category “better” for the global assessments  
49 or the pre-specified grouping of meaningful improvement on the other measures (PGAC,  
50 CRQ-SAS, FEV<sub>1</sub>). Since dyspnea is a symptom experienced by the patient, and observed  
51 by the clinician, it was agreed that patient-reported anchors are more important to  
52 consider than those reported by their physician. The change in PGAC for subjects who  
53 endorsed ‘better’ was consistent week to week (-0.08 to -0.10 for Weeks 2-5, Week 6  
54 excluded from consideration given the data was only from half of the sample) following  
55  
56  
57  
58  
59  
60

1  
2  
3  
4  
5  
6  
7  
8  
9  
10  
11  
12  
13  
14  
15  
16  
17  
18  
19  
20  
21  
22  
23  
24  
25  
26  
27  
28  
29  
30  
31  
32  
33  
34  
35  
36  
37  
38  
39  
40  
41  
42  
43  
44  
45  
46  
47  
48  
49  
50  
51  
52  
53  
54  
55  
56  
57  
58  
59  
60

the expected initial higher response in SOBDA scores during Week 1 (-0.26). The data from Weeks 2-5 were given greater consideration as it was deemed possible that the minimum value recorded for 'better' would not have been seen at the Week 1 assessment.

The distribution-based MID of half standard deviation and SEM methods were preliminarily reviewed at the summit meeting. The analysis was later refined upon further consideration referencing work by Revicki [Revicki, 2006] of using 0.2 and 0.3 standard deviation. The 0.2 and 0.3 standard deviation identified thresholds of -0.14 and -0.21, respectively, and the SEM method identified a threshold of -0.17. The suggested threshold range of -0.1 to -0.2 was also supported by the cumulative distribution plots (Figure 2.10- Figure 2.14). This range is consistent with that of the CRQ-SAS (MID of 0.5 on a 7-point Likert scale) (Schunemann, 2005).

## 10.2. Conclusions

The SOBDA was developed according to the FDA Guidance for Industry on Patient-Reported Outcome Measures for Use in Medical Product Development to Support Labeling Claims (FDA 2009).

Reliability and validity of the SOBDA were again demonstrated to be acceptable. The baseline SOBDA scores were found to be strongly correlated with the CRQ-SAS dyspnea domain, which measures similar concepts. The SOBDA also discriminated between subjects based on severity levels (clinician rated severity of dyspnea at Visit 1).

The analyses from this study also provide evidence that the instrument is responsive to change based on responders on the CGI-C and CRQ-SAS dyspnea domain.

At this stage of instrument development, a threshold range is the most appropriate recommendation for establishing a definition for treatment responders. Based on anchor-based and distribution-based methods, the range of the responder threshold is proposed as -0.1 to -0.2; a specific value will be identified as more data is generated in future clinical trials.

The population enrolled in this study was consistent with previous clinical trials conducted evaluating bronchodilator products in subjects with COPD. Specifically, subjects were predominantly white (90%) and male (57%); the mean age was 61.1 years and the mean body mass index was 28.3 kg/m<sup>2</sup>. The majority (70%) of the study subjects were current smokers at study entry with an extensive smoking history (mean smoking history of 54.9 pack-years). The mean post-albuterol percent predicted FEV1 was 49.9%, indicative of a population with moderately severe airflow obstruction.

Overall, FSC 250/50 was well-tolerated in this study and the overall incidence of on-treatment AEs was low (27%) and comparable with SAL (23%) and placebo (19%). The only events which occurred in ≥3% of subjects in either of the treatment groups or placebo were COPD, respiratory tract infection, dyspnea and headache.

1  
2  
3 Twelve subjects experienced SAEs during the treatment period, three of which were  
4 considered possibly related to study medication. A total of 3 subjects experienced on-  
5 treatment SAEs that were considered to be drug-related; one subject in the SAL 50 group,  
6 no subjects in the FSC 250/50 group and 2 subjects in the placebo group. One fatal event  
7 of respiratory failure occurred for a subject on treatment with FSC 250/50 during the  
8 study. The SAE was not attributed to FSC 250/50.  
9

10  
11 A total of 13 subjects experienced adverse events that led to withdrawal and the  
12 percentages of the AEs were similar between the treatment groups and placebo. (4% of  
13 placebo subjects, 5% of FSC 250/50 subjects and 2% of SAL 50 subjects). No safety  
14 concerns were raised by the results of ECG or vital signs measurements and no treatment-  
15 related changes were apparent.  
16  
17  
18  
19  
20  
21  
22  
23  
24  
25  
26  
27  
28  
29  
30  
31  
32  
33  
34  
35  
36  
37  
38  
39  
40  
41  
42  
43  
44  
45  
46  
47  
48  
49  
50  
51  
52  
53  
54  
55  
56  
57  
58  
59  
60

## 11. REFERENCES

American Thoracic Society (ATS). Dyspnea. Mechanisms, assessment, and management: a consensus statement. *Am J Respir Crit Care Med* 1999; 159(1): 321-340.

Celli BR, MacNee W, ATS/ERS Task Force. Standards for the diagnosis and treatment of patients with COPD: a summary of the ATS/ERS position paper. *Eur Respir J*. 2004; 23: 932-946.

Centers for Disease Control and Prevention (CDC). Facts About Chronic Obstructive Pulmonary Disease (COPD). National Center for Environmental Health. 2-16-2006.

Cohen J. Statistical power analysis for the behavioral sciences. 2<sup>nd</sup> ed. Hillsdale, NJ: Lawrence Earlbaum Associates, 1988.

FDA. Guidance for Industry: Patient-Reported Outcome Measures: Use in Medical Product Development to Support Labeling Claims; December 2009.

Hankinson JL, Odencrantz JR, Fedan KB. Spirometric Reference Values from a Sample of the General US Population. *Am J Respir Crit Care Med* 1999; 159:179-187.

Hays R, Anderson R, Revicki DA. Assessing reliability and validity of measurement in clinical trials. In: Staquet MJ, Hays RD, Fayers PM (eds.). *Quality of Life Assessment in Clinical Trials*. New York: Oxford University Press, 1998.

Kazis LE, Anderson JJ, Meenan RF. Effect sizes for interpreting changes in health status. *Med Care* 1989;27(suppl 3):S178-A189.

Kellee Howard, et al. Development of the Shortness of Breath with Daily Activities Questionnaire (SOBDA). *Value in Health*. (Submitted for review September 2011).

MacNee W, Calverley PM. Chronic obstructive pulmonary disease . 7: Management of COPD. *Thorax* 58(3):261-5, 2003.

Mannino DM, Homa DM, Akinbami LJ, Ford ES. Chronic Obstructive Pulmonary Disease Surveillance - United States, 1971-2000. *Morbidity and Mortality Weekly Report* 2002; 51(SS06):1-16.

Norman G, Sloan J, Wyrwich K. Interpretation of changes in health-related quality of life: the remarkable universality of half a standard deviation. *Med Care*. 2003;41:582-592.

Nunnally JC, Bernstein IH. *The assessment reliability. Psychometric theory*. McGraw-Hill, Inc., 1994.

O'Leary CJ, Jones PW. The influence of decisions made by developers on health status questionnaire content. *Qual Life Res*. 1998;7:545-550.

1  
2  
3 Petty T.L. Definition, epidemiology, course, and prognosis of COPD. Clin Cornerstone  
4 2003; 5:1-10.

5  
6 Rennard S, Decramer M, Calverley PM et al. Impact of COPD in North America and  
7 Europe in 2000: subjects' perspective of Confronting COPD International Survey. Eur  
8 Respir J 2002; 20(4):799-805.

9  
10  
11 Revicki, D.A., Cella, D., Hays, R.D., Sloan, J.A., Lenderking, W.R., & Aaronson, N.K.  
12 (2006). Responsiveness and minimal important differences for patient reported outcomes.  
13 Health and Quality of Life Outcomes, 4, 70.

14  
15 Schunemann HJ, Puhan M, Goldstein R, Jaeschke R, and Guyatt GH. "Measurement  
16 Properties and Interpretability of the Chronic Respiratory Disease Questionnaire (CRQ)."  
17 Journal of Chronic Obstructive Pulmonary Disease. 2005;2:81-89.

18  
19  
20 Stang P, Lydick E, Silberman C, Kempel A, Keating ET. The Prevalence of COPD.  
21 Chest 2000; 117(5 (Suppl 2)):354S-359S.

22  
23 Wyrwich K, Tierney W, Wolinsky F. Further evidence supporting a SEM-based criterion  
24 for identifying meaningful intra-individual changes in health-related quality of life. J Clin  
25 Epidemiol. 1999;52(9):861-873.  
26  
27  
28  
29  
30  
31  
32  
33  
34  
35  
36  
37  
38  
39  
40  
41  
42  
43  
44  
45  
46  
47  
48  
49  
50  
51  
52  
53  
54  
55  
56  
57  
58  
59  
60



## 12. CASE NARRATIVES

There may be minor discrepancies in the details of the SAEs included in the clinical narratives compared with the safety tabulations. This is because the data comes from two different databases (i.e., locked clinical trials database and dynamic SAE database) and has been collected at different points in time. However, all key data points are reconciled. It is considered that these minor discrepancies do not change the overall clinical significance or understanding of the SAE.

### 12.1. Serious Adverse Events

|                      |                                             |
|----------------------|---------------------------------------------|
| Protocol Id:         | ASQ112989                                   |
| Investigator Number: | 074894                                      |
| Subject Number:      | 000018                                      |
| Treatment Number:    | 1803                                        |
| Case Id:             | Z0004630A                                   |
| Suspect Drugs:       | Fluticasone propionate+salmeterol xinafoate |
| Serious Events:      | Respiratory failure                         |

This 72-year-old female subject was enrolled in a blinded study for the treatment of chronic obstructive pulmonary disease. The subject received inhaled investigational product twice per day from 07 May 2010.

The subject was a former smoker (57 pack-year smoking history) and had a diagnosis of COPD (emphysema) between 10-15 years. Current medical conditions identified for the subject at screening by body system were: musculoskeletal and connective tissue disorders and nervous system disorders. Concomitant medications identified during the study were calcium, aspirin, vitamin E, vitamin D, multi-vitamin, alendronate, ropinirole, trazodone, ipratropium bromide and salbutamol sulphate.

On 11 June 2010, 35 days after the start of investigational product, the subject developed severe respiratory failure. The event was life-threatening. The subject also experienced worsening of shortness of breath. The subject was treated with salbutamol sulphate. The last dose of investigational product was on 10 June 2010. The investigator confirmed that respiratory failure was the primary SAE, with cardiorespiratory arrest as the outcome. The subject died on 11 June 2010 due to respiratory failure. An autopsy was not performed. The investigator considered that there was no reasonable possibility that the respiratory failure may have been caused by investigational product.

#### Diagnostic Assessments:

Blood pH 7.22 (7.35-7.45); pCO<sub>2</sub> 93mmHg (35.0-45.0); pO<sub>2</sub> 103mmHg (75.0-100.0); bicarbonate 37mmol/L (22.0-26.0); base excess 8.1mmol/L (0-3) This herein included information is resultant from the event Respiratory Failure, and moreover at least adjunct instigant of the event Cardio respiratory arrest.

## Investigator Text:

Patient experienced worsening SOB, was transported to ED by EMS, en-route treatment provided mild relief. ED notes indicate rapid worsening, nothing providing relief. The hospital site of demise informs that no autopsy was performed. No action on IP administration took place. Subject administered all IP doses as prescribed. -

|                      |                                                                                                |
|----------------------|------------------------------------------------------------------------------------------------|
| Protocol Id:         | ASQ112989                                                                                      |
| Investigator Number: | 068039                                                                                         |
| Subject Number:      | 000372                                                                                         |
| Treatment Number:    | 1297                                                                                           |
| Case Id:             | Z0004593A                                                                                      |
| Suspect Drugs:       | Cocaine, Cocaine, Fluticasone propionate+salmeterol xinafoate, Lortab, Oxycodone hydrochloride |
| Serious Events:      | Suicide attempt                                                                                |

This 51-year-old male subject was enrolled in a blinded study for the treatment of chronic obstructive pulmonary disease. The subject received inhaled investigational product twice per day from an unspecified date.

The subject was a current smoker (41 pack-year smoking history) and had a diagnosis of COPD (chronic bronchitis and emphysema) between 1-5 years. Current medical conditions identified for the subject at screening by body system were: musculoskeletal and connective tissue disorders. Medical conditions at the time of the event included depression. Concomitant medications included aprazolam, buprenorphine hydrochloride, oxygen, cocaine, oxycodone hydrochloride, "crack" and Lortab. The subject had family history of mental illness and suicide attempt in parental grandmother. Her daughter has history of substance abuse.

On 04 June 2010, 32 days after the start of investigational product, the subject developed grade 3 or severe attempted suicide, plan to shoot himself. The event was life-threatening. Treatment with investigational product was discontinued on 15 June 2010. The subject reported to psychiatrist current use of crack, cocaine, lortab and oxycontin for the past two months. Subject received treatment at Behavioral Health Center. No diagnostic tests performed. The event resolved on 14 June 2010. The investigator considered that there was no reasonable possibility that the attempted suicide may have been caused by investigational product and that the event was possibly due to the concomitant medication, cocaine, oxycodone hydrochloride, "crack" and Lortab.

## Investigator Text:

On 04 JUN 2010 subject attempted suicide with a plan to shoot himself. Subject reported to psychiatrist current use of crack, cocaine, lortab, and oxycontin for the past two months. Last use was on 03 JUN 2010. Subject was treated at center for 10 days. Subject was discharged home. Subject has a family history of mental illness and suicide attempt in parental grandmother. Daughter has history of substance abuse. -

|                      |                                       |
|----------------------|---------------------------------------|
| Protocol Id:         | ASQ112989                             |
| Investigator Number: | 068042                                |
| Subject Number:      | 000452                                |
| Treatment Number:    | RUN-IN                                |
| Case Id:             | Z0002212A                             |
| Suspect Drugs:       | No therapy                            |
| Serious Events:      | Chronic obstructive pulmonary disease |

This 47-year-old male subject was enrolled in a double-blind, parallel-group for the treatment of chronic obstructive pulmonary disease. The subject received no therapy.

Medical conditions at the time of the event included chronic obstructive pulmonary disease.

On 04 November 2009, the subject developed severe exacerbation of chronic obstructive pulmonary disease. The subject was hospitalised overnight. The subject also experienced blood in sputum. The investigator reported "Hemoptysis consistent with acute exacerbation of COPD". Relevant assessments included pulse oximetry on 06 November 2009, 18:12 - 90%, 18:21 - 91%, 18:28 - 92%, 19:29 - 98%, 22:27, 95%. The subject was treated with prednisone, oxygen and Symbicort and the subject was withdrawn from the study. The event resolved on 07 November 2009. The investigator considered that there was no reasonable possibility that the exacerbation of chronic obstructive pulmonary disease may have been caused by study participation.

Investigators text:

Subject presented to the Emergency Room complaining of blood in sputum. Subject admitted to hospital for observation over-night. Subject given oxygen therapy and prednisone. Hemoptysis consistent with acute exacerbation of COPD. -

|                      |                                                                                            |
|----------------------|--------------------------------------------------------------------------------------------|
| Protocol Id:         | ASQ112989                                                                                  |
| Investigator Number: | 068048                                                                                     |
| Subject Number:      | 000704                                                                                     |
| Treatment Number:    | 1053                                                                                       |
| Case Id:             | Z0002607A                                                                                  |
| Suspect Drugs:       | Salmeterol xinafoate                                                                       |
| Serious Events:      | Dehydration, Diabetes mellitus inadequate control, Impaired gastric emptying, Pneumothorax |

This 71-year-old female subject was enrolled in a blinded study for the treatment of chronic obstructive pulmonary disease. The subject received inhaled investigational product twice per day from 09 December 2009.

Medical conditions at the time of the event included diabetes and diabetic gastroparesis.

On 11 December 2009, two days after the start of investigational product, the subject developed grade 3 or severe dehydration, grade 3 or severe uncontrolled diabetes and grade 3 or severe increased gastroparesis. She had been vomiting intermittently since 26 November 2009 due to the medical condition of diabetic gastroparesis. On 13 December 2009, 4 days after the start of investigational product the subject developed grade 3 or severe pneumothorax. The subject was hospitalised. Treatment with investigational product was interrupted. Laboratory, chest X-ray, MRI and ECG results were pending. The subject was treated with metoclopramide hydrochloride and insulin. The events resolved on 16 December 2009. The investigator considered that there was no reasonable possibility that the dehydration, pneumothorax, uncontrolled diabetes and increased gastroparesis may have been caused by investigational product.

Investigator text:

Patient was hospitalized on 11 Dec 2009 after a visit to her endocrinologist. She had been vomiting intermittently since 26 Nov 2009 due to her diabetic gastroparesis. She was diagnosed with dehydration. On 13 Dec 2009, she had a \*pneumothorax of her left lung while she was still hospitalized. Her doctor intends for her to remain hospitalized until 16 Dec 2009. (This is all per patient report when she called our office today, 14 Dec 2009.) Medical Records will be requested to be sent to CTHR after her discharge. Per patient report, her doctor said: pneumothorax was caused by the recurrent vomiting (will look at medical records to verify if this was the case)

|                      |                                       |
|----------------------|---------------------------------------|
| Protocol Id:         | ASQ112989                             |
| Investigator Number: | 068087                                |
| Subject Number:      | 000909                                |
| Treatment Number:    | 1036                                  |
| Case Id:             | Z0003665A                             |
| Suspect Drugs:       | Placebo                               |
| Serious Events:      | Chronic obstructive pulmonary disease |

This 55-year-old female subject was enrolled in a blinded study for the treatment of chronic obstructive pulmonary disease. The subject received inhaled investigational product twice per day from 12 January 2010.

Medical conditions at the time of the event included current smoker. Concomitant medications included docusate sodium, dalteparin sodium, nicotine and lorazepam.

On 18 January 2010, six days after the start of investigational product, the subject developed severe exacerbation of chronic obstructive pulmonary disease. The subject visited ER with cough, shortness of breath and wheeze. The subject was hospitalised. Physical Examination revealed T 98.1, HR 89, RR 19 and 24, O2 saturation 96%, BP 123/70. Chest x-ray negative at time of admission. The subject was treated with moxifloxacin hydrochloride, methylprednisolone sodium succinate, Duoneb and Tussionex syrup. Treatment with investigational product was continued. The event

resolved on 21 January 2010. The investigator considered that there was no reasonable possibility that the exacerbation of chronic obstructive pulmonary disease may have been caused by investigational product.

Relevant Diagnostics:

Chest x-ray negative at time of admission. No other lab results received when notes requested

Investigator text:

Pt presented to the ER with c/o cough, SOB and wheeze. PE revealed T 98.1, HR 89, RR 19 & 24, O2sat 96%, BP 123/70. She was admitted and received Inhaled BD, ICS, IV antibiotics IV steroids. Physician orders have been requested for meds, doses and dates administered Pt did not reveal to study staff during the study or at visit 3 that she had been sick. Review of written diary showed no hospitalization. Review of PHT medical contact report indicates NO for all dates Jan 18-23. Site received information along with the request for a routine chest x-ray upon entry into another trial 23 Mar 2010. -

|                      |                                             |
|----------------------|---------------------------------------------|
| Protocol Id:         | ASQ112989                                   |
| Investigator Number: | 068060                                      |
| Subject Number:      | 001151                                      |
| Treatment Number:    | 1674                                        |
| Case Id:             | Z0003944A                                   |
| Suspect Drugs:       | Fluticasone propionate+salmeterol xinafoate |
| Serious Events:      | Myocardial infarction                       |

This 54-year-old male subject was enrolled in a blinded study for the treatment of chronic obstructive pulmonary disease. The subject received inhaled investigational product twice per day from 12 March 2010.

The subject was randomised to Fluticasone propionate (CCI18781)/salmeterol xinafoate (GR33343G) combination product 250/50mcg per inhalation via DISKUS.

Medical conditions at the time of the event included coronary artery disease.

On 11 April 2010, 30 days after the start of investigational product, the subject developed grade 3 or severe myocardial infarction. The subject was hospitalised for non-ST elevation myocardial infarction. The subject woke with chest pain and shortness of breath. The subject was treated with metoprolol tartrate, nitroglycerine, heparin sodium and clopidogrel bisulphate. Relevant laboratory values on 12 April 2010 - haemoglobin 12.6, white blood cell count 9.9, Troponin 0.11, Troponin I 0.14, potassium 3.8, magnesium 1.5, fasting blood glucose 119 and creatinine phosphokinase MB 6.9, blood myoglobin 119 (units and normal ranges unavailable). The subject had post left heart catheterization with a stent to the left subclavian. Treatment with investigational product was continued. The event resolved on 18 April 2010. The investigator considered that there was no reasonable possibility that the myocardial infarction may have been caused by investigational product.

Investigator text:

Subject was awoken with chest pain and shortness of breath. Subject has a significant coronary artery disease; history and chest pain, which is typical; EKG changes; enzymes, which are positive. Subject was admitted for non-ST elevation myocardial infarction, status post left heart catheterization with a stent to the left subclavian.

Follow up received on 15 June 2010 on answered query:

The subject did not have any relevant concurrent medications - none of them were the cause of the SAE.

|                      |                                       |
|----------------------|---------------------------------------|
| Protocol Id:         | ASQ112989                             |
| Investigator Number: | 068062                                |
| Subject Number:      | 001206                                |
| Treatment Number:    | 1186                                  |
| Case Id:             | Z0003239A                             |
| Suspect Drugs:       | Placebo                               |
| Serious Events:      | Chronic obstructive pulmonary disease |

This 76-year-old female subject was enrolled in a blinded study for the treatment of chronic obstructive pulmonary disease. The subject received inhaled investigational product twice per day from 27 January 2010.

The subject was a former smoker (70 pack-year smoking history) and had a diagnosis of COPD (chronic bronchitis and emphysema) between 1-5 years. Current medical conditions identified for the subject at screening by body system were: cardiac disorders, gastrointestinal disorders, and respiratory, thoracic, and mediastinal disorders. Concomitant medications identified during the study were aspirin, omeprazole, amlodipine, and olmesartan and Advair

On 12 February 2010, 16 days after the start of investigational product, the subject developed grade 3 or severe exacerbation of chronic obstructive pulmonary disease. The subject was hospitalised. The subject also experienced acute shortness of breath, intermittent wheezing. Chest X-ray results were normal. On 14 February 2010 tests showed white blood cell count was 8.1 k/uL (4.8 - 10.8), pCO<sub>2</sub> was 41.0 mmHg (35 - 48) and pO<sub>2</sub> was 68.0 mmHg (83 - 108). The subject was treated with salbutamol sulphate, levofloxacin, prednisone, methylprednisolone sodium succinate and oxygen. Treatment with investigational product was discontinued on 14 February 2010 and the subject was withdrawn from the study. The event resolved on 22 February 2010. The investigator considered that there was a reasonable possibility that the exacerbation of chronic obstructive pulmonary disease may have been caused by investigational product and that the event was possibly due to study participation.

Investigator text:

COPD exacerbation (cold weather induced), possible lack of efficacy. Patient had acute shortness of breath, intermittent wheezing.

|                      |            |
|----------------------|------------|
| Protocol Id:         | ASQ112989  |
| Investigator Number: | 068065     |
| Subject Number:      | 001302     |
| Treatment Number:    | RUN-IN     |
| Case Id:             | Z0002977A  |
| Suspect Drugs:       | No therapy |
| Serious Events:      | Pneumonia  |

This 48-year-old female subject was enrolled in a blinded study for the treatment of chronic obstructive pulmonary disease. The subject was in the run-in phase and received no therapy.

Concomitant medications included Duoneb.

The subject was called on 21 January 2010 and she stated that she had been treated by her primary care physician for fever and congestion with antibiotics. She was considered run-in failure at that time.

The subject had no relevant medical history or risk factors. On 22 January 2010, the subject developed grade 3 or severe pneumonia. The subject was hospitalised. A chest x-ray on 22 January 2010 showed persistent right basilar infiltrates. The subject was treated with methylprednisolone sodium succinate, ceftriaxone, levofloxacin and guaiphenesin. The event resolved on 26 January 2010. The investigator considered that there was no reasonable possibility that the pneumonia may have been caused by no therapy.

Investigator Text:

The subject was called on 21 Jan 2010 and she stated that she had been treated by her primary care physician for fever and congestion with antibiotics. She was considered run-in failure at that time. She went to see her pulmonologist on 22 Jan 2010 and was diagnosed with Pneumonia and being admitted to the hospital for further treatment.

|                      |                                       |
|----------------------|---------------------------------------|
| Protocol Id:         | ASQ112989                             |
| Investigator Number: | 074563                                |
| Subject Number:      | 001339                                |
| Treatment Number:    | 1846                                  |
| Case Id:             | Z0004145A                             |
| Suspect Drugs:       | Salmeterol xinafoate                  |
| Serious Events:      | Chronic obstructive pulmonary disease |

This 62-year-old female subject was enrolled in a blinded study for the treatment of chronic obstructive pulmonary disease. The subject received inhaled investigational product twice per day from 14 April 2010 to 26 May 2010.

On 16 April 2010, two days after the start of investigational product, the subject developed grade 3 or severe exacerbation of chronic obstructive pulmonary disease. The subject was hospitalised. The subject experienced shortness of breath. Chest x-ray was performed- impression of moderately advanced fibrosis. Pre-existing medical condition. Oxygen saturation on 18 April 2010 was 97% (normal range 95-100). The subject was treated with levofloxacin, prednisone, paracetamol, Lortab, Advair, salbutamol sulphate, aspirin, nicotrol NS, guaiphenesin, enoxaparin, ibuprofen and ketorolac trometamol. Treatment with investigational product was continued. The event resolved on 19 April 2010. The investigator considered that there was no reasonable possibility that the exacerbation of chronic obstructive pulmonary disease may have been caused by investigational product.

Investigator text:

Subject was hospitalized 16Apr for COPD exacerbation. She was discharged 19APR. PI notes that SAE was not related to Investigatory Product. Chest x-ray was performed- impression of moderately advanced fibrosis. Fibrosis was noted in chest x-ray obtained at V1 of study. Pre-existing medical condition. Narrative Remarks: Subject came to office for ASQ112989 V2 study with complaints of SOB. She said she went camping for 3 days (April 9-12) and has been experiencing SOB since her trip. She said smoke from the bonfire and prolonged pollen exposure contributed to her symptoms. Her FEV1 was 10% than it was two weeks earlier. PI was informed by phone about subjects breathing, however, subject refused to wait for PI to evaluate her. Subject was admitted to hospital day after her study visit (16APR10) for a COPD exacerbation.

|                      |                                       |
|----------------------|---------------------------------------|
| Protocol Id:         | ASQ112989                             |
| Investigator Number: | 068072                                |
| Subject Number:      | 001458                                |
| Treatment Number:    | 1354                                  |
| Case Id:             | Z0003703A                             |
| Suspect Drugs:       | Placebo                               |
| Serious Events:      | Chronic obstructive pulmonary disease |

This 66-year-old male subject was enrolled in a blinded study for the treatment of chronic obstructive pulmonary disease. The subject received inhaled investigational product twice per day from 24 February 2010.

The subject was a former smoker (52 pack-year smoking history) and had a diagnosis of COPD (emphysema) between 1-5 years.

Medical conditions at the time of the event included chronic obstructive pulmonary disease. Concomitant medications included tiotropium and Symbicort.

On 17 March 2010, 21 days after the start of investigational product, the subject developed grade 3 or severe exacerbation of chronic obstructive pulmonary disease. The subject also experienced extreme shortness of breath that was not relieved by the administration of investigational product. The subject was hospitalised. Chest X-ray



showed COPD lung changes without pneumothorax or consolidation, ECG showed no clinically significant results. On 21 March 2010, laboratory test results showed troponin I 0.051 ng/ml (normal range 0.00 - 0.034), creatine phosphokinase MB 3.2 ng/ml (0.0 - 4.2), INR 1.1 (0.8 - 1.2) and prothrombin time 10.5 seconds (9.0 - 12.0). The subject was treated with methylprednisolone sodium succinate, salbutamol sulphate, levofloxacin, ipratropium bromide, methylprednisolone, pantoprazole, aspirin and enoxaparin. Treatment with investigational product placebo was discontinued on 21 March 2010 and the subject was withdrawn from the study. The event resolved on 05 April 2010. The investigator considered that there was a reasonable possibility that the exacerbation of chronic obstructive pulmonary disease may have been caused by investigational product.

Investigator text:

Subject states he had a COPD exacerbation starting on 3/17/2010. Subject was admitted to hospital on 3/21/2010 and was released on 3/23/2010. Subject complained of severe shortness of breath that was not relieved by IP. Subject withdrew consent on 3/23/2010.

|                      |                                      |
|----------------------|--------------------------------------|
| Protocol Id:         | ASQ112989                            |
| Investigator Number: | 068081                               |
| Subject Number:      | 001702                               |
| Treatment Number:    | 1161                                 |
| Case Id:             | Z0003345A                            |
| Suspect Drugs:       | Salmeterol xinafoate                 |
| Serious Events:      | Cerebrovascular accident, Chest pain |

This 58-year-old male subject was enrolled in a blinded study for the treatment of chronic obstructive pulmonary disease. The subject received inhaled investigational product twice per day from 09 February 2010.

The subject's past medical history included femoral artery stent. Medical conditions at the time of the event included coronary artery disease and hypertension. Concomitant medications included Avalide and nebivolol hydrochloride.

On 20 February 2010, 11 days after the start of investigational product, the subject developed grade 3 or severe cerebrovascular stroke. On 23 February 2010, the subject developed grade 1 or mild retrosternal chest pain. The subject was hospitalised. Subject also reported experiencing sudden onset of weakness & right parathesias. Labs obtained with elevated lipids noted otherwise unremarkable. ECG performed showing sinus rhythm with nonspecific ST-T changes, upper GI complete which was normal. No other intervention was recommended. The subject was treated with potassium chloride, aspirin, atorvastatin calcium, sodium chloride, clopidogrel bisulphate, midazolam, hydromorphone hydrochloride, oxygen, benzocaine and lignocaine hydrochloride. Treatment with investigational product was interrupted and restarted on 24 February 2010. The event retrosternal chest pain resolved on 23 February 2010 and cerebrovascular stroke resolved on 24 February 2010. The investigator reported "Cannot rule out relationship to event because cerebrovascular stroke and retrosternal chest pain are possible side effects of Advair." The investigator considered that there was a reasonable possibility that the cerebrovascular stroke and retrosternal chest pain may have been caused by investigational product.

## Diagnostic Assessments:

22 February 2010 Transesophageal echocardiogram- normal left ventricular function, no mural thrombus or vegetation -- MRA of the neck - normal; 24 February 2010 Upper GI - normal; 22 February 2010 MRI of Brain showed small amount of plaque in the distal right MI segment with slight distal irregularities; chest x-ray- no acute abnormality

## Investigator text:

Subjects wife contacted office 23 feb 2010 at 17:00 and reported subject had had a stroke on Saturday 20 feb 2010 and was admitted to Hospital. We have requested medical records and will update as soon as records are received. Per medical records subject was taken to WBMC ER after experiencing sudden onset of weakness & right parathesias and subsequently transferred to Princeton Hospital for further evaluation, labs obtained with elevated lipids noted otherwise unremarkable. Subject treated with statins & antiplatelet (aspirin) & received physical therapy. During hospitalization subject evaluated by neurology. On 23 Feb 2010 he developed mild retrosternal chest pain, which was evaluated by cardiology. echocardiogram performed showing sinus rhythm with nonspecific ST-T changes, upper GI complete which was normal. No other intervention was recommended. Subject was discharged on 25 Feb 2010 in stable condition to receive home physical therapy and anti-platelet therapy. Subject restarted study medication on 02/24/2010.

Follow up received on 06 July 2010 on answered query:

The subject did not have pre-existing condition of fibrosis per Visit 1 CXR taken 31 March 2010.

|                      |                                                  |
|----------------------|--------------------------------------------------|
| Protocol Id:         | ASQ112989                                        |
| Investigator Number: | 068081                                           |
| Subject Number:      | 001704                                           |
| Treatment Number:    | 1162                                             |
| Case Id:             | Z0003244A                                        |
| Suspect Drugs:       | Salmeterol xinafoate                             |
| Serious Events:      | Chronic obstructive pulmonary disease, Pneumonia |

This 53-year-old male subject was enrolled in a blinded study for the treatment of chronic obstructive pulmonary disease. The subject received inhaled investigational product twice per day from 09 February 2010.

The subject's past medical history included myocardial infarction. Medical conditions at the time of the event included herpes simplex ophthalmic. Concomitant medications included acyclovir, ipratropium bromide, aspirin and levosalbutamol.

On 16 February 2010, seven days after the start of investigational product, the subject developed grade 3 or severe pneumonia and grade 3 or severe exacerbation of chronic obstructive pulmonary disease. The subject was hospitalised. Treatment with investigational product was interrupted. Labs revealed wbc elevated - white blood count

on 17 February 2010 was 23.1ul (normal range 5-10), otherwise unremarkable. Blood and sputum cultures revealed no growth. Chest X-ray 17 February 2010 revealed pneumonia. The subject was treated with methylprednisolone sodium succinate, piperacillin sodium, levofloxacin, prednisone, enoxaparin, guaiphenesin and ipratropium bromide. The events resolved on 02 March 2010. The investigator considered that there was no reasonable possibility that the pneumonia and exacerbation of chronic obstructive pulmonary disease may have been caused by investigational product.

Investigator text:

Subject notified clinic today 16 Feb 2010 at 13:00 that he was treated today 16 Feb 2010 by primary care physician and is being admitted to hospital with a diagnosis of pneumonia. No other information is available at this time. We will obtain hospital records and update as soon as possible Per medical records subject was admitted to hospital on 16 Feb 2010 with diagnosis pneumonia & chronic obstructive pulmonary disease exacerbation. Labs obtained, wbc elevated, otherwise unremarkable. Blood & sputum cultures obtained final report no growth. Subject was treated with IV antibiotics & IV solumedrol & po prednisone, aggressive bronchodilator treatments & chest vibropercussion. He responded well to treatment and was discharged home on 19 Feb 2010 in stable condition with po antibiotics & steroids .

|                      |                           |
|----------------------|---------------------------|
| Protocol Id:         | ASQ112989                 |
| Investigator Number: | 076104                    |
| Subject Number:      | 001730                    |
| Treatment Number:    | 1786                      |
| Case Id:             | B0643244B                 |
| Suspect Drugs:       | Salmeterol xinafoate      |
| Serious Events:      | Acute respiratory failure |

This 67-year-old male subject was enrolled in a blinded study for the treatment of chronic obstructive pulmonary disease. The subject received inhaled investigational product twice per day from 18 March 2010.

The subject's past medical history included 98 pack a year smoking history.

On 19 March 2010, one day after the start of investigational product, the subject developed grade 3 or severe acute respiratory failure. The subject was hospitalised. The subject had two bronchoscopies for mucus clearing purposes as well as diagnostic purposes. Subject also experienced COPD exacerbation. Treatment with investigational product was continued. The event resolved on 29 March 2010. The investigator considered that there was no reasonable possibility that the acute respiratory failure may have been caused by investigational product.

Investigator text:

Patient reason for admission changed to acute respiratory failure after records were received. Patient also treated for COPD exacerbation and several other AEs while hospitalized.

Follow up received in answered query on 25 May 2010:

The COPD exacerbation was not considered to be a SAE. The subject did not receive any treatment medications for acute respiratory failure. Bronchoscopies cleared secretions. No growth was noted.

Follow up received in answered query on 03 June 2010:

The subject did not experience any other signs and symptoms associated to the final diagnosis.

|                      |                                       |
|----------------------|---------------------------------------|
| Protocol Id:         | ASQ112989                             |
| Investigator Number: | 076104                                |
| Subject Number:      | 001746                                |
| Treatment Number:    | 1859                                  |
| Case Id:             | Z0004173A                             |
| Suspect Drugs:       | Placebo                               |
| Serious Events:      | Chronic obstructive pulmonary disease |

This 51-year-old female subject was enrolled in a blinded study for the treatment of chronic obstructive pulmonary disease. The subject received inhaled investigational product twice per day from 26 April 2010.

Medical history at the time of the event included being a current smoker.

On 06 May 2010, 10 days after the start of investigational product, the subject developed grade 3 or severe exacerbation of chronic obstructive pulmonary disease. The subject was hospitalised. The subject was treated with moxifloxacin hydrochloride, dexamethasone, methylprednisolone, Medrol and prednisone. Treatment with investigational product was continued. The event resolved on 19 May 2010. The investigator considered that there was no reasonable possibility that the exacerbation of chronic obstructive pulmonary disease may have been caused by investigational product.

Investigator text:

Patient treated with 60mg prednisone when symptoms started. Patient did not respond to outpatient therapy. Patient admitted 10 May 2010. Patient discharged on 17 May 2010 with a Medrol Dose Pack. Patient took herself off of the Medrol Dose Pack on 19 May 2010. Patient rechecked in office on 24 May 2010 and is in good condition at this time.

Follow up received in answered query on 01 June 2010: No further diagnostics was completed. The subject also experienced increased shortness of breath.

Follow-up information received 29 June 2010: The subject had no other symptoms other than the exacerbation.

## 12.2. Adverse Events Leading to Withdrawal

### Placebo

Protocol Id: ASQ112989  
Investigator Number: 068062  
Subject Number: 001206  
Treatment Number: 1186  
Case Id: Z0003239A  
Suspect Drugs: Placebo  
Serious Events: Chronic obstructive pulmonary disease

This 76-year-old female subject was enrolled in a blinded study for the treatment of chronic obstructive pulmonary disease. The subject received inhaled investigational product twice per day from 27 January 2010.

The subject was a former smoker (70 pack-year smoking history) and had a diagnosis of COPD (chronic bronchitis and emphysema) between 1-5 years. Current medical conditions identified for the subject at screening by body system were: cardiac disorders, gastrointestinal disorders, and respiratory, thoracic, and mediastinal disorders. Concomitant medications identified during the study were aspirin, omeprazole, amlodipine, and olmesartan.

On 12 February 2010, 16 days after the start of investigational product, the subject developed a protocol-defined severe exacerbation of chronic obstructive pulmonary disease. The subject was hospitalised. The subject also experienced acute shortness of breath, intermittent wheezing. Chest X-ray results were normal. On 14 February 2010 tests showed white blood cell count was 8.1 k/uL (4.8 - 10.8), pCO<sub>2</sub> was 41.0 mmHg (35 - 48) and pO<sub>2</sub> was 68.0 mmHg (83 - 108). The subject was treated with salbutamol sulphate, levofloxacin, prednisone, methylprednisolone sodium succinate and oxygen. Treatment with investigational product was discontinued on 14 February 2010 and the subject was withdrawn from the study on 22 February 2010 which is also the date the event resolved. The investigator considered that there was a reasonable possibility that the exacerbation of chronic obstructive pulmonary disease may have been caused by investigational product and that the event was possibly due to study participation.

Protocol Id: ASQ112989  
Investigator Number: 068072  
Subject Number: 001458  
Treatment Number: 1354  
Case Id: Z0003703A  
Suspect Drugs: Placebo  
Serious Events: Chronic obstructive pulmonary disease

This 66-year-old male subject was enrolled in a blinded study for the treatment of chronic obstructive pulmonary disease. The subject received inhaled investigational product twice per day from 24 February 2010.

The subject was a former smoker (52 pack-year smoking history) and had a diagnosis of COPD (emphysema) between 1-5 years. No medical conditions or concomitant medications were identified for the subject.

On 17 March 2010, 21 days after the start of investigational product, the subject developed a protocol-defined severe exacerbation of chronic obstructive pulmonary disease. The subject also experienced extreme shortness of breath that was not relieved by the administration of investigational product. The subject was hospitalised on 21 March 2010 and was released on 23 March 2010. Chest X-ray showed COPD lung changes without pneumothorax or consolidation, ECG showed no clinically significant results. On 21 March 2010, laboratory test results showed troponin I 0.051 ng/ml (normal range 0.00 - 0.034), creatine phosphokinase MB 3.2 ng/ml (0.0 - 4.2), INR 1.1 (0.8 - 1.2) and prothrombin time 10.5 seconds (9.0 - 12.0). The subject was treated with methylprednisolone sodium succinate, salbutamol sulphate, levofloxacin, ipratropium bromide, methylprednisolone, pantoprazole, aspirin and enoxaparin. Treatment with investigational product placebo was discontinued on 21 March 2010 and the subject was withdrawn from the study on 23 March 2010. The event resolved on 05 April 2010. The investigator considered that there was a reasonable possibility that the exacerbation of chronic obstructive pulmonary disease may have been caused by investigational product.

Protocol Id: ASQ112989  
Investigator Number: 194755  
Subject Number: 8  
Suspect Drugs: Placebo  
AE(s) leading to withdrawal: Respiratory tract infection

This 76-year-old Caucasian female developed a respiratory tract infection of moderate intensity on 23 March 2010, 7 days after receiving placebo treatment BID from 17 March 2010. Study treatment was discontinued on 27 March 2010 and the subject was withdrawn from the study. The event had not resolved at the time of reporting. The investigator concluded that the event was not related to study treatment.

### Salmeterol

Protocol Id: ASQ112989  
Investigator Number: 017249  
Subject Number: 1327  
Suspect Drugs: salmeterol xinafoate  
AE(s) leading to withdrawal: Dyspnea, respiratory tract congestion

This 67-year-old African American male developed respiratory tract congestion and dyspnea of moderate intensity on 27 March 2010, 3 days after receiving SAL 50 BID from 25 March 2010. Study treatment was discontinued on 27 March 2010 and the

ASQ112989

subject was withdrawn from the study. The events resolved on 29 March 2010 and the investigator concluded that there was a reasonable possibility that the events were related to study treatment.

Protocol Id: ASQ112989  
 Investigator Number: 017249  
 Subject Number: 1343  
 Suspect Drugs: salmeterol xinafoate  
 AE(s) leading to withdrawal: Dyspnea

This 62-year-old Caucasian female developed mild dyspnea on 15 May 2010, 27 days after receiving SAL 50 BID from 19 April 2010. Study treatment was discontinued on 14 May 2010 and the subject was withdrawn from the study. The event resolved on 25 May 2010 and the investigator concluded that there was a reasonable possibility that the event was related to study treatment.

Protocol Id: ASQ112989  
 Investigator Number: 155967  
 Subject Number: 772  
 Suspect Drugs: salmeterol xinafoate  
 AE(s) leading to withdrawal: Lip swelling

This 70-year-old Caucasian female developed lip swelling of severe intensity on 10 March 2010, 2 days after receiving SAL 50 BID from 09 March 2010. Study treatment was discontinued on 18 March 2010 and the subject was withdrawn from the study. The event resolved on 01 April 2010 and the investigator concluded that there was a reasonable possibility that the event was related to study treatment.

**Fluticasone Propionate/ Salmeterol Combination**

Protocol Id: ASQ112989  
 Investigator Number: 074894  
 Subject Number: 000018  
 Treatment Number: 1803  
 Case Id: Z0004630A  
 Suspect Drugs: Fluticasone propionate+salmeterol xinafoate  
 Serious Events: Respiratory failure

This 72-year-old female subject was enrolled in a blinded study for the treatment of chronic obstructive pulmonary disease. The subject received inhaled investigational product twice per day from 07 May 2010.

The subject was a former smoker (57 pack-year smoking history) and had a diagnosis of COPD (emphysema) between 10-15 years. Current medical conditions identified for the subject at screening by body system were: musculoskeletal and connective tissue disorders and nervous system disorders. Concomitant medications identified during the study were calcium, aspirin, vitamin E, vitamin D, multi-vitamin, alendronate, ropinirole, and trazodone.

On 11 June 2010, 35 days after the start of investigational product, the subject developed severe respiratory failure. The event was life-threatening. The subject also experienced worsening of shortness of breath. The subject was treated with salbutamol sulphate. Subject was transported to ED by EMS, en-route treatment provided mild relief. ED notes indicate rapid worsening, nothing providing relief. The hospital site of demise informs that no autopsy was performed. Diagnostic assessments: Blood pH 7.22 (7.35-7.45); pCO<sub>2</sub> 93mmHg (35.0-45.0); pO<sub>2</sub> 103mmHg (75.0-100.0); bicarbonate 37mmol/L (22.0-26.0); base excess 8.1mmol/L (0-3), this information concerns the event Respiratory Failure, and moreover at least adjunct instigator of the event Cardio respiratory arrest. The last dose of investigational product was on 10 June 2010. No action on IP administration took place. Subject administered all IP doses as prescribed. The investigator confirmed that respiratory failure was the primary SAE, with cardiorespiratory arrest as the outcome. Subject was withdrawn from the study on 11 June 2010. The subject died on 11 June 2010 due to respiratory failure. An autopsy was not performed. The investigator considered that there was no reasonable possibility that the respiratory failure may have been caused by investigational product.

|                      |                                                                                                |
|----------------------|------------------------------------------------------------------------------------------------|
| Protocol Id:         | ASQ112989                                                                                      |
| Investigator Number: | 068039                                                                                         |
| Subject Number:      | 000372                                                                                         |
| Treatment Number:    | 1297                                                                                           |
| Case Id:             | Z0004593A                                                                                      |
| Suspect Drugs:       | Cocaine, Cocaine, Fluticasone propionate+salmeterol xinafoate, Lortab, Oxycodone hydrochloride |
| Serious Events:      | Suicide attempt                                                                                |

This 51-year-old male subject was enrolled in a blinded study for the treatment of chronic obstructive pulmonary disease. The subject received inhaled investigational product twice per day from 03 May 2010.

The subject was a current smoker (41 pack-year smoking history) and had a diagnosis of COPD (chronic bronchitis and emphysema) between 1-5 years. Current medical conditions identified for the subject at screening by body system were: musculoskeletal and connective tissue disorders. Medical conditions at the time of the event included depression. Concomitant medications identified during the study were aprazolam, buprenorphine hydrochloride, and oxygen.

On 04 June 2010, 32 days after the start of investigational product, the subject attempted suicide with a plan to shoot himself. The event was life-threatening. Subject reported to psychiatrist use of crack, cocaine, lortab, and oxycodone hydrochloride for the past two months. Last use was on 03 JUN 2010. Subject was treated at center for 10 days. Subject received treatment at Behavioral Health Center. No diagnostic tests performed. The event resolved on 14 June 2010. Subject was discharged home. Subject had a family history of mental illness and suicide attempt in parental grandmother. Daughter has history of substance abuse. Treatment with investigational product was discontinued on 15 June 2010. Subject was withdrawn from the study on 16 June 2010. The investigator considered that there was no reasonable possibility that the attempted suicide may have been caused by investigational product and that the event was possibly due to the concomitant medication, cocaine, oxycodone hydrochloride, "crack" and Lortab.



CONFIDENTIAL

ASQ112989

1  
2  
3 Protocol Id: ASQ112989  
4 Investigator Number: 006948  
5 Subject Number: 1303  
6 Suspect Drugs: Fluticasone propionate+salmeterol xinafoate  
7 AE(s) leading to withdrawal: Acute sinusitis  
8  
9

10  
11 This 64-year-old Caucasian male developed acute sinusitis of moderate intensity on 16  
12 February 2010, 13 days after receiving FSC 250/50 BID from 04 February 2010. Study  
13 treatment was discontinued on 26 February 2010 and the subject was withdrawn from the  
14 study. The event resolved on 05 March 2010 and the investigator concluded that the  
15 event was not related to study treatment.  
16

17  
18 Protocol Id: ASQ112989  
19 Investigator Number: 009595  
20 Subject Number: 221  
21 Suspect Drugs: Fluticasone propionate+salmeterol xinafoate  
22 AE(s) leading to withdrawal: Candidiasis  
23  
24

25  
26 This 44-year-old Caucasian male developed candidiasis of moderate intensity on 05  
27 March 2010, 18 days after receiving FSC 250/50 BID from 16 February 2010. Study  
28 treatment was discontinued on 05 March 2010 and the subject was withdrawn from the  
29 study. The event resolved on 13 March 2010 and the investigator concluded that there  
30 was a reasonable possibility that the event was related to study treatment.  
31

32  
33 Protocol Id: ASQ112989  
34 Investigator Number: 017249  
35 Subject Number: 1325  
36 Suspect Drugs: Fluticasone propionate+salmeterol xinafoate  
37 AE(s) leading to withdrawal: Dyspnea, pharyngitis  
38  
39

40  
41 This 64-year-old Caucasian female developed dyspnea and pharyngitis of moderate  
42 intensity on 24 March 2010, 6 days after receiving FSC 250/50 BID from 19 March  
43 2010. Study treatment was discontinued on 24 March 2010 and the subject was  
44 withdrawn from the study. Both events resolved on 24 March 2010 and the investigator  
45 concluded that the event was not related to study treatment.  
46

47  
48 Protocol Id: ASQ112989  
49 Investigator Number: 018980  
50 Subject Number: 52  
51 Suspect Drugs: Fluticasone propionate+salmeterol xinafoate  
52 AE(s) leading to withdrawal: Irritability  
53  
54  
55  
56  
57  
58  
59  
60

1  
2  
3 This 58-year-old Caucasian female developed irritability of moderate intensity on 03  
4 December 2010, 4 days after receiving FSC 250/50 BID from 30 November 2009. Study  
5 treatment was discontinued on 31 December 2009 and the subject was withdrawn from  
6 the study. The event resolved on 04 January 2010 and the investigator concluded that  
7 there was a reasonable possibility that the event was related to study treatment.  
8

9  
10 Protocol Id: ASQ112989  
11 Investigator Number: 067189  
12 Subject Number: 105  
13 Suspect Drugs: Fluticasone propionate+salmeterol xinafoate  
14 AE(s) leading to withdrawal: Lung neoplasm  
15  
16

17  
18 This 66-year-old Caucasian male was discovered to have a lung neoplasm of severe  
19 intensity on 05 January 2010, 14 days after receiving FSC 250/50 BID from 23  
20 December 2009. Study treatment was discontinued on 07 January 2010 and the subject  
21 was withdrawn from the study. The event was considered to be resolving at the time the  
22 subject was withdrawn and the investigator concluded that the event was not related to  
23 study treatment.  
24  
25  
26  
27  
28  
29  
30  
31  
32  
33  
34  
35  
36  
37  
38  
39  
40  
41  
42  
43  
44  
45  
46  
47  
48  
49  
50  
51  
52  
53  
54  
55  
56  
57  
58  
59  
60

Protocol: ASQ112989  
 Population: All Subjects Enrolled

Page 1 of 1

Table 1.01  
 Summary of Study Populations

| Population                   | Placebo   | SAL 50mcg BID | FSC 250/50mcg BID | Total      |
|------------------------------|-----------|---------------|-------------------|------------|
| All Subjects Enrolled        |           |               |                   | 547        |
| Run-in                       |           |               |                   | 418        |
| Randomised                   | 75        | 152           | 139               | 366        |
| Modified intent-to-treat [1] | 75 (100%) | 151 (>99%)    | 139 (100%)        | 365 (>99%) |

75

For peer review only

Note: One subject was randomised to SAL 50mcg but refused to take his study medication and is therefore excluded from the MITT population.

[1] Percentages are based on the number of subjects randomised.

dln73797: /arenv/arprod/ccil8781\_gr33343/asq112989/final/drivers/pp\_t001.sas 23AUG2010 18:43

CONFIDENTIAL

ASQ112989

Protocol: ASQ112989  
Population: All Subjects Enrolled

Table 1.02  
Summary of Attendance at Each Clinic Visit

| Visit               | Screen failure (N=129) | Run-in failure (N=52) | Placebo (N=75) | SAL 50mcg BID (N=152) | FSC 250/50mcg BID (N=139) | Total (N=547) |
|---------------------|------------------------|-----------------------|----------------|-----------------------|---------------------------|---------------|
| Screening (Visit 1) | 129 (100%)             | 52 (100%)             | 75 (100%)      | 152 (100%)            | 139 (100%)                | 547 (100%)    |
| Visit 2             |                        | 52 (100%)             | 75 (100%)      | 152 (100%)            | 139 (100%)                | 418 (76%)     |
| Visit 3/PD          |                        |                       | 75 (100%)      | 151 (>99%)            | 139 (100%)                | 365 (67%)     |

76

For peer review only

CONFIDENTIAL

ASQ112989

dln73797: /arenv/arprod/ccil8781\_gr33343/asq112989/final/drivers/vi\_t001.sas 23AUG2010 18:39

Protocol: ASQ112989  
 Population: All Subjects Enrolled

Page 1 of 1

Table 1.03  
 Summary of Screen Failures

|                                           | Total<br>(N=547) |
|-------------------------------------------|------------------|
| -----                                     |                  |
| Screening Status                          |                  |
| Entered run-in                            | 418 (76%)        |
| Failed                                    | 129 (24%)        |
| Reason for failure                        |                  |
| Exacerbation                              | 1 (<1%)          |
| Did not meet inclusion/exclusion criteria | 126 (23%)        |
| Adverse event (unspecified)               | 0                |
| Investigator discretion                   | 1 (<1%)          |
| Withdrew consent                          | 1 (<1%)          |

Note: Subjects may have more than one reason for failure.  
 dln73797: /arenv/arprod/ccil8781\_gr33343/asq112989/final/drivers/ds\_t002\_scrn.sas 27JUL2010 20:10

1  
2  
3  
4  
5  
6  
7  
8  
9  
10  
11  
12  
13  
14  
15  
16  
17  
18  
19  
20  
21  
22  
23  
24  
25  
26  
27  
28  
29  
30  
31  
32  
33  
34  
35  
36  
37  
38  
39  
40  
41  
42  
43  
44  
45  
46  
47  
48  
49

77

Protocol: ASQ112989  
Population: Run-in

Table 1.04  
Summary of Run-In Failures

|                                    | Total<br>(N=418) |
|------------------------------------|------------------|
| Run-in Status                      |                  |
| Randomised                         | 366 (88%)        |
| Failed                             | 52 (12%)         |
| Reason for failure                 |                  |
| Adverse Event                      | 8 (2%)           |
| Protocol deviation                 | 5 (1%)           |
| Study closed/terminated            | 2 (<1%)          |
| Lost to follow-up                  | 3 (<1%)          |
| Investigator discretion            | 10 (2%)          |
| Withdrew consent                   | 10 (2%)          |
| Did not meet continuation criteria | 14 (3%)          |

78

CONFIDENTIAL

ASQ112989

dln73797: /arenv/arprod/ccil8781\_gr33343/asq112989/final/drivers/ds\_t003\_run.sas 27JUL2010 20:09

Protocol: ASQ112989  
 Population: Modified Intent-to-treat

Page 1 of 1

Table 1.05  
 Summary of Subject Disposition

|                                   | Placebo<br>(N=75) | SAL 50mcg<br>BID<br>(N=151) | FSC<br>250/50mcg<br>BID<br>(N=139) | Total<br>(N=365) |
|-----------------------------------|-------------------|-----------------------------|------------------------------------|------------------|
| -----                             |                   |                             |                                    |                  |
| Completion Status                 |                   |                             |                                    |                  |
| Completed                         | 69 (92%)          | 141 (93%)                   | 126 (91%)                          | 336 (92%)        |
| Withdrawn                         | 6 (8%)            | 10 (7%)                     | 13 (9%)                            | 29 (8%)          |
| Primary*/subreason for withdrawal |                   |                             |                                    |                  |
| Adverse Event                     | 3 (4%)            | 3 (2%)                      | 7 (5%)                             | 13 (4%)          |
| Lack of efficacy                  | 2 (3%)            | 0                           | 1 (<1%)                            | 3 (<1%)          |
| Protocol deviation                | 0                 | 0                           | 4 (3%)                             | 4 (1%)           |
| Study closed/terminated           | 0                 | 1 (<1%)                     | 0                                  | 1 (<1%)          |
| Lost to follow-up                 | 0                 | 0                           | 0                                  | 0                |
| Investigator discretion           | 0                 | 0                           | 0                                  | 0                |
| Withdrew consent                  | 1 (1%)            | 6 (4%)                      | 1 (<1%)                            | 8 (2%)           |

\* Subjects may have only one primary reason for withdrawal.

dln73797: /arenv/arprod/ccil18781\_gr33343/asq112989/final/drivers/ds\_t001.sas 27JUL2010 20:09

79

1  
2  
3  
4  
5  
6  
7  
8  
9  
10  
11  
12  
13  
14  
15  
16  
17  
18  
19  
20  
21  
22  
23  
24  
25  
26  
27  
28  
29  
30  
31  
32  
33  
34  
35  
36  
37  
38  
39  
40  
41  
42  
43  
44  
45  
46  
47  
48  
49

Protocol: ASQ112989  
Population: All Subjects Enrolled

Page 1 of 2

Table 1.06  
Summary of Number of Subjects by Centre

| Country Investigator | Screen failure (N=129) | Run-in failure (N=52) | Placebo (N=75) | SAL 50mcg BID (N=152) | FSC 250/50mcg BID (N=139) | Total (N=547) |
|----------------------|------------------------|-----------------------|----------------|-----------------------|---------------------------|---------------|
| USA                  | 129 (100%)             | 52 (100%)             | 75 (100%)      | 152 (100%)            | 139 (100%)                | 547 (100%)    |
| Abboy                | 0                      | 4 (8%)                | 3 (4%)         | 6 (4%)                | 5 (4%)                    | 18 (3%)       |
| Baker                | 3 (2%)                 | 0                     | 0              | 0                     | 0                         | 3 (<1%)       |
| Bernstein            | 1 (<1%)                | 0                     | 3 (4%)         | 6 (4%)                | 6 (4%)                    | 16 (3%)       |
| Boscia               | 4 (3%)                 | 3 (6%)                | 3 (4%)         | 5 (3%)                | 6 (4%)                    | 21 (4%)       |
| Bruya                | 1 (<1%)                | 1 (2%)                | 1 (1%)         | 4 (3%)                | 4 (3%)                    | 11 (2%)       |
| Chinsky              | 13 (10%)               | 0                     | 3 (4%)         | 7 (5%)                | 8 (6%)                    | 31 (6%)       |
| Criner               | 13 (10%)               | 2 (4%)                | 2 (3%)         | 0                     | 2 (1%)                    | 19 (3%)       |
| Elliott              | 13 (10%)               | 2 (4%)                | 1 (1%)         | 3 (2%)                | 1 (<1%)                   | 20 (4%)       |
| Erb                  | 2 (2%)                 | 3 (6%)                | 4 (5%)         | 8 (5%)                | 8 (6%)                    | 25 (5%)       |
| Feldman              | 3 (2%)                 | 5 (10%)               | 6 (8%)         | 10 (7%)               | 11 (8%)                   | 35 (6%)       |
| Fogarty              | 1 (<1%)                | 2 (4%)                | 4 (5%)         | 7 (5%)                | 7 (5%)                    | 21 (4%)       |
| Given                | 4 (3%)                 | 1 (2%)                | 1 (1%)         | 3 (2%)                | 1 (<1%)                   | 10 (2%)       |
| Gutmann              | 5 (4%)                 | 1 (2%)                | 1 (1%)         | 2 (1%)                | 0                         | 9 (2%)        |
| Haft                 | 3 (2%)                 | 0                     | 2 (3%)         | 4 (3%)                | 2 (1%)                    | 11 (2%)       |
| Hampel, Jr           | 4 (3%)                 | 1 (2%)                | 2 (3%)         | 4 (3%)                | 3 (2%)                    | 14 (3%)       |
| Harris               | 2 (2%)                 | 2 (4%)                | 1 (1%)         | 2 (1%)                | 3 (2%)                    | 10 (2%)       |
| Heyder               | 0                      | 0                     | 2 (3%)         | 3 (2%)                | 3 (2%)                    | 8 (1%)        |
| Hyers                | 1 (<1%)                | 0                     | 1 (1%)         | 3 (2%)                | 4 (3%)                    | 9 (2%)        |
| Johnson Jr.          | 3 (2%)                 | 0                     | 2 (3%)         | 5 (3%)                | 4 (3%)                    | 14 (3%)       |
| Kaelin, Jr.          | 6 (5%)                 | 2 (4%)                | 2 (3%)         | 5 (3%)                | 4 (3%)                    | 19 (3%)       |
| Kleerup              | 5 (4%)                 | 2 (4%)                | 1 (1%)         | 1 (<1%)               | 1 (<1%)                   | 10 (2%)       |
| Koser                | 1 (<1%)                | 0                     | 3 (4%)         | 7 (5%)                | 6 (4%)                    | 17 (3%)       |
| Lapidus              | 4 (3%)                 | 2 (4%)                | 1 (1%)         | 3 (2%)                | 1 (<1%)                   | 11 (2%)       |
| Noonan               | 2 (2%)                 | 1 (2%)                | 1 (1%)         | 3 (2%)                | 3 (2%)                    | 10 (2%)       |
| Patel                | 9 (7%)                 | 5 (10%)               | 1 (1%)         | 2 (1%)                | 2 (1%)                    | 19 (3%)       |
| Pudi                 | 1 (<1%)                | 0                     | 2 (3%)         | 4 (3%)                | 3 (2%)                    | 10 (2%)       |
| Ray                  | 1 (<1%)                | 1 (2%)                | 1 (1%)         | 3 (2%)                | 0                         | 6 (1%)        |
| Robinette, Jr.       | 2 (2%)                 | 0                     | 2 (3%)         | 4 (3%)                | 4 (3%)                    | 12 (2%)       |
| Sachs                | 0                      | 1 (2%)                | 0              | 0                     | 0                         | 1 (<1%)       |
| Seibert              | 0                      | 1 (2%)                | 1 (1%)         | 1 (<1%)               | 2 (1%)                    | 5 (<1%)       |

dln73797: /arenv/arprod/ccil8781\_gr33343/asq112989/final/drivers/pp\_t002\_cent.sas 27JUL2010 20:09

CONFIDENTIAL

ASQ112989



Protocol: ASQ112989  
Population: All Subjects Enrolled

Page 2 of 2

Table 1.06  
Summary of Number of Subjects by Centre

| Country Investigator | Screen failure (N=129) | Run-in failure (N=52) | Placebo (N=75) | SAL 50mcg BID (N=152) | FSC 250/50mcg BID (N=139) | Total (N=547) |
|----------------------|------------------------|-----------------------|----------------|-----------------------|---------------------------|---------------|
| Sibille              | 0                      | 1 (2%)                | 2 (3%)         | 2 (1%)                | 2 (1%)                    | 7 (1%)        |
| Singh                | 1 (<1%)                | 3 (6%)                | 2 (3%)         | 3 (2%)                | 4 (3%)                    | 13 (2%)       |
| Somerville           | 6 (5%)                 | 0                     | 2 (3%)         | 0                     | 4 (3%)                    | 12 (2%)       |
| Spangenthal          | 10 (8%)                | 0                     | 2 (3%)         | 6 (4%)                | 6 (4%)                    | 24 (4%)       |
| Streit               | 0                      | 0                     | 0              | 1 (<1%)               | 0                         | 1 (<1%)       |
| Sussman              | 1 (<1%)                | 0                     | 0              | 1 (<1%)               | 2 (1%)                    | 4 (<1%)       |
| Walker               | 1 (<1%)                | 3 (6%)                | 2 (3%)         | 6 (4%)                | 4 (3%)                    | 16 (3%)       |
| Weinberg             | 1 (<1%)                | 3 (6%)                | 4 (5%)         | 8 (5%)                | 8 (6%)                    | 24 (4%)       |
| Westerman            | 1 (<1%)                | 0                     | 1 (1%)         | 2 (1%)                | 0                         | 4 (<1%)       |
| Wittmer              | 1 (<1%)                | 0                     | 3 (4%)         | 8 (5%)                | 5 (4%)                    | 17 (3%)       |

81

CONFIDENTIAL

ASQ112989

dln73797: /arenv/arprod/ccil8781\_gr33343/asq112989/final/drivers/pp\_t002\_cent.sas 27JUL2010 20:09

Protocol: ASQ112989  
 Population: All Subjects Enrolled

Page 1 of 1

Table 1.07  
 Summary of Inclusion/Exclusion/Randomisation Criteria Deviations for Screen or Run-In Failures

| Criterion                        | Total<br>(N=547) |
|----------------------------------|------------------|
| Any criteria deviations          | 156 (29%)        |
| Inclusion criteria               |                  |
| Able to use a diskus             | 1 (<1%)          |
| COPD diagnosis                   | 2 (<1%)          |
| Tobacco use                      | 1 (<1%)          |
| Severity of disease              | 102 (19%)        |
| Able to use electronic diary     | 2 (<1%)          |
| Read and write English           | 1 (<1%)          |
| Evidence of dyspnea              | 13 (2%)          |
| Exclusion criteria               |                  |
| Disallowed medication            | 2 (<1%)          |
| Unable to withhold albuterol     | 1 (<1%)          |
| COPD exacerbation                | 3 (<1%)          |
| Need nocturnal positive pressure | 2 (<1%)          |
| Unable to comply                 | 5 (<1%)          |
| Asthma                           | 1 (<1%)          |
| Other respiratory disorders      | 1 (<1%)          |
| Chest X-ray                      | 5 (<1%)          |
| Other diseases/abnormalities     | 4 (<1%)          |
| Randomisation criteria           |                  |
| COPD exacerbation                | 21 (4%)          |

Note: Some run-in failures recorded criteria deviations which were not their primary reason for run-in failure

dln73797: /arenv/arprod/ccil8781\_gr33343/asq112989/final/drivers/ie\_t001\_fail.sas 23AUG2010 18:47

Protocol: ASQ112989  
 Population: Modified Intent-to-treat

Page 1 of 1

Table 1.08  
 Summary of Inclusion/Exclusion/Randomisation Criteria Deviations

| Criterion               | Placebo<br>(N=75) | SAL 50mcg<br>BID<br>(N=151) | FSC<br>250/50mcg<br>BID<br>(N=139) | Total<br>(N=365) |
|-------------------------|-------------------|-----------------------------|------------------------------------|------------------|
| Any criteria deviations | 0                 | 2 (1%)                      | 1 (<1%)                            | 3 (<1%)          |
| Inclusion criteria      |                   |                             |                                    |                  |
| Severity of disease     | 0                 | 1 (<1%)                     | 0                                  | 1 (<1%)          |
| Exclusion criteria      |                   |                             |                                    |                  |
| Disallowed medication   | 0                 | 0                           | 1 (<1%)                            | 1 (<1%)          |
| COPD exacerbation       | 0                 | 1 (<1%)                     | 0                                  | 1 (<1%)          |

For peer review only

CONFIDENTIAL

ASQ112989

dln73797: /arenv/arprod/ccil8781\_gr33343/asq112989/final/drivers/ie\_t002.sas 27JUL2010 20:09

1  
2  
3  
4  
5  
6  
7  
8  
9  
10  
11  
12  
13  
14  
15  
16  
17  
18  
19  
20  
21  
22  
23  
24  
25  
26  
27  
28  
29  
30  
31  
32  
33  
34  
35  
36  
37  
38  
39  
40  
41  
42  
43  
44  
45  
46  
47  
48  
49

83

Protocol: ASQ112989  
Population: Modified Intent-to-treat

Table 1.09  
Summary of Protocol Deviations

| Protocol deviation                                                                                         | Placebo<br>(N=75) | SAL 50mcg<br>BID<br>(N=151) | FSC<br>250/50mcg<br>BID<br>(N=139) | Total<br>(N=365) |
|------------------------------------------------------------------------------------------------------------|-------------------|-----------------------------|------------------------------------|------------------|
| Any protocol deviation                                                                                     | 3 (4%)            | 14 (9%)                     | 9 (6%)                             | 26 (7%)          |
| Violation of inclusion/exclusion criteria                                                                  | 0                 | 2 (1%)                      | 1 (<1%)                            | 3 (<1%)          |
| Post-albuterol FEV1/FVC ratio at Screening of >=0.70                                                       | 0                 | 0                           | 1 (<1%)                            | 1 (<1%)          |
| Post-albuterol % predicted FEV1 at Screening of >70.0                                                      | 0                 | 4 (3%)                      | 2 (1%)                             | 6 (2%)           |
| Receipt of any medication specified in section 5.6.2 of the protocol, except outside the specified windows | 3 (4%)            | 10 (7%)                     | 6 (4%)                             | 19 (5%)          |

84

dln73797: /arenv/arprod/ccil8781\_gr33343/asq112989/final/drivers/pd\_t001.sas 27JUL2010 20:10

CONFIDENTIAL

ASQ112989

Protocol: ASQ112989  
Population: Run-in

Page 1 of 2

Table 1.10  
Summary of Demographic Characteristics

|             |                     | Run-in<br>failure<br>(N=52) | Placebo<br>(N=75) | SAL 50mcg<br>BID<br>(N=152) | FSC<br>250/50mcg<br>BID<br>(N=139) | Total<br>(N=418) |
|-------------|---------------------|-----------------------------|-------------------|-----------------------------|------------------------------------|------------------|
| Age (y)     | n                   | 52                          | 75                | 152                         | 139                                | 418              |
|             | Mean                | 63.8                        | 62.8              | 60.1                        | 60.2                               | 61.1             |
|             | SD                  | 9.61                        | 9.82              | 9.58                        | 9.45                               | 9.65             |
|             | Median              | 64.5                        | 63.0              | 61.0                        | 60.0                               | 62.0             |
|             | Min.                | 45                          | 46                | 41                          | 40                                 | 40               |
|             | Max.                | 84                          | 91                | 88                          | 83                                 | 91               |
| Sex         | n                   | 52                          | 75                | 152                         | 139                                | 418              |
|             | Female              | 27 (52%)                    | 29 (39%)          | 63 (41%)                    | 60 (43%)                           | 179 (43%)        |
|             | Male                | 25 (48%)                    | 46 (61%)          | 89 (59%)                    | 79 (57%)                           | 239 (57%)        |
| Ethnicity   | n                   | 52                          | 75                | 152                         | 139                                | 418              |
|             | Hispanic/Latino     | 0                           | 0                 | 1 (<1%)                     | 1 (<1%)                            | 2 (<1%)          |
|             | Not Hispanic/Latino | 52 (100%)                   | 75 (100%)         | 151 (>99%)                  | 138 (>99%)                         | 416 (>99%)       |
| Height (cm) | n                   | 51                          | 75                | 152                         | 139                                | 417              |
|             | Mean                | 169.7                       | 170.4             | 170.4                       | 170.8                              | 170.5            |
|             | SD                  | 11.60                       | 9.73              | 9.34                        | 9.84                               | 9.85             |
|             | Median              | 169.0                       | 171.0             | 172.5                       | 170.0                              | 171.0            |
|             | Min.                | 134                         | 152               | 147                         | 150                                | 134              |
|             | Max.                | 189                         | 193               | 196                         | 191                                | 196              |
| Weight (kg) | n                   | 51                          | 75                | 152                         | 139                                | 417              |
|             | Mean                | 81.58                       | 77.43             | 82.64                       | 85.22                              | 82.43            |
|             | SD                  | 21.867                      | 19.993            | 19.156                      | 24.469                             | 21.624           |
|             | Median              | 81.00                       | 76.00             | 80.90                       | 83.00                              | 80.10            |
|             | Min.                | 45.5                        | 40.8              | 45.3                        | 43.2                               | 40.8             |
|             | Max.                | 153.0                       | 136.4             | 146.0                       | 160.0                              | 160.0            |

dln73797: /arenv/arprod/ccil8781\_gr33343/asq112989/final/drivers/dm\_t001.sas 27JUL2010 20:09

CONFIDENTIAL

ASQ112989

Protocol: ASQ112989  
Population: Run-in

Table 1.10  
Summary of Demographic Characteristics

|                          |        | Run-in failure<br>(N=52) | Placebo<br>(N=75) | SAL 50mcg<br>BID<br>(N=152) | FSC<br>250/50mcg<br>BID<br>(N=139) | Total<br>(N=418) |
|--------------------------|--------|--------------------------|-------------------|-----------------------------|------------------------------------|------------------|
| BMI (kg/m <sup>2</sup> ) | n      | 51                       | 75                | 152                         | 139                                | 417              |
|                          | Mean   | 28.25                    | 26.55             | 28.45                       | 29.04                              | 28.28            |
|                          | SD     | 6.897                    | 6.131             | 6.159                       | 7.307                              | 6.680            |
|                          | Median | 27.99                    | 25.89             | 27.55                       | 28.24                              | 27.54            |
|                          | Min.   | 15.9                     | 15.0              | 16.3                        | 16.9                               | 15.0             |
|                          | Max.   | 52.3                     | 45.6              | 50.5                        | 56.7                               | 56.7             |

For peer review only

86

CONFIDENTIAL

ASQ112989

dln73797: /arenv/arprod/ccil8781\_gr33343/asq112989/final/drivers/dm\_t001.sas 27JUL2010 20:09

Protocol: ASQ112989  
 Population: Run-in

Page 1 of 1

Table 1.11  
 Summary of Race and Racial Combinations

|                                                            | Run-in failure<br>(N=52) | Placebo<br>(N=75) | SAL 50mcg<br>BID<br>(N=152) | FSC<br>250/50mcg<br>BID<br>(N=139) | Total<br>(N=418) |
|------------------------------------------------------------|--------------------------|-------------------|-----------------------------|------------------------------------|------------------|
| n                                                          | 52                       | 75                | 152                         | 139                                | 418              |
| African American/African Heritage                          | 8 (15%)                  | 9 (12%)           | 12 (8%)                     | 12 (9%)                            | 41 (10%)         |
| American Indian or Alaska Native                           | 0                        | 0                 | 0                           | 0                                  | 0                |
| Asian                                                      | 0                        | 1 (1%)            | 0                           | 0                                  | 1 (<1%)          |
| Central/South Asian Heritage                               | 0                        | 1 (1%)            | 0                           | 0                                  | 1 (<1%)          |
| Japanese/East Asian Heritage/<br>South East Asian Heritage | 0                        | 0                 | 0                           | 0                                  | 0                |
| Native Hawaiian or other Pacific<br>Islander               | 0                        | 0                 | 0                           | 0                                  | 0                |
| White                                                      | 44 (85%)                 | 65 (87%)          | 140 (92%)                   | 127 (91%)                          | 376 (90%)        |

87

dln73797: /arenv/arprod/ccil8781\_gr33343/asq112989/final/drivers/rc\_t001.sas 27JUL2010 20:09

Protocol: ASQ112989  
Population: Run-in

Page 1 of 1

Table 1.12  
Summary of Race and Racial Combination Details

|                                              | Run-in<br>failure<br>(N=52) | Placebo<br>(N=75) | SAL 50mcg<br>BID<br>(N=152) | FSC<br>250/50mcg<br>BID<br>(N=139) | Total<br>(N=418) |
|----------------------------------------------|-----------------------------|-------------------|-----------------------------|------------------------------------|------------------|
| n                                            | 52                          | 75                | 152                         | 139                                | 418              |
| African American/African Heritage            | 8 (15%)                     | 9 (12%)           | 12 (8%)                     | 12 (9%)                            | 41 (10%)         |
| American Indian or Alaska Native             | 0                           | 0                 | 0                           | 0                                  | 0                |
| Asian - Central/South Asian Heritage         | 0                           | 1 (1%)            | 0                           | 0                                  | 1 (<1%)          |
| Asian - East Asian Heritage                  | 0                           | 0                 | 0                           | 0                                  | 0                |
| Asian - Japanese Heritage                    | 0                           | 0                 | 0                           | 0                                  | 0                |
| Asian - South East Asian Heritage            | 0                           | 0                 | 0                           | 0                                  | 0                |
| Asian - Mixed Race                           | 0                           | 0                 | 0                           | 0                                  | 0                |
| Native Hawaiian or other Pacific<br>Islander | 0                           | 0                 | 0                           | 0                                  | 0                |
| White - Arabic/North African Heritage        | 1 (2%)                      | 0                 | 1 (<1%)                     | 0                                  | 2 (<1%)          |
| White - White/Caucasian/European<br>Heritage | 43 (83%)                    | 65 (87%)          | 139 (91%)                   | 127 (91%)                          | 374 (89%)        |
| White - Mixed Race                           | 0                           | 0                 | 0                           | 0                                  | 0                |
| Mixed Race                                   | 0                           | 0                 | 0                           | 0                                  | 0                |

CONFIDENTIAL

ASQ112989

dln73797: /arenv/arprod/ccil8781\_gr33343/asq112989/final/drivers/rc\_t002\_det.sas 27JUL2010 20:09



Protocol: ASQ112989  
Population: Run-in

Page 1 of 1

Table 1.13  
Summary of Current Medical Conditions

| Classification                                                      | Run-in failure (N=52) |       | Placebo (N=75) |       | SAL 50mcg BID (N=152) |       | FSC 250/50mcg BID (N=139) |        | Total (N=418) |       |
|---------------------------------------------------------------------|-----------------------|-------|----------------|-------|-----------------------|-------|---------------------------|--------|---------------|-------|
| Any Condition                                                       | 49                    | (94%) | 73             | (97%) | 149                   | (98%) | 138                       | (>99%) | 409           | (98%) |
| Blood and lymphatic system disorders                                | 5                     | (10%) | 6              | (8%)  | 15                    | (10%) | 13                        | (9%)   | 39            | (9%)  |
| Cardiac disorders                                                   | 26                    | (50%) | 48             | (64%) | 102                   | (67%) | 89                        | (64%)  | 265           | (63%) |
| Congenital, familial and genetic disorders                          | 0                     |       | 1              | (1%)  | 0                     |       | 1                         | (<1%)  | 2             | (<1%) |
| Ear and labyrinth disorders                                         | 5                     | (10%) | 9              | (12%) | 19                    | (13%) | 13                        | (9%)   | 46            | (11%) |
| Endocrine disorders                                                 | 15                    | (29%) | 12             | (16%) | 35                    | (23%) | 35                        | (25%)  | 97            | (23%) |
| Eye disorders                                                       | 19                    | (37%) | 19             | (25%) | 34                    | (22%) | 28                        | (20%)  | 100           | (24%) |
| Gastrointestinal disorders                                          | 18                    | (35%) | 29             | (39%) | 67                    | (44%) | 66                        | (47%)  | 180           | (43%) |
| General disorders and administration site conditions                | 2                     | (4%)  | 6              | (8%)  | 17                    | (11%) | 12                        | (9%)   | 37            | (9%)  |
| Hepatobiliary disorders                                             | 1                     | (2%)  | 4              | (5%)  | 5                     | (3%)  | 8                         | (6%)   | 18            | (4%)  |
| Immune system disorders                                             | 5                     | (10%) | 3              | (4%)  | 15                    | (10%) | 17                        | (12%)  | 40            | (10%) |
| Infections and infestations                                         | 0                     |       | 2              | (3%)  | 2                     | (1%)  | 2                         | (1%)   | 6             | (1%)  |
| Injury, poisoning and procedural complications                      | 0                     |       | 0              |       | 1                     | (<1%) | 0                         |        | 1             | (<1%) |
| Metabolism and nutrition disorders                                  | 7                     | (13%) | 9              | (12%) | 27                    | (18%) | 25                        | (18%)  | 68            | (16%) |
| Musculoskeletal and connective tissue disorders                     | 33                    | (63%) | 49             | (65%) | 97                    | (64%) | 95                        | (68%)  | 274           | (66%) |
| Neoplasms benign, malignant and unspecified (incl cysts and polyps) | 1                     | (2%)  | 0              |       | 4                     | (3%)  | 3                         | (2%)   | 8             | (2%)  |
| Nervous system disorders                                            | 9                     | (17%) | 15             | (20%) | 38                    | (25%) | 34                        | (24%)  | 96            | (23%) |
| Other (general)                                                     | 1                     | (2%)  | 5              | (7%)  | 9                     | (6%)  | 9                         | (6%)   | 24            | (6%)  |
| Psychiatric disorders                                               | 19                    | (37%) | 21             | (28%) | 63                    | (41%) | 47                        | (34%)  | 150           | (36%) |
| Renal and urinary disorders                                         | 6                     | (12%) | 15             | (20%) | 28                    | (18%) | 30                        | (22%)  | 79            | (19%) |
| Reproductive system and breast disorders                            | 5                     | (10%) | 11             | (15%) | 15                    | (10%) | 13                        | (9%)   | 44            | (11%) |
| Respiratory, thoracic and mediastinal disorders                     | 30                    | (58%) | 32             | (43%) | 55                    | (36%) | 53                        | (38%)  | 170           | (41%) |
| Skin and subcutaneous tissue disorders                              | 7                     | (13%) | 8              | (11%) | 17                    | (11%) | 10                        | (7%)   | 42            | (10%) |
| Vascular disorders                                                  | 10                    | (19%) | 19             | (25%) | 31                    | (20%) | 27                        | (19%)  | 87            | (21%) |

dln73797: /arenv/arprod/ccil8781\_gr33343/asq112989/final/drivers/mh\_t001\_cur.sas 27JUL2010 20:09

Protocol: ASQ112989  
Population: Run-in

Page 1 of 1

Table 1.14  
Summary of Past Medical Conditions

| Classification                                                         | Run-in<br>failure<br>(N=52) | Placebo<br>(N=75) | SAL 50mcg<br>BID<br>(N=152) | FSC<br>250/50mcg<br>BID<br>(N=139) | Total<br>(N=418) |
|------------------------------------------------------------------------|-----------------------------|-------------------|-----------------------------|------------------------------------|------------------|
| Any Condition                                                          | 32 (62%)                    | 43 (57%)          | 94 (62%)                    | 91 (65%)                           | 260 (62%)        |
| Blood and lymphatic system disorders                                   | 2 (4%)                      | 5 (7%)            | 4 (3%)                      | 3 (2%)                             | 14 (3%)          |
| Cardiac disorders                                                      | 0                           | 2 (3%)            | 1 (<1%)                     | 3 (2%)                             | 6 (1%)           |
| Ear and labyrinth disorders                                            | 0                           | 3 (4%)            | 3 (2%)                      | 1 (<1%)                            | 7 (2%)           |
| Endocrine disorders                                                    | 4 (8%)                      | 0                 | 3 (2%)                      | 3 (2%)                             | 10 (2%)          |
| Eye disorders                                                          | 6 (12%)                     | 3 (4%)            | 11 (7%)                     | 12 (9%)                            | 32 (8%)          |
| Gastrointestinal disorders                                             | 5 (10%)                     | 8 (11%)           | 15 (10%)                    | 11 (8%)                            | 39 (9%)          |
| General disorders and administration<br>site conditions                | 0                           | 1 (1%)            | 3 (2%)                      | 4 (3%)                             | 8 (2%)           |
| Hepatobiliary disorders                                                | 2 (4%)                      | 2 (3%)            | 3 (2%)                      | 6 (4%)                             | 13 (3%)          |
| Immune system disorders                                                | 0                           | 0                 | 1 (<1%)                     | 1 (<1%)                            | 2 (<1%)          |
| Infections and infestations                                            | 3 (6%)                      | 4 (5%)            | 9 (6%)                      | 7 (5%)                             | 23 (6%)          |
| Injury, poisoning and procedural<br>complications                      | 2 (4%)                      | 5 (7%)            | 5 (3%)                      | 3 (2%)                             | 15 (4%)          |
| Metabolism and nutrition disorders                                     | 0                           | 0                 | 0                           | 2 (1%)                             | 2 (<1%)          |
| Musculoskeletal and connective tissue<br>disorders                     | 7 (13%)                     | 3 (4%)            | 14 (9%)                     | 9 (6%)                             | 33 (8%)          |
| Neoplasms benign, malignant and<br>unspecified (incl cysts and polyps) | 7 (13%)                     | 14 (19%)          | 27 (18%)                    | 27 (19%)                           | 75 (18%)         |
| Nervous system disorders                                               | 1 (2%)                      | 3 (4%)            | 8 (5%)                      | 5 (4%)                             | 17 (4%)          |
| Other (general)                                                        | 1 (2%)                      | 3 (4%)            | 1 (<1%)                     | 1 (<1%)                            | 6 (1%)           |
| Psychiatric disorders                                                  | 2 (4%)                      | 0                 | 1 (<1%)                     | 5 (4%)                             | 8 (2%)           |
| Renal and urinary disorders                                            | 7 (13%)                     | 3 (4%)            | 13 (9%)                     | 14 (10%)                           | 37 (9%)          |
| Reproductive system and breast disorders                               | 15 (29%)                    | 14 (19%)          | 35 (23%)                    | 35 (25%)                           | 99 (24%)         |
| Respiratory, thoracic and mediastinal<br>disorders                     | 5 (10%)                     | 5 (7%)            | 15 (10%)                    | 7 (5%)                             | 32 (8%)          |
| Skin and subcutaneous tissue disorders                                 | 6 (12%)                     | 4 (5%)            | 13 (9%)                     | 14 (10%)                           | 37 (9%)          |
| Vascular disorders                                                     | 2 (4%)                      | 2 (3%)            | 5 (3%)                      | 7 (5%)                             | 16 (4%)          |

dln73797: /arenv/arprod/ccil8781\_gr33343/asq112989/final/drivers/mh\_t002\_pst.sas 27JUL2010 20:09

CONFIDENTIAL

ASQ112989

Protocol: ASQ112989  
 Population: Run-in

Page 1 of 1

Table 1.15  
 Summary of COPD History

|                         | Run-in failure<br>(N=52) | Placebo<br>(N=75) | SAL 50mcg<br>BID<br>(N=152) | FSC<br>250/50mcg<br>BID<br>(N=139) | Total<br>(N=418) |
|-------------------------|--------------------------|-------------------|-----------------------------|------------------------------------|------------------|
| -----                   |                          |                   |                             |                                    |                  |
| Duration of COPD        |                          |                   |                             |                                    |                  |
| n                       | 51                       | 75                | 152                         | 139                                | 417              |
| <1 year                 | 11 (22%)                 | 8 (11%)           | 19 (13%)                    | 23 (17%)                           | 61 (15%)         |
| >=1 year to <5 years    | 14 (27%)                 | 27 (36%)          | 54 (36%)                    | 46 (33%)                           | 141 (34%)        |
| >=5 years to <10 years  | 14 (27%)                 | 23 (31%)          | 47 (31%)                    | 37 (27%)                           | 121 (29%)        |
| >=10 years to <15 years | 7 (14%)                  | 5 (7%)            | 13 (9%)                     | 21 (15%)                           | 46 (11%)         |
| >=15 years to <20 years | 3 (6%)                   | 8 (11%)           | 9 (6%)                      | 9 (6%)                             | 29 (7%)          |
| >=20 years to <25 years | 2 (4%)                   | 4 (5%)            | 6 (4%)                      | 2 (1%)                             | 14 (3%)          |
| >=25 years              | 0                        | 0                 | 4 (3%)                      | 1 (<1%)                            | 5 (1%)           |
| COPD type [1]           |                          |                   |                             |                                    |                  |
| n                       | 51                       | 75                | 152                         | 138                                | 416              |
| Chronic bronchitis      | 30 (59%)                 | 43 (57%)          | 84 (55%)                    | 84 (61%)                           | 241 (58%)        |
| Emphysema               | 31 (61%)                 | 52 (69%)          | 102 (67%)                   | 90 (65%)                           | 275 (66%)        |

91

[1] Subjects can select 'Chronic bronchitis', 'Emphysema' or both  
 dln73797: /arenv/arprod/ccil8781\_gr33343/asq112989/final/drivers/dd\_t001.sas 27JUL2010 20:09

CONFIDENTIAL

ASQ112989

Protocol: ASQ112989  
Population: Run-in

Page 1 of 1

Table 1.16  
Summary of COPD Exacerbation History

|                                                                                                       | Run-in<br>failure<br>(N=52) | Placebo<br>(N=75) | SAL 50mcg<br>BID<br>(N=152) | FSC<br>250/50mcg<br>BID<br>(N=139) | Total<br>(N=418) |
|-------------------------------------------------------------------------------------------------------|-----------------------------|-------------------|-----------------------------|------------------------------------|------------------|
| -----                                                                                                 |                             |                   |                             |                                    |                  |
| Number of exacerbations in the 12 months prior to Visit 1 that:                                       |                             |                   |                             |                                    |                  |
| Were managed without oral/systemic corticosteroids and/or antibiotics (not involving hospitalisation) |                             |                   |                             |                                    |                  |
| n                                                                                                     | 51                          | 75                | 152                         | 139                                | 417              |
| 0                                                                                                     | 48 (94%)                    | 67 (89%)          | 136 (89%)                   | 129 (93%)                          | 380 (91%)        |
| 1                                                                                                     | 2 (4%)                      | 5 (7%)            | 9 (6%)                      | 4 (3%)                             | 20 (5%)          |
| 2                                                                                                     | 1 (2%)                      | 1 (1%)            | 1 (<1%)                     | 3 (2%)                             | 6 (1%)           |
| >2                                                                                                    | 0                           | 2 (3%)            | 6 (4%)                      | 3 (2%)                             | 11 (3%)          |
| Required oral/systemic corticosteroids and/or antibiotics (not involving hospitalisation)             |                             |                   |                             |                                    |                  |
| n                                                                                                     | 51                          | 75                | 152                         | 139                                | 417              |
| 0                                                                                                     | 41 (80%)                    | 62 (83%)          | 116 (76%)                   | 104 (75%)                          | 323 (77%)        |
| 1                                                                                                     | 8 (16%)                     | 9 (12%)           | 23 (15%)                    | 23 (17%)                           | 63 (15%)         |
| 2                                                                                                     | 2 (4%)                      | 3 (4%)            | 8 (5%)                      | 8 (6%)                             | 21 (5%)          |
| >2                                                                                                    | 0                           | 1 (1%)            | 5 (3%)                      | 4 (3%)                             | 10 (2%)          |
| Required hospitalisation                                                                              |                             |                   |                             |                                    |                  |
| n                                                                                                     | 51                          | 75                | 152                         | 139                                | 417              |
| 0                                                                                                     | 48 (94%)                    | 73 (97%)          | 143 (94%)                   | 132 (95%)                          | 396 (95%)        |
| 1                                                                                                     | 3 (6%)                      | 2 (3%)            | 7 (5%)                      | 7 (5%)                             | 19 (5%)          |
| 2                                                                                                     | 0                           | 0                 | 2 (1%)                      | 0                                  | 2 (<1%)          |
| >2                                                                                                    | 0                           | 0                 | 0                           | 0                                  | 0                |

dlm73797: /arenv/arprod/ccil8781\_gr33343/asq112989/final/drivers/dd\_t002.sas 27JUL2010 20:11

CONFIDENTIAL

ASQ112989

Protocol: ASQ112989  
Population: Run-in

Page 1 of 1

Table 1.17  
Summary of History of Tobacco Use

|                    | Run-in<br>(N=52) | Placebo<br>(N=75) | SAL 50mcg BID<br>(N=152) | FSC 250/50mcg<br>BID<br>(N=139) | Total<br>(N=418) |
|--------------------|------------------|-------------------|--------------------------|---------------------------------|------------------|
| -----              |                  |                   |                          |                                 |                  |
| Smoking status     |                  |                   |                          |                                 |                  |
| n                  | 51               | 75                | 152                      | 139                             | 417              |
| Current smoker     | 29 (57%)         | 46 (61%)          | 99 (65%)                 | 84 (60%)                        | 258 (62%)        |
| Former smoker      | 22 (43%)         | 29 (39%)          | 53 (35%)                 | 55 (40%)                        | 159 (38%)        |
| Years smoked       |                  |                   |                          |                                 |                  |
| n                  | 51               | 75                | 152                      | 139                             | 417              |
| Mean               | 39.5             | 40.7              | 39.4                     | 38.8                            | 39.5             |
| SD                 | 11.34            | 9.27              | 10.69                    | 10.23                           | 10.36            |
| Median             | 40.0             | 40.0              | 40.0                     | 40.0                            | 40.0             |
| Min.               | 12               | 18                | 10                       | 8                               | 8                |
| Max.               | 70               | 57                | 69                       | 63                              | 70               |
| Cigarettes/day     |                  |                   |                          |                                 |                  |
| n                  | 51               | 75                | 152                      | 139                             | 417              |
| Mean               | 26.7             | 28.6              | 27.7                     | 27.4                            | 27.7             |
| SD                 | 13.16            | 13.37             | 13.03                    | 12.66                           | 12.95            |
| Median             | 20.0             | 24.0              | 20.0                     | 20.0                            | 20.0             |
| Min.               | 6                | 10                | 10                       | 6                               | 6                |
| Max.               | 60               | 100               | 80                       | 80                              | 100              |
| Smoking pack years |                  |                   |                          |                                 |                  |
| n                  | 51               | 75                | 152                      | 139                             | 417              |
| Mean               | 53.2             | 57.8              | 55.3                     | 53.7                            | 54.9             |
| SD                 | 35.18            | 28.28             | 32.67                    | 30.55                           | 31.47            |
| Median             | 48.0             | 52.0              | 48.0                     | 47.0                            | 50.0             |
| Min.               | 12               | 14                | 12                       | 11                              | 11               |
| Max.               | 210              | 180               | 184                      | 189                             | 210              |

Note: Former smokers who stopped smoking within 6 months prior to Visit 1 have been re-classified as current smokers.

dln73797: /arenv/arprod/ccil8781\_gr33343/asq112989/final/drivers/su\_t001.sas 27JUL2010 20:11

CONFIDENTIAL

ASQ112989

Protocol: ASQ112989  
Population: Run-in

Page 1 of 2

Table 1.18  
Summary of Screening Lung Function

|                         |        | Run-in<br>failure<br>(N=52) | Placebo<br>(N=75) | SAL 50mcg<br>BID<br>(N=152) | FSC<br>250/50mcg<br>BID<br>(N=139) | Total<br>(N=418) |
|-------------------------|--------|-----------------------------|-------------------|-----------------------------|------------------------------------|------------------|
| Pre-albuterol FEV1 (L)  | n      | 51                          | 75                | 152                         | 139                                | 417              |
|                         | Mean   | 1.337                       | 1.288             | 1.395                       | 1.373                              | 1.361            |
|                         | SD     | 0.5230                      | 0.5044            | 0.5080                      | 0.5338                             | 0.5175           |
|                         | Median | 1.280                       | 1.210             | 1.340                       | 1.360                              | 1.310            |
|                         | Min.   | 0.41                        | 0.44              | 0.56                        | 0.41                               | 0.41             |
|                         | Max.   | 2.52                        | 3.05              | 2.72                        | 3.00                               | 3.05             |
| Post-albuterol FEV1 (L) | n      | 51                          | 75                | 152                         | 139                                | 417              |
|                         | Mean   | 1.425                       | 1.469             | 1.536                       | 1.532                              | 1.509            |
|                         | SD     | 0.5131                      | 0.5346            | 0.5206                      | 0.5554                             | 0.5337           |
|                         | Median | 1.360                       | 1.430             | 1.515                       | 1.510                              | 1.480            |
|                         | Min.   | 0.49                        | 0.47              | 0.46                        | 0.30                               | 0.30             |
|                         | Max.   | 2.56                        | 3.23              | 3.06                        | 3.15                               | 3.23             |
| Pre-albuterol FVC (L)   | n      | 51                          | 75                | 152                         | 139                                | 417              |
|                         | Mean   | 2.624                       | 2.586             | 2.726                       | 2.595                              | 2.645            |
|                         | SD     | 0.8422                      | 0.7843            | 0.8228                      | 0.8609                             | 0.8308           |
|                         | Median | 2.500                       | 2.510             | 2.565                       | 2.460                              | 2.520            |
|                         | Min.   | 0.88                        | 1.11              | 1.15                        | 0.80                               | 0.80             |
|                         | Max.   | 5.37                        | 4.57              | 4.62                        | 4.98                               | 5.37             |
| Post-albuterol FVC (L)  | n      | 51                          | 75                | 152                         | 139                                | 417              |
|                         | Mean   | 2.771                       | 2.873             | 2.956                       | 2.863                              | 2.887            |
|                         | SD     | 0.9286                      | 0.8926            | 0.8369                      | 0.8719                             | 0.8691           |
|                         | Median | 2.660                       | 2.810             | 2.850                       | 2.750                              | 2.810            |
|                         | Min.   | 0.70                        | 1.17              | 1.12                        | 1.14                               | 0.70             |
|                         | Max.   | 5.62                        | 5.41              | 4.78                        | 5.15                               | 5.62             |

Note: One subject recorded an FEV1=1.99L and FVC=0.7L and hence an FEV1/FVC ratio of 248%.  
One subject recorded a pre-albuterol FEV1=30L and a post-albuterol FEV1=0.3L, hence a reversibility of -90%/-2700mL. These data may not be valid.

dln73797: /arenv/arprod/ccil8781\_gr33343/asq112989/final/drivers/pf\_t001\_scr.sas 23AUG2010 18:52

CONFIDENTIAL

ASQ112989

Protocol: ASQ112989  
Population: Run-in

Page 2 of 2

Table 1.18  
Summary of Screening Lung Function

|                                     |        | Run-in failure (N=52) | Placebo (N=75) | SAL 50mcg BID (N=152) | FSC 250/50mcg BID (N=139) | Total (N=418) |
|-------------------------------------|--------|-----------------------|----------------|-----------------------|---------------------------|---------------|
| % predicted post-albuterol FEV1 (%) | n      | 51                    | 75             | 152                   | 139                       | 417           |
|                                     | Mean   | 50.3                  | 49.4           | 50.2                  | 49.5                      | 49.9          |
|                                     | SD     | 15.07                 | 13.10          | 13.77                 | 13.69                     | 13.75         |
|                                     | Median | 53.8                  | 49.5           | 52.6                  | 52.0                      | 52.0          |
|                                     | Min.   | 20                    | 16             | 14                    | 9                         | 9             |
|                                     | Max.   | 70                    | 70             | 74                    | 80                        | 80            |
| FEV1/FVC (%)                        | n      | 51                    | 75             | 152                   | 139                       | 417           |
|                                     | Mean   | 55.7                  | 51.6           | 52.2                  | 53.7                      | 53.0          |
|                                     | SD     | 35.19                 | 11.39          | 10.88                 | 11.36                     | 16.10         |
|                                     | Median | 53.3                  | 52.4           | 52.4                  | 55.8                      | 53.8          |
|                                     | Min.   | 24                    | 29             | 26                    | 7                         | 7             |
|                                     | Max.   | 284                   | 70             | 69                    | 78                        | 284           |
| Reversibility to albuterol (%)      | n      | 51                    | 75             | 152                   | 139                       | 417           |
|                                     | Mean   | 8.6                   | 16.7           | 11.7                  | 14.5                      | 13.1          |
|                                     | SD     | 14.38                 | 19.21          | 13.91                 | 18.53                     | 16.76         |
|                                     | Median | 7.1                   | 13.3           | 10.5                  | 12.1                      | 11.4          |
|                                     | Min.   | -20                   | -12            | -36                   | -90                       | -90           |
|                                     | Max.   | 66                    | 105            | 64                    | 73                        | 105           |
| Reversibility to albuterol (mL)     | n      | 51                    | 75             | 152                   | 139                       | 417           |
|                                     | Mean   | 87.8                  | 180.4          | 141.3                 | 158.8                     | 147.6         |
|                                     | SD     | 165.13                | 192.86         | 173.74                | 308.55                    | 230.48        |
|                                     | Median | 90.0                  | 150.0          | 125.0                 | 170.0                     | 130.0         |
|                                     | Min.   | -390                  | -200           | -680                  | -2700                     | -2700         |
|                                     | Max.   | 610                   | 810            | 530                   | 980                       | 980           |

Note: One subject recorded an FEV1=1.99L and FVC=0.7L and hence an FEV1/FVC ratio of 248%.  
One subject recorded a pre-albuterol FEV1=30L and a post-albuterol FEV1=0.3L, hence a reversibility of -90%/-2700mL. These data may not be valid.

dln73797: /arenv/arprod/ccil18781\_gr33343/asq112989/final/drivers/pf\_t001\_scr.sas 23AUG2010 18:52

CONFIDENTIAL

ASQ112989

Protocol: ASQ112989  
Population: Run-in

Page 1 of 2

Table 1.19  
Summary of COPD Medications Taken Before the Run-in

| Ingredient                   | Run-in<br>Failure<br>(N=52) | Placebo<br>(N=75) | SAL 50mcg<br>BID<br>(N=152) | FSC<br>250/50mcg<br>BID<br>(N=139) | Total<br>(N=418) |
|------------------------------|-----------------------------|-------------------|-----------------------------|------------------------------------|------------------|
| Any medication               | 38 (73%)                    | 60 (80%)          | 115 (76%)                   | 110 (79%)                          | 323 (77%)        |
| SALBUTAMOL                   | 20 (38%)                    | 37 (49%)          | 83 (55%)                    | 68 (49%)                           | 208 (50%)        |
| IPRATROPIUM BROMIDE          | 11 (21%)                    | 16 (21%)          | 25 (16%)                    | 26 (19%)                           | 78 (19%)         |
| SALBUTAMOL SULFATE           | 13 (25%)                    | 13 (17%)          | 21 (14%)                    | 23 (17%)                           | 70 (17%)         |
| TIOTROPIUM BROMIDE           | 4 (8%)                      | 15 (20%)          | 17 (11%)                    | 30 (22%)                           | 66 (16%)         |
| PROAIR (NOS)                 | 6 (12%)                     | 4 (5%)            | 10 (7%)                     | 8 (6%)                             | 28 (7%)          |
| FORMOTEROL FUMARATE          | 0                           | 4 (5%)            | 9 (6%)                      | 8 (6%)                             | 21 (5%)          |
| SALMETEROL XINAFOATE         | 7 (13%)                     | 2 (3%)            | 5 (3%)                      | 5 (4%)                             | 19 (5%)          |
| FLUTICASONE PROPIONATE       | 6 (12%)                     | 2 (3%)            | 5 (3%)                      | 5 (4%)                             | 18 (4%)          |
| OXYGEN                       | 1 (2%)                      | 3 (4%)            | 9 (6%)                      | 3 (2%)                             | 16 (4%)          |
| EPINEPHRINE                  | 2 (4%)                      | 3 (4%)            | 0                           | 3 (2%)                             | 8 (2%)           |
| GUAIFENESIN                  | 0                           | 1 (1%)            | 1 (<1%)                     | 6 (4%)                             | 8 (2%)           |
| THEOPHYLLINE                 | 0                           | 2 (3%)            | 1 (<1%)                     | 4 (3%)                             | 7 (2%)           |
| MONTELUKAST SODIUM           | 0                           | 2 (3%)            | 1 (<1%)                     | 2 (1%)                             | 5 (1%)           |
| FLUTICASONE                  | 0                           | 0                 | 3 (2%)                      | 1 (<1%)                            | 4 (<1%)          |
| SALMETEROL                   | 0                           | 0                 | 3 (2%)                      | 1 (<1%)                            | 4 (<1%)          |
| BUDESONIDE                   | 0                           | 1 (1%)            | 2 (1%)                      | 0                                  | 3 (<1%)          |
| IPRATROPIUM                  | 2 (4%)                      | 0                 | 0                           | 1 (<1%)                            | 3 (<1%)          |
| LEVOSALBUTAMOL HYDROCHLORIDE | 1 (2%)                      | 0                 | 1 (<1%)                     | 1 (<1%)                            | 3 (<1%)          |
| PREDNISONE                   | 0                           | 0                 | 1 (<1%)                     | 2 (1%)                             | 3 (<1%)          |
| ACETYLSALICYLIC ACID         | 1 (2%)                      | 0                 | 1 (<1%)                     | 0                                  | 2 (<1%)          |
| BECLOMETASONE DIPROPIONATE   | 0                           | 1 (1%)            | 1 (<1%)                     | 0                                  | 2 (<1%)          |
| ARFORMOTEROL TARTRATE        | 0                           | 0                 | 0                           | 1 (<1%)                            | 1 (<1%)          |
| AZITHROMYCIN                 | 0                           | 0                 | 1 (<1%)                     | 0                                  | 1 (<1%)          |
| BENZONATATE                  | 0                           | 1 (1%)            | 0                           | 0                                  | 1 (<1%)          |
| EZETIMIBE                    | 0                           | 0                 | 1 (<1%)                     | 0                                  | 1 (<1%)          |
| FORMOTEROL                   | 0                           | 0                 | 0                           | 1 (<1%)                            | 1 (<1%)          |
| LEVALBUTEROL TARTRATE        | 0                           | 0                 | 0                           | 1 (<1%)                            | 1 (<1%)          |
| MOMETASONE FUROATE           | 0                           | 0                 | 0                           | 1 (<1%)                            | 1 (<1%)          |
| MOXIFLOXACIN                 | 0                           | 0                 | 0                           | 1 (<1%)                            | 1 (<1%)          |

dln73797: /arenv/arprod/ccil8781\_gr33343/asq112989/final/drivers/cm\_t001a\_copdpreri.sas 27JUL2010 20:12

CONFIDENTIAL

ASQ112989



Protocol: ASQ112989  
 Population: Run-in

Page 2 of 2

Table 1.19  
 Summary of COPD Medications Taken Before the Run-in

| Ingredient         | Run-in Failure (N=52) | Placebo (N=75) | SAL 50mcg BID (N=152) | FSC 250/50mcg BID (N=139) | Total (N=418) |
|--------------------|-----------------------|----------------|-----------------------|---------------------------|---------------|
| PIRBUTEROL ACETATE | 0                     | 0              | 0                     | 1 (<1%)                   | 1 (<1%)       |
| SIMVASTATIN        | 0                     | 0              | 1 (<1%)               | 0                         | 1 (<1%)       |
| TIOTROPIUM         | 0                     | 1 (1%)         | 0                     | 0                         | 1 (<1%)       |
| VALSARTAN          | 0                     | 0              | 0                     | 1 (<1%)                   | 1 (<1%)       |

For peer review only

97

CONFIDENTIAL

ASQ112989

dln73797: /arenv/arprod/ccil8781\_gr33343/asq112989/final/drivers/cm\_t001a\_copdpreri.sas 27JUL2010 20:12

Protocol: ASQ112989  
Population: Run-in

Page 1 of 1

Table 1.20  
Summary of COPD Medications Taken During the Run-in

| Ingredient                    | Run-in Failure<br>(N=52) | Placebo<br>(N=75) | SAL 50mcg<br>BID<br>(N=152) | FSC<br>250/50mcg<br>BID<br>(N=139) | Total<br>(N=418) |
|-------------------------------|--------------------------|-------------------|-----------------------------|------------------------------------|------------------|
| Any medication                | 18 (35%)                 | 21 (28%)          | 36 (24%)                    | 37 (27%)                           | 112 (27%)        |
| SALBUTAMOL                    | 5 (10%)                  | 9 (12%)           | 15 (10%)                    | 11 (8%)                            | 40 (10%)         |
| IPRATROPIUM BROMIDE           | 3 (6%)                   | 8 (11%)           | 15 (10%)                    | 12 (9%)                            | 38 (9%)          |
| OXYGEN                        | 1 (2%)                   | 3 (4%)            | 9 (6%)                      | 3 (2%)                             | 16 (4%)          |
| SALBUTAMOL SULFATE            | 3 (6%)                   | 3 (4%)            | 3 (2%)                      | 5 (4%)                             | 14 (3%)          |
| GUAIFENESIN                   | 0                        | 1 (1%)            | 1 (<1%)                     | 6 (4%)                             | 8 (2%)           |
| EPINEPHRINE                   | 1 (2%)                   | 1 (1%)            | 0                           | 3 (2%)                             | 5 (1%)           |
| PROAIR (NOS)                  | 2 (4%)                   | 0                 | 1 (<1%)                     | 2 (1%)                             | 5 (1%)           |
| ACETYLSALICYLIC ACID          | 1 (2%)                   | 0                 | 1 (<1%)                     | 0                                  | 2 (<1%)          |
| IPRATROPIUM                   | 1 (2%)                   | 0                 | 0                           | 1 (<1%)                            | 2 (<1%)          |
| PREDNISON                     | 2 (4%)                   | 0                 | 0                           | 0                                  | 2 (<1%)          |
| AZITHROMYCIN                  | 1 (2%)                   | 0                 | 0                           | 0                                  | 1 (<1%)          |
| BENZONATATE                   | 0                        | 1 (1%)            | 0                           | 0                                  | 1 (<1%)          |
| BUDESONIDE                    | 1 (2%)                   | 0                 | 0                           | 0                                  | 1 (<1%)          |
| CIPROFLOXACIN HYDROCHLORIDE   | 1 (2%)                   | 0                 | 0                           | 0                                  | 1 (<1%)          |
| CLARITHROMYCIN                | 1 (2%)                   | 0                 | 0                           | 0                                  | 1 (<1%)          |
| CORTISONE ACETATE             | 1 (2%)                   | 0                 | 0                           | 0                                  | 1 (<1%)          |
| EZETIMIBE                     | 0                        | 0                 | 1 (<1%)                     | 0                                  | 1 (<1%)          |
| FORMOTEROL FUMARATE           | 1 (2%)                   | 0                 | 0                           | 0                                  | 1 (<1%)          |
| LEVOSALBUTAMOL HYDROCHLORIDE  | 0                        | 0                 | 1 (<1%)                     | 0                                  | 1 (<1%)          |
| PSEUDOEPHEDRINE HYDROCHLORIDE | 0                        | 0                 | 0                           | 1 (<1%)                            | 1 (<1%)          |
| SALMETEROL XINAFOATE          | 1 (2%)                   | 0                 | 0                           | 0                                  | 1 (<1%)          |
| SIMVASTATIN                   | 0                        | 0                 | 1 (<1%)                     | 0                                  | 1 (<1%)          |
| VALSARTAN                     | 0                        | 0                 | 0                           | 1 (<1%)                            | 1 (<1%)          |

98

dln73797: /arenv/arprod/ccil8781\_gr33343/asq112989/final/drivers/cm\_t001b\_copddurri.sas 27JUL2010 20:10

Protocol: ASQ112989  
 Population: Modified Intent-to-treat

Page 1 of 2

Table 1.21  
 Summary of COPD Medications Taken During Treatment

| Ingredient                             | Placebo<br>(N=75) | SAL 50mcg<br>BID<br>(N=151) | FSC<br>250/50mcg<br>BID<br>(N=139) |
|----------------------------------------|-------------------|-----------------------------|------------------------------------|
| Any medication                         | 18 (24%)          | 40 (26%)                    | 32 (23%)                           |
| IPRATROPIUM BROMIDE                    | 8 (11%)           | 17 (11%)                    | 10 (7%)                            |
| SALBUTAMOL                             | 5 (7%)            | 17 (11%)                    | 7 (5%)                             |
| OXYGEN                                 | 3 (4%)            | 9 (6%)                      | 3 (2%)                             |
| PREDNISONE                             | 3 (4%)            | 7 (5%)                      | 1 (<1%)                            |
| SALBUTAMOL SULFATE                     | 3 (4%)            | 5 (3%)                      | 3 (2%)                             |
| GUAIFENESIN                            | 1 (1%)            | 2 (1%)                      | 7 (5%)                             |
| DOXYCYCLINE                            | 0                 | 3 (2%)                      | 1 (<1%)                            |
| LEVOFLOXACIN                           | 0                 | 4 (3%)                      | 0                                  |
| TIOTROPIUM BROMIDE                     | 0                 | 1 (<1%)                     | 3 (2%)                             |
| FLUTICASONE PROPIONATE                 | 0                 | 1 (<1%)                     | 2 (1%)                             |
| METHYLPREDNISOLONE                     | 1 (1%)            | 1 (<1%)                     | 1 (<1%)                            |
| METHYLPREDNISOLONE SODIUM<br>SUCCINATE | 0                 | 3 (2%)                      | 0                                  |
| SALMETEROL XINAFOATE                   | 0                 | 1 (<1%)                     | 2 (1%)                             |
| ACETYLSALICYLIC ACID                   | 0                 | 2 (1%)                      | 0                                  |
| AMOXICILLIN TRIHYDRATE                 | 0                 | 0                           | 2 (1%)                             |
| BENZONATATE                            | 1 (1%)            | 1 (<1%)                     | 0                                  |
| CLAVULANATE POTASSIUM                  | 0                 | 0                           | 2 (1%)                             |
| DEXAMETHASONE                          | 1 (1%)            | 1 (<1%)                     | 0                                  |
| PROAIR (NOS)                           | 0                 | 0                           | 2 (1%)                             |
| AMOXICILLIN                            | 0                 | 1 (<1%)                     | 0                                  |
| AZITHROMYCIN                           | 1 (1%)            | 0                           | 0                                  |
| CEFDINIR                               | 0                 | 0                           | 1 (<1%)                            |
| CIPROFLOXACIN                          | 0                 | 1 (<1%)                     | 0                                  |
| DIHYDROCODEINE BITARTRATE              | 0                 | 0                           | 1 (<1%)                            |
| ENOXAPARIN SODIUM                      | 0                 | 1 (<1%)                     | 0                                  |
| EZETIMIBE                              | 0                 | 1 (<1%)                     | 0                                  |
| FLUTICASONE                            | 0                 | 1 (<1%)                     | 0                                  |
| FORMOTEROL FUMARATE                    | 0                 | 1 (<1%)                     | 0                                  |

dln73797: /arenv/arprod/ccil8781\_gr33343/asq112989/final/drivers/cm\_t002\_copddur.sas 27JUL2010 20:10

99

1  
2  
3  
4  
5  
6  
7  
8  
9  
10  
11  
12  
13  
14  
15  
16  
17  
18  
19  
20  
21  
22  
23  
24  
25  
26  
27  
28  
29  
30  
31  
32  
33  
34  
35  
36  
37  
38  
39  
40  
41  
42  
43  
44  
45  
46  
47  
48  
49

Protocol: ASQ112989  
 Population: Modified Intent-to-treat

Page 2 of 2

Table 1.21  
 Summary of COPD Medications Taken During Treatment

| Ingredient                    | Placebo<br>(N=75) | SAL 50mcg<br>BID<br>(N=151) | FSC<br>250/50mcg<br>BID<br>(N=139) |
|-------------------------------|-------------------|-----------------------------|------------------------------------|
| HYDROCODONE                   | 0                 | 1 (<1%)                     | 0                                  |
| HYDROCODONE BITARTRATE        | 0                 | 1 (<1%)                     | 0                                  |
| IBUPROFEN                     | 0                 | 1 (<1%)                     | 0                                  |
| IPRATROPIUM                   | 0                 | 0                           | 1 (<1%)                            |
| KETOROLAC TROMETAMOL          | 0                 | 1 (<1%)                     | 0                                  |
| LEVOSALBUTAMOL HYDROCHLORIDE  | 0                 | 1 (<1%)                     | 0                                  |
| MOXIFLOXACIN                  | 0                 | 1 (<1%)                     | 0                                  |
| NICOTINE                      | 0                 | 1 (<1%)                     | 0                                  |
| PARACETAMOL                   | 0                 | 1 (<1%)                     | 0                                  |
| PHENYLTOLOXAMINE              | 0                 | 1 (<1%)                     | 0                                  |
| PIPERACILLIN SODIUM           | 0                 | 1 (<1%)                     | 0                                  |
| PSEUDOEPHEDRINE HYDROCHLORIDE | 0                 | 0                           | 1 (<1%)                            |
| ROBITUSSIN (NOS)              | 0                 | 1 (<1%)                     | 0                                  |
| SALMETEROL                    | 0                 | 1 (<1%)                     | 0                                  |
| SIMVASTATIN                   | 0                 | 1 (<1%)                     | 0                                  |
| TAZOBACTAM SODIUM             | 0                 | 1 (<1%)                     | 0                                  |
| TRIAMCINOLONE                 | 0                 | 1 (<1%)                     | 0                                  |
| VALSARTAN                     | 0                 | 0                           | 1 (<1%)                            |

100

dln73797: /arenv/arprod/ccil8781\_gr33343/asq112989/final/drivers/cm\_t002\_copddur.sas 27JUL2010 20:10

CONFIDENTIAL

ASQ112989

Protocol: ASQ112989  
 Population: Modified Intent-to-treat

Page 1 of 2

Table 1.22  
 Summary of COPD Medications Taken Post-Treatment

| Ingredient                   | Placebo<br>(N=75) | SAL 50mcg<br>BID<br>(N=151) | FSC<br>250/50mcg<br>BID<br>(N=139) |
|------------------------------|-------------------|-----------------------------|------------------------------------|
| Any medication               | 38 (51%)          | 79 (52%)                    | 70 (50%)                           |
| SALBUTAMOL                   | 22 (29%)          | 50 (33%)                    | 37 (27%)                           |
| IPRATROPIUM BROMIDE          | 9 (12%)           | 16 (11%)                    | 11 (8%)                            |
| TIOTROPIUM BROMIDE           | 8 (11%)           | 8 (5%)                      | 17 (12%)                           |
| SALBUTAMOL SULFATE           | 6 (8%)            | 9 (6%)                      | 10 (7%)                            |
| SALMETEROL XINAFOATE         | 4 (5%)            | 12 (8%)                     | 7 (5%)                             |
| FLUTICASONE PROPIONATE       | 3 (4%)            | 12 (8%)                     | 7 (5%)                             |
| OXYGEN                       | 3 (4%)            | 9 (6%)                      | 3 (2%)                             |
| FORMOTEROL FUMARATE          | 1 (1%)            | 8 (5%)                      | 5 (4%)                             |
| PROAIR (NOS)                 | 3 (4%)            | 7 (5%)                      | 2 (1%)                             |
| PREDNISONE                   | 2 (3%)            | 6 (4%)                      | 1 (<1%)                            |
| GUAIFENESIN                  | 1 (1%)            | 1 (<1%)                     | 6 (4%)                             |
| BUDESONIDE                   | 1 (1%)            | 4 (3%)                      | 1 (<1%)                            |
| ACETYLSALICYLIC ACID         | 0                 | 2 (1%)                      | 0                                  |
| AMOXICILLIN TRIHYDRATE       | 0                 | 0                           | 2 (1%)                             |
| BENZONATATE                  | 1 (1%)            | 1 (<1%)                     | 0                                  |
| CLAVULANATE POTASSIUM        | 0                 | 0                           | 2 (1%)                             |
| DOXYCYCLINE                  | 0                 | 2 (1%)                      | 0                                  |
| LEVOFLOXACIN                 | 0                 | 2 (1%)                      | 0                                  |
| AMOXICILLIN                  | 1 (1%)            | 0                           | 0                                  |
| BECLOMETASONE DIPROPIONATE   | 0                 | 0                           | 1 (<1%)                            |
| CEFDINIR                     | 0                 | 0                           | 1 (<1%)                            |
| CIPROFLOXACIN                | 0                 | 1 (<1%)                     | 0                                  |
| EZETIMIBE                    | 0                 | 1 (<1%)                     | 0                                  |
| FLUTICASONE                  | 0                 | 1 (<1%)                     | 0                                  |
| FORMOTEROL                   | 0                 | 0                           | 1 (<1%)                            |
| IBUPROFEN                    | 0                 | 1 (<1%)                     | 0                                  |
| IPRATROPIUM                  | 0                 | 0                           | 1 (<1%)                            |
| KETOROLAC TROMETAMOL         | 0                 | 1 (<1%)                     | 0                                  |
| LEVOSALBUTAMOL HYDROCHLORIDE | 0                 | 0                           | 1 (<1%)                            |

dln73797: /arenv/arprod/ccil18781\_gr33343/asq112989/final/drivers/cm\_t003\_copdpst.sas 27JUL2010 20:12

101

CONFIDENTIAL

ASQ112989

Protocol: ASQ112989  
Population: Modified Intent-to-treat

Table 1.22  
Summary of COPD Medications Taken Post-Treatment

| Ingredient         | Placebo<br>(N=75) | SAL 50mcg<br>BID<br>(N=151) | FSC<br>250/50mcg<br>BID<br>(N=139) |
|--------------------|-------------------|-----------------------------|------------------------------------|
| NICOTINE           | 0                 | 1 (<1%)                     | 0                                  |
| PARACETAMOL        | 0                 | 1 (<1%)                     | 0                                  |
| PIRBUTEROL ACETATE | 0                 | 0                           | 1 (<1%)                            |
| ROBITUSSIN (NOS)   | 0                 | 1 (<1%)                     | 0                                  |
| SALMETEROL         | 0                 | 1 (<1%)                     | 0                                  |
| SIMVASTATIN        | 0                 | 1 (<1%)                     | 0                                  |
| TETRACYCLINE       | 0                 | 0                           | 1 (<1%)                            |
| TIOTROPIUM         | 0                 | 1 (<1%)                     | 0                                  |
| VALSARTAN          | 0                 | 0                           | 1 (<1%)                            |

1  
2  
3  
4  
5  
6  
7  
8  
9  
10  
11  
12  
13  
14  
15  
16  
17  
18  
19  
20  
21  
22  
23  
24  
25  
26  
27  
28  
29  
30  
31  
32  
33  
34  
35  
36  
37  
38  
39  
40  
41  
42  
43  
44  
45  
46  
47  
48  
49

102

For peer review only

dln73797: /arenv/arprod/ccil8781\_gr33343/asq112989/final/drivers/cm\_t003\_copdpst.sas 27JUL2010 20:12

CONFIDENTIAL

ASQ112989

Protocol: ASQ112989  
Population: Run-in

Page 1 of 23

Table 1.23  
Summary of Non-COPD Medications Taken During the Run-in

| ATC Level 1<br>Ingredient | Run-in<br>Failure<br>(N=52) | Placebo<br>(N=75) | SAL 50mcg<br>BID<br>(N=152) | FSC<br>250/50mcg<br>BID<br>(N=139) | Total<br>(N=418) |
|---------------------------|-----------------------------|-------------------|-----------------------------|------------------------------------|------------------|
| Any medication            | 44 (85%)                    | 62 (83%)          | 135 (89%)                   | 126 (91%)                          | 367 (88%)        |
| NERVOUS SYSTEM            |                             |                   |                             |                                    |                  |
| Any medication            | 36 (69%)                    | 47 (63%)          | 102 (67%)                   | 97 (70%)                           | 282 (67%)        |
| ACETYLSALICYLIC ACID      | 13 (25%)                    | 20 (27%)          | 46 (30%)                    | 49 (35%)                           | 128 (31%)        |
| PARACETAMOL               | 12 (23%)                    | 12 (16%)          | 40 (26%)                    | 32 (23%)                           | 96 (23%)         |
| IBUPROFEN                 | 5 (10%)                     | 9 (12%)           | 19 (13%)                    | 12 (9%)                            | 45 (11%)         |
| ALPRAZOLAM                | 6 (12%)                     | 4 (5%)            | 8 (5%)                      | 9 (6%)                             | 27 (6%)          |
| GABAPENTIN                | 3 (6%)                      | 2 (3%)            | 6 (4%)                      | 7 (5%)                             | 18 (4%)          |
| HYDROCODONE               | 2 (4%)                      | 2 (3%)            | 6 (4%)                      | 3 (2%)                             | 13 (3%)          |
| TRAZODONE                 | 0                           | 2 (3%)            | 3 (2%)                      | 6 (4%)                             | 11 (3%)          |
| SERTRALINE HYDROCHLORIDE  | 3 (6%)                      | 0                 | 3 (2%)                      | 4 (3%)                             | 10 (2%)          |
| CLONAZEPAM                | 0                           | 1 (1%)            | 2 (1%)                      | 6 (4%)                             | 9 (2%)           |
| CLONIDINE                 | 0                           | 0                 | 4 (3%)                      | 5 (4%)                             | 9 (2%)           |
| DULOXETINE                | 1 (2%)                      | 3 (4%)            | 3 (2%)                      | 1 (<1%)                            | 8 (2%)           |
| FLUOXETINE HYDROCHLORIDE  | 1 (2%)                      | 2 (3%)            | 2 (1%)                      | 3 (2%)                             | 8 (2%)           |
| LORAZEPAM                 | 3 (6%)                      | 0                 | 2 (1%)                      | 3 (2%)                             | 8 (2%)           |
| ESCITALOPRAM OXALATE      | 1 (2%)                      | 1 (1%)            | 2 (1%)                      | 3 (2%)                             | 7 (2%)           |
| PAROXETINE HYDROCHLORIDE  | 1 (2%)                      | 1 (1%)            | 2 (1%)                      | 3 (2%)                             | 7 (2%)           |
| ZOLPIDEM TARTRATE         | 2 (4%)                      | 1 (1%)            | 1 (<1%)                     | 3 (2%)                             | 7 (2%)           |
| VENLAFAXINE HYDROCHLORIDE | 2 (4%)                      | 0                 | 3 (2%)                      | 1 (<1%)                            | 6 (1%)           |
| AMITRIPTYLINE             | 2 (4%)                      | 0                 | 2 (1%)                      | 1 (<1%)                            | 5 (1%)           |
| BUPROPION HYDROCHLORIDE   | 0                           | 1 (1%)            | 1 (<1%)                     | 3 (2%)                             | 5 (1%)           |
| CAFFEINE                  | 1 (2%)                      | 0                 | 3 (2%)                      | 1 (<1%)                            | 5 (1%)           |
| CITALOPRAM HYDROBROMIDE   | 0                           | 1 (1%)            | 2 (1%)                      | 2 (1%)                             | 5 (1%)           |

Note: A medication may be included in more than one ATC Level category and appear more than once.

Note: The following ingredient terms, which do not have an associated ATC Level 1 term, were also taken during Run-in with the following frequencies: Bovine Prostate: SAL 50mcg-1 subject, <1%, Capsicum Annuum: SAL 50mcg-1 subject, <1%, Dextroamphetamine Saccharate: Placebo-1 subject, 1%, Lactoperoxidase: Placebo-1 subject, 1%, and Zinc Arginate: SAL 50mcg-1 subject, <1%.

dln73797: /arenv/arprod/ccil8781\_gr33343/asq112989/final/drivers/cm\_t004\_noncopddurri.sas 24AUG2010 15:26

103

CONFIDENTIAL

ASQ112989

Protocol: ASQ112989  
Population: Run-in

Page 2 of 23

Table 1.23  
Summary of Non-COPD Medications Taken During the Run-in

| ATC Level 1<br>Ingredient   | Run-in<br>Failure<br>(N=52) | Placebo<br>(N=75) | SAL 50mcg<br>BID<br>(N=152) | FSC<br>250/50mcg<br>BID<br>(N=139) | Total<br>(N=418) |
|-----------------------------|-----------------------------|-------------------|-----------------------------|------------------------------------|------------------|
| CYCLOBENZAPRINE             | 1 (2%)                      | 1 (1%)            | 0                           | 3 (2%)                             | 5 (1%)           |
| HYDROCHLORIDE               |                             |                   |                             |                                    |                  |
| DIAZEPAM                    | 0                           | 0                 | 4 (3%)                      | 1 (<1%)                            | 5 (1%)           |
| OXYCODONE HYDROCHLORIDE     | 0                           | 0                 | 2 (1%)                      | 3 (2%)                             | 5 (1%)           |
| TEMAZEPAM                   | 0                           | 1 (1%)            | 3 (2%)                      | 1 (<1%)                            | 5 (1%)           |
| ARIPIPIRAZOLE               | 1 (2%)                      | 1 (1%)            | 1 (<1%)                     | 1 (<1%)                            | 4 (<1%)          |
| BUPROPION                   | 0                           | 2 (3%)            | 1 (<1%)                     | 1 (<1%)                            | 4 (<1%)          |
| CITALOPRAM                  | 1 (2%)                      | 1 (1%)            | 1 (<1%)                     | 1 (<1%)                            | 4 (<1%)          |
| ROPINIROLE HYDROCHLORIDE    | 0                           | 0                 | 1 (<1%)                     | 3 (2%)                             | 4 (<1%)          |
| TRAMADOL HYDROCHLORIDE      | 0                           | 1 (1%)            | 1 (<1%)                     | 2 (1%)                             | 4 (<1%)          |
| AMITRIPTYLINE HYDROCHLORIDE | 0                           | 0                 | 1 (<1%)                     | 2 (1%)                             | 3 (<1%)          |
| DOXYLAMINE SUCCINATE        | 1 (2%)                      | 1 (1%)            | 0                           | 1 (<1%)                            | 3 (<1%)          |
| ESZOPICLONE                 | 1 (2%)                      | 1 (1%)            | 1 (<1%)                     | 0                                  | 3 (<1%)          |
| HYDROXYZINE                 | 1 (2%)                      | 0                 | 2 (1%)                      | 0                                  | 3 (<1%)          |
| LAMOTRIGINE                 | 1 (2%)                      | 0                 | 0                           | 2 (1%)                             | 3 (<1%)          |
| OLANZAPINE                  | 0                           | 1 (1%)            | 1 (<1%)                     | 1 (<1%)                            | 3 (<1%)          |
| OXYCODONE                   | 0                           | 0                 | 1 (<1%)                     | 2 (1%)                             | 3 (<1%)          |
| PAROXETINE                  | 0                           | 0                 | 3 (2%)                      | 0                                  | 3 (<1%)          |
| PHENYTOIN                   | 2 (4%)                      | 0                 | 1 (<1%)                     | 0                                  | 3 (<1%)          |
| PREGABALIN                  | 0                           | 1 (1%)            | 0                           | 2 (1%)                             | 3 (<1%)          |
| ROPINIROLE                  | 2 (4%)                      | 0                 | 0                           | 1 (<1%)                            | 3 (<1%)          |
| SERTRALINE                  | 0                           | 0                 | 0                           | 3 (2%)                             | 3 (<1%)          |
| TRAMADOL                    | 1 (2%)                      | 1 (1%)            | 0                           | 1 (<1%)                            | 3 (<1%)          |
| VARENICLINE TARTRATE        | 0                           | 2 (3%)            | 0                           | 1 (<1%)                            | 3 (<1%)          |
| CAPSAICIN                   | 0                           | 0                 | 0                           | 2 (1%)                             | 2 (<1%)          |
| CLONIDINE HYDROCHLORIDE     | 0                           | 0                 | 1 (<1%)                     | 1 (<1%)                            | 2 (<1%)          |

Note: A medication may be included in more than one ATC Level category and appear more than once.

Note: The following ingredient terms, which do not have an associated ATC Level 1 term, were also taken during Run-in with the following frequencies: Bovine Prostate: SAL 50mcg-1 subject, <1%, Capsicum Annuum: SAL 50mcg-1 subject, <1%, Dextroamphetamine Saccharate: Placebo-1 subject, 1%, Lactoperoxidase: Placebo-1 subject, 1%, and Zinc Arginate: SAL 50mcg-1 subject, <1%.

dln73797: /arenv/arprod/ccil18781\_gr33343/asq112989/final/drivers/cm\_t004\_noncopddurri.sas 24AUG2010 15:26

104

CONFIDENTIAL

ASQ112989



Protocol: ASQ112989  
Population: Run-in

Page 3 of 23

Table 1.23  
Summary of Non-COPD Medications Taken During the Run-in

| ATC Level 1<br>Ingredient    | Run-in<br>Failure<br>(N=52) | Placebo<br>(N=75) | SAL 50mcg<br>BID<br>(N=152) | FSC<br>250/50mcg<br>BID<br>(N=139) | Total<br>(N=418) |
|------------------------------|-----------------------------|-------------------|-----------------------------|------------------------------------|------------------|
| CYCLOBENZAPRINE              | 0                           | 0                 | 1 (<1%)                     | 1 (<1%)                            | 2 (<1%)          |
| DEXTROPROPOXYPHENE NAPSILATE | 0                           | 0                 | 0                           | 2 (1%)                             | 2 (<1%)          |
| HYDROXYZINE HYDROCHLORIDE    | 0                           | 1 (1%)            | 1 (<1%)                     | 0                                  | 2 (<1%)          |
| LIDOCAINE                    | 0                           | 0                 | 2 (1%)                      | 0                                  | 2 (<1%)          |
| NORTRIPTYLINE                | 0                           | 1 (1%)            | 0                           | 1 (<1%)                            | 2 (<1%)          |
| QUETIAPINE FUMARATE          | 0                           | 1 (1%)            | 0                           | 1 (<1%)                            | 2 (<1%)          |
| TOMEXETINE HYDROCHLORIDE     | 1 (2%)                      | 0                 | 0                           | 1 (<1%)                            | 2 (<1%)          |
| VALPROIC ACID                | 1 (2%)                      | 0                 | 0                           | 1 (<1%)                            | 2 (<1%)          |
| VENLAFAXINE                  | 1 (2%)                      | 1 (1%)            | 0                           | 0                                  | 2 (<1%)          |
| AMFETAMINE ASPARTATE         | 0                           | 1 (1%)            | 0                           | 0                                  | 1 (<1%)          |
| AMFETAMINE SULFATE           | 0                           | 1 (1%)            | 0                           | 0                                  | 1 (<1%)          |
| BECLAMIDE                    | 0                           | 0                 | 0                           | 1 (<1%)                            | 1 (<1%)          |
| BENZODIAZEPINE, NOS          | 0                           | 0                 | 1 (<1%)                     | 0                                  | 1 (<1%)          |
| BETHANECHOL CHLORIDE         | 0                           | 0                 | 1 (<1%)                     | 0                                  | 1 (<1%)          |
| BUPRENORPHINE HYDROCHLORIDE  | 0                           | 0                 | 0                           | 1 (<1%)                            | 1 (<1%)          |
| BUSPIRONE                    | 0                           | 0                 | 1 (<1%)                     | 0                                  | 1 (<1%)          |
| BUSPIRONE HYDROCHLORIDE      | 0                           | 0                 | 1 (<1%)                     | 0                                  | 1 (<1%)          |
| CARBAMAZEPINE                | 0                           | 0                 | 0                           | 1 (<1%)                            | 1 (<1%)          |
| COCAINE                      | 0                           | 0                 | 0                           | 1 (<1%)                            | 1 (<1%)          |
| CODEINE                      | 0                           | 0                 | 0                           | 1 (<1%)                            | 1 (<1%)          |
| CRACK COCAINE                | 0                           | 0                 | 0                           | 1 (<1%)                            | 1 (<1%)          |
| DEXAMFETAMINE SULFATE        | 0                           | 1 (1%)            | 0                           | 0                                  | 1 (<1%)          |
| DIPOTASSIUM CLORAZEPATE      | 0                           | 0                 | 0                           | 1 (<1%)                            | 1 (<1%)          |
| EXCEDRIN (NOS)               | 0                           | 0                 | 1 (<1%)                     | 0                                  | 1 (<1%)          |
| FENTANYL                     | 0                           | 1 (1%)            | 0                           | 0                                  | 1 (<1%)          |
| FLUOXETINE                   | 0                           | 1 (1%)            | 0                           | 0                                  | 1 (<1%)          |

Note: A medication may be included in more than one ATC Level category and appear more than once.

Note: The following ingredient terms, which do not have an associated ATC Level 1 term, were also taken during Run-in with the following frequencies: Bovine Prostate: SAL 50mcg-1 subject, <1%, Capsicum Annuum: SAL 50mcg-1 subject, <1%, Dextroamphetamine Saccharate: Placebo-1 subject, 1%, Lactoperoxidase: Placebo-1 subject, 1%, and Zinc Arginate: SAL 50mcg-1 subject, <1%.

dln73797: /arenv/arprod/ccil18781\_gr33343/asq112989/final/drivers/cm\_t004\_noncopddurri.sas 24AUG2010 15:26

105

CONFIDENTIAL

ASQ112989

Protocol: ASQ112989  
Population: Run-in

Page 4 of 23

Table 1.23  
Summary of Non-COPD Medications Taken During the Run-in

| ATC Level 1<br>Ingredient        | Run-in<br>Failure<br>(N=52) | Placebo<br>(N=75) | SAL 50mcg<br>BID<br>(N=152) | FSC<br>250/50mcg<br>BID<br>(N=139) | Total<br>(N=418) |
|----------------------------------|-----------------------------|-------------------|-----------------------------|------------------------------------|------------------|
| HYDROMORPHONE HYDROCHLORIDE      | 1 (2%)                      | 0                 | 0                           | 0                                  | 1 (<1%)          |
| KETOROLAC TROMETAMOL             | 0                           | 1 (1%)            | 0                           | 0                                  | 1 (<1%)          |
| LEVETIRACETAM                    | 1 (2%)                      | 0                 | 0                           | 0                                  | 1 (<1%)          |
| METHYLPHENIDATE<br>HYDROCHLORIDE | 0                           | 0                 | 0                           | 1 (<1%)                            | 1 (<1%)          |
| MIDAZOLAM                        | 0                           | 1 (1%)            | 0                           | 0                                  | 1 (<1%)          |
| MIRTAZAPINE                      | 0                           | 0                 | 0                           | 1 (<1%)                            | 1 (<1%)          |
| MORPHINE                         | 0                           | 0                 | 0                           | 1 (<1%)                            | 1 (<1%)          |
| NICOTINE                         | 0                           | 0                 | 0                           | 1 (<1%)                            | 1 (<1%)          |
| PHENOBARBITAL                    | 0                           | 0                 | 1 (<1%)                     | 0                                  | 1 (<1%)          |
| PRAMIPEXOLE DIHYDROCHLORIDE      | 0                           | 0                 | 0                           | 1 (<1%)                            | 1 (<1%)          |
| PROMETHAZINE                     | 0                           | 1 (1%)            | 0                           | 0                                  | 1 (<1%)          |
| SALICYLAMIDE                     | 1 (2%)                      | 0                 | 0                           | 0                                  | 1 (<1%)          |
| SULTOPRIDE                       | 0                           | 1 (1%)            | 0                           | 0                                  | 1 (<1%)          |
| TRAZODONE HYDROCHLORIDE          | 0                           | 0                 | 1 (<1%)                     | 0                                  | 1 (<1%)          |
| ZOLPIDEM                         | 1 (2%)                      | 0                 | 0                           | 0                                  | 1 (<1%)          |
| ALIMENTARY TRACT AND METABOLISM  |                             |                   |                             |                                    |                  |
| Any medication                   | 34 (65%)                    | 40 (53%)          | 90 (59%)                    | 93 (67%)                           | 257 (61%)        |
| ACETYLSALICYLIC ACID             | 13 (25%)                    | 20 (27%)          | 46 (30%)                    | 49 (35%)                           | 128 (31%)        |
| VITAMINS NOS                     | 9 (17%)                     | 11 (15%)          | 16 (11%)                    | 22 (16%)                           | 58 (14%)         |
| OMEPRAZOLE                       | 4 (8%)                      | 5 (7%)            | 19 (13%)                    | 16 (12%)                           | 44 (11%)         |
| CALCIUM                          | 3 (6%)                      | 5 (7%)            | 7 (5%)                      | 13 (9%)                            | 28 (7%)          |
| METFORMIN                        | 3 (6%)                      | 0                 | 6 (4%)                      | 10 (7%)                            | 19 (5%)          |
| ASCORBIC ACID                    | 4 (8%)                      | 3 (4%)            | 9 (6%)                      | 2 (1%)                             | 18 (4%)          |

Note: A medication may be included in more than one ATC Level category and appear more than once.

Note: The following ingredient terms, which do not have an associated ATC Level 1 term, were also taken during Run-in with the following frequencies: Bovine Prostate: SAL 50mcg-1 subject, <1%, Capsicum Annuum: SAL 50mcg-1 subject, <1%, Dextroamphetamine Saccharate: Placebo-1 subject, 1%, Lactoperoxidase: Placebo-1 subject, 1%, and Zinc Arginate: SAL 50mcg-1 subject, <1%.

dln73797: /arenv/arprod/ccil8781\_gr33343/asq112989/final/drivers/cm\_t004\_noncopddurri.sas 24AUG2010 15:26

106

CONFIDENTIAL

ASQ112989

Protocol: ASQ112989  
Population: Run-in

Page 5 of 23

Table 1.23  
Summary of Non-COPD Medications Taken During the Run-in

| ATC Level 1<br>Ingredient  | Run-in<br>Failure<br>(N=52) | Placebo<br>(N=75) | SAL 50mcg<br>BID<br>(N=152) | FSC<br>250/50mcg<br>BID<br>(N=139) | Total<br>(N=418) |
|----------------------------|-----------------------------|-------------------|-----------------------------|------------------------------------|------------------|
| ERGOCALCIFEROL             | 2 (4%)                      | 2 (3%)            | 4 (3%)                      | 6 (4%)                             | 14 (3%)          |
| ESOMEPRAZOLE MAGNESIUM     | 2 (4%)                      | 1 (1%)            | 5 (3%)                      | 6 (4%)                             | 14 (3%)          |
| MINERALS NOS               | 2 (4%)                      | 4 (5%)            | 3 (2%)                      | 4 (3%)                             | 13 (3%)          |
| POTASSIUM CHLORIDE         | 0                           | 3 (4%)            | 4 (3%)                      | 6 (4%)                             | 13 (3%)          |
| VITAMIN D NOS              | 2 (4%)                      | 3 (4%)            | 4 (3%)                      | 4 (3%)                             | 13 (3%)          |
| METFORMIN HYDROCHLORIDE    | 1 (2%)                      | 2 (3%)            | 2 (1%)                      | 7 (5%)                             | 12 (3%)          |
| PANTOPRAZOLE               | 1 (2%)                      | 1 (1%)            | 2 (1%)                      | 7 (5%)                             | 11 (3%)          |
| RANITIDINE                 | 2 (4%)                      | 3 (4%)            | 5 (3%)                      | 1 (<1%)                            | 11 (3%)          |
| TOCOPHEROL                 | 3 (6%)                      | 2 (3%)            | 4 (3%)                      | 2 (1%)                             | 11 (3%)          |
| FAMOTIDINE                 | 0                           | 2 (3%)            | 1 (<1%)                     | 5 (4%)                             | 8 (2%)           |
| GLIPIZIDE                  | 0                           | 1 (1%)            | 4 (3%)                      | 3 (2%)                             | 8 (2%)           |
| RANITIDINE HYDROCHLORIDE   | 1 (2%)                      | 1 (1%)            | 4 (3%)                      | 2 (1%)                             | 8 (2%)           |
| CALCIUM CARBONATE          | 1 (2%)                      | 2 (3%)            | 1 (<1%)                     | 3 (2%)                             | 7 (2%)           |
| LANSOPRAZOLE               | 1 (2%)                      | 0                 | 4 (3%)                      | 2 (1%)                             | 7 (2%)           |
| GLIBENCLAMIDE              | 1 (2%)                      | 1 (1%)            | 3 (2%)                      | 1 (<1%)                            | 6 (1%)           |
| GLIMEPIRIDE                | 2 (4%)                      | 0                 | 1 (<1%)                     | 3 (2%)                             | 6 (1%)           |
| INSULIN GLARGINE           | 3 (6%)                      | 0                 | 1 (<1%)                     | 2 (1%)                             | 6 (1%)           |
| POTASSIUM NOS              | 1 (2%)                      | 0                 | 3 (2%)                      | 2 (1%)                             | 6 (1%)           |
| LOPERAMIDE HYDROCHLORIDE   | 1 (2%)                      | 1 (1%)            | 0                           | 2 (1%)                             | 4 (<1%)          |
| PLANTAGO OVATA             | 1 (2%)                      | 0                 | 1 (<1%)                     | 2 (1%)                             | 4 (<1%)          |
| SITAGLIPTIN                | 1 (2%)                      | 0                 | 1 (<1%)                     | 2 (1%)                             | 4 (<1%)          |
| DEXLANSOPRAZOLE            | 0                           | 0                 | 2 (1%)                      | 1 (<1%)                            | 3 (<1%)          |
| HYDROCORTISONE             | 1 (2%)                      | 0                 | 2 (1%)                      | 0                                  | 3 (<1%)          |
| INSULIN ASPART             | 1 (2%)                      | 1 (1%)            | 1 (<1%)                     | 0                                  | 3 (<1%)          |
| INSULIN DETEMIR            | 1 (2%)                      | 2 (3%)            | 0                           | 0                                  | 3 (<1%)          |
| PIOGLITAZONE HYDROCHLORIDE | 1 (2%)                      | 1 (1%)            | 0                           | 1 (<1%)                            | 3 (<1%)          |

Note: A medication may be included in more than one ATC Level category and appear more than once.

Note: The following ingredient terms, which do not have an associated ATC Level 1 term, were also taken during Run-in with the following frequencies: Bovine Prostate: SAL 50mcg-1 subject, <1%, Capsicum Annuum: SAL 50mcg-1 subject, <1%, Dextroamphetamine Saccharate: Placebo-1 subject, 1%, Lactoperoxidase: Placebo-1 subject, 1%, and Zinc Arginate: SAL 50mcg-1 subject, <1%.

dln73797: /arenv/arprod/ccil18781\_gr33343/asq112989/final/drivers/cm\_t004\_noncopddurri.sas 24AUG2010 15:26

107

CONFIDENTIAL

ASQ112989

Protocol: ASQ112989  
Population: Run-in

Page 6 of 23

Table 1.23  
Summary of Non-COPD Medications Taken During the Run-in

| ATC Level 1<br>Ingredient            | Run-in<br>Failure<br>(N=52) | Placebo<br>(N=75) | SAL 50mcg<br>BID<br>(N=152) | FSC<br>250/50mcg<br>BID<br>(N=139) | Total<br>(N=418) |
|--------------------------------------|-----------------------------|-------------------|-----------------------------|------------------------------------|------------------|
| PREDNISONE                           | 3 (6%)                      | 0                 | 0                           | 0                                  | 3 (<1%)          |
| PYRIDOXINE HYDROCHLORIDE             | 0                           | 0                 | 2 (1%)                      | 1 (<1%)                            | 3 (<1%)          |
| SENNA                                | 1 (2%)                      | 0                 | 0                           | 2 (1%)                             | 3 (<1%)          |
| THIAMINE HYDROCHLORIDE               | 0                           | 1 (1%)            | 1 (<1%)                     | 1 (<1%)                            | 3 (<1%)          |
| ZINC                                 | 0                           | 1 (1%)            | 1 (<1%)                     | 1 (<1%)                            | 3 (<1%)          |
| BETACAROTENE                         | 0                           | 0                 | 2 (1%)                      | 0                                  | 2 (<1%)          |
| CALCIUM CITRATE                      | 0                           | 1 (1%)            | 0                           | 1 (<1%)                            | 2 (<1%)          |
| CINNAMOMUM VERUM                     | 0                           | 0                 | 0                           | 2 (1%)                             | 2 (<1%)          |
| COLECALCIFEROL                       | 0                           | 0                 | 0                           | 2 (1%)                             | 2 (<1%)          |
| COPPER                               | 0                           | 0                 | 2 (1%)                      | 0                                  | 2 (<1%)          |
| DOCUSATE SODIUM                      | 1 (2%)                      | 1 (1%)            | 0                           | 0                                  | 2 (<1%)          |
| HYOSCYAMINE SULFATE                  | 0                           | 1 (1%)            | 1 (<1%)                     | 0                                  | 2 (<1%)          |
| INSULIN HUMAN                        | 1 (2%)                      | 1 (1%)            | 0                           | 0                                  | 2 (<1%)          |
| INSULIN HUMAN INJECTION,<br>ISOPHANE | 0                           | 1 (1%)            | 0                           | 1 (<1%)                            | 2 (<1%)          |
| LACTOBACILLUS ACIDOPHILUS            | 1 (2%)                      | 1 (1%)            | 0                           | 0                                  | 2 (<1%)          |
| MAGNESIUM OXIDE                      | 0                           | 0                 | 2 (1%)                      | 0                                  | 2 (<1%)          |
| METRONIDAZOLE                        | 1 (2%)                      | 0                 | 1 (<1%)                     | 0                                  | 2 (<1%)          |
| RABEPRAZOLE SODIUM                   | 0                           | 0                 | 1 (<1%)                     | 1 (<1%)                            | 2 (<1%)          |
| RETINOL                              | 1 (2%)                      | 0                 | 1 (<1%)                     | 0                                  | 2 (<1%)          |
| RIBOFLAVIN                           | 0                           | 0                 | 2 (1%)                      | 0                                  | 2 (<1%)          |
| SELENIUM                             | 0                           | 0                 | 1 (<1%)                     | 1 (<1%)                            | 2 (<1%)          |
| SODIUM BICARBONATE                   | 0                           | 0                 | 0                           | 2 (1%)                             | 2 (<1%)          |
| SODIUM CHLORIDE                      | 0                           | 1 (1%)            | 0                           | 1 (<1%)                            | 2 (<1%)          |
| VITAMIN B SUBSTANCES NOS             | 0                           | 0                 | 1 (<1%)                     | 1 (<1%)                            | 2 (<1%)          |
| ANBESOL (NOS)                        | 0                           | 0                 | 0                           | 1 (<1%)                            | 1 (<1%)          |

Note: A medication may be included in more than one ATC Level category and appear more than once.

Note: The following ingredient terms, which do not have an associated ATC Level 1 term, were also taken during Run-in with the following frequencies: Bovine Prostate: SAL 50mcg-1 subject, <1%, Capsicum Annuum: SAL 50mcg-1 subject, <1%, Dextroamphetamine Saccharate: Placebo-1 subject, 1%, Lactoperoxidase: Placebo-1 subject, 1%, and Zinc Arginate: SAL 50mcg-1 subject, <1%.

dln73797: /arenv/arprod/ccil18781\_gr33343/asq112989/final/drivers/cm\_t004\_noncopddurri.sas 24AUG2010 15:26

108

CONFIDENTIAL

ASQ112989

Protocol: ASQ112989  
Population: Run-in

Page 7 of 23

Table 1.23  
Summary of Non-COPD Medications Taken During the Run-in

| ATC Level 1<br>Ingredient               | Run-in<br>Failure<br>(N=52) | Placebo<br>(N=75) | SAL 50mcg<br>BID<br>(N=152) | FSC<br>250/50mcg<br>BID<br>(N=139) | Total<br>(N=418) |
|-----------------------------------------|-----------------------------|-------------------|-----------------------------|------------------------------------|------------------|
| ATROPINE SULFATE                        | 0                           | 0                 | 1 (<1%)                     | 0                                  | 1 (<1%)          |
| BIOTIN                                  | 0                           | 0                 | 0                           | 1 (<1%)                            | 1 (<1%)          |
| BISMUTH SUBSALICYLATE                   | 0                           | 0                 | 0                           | 1 (<1%)                            | 1 (<1%)          |
| BUDESONIDE                              | 1 (2%)                      | 0                 | 0                           | 0                                  | 1 (<1%)          |
| CHOLINE BITARTRATE                      | 0                           | 0                 | 0                           | 1 (<1%)                            | 1 (<1%)          |
| CITRIC ACID                             | 0                           | 0                 | 0                           | 1 (<1%)                            | 1 (<1%)          |
| DEXAMFETAMINE SULFATE                   | 0                           | 1 (1%)            | 0                           | 0                                  | 1 (<1%)          |
| DICYCLOVERINE HYDROCHLORIDE             | 0                           | 0                 | 0                           | 1 (<1%)                            | 1 (<1%)          |
| DIHYDROXYALUMINUM SODIUM<br>CARBONATE   | 0                           | 0                 | 1 (<1%)                     | 0                                  | 1 (<1%)          |
| DOCUSATE                                | 0                           | 0                 | 0                           | 1 (<1%)                            | 1 (<1%)          |
| DULCOLAX (NOS)                          | 0                           | 1 (1%)            | 0                           | 0                                  | 1 (<1%)          |
| ESOMEPRAZOLE                            | 0                           | 1 (1%)            | 0                           | 0                                  | 1 (<1%)          |
| HYOSCINE HYDROBROMIDE                   | 0                           | 0                 | 1 (<1%)                     | 0                                  | 1 (<1%)          |
| INSULIN ISOPHANE, HUMAN<br>BIOSYNTHETIC | 1 (2%)                      | 0                 | 0                           | 0                                  | 1 (<1%)          |
| INSULIN LISPRO                          | 0                           | 0                 | 1 (<1%)                     | 0                                  | 1 (<1%)          |
| ISOPHANE INSULIN                        | 0                           | 0                 | 0                           | 1 (<1%)                            | 1 (<1%)          |
| LAXATIVES, NOS                          | 0                           | 1 (1%)            | 0                           | 0                                  | 1 (<1%)          |
| LOPERAMIDE                              | 0                           | 0                 | 1 (<1%)                     | 0                                  | 1 (<1%)          |
| MACROGOL                                | 0                           | 0                 | 0                           | 1 (<1%)                            | 1 (<1%)          |
| MAGNESIUM                               | 0                           | 0                 | 0                           | 1 (<1%)                            | 1 (<1%)          |
| MAGNESIUM GLUCONATE                     | 0                           | 0                 | 0                           | 1 (<1%)                            | 1 (<1%)          |
| MAGNESIUM HYDROXIDE                     | 1 (2%)                      | 0                 | 0                           | 0                                  | 1 (<1%)          |
| MECLOZINE                               | 0                           | 0                 | 1 (<1%)                     | 0                                  | 1 (<1%)          |
| METOCLOPRAMIDE HYDROCHLORIDE            | 0                           | 1 (1%)            | 0                           | 0                                  | 1 (<1%)          |

Note: A medication may be included in more than one ATC Level category and appear more than once.

Note: The following ingredient terms, which do not have an associated ATC Level 1 term, were also taken during Run-in with the following frequencies: Bovine Prostate: SAL 50mcg-1 subject, <1%, Capsicum Annuum: SAL 50mcg-1 subject, <1%, Dextroamphetamine Saccharate: Placebo-1 subject, 1%, Lactoperoxidase: Placebo-1 subject, 1%, and Zinc Arginate: SAL 50mcg-1 subject, <1%.

dln73797: /arenv/arprod/ccil18781\_gr33343/asq112989/final/drivers/cm\_t004\_noncopddurri.sas 24AUG2010 15:26

109

CONFIDENTIAL

ASQ112989

Protocol: ASQ112989  
Population: Run-in

Page 8 of 23

Table 1.23  
Summary of Non-COPD Medications Taken During the Run-in

| ATC Level 1<br>Ingredient | Run-in<br>Failure<br>(N=52) | Placebo<br>(N=75) | SAL 50mcg<br>BID<br>(N=152) | FSC<br>250/50mcg<br>BID<br>(N=139) | Total<br>(N=418) |
|---------------------------|-----------------------------|-------------------|-----------------------------|------------------------------------|------------------|
| NEOMYCIN                  | 1 (2%)                      | 0                 | 0                           | 0                                  | 1 (<1%)          |
| NYSTATIN                  | 1 (2%)                      | 0                 | 0                           | 0                                  | 1 (<1%)          |
| ONDANSETRON               | 1 (2%)                      | 0                 | 0                           | 0                                  | 1 (<1%)          |
| PANTOTHENIC ACID          | 0                           | 0                 | 1 (<1%)                     | 0                                  | 1 (<1%)          |
| POLYMYXIN B               | 1 (2%)                      | 0                 | 0                           | 0                                  | 1 (<1%)          |
| POTASSIUM GLUCONATE       | 0                           | 0                 | 1 (<1%)                     | 0                                  | 1 (<1%)          |
| PROMETHAZINE              | 0                           | 1 (1%)            | 0                           | 0                                  | 1 (<1%)          |
| PYRIDOXINE                | 0                           | 0                 | 1 (<1%)                     | 0                                  | 1 (<1%)          |
| REPAGLINIDE               | 0                           | 0                 | 0                           | 1 (<1%)                            | 1 (<1%)          |
| ROSIGLITAZONE             | 0                           | 0                 | 0                           | 1 (<1%)                            | 1 (<1%)          |
| SILYBUM MARIANUM          | 0                           | 0                 | 0                           | 1 (<1%)                            | 1 (<1%)          |
| SUCRALFATE                | 0                           | 0                 | 0                           | 1 (<1%)                            | 1 (<1%)          |
| VITAMIN B NOS             | 0                           | 0                 | 1 (<1%)                     | 0                                  | 1 (<1%)          |
| ZEA MAYS                  | 0                           | 0                 | 1 (<1%)                     | 0                                  | 1 (<1%)          |
| CARDIOVASCULAR SYSTEM     |                             |                   |                             |                                    |                  |
| Any medication            | 31 (60%)                    | 47 (63%)          | 93 (61%)                    | 86 (62%)                           | 257 (61%)        |
| LISINOPRIL                | 4 (8%)                      | 13 (17%)          | 24 (16%)                    | 29 (21%)                           | 70 (17%)         |
| HYDROCHLOROTHIAZIDE       | 5 (10%)                     | 7 (9%)            | 23 (15%)                    | 22 (16%)                           | 57 (14%)         |
| SIMVASTATIN               | 6 (12%)                     | 12 (16%)          | 21 (14%)                    | 14 (10%)                           | 53 (13%)         |
| AMLODIPINE BESILATE       | 2 (4%)                      | 4 (5%)            | 9 (6%)                      | 9 (6%)                             | 24 (6%)          |
| ATORVASTATIN CALCIUM      | 4 (8%)                      | 2 (3%)            | 8 (5%)                      | 9 (6%)                             | 23 (6%)          |
| METOPROLOL                | 4 (8%)                      | 3 (4%)            | 10 (7%)                     | 5 (4%)                             | 22 (5%)          |
| AMLODIPINE                | 2 (4%)                      | 3 (4%)            | 9 (6%)                      | 7 (5%)                             | 21 (5%)          |
| FUROSEMIDE                | 6 (12%)                     | 3 (4%)            | 8 (5%)                      | 4 (3%)                             | 21 (5%)          |
| CARVEDILOL                | 3 (6%)                      | 2 (3%)            | 5 (3%)                      | 10 (7%)                            | 20 (5%)          |

Note: A medication may be included in more than one ATC Level category and appear more than once.

Note: The following ingredient terms, which do not have an associated ATC Level 1 term, were also taken during Run-in with the following frequencies: Bovine Prostate: SAL 50mcg-1 subject, <1%, Capsicum Annuum: SAL 50mcg-1 subject, <1%, Dextroamphetamine Saccharate: Placebo-1 subject, 1%, Lactoperoxidase: Placebo-1 subject, 1%, and Zinc Arginate: SAL 50mcg-1 subject, <1%.

dln73797: /arenv/arprod/ccil18781\_gr33343/asq112989/final/drivers/cm\_t004\_noncopddurri.sas 24AUG2010 15:26

110

CONFIDENTIAL

ASQ112989

Protocol: ASQ112989  
Population: Run-in

Page 9 of 23

Table 1.23  
Summary of Non-COPD Medications Taken During the Run-in

| ATC Level 1<br>Ingredient    | Run-in<br>Failure<br>(N=52) | Placebo<br>(N=75) | SAL 50mcg<br>BID<br>(N=152) | FSC<br>250/50mcg<br>BID<br>(N=139) | Total<br>(N=418) |
|------------------------------|-----------------------------|-------------------|-----------------------------|------------------------------------|------------------|
| FISH OIL                     | 3 (6%)                      | 3 (4%)            | 7 (5%)                      | 7 (5%)                             | 20 (5%)          |
| VALSARTAN                    | 4 (8%)                      | 1 (1%)            | 8 (5%)                      | 7 (5%)                             | 20 (5%)          |
| ATENOLOL                     | 0                           | 6 (8%)            | 8 (5%)                      | 4 (3%)                             | 18 (4%)          |
| PRAVASTATIN                  | 3 (6%)                      | 5 (7%)            | 6 (4%)                      | 4 (3%)                             | 18 (4%)          |
| OLMESARTAN                   | 0                           | 2 (3%)            | 9 (6%)                      | 1 (<1%)                            | 12 (3%)          |
| ROSUVASTATIN CALCIUM         | 2 (4%)                      | 1 (1%)            | 4 (3%)                      | 5 (4%)                             | 12 (3%)          |
| LOVASTATIN                   | 1 (2%)                      | 2 (3%)            | 2 (1%)                      | 6 (4%)                             | 11 (3%)          |
| CLONIDINE                    | 0                           | 0                 | 4 (3%)                      | 5 (4%)                             | 9 (2%)           |
| DIGOXIN                      | 2 (4%)                      | 1 (1%)            | 4 (3%)                      | 1 (<1%)                            | 8 (2%)           |
| EZETIMIBE                    | 1 (2%)                      | 2 (3%)            | 4 (3%)                      | 1 (<1%)                            | 8 (2%)           |
| FENOFIBRATE                  | 0                           | 0                 | 4 (3%)                      | 4 (3%)                             | 8 (2%)           |
| GEMFIBROZIL                  | 2 (4%)                      | 1 (1%)            | 2 (1%)                      | 3 (2%)                             | 8 (2%)           |
| TRIAMTERENE                  | 1 (2%)                      | 2 (3%)            | 2 (1%)                      | 3 (2%)                             | 8 (2%)           |
| ENALAPRIL                    | 2 (4%)                      | 0                 | 2 (1%)                      | 3 (2%)                             | 7 (2%)           |
| GLYCERYL TRINITRATE          | 0                           | 1 (1%)            | 4 (3%)                      | 1 (<1%)                            | 6 (1%)           |
| OMEGA-3 MARINE TRIGLYCERIDES | 0                           | 3 (4%)            | 2 (1%)                      | 1 (<1%)                            | 6 (1%)           |
| DILTIAZEM                    | 1 (2%)                      | 0                 | 4 (3%)                      | 0                                  | 5 (1%)           |
| DILTIAZEM HYDROCHLORIDE      | 1 (2%)                      | 0                 | 0                           | 4 (3%)                             | 5 (1%)           |
| METOPROLOL TARTRATE          | 1 (2%)                      | 0                 | 0                           | 4 (3%)                             | 5 (1%)           |
| NEBIVOLOL HYDROCHLORIDE      | 1 (2%)                      | 1 (1%)            | 1 (<1%)                     | 2 (1%)                             | 5 (1%)           |
| NICOTINIC ACID               | 0                           | 0                 | 2 (1%)                      | 3 (2%)                             | 5 (1%)           |
| UBIDECARENONE                | 0                           | 1 (1%)            | 2 (1%)                      | 2 (1%)                             | 5 (1%)           |
| VERAPAMIL                    | 1 (2%)                      | 0                 | 4 (3%)                      | 0                                  | 5 (1%)           |
| BENAZEPRIL                   | 0                           | 0                 | 3 (2%)                      | 1 (<1%)                            | 4 (<1%)          |
| IRBESARTAN                   | 0                           | 0                 | 3 (2%)                      | 1 (<1%)                            | 4 (<1%)          |
| METOPROLOL SUCCINATE         | 0                           | 2 (3%)            | 0                           | 2 (1%)                             | 4 (<1%)          |

Note: A medication may be included in more than one ATC Level category and appear more than once.

Note: The following ingredient terms, which do not have an associated ATC Level 1 term, were also taken during Run-in with the following frequencies: Bovine Prostate: SAL 50mcg-1 subject, <1%, Capsicum Annuum: SAL 50mcg-1 subject, <1%, Dextroamphetamine Saccharate: Placebo-1 subject, 1%, Lactoperoxidase: Placebo-1 subject, 1%, and Zinc Arginate: SAL 50mcg-1 subject, <1%.

dln73797: /arenv/arprod/ccil18781\_gr33343/asq112989/final/drivers/cm\_t004\_noncopddurri.sas 24AUG2010 15:26

111

CONFIDENTIAL

ASQ112989

Protocol: ASQ112989  
Population: Run-in

Page 10 of 23

Table 1.23  
Summary of Non-COPD Medications Taken During the Run-in

| ATC Level 1<br>Ingredient   | Run-in<br>Failure<br>(N=52) | Placebo<br>(N=75) | SAL 50mcg<br>BID<br>(N=152) | FSC<br>250/50mcg<br>BID<br>(N=139) | Total<br>(N=418) |
|-----------------------------|-----------------------------|-------------------|-----------------------------|------------------------------------|------------------|
| TERAZOSIN                   | 0                           | 2 (3%)            | 1 (<1%)                     | 1 (<1%)                            | 4 (<1%)          |
| TORASEMIDE                  | 1 (2%)                      | 0                 | 2 (1%)                      | 1 (<1%)                            | 4 (<1%)          |
| DOXAZOSIN MESILATE          | 0                           | 2 (3%)            | 0                           | 1 (<1%)                            | 3 (<1%)          |
| HYDROCORTISONE              | 1 (2%)                      | 0                 | 2 (1%)                      | 0                                  | 3 (<1%)          |
| LOSARTAN POTASSIUM          | 0                           | 1 (1%)            | 0                           | 2 (1%)                             | 3 (<1%)          |
| NIFEDIPINE                  | 0                           | 0                 | 1 (<1%)                     | 2 (1%)                             | 3 (<1%)          |
| BENAZEPRIL HYDROCHLORIDE    | 0                           | 0                 | 1 (<1%)                     | 1 (<1%)                            | 2 (<1%)          |
| CLONIDINE HYDROCHLORIDE     | 0                           | 0                 | 1 (<1%)                     | 1 (<1%)                            | 2 (<1%)          |
| ISOSORBIDE                  | 1 (2%)                      | 1 (1%)            | 0                           | 0                                  | 2 (<1%)          |
| LIDOCAINE                   | 0                           | 0                 | 2 (1%)                      | 0                                  | 2 (<1%)          |
| METOLAZONE                  | 0                           | 0                 | 2 (1%)                      | 0                                  | 2 (<1%)          |
| MONASCUS PURPUREUS          | 0                           | 1 (1%)            | 0                           | 1 (<1%)                            | 2 (<1%)          |
| NADOLOL                     | 0                           | 1 (1%)            | 0                           | 1 (<1%)                            | 2 (<1%)          |
| PENTOXIFYLLINE              | 0                           | 2 (3%)            | 0                           | 0                                  | 2 (<1%)          |
| PHENYLEPHRINE HYDROCHLORIDE | 0                           | 0                 | 0                           | 2 (1%)                             | 2 (<1%)          |
| PRAVASTATIN SODIUM          | 1 (2%)                      | 0                 | 1 (<1%)                     | 0                                  | 2 (<1%)          |
| QUINAPRIL                   | 0                           | 1 (1%)            | 0                           | 1 (<1%)                            | 2 (<1%)          |
| TADALAFIL                   | 0                           | 1 (1%)            | 0                           | 1 (<1%)                            | 2 (<1%)          |
| TERAZOSIN HYDROCHLORIDE     | 0                           | 1 (1%)            | 0                           | 1 (<1%)                            | 2 (<1%)          |
| ALDACTONE (NOS)             | 0                           | 0                 | 1 (<1%)                     | 0                                  | 1 (<1%)          |
| ALISKIREN FUMARATE          | 1 (2%)                      | 0                 | 0                           | 0                                  | 1 (<1%)          |
| AMIODARONE                  | 0                           | 0                 | 1 (<1%)                     | 0                                  | 1 (<1%)          |
| BISOPROLOL FUMARATE         | 0                           | 0                 | 0                           | 1 (<1%)                            | 1 (<1%)          |
| BUMETANIDE                  | 0                           | 1 (1%)            | 0                           | 0                                  | 1 (<1%)          |
| CAMPHOR                     | 0                           | 0                 | 0                           | 1 (<1%)                            | 1 (<1%)          |
| DOFETILIDE                  | 0                           | 0                 | 0                           | 1 (<1%)                            | 1 (<1%)          |

Note: A medication may be included in more than one ATC Level category and appear more than once.

Note: The following ingredient terms, which do not have an associated ATC Level 1 term, were also taken during Run-in with the following frequencies: Bovine Prostate: SAL 50mcg-1 subject, <1%, Capsicum Annuum: SAL 50mcg-1 subject, <1%, Dextroamphetamine Saccharate: Placebo-1 subject, 1%, Lactoperoxidase: Placebo-1 subject, 1%, and Zinc Arginate: SAL 50mcg-1 subject, <1%.

dln73797: /arenv/arprod/ccil8781\_gr33343/asq112989/final/drivers/cm\_t004\_noncopddurri.sas 24AUG2010 15:26

112

CONFIDENTIAL

ASQ112989



Protocol: ASQ112989  
Population: Run-in

Page 11 of 23

Table 1.23  
Summary of Non-COPD Medications Taken During the Run-in

| ATC Level 1<br>Ingredient | Run-in<br>Failure<br>(N=52) | Placebo<br>(N=75) | SAL 50mcg<br>BID<br>(N=152) | FSC<br>250/50mcg<br>BID<br>(N=139) | Total<br>(N=418) |
|---------------------------|-----------------------------|-------------------|-----------------------------|------------------------------------|------------------|
| DOXAZOSIN                 | 0                           | 1 (1%)            | 0                           | 0                                  | 1 (<1%)          |
| DRONEDARONE               | 0                           | 0                 | 1 (<1%)                     | 0                                  | 1 (<1%)          |
| ENALAPRIL MALEATE         | 0                           | 1 (1%)            | 0                           | 0                                  | 1 (<1%)          |
| FELODIPINE                | 0                           | 0                 | 0                           | 1 (<1%)                            | 1 (<1%)          |
| FLUVASTATIN SODIUM        | 0                           | 0                 | 1 (<1%)                     | 0                                  | 1 (<1%)          |
| HYDRALAZINE               | 0                           | 0                 | 1 (<1%)                     | 0                                  | 1 (<1%)          |
| HYDRALAZINE HYDROCHLORIDE | 0                           | 0                 | 0                           | 1 (<1%)                            | 1 (<1%)          |
| INDAPAMIDE                | 0                           | 0                 | 0                           | 1 (<1%)                            | 1 (<1%)          |
| INDOMETACIN               | 1 (2%)                      | 0                 | 0                           | 0                                  | 1 (<1%)          |
| ISOSORBIDE DINITRATE      | 1 (2%)                      | 0                 | 0                           | 0                                  | 1 (<1%)          |
| MOEXIPRIL HYDROCHLORIDE   | 0                           | 0                 | 0                           | 1 (<1%)                            | 1 (<1%)          |
| NEBIVOLOL                 | 0                           | 0                 | 1 (<1%)                     | 0                                  | 1 (<1%)          |
| PETROSELINUM CRISPUM      | 0                           | 0                 | 1 (<1%)                     | 0                                  | 1 (<1%)          |
| PHYTOSTEROL (NOS)         | 0                           | 1 (1%)            | 0                           | 0                                  | 1 (<1%)          |
| QUINAPRIL HYDROCHLORIDE   | 0                           | 1 (1%)            | 0                           | 0                                  | 1 (<1%)          |
| RAMIPRIL                  | 1 (2%)                      | 0                 | 0                           | 0                                  | 1 (<1%)          |
| ROSUVASTATIN              | 0                           | 1 (1%)            | 0                           | 0                                  | 1 (<1%)          |
| SILODOSIN                 | 0                           | 1 (1%)            | 0                           | 0                                  | 1 (<1%)          |
| SPIRONOLACTONE            | 0                           | 1 (1%)            | 0                           | 0                                  | 1 (<1%)          |
| TELMISARTAN               | 0                           | 0                 | 0                           | 1 (<1%)                            | 1 (<1%)          |
| TIMOLOL                   | 0                           | 0                 | 1 (<1%)                     | 0                                  | 1 (<1%)          |
| TIMOLOL MALEATE           | 0                           | 1 (1%)            | 0                           | 0                                  | 1 (<1%)          |
| TRANDOLAPRIL              | 0                           | 0                 | 1 (<1%)                     | 0                                  | 1 (<1%)          |
| MUSCULO-SKELETAL SYSTEM   |                             |                   |                             |                                    |                  |
| Any medication            | 27 (52%)                    | 47 (63%)          | 71 (47%)                    | 73 (53%)                           | 218 (52%)        |

Note: A medication may be included in more than one ATC Level category and appear more than once.

Note: The following ingredient terms, which do not have an associated ATC Level 1 term, were also taken during Run-in with the following frequencies: Bovine Prostate: SAL 50mcg-1 subject, <1%, Capsicum Annuum: SAL 50mcg-1 subject, <1%, Dextroamphetamine Saccharate: Placebo-1 subject, 1%, Lactoperoxidase: Placebo-1 subject, 1%, and Zinc Arginate: SAL 50mcg-1 subject, <1%.

dln73797: /arenv/arprod/ccil18781\_gr33343/asq112989/final/drivers/cm\_t004\_noncopddurri.sas 24AUG2010 15:26

113

CONFIDENTIAL

ASQ112989

Protocol: ASQ112989  
Population: Run-in

Page 12 of 23

Table 1.23  
Summary of Non-COPD Medications Taken During the Run-in

| ATC Level 1<br>Ingredient | Run-in<br>Failure<br>(N=52) | Placebo<br>(N=75) | SAL 50mcg<br>BID<br>(N=152) | FSC<br>250/50mcg<br>BID<br>(N=139) | Total<br>(N=418) |
|---------------------------|-----------------------------|-------------------|-----------------------------|------------------------------------|------------------|
| ACETYLSALICYLIC ACID      | 13 (25%)                    | 20 (27%)          | 46 (30%)                    | 49 (35%)                           | 128 (31%)        |
| IBUPROFEN                 | 5 (10%)                     | 9 (12%)           | 19 (13%)                    | 12 (9%)                            | 45 (11%)         |
| NAPROXEN SODIUM           | 1 (2%)                      | 7 (9%)            | 6 (4%)                      | 6 (4%)                             | 20 (5%)          |
| ALENDRONATE SODIUM        | 1 (2%)                      | 4 (5%)            | 4 (3%)                      | 3 (2%)                             | 12 (3%)          |
| NAPROXEN                  | 1 (2%)                      | 3 (4%)            | 4 (3%)                      | 4 (3%)                             | 12 (3%)          |
| MELOXICAM                 | 0                           | 5 (7%)            | 1 (<1%)                     | 3 (2%)                             | 9 (2%)           |
| CHONDROITIN               | 0                           | 1 (1%)            | 2 (1%)                      | 2 (1%)                             | 5 (1%)           |
| CYCLOBENZAPRINE           | 1 (2%)                      | 1 (1%)            | 0                           | 3 (2%)                             | 5 (1%)           |
| HYDROCHLORIDE             |                             |                   |                             |                                    |                  |
| GLUCOSAMINE               | 1 (2%)                      | 1 (1%)            | 2 (1%)                      | 1 (<1%)                            | 5 (1%)           |
| RISEDRONATE SODIUM        | 2 (4%)                      | 0                 | 0                           | 3 (2%)                             | 5 (1%)           |
| ALLOPURINOL               | 0                           | 0                 | 3 (2%)                      | 1 (<1%)                            | 4 (<1%)          |
| CELECOXIB                 | 0                           | 1 (1%)            | 1 (<1%)                     | 2 (1%)                             | 4 (<1%)          |
| CARISOPRODOL              | 0                           | 1 (1%)            | 1 (<1%)                     | 1 (<1%)                            | 3 (<1%)          |
| COLCHICINE                | 0                           | 1 (1%)            | 1 (<1%)                     | 1 (<1%)                            | 3 (<1%)          |
| DICLOFENAC                | 0                           | 1 (1%)            | 2 (1%)                      | 0                                  | 3 (<1%)          |
| DIMETHYL SULFONE          | 0                           | 0                 | 2 (1%)                      | 1 (<1%)                            | 3 (<1%)          |
| ALENDRONIC ACID           | 0                           | 1 (1%)            | 0                           | 1 (<1%)                            | 2 (<1%)          |
| CAPSAICIN                 | 0                           | 0                 | 0                           | 2 (1%)                             | 2 (<1%)          |
| CYCLOBENZAPRINE           | 0                           | 0                 | 1 (<1%)                     | 1 (<1%)                            | 2 (<1%)          |
| GLUCOSAMINE SULFATE       | 0                           | 0                 | 1 (<1%)                     | 1 (<1%)                            | 2 (<1%)          |
| NABUMETONE                | 0                           | 0                 | 1 (<1%)                     | 1 (<1%)                            | 2 (<1%)          |
| SODIUM IBANDRONATE        | 1 (2%)                      | 0                 | 1 (<1%)                     | 0                                  | 2 (<1%)          |
| ZOLEDRONIC ACID           | 1 (2%)                      | 0                 | 0                           | 1 (<1%)                            | 2 (<1%)          |
| BACLOFEN                  | 0                           | 0                 | 0                           | 1 (<1%)                            | 1 (<1%)          |
| DICLOFENAC SODIUM         | 0                           | 0                 | 1 (<1%)                     | 0                                  | 1 (<1%)          |

Note: A medication may be included in more than one ATC Level category and appear more than once.

Note: The following ingredient terms, which do not have an associated ATC Level 1 term, were also taken during Run-in with the following frequencies: Bovine Prostate: SAL 50mcg-1 subject, <1%, Capsicum Annuum: SAL 50mcg-1 subject, <1%, Dextroamphetamine Saccharate: Placebo-1 subject, 1%, Lactoperoxidase: Placebo-1 subject, 1%, and Zinc Arginate: SAL 50mcg-1 subject, <1%.

dln73797: /arenv/arprod/ccil18781\_gr33343/asq112989/final/drivers/cm\_t004\_noncopddurri.sas 24AUG2010 15:26

114

CONFIDENTIAL

ASQ112989

Protocol: ASQ112989  
Population: Run-in

Page 13 of 23

Table 1.23  
Summary of Non-COPD Medications Taken During the Run-in

| ATC Level 1<br>Ingredient             | Run-in<br>Failure<br>(N=52) | Placebo<br>(N=75) | SAL 50mcg<br>BID<br>(N=152) | FSC<br>250/50mcg<br>BID<br>(N=139) | Total<br>(N=418) |
|---------------------------------------|-----------------------------|-------------------|-----------------------------|------------------------------------|------------------|
| ETODOLAC                              | 1 (2%)                      | 0                 | 0                           | 0                                  | 1 (<1%)          |
| GLUCOSAMINE HYDROCHLORIDE             | 0                           | 0                 | 1 (<1%)                     | 0                                  | 1 (<1%)          |
| HYALURONIC ACID                       | 0                           | 1 (1%)            | 0                           | 0                                  | 1 (<1%)          |
| INDOMETACIN                           | 1 (2%)                      | 0                 | 0                           | 0                                  | 1 (<1%)          |
| KETOROLAC TROMETAMOL                  | 0                           | 1 (1%)            | 0                           | 0                                  | 1 (<1%)          |
| LEVOMENTHOL                           | 0                           | 0                 | 0                           | 1 (<1%)                            | 1 (<1%)          |
| METAXALONE                            | 0                           | 1 (1%)            | 0                           | 0                                  | 1 (<1%)          |
| OXAPROZIN                             | 1 (2%)                      | 0                 | 0                           | 0                                  | 1 (<1%)          |
| PIROXICAM                             | 0                           | 0                 | 1 (<1%)                     | 0                                  | 1 (<1%)          |
| TIZANIDINE HYDROCHLORIDE              | 0                           | 0                 | 0                           | 1 (<1%)                            | 1 (<1%)          |
| <b>BLOOD AND BLOOD FORMING ORGANS</b> |                             |                   |                             |                                    |                  |
| Any medication                        | 20 (38%)                    | 26 (35%)          | 59 (39%)                    | 62 (45%)                           | 167 (40%)        |
| ACETYLSALICYLIC ACID                  | 13 (25%)                    | 20 (27%)          | 46 (30%)                    | 49 (35%)                           | 128 (31%)        |
| CLOPIDOGREL BISULFATE                 | 4 (8%)                      | 3 (4%)            | 7 (5%)                      | 6 (4%)                             | 20 (5%)          |
| CYANOCOBALAMIN                        | 2 (4%)                      | 3 (4%)            | 8 (5%)                      | 4 (3%)                             | 17 (4%)          |
| POTASSIUM CHLORIDE                    | 0                           | 3 (4%)            | 4 (3%)                      | 6 (4%)                             | 13 (3%)          |
| FOLIC ACID                            | 0                           | 1 (1%)            | 3 (2%)                      | 2 (1%)                             | 6 (1%)           |
| POTASSIUM NOS                         | 1 (2%)                      | 0                 | 3 (2%)                      | 2 (1%)                             | 6 (1%)           |
| WARFARIN SODIUM                       | 2 (4%)                      | 0                 | 2 (1%)                      | 2 (1%)                             | 6 (1%)           |
| FERROUS SULPHATE                      | 0                           | 1 (1%)            | 0                           | 4 (3%)                             | 5 (1%)           |
| DIPYRIDAMOLE                          | 0                           | 2 (3%)            | 1 (<1%)                     | 0                                  | 3 (<1%)          |
| WARFARIN                              | 0                           | 0                 | 2 (1%)                      | 1 (<1%)                            | 3 (<1%)          |
| SODIUM BICARBONATE                    | 0                           | 0                 | 0                           | 2 (1%)                             | 2 (<1%)          |
| SODIUM CHLORIDE                       | 0                           | 1 (1%)            | 0                           | 1 (<1%)                            | 2 (<1%)          |
| CILOSTAZOL                            | 0                           | 0                 | 0                           | 1 (<1%)                            | 1 (<1%)          |

Note: A medication may be included in more than one ATC Level category and appear more than once.  
 Note: The following ingredient terms, which do not have an associated ATC Level 1 term, were also taken during Run-in with the following frequencies: Bovine Prostate: SAL 50mcg-1 subject, <1%, Capsicum Annuum: SAL 50mcg-1 subject, <1%, Dextroamphetamine Saccharate: Placebo-1 subject, 1%, Lactoperoxidase: Placebo-1 subject, 1%, and Zinc Arginate: SAL 50mcg-1 subject, <1%.  
 dln73797: /arenv/arprod/ccil18781\_gr33343/asq112989/final/drivers/cm\_t004\_noncopddurri.sas 24AUG2010 15:26

Protocol: ASQ112989  
Population: Run-in

Page 14 of 23

Table 1.23  
Summary of Non-COPD Medications Taken During the Run-in

| ATC Level 1<br>Ingredient                 | Run-in<br>Failure<br>(N=52) | Placebo<br>(N=75) | SAL 50mcg<br>BID<br>(N=152) | FSC<br>250/50mcg<br>BID<br>(N=139) | Total<br>(N=418) |
|-------------------------------------------|-----------------------------|-------------------|-----------------------------|------------------------------------|------------------|
| ELECTROLYTES NOS                          | 0                           | 0                 | 0                           | 1 (<1%)                            | 1 (<1%)          |
| FERROUS GLUCONATE                         | 0                           | 0                 | 0                           | 1 (<1%)                            | 1 (<1%)          |
| GLUCOSE OXIDASE                           | 0                           | 1 (1%)            | 0                           | 0                                  | 1 (<1%)          |
| IRON                                      | 0                           | 0                 | 1 (<1%)                     | 0                                  | 1 (<1%)          |
| NEOMYCIN                                  | 1 (2%)                      | 0                 | 0                           | 0                                  | 1 (<1%)          |
| GENITO URINARY SYSTEM AND SEX<br>HORMONES |                             |                   |                             |                                    |                  |
| Any medication                            | 14 (27%)                    | 23 (31%)          | 41 (27%)                    | 37 (27%)                           | 115 (28%)        |
| IBUPROFEN                                 | 5 (10%)                     | 9 (12%)           | 19 (13%)                    | 12 (9%)                            | 45 (11%)         |
| NAPROXEN SODIUM                           | 1 (2%)                      | 7 (9%)            | 6 (4%)                      | 6 (4%)                             | 20 (5%)          |
| NAPROXEN                                  | 1 (2%)                      | 3 (4%)            | 4 (3%)                      | 4 (3%)                             | 12 (3%)          |
| ESTRADIOL                                 | 1 (2%)                      | 1 (1%)            | 2 (1%)                      | 1 (<1%)                            | 5 (1%)           |
| TAMSULOSIN HYDROCHLORIDE                  | 0                           | 1 (1%)            | 1 (<1%)                     | 3 (2%)                             | 5 (1%)           |
| TERAZOSIN                                 | 0                           | 2 (3%)            | 1 (<1%)                     | 1 (<1%)                            | 4 (<1%)          |
| DIMETHYL SULFONE                          | 0                           | 0                 | 2 (1%)                      | 1 (<1%)                            | 3 (<1%)          |
| DOXAZOSIN MESILATE                        | 0                           | 2 (3%)            | 0                           | 1 (<1%)                            | 3 (<1%)          |
| DUTASTERIDE                               | 0                           | 0                 | 1 (<1%)                     | 2 (1%)                             | 3 (<1%)          |
| ESTROGENS CONJUGATED                      | 1 (2%)                      | 0                 | 0                           | 2 (1%)                             | 3 (<1%)          |
| FINASTERIDE                               | 0                           | 2 (3%)            | 1 (<1%)                     | 0                                  | 3 (<1%)          |
| SERENOA REPENS                            | 0                           | 0                 | 1 (<1%)                     | 2 (1%)                             | 3 (<1%)          |
| SILDENAFIL CITRATE                        | 1 (2%)                      | 0                 | 2 (1%)                      | 0                                  | 3 (<1%)          |
| TOLTERODINE TARTRATE                      | 0                           | 0                 | 2 (1%)                      | 1 (<1%)                            | 3 (<1%)          |
| ALFUZOSIN HYDROCHLORIDE                   | 0                           | 0                 | 1 (<1%)                     | 1 (<1%)                            | 2 (<1%)          |
| COPPER                                    | 0                           | 0                 | 2 (1%)                      | 0                                  | 2 (<1%)          |
| METRONIDAZOLE                             | 1 (2%)                      | 0                 | 1 (<1%)                     | 0                                  | 2 (<1%)          |

Note: A medication may be included in more than one ATC Level category and appear more than once.

Note: The following ingredient terms, which do not have an associated ATC Level 1 term, were also taken during Run-in with the following frequencies: Bovine Prostate: SAL 50mcg-1 subject, <1%, Capsicum Annuum: SAL 50mcg-1 subject, <1%, Dextroamphetamine Saccharate: Placebo-1 subject, 1%, Lactoperoxidase: Placebo-1 subject, 1%, and Zinc Arginate: SAL 50mcg-1 subject, <1%.

dln73797: /arenv/arprod/ccil18781\_gr33343/asq112989/final/drivers/cm\_t004\_noncopddurri.sas 24AUG2010 15:26

116

CONFIDENTIAL

ASQ112989

Protocol: ASQ112989  
Population: Run-in

Page 15 of 23

Table 1.23  
Summary of Non-COPD Medications Taken During the Run-in

| ATC Level 1<br>Ingredient        | Run-in<br>Failure<br>(N=52) | Placebo<br>(N=75) | SAL 50mcg<br>BID<br>(N=152) | FSC<br>250/50mcg<br>BID<br>(N=139) | Total<br>(N=418) |
|----------------------------------|-----------------------------|-------------------|-----------------------------|------------------------------------|------------------|
| OXYBUTYNIN HYDROCHLORIDE         | 0                           | 0                 | 0                           | 2 (1%)                             | 2 (<1%)          |
| TADALAFIL                        | 0                           | 1 (1%)            | 0                           | 1 (<1%)                            | 2 (<1%)          |
| TAMSULOSIN                       | 1 (2%)                      | 1 (1%)            | 0                           | 0                                  | 2 (<1%)          |
| TERAZOSIN HYDROCHLORIDE          | 0                           | 1 (1%)            | 0                           | 1 (<1%)                            | 2 (<1%)          |
| DOXAZOSIN                        | 0                           | 1 (1%)            | 0                           | 0                                  | 1 (<1%)          |
| KETOCONAZOLE                     | 0                           | 0                 | 0                           | 1 (<1%)                            | 1 (<1%)          |
| MAGNESIUM HYDROXIDE              | 1 (2%)                      | 0                 | 0                           | 0                                  | 1 (<1%)          |
| MEDROXYPROGESTERONE ACETATE      | 1 (2%)                      | 0                 | 0                           | 0                                  | 1 (<1%)          |
| METHYLTHIONINIUM CHLORIDE        | 0                           | 1 (1%)            | 0                           | 0                                  | 1 (<1%)          |
| NORETHISTERONE ACETATE           | 0                           | 0                 | 0                           | 1 (<1%)                            | 1 (<1%)          |
| NYSTATIN                         | 1 (2%)                      | 0                 | 0                           | 0                                  | 1 (<1%)          |
| PHENAZOPYRIDINE<br>HYDROCHLORIDE | 0                           | 0                 | 1 (<1%)                     | 0                                  | 1 (<1%)          |
| PHENYL SALICYLATE                | 0                           | 1 (1%)            | 0                           | 0                                  | 1 (<1%)          |
| RALOXIFENE HYDROCHLORIDE         | 0                           | 1 (1%)            | 0                           | 0                                  | 1 (<1%)          |
| SILODOSIN                        | 0                           | 1 (1%)            | 0                           | 0                                  | 1 (<1%)          |
| SODIUM PHOSPHATE MONOBASIC       | 0                           | 1 (1%)            | 0                           | 0                                  | 1 (<1%)          |
| SOLIFENACIN SUCCINATE            | 0                           | 0                 | 1 (<1%)                     | 0                                  | 1 (<1%)          |
| VARDENAFIL                       | 0                           | 0                 | 0                           | 1 (<1%)                            | 1 (<1%)          |
| RESPIRATORY SYSTEM               |                             |                   |                             |                                    |                  |
| Any medication                   | 16 (31%)                    | 12 (16%)          | 40 (26%)                    | 32 (23%)                           | 100 (24%)        |
| HYDROCODONE BITARTRATE           | 6 (12%)                     | 3 (4%)            | 15 (10%)                    | 10 (7%)                            | 34 (8%)          |
| HYDROCODONE                      | 2 (4%)                      | 2 (3%)            | 6 (4%)                      | 3 (2%)                             | 13 (3%)          |
| GUAIFENESIN                      | 2 (4%)                      | 1 (1%)            | 1 (<1%)                     | 2 (1%)                             | 6 (1%)           |
| CETIRIZINE HYDROCHLORIDE         | 2 (4%)                      | 1 (1%)            | 1 (<1%)                     | 1 (<1%)                            | 5 (1%)           |

Note: A medication may be included in more than one ATC Level category and appear more than once.

Note: The following ingredient terms, which do not have an associated ATC Level 1 term, were also taken during Run-in with the following frequencies: Bovine Prostate: SAL 50mcg-1 subject, <1%, Capsicum Annuum: SAL 50mcg-1 subject, <1%, Dextroamphetamine Saccharate: Placebo-1 subject, 1%, Lactoperoxidase: Placebo-1 subject, 1%, and Zinc Arginate: SAL 50mcg-1 subject, <1%.

dln73797: /arenv/arprod/ccil8781\_gr33343/asq112989/final/drivers/cm\_t004\_noncopddurri.sas 24AUG2010 15:26

117

CONFIDENTIAL

ASQ112989

Protocol: ASQ112989  
Population: Run-in

Page 16 of 23

Table 1.23  
Summary of Non-COPD Medications Taken During the Run-in

| ATC Level 1<br>Ingredient   | Run-in<br>Failure<br>(N=52) | Placebo<br>(N=75) | SAL 50mcg<br>BID<br>(N=152) | FSC<br>250/50mcg<br>BID<br>(N=139) | Total<br>(N=418) |
|-----------------------------|-----------------------------|-------------------|-----------------------------|------------------------------------|------------------|
| DIPHENHYDRAMINE             | 1 (2%)                      | 0                 | 3 (2%)                      | 1 (<1%)                            | 5 (1%)           |
| HYDROCHLORIDE               |                             |                   |                             |                                    |                  |
| BENADRYL (NOS)              | 0                           | 0                 | 1 (<1%)                     | 3 (2%)                             | 4 (<1%)          |
| DIPHENHYDRAMINE             | 0                           | 1 (1%)            | 1 (<1%)                     | 2 (1%)                             | 4 (<1%)          |
| CETIRIZINE                  | 1 (2%)                      | 0                 | 1 (<1%)                     | 1 (<1%)                            | 3 (<1%)          |
| CHLORPHENAMINE MALEATE      | 0                           | 1 (1%)            | 1 (<1%)                     | 1 (<1%)                            | 3 (<1%)          |
| DEXTROMETHORPHAN            | 1 (2%)                      | 1 (1%)            | 0                           | 1 (<1%)                            | 3 (<1%)          |
| HYDROBROMIDE                |                             |                   |                             |                                    |                  |
| DOXYLAMINE SUCCINATE        | 1 (2%)                      | 1 (1%)            | 0                           | 1 (<1%)                            | 3 (<1%)          |
| FLUTICASONE PROPIONATE      | 1 (2%)                      | 0                 | 1 (<1%)                     | 1 (<1%)                            | 3 (<1%)          |
| PSEUDOEPHEDRINE             | 0                           | 2 (3%)            | 0                           | 1 (<1%)                            | 3 (<1%)          |
| HYDROCHLORIDE               |                             |                   |                             |                                    |                  |
| FEXOFENADINE                | 0                           | 1 (1%)            | 0                           | 1 (<1%)                            | 2 (<1%)          |
| FEXOFENADINE HYDROCHLORIDE  | 0                           | 0                 | 2 (1%)                      | 0                                  | 2 (<1%)          |
| LIDOCAINE                   | 0                           | 0                 | 2 (1%)                      | 0                                  | 2 (<1%)          |
| LORATADINE                  | 0                           | 1 (1%)            | 1 (<1%)                     | 0                                  | 2 (<1%)          |
| MOMETASONE FUROATE          | 2 (4%)                      | 0                 | 0                           | 0                                  | 2 (<1%)          |
| PHENYLEPHRINE HYDROCHLORIDE | 0                           | 0                 | 0                           | 2 (1%)                             | 2 (<1%)          |
| RETINOL                     | 1 (2%)                      | 0                 | 1 (<1%)                     | 0                                  | 2 (<1%)          |
| SODIUM CHLORIDE             | 0                           | 1 (1%)            | 0                           | 1 (<1%)                            | 2 (<1%)          |
| SUDAFED (NOS)               | 1 (2%)                      | 0                 | 1 (<1%)                     | 0                                  | 2 (<1%)          |
| ACETYLCYSTEINE              | 0                           | 0                 | 1 (<1%)                     | 0                                  | 1 (<1%)          |
| ATROPINE SULFATE            | 0                           | 0                 | 1 (<1%)                     | 0                                  | 1 (<1%)          |
| BENZONATATE                 | 0                           | 0                 | 0                           | 1 (<1%)                            | 1 (<1%)          |
| BUDESONIDE                  | 1 (2%)                      | 0                 | 0                           | 0                                  | 1 (<1%)          |
| CHLORPHENAMINE              | 0                           | 0                 | 0                           | 1 (<1%)                            | 1 (<1%)          |

Note: A medication may be included in more than one ATC Level category and appear more than once.

Note: The following ingredient terms, which do not have an associated ATC Level 1 term, were also taken during Run-in with the following frequencies: Bovine Prostate: SAL 50mcg-1 subject, <1%, Capsicum Annuum: SAL 50mcg-1 subject, <1%, Dextroamphetamine Saccharate: Placebo-1 subject, 1%, Lactoperoxidase: Placebo-1 subject, 1%, and Zinc Arginate: SAL 50mcg-1 subject, <1%.

dln73797: /arenv/arprod/ccil18781\_gr33343/asq112989/final/drivers/cm\_t004\_noncopddurri.sas 24AUG2010 15:26

118

CONFIDENTIAL

ASQ112989

Protocol: ASQ112989  
Population: Run-in

Page 17 of 23

Table 1.23  
Summary of Non-COPD Medications Taken During the Run-in

| ATC Level 1<br>Ingredient         | Run-in<br>Failure<br>(N=52) | Placebo<br>(N=75) | SAL 50mcg<br>BID<br>(N=152) | FSC<br>250/50mcg<br>BID<br>(N=139) | Total<br>(N=418) |
|-----------------------------------|-----------------------------|-------------------|-----------------------------|------------------------------------|------------------|
| COCAINE                           | 0                           | 0                 | 0                           | 1 (<1%)                            | 1 (<1%)          |
| CODEINE                           | 0                           | 0                 | 0                           | 1 (<1%)                            | 1 (<1%)          |
| DESLORATADINE                     | 0                           | 0                 | 0                           | 1 (<1%)                            | 1 (<1%)          |
| DIPHENHYDRAMINE CITRATE           | 0                           | 0                 | 1 (<1%)                     | 0                                  | 1 (<1%)          |
| LEVOCETIRIZINE HYDROCHLORIDE      | 0                           | 0                 | 1 (<1%)                     | 0                                  | 1 (<1%)          |
| LEVOMENTHOL                       | 0                           | 0                 | 0                           | 1 (<1%)                            | 1 (<1%)          |
| MECLOZINE                         | 0                           | 0                 | 1 (<1%)                     | 0                                  | 1 (<1%)          |
| MONTELUKAST SODIUM                | 0                           | 0                 | 1 (<1%)                     | 0                                  | 1 (<1%)          |
| NEOMYCIN                          | 1 (2%)                      | 0                 | 0                           | 0                                  | 1 (<1%)          |
| OXYGEN                            | 0                           | 0                 | 0                           | 1 (<1%)                            | 1 (<1%)          |
| OXYMETAZOLINE HYDROCHLORIDE       | 0                           | 0                 | 1 (<1%)                     | 0                                  | 1 (<1%)          |
| PHENYLPROPANOLAMINE<br>BITARTRATE | 0                           | 0                 | 0                           | 1 (<1%)                            | 1 (<1%)          |
| PROMETHAZINE                      | 0                           | 1 (1%)            | 0                           | 0                                  | 1 (<1%)          |
| PSEUDOEPHEDRINE                   | 0                           | 0                 | 0                           | 1 (<1%)                            | 1 (<1%)          |
| SALBUTAMOL                        | 0                           | 0                 | 1 (<1%)                     | 0                                  | 1 (<1%)          |
| TYLENOL COLD NOS                  | 0                           | 0                 | 1 (<1%)                     | 0                                  | 1 (<1%)          |
| DERMATOLOGICALS                   |                             |                   |                             |                                    |                  |
| Any medication                    | 10 (19%)                    | 10 (13%)          | 20 (13%)                    | 15 (11%)                           | 55 (13%)         |
| TOCOPHEROL                        | 3 (6%)                      | 2 (3%)            | 4 (3%)                      | 2 (1%)                             | 11 (3%)          |
| GLYCERYL TRINITRATE               | 0                           | 1 (1%)            | 4 (3%)                      | 1 (<1%)                            | 6 (1%)           |
| DIPHENHYDRAMINE<br>HYDROCHLORIDE  | 1 (2%)                      | 0                 | 3 (2%)                      | 1 (<1%)                            | 5 (1%)           |
| BENADRYL (NOS)                    | 0                           | 0                 | 1 (<1%)                     | 3 (2%)                             | 4 (<1%)          |
| DIPHENHYDRAMINE                   | 0                           | 1 (1%)            | 1 (<1%)                     | 2 (1%)                             | 4 (<1%)          |

Note: A medication may be included in more than one ATC Level category and appear more than once.

Note: The following ingredient terms, which do not have an associated ATC Level 1 term, were also taken during Run-in with the following frequencies: Bovine Prostate: SAL 50mcg-1 subject, <1%, Capsicum Annuum: SAL 50mcg-1 subject, <1%, Dextroamphetamine Saccharate: Placebo-1 subject, 1%, Lactoperoxidase: Placebo-1 subject, 1%, and Zinc Arginate: SAL 50mcg-1 subject, <1%.

dln73797: /arenv/arprod/ccil8781\_gr33343/asq112989/final/drivers/cm\_t004\_noncopddurri.sas 24AUG2010 15:26

119

CONFIDENTIAL

ASQ112989

Protocol: ASQ112989  
Population: Run-in

Page 18 of 23

Table 1.23  
Summary of Non-COPD Medications Taken During the Run-in

| ATC Level 1<br>Ingredient | Run-in<br>Failure<br>(N=52) | Placebo<br>(N=75) | SAL 50mcg<br>BID<br>(N=152) | FSC<br>250/50mcg<br>BID<br>(N=139) | Total<br>(N=418) |
|---------------------------|-----------------------------|-------------------|-----------------------------|------------------------------------|------------------|
| FINASTERIDE               | 0                           | 2 (3%)            | 1 (<1%)                     | 0                                  | 3 (<1%)          |
| FLUTICASONE PROPIONATE    | 1 (2%)                      | 0                 | 1 (<1%)                     | 1 (<1%)                            | 3 (<1%)          |
| HYDROCORTISONE            | 1 (2%)                      | 0                 | 2 (1%)                      | 0                                  | 3 (<1%)          |
| ACYCLOVIR                 | 0                           | 0                 | 1 (<1%)                     | 1 (<1%)                            | 2 (<1%)          |
| BETACAROTENE              | 0                           | 0                 | 2 (1%)                      | 0                                  | 2 (<1%)          |
| LIDOCAINE                 | 0                           | 0                 | 2 (1%)                      | 0                                  | 2 (<1%)          |
| METRONIDAZOLE             | 1 (2%)                      | 0                 | 1 (<1%)                     | 0                                  | 2 (<1%)          |
| MOMETASONE FUROATE        | 2 (4%)                      | 0                 | 0                           | 0                                  | 2 (<1%)          |
| RETINOL                   | 1 (2%)                      | 0                 | 1 (<1%)                     | 0                                  | 2 (<1%)          |
| SELENIUM                  | 0                           | 0                 | 1 (<1%)                     | 1 (<1%)                            | 2 (<1%)          |
| ZINC OXIDE                | 0                           | 0                 | 2 (1%)                      | 0                                  | 2 (<1%)          |
| AMINO BENZOIC ACID        | 0                           | 0                 | 0                           | 1 (<1%)                            | 1 (<1%)          |
| BUDESONIDE                | 1 (2%)                      | 0                 | 0                           | 0                                  | 1 (<1%)          |
| CAMPHOR                   | 0                           | 0                 | 0                           | 1 (<1%)                            | 1 (<1%)          |
| COCAINE                   | 0                           | 0                 | 0                           | 1 (<1%)                            | 1 (<1%)          |
| DIPHENHYDRAMINE CITRATE   | 0                           | 0                 | 1 (<1%)                     | 0                                  | 1 (<1%)          |
| HYALURONIC ACID           | 0                           | 1 (1%)            | 0                           | 0                                  | 1 (<1%)          |
| ISOSORBIDE DINITRATE      | 1 (2%)                      | 0                 | 0                           | 0                                  | 1 (<1%)          |
| KETOCONAZOLE              | 0                           | 0                 | 0                           | 1 (<1%)                            | 1 (<1%)          |
| LEVOMENTHOL               | 0                           | 0                 | 0                           | 1 (<1%)                            | 1 (<1%)          |
| LYSOZYME                  | 0                           | 1 (1%)            | 0                           | 0                                  | 1 (<1%)          |
| NEOMYCIN                  | 1 (2%)                      | 0                 | 0                           | 0                                  | 1 (<1%)          |
| NYSTATIN                  | 1 (2%)                      | 0                 | 0                           | 0                                  | 1 (<1%)          |
| PHENYL SALICYLATE         | 0                           | 1 (1%)            | 0                           | 0                                  | 1 (<1%)          |
| PROMETHAZINE              | 0                           | 1 (1%)            | 0                           | 0                                  | 1 (<1%)          |
| SALICYLIC ACID            | 0                           | 0                 | 0                           | 1 (<1%)                            | 1 (<1%)          |

Note: A medication may be included in more than one ATC Level category and appear more than once.

Note: The following ingredient terms, which do not have an associated ATC Level 1 term, were also taken during Run-in with the following frequencies: Bovine Prostate: SAL 50mcg-1 subject, <1%, Capsicum Annuum: SAL 50mcg-1 subject, <1%, Dextroamphetamine Saccharate: Placebo-1 subject, 1%, Lactoperoxidase: Placebo-1 subject, 1%, and Zinc Arginate: SAL 50mcg-1 subject, <1%.

dln73797: /arenv/arprod/ccil18781\_gr33343/asq112989/final/drivers/cm\_t004\_noncopddurri.sas 24AUG2010 15:26

120

CONFIDENTIAL

ASQ112989



Protocol: ASQ112989  
Population: Run-in

Page 19 of 23

Table 1.23  
Summary of Non-COPD Medications Taken During the Run-in

| ATC Level 1<br>Ingredient   | Run-in<br>Failure<br>(N=52) | Placebo<br>(N=75) | SAL 50mcg<br>BID<br>(N=152) | FSC<br>250/50mcg<br>BID<br>(N=139) | Total<br>(N=418) |
|-----------------------------|-----------------------------|-------------------|-----------------------------|------------------------------------|------------------|
| SENSORY ORGANS              |                             |                   |                             |                                    |                  |
| Any medication              | 5 (10%)                     | 7 (9%)            | 19 (13%)                    | 14 (10%)                           | 45 (11%)         |
| CLONIDINE                   | 0                           | 0                 | 4 (3%)                      | 5 (4%)                             | 9 (2%)           |
| CIPROFLOXACIN               | 0                           | 0                 | 3 (2%)                      | 0                                  | 3 (<1%)          |
| DICLOFENAC                  | 0                           | 1 (1%)            | 2 (1%)                      | 0                                  | 3 (<1%)          |
| HYDROCORTISONE              | 1 (2%)                      | 0                 | 2 (1%)                      | 0                                  | 3 (<1%)          |
| ACYCLOVIR                   | 0                           | 0                 | 1 (<1%)                     | 1 (<1%)                            | 2 (<1%)          |
| BENZYL PENICILLIN           | 0                           | 1 (1%)            | 0                           | 1 (<1%)                            | 2 (<1%)          |
| CLONIDINE HYDROCHLORIDE     | 0                           | 0                 | 1 (<1%)                     | 1 (<1%)                            | 2 (<1%)          |
| ISOSORBIDE                  | 1 (2%)                      | 1 (1%)            | 0                           | 0                                  | 2 (<1%)          |
| LATANOPROST                 | 0                           | 1 (1%)            | 1 (<1%)                     | 0                                  | 2 (<1%)          |
| LIDOCAINE                   | 0                           | 0                 | 2 (1%)                      | 0                                  | 2 (<1%)          |
| PHENYLEPHRINE HYDROCHLORIDE | 0                           | 0                 | 0                           | 2 (1%)                             | 2 (<1%)          |
| RETINOL                     | 1 (2%)                      | 0                 | 1 (<1%)                     | 0                                  | 2 (<1%)          |
| SODIUM CHLORIDE             | 0                           | 1 (1%)            | 0                           | 1 (<1%)                            | 2 (<1%)          |
| ACETYLCYSTEINE              | 0                           | 0                 | 1 (<1%)                     | 0                                  | 1 (<1%)          |
| ATROPINE SULFATE            | 0                           | 0                 | 1 (<1%)                     | 0                                  | 1 (<1%)          |
| BRIMONIDINE TARTRATE        | 0                           | 0                 | 1 (<1%)                     | 0                                  | 1 (<1%)          |
| COCAINE                     | 0                           | 0                 | 0                           | 1 (<1%)                            | 1 (<1%)          |
| CORTISONE                   | 1 (2%)                      | 0                 | 0                           | 0                                  | 1 (<1%)          |
| DICLOFENAC SODIUM           | 0                           | 0                 | 1 (<1%)                     | 0                                  | 1 (<1%)          |
| HYALURONIC ACID             | 0                           | 1 (1%)            | 0                           | 0                                  | 1 (<1%)          |
| HYOSCINE HYDROBROMIDE       | 0                           | 0                 | 1 (<1%)                     | 0                                  | 1 (<1%)          |
| INDOMETACIN                 | 1 (2%)                      | 0                 | 0                           | 0                                  | 1 (<1%)          |
| INTERFERON BETA             | 0                           | 0                 | 0                           | 1 (<1%)                            | 1 (<1%)          |

Note: A medication may be included in more than one ATC Level category and appear more than once.  
 Note: The following ingredient terms, which do not have an associated ATC Level 1 term, were also taken during Run-in with the following frequencies: Bovine Prostate: SAL 50mcg-1 subject, <1%, Capsicum Annuum: SAL 50mcg-1 subject, <1%, Dextroamphetamine Saccharate: Placebo-1 subject, 1%, Lactoperoxidase: Placebo-1 subject, 1%, and Zinc Arginate: SAL 50mcg-1 subject, <1%.  
 dln73797: /arenv/arprod/ccil18781\_gr33343/asq112989/final/drivers/cm\_t004\_noncopddurri.sas 24AUG2010 15:26

121

CONFIDENTIAL

ASQ112989

Protocol: ASQ112989  
Population: Run-in

Page 20 of 23

Table 1.23  
Summary of Non-COPD Medications Taken During the Run-in

| ATC Level 1<br>Ingredient                                             | Run-in<br>Failure<br>(N=52) | Placebo<br>(N=75) | SAL 50mcg<br>BID<br>(N=152) | FSC<br>250/50mcg<br>BID<br>(N=139) | Total<br>(N=418) |
|-----------------------------------------------------------------------|-----------------------------|-------------------|-----------------------------|------------------------------------|------------------|
| KETOROLAC TROMETAMOL                                                  | 0                           | 1 (1%)            | 0                           | 0                                  | 1 (<1%)          |
| MACROGOL                                                              | 0                           | 0                 | 0                           | 1 (<1%)                            | 1 (<1%)          |
| OPTIVE (NOS)                                                          | 0                           | 0                 | 0                           | 1 (<1%)                            | 1 (<1%)          |
| OXYMETAZOLINE HYDROCHLORIDE                                           | 0                           | 0                 | 1 (<1%)                     | 0                                  | 1 (<1%)          |
| PIROXICAM                                                             | 0                           | 0                 | 1 (<1%)                     | 0                                  | 1 (<1%)          |
| POLYMYXIN B                                                           | 1 (2%)                      | 0                 | 0                           | 0                                  | 1 (<1%)          |
| SALICYLIC ACID                                                        | 0                           | 0                 | 0                           | 1 (<1%)                            | 1 (<1%)          |
| TIMOLOL                                                               | 0                           | 0                 | 1 (<1%)                     | 0                                  | 1 (<1%)          |
| TIMOLOL MALEATE                                                       | 0                           | 1 (1%)            | 0                           | 0                                  | 1 (<1%)          |
| SYSTEMIC HORMONAL<br>PREPARATIONS, EXCL. SEX<br>HORMONES AND INSULINS |                             |                   |                             |                                    |                  |
| Any medication                                                        | 10 (19%)                    | 5 (7%)            | 15 (10%)                    | 9 (6%)                             | 39 (9%)          |
| LEVOTHYROXINE                                                         | 3 (6%)                      | 1 (1%)            | 8 (5%)                      | 3 (2%)                             | 15 (4%)          |
| LEVOTHYROXINE SODIUM                                                  | 2 (4%)                      | 3 (4%)            | 5 (3%)                      | 5 (4%)                             | 15 (4%)          |
| HYDROCORTISONE                                                        | 1 (2%)                      | 0                 | 2 (1%)                      | 0                                  | 3 (<1%)          |
| PREDNISONE                                                            | 3 (6%)                      | 0                 | 0                           | 0                                  | 3 (<1%)          |
| BUDESONIDE                                                            | 1 (2%)                      | 0                 | 0                           | 0                                  | 1 (<1%)          |
| CALCITONIN, SALMON                                                    | 0                           | 1 (1%)            | 0                           | 0                                  | 1 (<1%)          |
| CORTISONE                                                             | 1 (2%)                      | 0                 | 0                           | 0                                  | 1 (<1%)          |
| MELATONIN                                                             | 0                           | 0                 | 1 (<1%)                     | 0                                  | 1 (<1%)          |
| THIAMAZOLE                                                            | 0                           | 0                 | 0                           | 1 (<1%)                            | 1 (<1%)          |
| ANTIINFECTIVES FOR SYSTEMIC<br>USE                                    |                             |                   |                             |                                    |                  |

Note: A medication may be included in more than one ATC Level category and appear more than once.

Note: The following ingredient terms, which do not have an associated ATC Level 1 term, were also taken during Run-in with the following frequencies: Bovine Prostate: SAL 50mcg-1 subject, <1%, Capsicum Annuum: SAL 50mcg-1 subject, <1%, Dextroamphetamine Saccharate: Placebo-1 subject, 1%, Lactoperoxidase: Placebo-1 subject, 1%, and Zinc Arginate: SAL 50mcg-1 subject, <1%.

dln73797: /arenv/arprod/ccil8781\_gr33343/asq112989/final/drivers/cm\_t004\_noncopddurri.sas 24AUG2010 15:26

CONFIDENTIAL

ASQ112989

Protocol: ASQ112989  
Population: Run-in

Page 21 of 23

Table 1.23  
Summary of Non-COPD Medications Taken During the Run-in

| ATC Level 1<br>Ingredient        | Run-in<br>Failure<br>(N=52) | Placebo<br>(N=75) | SAL 50mcg<br>BID<br>(N=152) | FSC<br>250/50mcg<br>BID<br>(N=139) | Total<br>(N=418) |
|----------------------------------|-----------------------------|-------------------|-----------------------------|------------------------------------|------------------|
| Any medication                   | 4 (8%)                      | 4 (5%)            | 8 (5%)                      | 6 (4%)                             | 22 (5%)          |
| AMOXICILLIN                      | 0                           | 2 (3%)            | 3 (2%)                      | 0                                  | 5 (1%)           |
| CIPROFLOXACIN                    | 0                           | 0                 | 3 (2%)                      | 0                                  | 3 (<1%)          |
| ACYCLOVIR                        | 0                           | 0                 | 1 (<1%)                     | 1 (<1%)                            | 2 (<1%)          |
| BENZYLPENICILLIN                 | 0                           | 1 (1%)            | 0                           | 1 (<1%)                            | 2 (<1%)          |
| METRONIDAZOLE                    | 1 (2%)                      | 0                 | 1 (<1%)                     | 0                                  | 2 (<1%)          |
| AZITHROMYCIN                     | 1 (2%)                      | 0                 | 0                           | 0                                  | 1 (<1%)          |
| CEFALEXIN                        | 0                           | 0                 | 0                           | 1 (<1%)                            | 1 (<1%)          |
| CLARITHROMYCIN                   | 1 (2%)                      | 0                 | 0                           | 0                                  | 1 (<1%)          |
| DOXYCYCLINE                      | 0                           | 0                 | 1 (<1%)                     | 0                                  | 1 (<1%)          |
| EFAVIRENZ                        | 0                           | 0                 | 1 (<1%)                     | 0                                  | 1 (<1%)          |
| EMTRICITABINE                    | 0                           | 0                 | 1 (<1%)                     | 0                                  | 1 (<1%)          |
| IMMUNOGLOBULINS NOS              | 0                           | 0                 | 0                           | 1 (<1%)                            | 1 (<1%)          |
| KETOCONAZOLE                     | 0                           | 0                 | 0                           | 1 (<1%)                            | 1 (<1%)          |
| LYSOZYME                         | 0                           | 1 (1%)            | 0                           | 0                                  | 1 (<1%)          |
| METHENAMINE                      | 0                           | 1 (1%)            | 0                           | 0                                  | 1 (<1%)          |
| MOXIFLOXACIN                     | 1 (2%)                      | 0                 | 0                           | 0                                  | 1 (<1%)          |
| NEOMYCIN                         | 1 (2%)                      | 0                 | 0                           | 0                                  | 1 (<1%)          |
| POLYMYXIN B                      | 1 (2%)                      | 0                 | 0                           | 0                                  | 1 (<1%)          |
| TENOFOVIR DISOPROXIL<br>FUMARATE | 0                           | 0                 | 1 (<1%)                     | 0                                  | 1 (<1%)          |
| VALACICLOVIR HYDROCHLORIDE       | 0                           | 0                 | 0                           | 1 (<1%)                            | 1 (<1%)          |
| VARIOUS                          |                             |                   |                             |                                    |                  |
| Any medication                   | 1 (2%)                      | 6 (8%)            | 7 (5%)                      | 8 (6%)                             | 22 (5%)          |
| CHONDROITIN                      | 0                           | 1 (1%)            | 2 (1%)                      | 2 (1%)                             | 5 (1%)           |

Note: A medication may be included in more than one ATC Level category and appear more than once.  
 Note: The following ingredient terms, which do not have an associated ATC Level 1 term, were also taken during Run-in with the following frequencies: Bovine Prostate: SAL 50mcg-1 subject, <1%, Capsicum Annuum: SAL 50mcg-1 subject, <1%, Dextroamphetamine Saccharate: Placebo-1 subject, 1%, Lactoperoxidase: Placebo-1 subject, 1%, and Zinc Arginate: SAL 50mcg-1 subject, <1%.  
 dln73797: /arenv/arprod/ccil18781\_gr33343/asq112989/final/drivers/cm\_t004\_noncopddurri.sas 24AUG2010 15:26

123

1  
2  
3  
4  
5  
6  
7  
8  
9  
10  
11  
12  
13  
14  
15  
16  
17  
18  
19  
20  
21  
22  
23  
24  
25  
26  
27  
28  
29  
30  
31  
32  
33  
34  
35  
36  
37  
38  
39  
40  
41  
42  
43  
44  
45  
46  
47  
48  
49

Protocol: ASQ112989  
Population: Run-in

Page 22 of 23

Table 1.23  
Summary of Non-COPD Medications Taken During the Run-in

| ATC Level 1<br>Ingredient | Run-in<br>Failure<br>(N=52) | Placebo<br>(N=75) | SAL 50mcg<br>BID<br>(N=152) | FSC<br>250/50mcg<br>BID<br>(N=139) | Total<br>(N=418) |
|---------------------------|-----------------------------|-------------------|-----------------------------|------------------------------------|------------------|
| PLANTAGO OVATA            | 1 (2%)                      | 0                 | 1 (<1%)                     | 2 (1%)                             | 4 (<1%)          |
| AMBIGUOUS MEDICATION      | 0                           | 1 (1%)            | 2 (1%)                      | 0                                  | 3 (<1%)          |
| DIMETHYL SULFONE          | 0                           | 0                 | 2 (1%)                      | 1 (<1%)                            | 3 (<1%)          |
| ALLIUM SATIVUM            | 0                           | 0                 | 1 (<1%)                     | 1 (<1%)                            | 2 (<1%)          |
| CINNAMOMUM VERUM          | 0                           | 0                 | 0                           | 2 (1%)                             | 2 (<1%)          |
| HERBALS NOS               | 0                           | 0                 | 2 (1%)                      | 0                                  | 2 (<1%)          |
| MONASCUS PURPUREUS        | 0                           | 1 (1%)            | 0                           | 1 (<1%)                            | 2 (<1%)          |
| ACETYLCYSTEINE            | 0                           | 0                 | 1 (<1%)                     | 0                                  | 1 (<1%)          |
| ANTIOXIDANTS NOS          | 0                           | 0                 | 1 (<1%)                     | 0                                  | 1 (<1%)          |
| ECHINACEA                 | 0                           | 0                 | 0                           | 1 (<1%)                            | 1 (<1%)          |
| EUGENIA CARYOPHYLLATA     | 0                           | 0                 | 1 (<1%)                     | 0                                  | 1 (<1%)          |
| GLUCOSE OXIDASE           | 0                           | 1 (1%)            | 0                           | 0                                  | 1 (<1%)          |
| HERBAL EXTRACTS NOS       | 0                           | 0                 | 1 (<1%)                     | 0                                  | 1 (<1%)          |
| LACTOFERRIN               | 0                           | 1 (1%)            | 0                           | 0                                  | 1 (<1%)          |
| LINUM USITATISSIMUM OIL   | 0                           | 0                 | 0                           | 1 (<1%)                            | 1 (<1%)          |
| MEDICAGO SATIVA           | 0                           | 0                 | 1 (<1%)                     | 0                                  | 1 (<1%)          |
| METHIONINE                | 0                           | 0                 | 1 (<1%)                     | 0                                  | 1 (<1%)          |
| METHYLTHIONINIUM CHLORIDE | 0                           | 1 (1%)            | 0                           | 0                                  | 1 (<1%)          |
| NALOXONE HYDROCHLORIDE    | 0                           | 0                 | 0                           | 1 (<1%)                            | 1 (<1%)          |
| OENOTHERA BIENNIS OIL     | 0                           | 0                 | 0                           | 1 (<1%)                            | 1 (<1%)          |
| OXYGEN                    | 0                           | 0                 | 0                           | 1 (<1%)                            | 1 (<1%)          |
| PHYTOSTEROL (NOS)         | 0                           | 1 (1%)            | 0                           | 0                                  | 1 (<1%)          |
| SOYA LECITHIN             | 0                           | 0                 | 1 (<1%)                     | 0                                  | 1 (<1%)          |
| VITIS VINIFERA EXTRACT    | 0                           | 0                 | 0                           | 1 (<1%)                            | 1 (<1%)          |
| ZEA MAYS                  | 0                           | 0                 | 1 (<1%)                     | 0                                  | 1 (<1%)          |

Note: A medication may be included in more than one ATC Level category and appear more than once.

Note: The following ingredient terms, which do not have an associated ATC Level 1 term, were also taken during Run-in with the following frequencies: Bovine Prostate: SAL 50mcg-1 subject, <1%, Capsicum Annuum: SAL 50mcg-1 subject, <1%, Dextroamphetamine Saccharate: Placebo-1 subject, 1%, Lactoperoxidase: Placebo-1 subject, 1%, and Zinc Arginate: SAL 50mcg-1 subject, <1%.

dln73797: /arenv/arprod/ccil8781\_gr33343/asq112989/final/drivers/cm\_t004\_noncopddurri.sas 24AUG2010 15:26

124

CONFIDENTIAL

ASQ112989

Protocol: ASQ112989  
Population: Run-in

Page 23 of 23

Table 1.23  
Summary of Non-COPD Medications Taken During the Run-in

| ATC Level 1<br>Ingredient                              | Run-in<br>Failure<br>(N=52) | Placebo<br>(N=75) | SAL 50mcg<br>BID<br>(N=152) | FSC<br>250/50mcg<br>BID<br>(N=139) | Total<br>(N=418) |
|--------------------------------------------------------|-----------------------------|-------------------|-----------------------------|------------------------------------|------------------|
| ANTINEOPLASTIC AND<br>IMMUNOMODULATING AGENTS          |                             |                   |                             |                                    |                  |
| Any medication                                         | 2 (4%)                      | 2 (3%)            | 4 (3%)                      | 6 (4%)                             | 14 (3%)          |
| ESTRADIOL                                              | 1 (2%)                      | 1 (1%)            | 2 (1%)                      | 1 (<1%)                            | 5 (1%)           |
| ESTROGENS CONJUGATED                                   | 1 (2%)                      | 0                 | 0                           | 2 (1%)                             | 3 (<1%)          |
| TAMOXIFEN                                              | 0                           | 0                 | 1 (<1%)                     | 1 (<1%)                            | 2 (<1%)          |
| BEVACIZUMAB                                            | 0                           | 0                 | 0                           | 1 (<1%)                            | 1 (<1%)          |
| CICLOSPORIN                                            | 0                           | 0                 | 1 (<1%)                     | 0                                  | 1 (<1%)          |
| INTERFERON BETA                                        | 0                           | 0                 | 0                           | 1 (<1%)                            | 1 (<1%)          |
| MEDROXYPROGESTERONE ACETATE                            | 1 (2%)                      | 0                 | 0                           | 0                                  | 1 (<1%)          |
| RALOXIFENE HYDROCHLORIDE                               | 0                           | 1 (1%)            | 0                           | 0                                  | 1 (<1%)          |
| ANTIPARASITIC PRODUCTS,<br>INSECTICIDES AND REPELLENTS |                             |                   |                             |                                    |                  |
| Any medication                                         | 1 (2%)                      | 0                 | 1 (<1%)                     | 0                                  | 2 (<1%)          |
| METRONIDAZOLE                                          | 1 (2%)                      | 0                 | 1 (<1%)                     | 0                                  | 2 (<1%)          |

Note: A medication may be included in more than one ATC Level category and appear more than once.

Note: The following ingredient terms, which do not have an associated ATC Level 1 term, were also taken during Run-in with the following frequencies: Bovine Prostate: SAL 50mcg-1 subject, <1%, Capsicum Annuum: SAL 50mcg-1 subject, <1%, Dextroamphetamine Saccharate: Placebo-1 subject, 1%, Lactoperoxidase: Placebo-1 subject, 1%, and Zinc Arginate: SAL 50mcg-1 subject, <1%.

dln73797: /arenv/arprod/ccil8781\_gr33343/asq112989/final/drivers/cm\_t004\_noncopddurri.sas 24AUG2010 15:26

CONFIDENTIAL

ASQ112989

Protocol: ASQ112989  
Population: Modified Intent-to-treat

Page 1 of 24

Table 1.24  
Summary of Non-COPD Medications Taken During Treatment

| ATC Level 1<br>Ingredient | Placebo<br>(N=75) | SAL 50mcg<br>BID<br>(N=151) | FSC<br>250/50mcg<br>BID<br>(N=139) |
|---------------------------|-------------------|-----------------------------|------------------------------------|
| Any medication            | 63 (84%)          | 135 (89%)                   | 128 (92%)                          |
| NERVOUS SYSTEM            |                   |                             |                                    |
| Any medication            | 48 (64%)          | 103 (68%)                   | 101 (73%)                          |
| ACETYLSALICYLIC ACID      | 20 (27%)          | 50 (33%)                    | 50 (36%)                           |
| PARACETAMOL               | 11 (15%)          | 41 (27%)                    | 34 (24%)                           |
| IBUPROFEN                 | 9 (12%)           | 22 (15%)                    | 15 (11%)                           |
| ALPRAZOLAM                | 4 (5%)            | 8 (5%)                      | 10 (7%)                            |
| GABAPENTIN                | 2 (3%)            | 6 (4%)                      | 8 (6%)                             |
| HYDROCODONE               | 2 (3%)            | 7 (5%)                      | 3 (2%)                             |
| TRAZODONE                 | 2 (3%)            | 3 (2%)                      | 6 (4%)                             |
| CLONAZEPAM                | 1 (1%)            | 3 (2%)                      | 6 (4%)                             |
| CLONIDINE                 | 1 (1%)            | 4 (3%)                      | 5 (4%)                             |
| LORAZEPAM                 | 2 (3%)            | 2 (1%)                      | 4 (3%)                             |
| CAFFEINE                  | 0                 | 4 (3%)                      | 3 (2%)                             |
| DULOXETINE                | 3 (4%)            | 3 (2%)                      | 1 (<1%)                            |
| FLUOXETINE HYDROCHLORIDE  | 2 (3%)            | 2 (1%)                      | 3 (2%)                             |
| PAROXETINE HYDROCHLORIDE  | 1 (1%)            | 3 (2%)                      | 3 (2%)                             |
| SERTRALINE HYDROCHLORIDE  | 0                 | 3 (2%)                      | 4 (3%)                             |
| BUPROPION HYDROCHLORIDE   | 1 (1%)            | 2 (1%)                      | 3 (2%)                             |
| ESCITALOPRAM OXALATE      | 1 (1%)            | 2 (1%)                      | 3 (2%)                             |
| OXYCODONE HYDROCHLORIDE   | 1 (1%)            | 2 (1%)                      | 3 (2%)                             |
| TEMAZEPAM                 | 1 (1%)            | 4 (3%)                      | 1 (<1%)                            |
| CITALOPRAM HYDROBROMIDE   | 1 (1%)            | 2 (1%)                      | 2 (1%)                             |
| DIAZEPAM                  | 0                 | 4 (3%)                      | 1 (<1%)                            |
| ZOLPIDEM TARTRATE         | 1 (1%)            | 1 (<1%)                     | 3 (2%)                             |

Note: A medication may be included in more than one ATC Level category and appear more than once.

Note: The following ingredient terms, which do not have associated ATC Level 1 terms, were also used during Treatment with the following frequencies: Bovine Prostate: SAL 50mcg-1 subject, <1%, Capsicum Annuum: SAL 50mcg-1 subject, <1%, Dextroamphetamine Saccharate: Placebo-1 subject, 1%, Lactoperoxidase: Placebo-1 subject, 1%, and Zinc Arginate: SAL 50mcg-1 subject, <1%.

dln73797: /arenv/arprod/ccil18781\_gr33343/asq112989/final/drivers/cm\_t005\_noncopddur.sas 24AUG2010 15:59

126

CONFIDENTIAL

ASQ112989

Protocol: ASQ112989  
 Population: Modified Intent-to-treat

Page 2 of 24

Table 1.24  
 Summary of Non-COPD Medications Taken During Treatment

| ATC Level 1<br>Ingredient        | Placebo<br>(N=75) | SAL 50mcg<br>BID<br>(N=151) | FSC<br>250/50mcg<br>BID<br>(N=139) |
|----------------------------------|-------------------|-----------------------------|------------------------------------|
| BUPROPION                        | 2 (3%)            | 1 (<1%)                     | 1 (<1%)                            |
| CYCLOBENZAPRINE<br>HYDROCHLORIDE | 1 (1%)            | 0                           | 3 (2%)                             |
| PROMETHAZINE                     | 2 (3%)            | 2 (1%)                      | 0                                  |
| ROPINIROLE HYDROCHLORIDE         | 0                 | 1 (<1%)                     | 3 (2%)                             |
| TRAMADOL HYDROCHLORIDE           | 1 (1%)            | 1 (<1%)                     | 2 (1%)                             |
| VARENICLINE TARTRATE             | 2 (3%)            | 1 (<1%)                     | 1 (<1%)                            |
| VENLAFAXINE HYDROCHLORIDE        | 0                 | 3 (2%)                      | 1 (<1%)                            |
| AMITRIPTYLINE                    | 0                 | 2 (1%)                      | 1 (<1%)                            |
| AMITRIPTYLINE HYDROCHLORIDE      | 0                 | 1 (<1%)                     | 2 (1%)                             |
| ARIPIPIRAZOLE                    | 1 (1%)            | 1 (<1%)                     | 1 (<1%)                            |
| CITALOPRAM                       | 1 (1%)            | 1 (<1%)                     | 1 (<1%)                            |
| DEXTROPROPOXYPHENE NAPSILATE     | 0                 | 0                           | 3 (2%)                             |
| NICOTINE                         | 1 (1%)            | 1 (<1%)                     | 1 (<1%)                            |
| OLANZAPINE                       | 1 (1%)            | 1 (<1%)                     | 1 (<1%)                            |
| OXYCODONE                        | 0                 | 1 (<1%)                     | 2 (1%)                             |
| PAROXETINE                       | 0                 | 3 (2%)                      | 0                                  |
| PREGABALIN                       | 1 (1%)            | 0                           | 2 (1%)                             |
| SERTRALINE                       | 0                 | 0                           | 3 (2%)                             |
| BENZOCAINE                       | 0                 | 1 (<1%)                     | 1 (<1%)                            |
| CAPSAICIN                        | 0                 | 0                           | 2 (1%)                             |
| CLONIDINE HYDROCHLORIDE          | 0                 | 1 (<1%)                     | 1 (<1%)                            |
| CYCLOBENZAPRINE                  | 0                 | 1 (<1%)                     | 1 (<1%)                            |
| ESZOPICLONE                      | 1 (1%)            | 1 (<1%)                     | 0                                  |
| EXCEDRIN (NOS)                   | 1 (1%)            | 1 (<1%)                     | 0                                  |
| HYDROXYZINE                      | 0                 | 2 (1%)                      | 0                                  |

Note: A medication may be included in more than one ATC Level category and appear more than once.  
 Note: The following ingredient terms, which do not have associated ATC Level 1 terms, were also used during Treatment with the following frequencies: Bovine Prostate: SAL 50mcg-1 subject, <1%, Capsicum Annum: SAL 50mcg-1 subject, <1%, Dextroamphetamine Saccharate: Placebo-1 subject, 1%, Lactoperoxidase: Placebo-1 subject, 1%, and Zinc Arginate: SAL 50mcg-1 subject, <1%.  
 dln73797: /arenv/arprod/ccil18781\_gr33343/asq112989/final/drivers/cm\_t005\_noncopddur.sas 24AUG2010 15:59

127

CONFIDENTIAL

ASQ112989

Protocol: ASQ112989  
Population: Modified Intent-to-treat

Page 3 of 24

Table 1.24  
Summary of Non-COPD Medications Taken During Treatment

| ATC Level 1<br>Ingredient   | Placebo<br>(N=75) | SAL 50mcg<br>BID<br>(N=151) | FSC<br>250/50mcg<br>BID<br>(N=139) |
|-----------------------------|-------------------|-----------------------------|------------------------------------|
| HYDROXYZINE HYDROCHLORIDE   | 1 (1%)            | 1 (<1%)                     | 0                                  |
| LAMOTRIGINE                 | 0                 | 0                           | 2 (1%)                             |
| LIDOCAINE                   | 0                 | 2 (1%)                      | 0                                  |
| MIDAZOLAM                   | 0                 | 1 (<1%)                     | 1 (<1%)                            |
| MORPHINE                    | 0                 | 1 (<1%)                     | 1 (<1%)                            |
| NORTRIPTYLINE               | 1 (1%)            | 0                           | 1 (<1%)                            |
| QUETIAPINE FUMARATE         | 1 (1%)            | 0                           | 1 (<1%)                            |
| TRAMADOL                    | 1 (1%)            | 0                           | 1 (<1%)                            |
| AMFETAMINE ASPARTATE        | 1 (1%)            | 0                           | 0                                  |
| AMFETAMINE SULFATE          | 1 (1%)            | 0                           | 0                                  |
| BECLAMIDE                   | 0                 | 0                           | 1 (<1%)                            |
| BENZODIAZEPINE, NOS         | 0                 | 1 (<1%)                     | 0                                  |
| BETHANECHOL CHLORIDE        | 0                 | 1 (<1%)                     | 0                                  |
| BUPRENORPHINE HYDROCHLORIDE | 0                 | 0                           | 1 (<1%)                            |
| BUSPIRONE                   | 0                 | 1 (<1%)                     | 0                                  |
| BUSPIRONE HYDROCHLORIDE     | 0                 | 1 (<1%)                     | 0                                  |
| BUTALBITAL                  | 0                 | 0                           | 1 (<1%)                            |
| BUTYL AMINO BENZOATE        | 0                 | 0                           | 1 (<1%)                            |
| CARBAMAZEPINE               | 0                 | 0                           | 1 (<1%)                            |
| COCAINE                     | 0                 | 0                           | 1 (<1%)                            |
| CODEINE                     | 0                 | 0                           | 1 (<1%)                            |
| CODEINE PHOSPHATE           | 0                 | 1 (<1%)                     | 0                                  |
| CRACK COCAINE               | 0                 | 0                           | 1 (<1%)                            |
| DEXAMFETAMINE SULFATE       | 1 (1%)            | 0                           | 0                                  |
| DIPOTASSIUM CLORAZEPATE     | 0                 | 0                           | 1 (<1%)                            |
| FENTANYL                    | 0                 | 0                           | 1 (<1%)                            |

Note: A medication may be included in more than one ATC Level category and appear more than once.

Note: The following ingredient terms, which do not have associated ATC Level 1 terms, were also used during Treatment with the following frequencies: Bovine Prostate: SAL 50mcg-1 subject, <1%, Capsicum Annum: SAL 50mcg-1 subject, <1%, Dextroamphetamine Saccharate: Placebo-1 subject, 1%, Lactoperoxidase: Placebo-1 subject, 1%, and Zinc Arginate: SAL 50mcg-1 subject, <1%.

dln73797: /arenv/arprod/ccil8781\_gr33343/asq112989/final/drivers/cm\_t005\_noncopddur.sas 24AUG2010 15:59

128

CONFIDENTIAL

ASQ112989



Protocol: ASQ112989  
Population: Modified Intent-to-treat

Page 4 of 24

Table 1.24  
Summary of Non-COPD Medications Taken During Treatment

| ATC Level 1<br>Ingredient          | Placebo<br>(N=75) | SAL 50mcg<br>BID<br>(N=151) | FSC<br>250/50mcg<br>BID<br>(N=139) |
|------------------------------------|-------------------|-----------------------------|------------------------------------|
| FLUOXETINE                         | 1 (1%)            | 0                           | 0                                  |
| HYDROMORPHONE                      | 0                 | 1 (<1%)                     | 0                                  |
| KETOROLAC TROMETAMOL               | 1 (1%)            | 0                           | 0                                  |
| LIDOCAINE HYDROCHLORIDE            | 0                 | 1 (<1%)                     | 0                                  |
| METHYLPHENIDATE<br>HYDROCHLORIDE   | 0                 | 0                           | 1 (<1%)                            |
| MIRTAZAPINE                        | 0                 | 0                           | 1 (<1%)                            |
| PETHIDINE HYDROCHLORIDE            | 0                 | 1 (<1%)                     | 0                                  |
| PHENOBARBITAL                      | 0                 | 1 (<1%)                     | 0                                  |
| PHENYTOIN                          | 0                 | 1 (<1%)                     | 0                                  |
| PRAMIPEXOLE DIHYDROCHLORIDE        | 0                 | 0                           | 1 (<1%)                            |
| PROCHLORPERAZINE                   | 0                 | 0                           | 1 (<1%)                            |
| PROMETHAZINE HYDROCHLORIDE         | 0                 | 1 (<1%)                     | 0                                  |
| ROPINIROLE                         | 0                 | 0                           | 1 (<1%)                            |
| SULTOPRIDE                         | 1 (1%)            | 0                           | 0                                  |
| SUMATRIPTAN                        | 0                 | 1 (<1%)                     | 0                                  |
| SUMATRIPTAN SUCCINATE              | 1 (1%)            | 0                           | 0                                  |
| TETRACAINE HYDROCHLORIDE           | 0                 | 0                           | 1 (<1%)                            |
| TOMEXETINE HYDROCHLORIDE           | 0                 | 0                           | 1 (<1%)                            |
| TRAZODONE HYDROCHLORIDE            | 0                 | 1 (<1%)                     | 0                                  |
| VALPROIC ACID                      | 0                 | 0                           | 1 (<1%)                            |
| VENLAFAXINE                        | 1 (1%)            | 0                           | 0                                  |
| ZOLPIDEM                           | 1 (1%)            | 0                           | 0                                  |
| ALIMENTARY TRACT AND<br>METABOLISM |                   |                             |                                    |

Note: A medication may be included in more than one ATC Level category and appear more than once.  
Note: The following ingredient terms, which do not have associated ATC Level 1 terms, were also used during Treatment with the following frequencies: Bovine Prostate: SAL 50mcg-1 subject, <1%, Capsicum Annum: SAL 50mcg-1 subject, <1%, Dextroamphetamine Saccharate: Placebo-1 subject, 1%, Lactoperoxidase: Placebo-1 subject, 1%, and Zinc Arginate: SAL 50mcg-1 subject, <1%.  
dln73797: /arenv/arprod/ccil18781\_gr33343/asq112989/final/drivers/cm\_t005\_noncopddur.sas 24AUG2010 15:59

Protocol: ASQ112989  
Population: Modified Intent-to-treat

Page 5 of 24

Table 1.24  
Summary of Non-COPD Medications Taken During Treatment

| ATC Level 1<br>Ingredient | Placebo<br>(N=75) | SAL 50mcg<br>BID<br>(N=151) | FSC<br>250/50mcg<br>BID<br>(N=139) |
|---------------------------|-------------------|-----------------------------|------------------------------------|
| Any medication            | 43 (57%)          | 93 (62%)                    | 96 (69%)                           |
| ACETYLSALICYLIC ACID      | 20 (27%)          | 50 (33%)                    | 50 (36%)                           |
| VITAMINS NOS              | 11 (15%)          | 18 (12%)                    | 22 (16%)                           |
| OMEPRAZOLE                | 5 (7%)            | 20 (13%)                    | 17 (12%)                           |
| CALCIUM                   | 5 (7%)            | 8 (5%)                      | 13 (9%)                            |
| METFORMIN                 | 0                 | 7 (5%)                      | 10 (7%)                            |
| ASCORBIC ACID             | 3 (4%)            | 9 (6%)                      | 2 (1%)                             |
| POTASSIUM CHLORIDE        | 3 (4%)            | 6 (4%)                      | 5 (4%)                             |
| ERGOCALCIFEROL            | 2 (3%)            | 4 (3%)                      | 6 (4%)                             |
| ESOMEPRAZOLE MAGNESIUM    | 1 (1%)            | 5 (3%)                      | 6 (4%)                             |
| PANTOPRAZOLE              | 2 (3%)            | 3 (2%)                      | 7 (5%)                             |
| VITAMIN D NOS             | 3 (4%)            | 5 (3%)                      | 4 (3%)                             |
| METFORMIN HYDROCHLORIDE   | 2 (3%)            | 2 (1%)                      | 7 (5%)                             |
| MINERALS NOS              | 4 (5%)            | 3 (2%)                      | 4 (3%)                             |
| FAMOTIDINE                | 4 (5%)            | 1 (<1%)                     | 5 (4%)                             |
| RANITIDINE                | 3 (4%)            | 5 (3%)                      | 1 (<1%)                            |
| GLIPIZIDE                 | 1 (1%)            | 4 (3%)                      | 3 (2%)                             |
| RANITIDINE HYDROCHLORIDE  | 2 (3%)            | 4 (3%)                      | 2 (1%)                             |
| TOCOPHEROL                | 2 (3%)            | 4 (3%)                      | 2 (1%)                             |
| LANSOPRAZOLE              | 1 (1%)            | 4 (3%)                      | 2 (1%)                             |
| CALCIUM CARBONATE         | 2 (3%)            | 1 (<1%)                     | 3 (2%)                             |
| POTASSIUM NOS             | 1 (1%)            | 3 (2%)                      | 2 (1%)                             |
| GLIBENCLAMIDE             | 1 (1%)            | 3 (2%)                      | 1 (<1%)                            |
| GLIMEPIRIDE               | 0                 | 1 (<1%)                     | 3 (2%)                             |
| INSULIN ASPART            | 2 (3%)            | 2 (1%)                      | 0                                  |
| LOPERAMIDE HYDROCHLORIDE  | 1 (1%)            | 1 (<1%)                     | 2 (1%)                             |

Note: A medication may be included in more than one ATC Level category and appear more than once.

Note: The following ingredient terms, which do not have associated ATC Level 1 terms, were also used during Treatment with the following frequencies: Bovine Prostate: SAL 50mcg-1 subject, <1%, Capsicum Annum: SAL 50mcg-1 subject, <1%, Dextroamphetamine Saccharate: Placebo-1 subject, 1%, Lactoperoxidase: Placebo-1 subject, 1%, and Zinc Arginate: SAL 50mcg-1 subject, <1%.

dln73797: /arenv/arprod/ccil18781\_gr33343/asq112989/final/drivers/cm\_t005\_noncopddur.sas 24AUG2010 15:59

130

CONFIDENTIAL

ASQ112989

Protocol: ASQ112989  
Population: Modified Intent-to-treat

Page 6 of 24

Table 1.24  
Summary of Non-COPD Medications Taken During Treatment

| ATC Level 1<br>Ingredient            | Placebo<br>(N=75) | SAL 50mcg<br>BID<br>(N=151) | FSC<br>250/50mcg<br>BID<br>(N=139) |
|--------------------------------------|-------------------|-----------------------------|------------------------------------|
| PROMETHAZINE                         | 2 (3%)            | 2 (1%)                      | 0                                  |
| DEXLANSOPRAZOLE                      | 0                 | 2 (1%)                      | 1 (<1%)                            |
| INSULIN DETEMIR                      | 2 (3%)            | 1 (<1%)                     | 0                                  |
| INSULIN GLARGINE                     | 0                 | 1 (<1%)                     | 2 (1%)                             |
| PLANTAGO OVATA                       | 0                 | 1 (<1%)                     | 2 (1%)                             |
| PYRIDOXINE HYDROCHLORIDE             | 0                 | 2 (1%)                      | 1 (<1%)                            |
| SITAGLIPTIN                          | 0                 | 1 (<1%)                     | 2 (1%)                             |
| THIAMINE HYDROCHLORIDE               | 1 (1%)            | 1 (<1%)                     | 1 (<1%)                            |
| ZINC                                 | 1 (1%)            | 1 (<1%)                     | 1 (<1%)                            |
| BETACAROTENE                         | 0                 | 2 (1%)                      | 0                                  |
| CALCIUM CITRATE                      | 1 (1%)            | 0                           | 1 (<1%)                            |
| CINNAMOMUM VERUM                     | 0                 | 0                           | 2 (1%)                             |
| COLECALCIFEROL                       | 0                 | 0                           | 2 (1%)                             |
| COPPER                               | 0                 | 2 (1%)                      | 0                                  |
| HYDROCORTISONE                       | 0                 | 2 (1%)                      | 0                                  |
| HYOSCYAMINE SULFATE                  | 1 (1%)            | 1 (<1%)                     | 0                                  |
| INSULIN HUMAN INJECTION,<br>ISOPHANE | 1 (1%)            | 0                           | 1 (<1%)                            |
| LACTOBACILLUS ACIDOPHILUS            | 1 (1%)            | 1 (<1%)                     | 0                                  |
| MAGNESIUM OXIDE                      | 0                 | 2 (1%)                      | 0                                  |
| METOCLOPRAMIDE HYDROCHLORIDE         | 1 (1%)            | 1 (<1%)                     | 0                                  |
| METRONIDAZOLE                        | 1 (1%)            | 1 (<1%)                     | 0                                  |
| PIOGLITAZONE HYDROCHLORIDE           | 1 (1%)            | 0                           | 1 (<1%)                            |
| RABEPRAZOLE SODIUM                   | 0                 | 1 (<1%)                     | 1 (<1%)                            |
| RIBOFLAVIN                           | 0                 | 2 (1%)                      | 0                                  |
| SELENIUM                             | 0                 | 1 (<1%)                     | 1 (<1%)                            |

Note: A medication may be included in more than one ATC Level category and appear more than once.

Note: The following ingredient terms, which do not have associated ATC Level 1 terms, were also used during Treatment with the following frequencies: Bovine Prostate: SAL 50mcg-1 subject, <1%, Capsicum Annum: SAL 50mcg-1 subject, <1%, Dextroamphetamine Saccharate: Placebo-1 subject, 1%, Lactoperoxidase: Placebo-1 subject, 1%, and Zinc Arginate: SAL 50mcg-1 subject, <1%.

dln73797: /arenv/arprod/ccil18781\_gr33343/asq112989/final/drivers/cm\_t005\_noncopddur.sas 24AUG2010 15:59

131

CONFIDENTIAL

ASQ112989

Protocol: ASQ112989

Population: Modified Intent-to-treat

Page 7 of 24

Table 1.24  
Summary of Non-COPD Medications Taken During Treatment

| ATC Level 1<br>Ingredient             | Placebo<br>(N=75) | SAL 50mcg<br>BID<br>(N=151) | FSC<br>250/50mcg<br>BID<br>(N=139) |
|---------------------------------------|-------------------|-----------------------------|------------------------------------|
| SENNA                                 | 0                 | 0                           | 2 (1%)                             |
| SODIUM CHLORIDE                       | 1 (1%)            | 1 (<1%)                     | 0                                  |
| VITAMIN B SUBSTANCES NOS              | 0                 | 1 (<1%)                     | 1 (<1%)                            |
| ATROPINE SULFATE                      | 0                 | 1 (<1%)                     | 0                                  |
| BIFIDOBACTERIUM INFANTIS              | 0                 | 1 (<1%)                     | 0                                  |
| BIOTIN                                | 0                 | 0                           | 1 (<1%)                            |
| CHOLINE BITARTRATE                    | 0                 | 0                           | 1 (<1%)                            |
| CITRIC ACID                           | 0                 | 0                           | 1 (<1%)                            |
| CLOTRIMAZOLE                          | 0                 | 0                           | 1 (<1%)                            |
| DEXAMFETAMINE SULFATE                 | 1 (1%)            | 0                           | 0                                  |
| DICYCLOVERINE HYDROCHLORIDE           | 0                 | 0                           | 1 (<1%)                            |
| DIHYDROXYALUMINUM SODIUM<br>CARBONATE | 0                 | 1 (<1%)                     | 0                                  |
| DOCUSATE                              | 0                 | 0                           | 1 (<1%)                            |
| DOCUSATE SODIUM                       | 1 (1%)            | 0                           | 0                                  |
| DULCOLAX (NOS)                        | 1 (1%)            | 0                           | 0                                  |
| ESOMEPRAZOLE                          | 1 (1%)            | 0                           | 0                                  |
| HYDROCORTISONE VALERATE               | 0                 | 1 (<1%)                     | 0                                  |
| HYOSCINE HYDROBROMIDE                 | 0                 | 1 (<1%)                     | 0                                  |
| INSULIN HUMAN                         | 1 (1%)            | 0                           | 0                                  |
| INSULIN LISPRO                        | 0                 | 1 (<1%)                     | 0                                  |
| INSULIN NOS                           | 0                 | 1 (<1%)                     | 0                                  |
| ISOPHANE INSULIN                      | 0                 | 0                           | 1 (<1%)                            |
| LAXATIVES, NOS                        | 1 (1%)            | 0                           | 0                                  |
| MAGNESIUM                             | 0                 | 0                           | 1 (<1%)                            |
| MAGNESIUM GLUCONATE                   | 0                 | 0                           | 1 (<1%)                            |

Note: A medication may be included in more than one ATC Level category and appear more than once.

Note: The following ingredient terms, which do not have associated ATC Level 1 terms, were also used during Treatment with the following frequencies: Bovine Prostate: SAL 50mcg-1 subject, <1%, Capsicum Annum: SAL 50mcg-1 subject, <1%, Dextroamphetamine Saccharate: Placebo-1 subject, 1%, Lactoperoxidase: Placebo-1 subject, 1%, and Zinc Arginate: SAL 50mcg-1 subject, <1%.

dln73797: /arenv/arprod/ccil8781\_gr33343/asq112989/final/drivers/cm\_t005\_noncopddur.sas 24AUG2010 15:59

132

CONFIDENTIAL

ASQ112989

Protocol: ASQ112989  
Population: Modified Intent-to-treat

Page 8 of 24

Table 1.24  
Summary of Non-COPD Medications Taken During Treatment

| ATC Level 1<br>Ingredient  | Placebo<br>(N=75) | SAL 50mcg<br>BID<br>(N=151) | FSC<br>250/50mcg<br>BID<br>(N=139) |
|----------------------------|-------------------|-----------------------------|------------------------------------|
| MAGNESIUM HYDROXIDE        | 0                 | 1 (<1%)                     | 0                                  |
| MECLOZINE                  | 0                 | 1 (<1%)                     | 0                                  |
| ONDANSETRON                | 0                 | 1 (<1%)                     | 0                                  |
| PANTOTHENIC ACID           | 0                 | 1 (<1%)                     | 0                                  |
| POTASSIUM GLUCONATE        | 0                 | 1 (<1%)                     | 0                                  |
| PREDNISON                  | 0                 | 0                           | 1 (<1%)                            |
| PROCHLORPERAZINE           | 0                 | 0                           | 1 (<1%)                            |
| PROMETHAZINE HYDROCHLORIDE | 0                 | 1 (<1%)                     | 0                                  |
| PYRIDOXINE                 | 0                 | 1 (<1%)                     | 0                                  |
| REPAGLINIDE                | 0                 | 0                           | 1 (<1%)                            |
| RETINOL                    | 0                 | 1 (<1%)                     | 0                                  |
| ROSIGLITAZONE              | 0                 | 0                           | 1 (<1%)                            |
| SILYBUM MARIANUM           | 0                 | 0                           | 1 (<1%)                            |
| SODIUM BICARBONATE         | 0                 | 0                           | 1 (<1%)                            |
| SUCRALFATE                 | 0                 | 0                           | 1 (<1%)                            |
| TETRACYCLINE               | 1 (1%)            | 0                           | 0                                  |
| VANCOMYCIN                 | 0                 | 0                           | 1 (<1%)                            |
| VITAMIN B NOS              | 0                 | 1 (<1%)                     | 0                                  |
| ZEA MAYS                   | 0                 | 1 (<1%)                     | 0                                  |
| CARDIOVASCULAR SYSTEM      |                   |                             |                                    |
| Any medication             | 49 (65%)          | 94 (62%)                    | 88 (63%)                           |
| LISINAPRIL                 | 13 (17%)          | 24 (16%)                    | 29 (21%)                           |
| HYDROCHLOROTHIAZIDE        | 7 (9%)            | 24 (16%)                    | 23 (17%)                           |
| SIMVASTATIN                | 13 (17%)          | 22 (15%)                    | 14 (10%)                           |
| AMLODIPINE BESILATE        | 4 (5%)            | 10 (7%)                     | 9 (6%)                             |

Note: A medication may be included in more than one ATC Level category and appear more than once.  
Note: The following ingredient terms, which do not have associated ATC Level 1 terms, were also used during Treatment with the following frequencies: Bovine Prostate: SAL 50mcg-1 subject, <1%, Capsicum Annum: SAL 50mcg-1 subject, <1%, Dextroamphetamine Saccharate: Placebo-1 subject, 1%, Lactoperoxidase: Placebo-1 subject, 1%, and Zinc Arginate: SAL 50mcg-1 subject, <1%.  
dln73797: /arenv/arprod/ccil18781\_gr33343/asq112989/final/drivers/cm\_t005\_noncopddur.sas 24AUG2010 15:59

Protocol: ASQ112989  
Population: Modified Intent-to-treat

Page 9 of 24

Table 1.24  
Summary of Non-COPD Medications Taken During Treatment

| ATC Level 1<br>Ingredient    | Placebo<br>(N=75) | SAL 50mcg<br>BID<br>(N=151) | FSC<br>250/50mcg<br>BID<br>(N=139) |
|------------------------------|-------------------|-----------------------------|------------------------------------|
| AMLODIPINE                   | 4 (5%)            | 10 (7%)                     | 7 (5%)                             |
| ATORVASTATIN CALCIUM         | 2 (3%)            | 9 (6%)                      | 9 (6%)                             |
| ATENOLOL                     | 6 (8%)            | 8 (5%)                      | 4 (3%)                             |
| METOPROLOL                   | 3 (4%)            | 10 (7%)                     | 5 (4%)                             |
| CARVEDILOL                   | 2 (3%)            | 5 (3%)                      | 10 (7%)                            |
| FISH OIL                     | 3 (4%)            | 7 (5%)                      | 7 (5%)                             |
| FUROSEMIDE                   | 4 (5%)            | 8 (5%)                      | 5 (4%)                             |
| VALSARTAN                    | 1 (1%)            | 8 (5%)                      | 7 (5%)                             |
| PRAVASTATIN                  | 5 (7%)            | 6 (4%)                      | 4 (3%)                             |
| OLMESARTAN                   | 2 (3%)            | 9 (6%)                      | 1 (<1%)                            |
| CLONIDINE                    | 1 (1%)            | 4 (3%)                      | 5 (4%)                             |
| LOVASTATIN                   | 2 (3%)            | 2 (1%)                      | 6 (4%)                             |
| ROSUVASTATIN CALCIUM         | 1 (1%)            | 4 (3%)                      | 5 (4%)                             |
| FENOFIBRATE                  | 0                 | 4 (3%)                      | 4 (3%)                             |
| GLYCERYL TRINITRATE          | 1 (1%)            | 6 (4%)                      | 1 (<1%)                            |
| EZETIMIBE                    | 2 (3%)            | 4 (3%)                      | 1 (<1%)                            |
| TRIAMTERENE                  | 2 (3%)            | 2 (1%)                      | 3 (2%)                             |
| DIGOXIN                      | 1 (1%)            | 4 (3%)                      | 1 (<1%)                            |
| GEMFIBROZIL                  | 1 (1%)            | 2 (1%)                      | 3 (2%)                             |
| OMEGA-3 MARINE TRIGLYCERIDES | 3 (4%)            | 2 (1%)                      | 1 (<1%)                            |
| ENALAPRIL                    | 0                 | 2 (1%)                      | 3 (2%)                             |
| NICOTINIC ACID               | 0                 | 2 (1%)                      | 3 (2%)                             |
| UBIDECARENONE                | 1 (1%)            | 2 (1%)                      | 2 (1%)                             |
| BENAZEPRIL                   | 0                 | 3 (2%)                      | 1 (<1%)                            |
| DILTIAZEM                    | 0                 | 4 (3%)                      | 0                                  |
| DILTIAZEM HYDROCHLORIDE      | 0                 | 0                           | 4 (3%)                             |

Note: A medication may be included in more than one ATC Level category and appear more than once.

Note: The following ingredient terms, which do not have associated ATC Level 1 terms, were also used during Treatment with the following frequencies: Bovine Prostate: SAL 50mcg-1 subject, <1%, Capsicum Annum: SAL 50mcg-1 subject, <1%, Dextroamphetamine Saccharate: Placebo-1 subject, 1%, Lactoperoxidase: Placebo-1 subject, 1%, and Zinc Arginate: SAL 50mcg-1 subject, <1%.

dln73797: /arenv/arprod/ccil18781\_gr33343/asq112989/final/drivers/cm\_t005\_noncopddur.sas 24AUG2010 15:59

134

CONFIDENTIAL

ASQ112989

Protocol: ASQ112989  
 Population: Modified Intent-to-treat

Page 10 of 24

Table 1.24  
 Summary of Non-COPD Medications Taken During Treatment

| ATC Level 1<br>Ingredient   | Placebo<br>(N=75) | SAL 50mcg<br>BID<br>(N=151) | FSC<br>250/50mcg<br>BID<br>(N=139) |
|-----------------------------|-------------------|-----------------------------|------------------------------------|
| IRBESARTAN                  | 0                 | 3 (2%)                      | 1 (<1%)                            |
| METOPROLOL SUCCINATE        | 2 (3%)            | 0                           | 2 (1%)                             |
| METOPROLOL TARTRATE         | 0                 | 0                           | 4 (3%)                             |
| NEBIVOLOL HYDROCHLORIDE     | 1 (1%)            | 1 (<1%)                     | 2 (1%)                             |
| TERAZOSIN                   | 2 (3%)            | 1 (<1%)                     | 1 (<1%)                            |
| VERAPAMIL                   | 0                 | 4 (3%)                      | 0                                  |
| DOXAZOSIN MESILATE          | 2 (3%)            | 0                           | 1 (<1%)                            |
| LOSARTAN POTASSIUM          | 1 (1%)            | 0                           | 2 (1%)                             |
| NIFEDIPINE                  | 0                 | 1 (<1%)                     | 2 (1%)                             |
| PHENYLEPHRINE HYDROCHLORIDE | 1 (1%)            | 0                           | 2 (1%)                             |
| TORASEMIDE                  | 0                 | 2 (1%)                      | 1 (<1%)                            |
| BENZAPEPRIL HYDROCHLORIDE   | 0                 | 1 (<1%)                     | 1 (<1%)                            |
| BENZOCAINE                  | 0                 | 1 (<1%)                     | 1 (<1%)                            |
| CLONIDINE HYDROCHLORIDE     | 0                 | 1 (<1%)                     | 1 (<1%)                            |
| HYDROCORTISONE              | 0                 | 2 (1%)                      | 0                                  |
| LIDOCAINE                   | 0                 | 2 (1%)                      | 0                                  |
| METOLAZONE                  | 0                 | 2 (1%)                      | 0                                  |
| MONASCUS PURPUREUS          | 1 (1%)            | 0                           | 1 (<1%)                            |
| NADOLOL                     | 1 (1%)            | 0                           | 1 (<1%)                            |
| PENTOXIFYLLINE              | 2 (3%)            | 0                           | 0                                  |
| PRAVASTATIN SODIUM          | 0                 | 2 (1%)                      | 0                                  |
| QUINAPRIL                   | 1 (1%)            | 0                           | 1 (<1%)                            |
| TADALAFIL                   | 1 (1%)            | 0                           | 1 (<1%)                            |
| TERAZOSIN HYDROCHLORIDE     | 1 (1%)            | 0                           | 1 (<1%)                            |
| ALDACTONE (NOS)             | 0                 | 1 (<1%)                     | 0                                  |
| AMIODARONE                  | 0                 | 1 (<1%)                     | 0                                  |

Note: A medication may be included in more than one ATC Level category and appear more than once.  
 Note: The following ingredient terms, which do not have associated ATC Level 1 terms, were also used during Treatment with the following frequencies: Bovine Prostate: SAL 50mcg-1 subject, <1%, Capsicum Annum: SAL 50mcg-1 subject, <1%, Dextroamphetamine Saccharate: Placebo-1 subject, 1%, Lactoperoxidase: Placebo-1 subject, 1%, and Zinc Arginate: SAL 50mcg-1 subject, <1%.  
 dln73797: /arenv/arprod/ccil18781\_gr33343/asq112989/final/drivers/cm\_t005\_noncopddur.sas 24AUG2010 15:59

135

CONFIDENTIAL

ASQ112989

Protocol: ASQ112989

Page 11 of 24

Population: Modified Intent-to-treat

Table 1.24  
Summary of Non-COPD Medications Taken During Treatment

| ATC Level 1<br>Ingredient | Placebo<br>(N=75) | SAL 50mcg<br>BID<br>(N=151) | FSC<br>250/50mcg<br>BID<br>(N=139) |
|---------------------------|-------------------|-----------------------------|------------------------------------|
| BISOPROLOL FUMARATE       | 0                 | 0                           | 1 (<1%)                            |
| BUMETANIDE                | 1 (1%)            | 0                           | 0                                  |
| DOFETILIDE                | 0                 | 0                           | 1 (<1%)                            |
| DOXAZOSIN                 | 1 (1%)            | 0                           | 0                                  |
| DRONEDARONE               | 0                 | 1 (<1%)                     | 0                                  |
| ENALAPRIL MALEATE         | 1 (1%)            | 0                           | 0                                  |
| FELODIPINE                | 0                 | 0                           | 1 (<1%)                            |
| FLUVASTATIN SODIUM        | 0                 | 1 (<1%)                     | 0                                  |
| HYDRALAZINE               | 0                 | 1 (<1%)                     | 0                                  |
| HYDRALAZINE HYDROCHLORIDE | 0                 | 0                           | 1 (<1%)                            |
| INDAPAMIDE                | 0                 | 0                           | 1 (<1%)                            |
| INDOMETACIN               | 0                 | 0                           | 1 (<1%)                            |
| ISOSORBIDE                | 1 (1%)            | 0                           | 0                                  |
| ISOSORBIDE MONONITRATE    | 0                 | 1 (<1%)                     | 0                                  |
| LIDOCAINE HYDROCHLORIDE   | 0                 | 1 (<1%)                     | 0                                  |
| MOEXIPRIL HYDROCHLORIDE   | 0                 | 0                           | 1 (<1%)                            |
| NEBIVOLOL                 | 0                 | 1 (<1%)                     | 0                                  |
| PETROSELINUM CRISPUM      | 0                 | 1 (<1%)                     | 0                                  |
| PHENYLEPHRINE             | 0                 | 0                           | 1 (<1%)                            |
| PHYTOSTEROL (NOS)         | 1 (1%)            | 0                           | 0                                  |
| QUINAPRIL HYDROCHLORIDE   | 1 (1%)            | 0                           | 0                                  |
| ROSUVASTATIN              | 1 (1%)            | 0                           | 0                                  |
| SILODOSIN                 | 1 (1%)            | 0                           | 0                                  |
| SPIRONOLACTONE            | 1 (1%)            | 0                           | 0                                  |
| TELMISARTAN               | 0                 | 0                           | 1 (<1%)                            |
| TETRACAINE HYDROCHLORIDE  | 0                 | 0                           | 1 (<1%)                            |

Note: A medication may be included in more than one ATC Level category and appear more than once.

Note: The following ingredient terms, which do not have associated ATC Level 1 terms, were also used during Treatment with the following frequencies: Bovine Prostate: SAL 50mcg-1 subject, <1%, Capsicum Annum: SAL 50mcg-1 subject, <1%, Dextroamphetamine Saccharate: Placebo-1 subject, 1%, Lactoperoxidase: Placebo-1 subject, 1%, and Zinc Arginate: SAL 50mcg-1 subject, <1%.

dln73797: /arenv/arprod/ccil18781\_gr33343/asq112989/final/drivers/cm\_t005\_noncopddur.sas 24AUG2010 15:59

136

CONFIDENTIAL

ASQ112989



Protocol: ASQ112989  
 Population: Modified Intent-to-treat

Page 12 of 24

Table 1.24  
 Summary of Non-COPD Medications Taken During Treatment

| ATC Level 1<br>Ingredient        | Placebo<br>(N=75) | SAL 50mcg<br>BID<br>(N=151) | FSC<br>250/50mcg<br>BID<br>(N=139) |
|----------------------------------|-------------------|-----------------------------|------------------------------------|
| TIMOLOL                          | 0                 | 1 (<1%)                     | 0                                  |
| TIMOLOL MALEATE                  | 1 (1%)            | 0                           | 0                                  |
| TRANDOLAPRIL                     | 0                 | 1 (<1%)                     | 0                                  |
| <b>MUSCULO-SKELETAL SYSTEM</b>   |                   |                             |                                    |
| Any medication                   | 47 (63%)          | 76 (50%)                    | 77 (55%)                           |
| ACETYLSALICYLIC ACID             | 20 (27%)          | 50 (33%)                    | 50 (36%)                           |
| IBUPROFEN                        | 9 (12%)           | 22 (15%)                    | 15 (11%)                           |
| NAPROXEN SODIUM                  | 7 (9%)            | 5 (3%)                      | 6 (4%)                             |
| NAPROXEN                         | 4 (5%)            | 4 (3%)                      | 5 (4%)                             |
| ALENDRONATE SODIUM               | 4 (5%)            | 4 (3%)                      | 3 (2%)                             |
| MELOXICAM                        | 6 (8%)            | 1 (<1%)                     | 3 (2%)                             |
| CHONDROITIN                      | 1 (1%)            | 2 (1%)                      | 2 (1%)                             |
| ALLOPURINOL                      | 0                 | 3 (2%)                      | 1 (<1%)                            |
| CARISOPRODOL                     | 1 (1%)            | 1 (<1%)                     | 2 (1%)                             |
| CELECOXIB                        | 1 (1%)            | 1 (<1%)                     | 2 (1%)                             |
| CYCLOBENZAPRINE<br>HYDROCHLORIDE | 1 (1%)            | 0                           | 3 (2%)                             |
| GLUCOSAMINE                      | 1 (1%)            | 2 (1%)                      | 1 (<1%)                            |
| COLCHICINE                       | 1 (1%)            | 1 (<1%)                     | 1 (<1%)                            |
| DIMETHYL SULFONE                 | 0                 | 2 (1%)                      | 1 (<1%)                            |
| RISEDRONATE SODIUM               | 0                 | 0                           | 3 (2%)                             |
| ALENDRONIC ACID                  | 1 (1%)            | 0                           | 1 (<1%)                            |
| CAPSAICIN                        | 0                 | 0                           | 2 (1%)                             |
| CYCLOBENZAPRINE                  | 0                 | 1 (<1%)                     | 1 (<1%)                            |
| DICLOFENAC                       | 1 (1%)            | 1 (<1%)                     | 0                                  |

Note: A medication may be included in more than one ATC Level category and appear more than once.  
 Note: The following ingredient terms, which do not have associated ATC Level 1 terms, were also used during Treatment with the following frequencies: Bovine Prostate: SAL 50mcg-1 subject, <1%, Capsicum Annum: SAL 50mcg-1 subject, <1%, Dextroamphetamine Saccharate: Placebo-1 subject, 1%, Lactoperoxidase: Placebo-1 subject, 1%, and Zinc Arginate: SAL 50mcg-1 subject, <1%.  
 dln73797: /arenv/arprod/ccil18781\_gr33343/asq112989/final/drivers/cm\_t005\_noncopddur.sas 24AUG2010 15:59

137

CONFIDENTIAL

ASQ112989

Protocol: ASQ112989  
Population: Modified Intent-to-treat

Page 13 of 24

Table 1.24  
Summary of Non-COPD Medications Taken During Treatment

| ATC Level 1<br>Ingredient      | Placebo<br>(N=75) | SAL 50mcg<br>BID<br>(N=151) | FSC<br>250/50mcg<br>BID<br>(N=139) |
|--------------------------------|-------------------|-----------------------------|------------------------------------|
| GLUCOSAMINE SULFATE            | 0                 | 1 (<1%)                     | 1 (<1%)                            |
| NABUMETONE                     | 0                 | 1 (<1%)                     | 1 (<1%)                            |
| SODIUM IBANDRONATE             | 0                 | 1 (<1%)                     | 1 (<1%)                            |
| BACLOFEN                       | 0                 | 0                           | 1 (<1%)                            |
| DICLOFENAC SODIUM              | 0                 | 1 (<1%)                     | 0                                  |
| DICLOFENAC                     | 1 (1%)            | 0                           | 0                                  |
| HYDROXYETHYLPYRROLIDINE        |                   |                             |                                    |
| FEBUXOSTAT                     | 0                 | 0                           | 1 (<1%)                            |
| GLUCOSAMINE HYDROCHLORIDE      | 0                 | 1 (<1%)                     | 0                                  |
| HYALURONIC ACID                | 1 (1%)            | 0                           | 0                                  |
| INDOMETACIN                    | 0                 | 0                           | 1 (<1%)                            |
| KETOROLAC TROMETAMOL           | 1 (1%)            | 0                           | 0                                  |
| METAXALONE                     | 1 (1%)            | 0                           | 0                                  |
| PIROXICAM                      | 0                 | 1 (<1%)                     | 0                                  |
| TIZANIDINE HYDROCHLORIDE       | 0                 | 0                           | 1 (<1%)                            |
| ZOLEDRONIC ACID                | 0                 | 0                           | 1 (<1%)                            |
| BLOOD AND BLOOD FORMING ORGANS |                   |                             |                                    |
| Any medication                 | 27 (36%)          | 62 (41%)                    | 63 (45%)                           |
| ACETYLSALICYLIC ACID           | 20 (27%)          | 50 (33%)                    | 50 (36%)                           |
| CLOPIDOGREL BISULFATE          | 3 (4%)            | 9 (6%)                      | 6 (4%)                             |
| CYANOCOBALAMIN                 | 3 (4%)            | 8 (5%)                      | 5 (4%)                             |
| POTASSIUM CHLORIDE             | 3 (4%)            | 6 (4%)                      | 5 (4%)                             |
| FOLIC ACID                     | 1 (1%)            | 3 (2%)                      | 2 (1%)                             |
| POTASSIUM NOS                  | 1 (1%)            | 3 (2%)                      | 2 (1%)                             |
| FERROUS SULPHATE               | 1 (1%)            | 0                           | 4 (3%)                             |

Note: A medication may be included in more than one ATC Level category and appear more than once.

Note: The following ingredient terms, which do not have associated ATC Level 1 terms, were also used during Treatment with the following frequencies: Bovine Prostate: SAL 50mcg-1 subject, <1%, Capsicum Annum: SAL 50mcg-1 subject, <1%, Dextroamphetamine Saccharate: Placebo-1 subject, 1%, Lactoperoxidase: Placebo-1 subject, 1%, and Zinc Arginate: SAL 50mcg-1 subject, <1%.

dln73797: /arenv/arprod/ccil18781\_gr33343/asq112989/final/drivers/cm\_t005\_noncopddur.sas 24AUG2010 15:59

138

CONFIDENTIAL

ASQ112989

Protocol: ASQ112989  
 Population: Modified Intent-to-treat

Page 14 of 24

Table 1.24  
 Summary of Non-COPD Medications Taken During Treatment

| ATC Level 1<br>Ingredient              | Placebo<br>(N=75) | SAL 50mcg<br>BID<br>(N=151) | FSC<br>250/50mcg<br>BID<br>(N=139) |
|----------------------------------------|-------------------|-----------------------------|------------------------------------|
| DIPYRIDAMOLE                           | 2 (3%)            | 2 (1%)                      | 0                                  |
| WARFARIN SODIUM                        | 0                 | 2 (1%)                      | 2 (1%)                             |
| ENOXAPARIN SODIUM                      | 1 (1%)            | 2 (1%)                      | 0                                  |
| WARFARIN                               | 0                 | 2 (1%)                      | 1 (<1%)                            |
| SODIUM CHLORIDE                        | 1 (1%)            | 1 (<1%)                     | 0                                  |
| CILOSTAZOL                             | 0                 | 0                           | 1 (<1%)                            |
| FERROUS GLUCONATE                      | 0                 | 0                           | 1 (<1%)                            |
| GLUCOSE OXIDASE                        | 1 (1%)            | 0                           | 0                                  |
| IRON                                   | 0                 | 1 (<1%)                     | 0                                  |
| SODIUM BICARBONATE                     | 0                 | 0                           | 1 (<1%)                            |
| GENITO URINARY SYSTEM AND SEX HORMONES |                   |                             |                                    |
| Any medication                         | 25 (33%)          | 41 (27%)                    | 40 (29%)                           |
| IBUPROFEN                              | 9 (12%)           | 22 (15%)                    | 15 (11%)                           |
| NAPROXEN SODIUM                        | 7 (9%)            | 5 (3%)                      | 6 (4%)                             |
| NAPROXEN                               | 4 (5%)            | 4 (3%)                      | 5 (4%)                             |
| TAMSULOSIN HYDROCHLORIDE               | 1 (1%)            | 1 (<1%)                     | 3 (2%)                             |
| ESTRADIOL                              | 1 (1%)            | 2 (1%)                      | 1 (<1%)                            |
| TERAZOSIN                              | 2 (3%)            | 1 (<1%)                     | 1 (<1%)                            |
| DIMETHYL SULFONE                       | 0                 | 2 (1%)                      | 1 (<1%)                            |
| DOXAZOSIN MESILATE                     | 2 (3%)            | 0                           | 1 (<1%)                            |
| DUTASTERIDE                            | 0                 | 1 (<1%)                     | 2 (1%)                             |
| FINASTERIDE                            | 2 (3%)            | 1 (<1%)                     | 0                                  |
| SERENOA REPENS                         | 0                 | 1 (<1%)                     | 2 (1%)                             |
| TOLTERODINE TARTRATE                   | 0                 | 2 (1%)                      | 1 (<1%)                            |

Note: A medication may be included in more than one ATC Level category and appear more than once.  
 Note: The following ingredient terms, which do not have associated ATC Level 1 terms, were also used during Treatment with the following frequencies: Bovine Prostate: SAL 50mcg-1 subject, <1%, Capsicum Annum: SAL 50mcg-1 subject, <1%, Dextroamphetamine Saccharate: Placebo-1 subject, 1%, Lactoperoxidase: Placebo-1 subject, 1%, and Zinc Arginate: SAL 50mcg-1 subject, <1%.  
 dln73797: /arenv/arprod/ccil18781\_gr33343/asq112989/final/drivers/cm\_t005\_noncopddur.sas 24AUG2010 15:59

139

CONFIDENTIAL

ASQ112989

Protocol: ASQ112989  
Population: Modified Intent-to-treat

Page 15 of 24

Table 1.24  
Summary of Non-COPD Medications Taken During Treatment

| ATC Level 1<br>Ingredient        | Placebo<br>(N=75) | SAL 50mcg<br>BID<br>(N=151) | FSC<br>250/50mcg<br>BID<br>(N=139) |
|----------------------------------|-------------------|-----------------------------|------------------------------------|
| ALFUZOSIN HYDROCHLORIDE          | 0                 | 1 (<1%)                     | 1 (<1%)                            |
| COPPER                           | 0                 | 2 (1%)                      | 0                                  |
| ESTROGENS CONJUGATED             | 0                 | 0                           | 2 (1%)                             |
| METRONIDAZOLE                    | 1 (1%)            | 1 (<1%)                     | 0                                  |
| OXYBUTYNIN HYDROCHLORIDE         | 0                 | 0                           | 2 (1%)                             |
| SILDENAFIL CITRATE               | 0                 | 2 (1%)                      | 0                                  |
| TADALAFIL                        | 1 (1%)            | 0                           | 1 (<1%)                            |
| TERAZOSIN HYDROCHLORIDE          | 1 (1%)            | 0                           | 1 (<1%)                            |
| CLINDAMYCIN                      | 0                 | 1 (<1%)                     | 0                                  |
| CLOTRIMAZOLE                     | 0                 | 0                           | 1 (<1%)                            |
| DOXAZOSIN                        | 1 (1%)            | 0                           | 0                                  |
| KETOCONAZOLE                     | 0                 | 0                           | 1 (<1%)                            |
| MAGNESIUM HYDROXIDE              | 0                 | 1 (<1%)                     | 0                                  |
| METHYLTHIONINIUM CHLORIDE        | 1 (1%)            | 0                           | 0                                  |
| NORETHISTERONE ACETATE           | 0                 | 0                           | 1 (<1%)                            |
| PHENAZOPYRIDINE<br>HYDROCHLORIDE | 0                 | 1 (<1%)                     | 0                                  |
| PHENYL SALICYLATE                | 1 (1%)            | 0                           | 0                                  |
| RALOXIFENE HYDROCHLORIDE         | 1 (1%)            | 0                           | 0                                  |
| SILODOSIN                        | 1 (1%)            | 0                           | 0                                  |
| SODIUM PHOSPHATE MONOBASIC       | 1 (1%)            | 0                           | 0                                  |
| SOLIFENACIN SUCCINATE            | 0                 | 1 (<1%)                     | 0                                  |
| TAMSULOSIN                       | 1 (1%)            | 0                           | 0                                  |
| VARDENAFIL                       | 0                 | 0                           | 1 (<1%)                            |

## RESPIRATORY SYSTEM

Note: A medication may be included in more than one ATC Level category and appear more than once.  
Note: The following ingredient terms, which do not have associated ATC Level 1 terms, were also used during Treatment with the following frequencies: Bovine Prostate: SAL 50mcg-1 subject, <1%, Capsicum Annum: SAL 50mcg-1 subject, <1%, Dextroamphetamine Saccharate: Placebo-1 subject, 1%, Lactoperoxidase: Placebo-1 subject, 1%, and Zinc Arginate: SAL 50mcg-1 subject, <1%.  
dln73797: /arenv/arprod/ccil8781\_gr33343/asq112989/final/drivers/cm\_t005\_noncopddur.sas 24AUG2010 15:59

Protocol: ASQ112989

Page 16 of 24

Population: Modified Intent-to-treat

Table 1.24  
Summary of Non-COPD Medications Taken During Treatment

| ATC Level 1<br>Ingredient        | Placebo<br>(N=75) | SAL 50mcg<br>BID<br>(N=151) | FSC<br>250/50mcg<br>BID<br>(N=139) |
|----------------------------------|-------------------|-----------------------------|------------------------------------|
| Any medication                   | 13 (17%)          | 47 (31%)                    | 34 (24%)                           |
| HYDROCODONE BITARTRATE           | 3 (4%)            | 17 (11%)                    | 12 (9%)                            |
| HYDROCODONE                      | 2 (3%)            | 7 (5%)                      | 3 (2%)                             |
| GUAIFENESIN                      | 1 (1%)            | 2 (1%)                      | 4 (3%)                             |
| BENADRYL (NOS)                   | 0                 | 2 (1%)                      | 3 (2%)                             |
| LORATADINE                       | 1 (1%)            | 3 (2%)                      | 1 (<1%)                            |
| DIPHENHYDRAMINE                  | 1 (1%)            | 1 (<1%)                     | 2 (1%)                             |
| PROMETHAZINE                     | 2 (3%)            | 2 (1%)                      | 0                                  |
| CETIRIZINE                       | 0                 | 1 (<1%)                     | 2 (1%)                             |
| CETIRIZINE HYDROCHLORIDE         | 1 (1%)            | 1 (<1%)                     | 1 (<1%)                            |
| DIPHENHYDRAMINE<br>HYDROCHLORIDE | 0                 | 3 (2%)                      | 0                                  |
| OXYGEN                           | 0                 | 1 (<1%)                     | 2 (1%)                             |
| PHENYLEPHRINE HYDROCHLORIDE      | 1 (1%)            | 0                           | 2 (1%)                             |
| BENZOCAINE                       | 0                 | 1 (<1%)                     | 1 (<1%)                            |
| CHLORPHENAMINE MALEATE           | 0                 | 1 (<1%)                     | 1 (<1%)                            |
| FEXOFENADINE                     | 1 (1%)            | 0                           | 1 (<1%)                            |
| FEXOFENADINE HYDROCHLORIDE       | 0                 | 2 (1%)                      | 0                                  |
| FLUTICASONE PROPIONATE           | 0                 | 1 (<1%)                     | 1 (<1%)                            |
| LIDOCAINE                        | 0                 | 2 (1%)                      | 0                                  |
| SODIUM CHLORIDE                  | 1 (1%)            | 1 (<1%)                     | 0                                  |
| ACETYLCYSTEINE                   | 0                 | 1 (<1%)                     | 0                                  |
| ATROPINE SULFATE                 | 0                 | 1 (<1%)                     | 0                                  |
| BENZONATATE                      | 0                 | 0                           | 1 (<1%)                            |
| CHLORPHENAMINE                   | 0                 | 0                           | 1 (<1%)                            |
| CICLESONIDE                      | 0                 | 0                           | 1 (<1%)                            |

Note: A medication may be included in more than one ATC Level category and appear more than once.

Note: The following ingredient terms, which do not have associated ATC Level 1 terms, were also used during Treatment with the following frequencies: Bovine Prostate: SAL 50mcg-1 subject, <1%, Capsicum Annum: SAL 50mcg-1 subject, <1%, Dextroamphetamine Saccharate: Placebo-1 subject, 1%, Lactoperoxidase: Placebo-1 subject, 1%, and Zinc Arginate: SAL 50mcg-1 subject, <1%.

dln73797: /arenv/arprod/ccil18781\_gr33343/asq112989/final/drivers/cm\_t005\_noncopddur.sas 24AUG2010 15:59

141

CONFIDENTIAL

ASQ112989

Protocol: ASQ112989  
Population: Modified Intent-to-treat

Page 17 of 24

Table 1.24  
Summary of Non-COPD Medications Taken During Treatment

| ATC Level 1<br>Ingredient        | Placebo<br>(N=75) | SAL 50mcg<br>BID<br>(N=151) | FSC<br>250/50mcg<br>BID<br>(N=139) |
|----------------------------------|-------------------|-----------------------------|------------------------------------|
| COCAINE                          | 0                 | 0                           | 1 (<1%)                            |
| CODEINE                          | 0                 | 0                           | 1 (<1%)                            |
| CODEINE PHOSPHATE                | 0                 | 1 (<1%)                     | 0                                  |
| DIPHENHYDRAMINE CITRATE          | 0                 | 1 (<1%)                     | 0                                  |
| LEVOCETIRIZINE HYDROCHLORIDE     | 0                 | 1 (<1%)                     | 0                                  |
| LIDOCAINE HYDROCHLORIDE          | 0                 | 1 (<1%)                     | 0                                  |
| MECLOZINE                        | 0                 | 1 (<1%)                     | 0                                  |
| MONTELUKAST SODIUM               | 0                 | 1 (<1%)                     | 0                                  |
| OXYMETAZOLINE HYDROCHLORIDE      | 0                 | 1 (<1%)                     | 0                                  |
| PHENYLEPHRINE                    | 0                 | 0                           | 1 (<1%)                            |
| PROMETHAZINE HYDROCHLORIDE       | 0                 | 1 (<1%)                     | 0                                  |
| PSEUDOEPHEDRINE                  | 0                 | 0                           | 1 (<1%)                            |
| RETINOL                          | 0                 | 1 (<1%)                     | 0                                  |
| SUDAFED (NOS)                    | 0                 | 1 (<1%)                     | 0                                  |
| TYLENOL COLD NOS                 | 0                 | 1 (<1%)                     | 0                                  |
| DERMATOLOGICALS                  |                   |                             |                                    |
| Any medication                   | 13 (17%)          | 24 (16%)                    | 15 (11%)                           |
| GLYCERYL TRINITRATE              | 1 (1%)            | 6 (4%)                      | 1 (<1%)                            |
| TOCOPHEROL                       | 2 (3%)            | 4 (3%)                      | 2 (1%)                             |
| BENADRYL (NOS)                   | 0                 | 2 (1%)                      | 3 (2%)                             |
| DIPHENHYDRAMINE                  | 1 (1%)            | 1 (<1%)                     | 2 (1%)                             |
| PROMETHAZINE                     | 2 (3%)            | 2 (1%)                      | 0                                  |
| DIPHENHYDRAMINE<br>HYDROCHLORIDE | 0                 | 3 (2%)                      | 0                                  |
| FINASTERIDE                      | 2 (3%)            | 1 (<1%)                     | 0                                  |

Note: A medication may be included in more than one ATC Level category and appear more than once.  
Note: The following ingredient terms, which do not have associated ATC Level 1 terms, were also used during Treatment with the following frequencies: Bovine Prostate: SAL 50mcg-1 subject, <1%, Capsicum Annum: SAL 50mcg-1 subject, <1%, Dextroamphetamine Saccharate: Placebo-1 subject, 1%, Lactoperoxidase: Placebo-1 subject, 1%, and Zinc Arginate: SAL 50mcg-1 subject, <1%.  
dln73797: /arenv/arprod/ccil18781\_gr33343/asq112989/final/drivers/cm\_t005\_noncopddur.sas 24AUG2010 15:59

142

CONFIDENTIAL

ASQ112989

Protocol: ASQ112989  
Population: Modified Intent-to-treat

Page 18 of 24

Table 1.24  
Summary of Non-COPD Medications Taken During Treatment

| ATC Level 1<br>Ingredient  | Placebo<br>(N=75) | SAL 50mcg<br>BID<br>(N=151) | FSC<br>250/50mcg<br>BID<br>(N=139) |
|----------------------------|-------------------|-----------------------------|------------------------------------|
| ACYCLOVIR                  | 0                 | 1 (<1%)                     | 1 (<1%)                            |
| BENZOCAINE                 | 0                 | 1 (<1%)                     | 1 (<1%)                            |
| BETACAROTENE               | 0                 | 2 (1%)                      | 0                                  |
| FLUTICASONE PROPIONATE     | 0                 | 1 (<1%)                     | 1 (<1%)                            |
| HYDROCORTISONE             | 0                 | 2 (1%)                      | 0                                  |
| LIDOCAINE                  | 0                 | 2 (1%)                      | 0                                  |
| METRONIDAZOLE              | 1 (1%)            | 1 (<1%)                     | 0                                  |
| SELENIUM                   | 0                 | 1 (<1%)                     | 1 (<1%)                            |
| ZINC OXIDE                 | 0                 | 2 (1%)                      | 0                                  |
| AMINO BENZOIC ACID         | 0                 | 0                           | 1 (<1%)                            |
| CLINDAMYCIN                | 0                 | 1 (<1%)                     | 0                                  |
| CLOTRIMAZOLE               | 0                 | 0                           | 1 (<1%)                            |
| COCAINE                    | 0                 | 0                           | 1 (<1%)                            |
| DIPHENHYDRAMINE CITRATE    | 0                 | 1 (<1%)                     | 0                                  |
| FLUCONAZOLE                | 1 (1%)            | 0                           | 0                                  |
| HYALURONIC ACID            | 1 (1%)            | 0                           | 0                                  |
| HYDROCORTISONE VALERATE    | 0                 | 1 (<1%)                     | 0                                  |
| KETOCONAZOLE               | 0                 | 0                           | 1 (<1%)                            |
| LIDOCAINE HYDROCHLORIDE    | 0                 | 1 (<1%)                     | 0                                  |
| LYSOZYME                   | 1 (1%)            | 0                           | 0                                  |
| PHENYL SALICYLATE          | 1 (1%)            | 0                           | 0                                  |
| PROMETHAZINE HYDROCHLORIDE | 0                 | 1 (<1%)                     | 0                                  |
| RETINOL                    | 0                 | 1 (<1%)                     | 0                                  |
| TETRACAINE HYDROCHLORIDE   | 0                 | 0                           | 1 (<1%)                            |
| TETRACYCLINE               | 1 (1%)            | 0                           | 0                                  |

Note: A medication may be included in more than one ATC Level category and appear more than once.

Note: The following ingredient terms, which do not have associated ATC Level 1 terms, were also used during Treatment with the following frequencies: Bovine Prostate: SAL 50mcg-1 subject, <1%, Capsicum Annum: SAL 50mcg-1 subject, <1%, Dextroamphetamine Saccharate: Placebo-1 subject, 1%, Lactoperoxidase: Placebo-1 subject, 1%, and Zinc Arginate: SAL 50mcg-1 subject, <1%.

dln73797: /arenv/arprod/ccil18781\_gr33343/asq112989/final/drivers/cm\_t005\_noncopddur.sas 24AUG2010 15:59

143

CONFIDENTIAL

ASQ112989

Protocol: ASQ112989  
Population: Modified Intent-to-treat

Page 19 of 24

Table 1.24  
Summary of Non-COPD Medications Taken During Treatment

| ATC Level 1<br>Ingredient   | Placebo<br>(N=75) | SAL 50mcg<br>BID<br>(N=151) | FSC<br>250/50mcg<br>BID<br>(N=139) |
|-----------------------------|-------------------|-----------------------------|------------------------------------|
| -----                       |                   |                             |                                    |
| SENSORY ORGANS              |                   |                             |                                    |
| Any medication              | 10 (13%)          | 19 (13%)                    | 15 (11%)                           |
| CLONIDINE                   | 1 (1%)            | 4 (3%)                      | 5 (4%)                             |
| PHENYLEPHRINE HYDROCHLORIDE | 1 (1%)            | 0                           | 2 (1%)                             |
| ACYCLOVIR                   | 0                 | 1 (<1%)                     | 1 (<1%)                            |
| CLONIDINE HYDROCHLORIDE     | 0                 | 1 (<1%)                     | 1 (<1%)                            |
| DICLOFENAC                  | 1 (1%)            | 1 (<1%)                     | 0                                  |
| HYDROCORTISONE              | 0                 | 2 (1%)                      | 0                                  |
| LATANOPROST                 | 1 (1%)            | 1 (<1%)                     | 0                                  |
| LIDOCAINE                   | 0                 | 2 (1%)                      | 0                                  |
| SODIUM CHLORIDE             | 1 (1%)            | 1 (<1%)                     | 0                                  |
| ACETYLCYSTEINE              | 0                 | 1 (<1%)                     | 0                                  |
| ATROPINE SULFATE            | 0                 | 1 (<1%)                     | 0                                  |
| BENZYLPENICILLIN            | 0                 | 0                           | 1 (<1%)                            |
| BRIMONIDINE TARTRATE        | 0                 | 1 (<1%)                     | 0                                  |
| CIPROFLOXACIN               | 0                 | 1 (<1%)                     | 0                                  |
| CIPROFLOXACIN HYDROCHLORIDE | 1 (1%)            | 0                           | 0                                  |
| COCAINE                     | 0                 | 0                           | 1 (<1%)                            |
| CORTISONE                   | 0                 | 1 (<1%)                     | 0                                  |
| DICLOFENAC SODIUM           | 0                 | 1 (<1%)                     | 0                                  |
| DICLOFENAC                  | 1 (1%)            | 0                           | 0                                  |
| HYDROXYETHYLPYRROLIDINE     | 0                 | 0                           | 0                                  |
| HYALURONIC ACID             | 1 (1%)            | 0                           | 0                                  |
| HYOSCINE HYDROBROMIDE       | 0                 | 1 (<1%)                     | 0                                  |
| INDOMETACIN                 | 0                 | 0                           | 1 (<1%)                            |
| INTERFERON BETA             | 0                 | 0                           | 1 (<1%)                            |

Note: A medication may be included in more than one ATC Level category and appear more than once.

Note: The following ingredient terms, which do not have associated ATC Level 1 terms, were also used during Treatment with the following frequencies: Bovine Prostate: SAL 50mcg-1 subject, <1%, Capsicum Annum: SAL 50mcg-1 subject, <1%, Dextroamphetamine Saccharate: Placebo-1 subject, 1%, Lactoperoxidase: Placebo-1 subject, 1%, and Zinc Arginate: SAL 50mcg-1 subject, <1%.

dln73797: /arenv/arprod/ccil8781\_gr33343/asq112989/final/drivers/cm\_t005\_noncopddur.sas 24AUG2010 15:59

144

CONFIDENTIAL

ASQ112989



Protocol: ASQ112989  
Population: Modified Intent-to-treat

Page 20 of 24

Table 1.24  
Summary of Non-COPD Medications Taken During Treatment

| ATC Level 1<br>Ingredient                                             | Placebo<br>(N=75) | SAL 50mcg<br>BID<br>(N=151) | FSC<br>250/50mcg<br>BID<br>(N=139) |
|-----------------------------------------------------------------------|-------------------|-----------------------------|------------------------------------|
| ISOSORBIDE                                                            | 1 (1%)            | 0                           | 0                                  |
| KETOROLAC TROMETAMOL                                                  | 1 (1%)            | 0                           | 0                                  |
| LIDOCAINE HYDROCHLORIDE                                               | 0                 | 1 (<1%)                     | 0                                  |
| OPTIVE (NOS)                                                          | 0                 | 0                           | 1 (<1%)                            |
| OXYMETAZOLINE HYDROCHLORIDE                                           | 0                 | 1 (<1%)                     | 0                                  |
| PHENYLEPHRINE                                                         | 0                 | 0                           | 1 (<1%)                            |
| PIROXICAM                                                             | 0                 | 1 (<1%)                     | 0                                  |
| RETINOL                                                               | 0                 | 1 (<1%)                     | 0                                  |
| TETRACAINE HYDROCHLORIDE                                              | 0                 | 0                           | 1 (<1%)                            |
| TETRACYCLINE                                                          | 1 (1%)            | 0                           | 0                                  |
| TIMOLOL                                                               | 0                 | 1 (<1%)                     | 0                                  |
| TIMOLOL MALEATE                                                       | 1 (1%)            | 0                           | 0                                  |
| SYSTEMIC HORMONAL<br>PREPARATIONS, EXCL. SEX<br>HORMONES AND INSULINS |                   |                             |                                    |
| Any medication                                                        | 5 (7%)            | 16 (11%)                    | 10 (7%)                            |
| LEVOTHYROXINE SODIUM                                                  | 3 (4%)            | 5 (3%)                      | 5 (4%)                             |
| LEVOTHYROXINE                                                         | 1 (1%)            | 8 (5%)                      | 3 (2%)                             |
| HYDROCORTISONE                                                        | 0                 | 2 (1%)                      | 0                                  |
| CALCITONIN, SALMON                                                    | 1 (1%)            | 0                           | 0                                  |
| CORTISONE                                                             | 0                 | 1 (<1%)                     | 0                                  |
| HYDROCORTISONE VALERATE                                               | 0                 | 1 (<1%)                     | 0                                  |
| MELATONIN                                                             | 0                 | 1 (<1%)                     | 0                                  |
| PREDNISONE                                                            | 0                 | 0                           | 1 (<1%)                            |
| THIAMAZOLE                                                            | 0                 | 0                           | 1 (<1%)                            |

Note: A medication may be included in more than one ATC Level category and appear more than once.

Note: The following ingredient terms, which do not have associated ATC Level 1 terms, were also used during Treatment with the following frequencies: Bovine Prostate: SAL 50mcg-1 subject, <1%, Capsicum Annum: SAL 50mcg-1 subject, <1%, Dextroamphetamine Saccharate: Placebo-1 subject, 1%, Lactoperoxidase: Placebo-1 subject, 1%, and Zinc Arginate: SAL 50mcg-1 subject, <1%.

dln73797: /arenv/arprod/ccil8781\_gr33343/asq112989/final/drivers/cm\_t005\_noncopddur.sas 24AUG2010 15:59

145

CONFIDENTIAL

ASQ112989

Protocol: ASQ112989  
Population: Modified Intent-to-treat

Page 21 of 24

Table 1.24  
Summary of Non-COPD Medications Taken During Treatment

| ATC Level 1<br>Ingredient       | Placebo<br>(N=75) | SAL 50mcg<br>BID<br>(N=151) | FSC<br>250/50mcg<br>BID<br>(N=139) |
|---------------------------------|-------------------|-----------------------------|------------------------------------|
| ANTIINFECTIVES FOR SYSTEMIC USE |                   |                             |                                    |
| Any medication                  | 9 (12%)           | 10 (7%)                     | 7 (5%)                             |
| AMOXICILLIN                     | 2 (3%)            | 3 (2%)                      | 0                                  |
| DOXYCYCLINE                     | 2 (3%)            | 2 (1%)                      | 0                                  |
| ACYCLOVIR                       | 0                 | 1 (<1%)                     | 1 (<1%)                            |
| METRONIDAZOLE                   | 1 (1%)            | 1 (<1%)                     | 0                                  |
| MOXIFLOXACIN                    | 1 (1%)            | 1 (<1%)                     | 0                                  |
| PNEUMOCOCCAL VACCINE            | 0                 | 2 (1%)                      | 0                                  |
| BENZYL PENICILLIN               | 0                 | 0                           | 1 (<1%)                            |
| CEFALEXIN                       | 0                 | 0                           | 1 (<1%)                            |
| CILASTATIN SODIUM               | 0                 | 1 (<1%)                     | 0                                  |
| CIPROFLOXACIN                   | 0                 | 1 (<1%)                     | 0                                  |
| CIPROFLOXACIN HYDROCHLORIDE     | 1 (1%)            | 0                           | 0                                  |
| CLINDAMYCIN                     | 0                 | 1 (<1%)                     | 0                                  |
| EFAVIRENZ                       | 0                 | 1 (<1%)                     | 0                                  |
| EMTRICITABINE                   | 0                 | 1 (<1%)                     | 0                                  |
| FLUCONAZOLE                     | 1 (1%)            | 0                           | 0                                  |
| H1N1 INFLUENZA VACCINE          | 1 (1%)            | 0                           | 0                                  |
| IMIPENEM                        | 0                 | 1 (<1%)                     | 0                                  |
| IMMUNOGLOBULINS NOS             | 0                 | 0                           | 1 (<1%)                            |
| INFLUENZA VACCINE               | 0                 | 1 (<1%)                     | 0                                  |
| KETOCONAZOLE                    | 0                 | 0                           | 1 (<1%)                            |
| LYSOZYME                        | 1 (1%)            | 0                           | 0                                  |
| METHENAMINE                     | 1 (1%)            | 0                           | 0                                  |

Note: A medication may be included in more than one ATC Level category and appear more than once.

Note: The following ingredient terms, which do not have associated ATC Level 1 terms, were also used during Treatment with the following frequencies: Bovine Prostate: SAL 50mcg-1 subject, <1%, Capsicum Annum: SAL 50mcg-1 subject, <1%, Dextroamphetamine Saccharate: Placebo-1 subject, 1%, Lactoperoxidase: Placebo-1 subject, 1%, and Zinc Arginate: SAL 50mcg-1 subject, <1%.

dln73797: /arenv/arprod/ccil18781\_gr33343/asq112989/final/drivers/cm\_t005\_noncopddur.sas 24AUG2010 15:59

146

CONFIDENTIAL

ASQ112989

Protocol: ASQ112989  
Population: Modified Intent-to-treat

Page 22 of 24

Table 1.24  
Summary of Non-COPD Medications Taken During Treatment

| ATC Level 1<br>Ingredient        | Placebo<br>(N=75) | SAL 50mcg<br>BID<br>(N=151) | FSC<br>250/50mcg<br>BID<br>(N=139) |
|----------------------------------|-------------------|-----------------------------|------------------------------------|
| SULFAMETHOXAZOLE                 | 0                 | 1 (<1%)                     | 0                                  |
| TENOFOVIR DISOPROXIL<br>FUMARATE | 0                 | 1 (<1%)                     | 0                                  |
| TETRACYCLINE                     | 1 (1%)            | 0                           | 0                                  |
| TRIMETHOPRIM                     | 0                 | 1 (<1%)                     | 0                                  |
| VALACICLOVIR HYDROCHLORIDE       | 0                 | 0                           | 1 (<1%)                            |
| VANCOMYCIN                       | 0                 | 0                           | 1 (<1%)                            |
| VARIOUS                          |                   |                             |                                    |
| Any medication                   | 7 (9%)            | 9 (6%)                      | 9 (6%)                             |
| CHONDROITIN                      | 1 (1%)            | 2 (1%)                      | 2 (1%)                             |
| AMBIGUOUS MEDICATION             | 1 (1%)            | 2 (1%)                      | 0                                  |
| DIMETHYL SULFONE                 | 0                 | 2 (1%)                      | 1 (<1%)                            |
| OXYGEN                           | 0                 | 1 (<1%)                     | 2 (1%)                             |
| PLANTAGO OVATA                   | 0                 | 1 (<1%)                     | 2 (1%)                             |
| ALLIUM SATIVUM                   | 0                 | 1 (<1%)                     | 1 (<1%)                            |
| CINNAMOMUM VERUM                 | 0                 | 0                           | 2 (1%)                             |
| ECHINACEA                        | 0                 | 1 (<1%)                     | 1 (<1%)                            |
| HERBALS NOS                      | 0                 | 2 (1%)                      | 0                                  |
| MONASCUS PURPUREUS               | 1 (1%)            | 0                           | 1 (<1%)                            |
| ACETYLCYSTEINE                   | 0                 | 1 (<1%)                     | 0                                  |
| ANTIOXIDANTS NOS                 | 0                 | 1 (<1%)                     | 0                                  |
| EUGENIA CARYOPHYLLATA            | 0                 | 1 (<1%)                     | 0                                  |
| GLUCOSE OXIDASE                  | 1 (1%)            | 0                           | 0                                  |
| HERBAL EXTRACTS NOS              | 0                 | 1 (<1%)                     | 0                                  |
| HYDRASTIS CANADENSIS             | 0                 | 1 (<1%)                     | 0                                  |

Note: A medication may be included in more than one ATC Level category and appear more than once.

Note: The following ingredient terms, which do not have associated ATC Level 1 terms, were also used during Treatment with the following frequencies: Bovine Prostate: SAL 50mcg-1 subject, <1%, Capsicum Annum: SAL 50mcg-1 subject, <1%, Dextroamphetamine Saccharate: Placebo-1 subject, 1%, Lactoperoxidase: Placebo-1 subject, 1%, and Zinc Arginate: SAL 50mcg-1 subject, <1%.

dln73797: /arenv/arprod/ccil18781\_gr33343/asq112989/final/drivers/cm\_t005\_noncopddur.sas 24AUG2010 15:59

147

CONFIDENTIAL

ASQ112989

Protocol: ASQ112989  
Population: Modified Intent-to-treat

Page 23 of 24

Table 1.24  
Summary of Non-COPD Medications Taken During Treatment

| ATC Level 1<br>Ingredient                              | Placebo<br>(N=75) | SAL 50mcg<br>BID<br>(N=151) | FSC<br>250/50mcg<br>BID<br>(N=139) |
|--------------------------------------------------------|-------------------|-----------------------------|------------------------------------|
| LACTOFERRIN                                            | 1 (1%)            | 0                           | 0                                  |
| LINUM USITATISSIMUM OIL                                | 0                 | 0                           | 1 (<1%)                            |
| MEDICAGO SATIVA                                        | 0                 | 1 (<1%)                     | 0                                  |
| MEDICATION UNKNOWN                                     | 1 (1%)            | 0                           | 0                                  |
| METHIONINE                                             | 0                 | 1 (<1%)                     | 0                                  |
| METHYLTHIONINIUM CHLORIDE                              | 1 (1%)            | 0                           | 0                                  |
| NALOXONE HYDROCHLORIDE                                 | 0                 | 0                           | 1 (<1%)                            |
| OENOTHERA BIENNIS OIL                                  | 0                 | 0                           | 1 (<1%)                            |
| PHYTOSTEROL (NOS)                                      | 1 (1%)            | 0                           | 0                                  |
| SOYA LECITHIN                                          | 0                 | 1 (<1%)                     | 0                                  |
| VITIS VINIFERA EXTRACT                                 | 0                 | 0                           | 1 (<1%)                            |
| ZEA MAYS                                               | 0                 | 1 (<1%)                     | 0                                  |
| ANTINEOPLASTIC AND<br>IMMUNOMODULATING AGENTS          |                   |                             |                                    |
| Any medication                                         | 2 (3%)            | 4 (3%)                      | 6 (4%)                             |
| ESTRADIOL                                              | 1 (1%)            | 2 (1%)                      | 1 (<1%)                            |
| ESTROGENS CONJUGATED                                   | 0                 | 0                           | 2 (1%)                             |
| TAMOXIFEN                                              | 0                 | 1 (<1%)                     | 1 (<1%)                            |
| BEVACIZUMAB                                            | 0                 | 0                           | 1 (<1%)                            |
| CICLOSPORIN                                            | 0                 | 1 (<1%)                     | 0                                  |
| INTERFERON BETA                                        | 0                 | 0                           | 1 (<1%)                            |
| RALOXIFENE HYDROCHLORIDE                               | 1 (1%)            | 0                           | 0                                  |
| ANTIPARASITIC PRODUCTS,<br>INSECTICIDES AND REPELLENTS |                   |                             |                                    |

Note: A medication may be included in more than one ATC Level category and appear more than once.  
Note: The following ingredient terms, which do not have associated ATC Level 1 terms, were also used during Treatment with the following frequencies: Bovine Prostate: SAL 50mcg-1 subject, <1%, Capsicum Annuum: SAL 50mcg-1 subject, <1%, Dextroamphetamine Saccharate: Placebo-1 subject, 1%, Lactoperoxidase: Placebo-1 subject, 1%, and Zinc Arginate: SAL 50mcg-1 subject, <1%.  
dln73797: /arenv/arprod/ccil8781\_gr33343/asq112989/final/drivers/cm\_t005\_noncopddur.sas 24AUG2010 15:59

Protocol: ASQ112989  
 Population: Modified Intent-to-treat

Page 24 of 24

Table 1.24  
 Summary of Non-COPD Medications Taken During Treatment

| ATC Level 1<br>Ingredient | Placebo<br>(N=75) | SAL 50mcg<br>BID<br>(N=151) | FSC<br>250/50mcg<br>BID<br>(N=139) |
|---------------------------|-------------------|-----------------------------|------------------------------------|
| Any medication            | 1 (1%)            | 1 (<1%)                     | 0                                  |
| METRONIDAZOLE             | 1 (1%)            | 1 (<1%)                     | 0                                  |

149

CONFIDENTIAL

ASQ112989

Note: A medication may be included in more than one ATC Level category and appear more than once.  
 Note: The following ingredient terms, which do not have associated ATC Level 1 terms, were also used during Treatment with the following frequencies: Bovine Prostate: SAL 50mcg-1 subject, <1%, Capsicum Annum: SAL 50mcg-1 subject, <1%, Dextroamphetamine Saccharate: Placebo-1 subject, 1%, Lactoperoxidase: Placebo-1 subject, 1%, and Zinc Arginate: SAL 50mcg-1 subject, <1%.  
 dln73797: /arenv/arprod/ccil8781\_gr33343/asq112989/final/drivers/cm\_t005\_noncopddur.sas 24AUG2010 15:59

Protocol: ASQ112989  
Population: Modified Intent-to-treat

Page 1 of 22

Table 1.25  
Summary of Non-COPD Medications Taken Post-Treatment

| ATC Level 1<br>Ingredient | Placebo<br>(N=75) | SAL 50mcg<br>BID<br>(N=151) | FSC<br>250/50mcg<br>BID<br>(N=139) |
|---------------------------|-------------------|-----------------------------|------------------------------------|
| Any medication            | 62 (83%)          | 134 (89%)                   | 126 (91%)                          |
| NERVOUS SYSTEM            |                   |                             |                                    |
| Any medication            | 46 (61%)          | 101 (67%)                   | 97 (70%)                           |
| ACETYLSALICYLIC ACID      | 20 (27%)          | 44 (29%)                    | 48 (35%)                           |
| PARACETAMOL               | 10 (13%)          | 37 (25%)                    | 32 (23%)                           |
| IBUPROFEN                 | 9 (12%)           | 20 (13%)                    | 12 (9%)                            |
| ALPRAZOLAM                | 4 (5%)            | 8 (5%)                      | 9 (6%)                             |
| GABAPENTIN                | 2 (3%)            | 6 (4%)                      | 8 (6%)                             |
| TRAZODONE                 | 2 (3%)            | 3 (2%)                      | 6 (4%)                             |
| HYDROCODONE               | 1 (1%)            | 6 (4%)                      | 3 (2%)                             |
| CLONAZEPAM                | 1 (1%)            | 2 (1%)                      | 6 (4%)                             |
| CLONIDINE                 | 0                 | 4 (3%)                      | 5 (4%)                             |
| DULOXETINE                | 3 (4%)            | 3 (2%)                      | 1 (<1%)                            |
| FLUOXETINE HYDROCHLORIDE  | 2 (3%)            | 2 (1%)                      | 3 (2%)                             |
| LORAZEPAM                 | 1 (1%)            | 2 (1%)                      | 4 (3%)                             |
| SERTRALINE HYDROCHLORIDE  | 0                 | 3 (2%)                      | 4 (3%)                             |
| BUPROPION HYDROCHLORIDE   | 1 (1%)            | 2 (1%)                      | 3 (2%)                             |
| ESCITALOPRAM OXALATE      | 1 (1%)            | 2 (1%)                      | 3 (2%)                             |
| OXYCODONE HYDROCHLORIDE   | 1 (1%)            | 2 (1%)                      | 3 (2%)                             |
| PAROXETINE HYDROCHLORIDE  | 1 (1%)            | 2 (1%)                      | 3 (2%)                             |
| BUPROPION                 | 2 (3%)            | 1 (<1%)                     | 2 (1%)                             |
| CITALOPRAM HYDROBROMIDE   | 1 (1%)            | 2 (1%)                      | 2 (1%)                             |
| DIAZEPAM                  | 0                 | 4 (3%)                      | 1 (<1%)                            |
| TEMAZEPAM                 | 1 (1%)            | 3 (2%)                      | 1 (<1%)                            |
| TRAMADOL HYDROCHLORIDE    | 1 (1%)            | 2 (1%)                      | 2 (1%)                             |

Note: A medication may be included in more than one ATC Level category and appear more than once.

Note: The following ingredient terms, which do not have associated ATC Level 1 terms, were also used during Post-Treatment with the following frequencies: Bovine Prostate: SAL 50mcg-1 subject, <1%, Capsicum Annum: SAL 50mcg-1 subject, <1%, Dextroamphetamine Saccharate: Placebo-1 subject, 1%, Lactoperoxidase: Placebo-1 subject, 1%, and Zinc Arginate: SAL 50mcg-1 subject, <1%.

dln73797: /arenv/arprod/ccil18781\_gr33343/asq112989/final/drivers/cm\_t006\_noncopdpst.sas 24AUG2010 16:04

150

CONFIDENTIAL

ASQ112989

Protocol: ASQ112989  
 Population: Modified Intent-to-treat

Page 2 of 22

Table 1.25  
 Summary of Non-COPD Medications Taken Post-Treatment

| ATC Level 1<br>Ingredient        | Placebo<br>(N=75) | SAL 50mcg<br>BID<br>(N=151) | FSC<br>250/50mcg<br>BID<br>(N=139) |
|----------------------------------|-------------------|-----------------------------|------------------------------------|
| ZOLPIDEM TARTRATE                | 1 (1%)            | 1 (<1%)                     | 3 (2%)                             |
| CYCLOBENZAPRINE<br>HYDROCHLORIDE | 1 (1%)            | 0                           | 3 (2%)                             |
| ROPINIROLE HYDROCHLORIDE         | 0                 | 1 (<1%)                     | 3 (2%)                             |
| VARENICLINE TARTRATE             | 2 (3%)            | 1 (<1%)                     | 1 (<1%)                            |
| VENLAFAXINE HYDROCHLORIDE        | 0                 | 3 (2%)                      | 1 (<1%)                            |
| AMITRIPTYLINE                    | 0                 | 2 (1%)                      | 1 (<1%)                            |
| AMITRIPTYLINE HYDROCHLORIDE      | 0                 | 1 (<1%)                     | 2 (1%)                             |
| ARIPIPRAZOLE                     | 1 (1%)            | 1 (<1%)                     | 1 (<1%)                            |
| CAFFEINE                         | 0                 | 2 (1%)                      | 1 (<1%)                            |
| CITALOPRAM                       | 1 (1%)            | 1 (<1%)                     | 1 (<1%)                            |
| DEXTROPROPOXYPHENE NAPSILATE     | 0                 | 0                           | 3 (2%)                             |
| OLANZAPINE                       | 1 (1%)            | 1 (<1%)                     | 1 (<1%)                            |
| OXYCODONE                        | 0                 | 1 (<1%)                     | 2 (1%)                             |
| PAROXETINE                       | 0                 | 3 (2%)                      | 0                                  |
| PREGABALIN                       | 1 (1%)            | 0                           | 2 (1%)                             |
| SERTRALINE                       | 0                 | 0                           | 3 (2%)                             |
| TRAMADOL                         | 1 (1%)            | 0                           | 2 (1%)                             |
| CAPSAICIN                        | 0                 | 0                           | 2 (1%)                             |
| CLONIDINE HYDROCHLORIDE          | 0                 | 1 (<1%)                     | 1 (<1%)                            |
| CYCLOBENZAPRINE                  | 0                 | 1 (<1%)                     | 1 (<1%)                            |
| ESZOPICLONE                      | 1 (1%)            | 1 (<1%)                     | 0                                  |
| HYDROXYZINE                      | 0                 | 2 (1%)                      | 0                                  |
| HYDROXYZINE HYDROCHLORIDE        | 1 (1%)            | 1 (<1%)                     | 0                                  |
| KETOROLAC TROMETAMOL             | 1 (1%)            | 0                           | 1 (<1%)                            |
| LAMOTRIGINE                      | 0                 | 0                           | 2 (1%)                             |

Note: A medication may be included in more than one ATC Level category and appear more than once.  
 Note: The following ingredient terms, which do not have associated ATC Level 1 terms, were also used during Post-Treatment with the following frequencies: Bovine Prostate: SAL 50mcg-1 subject, <1%, Capsicum Annum: SAL 50mcg-1 subject, <1%, Dextroamphetamine Saccharate: Placebo-1 subject, 1%, Lactoperoxidase: Placebo-1 subject, 1%, and Zinc Arginate: SAL 50mcg-1 subject, <1%.  
 dln73797: /arenv/arprod/ccil8781\_gr33343/asq112989/final/drivers/cm\_t006\_noncopdpst.sas 24AUG2010 16:04

151

CONFIDENTIAL

ASQ112989

Protocol: ASQ112989  
Population: Modified Intent-to-treat

Page 3 of 22

Table 1.25  
Summary of Non-COPD Medications Taken Post-Treatment

| ATC Level 1<br>Ingredient        | Placebo<br>(N=75) | SAL 50mcg<br>BID<br>(N=151) | FSC<br>250/50mcg<br>BID<br>(N=139) |
|----------------------------------|-------------------|-----------------------------|------------------------------------|
| LIDOCAINE                        | 0                 | 2 (1%)                      | 0                                  |
| NICOTINE                         | 0                 | 0                           | 2 (<1%)                            |
| NORTRIPTYLINE                    | 1 (1%)            | 0                           | 1 (<1%)                            |
| QUETIAPINE FUMARATE              | 1 (1%)            | 0                           | 1 (<1%)                            |
| AMFETAMINE ASPARTATE             | 1 (1%)            | 0                           | 0                                  |
| AMFETAMINE SULFATE               | 1 (1%)            | 0                           | 0                                  |
| BECLAMIDE                        | 0                 | 0                           | 1 (<1%)                            |
| BENZODIAZEPINE, NOS              | 0                 | 1 (<1%)                     | 0                                  |
| BETHANECHOL CHLORIDE             | 0                 | 1 (<1%)                     | 0                                  |
| BUPRENORPHINE HYDROCHLORIDE      | 0                 | 0                           | 1 (<1%)                            |
| BUSPIRONE                        | 0                 | 1 (<1%)                     | 0                                  |
| BUSPIRONE HYDROCHLORIDE          | 0                 | 1 (<1%)                     | 0                                  |
| BUTALBITAL                       | 0                 | 0                           | 1 (<1%)                            |
| CARBAMAZEPINE                    | 0                 | 0                           | 1 (<1%)                            |
| COCAINE                          | 0                 | 0                           | 1 (<1%)                            |
| CODEINE                          | 0                 | 0                           | 1 (<1%)                            |
| DEXAMFETAMINE SULFATE            | 1 (1%)            | 0                           | 0                                  |
| DIPOTASSIUM CLORAZEPATE          | 0                 | 0                           | 1 (<1%)                            |
| DOXYLAMINE SUCCINATE             | 0                 | 0                           | 1 (<1%)                            |
| EXCEDRIN (NOS)                   | 0                 | 1 (<1%)                     | 0                                  |
| FLUOXETINE                       | 1 (1%)            | 0                           | 0                                  |
| METHYLPHENIDATE<br>HYDROCHLORIDE | 0                 | 0                           | 1 (<1%)                            |
| MIRTAZAPINE                      | 0                 | 0                           | 1 (<1%)                            |
| MORPHINE                         | 0                 | 0                           | 1 (<1%)                            |
| PHENOBARBITAL                    | 0                 | 1 (<1%)                     | 0                                  |

Note: A medication may be included in more than one ATC Level category and appear more than once.

Note: The following ingredient terms, which do not have associated ATC Level 1 terms, were also used during Post-Treatment with the following frequencies: Bovine Prostate: SAL 50mcg-1 subject, <1%, Capsicum Annum: SAL 50mcg-1 subject, <1%, Dextroamphetamine Saccharate: Placebo-1 subject, 1%, Lactoperoxidase: Placebo-1 subject, 1%, and Zinc Arginate: SAL 50mcg-1 subject, <1%.

dln73797: /arenv/arprod/ccil18781\_gr33343/asq112989/final/drivers/cm\_t006\_noncopdpst.sas 24AUG2010 16:04

152

CONFIDENTIAL

ASQ112989



Protocol: ASQ112989  
 Population: Modified Intent-to-treat

Page 4 of 22

Table 1.25  
 Summary of Non-COPD Medications Taken Post-Treatment

| ATC Level 1<br>Ingredient    | Placebo<br>(N=75) | SAL 50mcg<br>BID<br>(N=151) | FSC<br>250/50mcg<br>BID<br>(N=139) |
|------------------------------|-------------------|-----------------------------|------------------------------------|
| PHENYTOIN                    | 0                 | 1 (<1%)                     | 0                                  |
| PRAMIPEXOLE DIHYDROCHLORIDE  | 0                 | 0                           | 1 (<1%)                            |
| PROCAINE HYDROCHLORIDE       | 0                 | 1 (<1%)                     | 0                                  |
| PROCHLORPERAZINE             | 0                 | 0                           | 1 (<1%)                            |
| PROMETHAZINE                 | 1 (1%)            | 0                           | 0                                  |
| ROPINIROLE                   | 0                 | 0                           | 1 (<1%)                            |
| SULTOPRIDE                   | 1 (1%)            | 0                           | 0                                  |
| TOMEXETINE HYDROCHLORIDE     | 0                 | 0                           | 1 (<1%)                            |
| TRAZODONE HYDROCHLORIDE      | 0                 | 1 (<1%)                     | 0                                  |
| VALPROIC ACID                | 0                 | 0                           | 1 (<1%)                            |
| VENLAFAXINE                  | 1 (1%)            | 0                           | 0                                  |
| <b>CARDIOVASCULAR SYSTEM</b> |                   |                             |                                    |
| Any medication               | 48 (64%)          | 95 (63%)                    | 84 (60%)                           |
| LISINOPRIL                   | 13 (17%)          | 23 (15%)                    | 29 (21%)                           |
| HYDROCHLOROTHIAZIDE          | 7 (9%)            | 24 (16%)                    | 23 (17%)                           |
| SIMVASTATIN                  | 13 (17%)          | 21 (14%)                    | 14 (10%)                           |
| AMLODIPINE BESILATE          | 4 (5%)            | 10 (7%)                     | 9 (6%)                             |
| ATORVASTATIN CALCIUM         | 2 (3%)            | 9 (6%)                      | 10 (7%)                            |
| AMLODIPINE                   | 3 (4%)            | 10 (7%)                     | 7 (5%)                             |
| ATENOLOL                     | 6 (8%)            | 8 (5%)                      | 4 (3%)                             |
| CARVEDILOL                   | 2 (3%)            | 5 (3%)                      | 11 (8%)                            |
| METOPROLOL                   | 3 (4%)            | 10 (7%)                     | 5 (4%)                             |
| FISH OIL                     | 3 (4%)            | 7 (5%)                      | 7 (5%)                             |
| FUROSEMIDE                   | 3 (4%)            | 8 (5%)                      | 6 (4%)                             |
| VALSARTAN                    | 1 (1%)            | 8 (5%)                      | 7 (5%)                             |

Note: A medication may be included in more than one ATC Level category and appear more than once.  
 Note: The following ingredient terms, which do not have associated ATC Level 1 terms, were also used during Post-Treatment with the following frequencies: Bovine Prostate: SAL 50mcg-1 subject, <1%, Capsicum Annum: SAL 50mcg-1 subject, <1%, Dextroamphetamine Saccharate: Placebo-1 subject, 1%, Lactoperoxidase: Placebo-1 subject, 1%, and Zinc Arginate: SAL 50mcg-1 subject, <1%.  
 dln73797: /arenv/arprod/ccil8781\_gr33343/asq112989/final/drivers/cm\_t006\_noncopdpst.sas 24AUG2010 16:04

153

CONFIDENTIAL

ASQ112989

Protocol: ASQ112989  
Population: Modified Intent-to-treat

Page 5 of 22

Table 1.25  
Summary of Non-COPD Medications Taken Post-Treatment

| ATC Level 1<br>Ingredient    | Placebo<br>(N=75) | SAL 50mcg<br>BID<br>(N=151) | FSC<br>250/50mcg<br>BID<br>(N=139) |
|------------------------------|-------------------|-----------------------------|------------------------------------|
| PRAVASTATIN                  | 5 (7%)            | 6 (4%)                      | 4 (3%)                             |
| OLMESARTAN                   | 2 (3%)            | 9 (6%)                      | 1 (<1%)                            |
| LOVASTATIN                   | 2 (3%)            | 2 (1%)                      | 6 (4%)                             |
| ROSUVASTATIN CALCIUM         | 1 (1%)            | 4 (3%)                      | 5 (4%)                             |
| CLONIDINE                    | 0                 | 4 (3%)                      | 5 (4%)                             |
| FENOFIBRATE                  | 0                 | 4 (3%)                      | 4 (3%)                             |
| EZETIMIBE                    | 2 (3%)            | 4 (3%)                      | 1 (<1%)                            |
| TRIAMTERENE                  | 2 (3%)            | 2 (1%)                      | 3 (2%)                             |
| DIGOXIN                      | 1 (1%)            | 4 (3%)                      | 1 (<1%)                            |
| GEMFIBROZIL                  | 1 (1%)            | 2 (1%)                      | 3 (2%)                             |
| GLYCERYL TRINITRATE          | 1 (1%)            | 4 (3%)                      | 1 (<1%)                            |
| OMEGA-3 MARINE TRIGLYCERIDES | 3 (4%)            | 2 (1%)                      | 1 (<1%)                            |
| ENALAPRIL                    | 0                 | 2 (1%)                      | 3 (2%)                             |
| METOPROLOL TARTRATE          | 0                 | 0                           | 5 (4%)                             |
| NICOTINIC ACID               | 0                 | 2 (1%)                      | 3 (2%)                             |
| UBIDECARENONE                | 1 (1%)            | 2 (1%)                      | 2 (1%)                             |
| BENAZEPRIL                   | 0                 | 3 (2%)                      | 1 (<1%)                            |
| DILTIAZEM                    | 0                 | 4 (3%)                      | 0                                  |
| DILTIAZEM HYDROCHLORIDE      | 0                 | 0                           | 4 (3%)                             |
| IRBESARTAN                   | 0                 | 3 (2%)                      | 1 (<1%)                            |
| METOPROLOL SUCCINATE         | 2 (3%)            | 0                           | 2 (1%)                             |
| NEBIVOLOL HYDROCHLORIDE      | 1 (1%)            | 1 (<1%)                     | 2 (1%)                             |
| TERAZOSIN                    | 2 (3%)            | 1 (<1%)                     | 1 (<1%)                            |
| VERAPAMIL                    | 0                 | 4 (3%)                      | 0                                  |
| DOXAZOSIN MESILATE           | 2 (3%)            | 0                           | 1 (<1%)                            |
| LOSARTAN POTASSIUM           | 1 (1%)            | 0                           | 2 (1%)                             |

Note: A medication may be included in more than one ATC Level category and appear more than once.

Note: The following ingredient terms, which do not have associated ATC Level 1 terms, were also used during Post-Treatment with the following frequencies: Bovine Prostate: SAL 50mcg-1 subject, <1%, Capsicum Annum: SAL 50mcg-1 subject, <1%, Dextroamphetamine Saccharate: Placebo-1 subject, 1%, Lactoperoxidase: Placebo-1 subject, 1%, and Zinc Arginate: SAL 50mcg-1 subject, <1%.

dln73797: /arenv/arprod/ccil18781\_gr33343/asq112989/final/drivers/cm\_t006\_noncopdpst.sas 24AUG2010 16:04

154

CONFIDENTIAL

ASQ112989

Protocol: ASQ112989  
 Population: Modified Intent-to-treat

Page 6 of 22

Table 1.25  
 Summary of Non-COPD Medications Taken Post-Treatment

| ATC Level 1<br>Ingredient | Placebo<br>(N=75) | SAL 50mcg<br>BID<br>(N=151) | FSC<br>250/50mcg<br>BID<br>(N=139) |
|---------------------------|-------------------|-----------------------------|------------------------------------|
| NIFEDIPINE                | 0                 | 1 (<1%)                     | 2 (1%)                             |
| TORASEMIDE                | 0                 | 2 (1%)                      | 1 (<1%)                            |
| BENAZEPRIL HYDROCHLORIDE  | 0                 | 1 (<1%)                     | 1 (<1%)                            |
| CLONIDINE HYDROCHLORIDE   | 0                 | 1 (<1%)                     | 1 (<1%)                            |
| HYDRALAZINE               | 0                 | 1 (<1%)                     | 1 (<1%)                            |
| LIDOCAINE                 | 0                 | 2 (1%)                      | 0                                  |
| METOLAZONE                | 0                 | 2 (1%)                      | 0                                  |
| MONASCUS PURPUREUS        | 1 (1%)            | 0                           | 1 (<1%)                            |
| NADOLOL                   | 1 (1%)            | 0                           | 1 (<1%)                            |
| PENTOXIFYLLINE            | 2 (3%)            | 0                           | 0                                  |
| PRAVASTATIN SODIUM        | 0                 | 2 (1%)                      | 0                                  |
| QUINAPRIL                 | 1 (1%)            | 0                           | 1 (<1%)                            |
| TADALAFIL                 | 1 (1%)            | 0                           | 1 (<1%)                            |
| TERAZOSIN HYDROCHLORIDE   | 1 (1%)            | 0                           | 1 (<1%)                            |
| ALDACTONE (NOS)           | 0                 | 1 (<1%)                     | 0                                  |
| AMIODARONE                | 0                 | 1 (<1%)                     | 0                                  |
| BISOPROLOL FUMARATE       | 0                 | 0                           | 1 (<1%)                            |
| BUMETANIDE                | 1 (1%)            | 0                           | 0                                  |
| DOFETILIDE                | 0                 | 0                           | 1 (<1%)                            |
| DOXAZOSIN                 | 1 (1%)            | 0                           | 0                                  |
| DRONEDARONE               | 0                 | 1 (<1%)                     | 0                                  |
| ENALAPRIL MALEATE         | 1 (1%)            | 0                           | 0                                  |
| FELODIPINE                | 0                 | 0                           | 1 (<1%)                            |
| FLUVASTATIN SODIUM        | 0                 | 1 (<1%)                     | 0                                  |
| HEPARIN SODIUM            | 0                 | 0                           | 1 (<1%)                            |
| HYDRALAZINE HYDROCHLORIDE | 0                 | 0                           | 1 (<1%)                            |

Note: A medication may be included in more than one ATC Level category and appear more than once.  
 Note: The following ingredient terms, which do not have associated ATC Level 1 terms, were also used during Post-Treatment with the following frequencies: Bovine Prostate: SAL 50mcg-1 subject, <1%, Capsicum Annum: SAL 50mcg-1 subject, <1%, Dextroamphetamine Saccharate: Placebo-1 subject, 1%, Lactoperoxidase: Placebo-1 subject, 1%, and Zinc Arginate: SAL 50mcg-1 subject, <1%.  
 dln73797: /arenv/arprod/ccil18781\_gr33343/asq112989/final/drivers/cm\_t006\_noncopdpst.sas 24AUG2010 16:04

155

CONFIDENTIAL

ASQ112989

Protocol: ASQ112989  
Population: Modified Intent-to-treat

Page 7 of 22

Table 1.25  
Summary of Non-COPD Medications Taken Post-Treatment

| ATC Level 1<br>Ingredient          | Placebo<br>(N=75) | SAL 50mcg<br>BID<br>(N=151) | FSC<br>250/50mcg<br>BID<br>(N=139) |
|------------------------------------|-------------------|-----------------------------|------------------------------------|
| HYDROCORTISONE                     | 0                 | 1 (<1%)                     | 0                                  |
| INDAPAMIDE                         | 0                 | 0                           | 1 (<1%)                            |
| ISOSORBIDE                         | 1 (1%)            | 0                           | 0                                  |
| MOEXIPRIL HYDROCHLORIDE            | 0                 | 0                           | 1 (<1%)                            |
| NEBIVOLOL                          | 0                 | 1 (<1%)                     | 0                                  |
| PETROSELINUM CRISPUM               | 0                 | 1 (<1%)                     | 0                                  |
| PHENYLEPHRINE HYDROCHLORIDE        | 1 (1%)            | 0                           | 0                                  |
| PHYTOSTEROL (NOS)                  | 1 (1%)            | 0                           | 0                                  |
| PROCAINE HYDROCHLORIDE             | 0                 | 1 (<1%)                     | 0                                  |
| QUINAPRIL HYDROCHLORIDE            | 1 (1%)            | 0                           | 0                                  |
| ROSUVASTATIN                       | 1 (1%)            | 0                           | 0                                  |
| SILODOSIN                          | 1 (1%)            | 0                           | 0                                  |
| SPIRONOLACTONE                     | 1 (1%)            | 0                           | 0                                  |
| TELMISARTAN                        | 0                 | 0                           | 1 (<1%)                            |
| TIMOLOL                            | 0                 | 1 (<1%)                     | 0                                  |
| TIMOLOL MALEATE                    | 1 (1%)            | 0                           | 0                                  |
| TRANDOLAPRIL                       | 0                 | 1 (<1%)                     | 0                                  |
| ALIMENTARY TRACT AND<br>METABOLISM |                   |                             |                                    |
| Any medication                     | 41 (55%)          | 89 (59%)                    | 93 (67%)                           |
| ACETYLSALICYLIC ACID               | 20 (27%)          | 44 (29%)                    | 48 (35%)                           |
| VITAMINS NOS                       | 11 (15%)          | 17 (11%)                    | 22 (16%)                           |
| OMEPRAZOLE                         | 5 (7%)            | 19 (13%)                    | 16 (12%)                           |
| CALCIUM                            | 5 (7%)            | 8 (5%)                      | 13 (9%)                            |
| METFORMIN                          | 0                 | 6 (4%)                      | 10 (7%)                            |

Note: A medication may be included in more than one ATC Level category and appear more than once.  
Note: The following ingredient terms, which do not have associated ATC Level 1 terms, were also used during Post-Treatment with the following frequencies: Bovine Prostate: SAL 50mcg-1 subject, <1%, Capsicum Annum: SAL 50mcg-1 subject, <1%, Dextroamphetamine Saccharate: Placebo-1 subject, 1%, Lactoperoxidase: Placebo-1 subject, 1%, and Zinc Arginate: SAL 50mcg-1 subject, <1%.  
dln73797: /arenv/arprod/ccil18781\_gr33343/asq112989/final/drivers/cm\_t006\_noncopdpst.sas 24AUG2010 16:04

Protocol: ASQ112989

Population: Modified Intent-to-treat

Page 8 of 22

Table 1.25  
Summary of Non-COPD Medications Taken Post-Treatment

| ATC Level 1<br>Ingredient | Placebo<br>(N=75) | SAL 50mcg<br>BID<br>(N=151) | FSC<br>250/50mcg<br>BID<br>(N=139) |
|---------------------------|-------------------|-----------------------------|------------------------------------|
| ASCORBIC ACID             | 3 (4%)            | 9 (6%)                      | 2 (1%)                             |
| POTASSIUM CHLORIDE        | 3 (4%)            | 5 (3%)                      | 5 (4%)                             |
| ESOMEPRAZOLE MAGNESIUM    | 1 (1%)            | 5 (3%)                      | 6 (4%)                             |
| PANTOPRAZOLE              | 1 (1%)            | 3 (2%)                      | 8 (6%)                             |
| VITAMIN D NOS             | 3 (4%)            | 5 (3%)                      | 4 (3%)                             |
| ERGOCALCIFEROL            | 2 (3%)            | 4 (3%)                      | 5 (4%)                             |
| METFORMIN HYDROCHLORIDE   | 2 (3%)            | 2 (1%)                      | 7 (5%)                             |
| MINERALS NOS              | 4 (5%)            | 3 (2%)                      | 4 (3%)                             |
| RANITIDINE                | 3 (4%)            | 5 (3%)                      | 1 (<1%)                            |
| FAMOTIDINE                | 2 (3%)            | 1 (<1%)                     | 5 (4%)                             |
| GLIPIZIDE                 | 1 (1%)            | 4 (3%)                      | 3 (2%)                             |
| RANITIDINE HYDROCHLORIDE  | 2 (3%)            | 4 (3%)                      | 2 (1%)                             |
| TOCOPHEROL                | 2 (3%)            | 4 (3%)                      | 2 (1%)                             |
| CALCIUM CARBONATE         | 2 (3%)            | 1 (<1%)                     | 3 (2%)                             |
| LANSOPRAZOLE              | 0                 | 3 (2%)                      | 3 (2%)                             |
| GLIBENCLAMIDE             | 1 (1%)            | 3 (2%)                      | 1 (<1%)                            |
| POTASSIUM NOS             | 0                 | 3 (2%)                      | 2 (1%)                             |
| GLIMEPIRIDE               | 0                 | 1 (<1%)                     | 3 (2%)                             |
| INSULIN ASPART            | 1 (1%)            | 1 (<1%)                     | 1 (<1%)                            |
| INSULIN GLARGINE          | 0                 | 1 (<1%)                     | 2 (1%)                             |
| LOPERAMIDE HYDROCHLORIDE  | 1 (1%)            | 0                           | 2 (1%)                             |
| PLANTAGO OVATA            | 0                 | 1 (<1%)                     | 2 (1%)                             |
| PYRIDOXINE HYDROCHLORIDE  | 0                 | 2 (1%)                      | 1 (<1%)                            |
| SITAGLIPTIN               | 0                 | 1 (<1%)                     | 2 (1%)                             |
| THIAMINE HYDROCHLORIDE    | 1 (1%)            | 1 (<1%)                     | 1 (<1%)                            |
| ZINC                      | 1 (1%)            | 1 (<1%)                     | 1 (<1%)                            |

Note: A medication may be included in more than one ATC Level category and appear more than once.

Note: The following ingredient terms, which do not have associated ATC Level 1 terms, were also used during Post-Treatment with the following frequencies: Bovine Prostate: SAL 50mcg-1 subject, <1%, Capsicum Annuum: SAL 50mcg-1 subject, <1%, Dextroamphetamine Saccharate: Placebo-1 subject, 1%, Lactoperoxidase: Placebo-1 subject, 1%, and Zinc Arginate: SAL 50mcg-1 subject, <1%.

dln73797: /arenv/arprod/ccil18781\_gr33343/asq112989/final/drivers/cm\_t006\_noncopdpst.sas 24AUG2010 16:04

157

CONFIDENTIAL

ASQ112989

Protocol: ASQ112989  
Population: Modified Intent-to-treat

Page 9 of 22

Table 1.25  
Summary of Non-COPD Medications Taken Post-Treatment

| ATC Level 1<br>Ingredient            | Placebo<br>(N=75) | SAL 50mcg<br>BID<br>(N=151) | FSC<br>250/50mcg<br>BID<br>(N=139) |
|--------------------------------------|-------------------|-----------------------------|------------------------------------|
| BETACAROTENE                         | 0                 | 2 (1%)                      | 0                                  |
| CALCIUM CITRATE                      | 1 (1%)            | 0                           | 1 (<1%)                            |
| CINNAMOMUM VERUM                     | 0                 | 0                           | 2 (1%)                             |
| CLOTRIMAZOLE                         | 0                 | 0                           | 2 (1%)                             |
| COLECALCIFEROL                       | 0                 | 0                           | 2 (1%)                             |
| COPPER                               | 0                 | 2 (1%)                      | 0                                  |
| DEXLANSOPRAZOLE                      | 0                 | 1 (<1%)                     | 1 (<1%)                            |
| HYOSCYAMINE SULFATE                  | 1 (1%)            | 1 (<1%)                     | 0                                  |
| INSULIN DETEMIR                      | 2 (3%)            | 0                           | 0                                  |
| INSULIN HUMAN INJECTION,<br>ISOPHANE | 1 (1%)            | 0                           | 1 (<1%)                            |
| LACTOBACILLUS ACIDOPHILUS            | 1 (1%)            | 1 (<1%)                     | 0                                  |
| MAGNESIUM OXIDE                      | 0                 | 2 (1%)                      | 0                                  |
| METRONIDAZOLE                        | 1 (1%)            | 1 (<1%)                     | 0                                  |
| PIOGLITAZONE HYDROCHLORIDE           | 1 (1%)            | 0                           | 1 (<1%)                            |
| PREDNISONE                           | 0                 | 0                           | 2 (1%)                             |
| RABEPRAZOLE SODIUM                   | 0                 | 1 (<1%)                     | 1 (<1%)                            |
| RIBOFLAVIN                           | 0                 | 2 (1%)                      | 0                                  |
| SELENIUM                             | 0                 | 1 (<1%)                     | 1 (<1%)                            |
| SENNA                                | 0                 | 0                           | 2 (1%)                             |
| TETRACYCLINE                         | 1 (1%)            | 0                           | 1 (<1%)                            |
| VITAMIN B SUBSTANCES NOS             | 0                 | 1 (<1%)                     | 1 (<1%)                            |
| ATROPINE SULFATE                     | 0                 | 1 (<1%)                     | 0                                  |
| BIOTIN                               | 0                 | 0                           | 1 (<1%)                            |
| CHOLINE BITARTRATE                   | 0                 | 0                           | 1 (<1%)                            |
| CITRIC ACID                          | 0                 | 0                           | 1 (<1%)                            |

Note: A medication may be included in more than one ATC Level category and appear more than once.

Note: The following ingredient terms, which do not have associated ATC Level 1 terms, were also used during Post-Treatment with the following frequencies: Bovine Prostate: SAL 50mcg-1 subject, <1%, Capsicum Annum: SAL 50mcg-1 subject, <1%, Dextroamphetamine Saccharate: Placebo-1 subject, 1%, Lactoperoxidase: Placebo-1 subject, 1%, and Zinc Arginate: SAL 50mcg-1 subject, <1%.

dln73797: /arenv/arprod/ccil8781\_gr33343/asq112989/final/drivers/cm\_t006\_noncopdpst.sas 24AUG2010 16:04

158

CONFIDENTIAL

ASQ112989

Protocol: ASQ112989

Page 10 of 22

Population: Modified Intent-to-treat

Table 1.25  
Summary of Non-COPD Medications Taken Post-Treatment

| ATC Level 1<br>Ingredient             | Placebo<br>(N=75) | SAL 50mcg<br>BID<br>(N=151) | FSC<br>250/50mcg<br>BID<br>(N=139) |
|---------------------------------------|-------------------|-----------------------------|------------------------------------|
| DEXAMFETAMINE SULFATE                 | 1 (1%)            | 0                           | 0                                  |
| DICYCLOVERINE HYDROCHLORIDE           | 0                 | 0                           | 1 (<1%)                            |
| DIHYDROXYALUMINUM SODIUM<br>CARBONATE | 0                 | 1 (<1%)                     | 0                                  |
| DOCUSATE                              | 0                 | 0                           | 1 (<1%)                            |
| DOCUSATE SODIUM                       | 1 (1%)            | 0                           | 0                                  |
| DULCOLAX (NOS)                        | 1 (1%)            | 0                           | 0                                  |
| ESOMEPRAZOLE                          | 1 (1%)            | 0                           | 0                                  |
| HYDROCORTISONE                        | 0                 | 1 (<1%)                     | 0                                  |
| HYDROCORTISONE VALERATE               | 0                 | 1 (<1%)                     | 0                                  |
| HYOSCINE HYDROBROMIDE                 | 0                 | 1 (<1%)                     | 0                                  |
| INSULIN HUMAN                         | 1 (1%)            | 0                           | 0                                  |
| INSULIN LISPRO                        | 0                 | 1 (<1%)                     | 0                                  |
| ISOPHANE INSULIN                      | 0                 | 0                           | 1 (<1%)                            |
| MAGNESIUM                             | 0                 | 0                           | 1 (<1%)                            |
| MAGNESIUM GLUCONATE                   | 0                 | 0                           | 1 (<1%)                            |
| MECLOZINE                             | 0                 | 1 (<1%)                     | 0                                  |
| METOCLOPRAMIDE HYDROCHLORIDE          | 1 (1%)            | 0                           | 0                                  |
| PANTOTHENIC ACID                      | 0                 | 1 (<1%)                     | 0                                  |
| POTASSIUM GLUCONATE                   | 0                 | 1 (<1%)                     | 0                                  |
| PROCHLORPERAZINE                      | 0                 | 0                           | 1 (<1%)                            |
| PROMETHAZINE                          | 1 (1%)            | 0                           | 0                                  |
| PYRIDOXINE                            | 0                 | 1 (<1%)                     | 0                                  |
| REPAGLINIDE                           | 0                 | 0                           | 1 (<1%)                            |
| RETINOL                               | 0                 | 1 (<1%)                     | 0                                  |
| ROSIGLITAZONE                         | 0                 | 0                           | 1 (<1%)                            |

Note: A medication may be included in more than one ATC Level category and appear more than once.

Note: The following ingredient terms, which do not have associated ATC Level 1 terms, were also used during Post-Treatment with the following frequencies: Bovine Prostate: SAL 50mcg-1 subject, <1%, Capsicum Annum: SAL 50mcg-1 subject, <1%, Dextroamphetamine Saccharate: Placebo-1 subject, 1%, Lactoperoxidase: Placebo-1 subject, 1%, and Zinc Arginate: SAL 50mcg-1 subject, <1%.

dln73797: /arenv/arprod/ccil8781\_gr33343/asq112989/final/drivers/cm\_t006\_noncopdpst.sas 24AUG2010 16:04

159

CONFIDENTIAL

ASQ112989

Protocol: ASQ112989  
Population: Modified Intent-to-treat

Page 11 of 22

Table 1.25  
Summary of Non-COPD Medications Taken Post-Treatment

| ATC Level 1<br>Ingredient      | Placebo<br>(N=75) | SAL 50mcg<br>BID<br>(N=151) | FSC<br>250/50mcg<br>BID<br>(N=139) |
|--------------------------------|-------------------|-----------------------------|------------------------------------|
| SILYBUM MARIANUM               | 0                 | 0                           | 1 (<1%)                            |
| SODIUM BICARBONATE             | 0                 | 0                           | 1 (<1%)                            |
| SODIUM CHLORIDE                | 1 (1%)            | 0                           | 0                                  |
| SUCRALFATE                     | 0                 | 0                           | 1 (<1%)                            |
| VITAMIN B NOS                  | 0                 | 1 (<1%)                     | 0                                  |
| ZEA MAYS                       | 0                 | 1 (<1%)                     | 0                                  |
| <b>MUSCULO-SKELETAL SYSTEM</b> |                   |                             |                                    |
| Any medication                 | 47 (63%)          | 70 (46%)                    | 74 (53%)                           |
| ACETYLSALICYLIC ACID           | 20 (27%)          | 44 (29%)                    | 48 (35%)                           |
| IBUPROFEN                      | 9 (12%)           | 20 (13%)                    | 12 (9%)                            |
| NAPROXEN SODIUM                | 7 (9%)            | 4 (3%)                      | 6 (4%)                             |
| NAPROXEN                       | 3 (4%)            | 4 (3%)                      | 5 (4%)                             |
| ALENDRONATE SODIUM             | 4 (5%)            | 4 (3%)                      | 3 (2%)                             |
| MELOXICAM                      | 5 (7%)            | 0                           | 3 (2%)                             |
| CHONDROITIN                    | 1 (1%)            | 2 (1%)                      | 2 (1%)                             |
| ALLOPURINOL                    | 0                 | 3 (2%)                      | 1 (<1%)                            |
| CELECOXIB                      | 1 (1%)            | 1 (<1%)                     | 2 (1%)                             |
| CYCLOBENZAPRINE                | 1 (1%)            | 0                           | 3 (2%)                             |
| HYDROCHLORIDE                  |                   |                             |                                    |
| GLUCOSAMINE                    | 1 (1%)            | 2 (1%)                      | 1 (<1%)                            |
| CARISOPRODOL                   | 1 (1%)            | 1 (<1%)                     | 1 (<1%)                            |
| COLCHICINE                     | 1 (1%)            | 1 (<1%)                     | 1 (<1%)                            |
| DIMETHYL SULFONE               | 0                 | 2 (1%)                      | 1 (<1%)                            |
| RISEDRONATE SODIUM             | 0                 | 0                           | 3 (2%)                             |
| ALENDRONIC ACID                | 1 (1%)            | 0                           | 1 (<1%)                            |

Note: A medication may be included in more than one ATC Level category and appear more than once.  
Note: The following ingredient terms, which do not have associated ATC Level 1 terms, were also used during Post-Treatment with the following frequencies: Bovine Prostate: SAL 50mcg-1 subject, <1%, Capsicum Annum: SAL 50mcg-1 subject, <1%, Dextroamphetamine Saccharate: Placebo-1 subject, 1%, Lactoperoxidase: Placebo-1 subject, 1%, and Zinc Arginate: SAL 50mcg-1 subject, <1%.

dln73797: /arenv/arprod/ccil18781\_gr33343/asq112989/final/drivers/cm\_t006\_noncopdpst.sas 24AUG2010 16:04



Protocol: ASQ112989  
 Population: Modified Intent-to-treat

Page 12 of 22

Table 1.25  
 Summary of Non-COPD Medications Taken Post-Treatment

| ATC Level 1<br>Ingredient      | Placebo<br>(N=75) | SAL 50mcg<br>BID<br>(N=151) | FSC<br>250/50mcg<br>BID<br>(N=139) |
|--------------------------------|-------------------|-----------------------------|------------------------------------|
| CAPSAICIN                      | 0                 | 0                           | 2 (1%)                             |
| CYCLOBENZAPRINE                | 0                 | 1 (<1%)                     | 1 (<1%)                            |
| DICLOFENAC                     | 1 (1%)            | 1 (<1%)                     | 0                                  |
| GLUCOSAMINE SULFATE            | 0                 | 1 (<1%)                     | 1 (<1%)                            |
| KETOROLAC TROMETAMOL           | 1 (1%)            | 0                           | 1 (<1%)                            |
| NABUMETONE                     | 0                 | 1 (<1%)                     | 1 (<1%)                            |
| SODIUM IBANDRONATE             | 0                 | 1 (<1%)                     | 1 (<1%)                            |
| BACLOFEN                       | 0                 | 0                           | 1 (<1%)                            |
| DICLOFENAC SODIUM              | 0                 | 1 (<1%)                     | 0                                  |
| ETODOLAC                       | 0                 | 1 (<1%)                     | 0                                  |
| FEBUXOSTAT                     | 0                 | 0                           | 1 (<1%)                            |
| GLUCOSAMINE HYDROCHLORIDE      | 0                 | 1 (<1%)                     | 0                                  |
| HYALURONIC ACID                | 1 (1%)            | 0                           | 0                                  |
| METAXALONE                     | 1 (1%)            | 0                           | 0                                  |
| PIROXICAM                      | 0                 | 1 (<1%)                     | 0                                  |
| TIZANIDINE HYDROCHLORIDE       | 0                 | 0                           | 1 (<1%)                            |
| ZOLEDRONIC ACID                | 0                 | 0                           | 1 (<1%)                            |
| BLOOD AND BLOOD FORMING ORGANS |                   |                             |                                    |
| Any medication                 | 26 (35%)          | 59 (39%)                    | 60 (43%)                           |
| ACETYLSALICYLIC ACID           | 20 (27%)          | 44 (29%)                    | 48 (35%)                           |
| CLOPIDOGREL BISULFATE          | 3 (4%)            | 9 (6%)                      | 7 (5%)                             |
| CYANOCOBALAMIN                 | 3 (4%)            | 8 (5%)                      | 4 (3%)                             |
| POTASSIUM CHLORIDE             | 3 (4%)            | 5 (3%)                      | 5 (4%)                             |
| FERROUS SULPHATE               | 1 (1%)            | 0                           | 5 (4%)                             |
| FOLIC ACID                     | 1 (1%)            | 3 (2%)                      | 2 (1%)                             |

Note: A medication may be included in more than one ATC Level category and appear more than once.  
 Note: The following ingredient terms, which do not have associated ATC Level 1 terms, were also used during Post-Treatment with the following frequencies: Bovine Prostate: SAL 50mcg-1 subject, <1%, Capsicum Annuum: SAL 50mcg-1 subject, <1%, Dextroamphetamine Saccharate: Placebo-1 subject, 1%, Lactoperoxidase: Placebo-1 subject, 1%, and Zinc Arginate: SAL 50mcg-1 subject, <1%.  
 dln73797: /arenv/arprod/ccil18781\_gr33343/asq112989/final/drivers/cm\_t006\_noncopdpst.sas 24AUG2010 16:04

161

CONFIDENTIAL

ASQ112989

Protocol: ASQ112989

Page 13 of 22

Population: Modified Intent-to-treat

Table 1.25  
Summary of Non-COPD Medications Taken Post-Treatment

| ATC Level 1<br>Ingredient                 | Placebo<br>(N=75) | SAL 50mcg<br>BID<br>(N=151) | FSC<br>250/50mcg<br>BID<br>(N=139) |
|-------------------------------------------|-------------------|-----------------------------|------------------------------------|
| POTASSIUM NOS                             | 0                 | 3 (2%)                      | 2 (1%)                             |
| WARFARIN SODIUM                           | 0                 | 2 (1%)                      | 2 (1%)                             |
| DIPYRIDAMOLE                              | 2 (3%)            | 1 (<1%)                     | 0                                  |
| WARFARIN                                  | 0                 | 2 (1%)                      | 1 (<1%)                            |
| CILOSTAZOL                                | 0                 | 0                           | 1 (<1%)                            |
| FERROUS GLUCONATE                         | 0                 | 0                           | 1 (<1%)                            |
| GLUCOSE OXIDASE                           | 1 (1%)            | 0                           | 0                                  |
| HEPARIN SODIUM                            | 0                 | 0                           | 1 (<1%)                            |
| IRON                                      | 0                 | 1 (<1%)                     | 0                                  |
| SODIUM BICARBONATE                        | 0                 | 0                           | 1 (<1%)                            |
| SODIUM CHLORIDE                           | 1 (1%)            | 0                           | 0                                  |
| GENITO URINARY SYSTEM AND SEX<br>HORMONES |                   |                             |                                    |
| Any medication                            | 24 (32%)          | 37 (25%)                    | 38 (27%)                           |
| IBUPROFEN                                 | 9 (12%)           | 20 (13%)                    | 12 (9%)                            |
| NAPROXEN SODIUM                           | 7 (9%)            | 4 (3%)                      | 6 (4%)                             |
| NAPROXEN                                  | 3 (4%)            | 4 (3%)                      | 5 (4%)                             |
| TAMSULOSIN HYDROCHLORIDE                  | 1 (1%)            | 1 (<1%)                     | 3 (2%)                             |
| ESTRADIOL                                 | 1 (1%)            | 2 (1%)                      | 1 (<1%)                            |
| TERAZOSIN                                 | 2 (3%)            | 1 (<1%)                     | 1 (<1%)                            |
| DIMETHYL SULFONE                          | 0                 | 2 (1%)                      | 1 (<1%)                            |
| DOXAZOSIN MESILATE                        | 2 (3%)            | 0                           | 1 (<1%)                            |
| DUTASTERIDE                               | 0                 | 1 (<1%)                     | 2 (1%)                             |
| FINASTERIDE                               | 2 (3%)            | 1 (<1%)                     | 0                                  |
| SERENOA REPENS                            | 0                 | 1 (<1%)                     | 2 (1%)                             |

Note: A medication may be included in more than one ATC Level category and appear more than once.

Note: The following ingredient terms, which do not have associated ATC Level 1 terms, were also used during Post-Treatment with the following frequencies: Bovine Prostate: SAL 50mcg-1 subject, <1%, Capsicum Annuum: SAL 50mcg-1 subject, <1%, Dextroamphetamine Saccharate: Placebo-1 subject, 1%, Lactoperoxidase: Placebo-1 subject, 1%, and Zinc Arginate: SAL 50mcg-1 subject, <1%.

dln73797: /arenv/arprod/ccil8781\_gr33343/asq112989/final/drivers/cm\_t006\_noncopdpst.sas 24AUG2010 16:04

162

CONFIDENTIAL

ASQ112989

Protocol: ASQ112989  
 Population: Modified Intent-to-treat

Page 14 of 22

Table 1.25  
 Summary of Non-COPD Medications Taken Post-Treatment

| ATC Level 1<br>Ingredient  | Placebo<br>(N=75) | SAL 50mcg<br>BID<br>(N=151) | FSC<br>250/50mcg<br>BID<br>(N=139) |
|----------------------------|-------------------|-----------------------------|------------------------------------|
| TOLTERODINE TARTRATE       | 0                 | 2 (1%)                      | 1 (<1%)                            |
| ALFUZOSIN HYDROCHLORIDE    | 0                 | 1 (<1%)                     | 1 (<1%)                            |
| CLOTRIMAZOLE               | 0                 | 0                           | 2 (1%)                             |
| COPPER                     | 0                 | 2 (1%)                      | 0                                  |
| ESTROGENS CONJUGATED       | 0                 | 0                           | 2 (1%)                             |
| METRONIDAZOLE              | 1 (1%)            | 1 (<1%)                     | 0                                  |
| OXYBUTYNYN HYDROCHLORIDE   | 0                 | 0                           | 2 (1%)                             |
| SILDENAFIL CITRATE         | 0                 | 2 (1%)                      | 0                                  |
| TADALAFIL                  | 1 (1%)            | 0                           | 1 (<1%)                            |
| TERAZOSIN HYDROCHLORIDE    | 1 (1%)            | 0                           | 1 (<1%)                            |
| CLINDAMYCIN                | 0                 | 1 (<1%)                     | 0                                  |
| DOXAZOSIN                  | 1 (1%)            | 0                           | 0                                  |
| KETOCONAZOLE               | 0                 | 0                           | 1 (<1%)                            |
| METHYLTHIONINIUM CHLORIDE  | 1 (1%)            | 0                           | 0                                  |
| NORETHISTERONE ACETATE     | 0                 | 0                           | 1 (<1%)                            |
| PHENYL SALICYLATE          | 1 (1%)            | 0                           | 0                                  |
| RALOXIFENE HYDROCHLORIDE   | 1 (1%)            | 0                           | 0                                  |
| SILODOSIN                  | 1 (1%)            | 0                           | 0                                  |
| SODIUM PHOSPHATE MONOBASIC | 1 (1%)            | 0                           | 0                                  |
| SOLIFENACIN SUCCINATE      | 0                 | 1 (<1%)                     | 0                                  |
| TAMSULOSIN                 | 1 (1%)            | 0                           | 0                                  |
| VARDENAFIL                 | 0                 | 0                           | 1 (<1%)                            |
| RESPIRATORY SYSTEM         |                   |                             |                                    |
| Any medication             | 11 (15%)          | 40 (26%)                    | 26 (19%)                           |
| HYDROCODONE BITARTRATE     | 3 (4%)            | 16 (11%)                    | 10 (7%)                            |

Note: A medication may be included in more than one ATC Level category and appear more than once.  
 Note: The following ingredient terms, which do not have associated ATC Level 1 terms, were also used during Post-Treatment with the following frequencies: Bovine Prostate: SAL 50mcg-1 subject, <1%, Capsicum Annum: SAL 50mcg-1 subject, <1%, Dextroamphetamine Saccharate: Placebo-1 subject, 1%, Lactoperoxidase: Placebo-1 subject, 1%, and Zinc Arginate: SAL 50mcg-1 subject, <1%.  
 dln73797: /arenv/arprod/ccil8781\_gr33343/asq112989/final/drivers/cm\_t006\_noncopdpst.sas 24AUG2010 16:04

163

CONFIDENTIAL

ASQ112989

Protocol: ASQ112989

Page 15 of 22

Population: Modified Intent-to-treat

Table 1.25  
Summary of Non-COPD Medications Taken Post-Treatment

| ATC Level 1<br>Ingredient        | Placebo<br>(N=75) | SAL 50mcg<br>BID<br>(N=151) | FSC<br>250/50mcg<br>BID<br>(N=139) |
|----------------------------------|-------------------|-----------------------------|------------------------------------|
| HYDROCODONE                      | 1 (1%)            | 6 (4%)                      | 3 (2%)                             |
| BENADRYL (NOS)                   | 0                 | 1 (<1%)                     | 3 (2%)                             |
| CETIRIZINE HYDROCHLORIDE         | 1 (1%)            | 1 (<1%)                     | 1 (<1%)                            |
| DIPHENHYDRAMINE                  | 1 (1%)            | 0                           | 2 (1%)                             |
| DIPHENHYDRAMINE<br>HYDROCHLORIDE | 0                 | 3 (2%)                      | 0                                  |
| LORATADINE                       | 1 (1%)            | 1 (<1%)                     | 1 (<1%)                            |
| CETIRIZINE                       | 0                 | 1 (<1%)                     | 1 (<1%)                            |
| CHLORPHENAMINE MALEATE           | 0                 | 1 (<1%)                     | 1 (<1%)                            |
| FEXOFENADINE                     | 1 (1%)            | 0                           | 1 (<1%)                            |
| FEXOFENADINE HYDROCHLORIDE       | 0                 | 2 (1%)                      | 0                                  |
| FLUTICASONE PROPIONATE           | 0                 | 1 (<1%)                     | 1 (<1%)                            |
| GUAIFENESIN                      | 1 (1%)            | 1 (<1%)                     | 0                                  |
| LIDOCAINE                        | 0                 | 2 (1%)                      | 0                                  |
| SUDAFED (NOS)                    | 0                 | 1 (<1%)                     | 1 (<1%)                            |
| ACETYLCYSTEINE                   | 0                 | 1 (<1%)                     | 0                                  |
| ATROPINE SULFATE                 | 0                 | 1 (<1%)                     | 0                                  |
| CHLORPHENAMINE                   | 0                 | 0                           | 1 (<1%)                            |
| CICLESONIDE                      | 0                 | 0                           | 1 (<1%)                            |
| COCAINE                          | 0                 | 0                           | 1 (<1%)                            |
| CODEINE                          | 0                 | 0                           | 1 (<1%)                            |
| DEXTROMETHORPHAN<br>HYDROBROMIDE | 0                 | 0                           | 1 (<1%)                            |
| DIPHENHYDRAMINE CITRATE          | 0                 | 1 (<1%)                     | 0                                  |
| DOXYLAMINE SUCCINATE             | 0                 | 0                           | 1 (<1%)                            |
| LEVOCETIRIZINE HYDROCHLORIDE     | 0                 | 1 (<1%)                     | 0                                  |

Note: A medication may be included in more than one ATC Level category and appear more than once.

Note: The following ingredient terms, which do not have associated ATC Level 1 terms, were also used during Post-Treatment with the following frequencies: Bovine Prostate: SAL 50mcg-1 subject, <1%, Capsicum Annum: SAL 50mcg-1 subject, <1%, Dextroamphetamine Saccharate: Placebo-1 subject, 1%, Lactoperoxidase: Placebo-1 subject, 1%, and Zinc Arginate: SAL 50mcg-1 subject, <1%.

dln73797: /arenv/arprod/ccil18781\_gr33343/asq112989/final/drivers/cm\_t006\_noncopdpst.sas 24AUG2010 16:04

164

CONFIDENTIAL

ASQ112989

Protocol: ASQ112989  
 Population: Modified Intent-to-treat

Page 16 of 22

Table 1.25  
 Summary of Non-COPD Medications Taken Post-Treatment

| ATC Level 1<br>Ingredient         | Placebo<br>(N=75) | SAL 50mcg<br>BID<br>(N=151) | FSC<br>250/50mcg<br>BID<br>(N=139) |
|-----------------------------------|-------------------|-----------------------------|------------------------------------|
| MECLOZINE                         | 0                 | 1 (<1%)                     | 0                                  |
| MONTELUKAST SODIUM                | 0                 | 1 (<1%)                     | 0                                  |
| OXYGEN                            | 0                 | 0                           | 1 (<1%)                            |
| OXYMETAZOLINE HYDROCHLORIDE       | 0                 | 1 (<1%)                     | 0                                  |
| PHENYLEPHRINE HYDROCHLORIDE       | 1 (1%)            | 0                           | 0                                  |
| PHENYLPROPANOLAMINE<br>BITARTRATE | 0                 | 0                           | 1 (<1%)                            |
| PROMETHAZINE                      | 1 (1%)            | 0                           | 0                                  |
| PSEUDOEPHEDRINE                   | 0                 | 0                           | 1 (<1%)                            |
| PSEUDOEPHEDRINE<br>HYDROCHLORIDE  | 0                 | 0                           | 1 (<1%)                            |
| RETINOL                           | 0                 | 1 (<1%)                     | 0                                  |
| SODIUM CHLORIDE                   | 1 (1%)            | 0                           | 0                                  |
| TYLENOL COLD NOS                  | 0                 | 1 (<1%)                     | 0                                  |
| DERMATOLOGICALS                   |                   |                             |                                    |
| Any medication                    | 11 (15%)          | 20 (13%)                    | 16 (12%)                           |
| TOCOPHEROL                        | 2 (3%)            | 4 (3%)                      | 2 (1%)                             |
| GLYCERYL TRINITRATE               | 1 (1%)            | 4 (3%)                      | 1 (<1%)                            |
| BENADRYL (NOS)                    | 0                 | 1 (<1%)                     | 3 (2%)                             |
| DIPHENHYDRAMINE                   | 1 (1%)            | 0                           | 2 (1%)                             |
| DIPHENHYDRAMINE<br>HYDROCHLORIDE  | 0                 | 3 (2%)                      | 0                                  |
| FINASTERIDE                       | 2 (3%)            | 1 (<1%)                     | 0                                  |
| ACYCLOVIR                         | 0                 | 1 (<1%)                     | 1 (<1%)                            |
| BETACAROTENE                      | 0                 | 2 (1%)                      | 0                                  |

Note: A medication may be included in more than one ATC Level category and appear more than once.  
 Note: The following ingredient terms, which do not have associated ATC Level 1 terms, were also used during Post-Treatment with the following frequencies: Bovine Prostate: SAL 50mcg-1 subject, <1%, Capsicum Annum: SAL 50mcg-1 subject, <1%, Dextroamphetamine Saccharate: Placebo-1 subject, 1%, Lactoperoxidase: Placebo-1 subject, 1%, and Zinc Arginate: SAL 50mcg-1 subject, <1%.  
 dln73797: /arenv/arprod/ccil8781\_gr33343/asq112989/final/drivers/cm\_t006\_noncopdpst.sas 24AUG2010 16:04

165

CONFIDENTIAL

ASQ112989

Protocol: ASQ112989  
Population: Modified Intent-to-treat

Page 17 of 22

Table 1.25  
Summary of Non-COPD Medications Taken Post-Treatment

| ATC Level 1<br>Ingredient | Placebo<br>(N=75) | SAL 50mcg<br>BID<br>(N=151) | FSC<br>250/50mcg<br>BID<br>(N=139) |
|---------------------------|-------------------|-----------------------------|------------------------------------|
| CLOTRIMAZOLE              | 0                 | 0                           | 2 (1%)                             |
| FLUTICASONE PROPIONATE    | 0                 | 1 (<1%)                     | 1 (<1%)                            |
| LIDOCAINE                 | 0                 | 2 (1%)                      | 0                                  |
| METRONIDAZOLE             | 1 (1%)            | 1 (<1%)                     | 0                                  |
| SELENIUM                  | 0                 | 1 (<1%)                     | 1 (<1%)                            |
| TETRACYCLINE              | 1 (1%)            | 0                           | 1 (<1%)                            |
| ZINC OXIDE                | 0                 | 2 (1%)                      | 0                                  |
| AMINOBENZOIC ACID         | 0                 | 0                           | 1 (<1%)                            |
| CLINDAMYCIN               | 0                 | 1 (<1%)                     | 0                                  |
| COCAINE                   | 0                 | 0                           | 1 (<1%)                            |
| DIPHENHYDRAMINE CITRATE   | 0                 | 1 (<1%)                     | 0                                  |
| HYALURONIC ACID           | 1 (1%)            | 0                           | 0                                  |
| HYDROCORTISONE            | 0                 | 1 (<1%)                     | 0                                  |
| HYDROCORTISONE VALERATE   | 0                 | 1 (<1%)                     | 0                                  |
| KETOCONAZOLE              | 0                 | 0                           | 1 (<1%)                            |
| LYSOZYME                  | 1 (1%)            | 0                           | 0                                  |
| PHENYL SALICYLATE         | 1 (1%)            | 0                           | 0                                  |
| PROMETHAZINE              | 1 (1%)            | 0                           | 0                                  |
| RETINOL                   | 0                 | 1 (<1%)                     | 0                                  |
| SENSORY ORGANS            |                   |                             |                                    |
| Any medication            | 8 (11%)           | 17 (11%)                    | 14 (10%)                           |
| CLONIDINE                 | 0                 | 4 (3%)                      | 5 (4%)                             |
| ACYCLOVIR                 | 0                 | 1 (<1%)                     | 1 (<1%)                            |
| CLONIDINE HYDROCHLORIDE   | 0                 | 1 (<1%)                     | 1 (<1%)                            |
| DICLOFENAC                | 1 (1%)            | 1 (<1%)                     | 0                                  |

Note: A medication may be included in more than one ATC Level category and appear more than once.

Note: The following ingredient terms, which do not have associated ATC Level 1 terms, were also used during Post-Treatment with the following frequencies: Bovine Prostate: SAL 50mcg-1 subject, <1%, Capsicum Annum: SAL 50mcg-1 subject, <1%, Dextroamphetamine Saccharate: Placebo-1 subject, 1%, Lactoperoxidase: Placebo-1 subject, 1%, and Zinc Arginate: SAL 50mcg-1 subject, <1%.

dln73797: /arenv/arprod/ccil18781\_gr33343/asq112989/final/drivers/cm\_t006\_noncopdpst.sas 24AUG2010 16:04

166

CONFIDENTIAL

ASQ112989

Protocol: ASQ112989  
Population: Modified Intent-to-treat

Page 18 of 22

Table 1.25  
Summary of Non-COPD Medications Taken Post-Treatment

| ATC Level 1<br>Ingredient   | Placebo<br>(N=75) | SAL 50mcg<br>BID<br>(N=151) | FSC<br>250/50mcg<br>BID<br>(N=139) |
|-----------------------------|-------------------|-----------------------------|------------------------------------|
| KETOROLAC TROMETAMOL        | 1 (1%)            | 0                           | 1 (<1%)                            |
| LATANOPROST                 | 1 (1%)            | 1 (<1%)                     | 0                                  |
| LIDOCAINE                   | 0                 | 2 (1%)                      | 0                                  |
| TETRACYCLINE                | 1 (1%)            | 0                           | 1 (<1%)                            |
| ACETYLCYSTEINE              | 0                 | 1 (<1%)                     | 0                                  |
| ATROPINE SULFATE            | 0                 | 1 (<1%)                     | 0                                  |
| BENZYL PENICILLIN           | 0                 | 0                           | 1 (<1%)                            |
| BRIMONIDINE TARTRATE        | 0                 | 1 (<1%)                     | 0                                  |
| COCAINE                     | 0                 | 0                           | 1 (<1%)                            |
| DICLOFENAC SODIUM           | 0                 | 1 (<1%)                     | 0                                  |
| HEPARIN SODIUM              | 0                 | 0                           | 1 (<1%)                            |
| HYALURONIC ACID             | 1 (1%)            | 0                           | 0                                  |
| HYDROCORTISONE              | 0                 | 1 (<1%)                     | 0                                  |
| HYOSCINE HYDROBROMIDE       | 0                 | 1 (<1%)                     | 0                                  |
| INTERFERON BETA             | 0                 | 0                           | 1 (<1%)                            |
| ISOSORBIDE                  | 1 (1%)            | 0                           | 0                                  |
| OPTIVE (NOS)                | 0                 | 0                           | 1 (<1%)                            |
| OXYMETAZOLINE HYDROCHLORIDE | 0                 | 1 (<1%)                     | 0                                  |
| PHENYLEPHRINE HYDROCHLORIDE | 1 (1%)            | 0                           | 0                                  |
| PIROXICAM                   | 0                 | 1 (<1%)                     | 0                                  |
| PROCAINE HYDROCHLORIDE      | 0                 | 1 (<1%)                     | 0                                  |
| RETINOL                     | 0                 | 1 (<1%)                     | 0                                  |
| SODIUM CHLORIDE             | 1 (1%)            | 0                           | 0                                  |
| TIMOLOL                     | 0                 | 1 (<1%)                     | 0                                  |
| TIMOLOL MALEATE             | 1 (1%)            | 0                           | 0                                  |

Note: A medication may be included in more than one ATC Level category and appear more than once.

Note: The following ingredient terms, which do not have associated ATC Level 1 terms, were also used during Post-Treatment with the following frequencies: Bovine Prostate: SAL 50mcg-1 subject, <1%, Capsicum Annum: SAL 50mcg-1 subject, <1%, Dextroamphetamine Saccharate: Placebo-1 subject, 1%, Lactoperoxidase: Placebo-1 subject, 1%, and Zinc Arginate: SAL 50mcg-1 subject, <1%.

dln73797: /arenv/arprod/ccil8781\_gr33343/asq112989/final/drivers/cm\_t006\_noncopdpst.sas 24AUG2010 16:04

167

CONFIDENTIAL

ASQ112989

Protocol: ASQ112989

Page 19 of 22

Population: Modified Intent-to-treat

Table 1.25  
Summary of Non-COPD Medications Taken Post-Treatment

| ATC Level 1<br>Ingredient                                             | Placebo<br>(N=75) | SAL 50mcg<br>BID<br>(N=151) | FSC<br>250/50mcg<br>BID<br>(N=139) |
|-----------------------------------------------------------------------|-------------------|-----------------------------|------------------------------------|
| SYSTEMIC HORMONAL<br>PREPARATIONS, EXCL. SEX<br>HORMONES AND INSULINS |                   |                             |                                    |
| Any medication                                                        | 5 (7%)            | 16 (11%)                    | 11 (8%)                            |
| LEVOTHYROXINE SODIUM                                                  | 3 (4%)            | 5 (3%)                      | 5 (4%)                             |
| LEVOTHYROXINE                                                         | 1 (1%)            | 8 (5%)                      | 3 (2%)                             |
| PREDNISON                                                             | 0                 | 0                           | 2 (1%)                             |
| CALCITONIN, SALMON                                                    | 1 (1%)            | 0                           | 0                                  |
| HYDROCORTISONE                                                        | 0                 | 1 (<1%)                     | 0                                  |
| HYDROCORTISONE VALERATE                                               | 0                 | 1 (<1%)                     | 0                                  |
| MELATONIN                                                             | 0                 | 1 (<1%)                     | 0                                  |
| THIAMAZOLE                                                            | 0                 | 0                           | 1 (<1%)                            |
| VARIOUS                                                               |                   |                             |                                    |
| Any medication                                                        | 6 (8%)            | 8 (5%)                      | 8 (6%)                             |
| CHONDROITIN                                                           | 1 (1%)            | 2 (1%)                      | 2 (1%)                             |
| AMBIGUOUS MEDICATION                                                  | 1 (1%)            | 2 (1%)                      | 0                                  |
| DIMETHYL SULFONE                                                      | 0                 | 2 (1%)                      | 1 (<1%)                            |
| PLANTAGO OVATA                                                        | 0                 | 1 (<1%)                     | 2 (1%)                             |
| ALLIUM SATIVUM                                                        | 0                 | 1 (<1%)                     | 1 (<1%)                            |
| CINNAMOMUM VERUM                                                      | 0                 | 0                           | 2 (1%)                             |
| ECHINACEA                                                             | 0                 | 1 (<1%)                     | 1 (<1%)                            |
| HERBALS NOS                                                           | 0                 | 2 (1%)                      | 0                                  |
| MONASCUS PURPUREUS                                                    | 1 (1%)            | 0                           | 1 (<1%)                            |
| ACETYLCYSTEINE                                                        | 0                 | 1 (<1%)                     | 0                                  |
| ANTIOXIDANTS NOS                                                      | 0                 | 1 (<1%)                     | 0                                  |

Note: A medication may be included in more than one ATC Level category and appear more than once.

Note: The following ingredient terms, which do not have associated ATC Level 1 terms, were also used during Post-Treatment with the following frequencies: Bovine Prostate: SAL 50mcg-1 subject, <1%, Capsicum Annuum: SAL 50mcg-1 subject, <1%, Dextroamphetamine Saccharate: Placebo-1 subject, 1%, Lactoperoxidase: Placebo-1 subject, 1%, and Zinc Arginate: SAL 50mcg-1 subject, <1%.

dln73797: /arenv/arprod/ccil8781\_gr33343/asq112989/final/drivers/cm\_t006\_noncopdpst.sas 24AUG2010 16:04

168

CONFIDENTIAL

ASQ112989



Protocol: ASQ112989  
 Population: Modified Intent-to-treat

Page 20 of 22

Table 1.25  
 Summary of Non-COPD Medications Taken Post-Treatment

| ATC Level 1<br>Ingredient       | Placebo<br>(N=75) | SAL 50mcg<br>BID<br>(N=151) | FSC<br>250/50mcg<br>BID<br>(N=139) |
|---------------------------------|-------------------|-----------------------------|------------------------------------|
| EUGENIA CARYOPHYLLATA           | 0                 | 1 (<1%)                     | 0                                  |
| GLUCOSE OXIDASE                 | 1 (1%)            | 0                           | 0                                  |
| HERBAL EXTRACTS NOS             | 0                 | 1 (<1%)                     | 0                                  |
| HYDRASTIS CANADENSIS            | 0                 | 1 (<1%)                     | 0                                  |
| LACTOFERRIN                     | 1 (1%)            | 0                           | 0                                  |
| LINUM USITATISSIMUM OIL         | 0                 | 0                           | 1 (<1%)                            |
| MEDICAGO SATIVA                 | 0                 | 1 (<1%)                     | 0                                  |
| METHIONINE                      | 0                 | 1 (<1%)                     | 0                                  |
| METHYLTHIONINIUM CHLORIDE       | 1 (1%)            | 0                           | 0                                  |
| NALOXONE HYDROCHLORIDE          | 0                 | 0                           | 1 (<1%)                            |
| OENOTHERA BIENNIS OIL           | 0                 | 0                           | 1 (<1%)                            |
| OXYGEN                          | 0                 | 0                           | 1 (<1%)                            |
| PHYTOSTEROL (NOS)               | 1 (1%)            | 0                           | 0                                  |
| SOYA LECITHIN                   | 0                 | 1 (<1%)                     | 0                                  |
| VITIS VINIFERA EXTRACT          | 0                 | 0                           | 1 (<1%)                            |
| ZEA MAYS                        | 0                 | 1 (<1%)                     | 0                                  |
| ANTIINFECTIVES FOR SYSTEMIC USE |                   |                             |                                    |
| Any medication                  | 4 (5%)            | 6 (4%)                      | 8 (6%)                             |
| AMOXICILLIN                     | 1 (1%)            | 2 (1%)                      | 0                                  |
| ACYCLOVIR                       | 0                 | 1 (<1%)                     | 1 (<1%)                            |
| METRONIDAZOLE                   | 1 (1%)            | 1 (<1%)                     | 0                                  |
| TETRACYCLINE                    | 1 (1%)            | 0                           | 1 (<1%)                            |
| AMOXICILLIN TRIHYDRATE          | 1 (1%)            | 0                           | 0                                  |
| AZITHROMYCIN                    | 0                 | 0                           | 1 (<1%)                            |

Note: A medication may be included in more than one ATC Level category and appear more than once.  
 Note: The following ingredient terms, which do not have associated ATC Level 1 terms, were also used during Post-Treatment with the following frequencies: Bovine Prostate: SAL 50mcg-1 subject, <1%, Capsicum Annum: SAL 50mcg-1 subject, <1%, Dextroamphetamine Saccharate: Placebo-1 subject, 1%, Lactoperoxidase: Placebo-1 subject, 1%, and Zinc Arginate: SAL 50mcg-1 subject, <1%.  
 dln73797: /arenv/arprod/ccil18781\_gr33343/asq112989/final/drivers/cm\_t006\_noncopdpst.sas 24AUG2010 16:04

169

CONFIDENTIAL

ASQ112989

Protocol: ASQ112989  
Population: Modified Intent-to-treat

Page 21 of 22

Table 1.25  
Summary of Non-COPD Medications Taken Post-Treatment

| ATC Level 1<br>Ingredient                     | Placebo<br>(N=75) | SAL 50mcg<br>BID<br>(N=151) | FSC<br>250/50mcg<br>BID<br>(N=139) |
|-----------------------------------------------|-------------------|-----------------------------|------------------------------------|
| BENZYPENICILLIN                               | 0                 | 0                           | 1 (<1%)                            |
| CLAVULANATE POTASSIUM                         | 1 (1%)            | 0                           | 0                                  |
| CLINDAMYCIN                                   | 0                 | 1 (<1%)                     | 0                                  |
| DOXYCYCLINE                                   | 0                 | 1 (<1%)                     | 0                                  |
| EFAVIRENZ                                     | 0                 | 1 (<1%)                     | 0                                  |
| EMTRICITABINE                                 | 0                 | 1 (<1%)                     | 0                                  |
| IMMUNOGLOBULINS NOS                           | 0                 | 0                           | 1 (<1%)                            |
| KETOCONAZOLE                                  | 0                 | 0                           | 1 (<1%)                            |
| LEVOFLOXACIN                                  | 0                 | 1 (<1%)                     | 0                                  |
| LYSOZYME                                      | 1 (1%)            | 0                           | 0                                  |
| METHENAMINE                                   | 1 (1%)            | 0                           | 0                                  |
| TENOFOVIR DISOPROXIL<br>FUMARATE              | 0                 | 1 (<1%)                     | 0                                  |
| TETANUS TOXOID                                | 0                 | 0                           | 1 (<1%)                            |
| VALACICLOVIR HYDROCHLORIDE                    | 0                 | 0                           | 1 (<1%)                            |
| ANTINEOPLASTIC AND<br>IMMUNOMODULATING AGENTS |                   |                             |                                    |
| Any medication                                | 2 (3%)            | 4 (3%)                      | 6 (4%)                             |
| ESTRADIOL                                     | 1 (1%)            | 2 (1%)                      | 1 (<1%)                            |
| ESTROGENS CONJUGATED                          | 0                 | 0                           | 2 (1%)                             |
| TAMOXIFEN                                     | 0                 | 1 (<1%)                     | 1 (<1%)                            |
| BEVACIZUMAB                                   | 0                 | 0                           | 1 (<1%)                            |
| CICLOSPORIN                                   | 0                 | 1 (<1%)                     | 0                                  |
| INTERFERON BETA                               | 0                 | 0                           | 1 (<1%)                            |
| RALOXIFENE HYDROCHLORIDE                      | 1 (1%)            | 0                           | 0                                  |

Note: A medication may be included in more than one ATC Level category and appear more than once.

Note: The following ingredient terms, which do not have associated ATC Level 1 terms, were also used during Post-Treatment with the following frequencies: Bovine Prostate: SAL 50mcg-1 subject, <1%, Capsicum Annuum: SAL 50mcg-1 subject, <1%, Dextroamphetamine Saccharate: Placebo-1 subject, 1%, Lactoperoxidase: Placebo-1 subject, 1%, and Zinc Arginate: SAL 50mcg-1 subject, <1%.

dln73797: /arenv/arprod/ccil18781\_gr33343/asq112989/final/drivers/cm\_t006\_noncopdpst.sas 24AUG2010 16:04

170

CONFIDENTIAL

ASQ112989

Protocol: ASQ112989  
 Population: Modified Intent-to-treat

Page 22 of 22

Table 1.25  
 Summary of Non-COPD Medications Taken Post-Treatment

| ATC Level 1<br>Ingredient                              | Placebo<br>(N=75) | SAL 50mcg<br>BID<br>(N=151) | FSC<br>250/50mcg<br>BID<br>(N=139) |
|--------------------------------------------------------|-------------------|-----------------------------|------------------------------------|
| ANTIPARASITIC PRODUCTS,<br>INSECTICIDES AND REPELLENTS |                   |                             |                                    |
| Any medication                                         | 1 (1%)            | 1 (<1%)                     | 0                                  |
| METRONIDAZOLE                                          | 1 (1%)            | 1 (<1%)                     | 0                                  |

171

CONFIDENTIAL

ASQ112989

Note: A medication may be included in more than one ATC Level category and appear more than once.  
 Note: The following ingredient terms, which do not have associated ATC Level 1 terms, were also used during Post-Treatment with the following frequencies: Bovine Prostate: SAL 50mcg-1 subject, <1%, Capsicum Annum: SAL 50mcg-1 subject, <1%, Dextroamphetamine Saccharate: Placebo-1 subject, 1%, Lactoperoxidase: Placebo-1 subject, 1%, and Zinc Arginate: SAL 50mcg-1 subject, <1%.  
 dln73797: /arenv/arprod/ccil8781\_gr33343/asq112989/final/drivers/cm\_t006\_noncopdpst.sas 24AUG2010 16:04

Protocol: ASQ112989  
Population: Modified Intent-to-treat

Page 1 of 1

Table 1.26  
Summary of Treatment Compliance

| Compliance (%) | Placebo<br>(N=75) | SAL 50mcg BID<br>(N=151) | FSC 250/50mcg<br>BID<br>(N=139) | Total<br>(N=365) |
|----------------|-------------------|--------------------------|---------------------------------|------------------|
| n              | 74                | 141                      | 132                             | 347              |
| Mean           | 101.1             | 96.4                     | 93.6                            | 96.3             |
| SD             | 54.81             | 16.57                    | 16.41                           | 29.23            |
| Median         | 97.0              | 98.8                     | 97.0                            | 97.7             |
| Min.           | 39                | 24                       | 13                              | 13               |
| Max.           | 545               | 150                      | 140                             | 545              |
| <80%           | 11 (15%)          | 13 (9%)                  | 20 (15%)                        | 44 (13%)         |
| >=80% to <100% | 31 (42%)          | 60 (43%)                 | 56 (42%)                        | 147 (42%)        |
| 100%           | 20 (27%)          | 35 (25%)                 | 38 (29%)                        | 93 (27%)         |
| >100% to <110% | 4 (5%)            | 21 (15%)                 | 9 (7%)                          | 34 (10%)         |
| >=110%         | 8 (11%)           | 12 (9%)                  | 9 (7%)                          | 29 (8%)          |

Note: Percentage compliance is calculated as  
(number of doses taken)/(2x (number of days in treatment period))x100  
dln73797: /arenv/arprod/ccil8781\_gr33343/asq112989/final/drivers/cp\_t001\_sum.sas 27JUL2010 20:14

1  
2  
3  
4  
5  
6  
7  
8  
9  
10  
11  
12  
13  
14  
15  
16  
17  
18  
19  
20  
21  
22  
23  
24  
25  
26  
27  
28  
29  
30  
31  
32  
33  
34  
35  
36  
37  
38  
39  
40  
41  
42  
43  
44  
45  
46  
47  
48  
49

172

1  
2  
3  
4  
5 Protocol: ASQ112989  
6 Population: Modified Intent-to-treat

Page 1 of 1

7 Table 1.27  
8 Summary of Inhaler Malfunctions  
9

10  
11  
12  
13  
14  
15  
16  
17 No data to report  
18  
19

For peer review only

20  
21  
22 173  
23  
24  
25  
26  
27  
28  
29  
30  
31  
32  
33  
34  
35  
36  
37  
38  
39

CONFIDENTIAL

ASQ112989

40 dln73797: /arenv/arprod/ccil8781\_gr33343/asq112989/final/drivers/dv\_t001\_sum.sas 27JUL2010 20:12  
41  
42  
43  
44  
45

Protocol: ASQ112989  
Population: Run-in

Figure 2.01  
Scatter Plot of SOBDA Score at Run-in Week 2 vs Run-in Week 1 - Subjects with response of 'no change' on second weekly PGAC assessment (on the day of or prior to Visit 2)

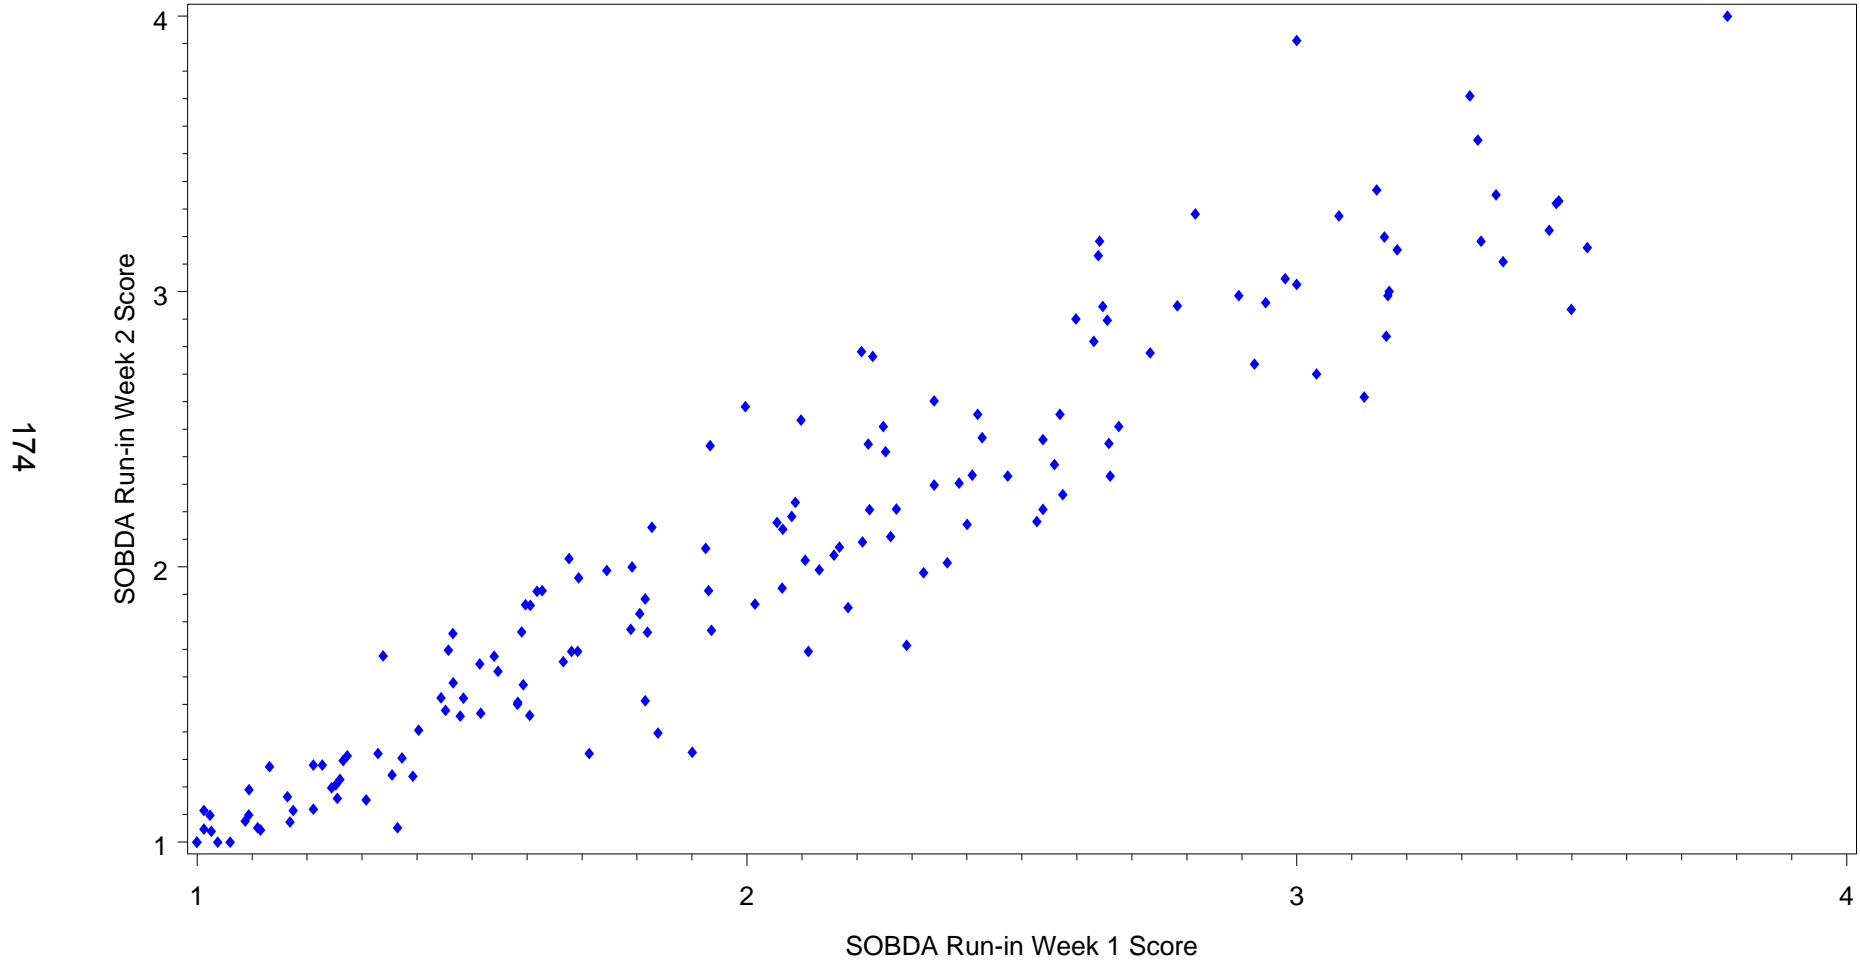

174

CONFIDENTIAL

ASQ112989

sam31676: /arenv/arprod/cci18781\_gr33343/asq112989/final/drivers/sobda\_f001f.sas 12OCT2011 16:25

Protocol: ASQ112989  
Population: Run-in

Figure 2.02  
Scatter Plot of SOBDA Baseline Score vs Physician-Completed mMRC Score at Visit 2

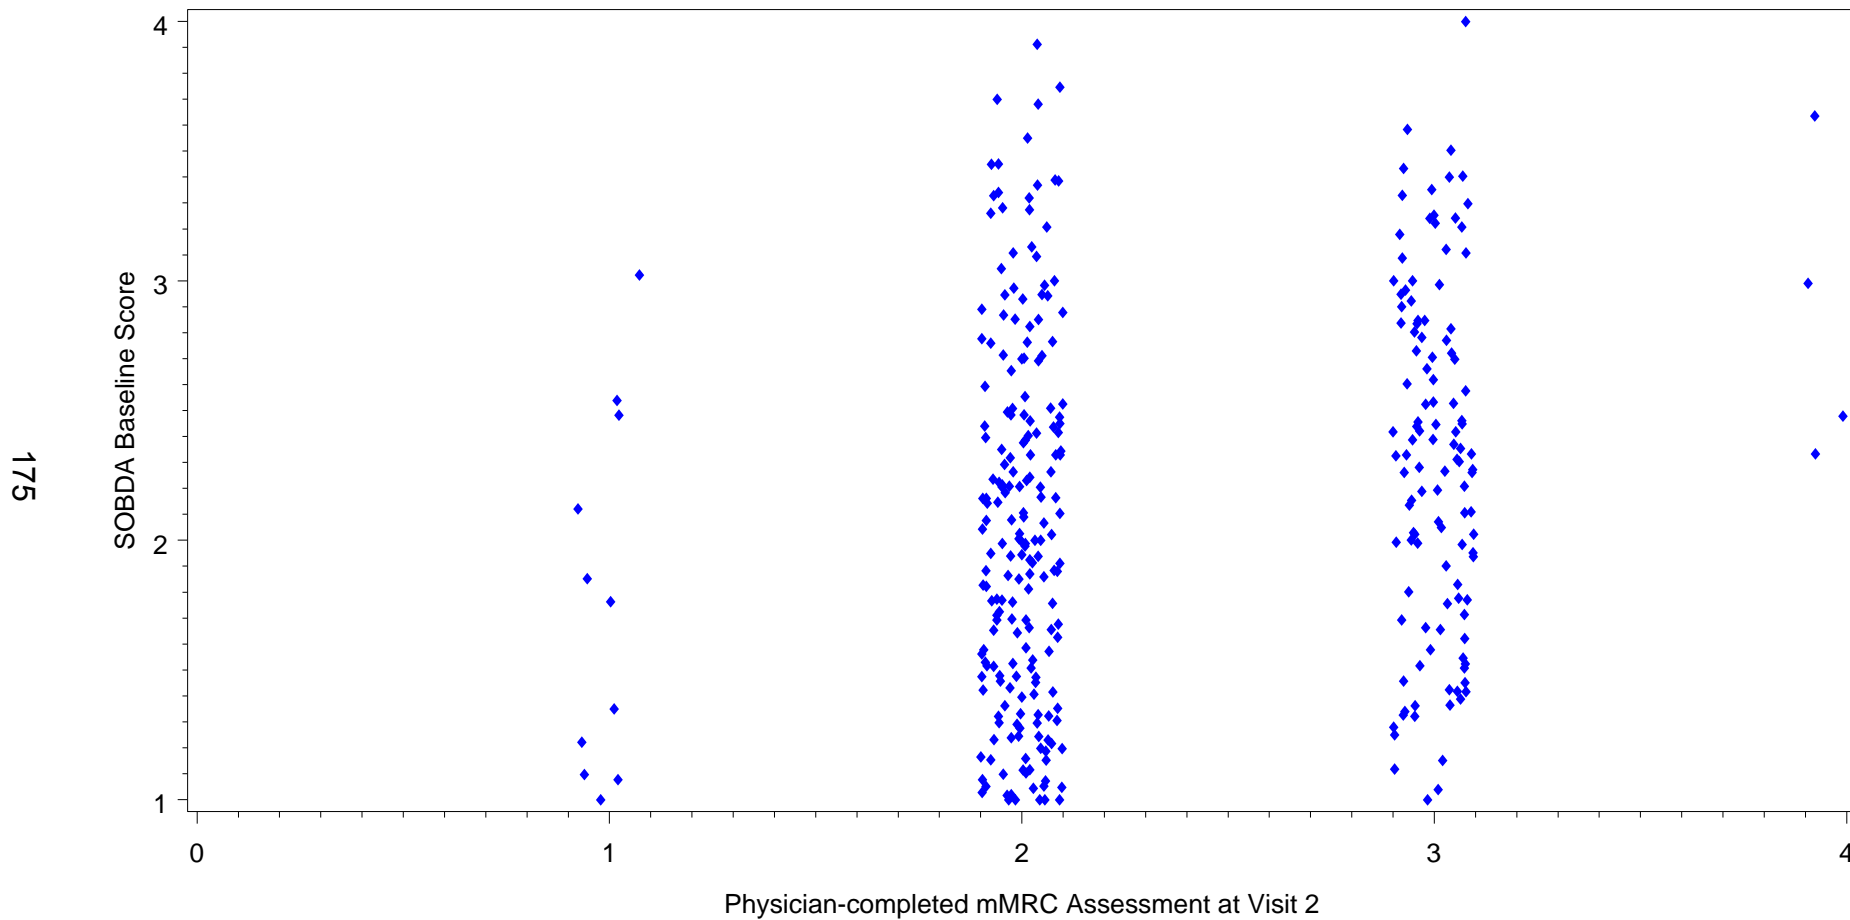

0 = Not troubled with breathlessness except with strenuous exercise; 1 = Troubled by shortness of breath when hurrying on level/walking up slight hill; 2 = Walks slower than others of same age on level b/c breathlessness; 3 = Stops to breathe after walking about 100 yards/meters or after few min on level; 4 = Too breathless to leave house or breathless when dressing or undressing  
sam31676: /arenv/arprod/cci18781\_gr33343/asq112989/final/drivers/sobda\_f002f.sas 12OCT2011 16:25

CONFIDENTIAL

ASQ112989

Protocol: ASQ112989  
Population: Run-in

Figure 2.03  
Scatter Plot of SOBDA Baseline Score vs Participant-Completed mMRC Score at Visit 2

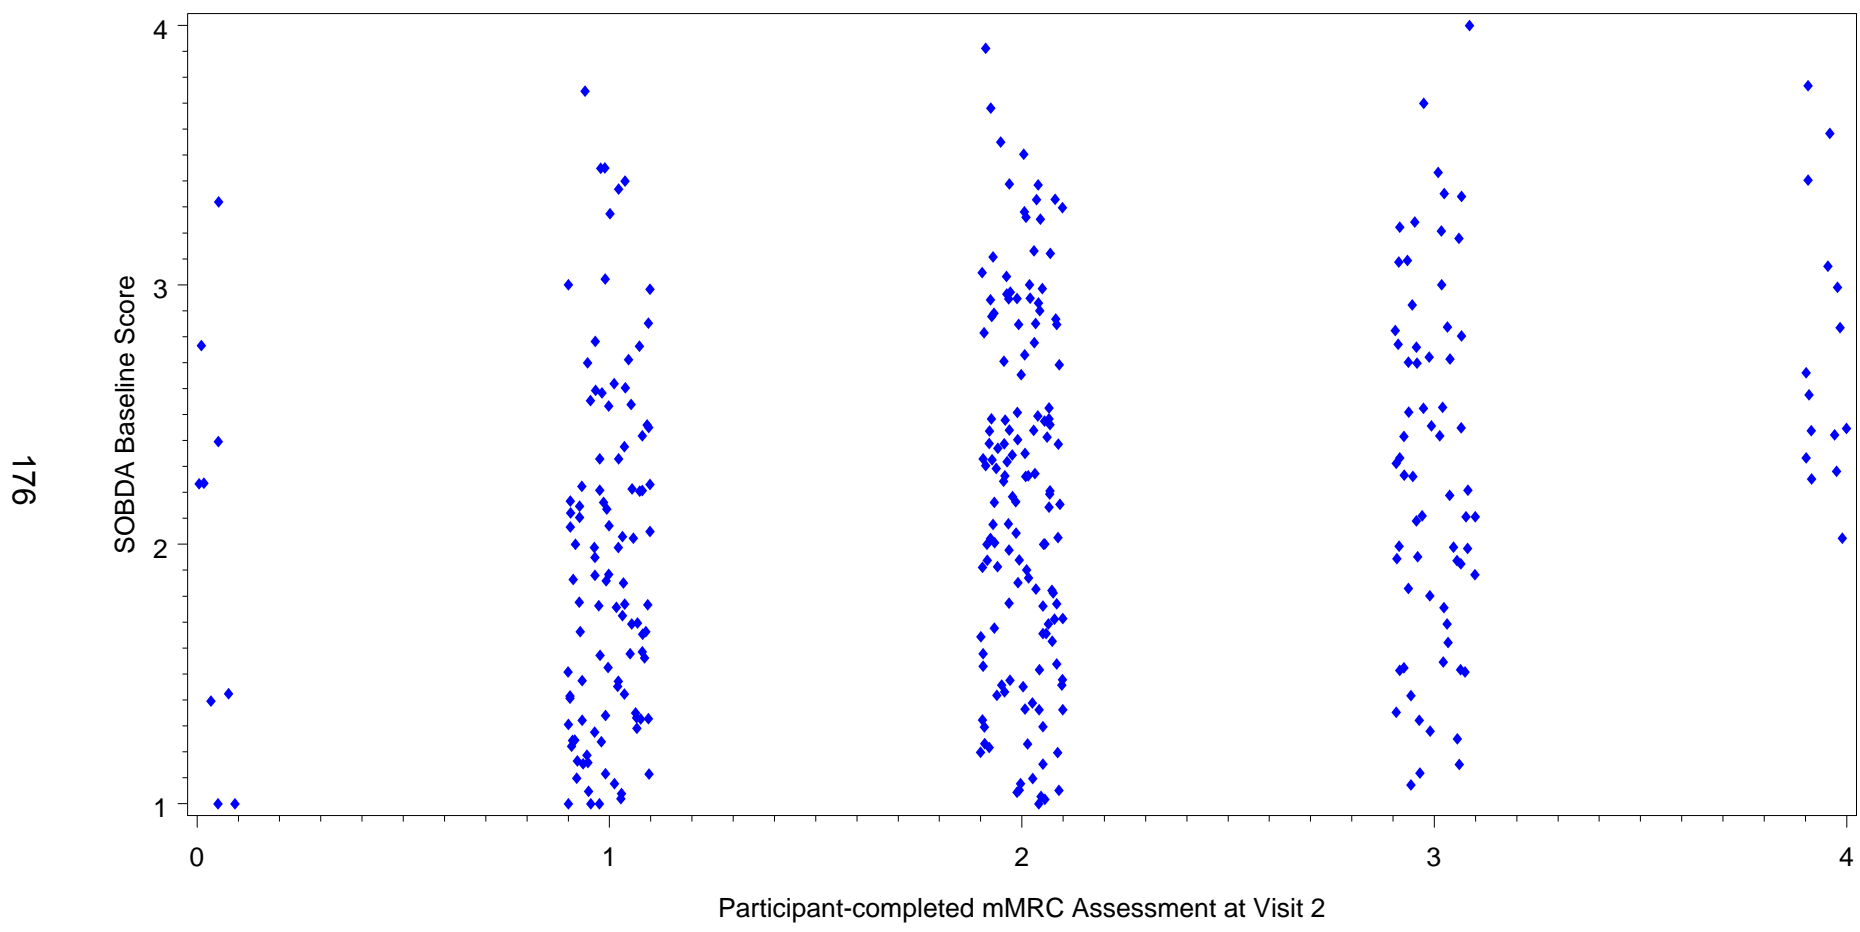

0 = Not troubled with breathlessness except with strenuous exercise; 1 = Troubled by shortness of breath when hurrying on level/walking up slight hill; 2 = Walks slower than others of same age on level b/c breathlessness; 3 = Stops to breathe after walking about 100 yards/meters or after few min on level; 4 = Too breathless to leave house or breathless when dressing or undressing

sam31676: /arenv/arprod/cci18781\_gr33343/asq112989/final/drivers/sobda\_f003f.sas 12OCT2011 16:25

CONFIDENTIAL

ASQ112989



Protocol: ASQ112989  
Population: Run-in

Figure 2.04  
Scatter Plot of SOBDA Baseline Score vs CRQ-SAS Dyspnoea Domain Score at Visit 2

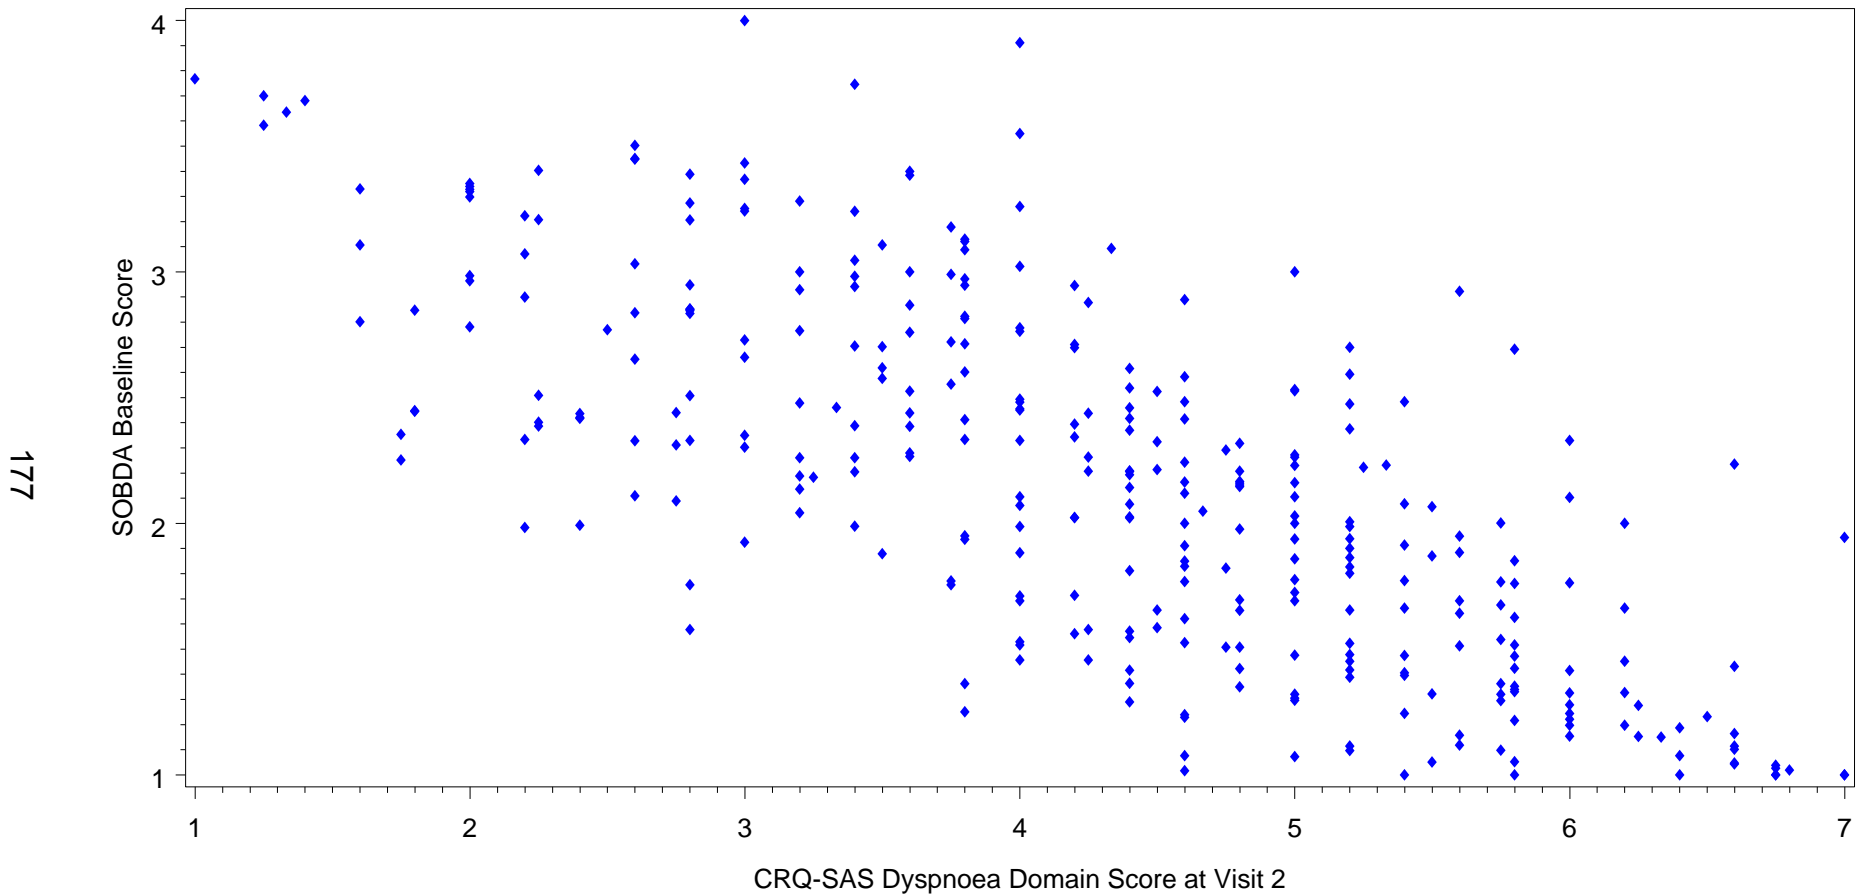

The CRQ-SAS dyspnoea domain score is the average of questions 1 - 'Feeling emotional, angry or upset'; 2 - 'Taking care of your basic needs'; 3 - 'Walking'; 4 - 'Performing household chores'; and 5 - 'Participate in social activities'. Responses to each question are coded as 1 = 'Extremely short of breath'; 2 = 'Very short of breath'; 3 = 'Quite a bit short of breath'; 4 = 'Moderate short of breath'; 5 = 'Some shortness of breath'; 6 = 'A little shortness of breath'; 7 = 'Not at all short of breath'.  
sam31676: /arenv/arprod/cci18781\_gr33343/asq112989/final/drivers/sobda\_f004f.sas 12OCT2011 16:25

CONFIDENTIAL

ASQ112989

Protocol: ASQ112989  
Population: Run-in

Figure 2.05  
Scatter Plot of SOBDA Baseline Score vs CGI-S Score at Visit 2

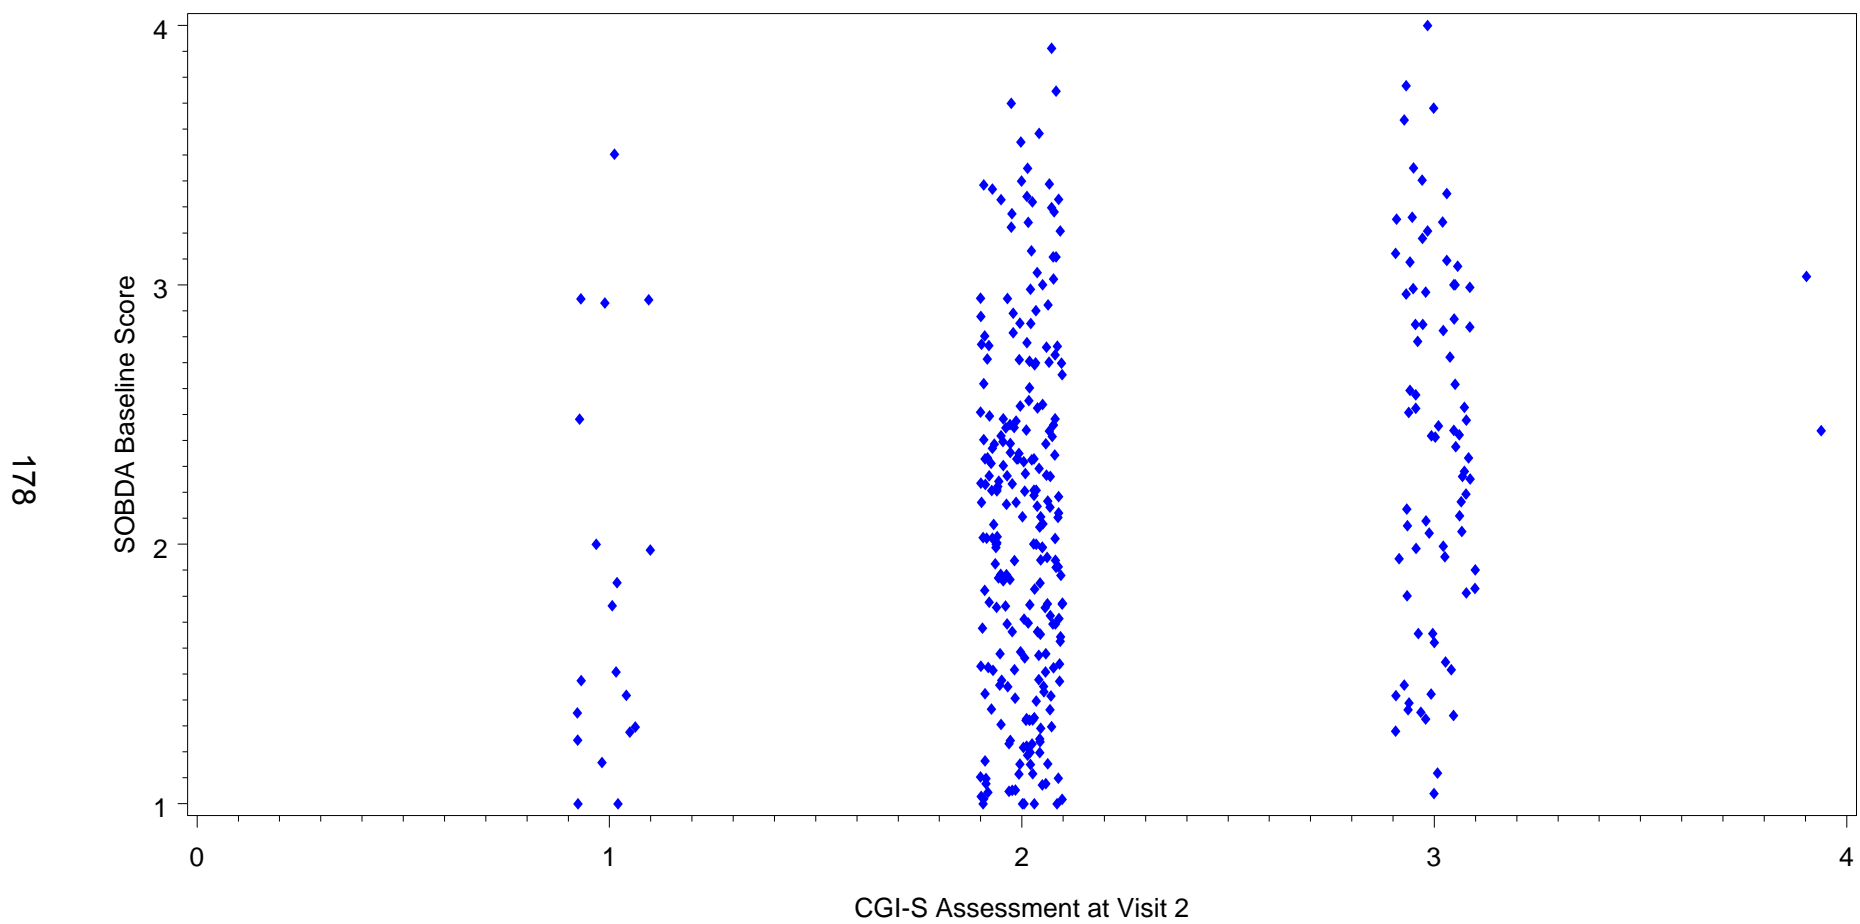

0 = Not troubled with breathlessness except with strenuous exercise; 1 = Troubled by shortness of breath when hurrying on level/walking up slight hill; 2 = Walks slower than others of same age on level b/c breathlessness; 3 = Stops to breathe after walking about 100 yards/meters or after few min on level; 4 = Too breathless to leave house or breathless when dressing or undressing  
 sam31676: /arenv/arprod/cci18781\_gr33343/asq112989/final/drivers/sobda\_f005f.sas 12OCT2011 16:25

CONFIDENTIAL

ASQ112989

Protocol: ASQ112989  
Population: Modified Intent-to-treat

Figure 2.06  
SOBDA Weekly Scores by CGI-C Response at Visit 3/PD

179

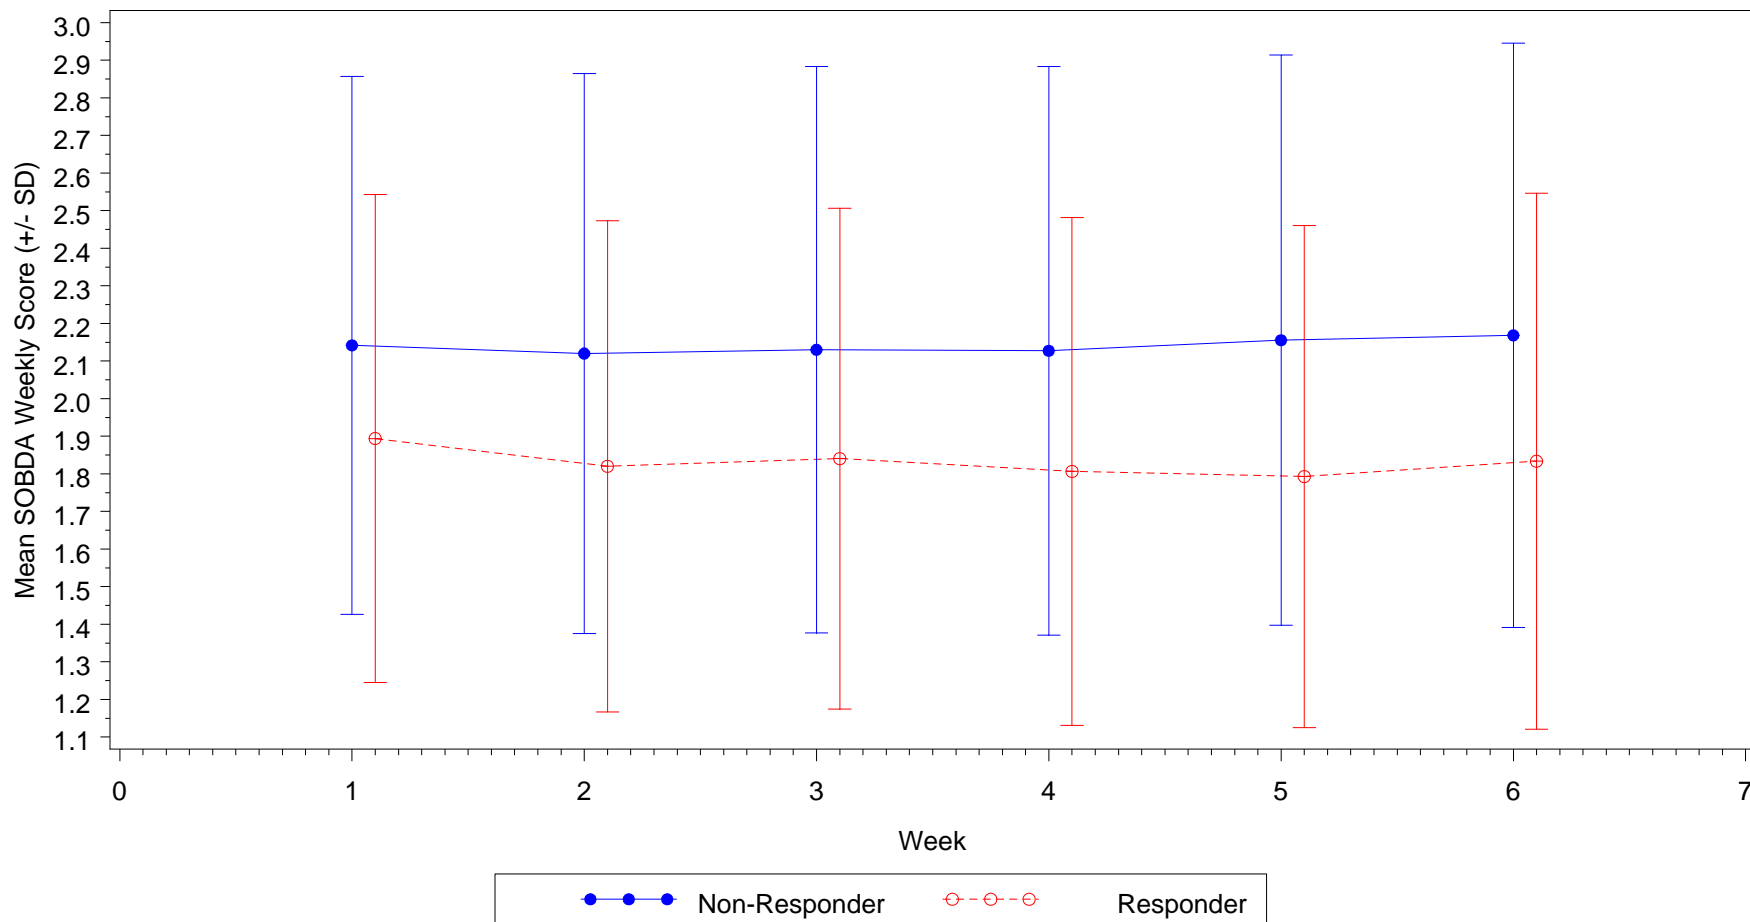

CGI-C responder is defined as a subject who had a response of "better" or "much better".  
A CGI-C non-responder is defined as a subject who had a response of "much worse", "worse" or "no change".  
sam31676: /arenv/arprod/cci18781\_gr33343/asq112989/final/drivers/sobda\_f006f.sas 12OCT2011 16:25

CONFIDENTIAL

ASQ112989

Protocol: ASQ112989  
Population: Modified Intent-to-treat

Figure 2.07  
SOBDA Weekly Scores by CRQ-SAS Dyspnoea Domain Response at Visit 3/PD

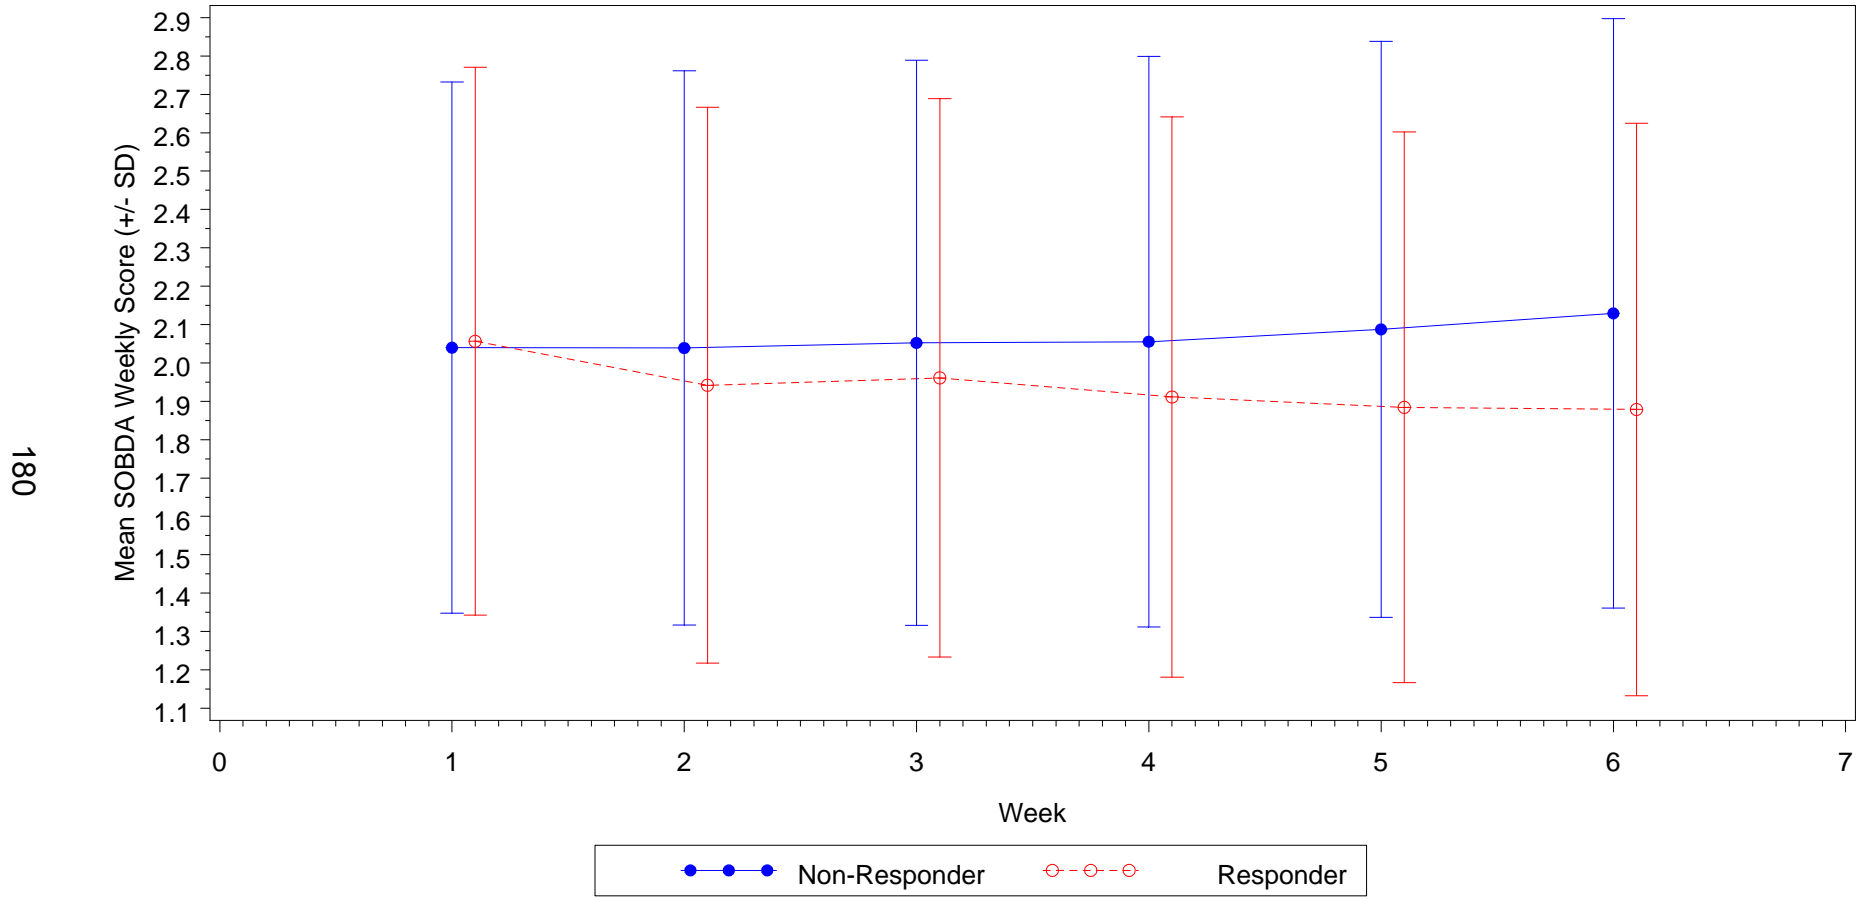

A CRQ-SAS dyspnoea domain responder is defined as a subject who had a change in score for the dyspnoea domain of the CRQ-SAS between Visit 2 and Visit 3/PD of 0.5 units or more. A CRQ-SAS dyspnoea domain non-responder is defined as a subject who had a change in score of less than 0.5 units.

sam31676: /arenv/arprod/cci18781\_gr33343/asq112989/final/drivers/sobda\_f007f.sas 12OCT2011 16:25

CONFIDENTIAL

ASQ112989

Protocol: ASQ112989  
Population: Modified Intent-to-treat

Figure 2.08  
SOBDA Weekly Scores by Physician-Completed mMRC Response at Visit 3/PD

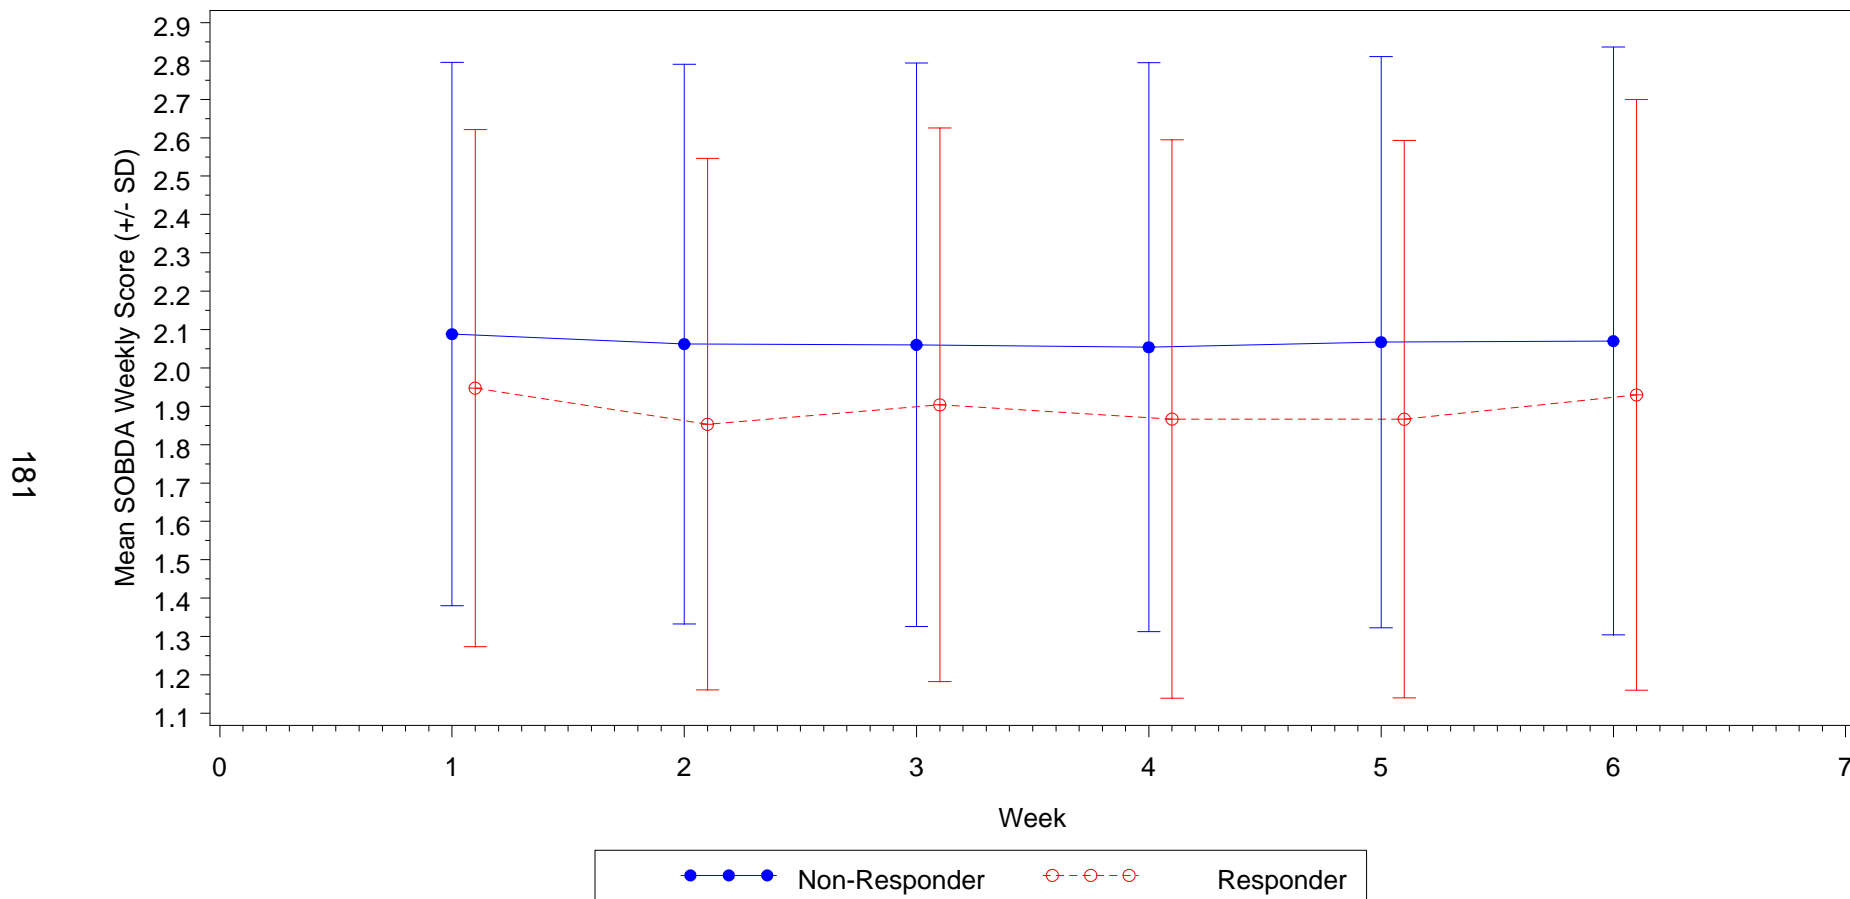

A physician-completed mMRC responder is defined as a subject who had a change in score between Visit 2 and Visit 3/PD of 1 unit or more. A physician-completed mMRC non-responder is defined as a subject who had a change of less than 1 unit.  
sam31676: /arenv/arprod/cc18781\_gr33343/asq112989/final/drivers/sobda\_f008f.sas 12OCT2011 16:25

CONFIDENTIAL

ASQ112989

Protocol: ASQ112989  
Population: Modified Intent-to-treat

Figure 2.09  
SOBDA Weekly Scores by Participant-Completed mMRC Response at Visit 3/PD

182

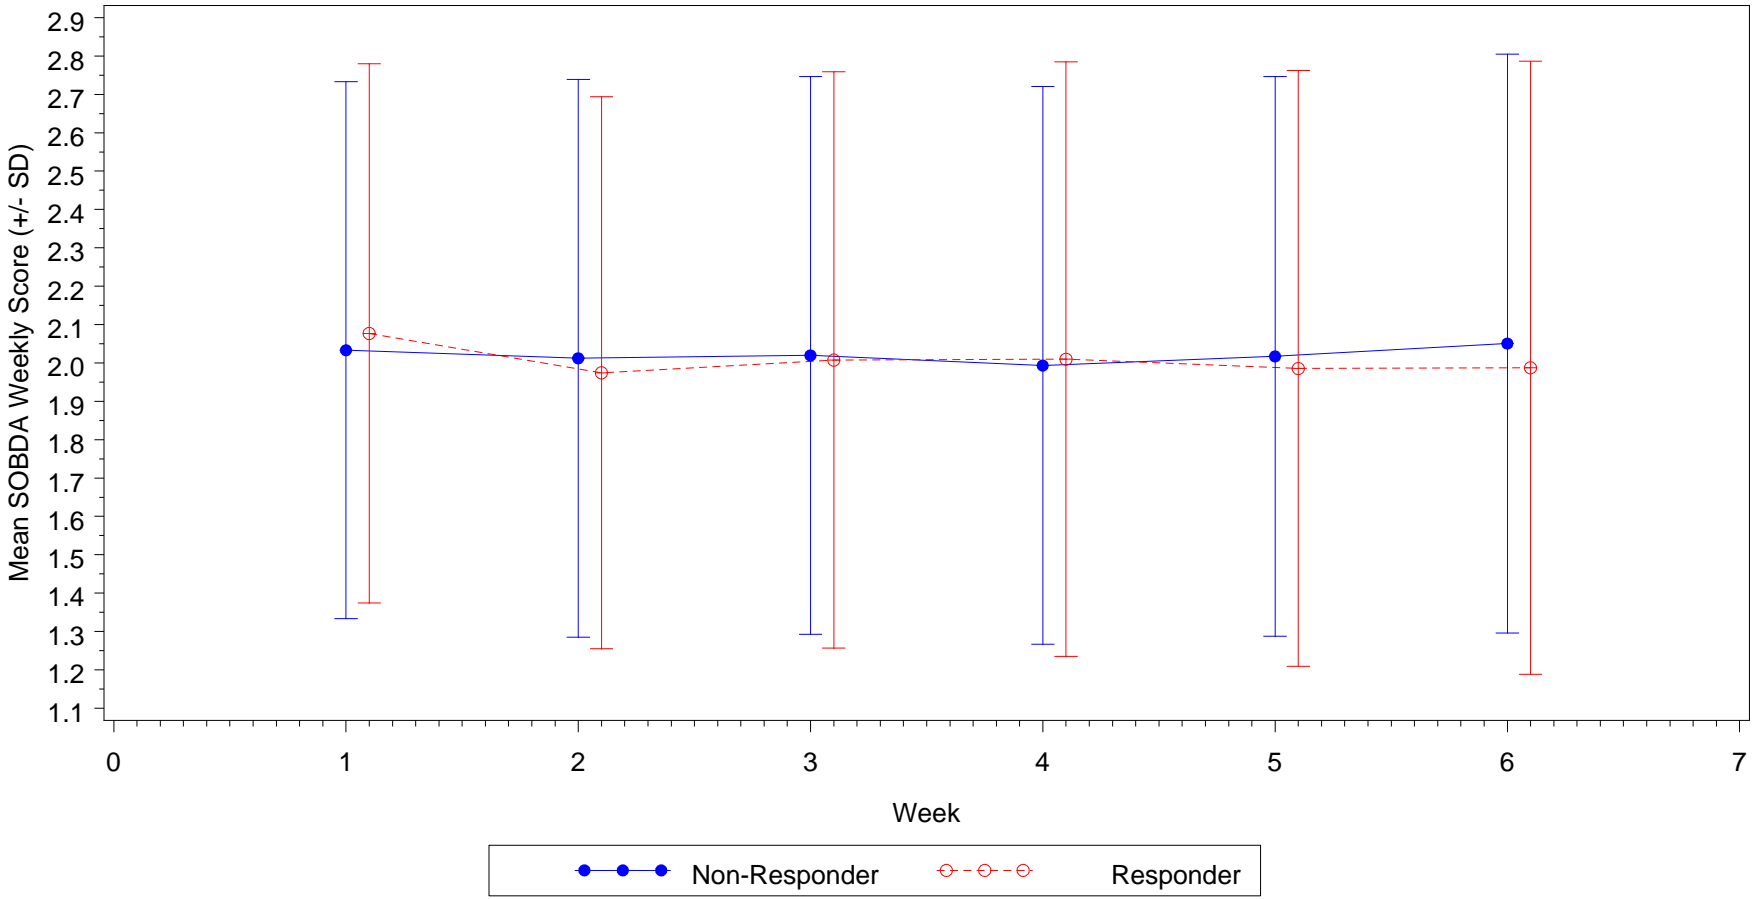

A participant-completed mMRC responder is defined as a subject who had a change in score between Visit 2 and Visit 3/PD of 1 unit or more. A participant-completed mMRC non-responder is defined as a subject who had a change of less than 1 unit.

sam31676: /arenv/arprod/cci18781\_gr33343/asq112989/final/drivers/sobda\_f009f.sas 12OCT2011 16:25

CONFIDENTIAL

ASQ112989

Protocol: ASQ112989  
Population: Modified Intent-to-treat

Figure 2.10  
Cumulative Distribution Plot of Change from Baseline to Week 1 SOBDA Score by PGAC Response Categories at Study Day 8

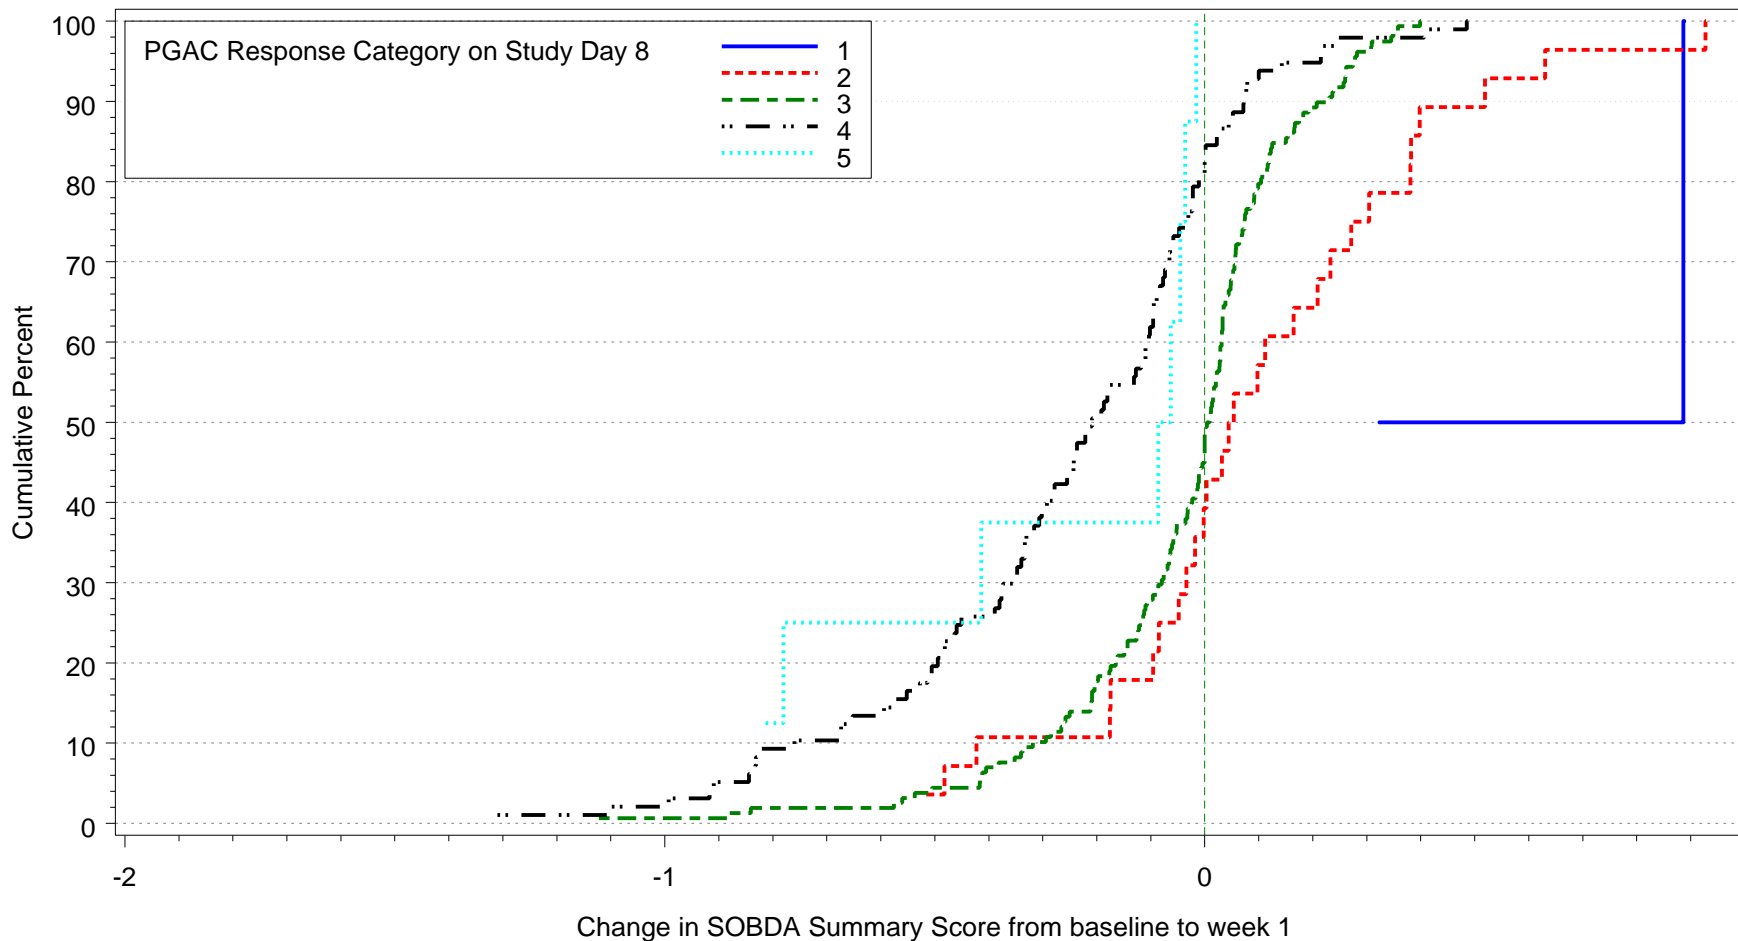

PGAC response categories: 1 = "Much worse"; 2 = "Worse"; 3 = "No change"; 4 = "Better"; 5 = "Much better"  
sam31676: /arenv/arprod/cc18781\_gr33343/asq112989/final/drivers/sobda\_f010f.sas 12OCT2011 16:25

183

1  
2  
3  
4  
5  
6  
7  
8  
9  
10  
11  
12  
13  
14  
15  
16  
17  
18  
19  
20  
21  
22  
23  
24  
25  
26  
27  
28  
29  
30  
31  
32  
33  
34  
35  
36  
37  
38  
39  
40  
41  
42  
43  
44  
45  
46  
47  
48  
49

Protocol: ASQ112989  
Population: Modified Intent-to-treat

Figure 2.11  
Cumulative Distribution Plot of Change from Week 1 to Week 2 SOBDA Score by PGAC Response Categories at Study Day 15

184

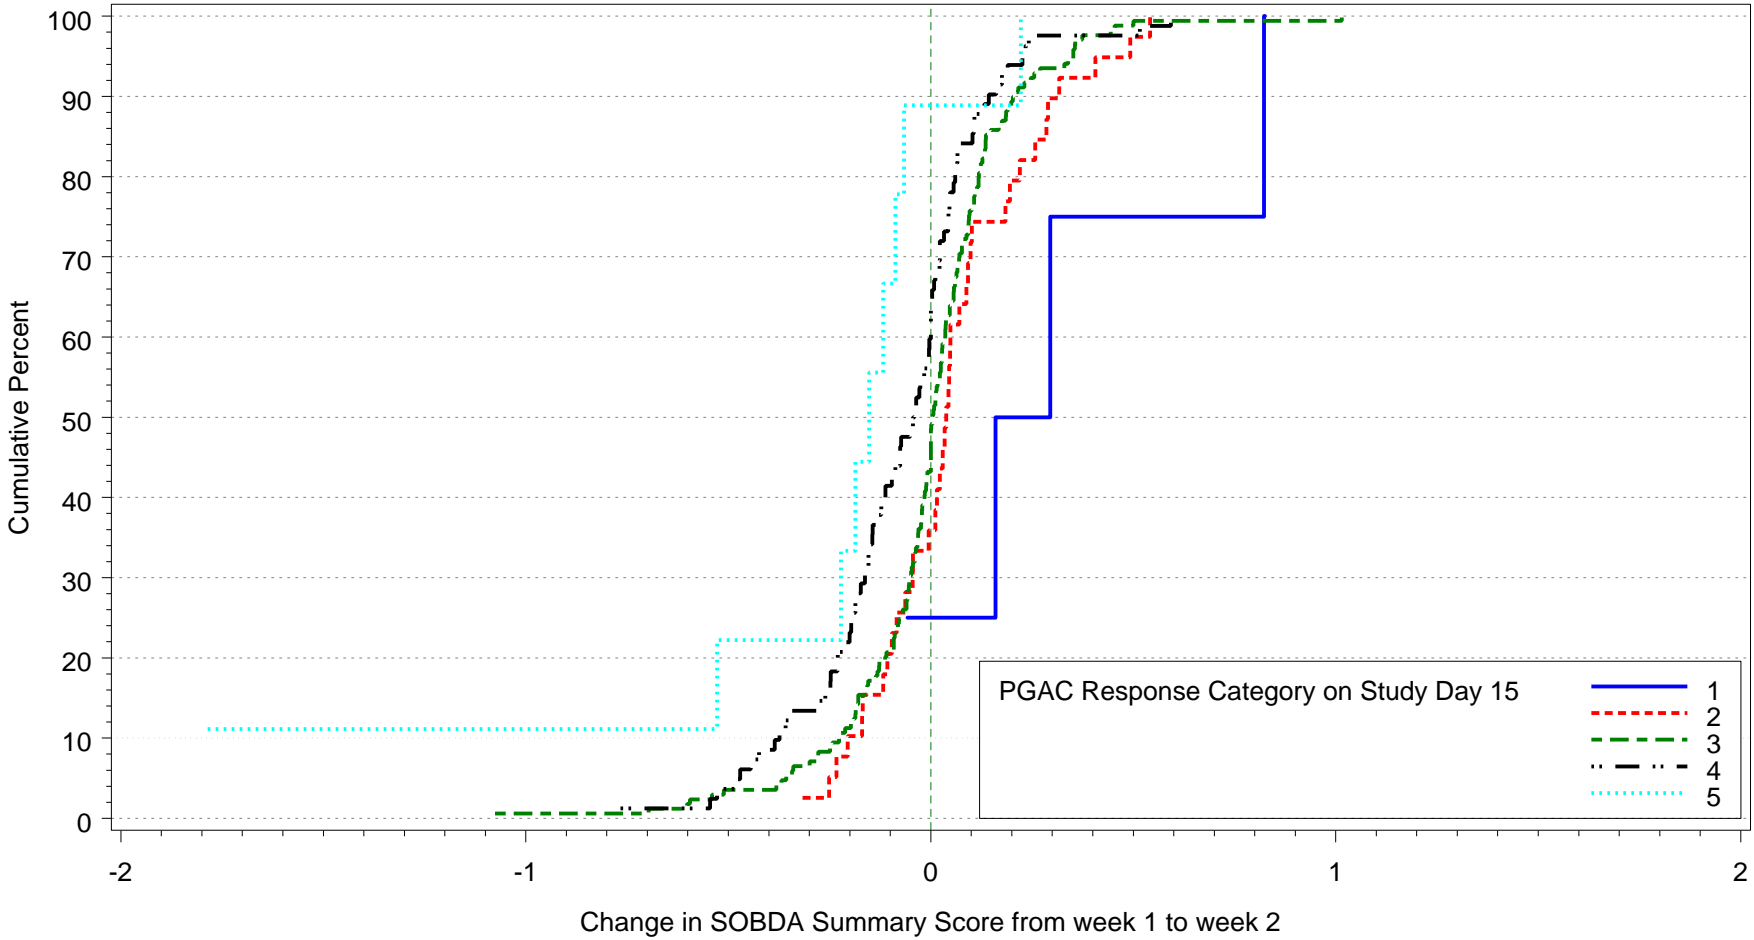

PGAC response categories: 1 = "Much worse"; 2 = "Worse"; 3 = "No change"; 4 = "Better"; 5 = "Much better"  
sam31676: /arenv/arprod/cci18781\_gr33343/asq112989/final/drivers/sobda\_f011f.sas 12OCT2011 16:25

CONFIDENTIAL

ASQ112989



Protocol: ASQ112989  
Population: Modified Intent-to-treat

Figure 2.12  
Cumulative Distribution Plot of Change from Week 2 to Week 3 SOBDA Score by PGAC Response Categories at Study Day 22

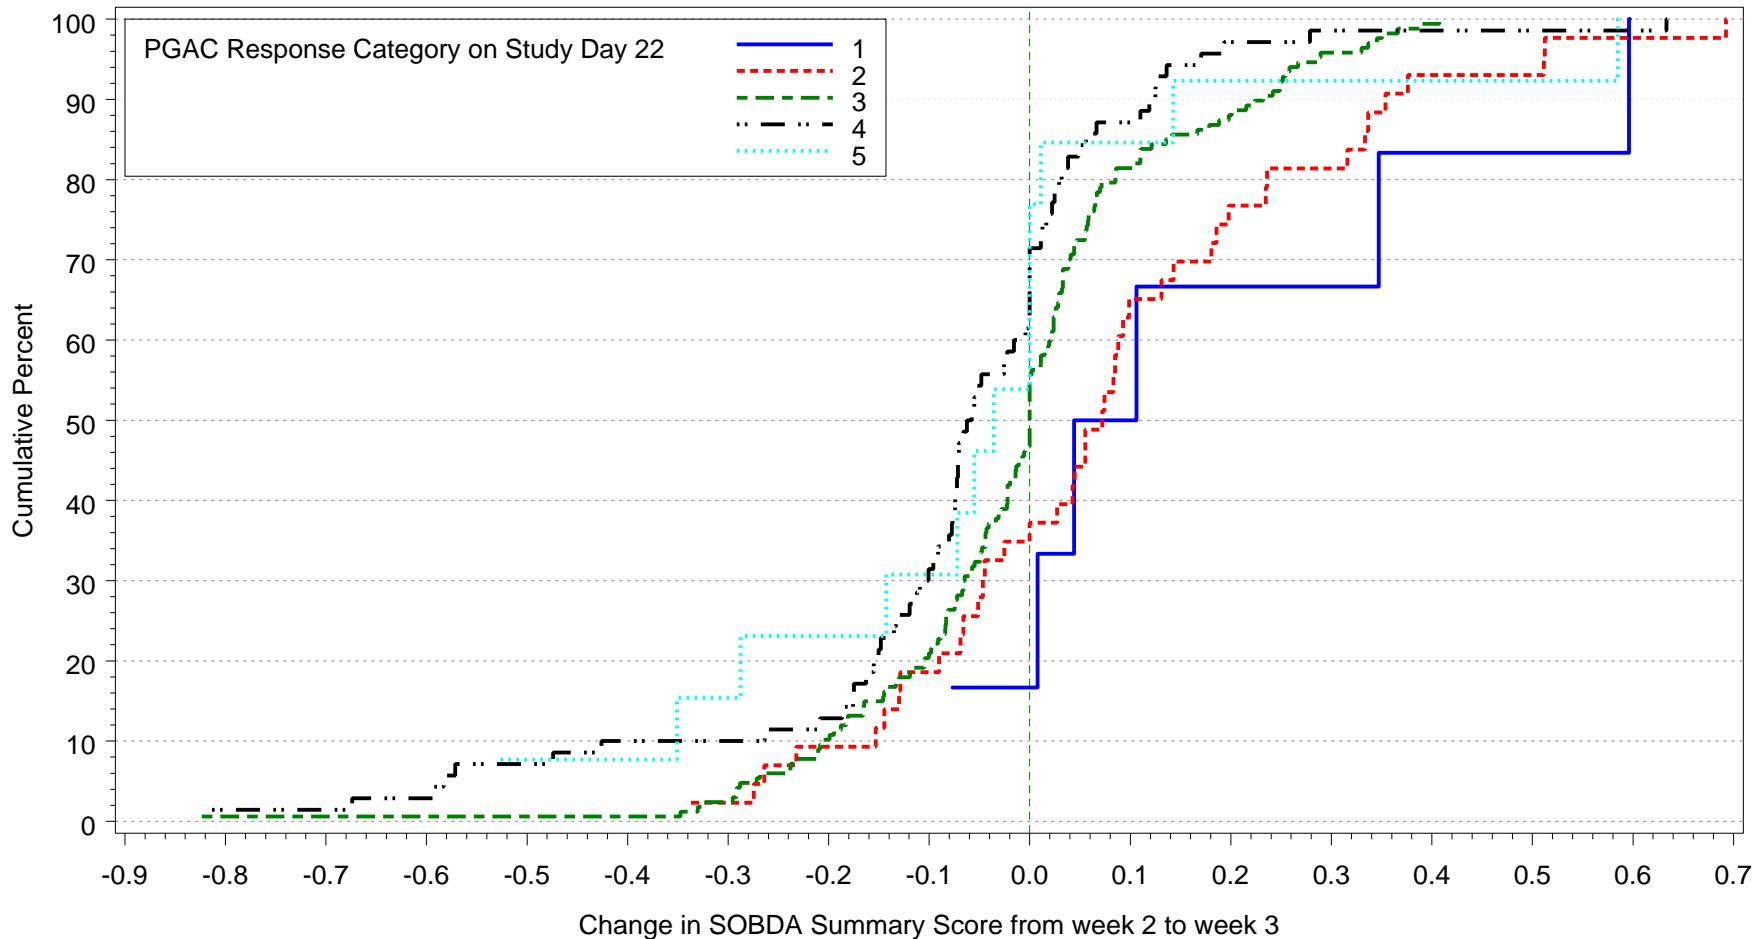

185

PGAC response categories: 1 = "Much worse"; 2 = "Worse"; 3 = "No change"; 4 = "Better"; 5 = "Much better"  
sam31676: /arenv/arprod/cc18781\_gr33343/asq112989/final/drivers/sobda\_f012f.sas 12OCT2011 16:25

CONFIDENTIAL

ASQ112989

Protocol: ASQ112989  
Population: Modified Intent-to-treat

Figure 2.13  
Cumulative Distribution Plot of Change from Week 3 to Week 4 SOBDA Score by PGAC Response Categories at Study Day 29

186

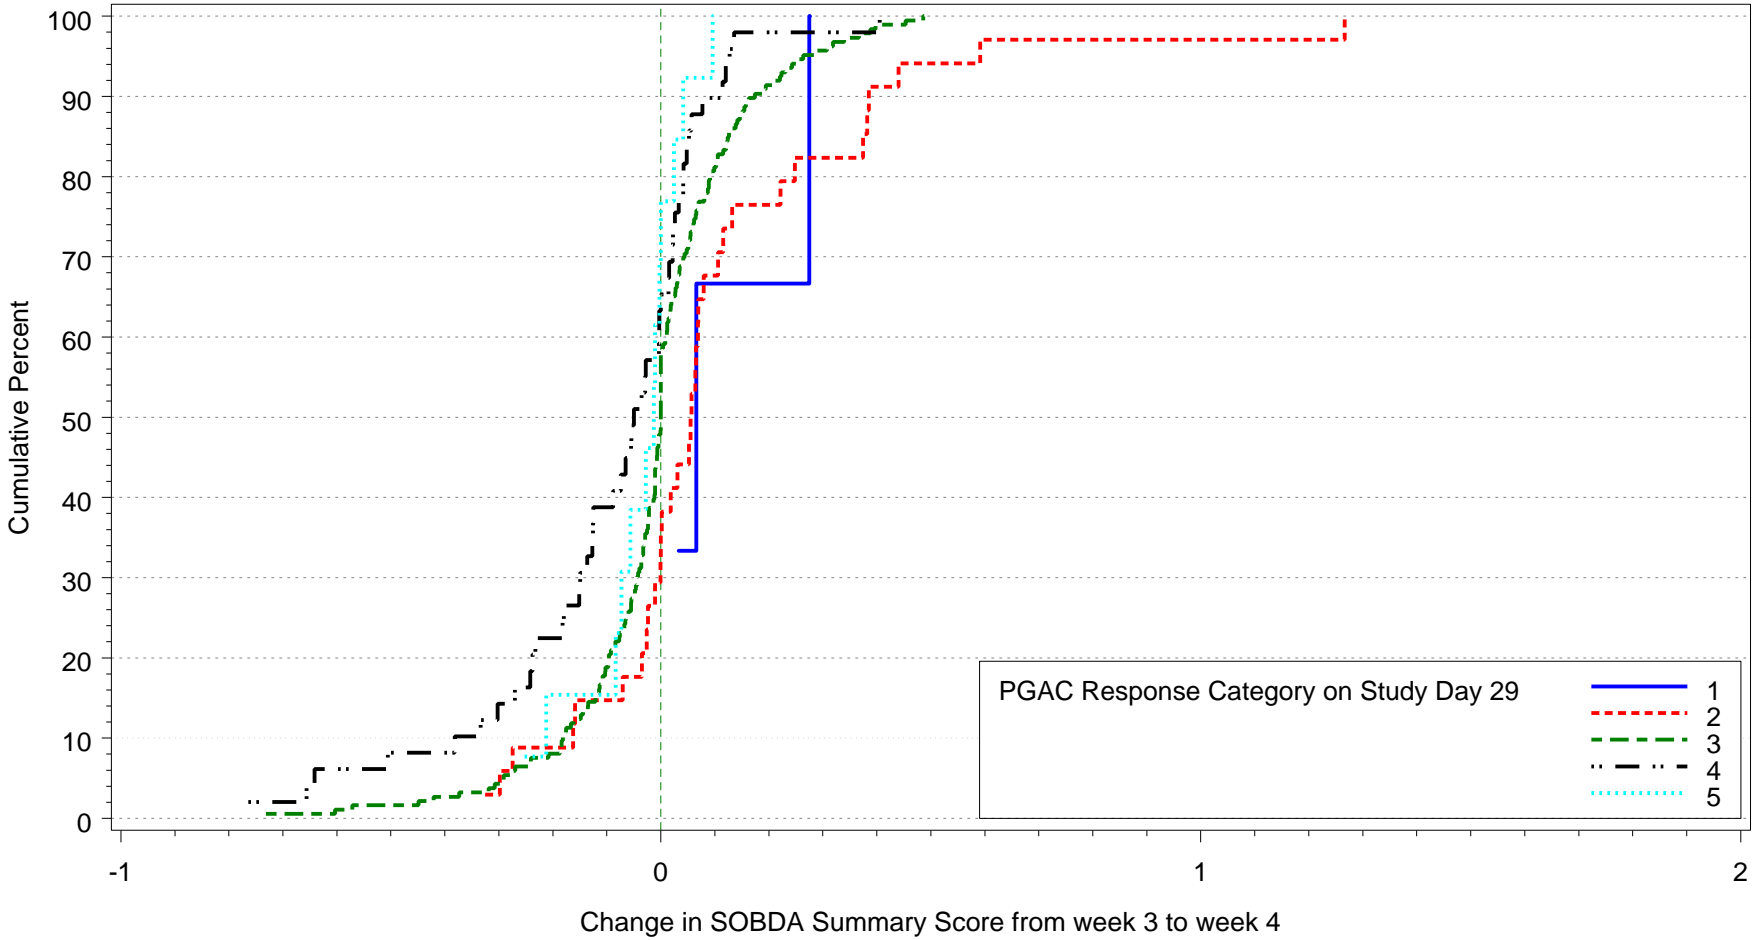

PGAC response categories: 1 = "Much worse"; 2 = "Worse"; 3 = "No change"; 4 = "Better"; 5 = "Much better"  
sam31676: /arenv/arprod/cc18781\_gr33343/asq112989/final/drivers/sobda\_f013f.sas 12OCT2011 16:25

CONFIDENTIAL

ASQ112989

Protocol: ASQ112989  
Population: Modified Intent-to-treat

Figure 2.14  
Cumulative Distribution Plot of Change from Week 4 to Week 5 SOBDA Score by PGAC Response Categories at Study Day 36

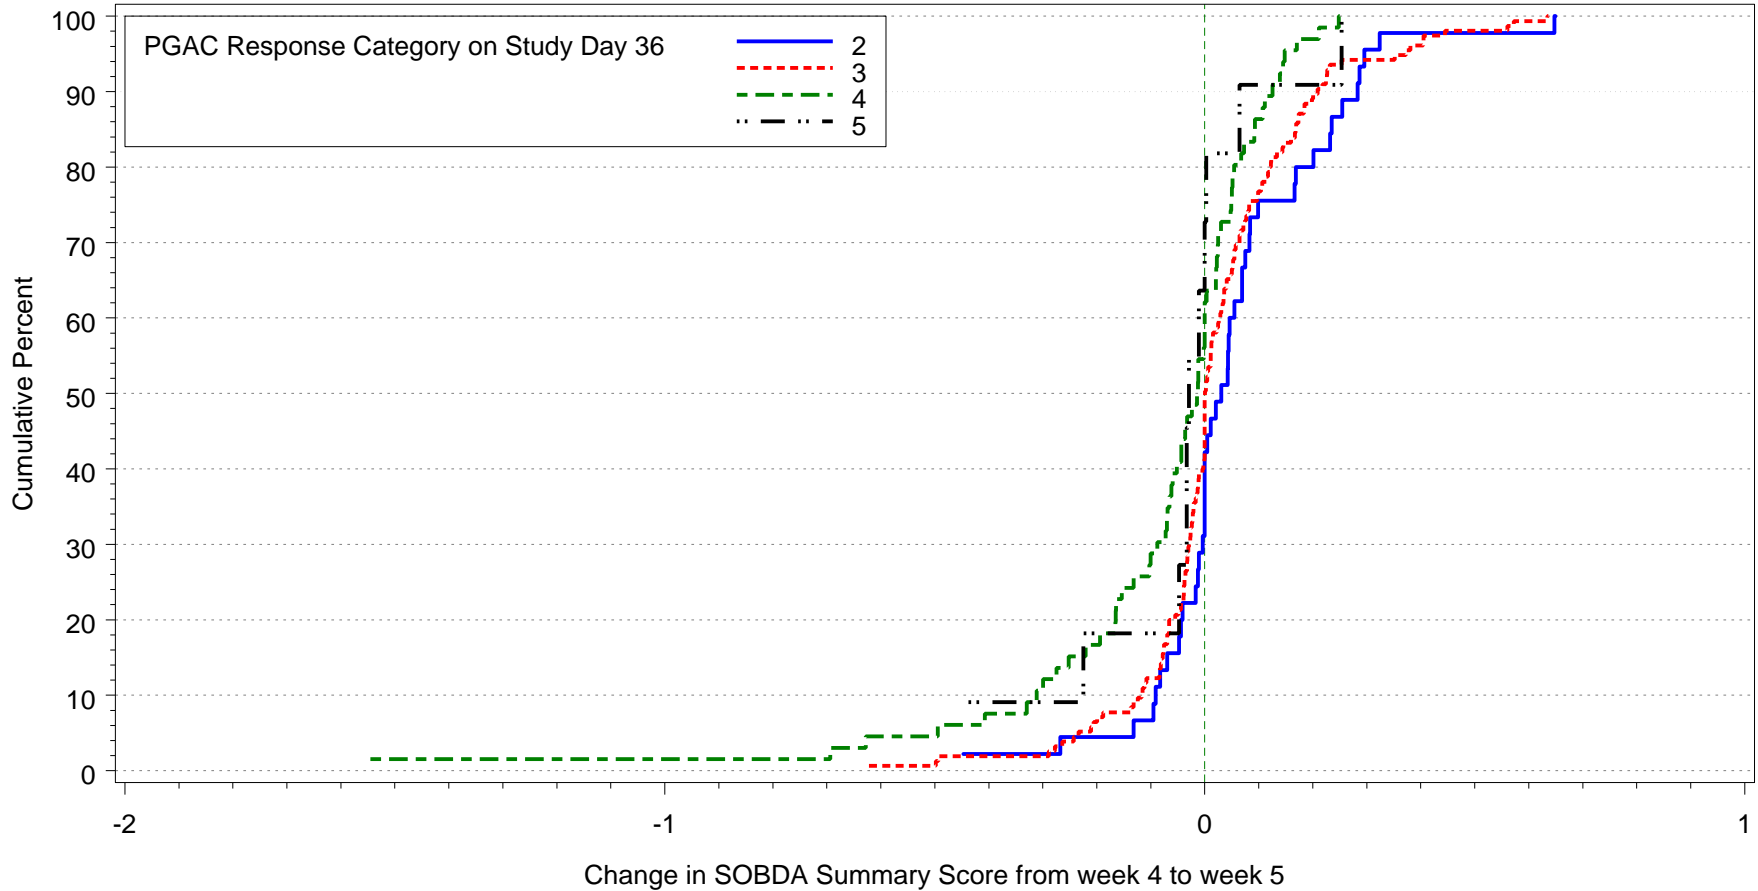

PGAC response categories: 1 = "Much worse"; 2 = "Worse"; 3 = "No change"; 4 = "Better"; 5 = "Much better"  
Note: No subjects were in the 'Much worse' category at this time point so the line colours for each category are different to those for the same category on figures at other time points.  
sam31676: /arenv/arprod/cc18781\_gr33343/asq112989/final/drivers/sobda\_f014f.sas 12OCT2011 16:25

187

CONFIDENTIAL

ASQ112989

Protocol: ASQ112989  
Population: Modified Intent-to-treat

Figure 2.15  
Cumulative Distribution Plot of Change from Week 5 to Week 6 SOBDA Score by PGAC Response Categories at Study Day 43

188

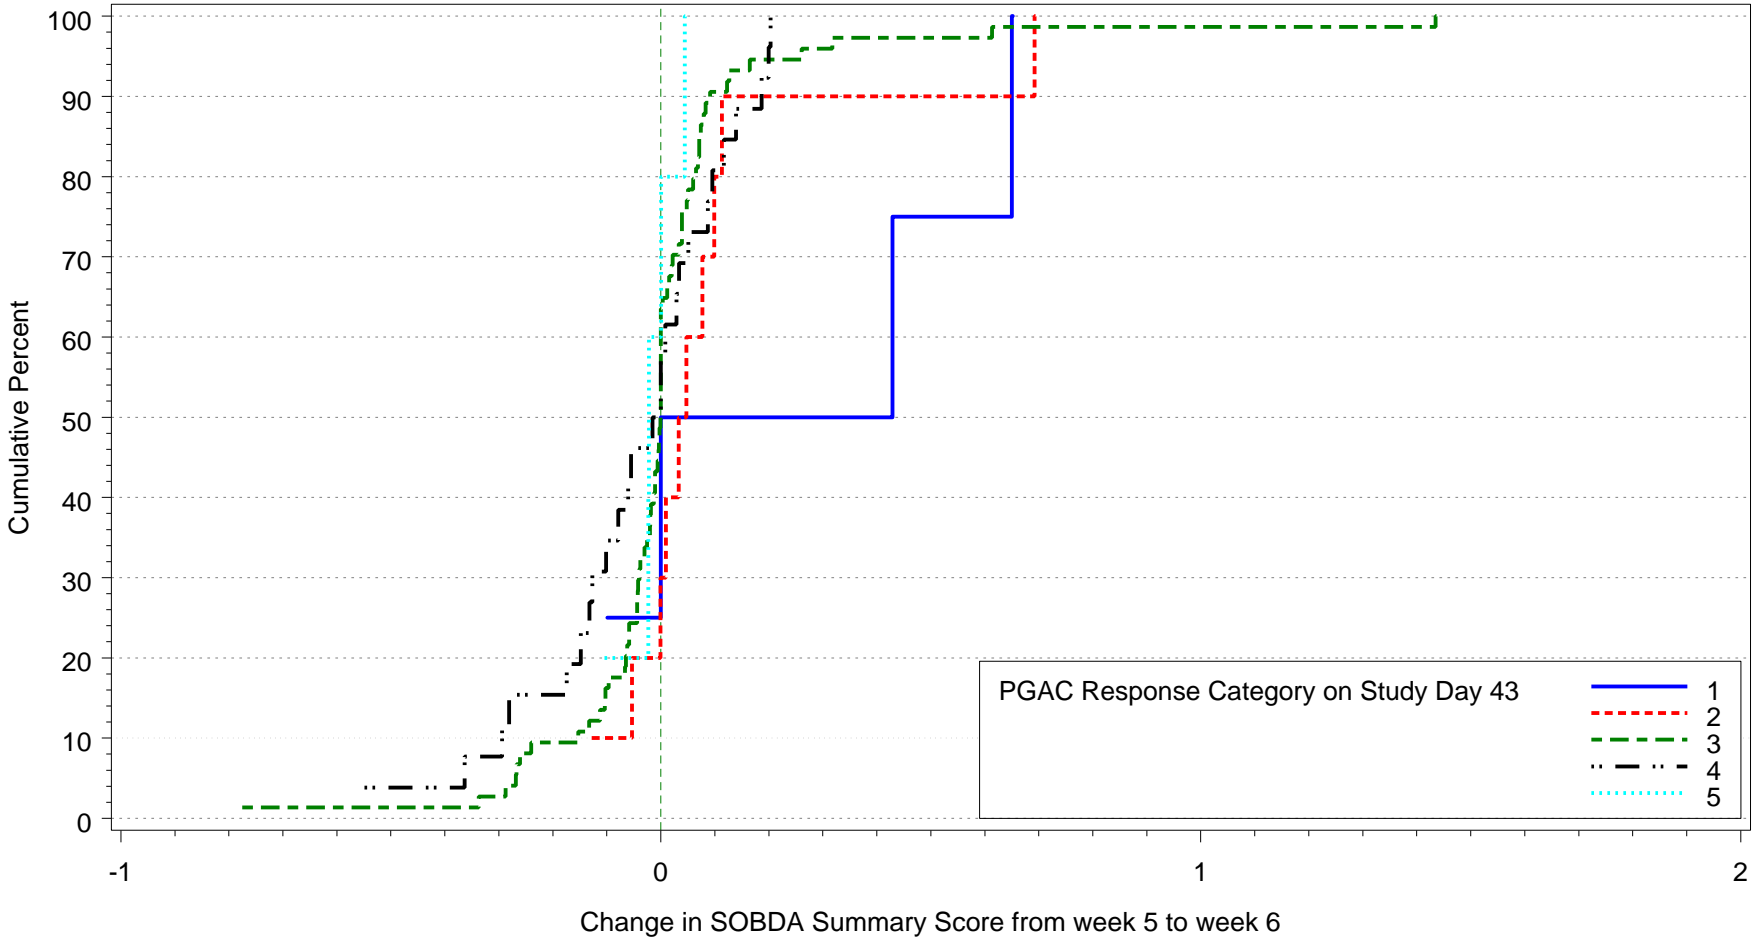

PGAC response categories: 1 = "Much worse"; 2 = "Worse"; 3 = "No change"; 4 = "Better"; 5 = "Much better"  
sam31676: /arenv/arprod/cci18781\_gr33343/asq112989/final/drivers/sobda\_f015f.sas 12OCT2011 16:25

CONFIDENTIAL

ASQ112989

Protocol: ASQ112989  
Population: Modified Intent-to-treat

Figure 2.16  
Cumulative Distribution Plot of Change from Baseline in SOBDA Last Treatment Week Score by CGI-C Response Categories at Visit 3/PD

189

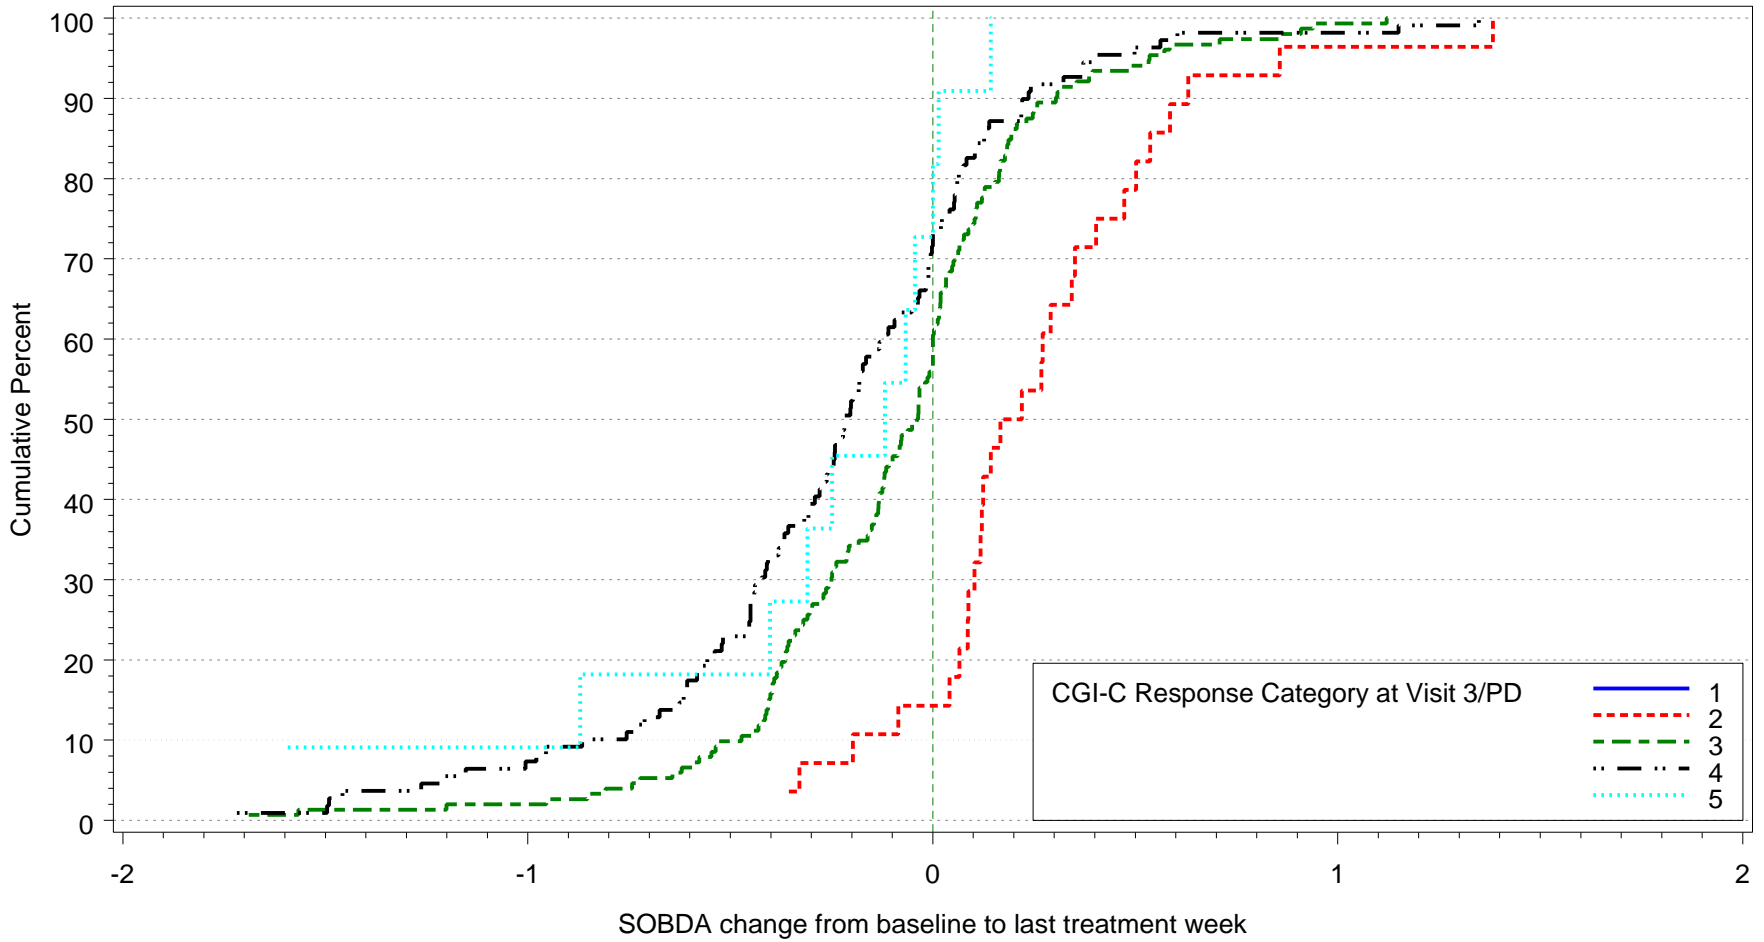

CGI-C response categories: 1 = "Much worse"; 2 = "Worse"; 3 = "No change"; 4 = "Better"; 5 = "Much better"  
sam31676: /arenv/arprod/cci18781\_gr33343/asq112989/final/drivers/sobda\_f016f.sas 12OCT2011 16:25

CONFIDENTIAL

ASQ112989

Protocol: ASQ112989  
Population: Modified Intent-to-treat

Figure 2.17  
Cumulative Distribution Plot of Percentage Change from Baseline in SOBDA Last Treatment Week Score  
by CGI-C Response Categories at Visit 3/PD

190

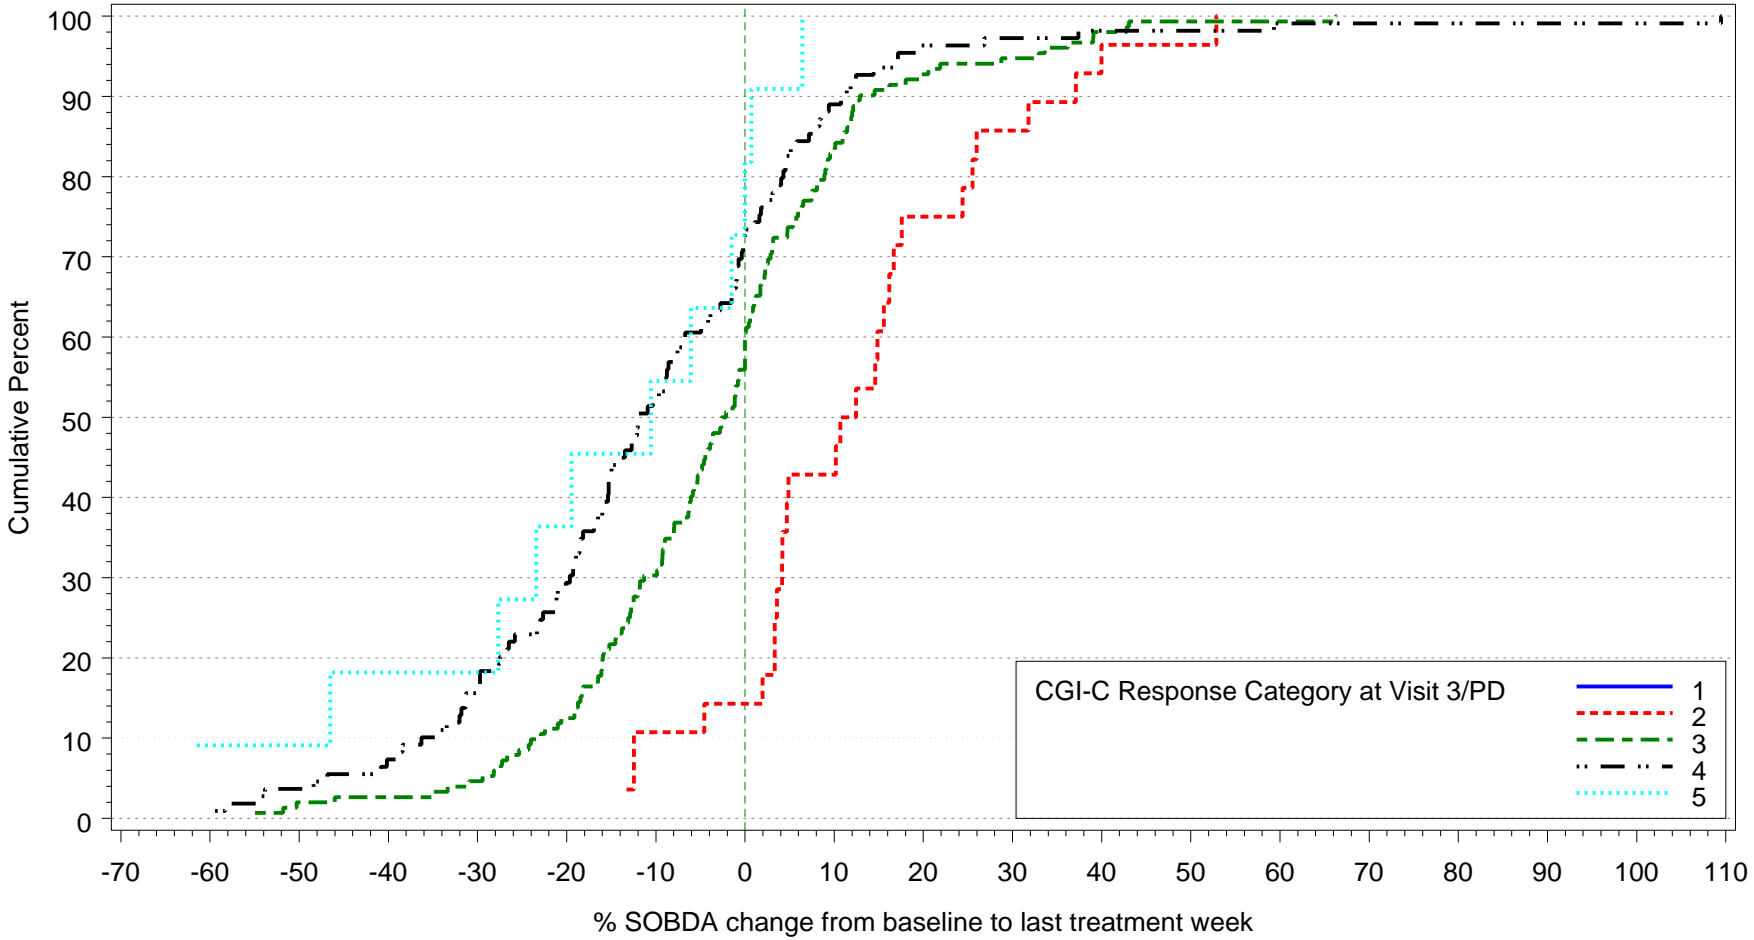

CGI-C response categories: 1 = "Much worse"; 2 = "Worse"; 3 = "No change"; 4 = "Better"; 5 = "Much better"  
sam31676: /arenv/arprod/cc18781\_gr33343/asq112989/final/drivers/sobda\_f017f.sas 12OCT2011 16:25

CONFIDENTIAL

ASQ112989

Protocol: ASQ112989  
Population: Modified Intent-to-treat

Figure 2.18  
Cumulative Distribution Plot of Change from Baseline in SOBDA Last Treatment Week Score by CRQ-SAS  
Dyspnoea Domain 3-Point Response Categories at Visit 3

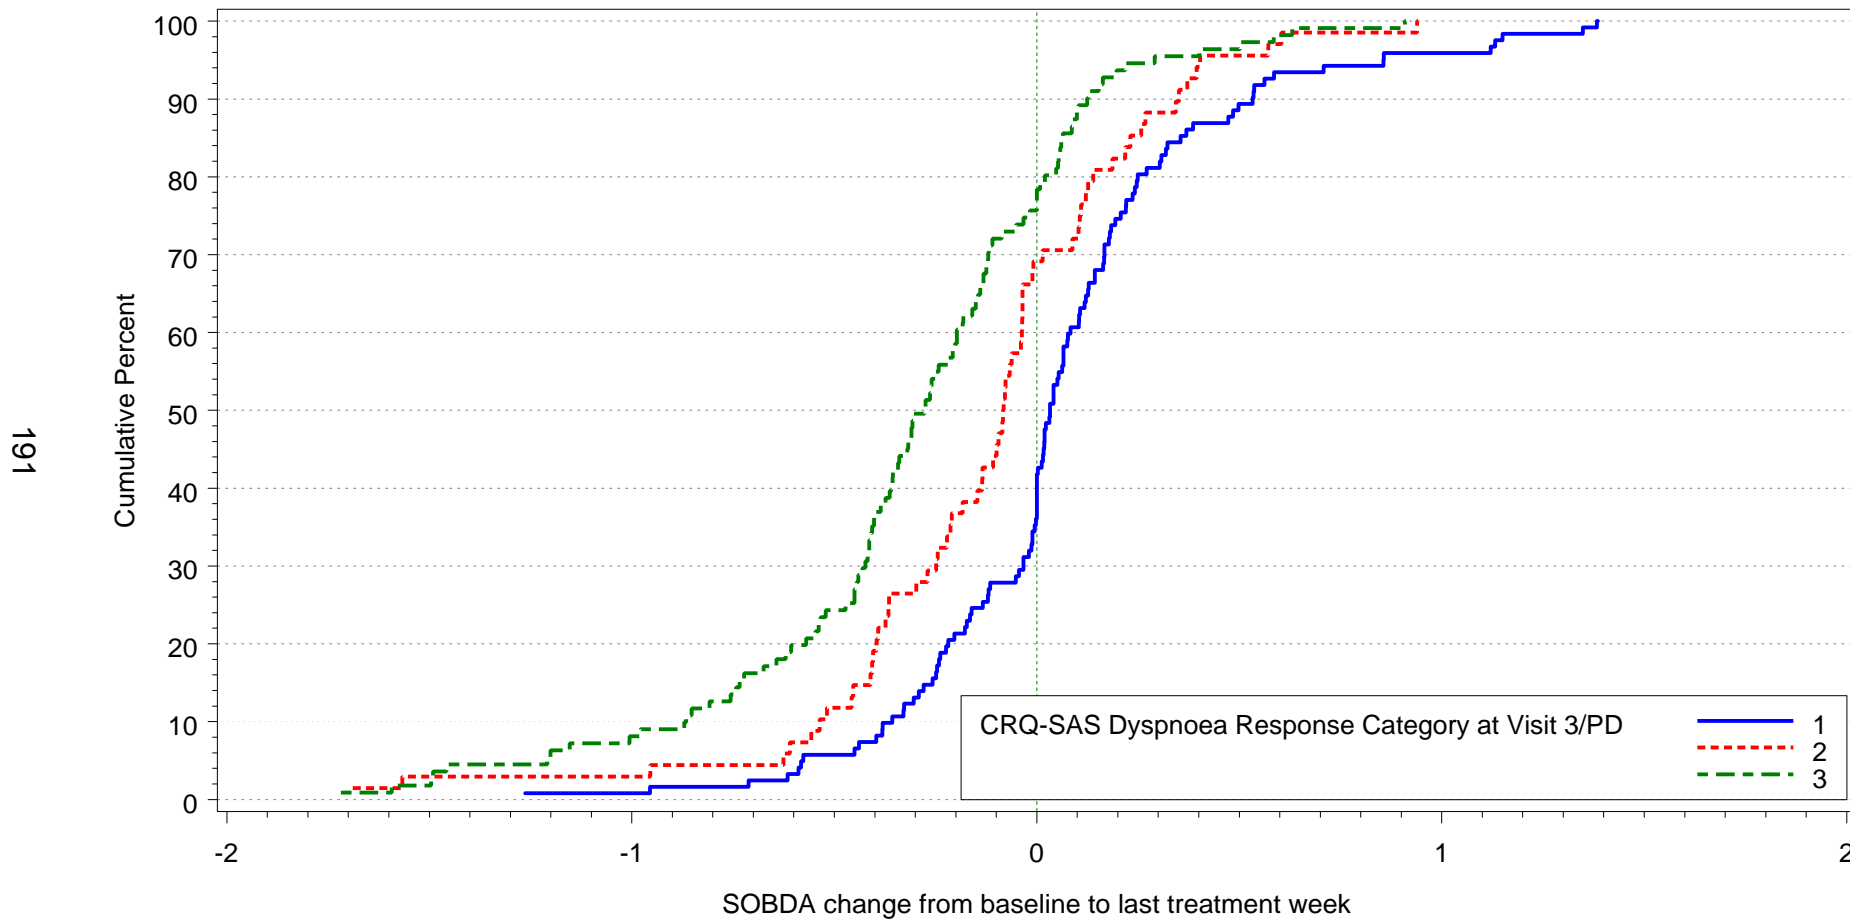

CRQ-SAS Dyspnoea Domain 3-point response categories:  
1 = 'No change or worse' (i.e. change of  $\leq 0$  units); 2 = 'Better' (i.e. change of  $> 0-0.5$  units); 3 = 'Much better' (i.e. change of  $> 0.5$  units).  
sam31676: /arenv/arprod/cci18781\_gr33343/asq112989/final/drivers/sobda\_f018f.sas 12OCT2011 16:25

191

CONFIDENTIAL

ASQ112989

Protocol: ASQ112989  
Population: Modified Intent-to-treat

Figure 2.19  
Cumulative Distribution Plot of Percentage Change from Baseline in SOBDA Last Treatment Week Score  
by CRQ-SAS Dyspnoea Domain 3-Point Response Categories at Visit 3

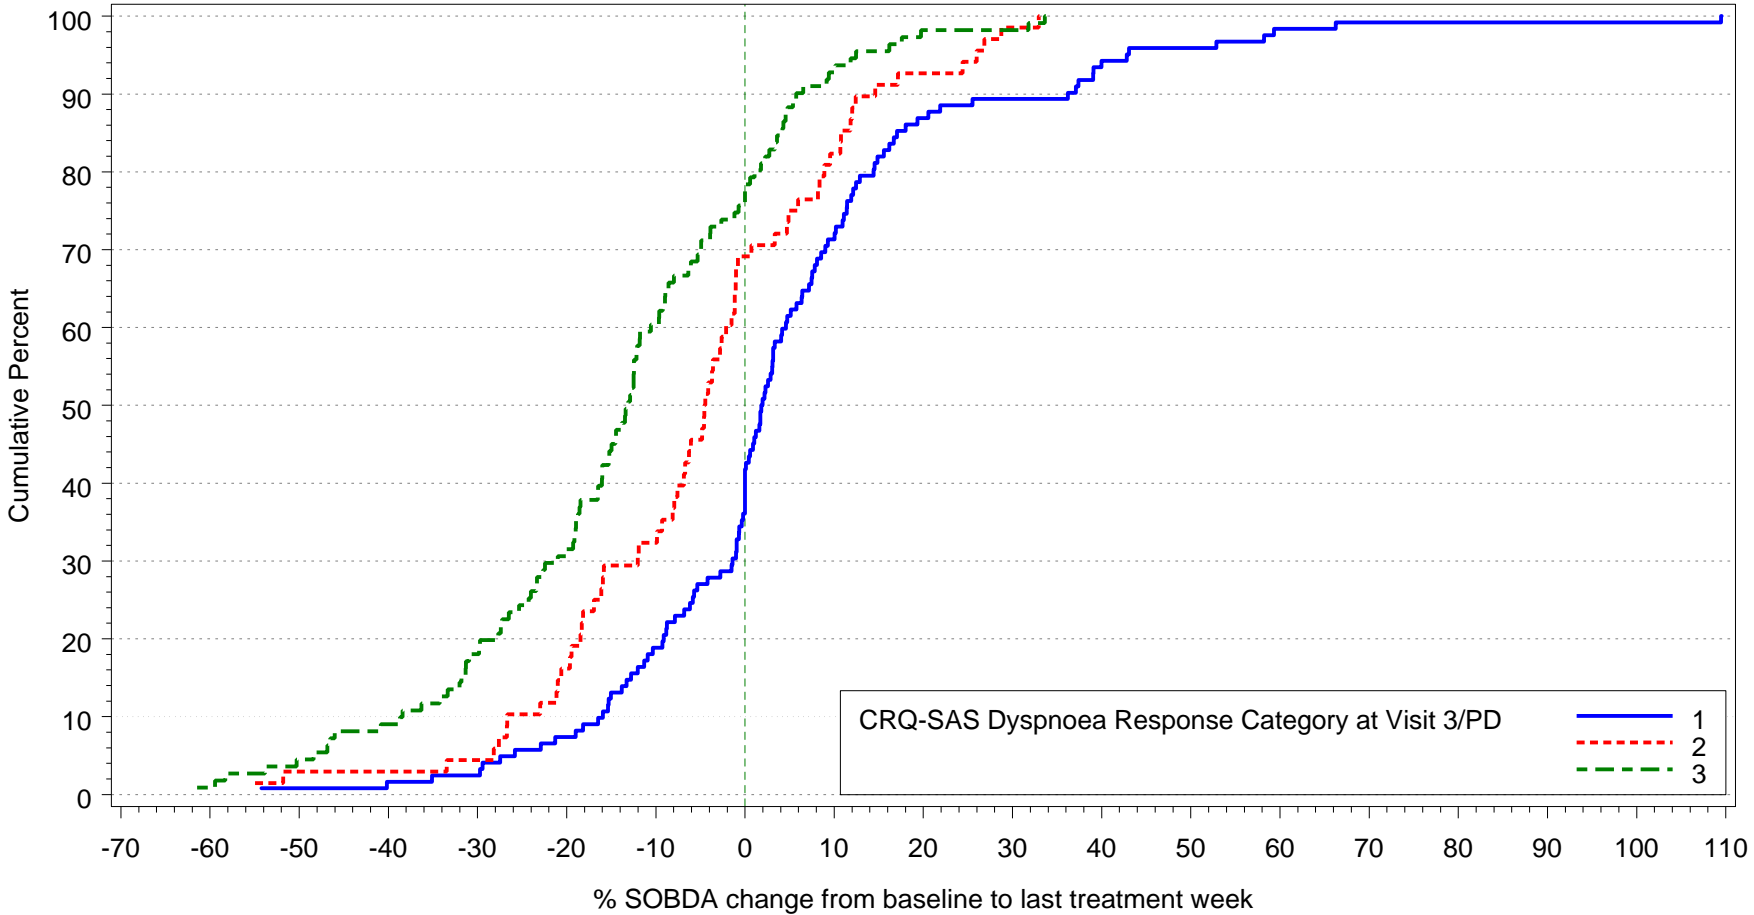

192

CRQ-SAS Dyspnoea Domain 3-point response categories:  
1 = 'No change or worse' (i.e. change of <=0 units); 2 = 'Better' (i.e. change of >0-0.5 units); 3 = 'Much better' (i.e. change of >0.5 units).  
sam31676: /arenv/arprod/cc18781\_gr33343/asq112989/final/drivers/sobda\_f019f.sas 12OCT2011 16:25

CONFIDENTIAL

ASQ112989



Protocol: ASQ112989  
Population: Modified Intent-to-treat

Figure 2.20  
Cumulative Distribution Plot of Change from Baseline in SOBDA Last Treatment Week Score by FEV1  
3-Point Response Categories at Visit 3

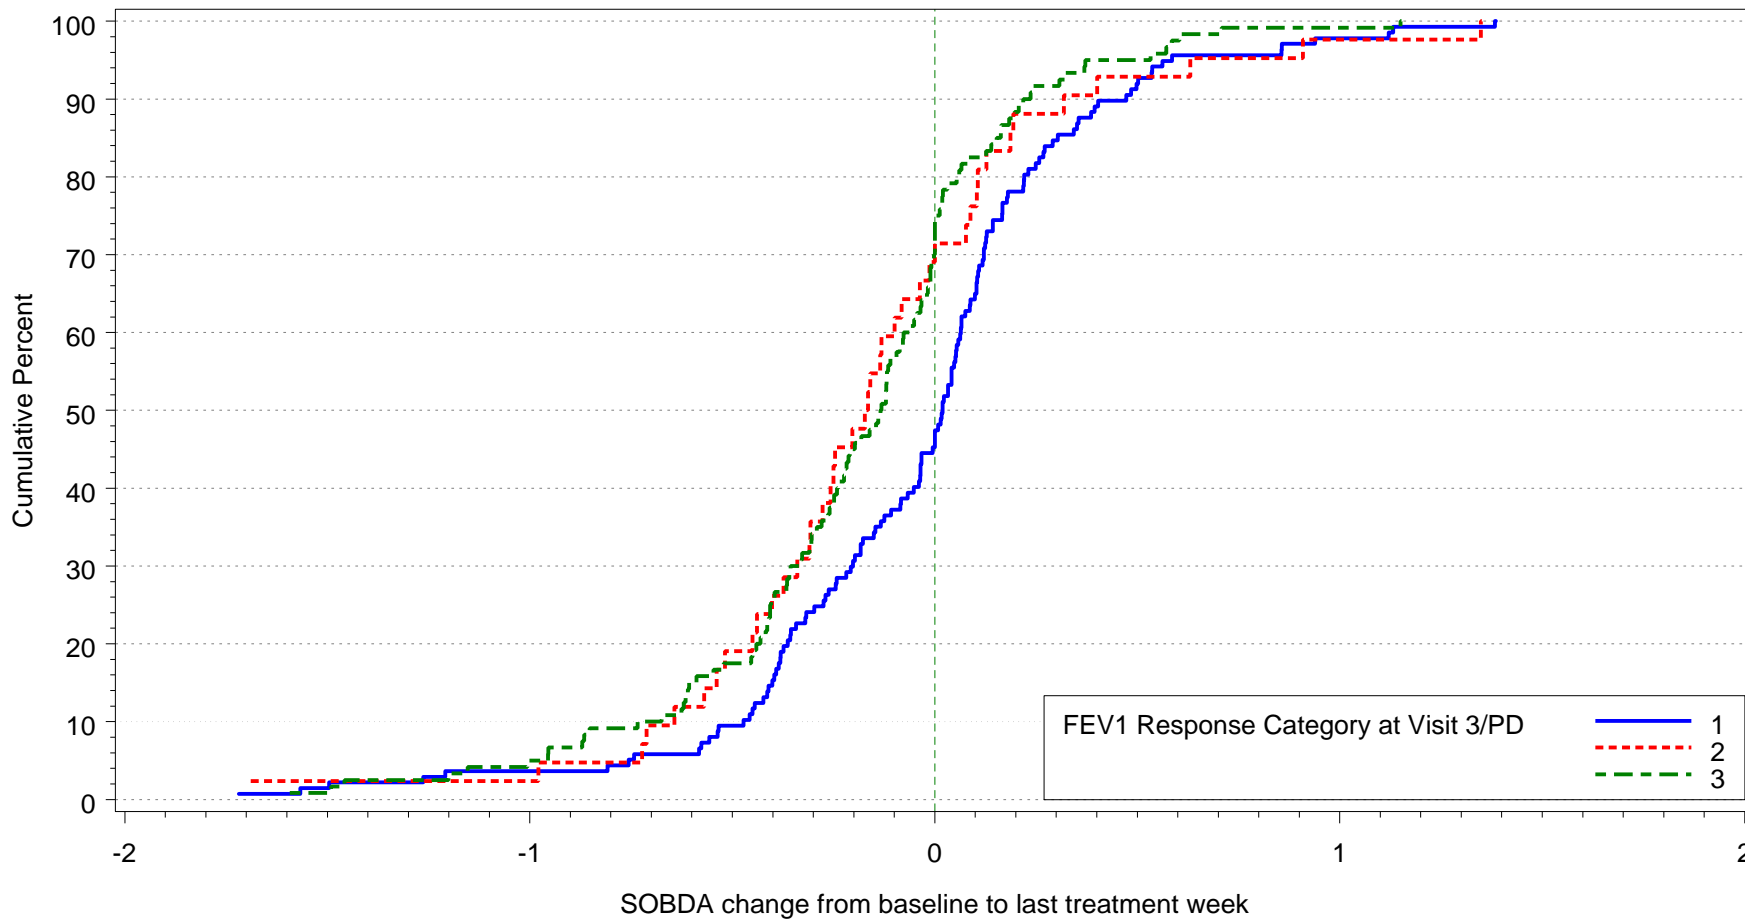

FEV1 3-point response categories:  
1 = 'No change or worse' (i.e. change of <50mL); 2 = 'Better' (i.e. change of 50-<100mL); 3 = 'Much better' (i.e. change of >=100mL).  
sam31676: /arenv/arprod/cc18781\_gr33343/asq112989/final/drivers/sobda\_f020f.sas 12OCT2011 16:25

193

CONFIDENTIAL

ASQ112989

Protocol: ASQ112989  
Population: Modified Intent-to-treat

Figure 2.21  
Cumulative Distribution Plot of Percentage Change from Baseline in SOBDA Last Treatment Week Score  
by FEV1 3-Point Response Categories at Visit 3

194

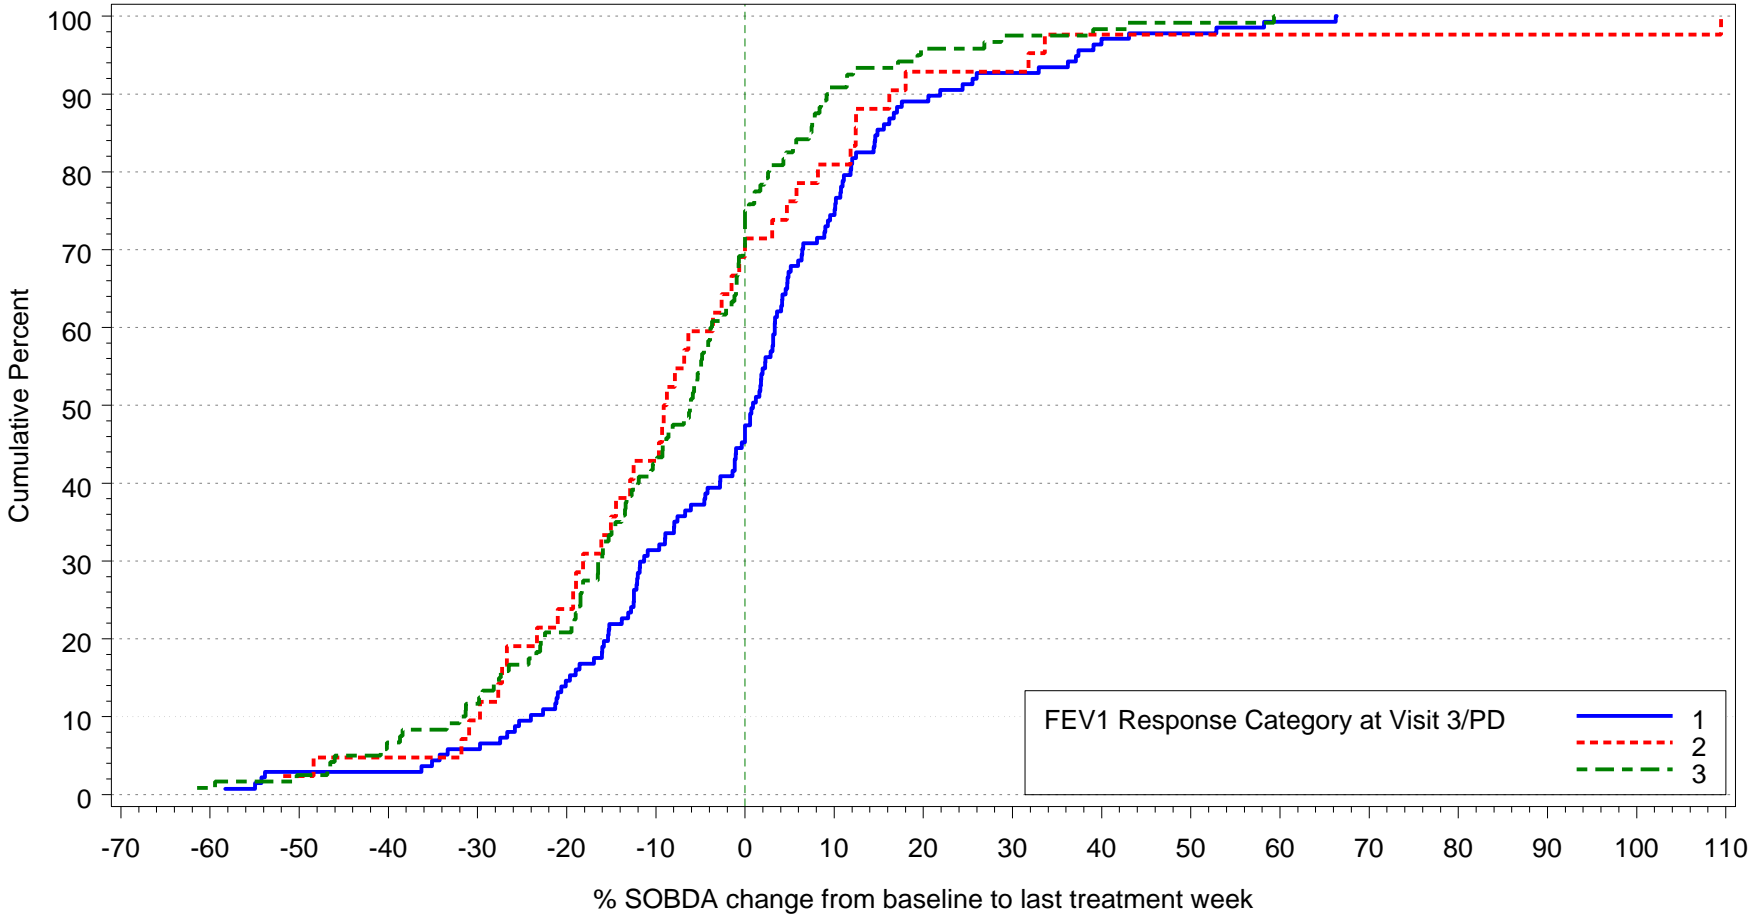

FEV1 3-point response categories:  
1 = 'No change or worse' (i.e. change of <50mL); 2 = 'Better' (i.e. change of 50-<100mL); 3 = 'Much better' (i.e. change of >=100mL).  
sam31676: /arenv/arprod/cc18781\_gr33343/asq112989/final/drivers/sobda\_f021f.sas 12OCT2011 16:25

CONFIDENTIAL

ASQ112989

Protocol: ASQ112989  
Population: Run-in

Page 1 of 1

Table 2.01  
SOBDA Internal Consistency: Cronbachs Alpha Value  
Subjects with a score for each SOBDA item on Day 1 of Run-in

|                                                     | All Subjects<br>(N=418) |
|-----------------------------------------------------|-------------------------|
| Subjects with score on each item on day 1 of run-in | 344 (82%)               |
| Cronbach's Alpha                                    | 0.892                   |

195

For peer review only

CONFIDENTIAL

ASQ112989

sam31676: /arenv/arprod/ccil8781\_gr33343/asq112989/final/drivers/sobda\_t001f.sas 12OCT2011 16:04

Protocol: ASQ112989  
Population: Run-in

Page 1 of 1

Table 2.02

SOBDA Test-Retest Reliability - Subjects with response of 'no change' on second weekly PGAC assessment (on the day of or prior to Visit 2)

|                                                                            |        | All Subjects<br>(N=418) |
|----------------------------------------------------------------------------|--------|-------------------------|
| -----                                                                      |        |                         |
| Subjects with response of 'no change' on second weekly PGAC assessment [1] |        | 172 (41%)               |
| Difference in SOBDA Run-in week 1 score and Run-in week 2 score            | n      | 152                     |
|                                                                            | Mean   | 0.01                    |
|                                                                            | SD     | 0.244                   |
|                                                                            | Median | -0.01                   |
|                                                                            | Min.   | -0.6                    |
|                                                                            | Max.   | 0.9                     |
| Effect size                                                                |        | 0.010                   |
| Pearson's correlation coefficient                                          |        | 0.94                    |
| Intra-class correlation coefficient                                        |        | 0.94                    |
| Estimated difference                                                       |        | 0.01                    |
| 95% confidence interval                                                    |        | (-0.03, 0.05)           |
| p-value                                                                    |        | 0.713                   |

[1] Includes PGAC assessment performed on day 14 of run-in period, providing this occurred prior to or on the same day as visit 2.

N.B. Effect size is defined as the difference between the SOBDA run-in week 1 score and SOBDA run-in week 2 divided by the standard deviation of the SOBDA run-in week 1 score.

sam31676: /arenv/arprod/ccil8781\_gr33343/asq112989/final/drivers/sobda\_t002f.sas 12OCT2011 16:04

196

CONFIDENTIAL

ASQ112989

Protocol: ASQ112989  
 Population: Run-in

Page 1 of 1

Table 2.03  
 SOBDA Convergent Validity

|                            |                                                | All<br>Subjects<br>(N=418) |
|----------------------------|------------------------------------------------|----------------------------|
| Physician-completed mMRC   | n [1]                                          | 339                        |
|                            | Spearman rank order<br>correlation coefficient | 0.24                       |
| Participant-completed mMRC | n [1]                                          | 340                        |
|                            | Spearman rank order<br>correlation coefficient | 0.29                       |
| CRQ-SAS dyspnoea domain    | n [1]                                          | 340                        |
|                            | Pearson's correlation<br>coefficient           | -0.68                      |
| CGI-S                      | n [1]                                          | 338                        |
|                            | Spearman rank order<br>correlation coefficient | 0.24                       |

197

[1] Number of subjects with a SOBDA baseline score and the relevant assessment at visit 2.  
 sam31676: /arenv/arprod/ccil8781\_gr33343/asq112989/final/drivers/sobda\_t003f.sas 12OCT2011 16:04

CONFIDENTIAL

ASQ112989

Protocol: ASQ112989  
Population: Run-in

Table 2.04

SOBDA Known Group Validity: Summary of Comparison of SOBDA Baseline Score with Physician-Completed mMRC at Visit 2

|                                |        | ----Physician-Completed mMRC Score at Visit 2 [1] ---- |       |       |       |
|--------------------------------|--------|--------------------------------------------------------|-------|-------|-------|
|                                |        | 0-1                                                    | 2     | 3     | 4     |
| Number of subjects in category |        | 13                                                     | 225   | 126   | 11    |
| SOBDA baseline score           | n      | 12                                                     | 200   | 117   | 10    |
|                                | Mean   | 1.81                                                   | 2.06  | 2.31  | 2.86  |
|                                | SD     | 0.674                                                  | 0.707 | 0.666 | 0.532 |
|                                | Median | 1.81                                                   | 2.00  | 2.33  | 2.80  |
|                                | Min    | 1.0                                                    | 1.0   | 1.0   | 2.3   |
|                                | Max    | 3.0                                                    | 3.9   | 4.0   | 3.8   |

[1] Response Categories:

0 = Not troubled with breathlessness except with strenuous exercise; 1 = Troubled by shortness of breath when hurrying on level/walking up slight hill; 2 = Walks slower than others of same age on level b/c breathlessness; 3 = Stops to breathe after walking about 100 yards/meters or after few min on level; 4 = Too breathless to leave house or breathless when dressing or undressing

sam31676: /arenv/arprod/ccil8781\_gr33343/asq112989/final/drivers/sobda\_t004f.sas 12OCT2011 16:04

198

CONFIDENTIAL

ASQ112989

Protocol: ASQ112989  
 Population: Run-in

Page 1 of 1

Table 2.05  
 SOBDA Known Group Validity: Analysis of Comparison of SOBDA Baseline Score with Physician-Completed mMRC at Visit 2

|                          |        | ----Physician-Completed mMRC Score at Visit 2 [1] ---- |                       |                        |                        |
|--------------------------|--------|--------------------------------------------------------|-----------------------|------------------------|------------------------|
|                          |        | 0-1                                                    | 2                     | 3                      | 4                      |
| n [1]                    |        | 12                                                     | 200                   | 117                    | 10                     |
| SOBDA baseline score [2] |        | 1.78<br>(0.196)                                        | 2.08<br>(0.048)       | 2.28<br>(0.063)        | 2.73<br>(0.216)        |
| Overall F-statistic      | 5.71   |                                                        |                       |                        |                        |
| p-value                  | <0.001 |                                                        |                       |                        |                        |
| Pairwise comparisons [3] |        | 0-1                                                    | -0.30<br>(-0.69,0.10) | -0.50<br>(-0.90,-0.10) | -0.95<br>(-1.52,-0.38) |
|                          |        | 2                                                      |                       | -0.20<br>(-0.36,-0.05) | -0.65<br>(-1.09,-0.22) |
|                          |        | 3                                                      |                       |                        | -0.45<br>(-0.89,-0.01) |

199

CONFIDENTIAL

ASQ112989

[1] Number of subjects with SOBDA baseline score, age, gender and % predicted FEV1 at Screening.  
 [2] Least squares mean (standard error)  
 [3] Difference (95% confidence interval)  
 [4] Response Categories:  
 0 = Not troubled with breathlessness except with strenuous exercise; 1 = Troubled by shortness of breath when hurrying on level/walking up slight hill; 2 = Walks slower than others of same age on level b/c breathlessness; 3 = Stops to breathe after walking about 100 yards/meters or after few min on level; 4 = Too breathless to leave house or breathless when dressing or undressing  
 Note: Analysis of covariance adjusted for age, gender and % predicted FEV1 at Screening.  
 sam31676: /arenv/arprod/ccil8781\_gr33343/asq112989/final/drivers/sobda\_t005f.sas 12OCT2011 16:04

Protocol: ASQ112989  
Population: Run-in

Table 2.06  
SOBDA Known Group Validity: Summary of Comparison of SOBDA Baseline Score with Participant-Completed mMRC at Visit 2

|                                |        | -----Participant-Completed mMRC Score at Visit 2 [1] ----- |       |       |       |       |
|--------------------------------|--------|------------------------------------------------------------|-------|-------|-------|-------|
|                                |        | 0                                                          | 1     | 2     | 3     | 4     |
| Number of subjects in category |        | 15                                                         | 114   | 148   | 77    | 23    |
| SOBDA baseline score           | n      | 12                                                         | 103   | 138   | 65    | 22    |
|                                | Mean   | 1.86                                                       | 1.93  | 2.20  | 2.29  | 2.80  |
|                                | SD     | 0.804                                                      | 0.658 | 0.691 | 0.693 | 0.511 |
|                                | Median | 1.83                                                       | 1.86  | 2.20  | 2.26  | 2.64  |
|                                | Min    | 1.0                                                        | 1.0   | 1.0   | 1.1   | 2.0   |
|                                | Max    | 3.3                                                        | 3.7   | 3.9   | 4.0   | 3.8   |

[1] Response Categories:

0 = Not troubled with breathlessness except with strenuous exercise; 1 = Troubled by shortness of breath when hurrying on level/walking up slight hill; 2 = Walks slower than others of same age on level b/c breathlessness; 3 = Stops to breathe after walking about 100 yards/meters or after few min on level; 4 = Too breathless to leave house or breathless when dressing or undressing

sam31676: /arenv/arprod/ccil8781\_gr33343/asq112989/final/drivers/sobda\_t006f.sas 12OCT2011 16:04

CONFIDENTIAL

ASQ112989

1  
2  
3  
4  
5  
6  
7  
8  
9  
10  
11  
12  
13  
14  
15  
16  
17  
18  
19  
20  
21  
22  
23  
24  
25  
26  
27  
28  
29  
30  
31  
32  
33  
34  
35  
36  
37  
38  
39  
40  
41  
42  
43  
44  
45  
46  
47  
48  
49

200



Protocol: ASQ112989  
 Population: Run-in

Page 1 of 1

Table 2.07  
 SOBDA Known Group Validity: Analysis of Comparison of SOBDA Baseline Score with Participant-Completed mMRC at Visit 2

|                          |        | -----Participant-Completed mMRC Score at Visit 2 [1] ----- |                       |                        |                        |                        |
|--------------------------|--------|------------------------------------------------------------|-----------------------|------------------------|------------------------|------------------------|
|                          |        | 0                                                          | 1                     | 2                      | 3                      | 4                      |
| n [1]                    |        | 12                                                         | 103                   | 138                    | 65                     | 22                     |
| SOBDA baseline score [2] |        | 1.92<br>(0.192)                                            | 1.94<br>(0.066)       | 2.20<br>(0.056)        | 2.26<br>(0.083)        | 2.73<br>(0.142)        |
| Overall F-statistic      | 7.66   |                                                            |                       |                        |                        |                        |
| p-value                  | <0.001 |                                                            |                       |                        |                        |                        |
| Pairwise comparisons [3] |        | 0                                                          | -0.02<br>(-0.42,0.38) | -0.28<br>(-0.67,0.11)  | -0.34<br>(-0.76,0.07)  | -0.81<br>(-1.28,-0.34) |
|                          |        | 1                                                          |                       | -0.26<br>(-0.43,-0.09) | -0.32<br>(-0.53,-0.12) | -0.79<br>(-1.10,-0.48) |
|                          |        | 2                                                          |                       |                        | -0.06<br>(-0.26,0.13)  | -0.53<br>(-0.83,-0.23) |
|                          |        | 3                                                          |                       |                        |                        | -0.47<br>(-0.79,-0.15) |

201

[1] Number of subjects with SOBDA baseline score, age, gender and % predicted FEV1 at Screening.  
 [2] Least squares mean (standard error)  
 [3] Difference (95% confidence interval)  
 [4] Response Categories:  
 0 = Not troubled with breathlessness except with strenuous exercise; 1 = Troubled by shortness of breath when hurrying on level/walking up slight hill; 2 = Walks slower than others of same age on level b/c breathlessness; 3 = Stops to breathe after walking about 100 yards/meters or after few min on level; 4 = Too breathless to leave house or breathless when dressing or undressing  
 Note: Analysis of covariance adjusted for age, gender and % predicted FEV1 at Screening.  
 sam31676: /arenv/arprod/ccil8781\_gr33343/asq112989/final/drivers/sobda\_t007f.sas 12OCT2011 16:04

CONFIDENTIAL

ASQ112989

Protocol: ASQ112989  
Population: Run-in

Table 2.08

SOBDA Known Group Validity: Summary of Comparison of SOBDA Baseline Score with CGI-S at Visit 2

-Clinical Global Impression of Dyspnea at Visit 2 [1] -  
1 2 3 4

|                                |        | 1     | 2     | 3     | 4     |
|--------------------------------|--------|-------|-------|-------|-------|
| Number of subjects in category |        | 25    | 256   | 86    | 6     |
| SOBDA baseline score           |        |       |       |       |       |
|                                | n      | 19    | 236   | 78    | 5     |
|                                | Mean   | 1.85  | 2.09  | 2.40  | 2.84  |
|                                | SD     | 0.759 | 0.683 | 0.707 | 0.420 |
|                                | Median | 1.51  | 2.08  | 2.42  | 2.84  |
|                                | Min    | 1.0   | 1.0   | 1.0   | 2.4   |
|                                | Max    | 3.5   | 3.9   | 4.0   | 3.4   |

For peer review only

[1] Response Categories: 1 = Mild; 2 = Moderate; 3 = Severe; 4 = Very severe  
sam31676: /arenv/arprod/ccil8781\_gr33343/asq112989/final/drivers/sobda\_t008f.sas 12OCT2011 16:04

202

CONFIDENTIAL

ASQ112989

Protocol: ASQ112989  
 Population: Run-in

Page 1 of 1

Table 2.09

SOBDA Known Group Validity: Analysis of Comparison of SOBDA Baseline Score with CGI-S at Visit 2

|                          | ---Clinical Global Impression of Dyspnea at Visit 2 [4]--- |                       |                        |                        |
|--------------------------|------------------------------------------------------------|-----------------------|------------------------|------------------------|
|                          | 1                                                          | 2                     | 3                      | 4                      |
| n [1]                    | 19                                                         | 236                   | 78                     | 5                      |
| SOBDA baseline score [2] | 1.87<br>(0.156)                                            | 2.11<br>(0.045)       | 2.33<br>(0.080)        | 2.72<br>(0.305)        |
| Overall F-statistic      | 3.98                                                       |                       |                        |                        |
| p-value                  | 0.008                                                      |                       |                        |                        |
| Pairwise comparisons [3] | 1                                                          | -0.23<br>(-0.55,0.08) | -0.45<br>(-0.80,-0.11) | -0.84<br>(-1.52,-0.17) |
|                          | 2                                                          |                       | -0.22<br>(-0.40,-0.04) | -0.61<br>(-1.22,-0.00) |
|                          | 3                                                          |                       |                        | -0.39<br>(-1.01,0.23)  |

203

CONFIDENTIAL

ASQ112989

[1] Number of subjects with SOBDA baseline score, age, gender and % predicted FEV1 at Screening.  
 [2] Least squares mean (standard error)  
 [3] Difference (95% confidence interval)  
 [4] Response Categories: 1 = Mild; 2 = Moderate; 3 = Severe; 4 = Very severe  
 Note: Analysis of covariance adjusted for age, gender and % predicted FEV1 at Screening.  
 sam31676: /arenv/arprod/ccil8781\_gr33343/asq112989/final/drivers/sobda\_t009f.sas 12OCT2011 16:04

Protocol: ASQ112989  
 Population: Modified intent-to-treat

Page 1 of 1

Table 2.10

SOBDA Responsiveness: Summary of SOBDA Treatment Week 1 Score by PGAC Response at Study Day 8

|                                                       |                          | PGAC response at study day 8 [1] |                |
|-------------------------------------------------------|--------------------------|----------------------------------|----------------|
|                                                       |                          | Responders                       | Non-Responders |
| Number of subjects in category                        |                          | 115                              | 210            |
| SOBDA treatment week 1 score                          | n                        | 109                              | 200            |
|                                                       | Mean                     | 1.91                             | 2.13           |
|                                                       | SD                       | 0.733                            | 0.671          |
|                                                       | Median                   | 1.77                             | 2.16           |
|                                                       | Min                      | 1.0                              | 1.0            |
|                                                       | Max                      | 4.0                              | 3.8            |
| Change in SOBDA Summary Score from baseline to week 1 | n                        | 105                              | 188            |
|                                                       | Mean                     | -0.26                            | -0.01          |
|                                                       | SD                       | 0.324                            | 0.254          |
|                                                       | Median                   | -0.19                            | 0.01           |
|                                                       | Min                      | -1.3                             | -1.1           |
|                                                       | Max                      | 0.5                              | 0.9            |
|                                                       | Mean percentage change   | -11.71                           | 0.41           |
|                                                       | Standardised effect size | -0.34                            | -0.01          |

[1] A PGAC responder is defined as a subject who had a response of "better" or "much better".  
 A PGAC non-responder is defined as a subject who had a response of "much worse", "worse" or "no change".  
 N.B. The standardised effect size is defined as the difference between the mean baseline and mean post-treatment value divided by the standard deviation of the baseline scores.  
 sam31676: /arenv/arprod/ccil8781\_gr33343/asq112989/final/drivers/sobda\_t010f.sas 12OCT2011 16:04

CONFIDENTIAL

ASQ112989

Protocol: ASQ112989  
 Population: Modified intent-to-treat

Page 1 of 1

Table 2.11

SOBDA Responsiveness: Analysis of SOBDA Treatment Week 1 Score by PGAC Response at Study Day 8

|                                                           | PGAC response at study day 8 [5] |                               |
|-----------------------------------------------------------|----------------------------------|-------------------------------|
|                                                           | Responders                       | Non-Responders                |
| n [1]                                                     | 105                              | 188                           |
| Change in SOBDA Summary Score from baseline to week 1 [2] | -0.26 (0.027)                    | -0.02 (0.020)                 |
| Comparison with responders                                | Responsiveness statistic [3]     | 1.0                           |
| Comparison with responders [4]                            | Difference<br>95% CI<br>p-value  | 0.24<br>(0.18,0.31)<br><0.001 |

205

CONFIDENTIAL

ASQ112989

[1] Number of subjects with change in SOBDA score from baseline or previous week.  
 [2] Least squares mean (standard error)  
 [3] Unadjusted difference between responders and non-responders, divided by the standard deviation of non-responders.  
 [4] Analysis of covariance adjusted for age, gender and SOBDA baseline score.  
 [5] A PGAC responder is defined as a subject who had a response of "better" or "much better".  
 A PGAC non-responder is defined as a subject who had a response of "much worse", "worse" or "no change".  
 sam31676: /arenv/arprod/ccil8781\_gr33343/asq112989/final/drivers/sobda\_t011f.sas 12OCT2011 16:10

Protocol: ASQ112989  
 Population: Modified intent-to-treat

Page 1 of 1

Table 2.12

SOBDA Responsiveness: Summary of SOBDA Treatment Week 2 Score by PGAC Response at Study Day 15

|                                                     |                          | PGAC response at study day 15 [1] |                |
|-----------------------------------------------------|--------------------------|-----------------------------------|----------------|
|                                                     |                          | Responders                        | Non-Responders |
| Number of subjects in category                      |                          | 98                                | 222            |
| SOBDA treatment week 2 score                        | n                        | 94                                | 216            |
|                                                     | Mean                     | 1.79                              | 2.13           |
|                                                     | SD                       | 0.643                             | 0.752          |
|                                                     | Median                   | 1.70                              | 2.13           |
|                                                     | Min                      | 1.0                               | 1.0            |
|                                                     | Max                      | 3.8                               | 4.0            |
| Change in SOBDA Summary Score from week 1 to week 2 | n                        | 91                                | 212            |
|                                                     | Mean                     | -0.10                             | 0.01           |
|                                                     | SD                       | 0.280                             | 0.222          |
|                                                     | Median                   | -0.07                             | 0.01           |
|                                                     | Min                      | -1.8                              | -1.1           |
|                                                     | Max                      | 0.6                               | 1.0            |
|                                                     | Mean percentage change   | -5.06                             | 0.95           |
|                                                     | Standardised effect size | -0.16                             | 0.02           |

[1] A PGAC responder is defined as a subject who had a response of "better" or "much better".  
 A PGAC non-responder is defined as a subject who had a response of "much worse", "worse" or "no change".  
 N.B. The standardised effect size is defined as the difference between the mean baseline and mean post-treatment value divided by the standard deviation of the baseline scores.  
 sam31676: /arenv/arprod/ccil8781\_gr33343/asq112989/final/drivers/sobda\_t012f.sas 12OCT2011 16:04

CONFIDENTIAL

ASQ112989

Protocol: ASQ112989  
 Population: Modified intent-to-treat

Page 1 of 1

Table 2.13

SOBDA Responsiveness: Analysis of SOBDA Treatment Week 2 Score by PGAC Response at Study Day 15

|                                                         | PGAC response at study day 15 [5] |                               |
|---------------------------------------------------------|-----------------------------------|-------------------------------|
|                                                         | Responders                        | Non-Responders                |
| n [1]                                                   | 91                                | 212                           |
| Change in SOBDA Summary Score from week 1 to week 2 [2] | -0.11 (0.026)                     | 0.02 (0.017)                  |
| Comparison with responders                              | Responsiveness statistic [3]      | 0.5                           |
| Comparison with responders [4]                          | Difference<br>95% CI<br>p-value   | 0.12<br>(0.06,0.19)<br><0.001 |

207

CONFIDENTIAL

ASQ112989

[1] Number of subjects with change in SOBDA score from baseline or previous week.  
 [2] Least squares mean (standard error)  
 [3] Unadjusted difference between responders and non-responders, divided by the standard deviation of non-responders.  
 [4] Analysis of covariance adjusted for age, gender and SOBDA Treatment Week 1 score.  
 [5] A PGAC responder is defined as a subject who had a response of "better" or "much better".  
 A PGAC non-responder is defined as a subject who had a response of "much worse", "worse" or "no change".  
 sam31676: /arenv/arprod/ccil8781\_gr33343/asq112989/final/drivers/sobda\_t013f.sas 12OCT2011 16:04

Protocol: ASQ112989  
 Population: Modified intent-to-treat

Page 1 of 1

Table 2.14

SOBDA Responsiveness: Summary of SOBDA Treatment Week 3 Score by PGAC Response at Study Day 22

|                                                     |                          | PGAC response at study day 22 [1] |                |
|-----------------------------------------------------|--------------------------|-----------------------------------|----------------|
|                                                     |                          | Responders                        | Non-Responders |
| Number of subjects in category                      |                          | 90                                | 227            |
| SOBDA treatment week 3 score                        | n                        | 85                                | 220            |
|                                                     | Mean                     | 1.72                              | 2.16           |
|                                                     | SD                       | 0.663                             | 0.740          |
|                                                     | Median                   | 1.62                              | 2.10           |
|                                                     | Min                      | 1.0                               | 1.0            |
|                                                     | Max                      | 4.0                               | 4.0            |
| Change in SOBDA Summary Score from week 2 to week 3 | n                        | 83                                | 216            |
|                                                     | Mean                     | -0.08                             | 0.02           |
|                                                     | SD                       | 0.223                             | 0.183          |
|                                                     | Median                   | -0.06                             | 0.00           |
|                                                     | Min                      | -0.8                              | -0.8           |
|                                                     | Max                      | 0.6                               | 0.7            |
|                                                     | Mean percentage change   | -3.09                             | 1.23           |
|                                                     | Standardised effect size | -0.11                             | 0.02           |

[1] A PGAC responder is defined as a subject who had a response of "better" or "much better".  
 A PGAC non-responder is defined as a subject who had a response of "much worse", "worse" or "no change".  
 N.B. The standardised effect size is defined as the difference between the mean baseline and mean post-treatment value divided by the standard deviation of the baseline scores.  
 sam31676: /arenv/arprod/ccil8781\_gr33343/asq112989/final/drivers/sobda\_t014f.sas 12OCT2011 16:04

CONFIDENTIAL

ASQ112989



Protocol: ASQ112989  
 Population: Modified intent-to-treat

Page 1 of 1

Table 2.15

SOBDA Responsiveness: Analysis of SOBDA Treatment Week 3 Score by PGAC Response at Study Day 22

|                                                         | PGAC response at study day 22 [5] |                               |
|---------------------------------------------------------|-----------------------------------|-------------------------------|
|                                                         | Responders                        | Non-Responders                |
| n [1]                                                   | 83                                | 216                           |
| Change in SOBDA Summary Score from week 2 to week 3 [2] | -0.09 (0.022)                     | 0.02 (0.013)                  |
| Comparison with responders                              | Responsiveness statistic [3]      | 0.5                           |
| Comparison with responders [4]                          | Difference<br>95% CI<br>p-value   | 0.11<br>(0.06,0.16)<br><0.001 |

209

CONFIDENTIAL

ASQ112989

[1] Number of subjects with change in SOBDA score from baseline or previous week.  
 [2] Least squares mean (standard error)  
 [3] Unadjusted difference between responders and non-responders, divided by the standard deviation of non-responders.  
 [4] Analysis of covariance adjusted for age, gender and SOBDA Treatment Week 2 score.  
 [5] A PGAC responder is defined as a subject who had a response of "better" or "much better".  
 A PGAC non-responder is defined as a subject who had a response of "much worse", "worse" or "no change".  
 sam31676: /arenv/arprod/ccil8781\_gr33343/asq112989/final/drivers/sobda\_t015f.sas 12OCT2011 16:04

Protocol: ASQ112989  
 Population: Modified intent-to-treat

Page 1 of 1

Table 2.16

SOBDA Responsiveness: Summary of SOBDA Treatment Week 4 Score by PGAC Response at Study Day 29

|                                                     |                          | PGAC response at study day 29 [1] |                |
|-----------------------------------------------------|--------------------------|-----------------------------------|----------------|
|                                                     |                          | Responders                        | Non-Responders |
| Number of subjects in category                      |                          | 68                                | 236            |
| SOBDA treatment week 4 score                        | n                        | 63                                | 226            |
|                                                     | Mean                     | 1.64                              | 2.13           |
|                                                     | SD                       | 0.662                             | 0.740          |
|                                                     | Median                   | 1.36                              | 2.01           |
|                                                     | Min                      | 1.0                               | 1.0            |
|                                                     | Max                      | 4.0                               | 4.0            |
| Change in SOBDA Summary Score from week 3 to week 4 | n                        | 62                                | 223            |
|                                                     | Mean                     | -0.09                             | 0.01           |
|                                                     | SD                       | 0.198                             | 0.193          |
|                                                     | Median                   | -0.03                             | 0.00           |
|                                                     | Min                      | -0.8                              | -0.7           |
|                                                     | Max                      | 0.4                               | 1.3            |
|                                                     | Mean percentage change   | -4.20                             | 1.01           |
|                                                     | Standardised effect size | -0.12                             | 0.02           |

[1] A PGAC responder is defined as a subject who had a response of "better" or "much better".  
 A PGAC non-responder is defined as a subject who had a response of "much worse", "worse" or "no change".  
 N.B. The standardised effect size is defined as the difference between the mean baseline and mean post-treatment value divided by the standard deviation of the baseline scores.  
 sam31676: /arenv/arprod/ccil8781\_gr33343/asq112989/final/drivers/sobda\_t016f.sas 12OCT2011 16:04

CONFIDENTIAL

ASQ112989

Protocol: ASQ112989  
 Population: Modified intent-to-treat

Page 1 of 1

Table 2.17

SOBDA Responsiveness: Analysis of SOBDA Treatment Week 4 Score by PGAC Response at Study Day 29

|                                                         | PGAC response at study day 29 [5] |                               |
|---------------------------------------------------------|-----------------------------------|-------------------------------|
|                                                         | Responders                        | Non-Responders                |
| n [1]                                                   | 62                                | 223                           |
| Change in SOBDA Summary Score from week 3 to week 4 [2] | -0.10 (0.025)                     | 0.02 (0.013)                  |
| Comparison with responders                              | Responsiveness statistic [3]      | 0.5                           |
| Comparison with responders [4]                          | Difference<br>95% CI<br>p-value   | 0.11<br>(0.06,0.17)<br><0.001 |

211

CONFIDENTIAL

ASQ112989

[1] Number of subjects with change in SOBDA score from baseline or previous week.  
 [2] Least squares mean (standard error)  
 [3] Unadjusted difference between responders and non-responders, divided by the standard deviation of non-responders.  
 [4] Analysis of covariance adjusted for age, gender and SOBDA Treatment Week 3 score.  
 [5] A PGAC responder is defined as a subject who had a response of "better" or "much better".  
 A PGAC non-responder is defined as a subject who had a response of "much worse", "worse" or "no change".  
 sam31676: /arenv/arprod/ccil8781\_gr33343/asq112989/final/drivers/sobda\_t017f.sas 12OCT2011 16:04

Protocol: ASQ112989  
 Population: Modified intent-to-treat

Page 1 of 1

Table 2.18

SOBDA Responsiveness: Summary of SOBDA Treatment Week 5 Score by PGAC Response at Study Day 36

|                                                     |                          | PGAC response at study day 36 [1] |                |
|-----------------------------------------------------|--------------------------|-----------------------------------|----------------|
|                                                     |                          | Responders                        | Non-Responders |
| Number of subjects in category                      |                          | 79                                | 219            |
| SOBDA treatment week 5 score                        | n                        | 77                                | 203            |
|                                                     | Mean                     | 1.66                              | 2.16           |
|                                                     | SD                       | 0.631                             | 0.758          |
|                                                     | Median                   | 1.45                              | 2.12           |
|                                                     | Min                      | 1.0                               | 1.0            |
|                                                     | Max                      | 3.6                               | 4.0            |
| Change in SOBDA Summary Score from week 4 to week 5 | n                        | 77                                | 200            |
|                                                     | Mean                     | -0.07                             | 0.03           |
|                                                     | SD                       | 0.245                             | 0.169          |
|                                                     | Median                   | -0.01                             | 0.00           |
|                                                     | Min                      | -1.5                              | -0.6           |
|                                                     | Max                      | 0.3                               | 0.6            |
|                                                     | Mean percentage change   | -2.64                             | 2.02           |
|                                                     | Standardised effect size | -0.10                             | 0.04           |

[1] A PGAC responder is defined as a subject who had a response of "better" or "much better".  
 A PGAC non-responder is defined as a subject who had a response of "much worse", "worse" or "no change".  
 N.B. The standardised effect size is defined as the difference between the mean baseline and mean post-treatment value divided by the standard deviation of the baseline scores.  
 sam31676: /arenv/arprod/ccil8781\_gr33343/asq112989/final/drivers/sobda\_t018f.sas 12OCT2011 16:04

CONFIDENTIAL

ASQ112989

Protocol: ASQ112989  
 Population: Modified intent-to-treat

Page 1 of 1

Table 2.19

SOBDA Responsiveness: Analysis of SOBDA Treatment Week 5 Score by PGAC Response at Study Day 36

|                                                         | PGAC response at study day 36 [5] |                               |
|---------------------------------------------------------|-----------------------------------|-------------------------------|
|                                                         | Responders                        | Non-Responders                |
| n [1]                                                   | 77                                | 200                           |
| Change in SOBDA Summary Score from week 4 to week 5 [2] | -0.09 (0.022)                     | 0.04 (0.014)                  |
| Comparison with responders                              | Responsiveness statistic [3]      | 0.6                           |
| Comparison with responders [4]                          | Difference<br>95% CI<br>p-value   | 0.13<br>(0.08,0.18)<br><0.001 |

213

CONFIDENTIAL

ASQ112989

[1] Number of subjects with change in SOBDA score from baseline or previous week.  
 [2] Least squares mean (standard error)  
 [3] Unadjusted difference between responders and non-responders, divided by the standard deviation of non-responders.  
 [4] Analysis of covariance adjusted for age, gender and SOBDA Treatment Week 4 score.  
 [5] A PGAC responder is defined as a subject who had a response of "better" or "much better".  
 A PGAC non-responder is defined as a subject who had a response of "much worse", "worse" or "no change".  
 sam31676: /arenv/arprod/ccil8781\_gr33343/asq112989/final/drivers/sobda\_t019f.sas 12OCT2011 16:04

Protocol: ASQ112989  
 Population: Modified intent-to-treat

Page 1 of 1

Table 2.20

SOBDA Responsiveness: Summary of SOBDA Treatment Week 6 Score by PGAC Response at Study Day 43

|                                                     |                          | PGAC response at study day 43 [1] |                |
|-----------------------------------------------------|--------------------------|-----------------------------------|----------------|
|                                                     |                          | Responders                        | Non-Responders |
| Number of subjects in category                      |                          | 38                                | 96             |
| SOBDA treatment week 6 score                        | n                        | 34                                | 89             |
|                                                     | Mean                     | 1.83                              | 2.08           |
|                                                     | SD                       | 0.765                             | 0.810          |
|                                                     | Median                   | 1.75                              | 2.03           |
|                                                     | Min                      | 1.0                               | 1.0            |
|                                                     | Max                      | 4.0                               | 4.0            |
| Change in SOBDA Summary Score from week 5 to week 6 | n                        | 31                                | 88             |
|                                                     | Mean                     | -0.04                             | 0.02           |
|                                                     | SD                       | 0.167                             | 0.240          |
|                                                     | Median                   | -0.02                             | 0.00           |
|                                                     | Min                      | -0.5                              | -0.8           |
|                                                     | Max                      | 0.2                               | 1.4            |
|                                                     | Mean percentage change   | -2.66                             | 1.51           |
|                                                     | Standardised effect size | -0.06                             | 0.03           |

[1] A PGAC responder is defined as a subject who had a response of "better" or "much better". A PGAC non-responder is defined as a subject who had a response of "much worse", "worse" or "no change". N.B. The standardised effect size is defined as the difference between the mean baseline and mean post-treatment value divided by the standard deviation of the baseline scores.  
 sam31676: /arenv/arprod/ccil8781\_gr33343/asq112989/final/drivers/sobda\_t020f.sas 12OCT2011 16:04

CONFIDENTIAL

ASQ112989

Protocol: ASQ112989  
 Population: Modified intent-to-treat

Page 1 of 1

Table 2.21

SOBDA Responsiveness: Analysis of SOBDA Treatment Week 6 Score by PGAC Response at Study Day 43

|                                                         | PGAC response at study day 43 [5] |                |
|---------------------------------------------------------|-----------------------------------|----------------|
|                                                         | Responders                        | Non-Responders |
| n [1]                                                   | 31                                | 88             |
| Change in SOBDA Summary Score from week 5 to week 6 [2] | -0.04 (0.040)                     | 0.02 (0.023)   |
| Comparison with responders                              | Responsiveness statistic [3]      | 0.3            |
| Comparison with responders [4]                          | Difference                        | 0.06           |
|                                                         | 95% CI                            | (-0.03,0.15)   |
|                                                         | p-value                           | 0.180          |

215

CONFIDENTIAL

ASQ112989

[1] Number of subjects with change in SOBDA score from baseline or previous week.  
 [2] Least squares mean (standard error)  
 [3] Unadjusted difference between responders and non-responders, divided by the standard deviation of non-responders.  
 [4] Analysis of covariance adjusted for age, gender and SOBDA Treatment Week 5 score.  
 [5] A PGAC responder is defined as a subject who had a response of "better" or "much better".  
 A PGAC non-responder is defined as a subject who had a response of "much worse", "worse" or "no change".  
 sam31676: /arenv/arprod/ccil8781\_gr33343/asq112989/final/drivers/sobda\_t021f.sas 12OCT2011 16:04

Protocol: ASQ112989  
 Population: Modified intent-to-treat

Page 1 of 1

Table 2.22

SOBDA Responsiveness: Summary of SOBDA Last Treatment Week Score by PGAC Response at Visit 3

|                                                         |                          | PGAC response at visit 3/PD [1] |                |
|---------------------------------------------------------|--------------------------|---------------------------------|----------------|
|                                                         |                          | Responders                      | Non-Responders |
| Number of subjects in category                          |                          | 50                              | 117            |
| SOBDA last treatment week score                         | n                        | 45                              | 110            |
|                                                         | Mean                     | 1.81                            | 1.96           |
|                                                         | SD                       | 0.803                           | 0.675          |
|                                                         | Median                   | 1.67                            | 1.98           |
|                                                         | Min                      | 1.0                             | 1.0            |
|                                                         | Max                      | 4.0                             | 3.3            |
| Change from baseline to SOBDA last treatment week score | n                        | 45                              | 106            |
|                                                         | Mean                     | -0.21                           | -0.14          |
|                                                         | SD                       | 0.497                           | 0.423          |
|                                                         | Median                   | -0.08                           | -0.09          |
|                                                         | Min                      | -1.6                            | -1.7           |
|                                                         | Max                      | 0.9                             | 1.1            |
|                                                         | Mean percentage change   | -9.82                           | -4.86          |
|                                                         | Standardised effect size | -0.30                           | -0.19          |

[1] A PGAC responder is defined as a subject who had a response of "better" or "much better". A PGAC non-responder is defined as a subject who had a response of "much worse", "worse" or "no change". N.B. The standardised effect size is defined as the difference between the mean baseline and mean post-treatment value divided by the standard deviation of the baseline scores.  
 sam31676: /arenv/arprod/ccil8781\_gr33343/asq112989/final/drivers/sobda\_t022f.sas 12OCT2011 16:04

CONFIDENTIAL

ASQ112989



Protocol: ASQ112989  
 Population: Modified intent-to-treat

Page 1 of 1

Table 2.23

SOBDA Responsiveness: Analysis of SOBDA Last Treatment Week Score by PGAC Response at Visit 3

|                                                       | PGAC response at visit 3/PD [5] |                |
|-------------------------------------------------------|---------------------------------|----------------|
|                                                       | Responders                      | Non-Responders |
| n [1]                                                 | 45                              | 106            |
| Change from baseline to SOBDA last treatment week [2] | -0.23 (0.063)                   | -0.15 (0.042)  |
| Comparison with responders                            | Responsiveness statistic [3]    | 0.2            |
| Comparison with responders [4]                        | Difference                      | 0.08           |
|                                                       | 95% CI                          | (-0.07,0.23)   |
|                                                       | p-value                         | 0.307          |

217

CONFIDENTIAL

ASQ112989

[1] Number of subjects with change in SOBDA score from baseline or previous week.  
 [2] Least squares mean (standard error)  
 [3] Unadjusted difference between responders and non-responders, divided by the standard deviation of non-responders.  
 [4] Analysis of covariance adjusted for age, gender and SOBDA baseline score.  
 [5] A PGAC responder is defined as a subject who had a response of "better" or "much better".  
 A PGAC non-responder is defined as a subject who had a response of "much worse", "worse" or "no change".  
 sam31676: /arenv/arprod/ccil8781\_gr33343/asq112989/final/drivers/sobda\_t023f.sas 12OCT2011 16:04

Protocol: ASQ112989  
 Population: Modified intent-to-treat

Page 1 of 1

Table 2.24

SOBDA Responsiveness: Summary of SOBDA Last Treatment Week Score by CGI-C Response at Visit 3

|                                                         |                          | CGI-C response at visit 3/PD [1] |                |
|---------------------------------------------------------|--------------------------|----------------------------------|----------------|
|                                                         |                          | Responders                       | Non-Responders |
| Number of subjects in category                          |                          | 140                              | 218            |
| SOBDA last treatment week score                         | n                        | 127                              | 192            |
|                                                         | Mean                     | 1.81                             | 2.16           |
|                                                         | SD                       | 0.691                            | 0.758          |
|                                                         | Median                   | 1.77                             | 2.09           |
|                                                         | Min                      | 1.0                              | 1.0            |
|                                                         | Max                      | 3.9                              | 4.0            |
| Change from baseline to SOBDA last treatment week score | n                        | 120                              | 181            |
|                                                         | Mean                     | -0.25                            | -0.03          |
|                                                         | SD                       | 0.484                            | 0.413          |
|                                                         | Median                   | -0.21                            | 0.00           |
|                                                         | Min                      | -1.7                             | -1.7           |
|                                                         | Max                      | 1.3                              | 1.4            |
|                                                         | Mean percentage change   | -11.03                           | -0.25          |
|                                                         | Standardised effect size | -0.38                            | -0.04          |

[1] A CGI-C responder is defined as a subject who had a response of "better" or "much better".  
 A CGI-C non-responder is defined as a subject who had a response of "much worse", "worse" or "no change".  
 N.B. The standardised effect size is defined as the difference between the mean baseline and mean post-treatment value divided by the standard deviation of the baseline scores.  
 sam31676: /arenv/arprod/ccil8781\_gr33343/asq112989/final/drivers/sobda\_t024f.sas 12OCT2011 16:05

Protocol: ASQ112989  
 Population: Modified intent-to-treat

Page 1 of 1

Table 2.25

SOBDA Responsiveness: Analysis of SOBDA Last Treatment Week Score by CGI-C Response at Visit 3

|                                                       | CGI-C response at visit 3/PD [5] |                               |
|-------------------------------------------------------|----------------------------------|-------------------------------|
|                                                       | Responders                       | Non-Responders                |
| n [1]                                                 | 120                              | 181                           |
| Change from baseline to SOBDA last treatment week [2] | -0.27 (0.040)                    | -0.03 (0.033)                 |
| Comparison with responders                            | Responsiveness statistic [3]     | 0.5                           |
| Comparison with responders [4]                        | Difference<br>95% CI<br>p-value  | 0.24<br>(0.14,0.34)<br><0.001 |

219

CONFIDENTIAL

ASQ112989

[1] Number of subjects with change from baseline SOBDA score.  
 [2] Least squares mean (standard error)  
 [3] Unadjusted difference between responders and non-responders, divided by the standard deviation of non-responders.  
 [4] Analysis of covariance adjusted for age, gender and SOBDA baseline score.  
 [5] A CGI-C responder is defined as a subject who had a response of "better" or "much better".  
 A CGI-C non-responder is defined as a subject who had a response of "much worse", "worse" or "no change".  
 sam31676: /arenv/arprod/ccil8781\_gr33343/asq112989/final/drivers/sobda\_t025f.sas 12OCT2011 16:05

Protocol: ASQ112989

Page 1 of 1

Population: Modified intent-to-treat

Table 2.26

SOBDA Responsiveness: Summary of SOBDA Last Treatment Week Score by CRQ-SAS Dyspnoea Domain Response at Visit 3

|                                                         |                          | CRQ-SAS Dyspnoea Domain response at visit 3/PD [1] |                |
|---------------------------------------------------------|--------------------------|----------------------------------------------------|----------------|
|                                                         |                          | Responders                                         | Non-Responders |
| Number of subjects in category                          |                          | 143                                                | 215            |
| SOBDA last treatment week score                         | n                        | 127                                                | 192            |
|                                                         | Mean                     | 1.90                                               | 2.10           |
|                                                         | SD                       | 0.729                                              | 0.756          |
|                                                         | Median                   | 1.82                                               | 2.07           |
|                                                         | Min                      | 1.0                                                | 1.0            |
|                                                         | Max                      | 4.0                                                | 4.0            |
| Change from baseline to SOBDA last treatment week score | n                        | 117                                                | 184            |
|                                                         | Mean                     | -0.32                                              | 0.01           |
|                                                         | SD                       | 0.446                                              | 0.416          |
|                                                         | Median                   | -0.30                                              | 0.00           |
|                                                         | Min                      | -1.7                                               | -1.7           |
|                                                         | Max                      | 0.9                                                | 1.4            |
|                                                         | Mean percentage change   | -14.05                                             | 1.49           |
|                                                         | Standardised effect size | -0.46                                              | 0.01           |

[1] A CRQ-SAS dyspnoea domain responder is defined as a subject who had a change in score for the dyspnoea domain of the CRQ-SAS between Visit 2 and Visit 3/PD of 0.5 units or more. A CRQ-SAS dyspnoea domain non-responder is defined as a subject who had a change in score of less than 0.5 units.

N.B. CRQ-SAS dyspnoea domain score is calculated as the mean of responses to questions 1 to 5, and is calculated if at least one response was recorded.

N.B. The standardised effect size is defined as the difference between the mean baseline and mean post-treatment value divided by the standard deviation of the baseline scores.

sam31676: /arenv/arprod/ccil8781\_gr33343/asq112989/final/drivers/sobda\_t026f.sas 12OCT2011 16:05

CONFIDENTIAL

ASQ112989

Protocol: ASQ112989  
 Population: Modified intent-to-treat

Page 1 of 1

Table 2.27  
 SOBDA Responsiveness: Analysis of SOBDA Last Treatment Week Score by CRQ-SAS Dyspnoea Domain Response at Visit 3

|                                                                   | CRQ-SAS Dyspnoea Responders | Domain response at visit 3/PD [5] Non-Responders |
|-------------------------------------------------------------------|-----------------------------|--------------------------------------------------|
| n [1]                                                             | 117                         | 184                                              |
| Change from baseline to SOBDA last treatment week [2]             | -0.31 (0.039)               | -0.01 (0.031)                                    |
| Comparison with responders<br>Responsiveness statistic [3]        |                             | 0.8                                              |
| Comparison with responders [4]<br>Difference<br>95% CI<br>p-value |                             | 0.30<br>(0.21,0.40)<br><0.001                    |

221

[1] Number of subjects with change from baseline SOBDA score.  
 [2] Least squares mean (standard error)  
 [3] Unadjusted difference between responders and non-responders / standard deviation of non-responders.  
 [4] Analysis of covariance adjusted for age, gender and SOBDA baseline score.  
 [5] A CRQ-SAS dyspnoea domain responder is defined as a subject who had a change in score for the dyspnoea domain of the CRQ-SAS between Visit 2 and Visit 3/PD of 0.5 units or more. A CRQ-SAS dyspnoea domain non-responder is defined as a subject who had a change in score of less than 0.5 units.  
 N.B. CRQ-SAS dyspnoea domain score is calculated as the mean of responses to questions 1 to 5, and is calculated if at least one response was recorded.  
 sam31676: /arenv/arprod/ccil8781\_gr33343/asq112989/final/drivers/sobda\_t027f.sas 12OCT2011 16:05

CONFIDENTIAL

ASQ112989

Protocol: ASQ112989

Page 1 of 1

Population: Modified intent-to-treat

Table 2.28

SOBDA Responsiveness: Summary of SOBDA Last Treatment Week Score by Physician-Completed mMRC Response at Visit 3

|                                                         |                          | Physician-completed mMRC response at visit 3/PD [1] |                |
|---------------------------------------------------------|--------------------------|-----------------------------------------------------|----------------|
|                                                         |                          | Responders                                          | Non-Responders |
| Number of subjects in category                          |                          | 104                                                 | 253            |
| SOBDA last treatment week score                         | n                        | 97                                                  | 221            |
|                                                         | Mean                     | 1.89                                                | 2.08           |
|                                                         | SD                       | 0.754                                               | 0.744          |
|                                                         | Median                   | 1.82                                                | 2.02           |
|                                                         | Min                      | 1.0                                                 | 1.0            |
|                                                         | Max                      | 4.0                                                 | 4.0            |
| Change from baseline to SOBDA last treatment week score | n                        | 91                                                  | 210            |
|                                                         | Mean                     | -0.13                                               | -0.11          |
|                                                         | SD                       | 0.416                                               | 0.472          |
|                                                         | Median                   | -0.12                                               | -0.04          |
|                                                         | Min                      | -1.5                                                | -1.7           |
|                                                         | Max                      | 1.4                                                 | 1.3            |
|                                                         | Mean percentage change   | -6.74                                               | -3.60          |
|                                                         | Standardised effect size | -0.20                                               | -0.16          |

[1] A physician-completed mMRC responder is defined as a subject who had a change in score between Visit 2 and Visit 3/PD of 1 unit or more. A physician-completed mMRC non-responder is defined as a subject who had a change of less than 1 unit.

N.B. The standardised effect size is defined as the difference between the mean baseline and mean post-treatment value divided by the standard deviation of the baseline scores.

sam31676: /arenv/arprod/ccil8781\_gr33343/asq112989/final/drivers/sobda\_t028f.sas 12OCT2011 16:05

CONFIDENTIAL

ASQ112989

Protocol: ASQ112989  
 Population: Modified intent-to-treat

Page 1 of 1

Table 2.29  
 SOBDA Responsiveness: Analysis of SOBDA Last Treatment Week Score by Physician-Completed mMRC Response at Visit 3

|                                                       |                              | Physician-completed mMRC response at visit 3/PD [5] |                |
|-------------------------------------------------------|------------------------------|-----------------------------------------------------|----------------|
|                                                       |                              | Responders                                          | Non-Responders |
| -----                                                 |                              |                                                     |                |
| n [1]                                                 |                              | 91                                                  | 210            |
| Change from baseline to SOBDA last treatment week [2] |                              | -0.15 (0.047)                                       | -0.12 (0.031)  |
| Comparison with responders                            | Responsiveness statistic [3] |                                                     | 0.0            |
| Comparison with responders [4]                        | Difference                   |                                                     | 0.03           |
|                                                       | 95% CI                       |                                                     | (-0.08,0.15)   |
|                                                       | p-value                      |                                                     | 0.535          |

223

[1] Number of subjects with change from baseline SOBDA score.  
 [2] Least squares mean (standard error)  
 [3] Unadjusted difference between responders and non-responders, divided by the standard deviation of non-responders.  
 [4] Analysis of covariance adjusted for age, gender and SOBDA baseline score.  
 [5] A physician-completed mMRC responder is defined as a subject who had a change in score between Visit 2 and Visit 3/PD of 1 unit or more. A physician-completed mMRC non-responder is defined as a subject who had a change of less than 1 unit.  
 sam31676: /arenv/arprod/ccil8781\_gr33343/asq112989/final/drivers/sobda\_t029f.sas 12OCT2011 16:05

CONFIDENTIAL

ASQ112989

Protocol: ASQ112989  
Population: Modified intent-to-treat

Page 1 of 1

Table 2.30  
SOBDA Responsiveness: Summary of SOBDA Last Treatment Week Score by Participant-Completed mMRC Response at Visit 3

|                                                         |                          | Participant-completed mMRC response at visit 3/PD [1] |                |
|---------------------------------------------------------|--------------------------|-------------------------------------------------------|----------------|
|                                                         |                          | Responders                                            | Non-Responders |
| Number of subjects in category                          |                          | 108                                                   | 250            |
| SOBDA last treatment week score                         | n                        | 96                                                    | 223            |
|                                                         | Mean                     | 2.00                                                  | 2.03           |
|                                                         | SD                       | 0.804                                                 | 0.728          |
|                                                         | Median                   | 1.92                                                  | 2.00           |
|                                                         | Min                      | 1.0                                                   | 1.0            |
|                                                         | Max                      | 4.0                                                   | 4.0            |
| Change from baseline to SOBDA last treatment week score | n                        | 92                                                    | 209            |
|                                                         | Mean                     | -0.18                                                 | -0.09          |
|                                                         | SD                       | 0.508                                                 | 0.428          |
|                                                         | Median                   | -0.16                                                 | -0.03          |
|                                                         | Min                      | -1.6                                                  | -1.7           |
|                                                         | Max                      | 1.4                                                   | 1.1            |
|                                                         | Mean percentage change   | -8.01                                                 | -3.03          |
|                                                         | Standardised effect size | -0.26                                                 | -0.13          |

[1] A participant-completed mMRC responder is defined as a subject who had a change in score between Visit 2 and Visit 3/PD of 1 unit or more. A participant-completed mMRC non-responder is defined as a subject who had a change of less than 1 unit.

N.B. The standardised effect size is defined as the difference between the mean baseline and mean post-treatment value divided by the standard deviation of the baseline scores.

sam31676: /arenv/arprod/ccil8781\_gr33343/asq112989/final/drivers/sobda\_t030f.sas 12OCT2011 16:05

CONFIDENTIAL

ASQ112989



Protocol: ASQ112989  
 Population: Modified intent-to-treat

Page 1 of 1

Table 2.31

SOBDA Responsiveness: Analysis of SOBDA Last Treatment Week Score by Participant-Completed mMRC Response at Visit 3

|                                                       | Participant-completed mMRC response at visit 3/PD [5] |                               |
|-------------------------------------------------------|-------------------------------------------------------|-------------------------------|
|                                                       | Responders                                            | Non-Responders                |
| n [1]                                                 | 92                                                    | 209                           |
| Change from baseline to SOBDA last treatment week [2] | -0.19 (0.046)                                         | -0.10 (0.031)                 |
| Comparison with responders                            | Responsiveness statistic [3]                          | 0.2                           |
| Comparison with responders [4]                        | Difference<br>95% CI<br>p-value                       | 0.08<br>(-0.02,0.19)<br>0.129 |

225

[1] Number of subjects with change from baseline SOBDA score.  
 [2] Least squares mean (standard error)  
 [3] Unadjusted difference between responders and non-responders, divided by the standard deviation of non-responders.  
 [4] Analysis of covariance adjusted for age, gender and SOBDA baseline score.  
 [5] A participant-completed mMRC responder is defined as a subject who had a change in score between Visit 2 and Visit 3/PD of 1 unit or more. A participant-completed mMRC non-responder is defined as a subject who had a change of less than 1 unit.  
 sam31676: /arenv/arprod/ccil8781\_gr33343/asq112989/final/drivers/sobda\_t031f.sas 12OCT2011 16:05

CONFIDENTIAL

ASQ112989

Protocol: ASQ112989

Page 1 of 1

Population: Modified Intent-to-treat

Table 2.32

SOBDA Threshold for Response: Summary of SOBDA Treatment Week 1 Score by PGAC Response Category at Study Day 8

|                                                       |        | -----PGAC at study day 8 [1]----- |       |       |       |       |
|-------------------------------------------------------|--------|-----------------------------------|-------|-------|-------|-------|
|                                                       |        | 1                                 | 2     | 3     | 4     | 5     |
| Number of subjects in category                        |        | 2                                 | 32    | 176   | 106   | 9     |
| SOBDA treatment week 1 score                          | n      | 2                                 | 29    | 169   | 101   | 8     |
|                                                       | Mean   | 2.51                              | 2.35  | 2.09  | 1.94  | 1.46  |
|                                                       | SD     | 0.285                             | 0.648 | 0.672 | 0.744 | 0.334 |
|                                                       | Median | 2.51                              | 2.37  | 2.10  | 1.86  | 1.52  |
|                                                       | Min    | 2.3                               | 1.3   | 1.0   | 1.0   | 1.0   |
| Change in SOBDA Summary Score from baseline to week 1 | Max    | 2.7                               | 3.6   | 3.8   | 4.0   | 2.0   |
|                                                       | n      | 2                                 | 28    | 158   | 97    | 8     |
|                                                       | Mean   | 0.60                              | 0.10  | -0.04 | -0.26 | -0.28 |
|                                                       | SD     | 0.398                             | 0.322 | 0.225 | 0.325 | 0.343 |
|                                                       | Median | 0.60                              | 0.05  | 0.01  | -0.21 | -0.07 |
| Min                                                   | 0.3    | -0.5                              | -1.1  | -1.3  | -0.8  |       |
| Max                                                   | 0.9    | 0.9                               | 0.4   | 0.5   | -0.0  |       |

[1] 1 = 'Much worse'; 2 = 'Worse'; 3 = 'No change'; 4 = 'Better'; 5 = 'Much better'

sam31676: /arenv/arprod/ccil8781\_gr33343/asq112989/final/drivers/sobda\_t032f.sas 12OCT2011 16:05

CONFIDENTIAL

ASQ112989

Protocol: ASQ112989

Page 1 of 1

Population: Modified Intent-to-treat

Table 2.33

SOBDA Threshold for Response: Summary of SOBDA Treatment Week 2 Score by PGAC Response Category at Study Day 15

|                                                     |        | -----PGAC at study day 15 [1]----- |       |       |       |       |
|-----------------------------------------------------|--------|------------------------------------|-------|-------|-------|-------|
|                                                     |        | 1                                  | 2     | 3     | 4     | 5     |
| Number of subjects in category                      |        | 4                                  | 39    | 179   | 89    | 9     |
| SOBDA treatment week 2 score                        | n      | 4                                  | 39    | 173   | 85    | 9     |
|                                                     | Mean   | 2.88                               | 2.33  | 2.07  | 1.81  | 1.53  |
|                                                     | SD     | 1.016                              | 0.684 | 0.748 | 0.646 | 0.585 |
|                                                     | Median | 3.17                               | 2.34  | 2.07  | 1.73  | 1.44  |
|                                                     | Min    | 1.5                                | 1.1   | 1.0   | 1.0   | 1.0   |
| Change in SOBDA Summary Score from week 1 to week 2 | Max    | 3.7                                | 3.9   | 4.0   | 3.8   | 2.9   |
|                                                     | n      | 4                                  | 39    | 169   | 82    | 9     |
|                                                     | Mean   | 0.31                               | 0.05  | -0.00 | -0.08 | -0.32 |
|                                                     | SD     | 0.375                              | 0.196 | 0.220 | 0.219 | 0.581 |
|                                                     | Median | 0.23                               | 0.04  | 0.00  | -0.04 | -0.15 |
| Min                                                 | -0.1   | -0.3                               | -1.1  | -0.8  | -1.8  |       |
| Max                                                 | 0.8    | 0.5                                | 1.0   | 0.6   | 0.2   |       |

[1] 1 = 'Much worse'; 2 = 'Worse'; 3 = 'No change'; 4 = 'Better'; 5 = 'Much better'  
 sam31676: /arenv/arprod/ccil8781\_gr33343/asq112989/final/drivers/sobda\_t033f.sas 12OCT2011 16:05

227

CONFIDENTIAL

ASQ112989

Protocol: ASQ112989

Page 1 of 1

Population: Modified Intent-to-treat

Table 2.34

SOBDA Threshold for Response: Summary of SOBDA Treatment Week 3 Score by PGAC Response Category at Study Day 22

|                                                     |        | -----PGAC at study day 22 [1]----- |       |       |       |       |
|-----------------------------------------------------|--------|------------------------------------|-------|-------|-------|-------|
|                                                     |        | 1                                  | 2     | 3     | 4     | 5     |
| Number of subjects in category                      |        | 6                                  | 45    | 176   | 77    | 13    |
| SOBDA treatment week 3 score                        | n      | 6                                  | 44    | 170   | 72    | 13    |
|                                                     | Mean   | 2.93                               | 2.49  | 2.04  | 1.77  | 1.47  |
|                                                     | SD     | 1.185                              | 0.672 | 0.700 | 0.674 | 0.551 |
|                                                     | Median | 3.29                               | 2.43  | 2.02  | 1.68  | 1.30  |
|                                                     | Min    | 1.2                                | 1.1   | 1.0   | 1.0   | 1.0   |
|                                                     | Max    | 4.0                                | 3.7   | 3.7   | 4.0   | 2.8   |
| Change in SOBDA Summary Score from week 2 to week 3 | n      | 6                                  | 43    | 167   | 70    | 13    |
|                                                     | Mean   | 0.17                               | 0.08  | -0.00 | -0.08 | -0.06 |
|                                                     | SD     | 0.253                              | 0.220 | 0.164 | 0.216 | 0.264 |
|                                                     | Median | 0.08                               | 0.07  | 0.00  | -0.06 | -0.04 |
|                                                     | Min    | -0.1                               | -0.3  | -0.8  | -0.8  | -0.5  |
|                                                     | Max    | 0.6                                | 0.7   | 0.4   | 0.6   | 0.6   |

[1] 1 = 'Much worse'; 2 = 'Worse'; 3 = 'No change'; 4 = 'Better'; 5 = 'Much better'

sam31676: /arenv/arprod/ccil8781\_gr33343/asq112989/final/drivers/sobda\_t034f.sas 12OCT2011 16:10

CONFIDENTIAL

ASQ112989

Protocol: ASQ112989  
 Population: Modified Intent-to-treat

Page 1 of 1

Table 2.35

SOBDA Threshold for Response: Summary of SOBDA Treatment Week 4 Score by PGAC Response Category at Study Day 29

|                                                     |        | -----PGAC at study day 29 [1]----- |       |       |       |       |
|-----------------------------------------------------|--------|------------------------------------|-------|-------|-------|-------|
|                                                     |        | 1                                  | 2     | 3     | 4     | 5     |
| Number of subjects in category                      |        | 3                                  | 39    | 194   | 54    | 14    |
| SOBDA treatment week 4 score                        | n      | 3                                  | 37    | 186   | 50    | 13    |
|                                                     | Mean   | 3.91                               | 2.46  | 2.03  | 1.69  | 1.43  |
|                                                     | SD     | 0.123                              | 0.667 | 0.704 | 0.697 | 0.467 |
|                                                     | Median | 3.96                               | 2.44  | 1.96  | 1.40  | 1.35  |
|                                                     | Min    | 3.8                                | 1.2   | 1.0   | 1.0   | 1.0   |
| Change in SOBDA Summary Score from week 3 to week 4 | Max    | 4.0                                | 3.8   | 3.7   | 4.0   | 2.6   |
|                                                     | n      | 3                                  | 34    | 186   | 49    | 13    |
|                                                     | Mean   | 0.12                               | 0.10  | -0.01 | -0.10 | -0.04 |
|                                                     | SD     | 0.131                              | 0.289 | 0.167 | 0.216 | 0.097 |
|                                                     | Median | 0.07                               | 0.06  | 0.00  | -0.05 | -0.01 |
| Min                                                 | 0.0    | -0.3                               | -0.7  | -0.8  | -0.3  |       |
| Max                                                 | 0.3    | 1.3                                | 0.5   | 0.4   | 0.1   |       |

[1] 1 = 'Much worse'; 2 = 'Worse'; 3 = 'No change'; 4 = 'Better'; 5 = 'Much better'  
 sam31676: /arenv/arprod/ccil8781\_gr33343/asq112989/final/drivers/sobda\_t035f.sas 12OCT2011 16:05

229

For peer review only

Protocol: ASQ112989

Page 1 of 1

Population: Modified Intent-to-treat

Table 2.36

SOBDA Threshold for Response: Summary of SOBDA Treatment Week 5 Score by PGAC Response Category at Study Day 36

|                                                     |        | -----PGAC at study day 36 [1]----- |       |       |       |       |
|-----------------------------------------------------|--------|------------------------------------|-------|-------|-------|-------|
|                                                     |        | 1                                  | 2     | 3     | 4     | 5     |
| Number of subjects in category                      |        | 0                                  | 47    | 172   | 67    | 12    |
| SOBDA treatment week 5 score                        | n      | 0                                  | 45    | 158   | 66    | 11    |
|                                                     | Mean   |                                    | 2.51  | 2.06  | 1.72  | 1.28  |
|                                                     | SD     |                                    | 0.752 | 0.731 | 0.649 | 0.320 |
|                                                     | Median |                                    | 2.41  | 2.05  | 1.49  | 1.32  |
|                                                     | Min    |                                    | 1.2   | 1.0   | 1.0   | 1.0   |
| Change in SOBDA Summary Score from week 4 to week 5 | Max    |                                    | 4.0   | 4.0   | 3.6   | 2.0   |
|                                                     | n      | 0                                  | 45    | 155   | 66    | 11    |
|                                                     | Mean   |                                    | 0.06  | 0.03  | -0.08 | -0.05 |
|                                                     | SD     |                                    | 0.171 | 0.169 | 0.255 | 0.171 |
|                                                     | Median |                                    | 0.03  | 0.00  | -0.01 | -0.03 |
| Min                                                 |        | -0.4                               | -0.6  | -1.5  | -0.4  |       |
| Max                                                 |        | 0.6                                | 0.6   | 0.2   | 0.3   |       |

230

CONFIDENTIAL

ASQ112989

[1] 1 = 'Much worse'; 2 = 'Worse'; 3 = 'No change'; 4 = 'Better'; 5 = 'Much better'  
 sam31676: /arenv/arprod/ccil8781\_gr33343/asq112989/final/drivers/sobda\_t036f.sas 12OCT2011 16:05

Protocol: ASQ112989  
 Population: Modified Intent-to-treat

Page 1 of 1

Table 2.37

SOBDA Threshold for Response: Summary of SOBDA Treatment Week 6 Score by PGAC Response Category at Study Day 43

|                                                     |        | -----PGAC at study day 43 [1]----- |       |       |       |       |
|-----------------------------------------------------|--------|------------------------------------|-------|-------|-------|-------|
|                                                     |        | 1                                  | 2     | 3     | 4     | 5     |
| Number of subjects in category                      |        | 4                                  | 10    | 82    | 31    | 7     |
| SOBDA treatment week 6 score                        | n      | 4                                  | 10    | 75    | 29    | 5     |
|                                                     | Mean   | 3.61                               | 2.17  | 1.99  | 1.86  | 1.68  |
|                                                     | SD     | 0.289                              | 0.762 | 0.755 | 0.775 | 0.770 |
|                                                     | Median | 3.57                               | 2.17  | 1.84  | 1.79  | 1.38  |
|                                                     | Min    | 3.3                                | 1.0   | 1.0   | 1.0   | 1.0   |
| Change in SOBDA Summary Score from week 5 to week 6 | Max    | 4.0                                | 3.7   | 3.2   | 4.0   | 3.0   |
|                                                     | n      | 4                                  | 10    | 74    | 26    | 5     |
|                                                     | Mean   | 0.25                               | 0.09  | 0.00  | -0.05 | -0.02 |
|                                                     | SD     | 0.354                              | 0.224 | 0.231 | 0.181 | 0.054 |
|                                                     | Median | 0.21                               | 0.04  | -0.00 | -0.01 | -0.02 |
| Min                                                 | -0.1   | -0.1                               | -0.8  | -0.5  | -0.1  |       |
| Max                                                 | 0.7    | 0.7                                | 1.4   | 0.2   | 0.0   |       |

231

CONFIDENTIAL

ASQ112989

[1] 1 = 'Much worse'; 2 = 'Worse'; 3 = 'No change'; 4 = 'Better'; 5 = 'Much better'  
 sam31676: /arenv/arprod/ccil8781\_gr33343/asq112989/final/drivers/sobda\_t037f.sas 12OCT2011 16:05

Protocol: ASQ112989  
 Population: Modified Intent-to-treat

Table 2.38

SOBDA Threshold for Response: Summary of SOBDA Last Treatment Week Score by CGI-C Response Category at Visit 3

|                                                         |        | CGI-C at visit 3/PD [1] |       |       |       |       |
|---------------------------------------------------------|--------|-------------------------|-------|-------|-------|-------|
|                                                         |        | 1                       | 2     | 3     | 4     | 5     |
| Number of subjects in category                          |        | 1                       | 32    | 185   | 128   | 12    |
| SOBDA last treatment week score                         | n      | 1                       | 28    | 163   | 116   | 11    |
|                                                         | Mean   | 3.08                    | 2.46  | 2.10  | 1.85  | 1.40  |
|                                                         | SD     |                         | 0.818 | 0.736 | 0.682 | 0.679 |
|                                                         | Median | 3.08                    | 2.19  | 2.06  | 1.81  | 1.03  |
|                                                         | Min    | 3.1                     | 1.2   | 1.0   | 1.0   | 1.0   |
|                                                         | Max    | 3.1                     | 4.0   | 4.0   | 3.9   | 2.8   |
| Change from baseline to SOBDA last treatment week score | n      | 1                       | 28    | 152   | 109   | 11    |
|                                                         | Mean   | 1.13                    | 0.26  | -0.09 | -0.25 | -0.32 |
|                                                         | SD     |                         | 0.354 | 0.391 | 0.484 | 0.504 |
|                                                         | Median | 1.13                    | 0.19  | -0.04 | -0.22 | -0.12 |
|                                                         | Min    | 1.1                     | -0.4  | -1.7  | -1.7  | -1.6  |
|                                                         | Max    | 1.1                     | 1.4   | 1.1   | 1.3   | 0.1   |

232

[1] 1 = 'Much worse'; 2 = 'Worse'; 3 = 'No change'; 4 = 'Better'; 5 = 'Much better'  
 sam31676: /arenv/arprod/ccil8781\_gr33343/asq112989/final/drivers/sobda\_t038f.sas 12OCT2011 16:05

CONFIDENTIAL

ASQ112989



Protocol: ASQ112989  
 Population: Modified Intent-to-treat

Page 1 of 1

Table 2.39

SOBDA Threshold for Response: Summary of SOBDA Last Treatment Week Score by CRQ-SAS Dyspnoea Domain 3-Point Response Category at Visit 3

|                                                         |        | CRQ-SAS Dyspnoea Domain Response Category at visit 3/PD [1] |       |       |
|---------------------------------------------------------|--------|-------------------------------------------------------------|-------|-------|
|                                                         |        | 1                                                           | 2     | 3     |
| Number of subjects in category                          |        | 147                                                         | 75    | 136   |
| SOBDA last treatment week score                         | n      | 130                                                         | 68    | 121   |
|                                                         | Mean   | 2.10                                                        | 2.08  | 1.90  |
|                                                         | SD     | 0.730                                                       | 0.805 | 0.731 |
|                                                         | Median | 2.09                                                        | 2.00  | 1.82  |
|                                                         | Min    | 1.0                                                         | 1.0   | 1.0   |
|                                                         | Max    | 4.0                                                         | 3.8   | 4.0   |
| Change from baseline to SOBDA last treatment week score | n      | 122                                                         | 68    | 111   |
|                                                         | Mean   | 0.07                                                        | -0.13 | -0.32 |
|                                                         | SD     | 0.401                                                       | 0.417 | 0.453 |
|                                                         | Median | 0.03                                                        | -0.08 | -0.28 |
|                                                         | Min    | -1.3                                                        | -1.7  | -1.7  |
|                                                         | Max    | 1.4                                                         | 0.9   | 0.9   |

[1] 1 = "No change or worse" (i.e. change of  $\leq 0$  units); 2 = "Better" (i.e. change of  $> 0-0.5$  units); 3 = "Much better" (i.e. change of  $> 0.5$  units).  
 N.B. CRQ-SAS dyspnoea domain score is calculated as the mean of responses to questions 1 to 5, and is calculated if at least one response was recorded.  
 sam31676: /arenv/arprod/ccil8781\_gr33343/asq112989/final/drivers/sobda\_t039f.sas 12OCT2011 16:05

233

For peer review only

Protocol: ASQ112989  
 Population: Modified Intent-to-treat

Page 1 of 1

Table 2.40  
 SOBDA Threshold for Response: Summary of SOBDA Last Treatment Week Score by FEV1 3-Point Response Category at Visit 3

|                                                         |        | FEV1 Response at visit 3/PD [1] |       |       |
|---------------------------------------------------------|--------|---------------------------------|-------|-------|
|                                                         |        | 1                               | 2     | 3     |
| Number of subjects in category                          |        | 163                             | 53    | 140   |
| SOBDA last treatment week score                         | n      | 147                             | 46    | 124   |
|                                                         | Mean   | 2.07                            | 2.00  | 1.96  |
|                                                         | SD     | 0.792                           | 0.675 | 0.733 |
|                                                         | Median | 2.01                            | 1.95  | 1.90  |
|                                                         | Min    | 1.0                             | 1.0   | 1.0   |
|                                                         | Max    | 4.0                             | 3.6   | 3.6   |
| Change from baseline to SOBDA last treatment week score | n      | 137                             | 42    | 120   |
|                                                         | Mean   | -0.04                           | -0.16 | -0.20 |
|                                                         | SD     | 0.459                           | 0.492 | 0.428 |
|                                                         | Median | 0.02                            | -0.17 | -0.13 |
|                                                         | Min    | -1.7                            | -1.7  | -1.6  |
|                                                         | Max    | 1.4                             | 1.3   | 1.1   |

[1] 1 = "No change or worse" (i.e. change of <50mL); 2 = "Better" (i.e. change of 50-<100mL); 3 = "Much better" (i.e. change of >=100mL).

sam31676: /arenv/arprod/ccil8781\_gr33343/asq112989/final/drivers/sobda\_t040f.sas 12OCT2011 16:05

CONFIDENTIAL

ASQ112989

Protocol: ASQ112989  
Population: Modified Intent-to-treat

Figure 3.01  
Cumulative Distribution Plot of Change from Baseline in SOBDA Last Treatment Week Score by Treatment  
Daily Mean Score: Rescored Response Categories

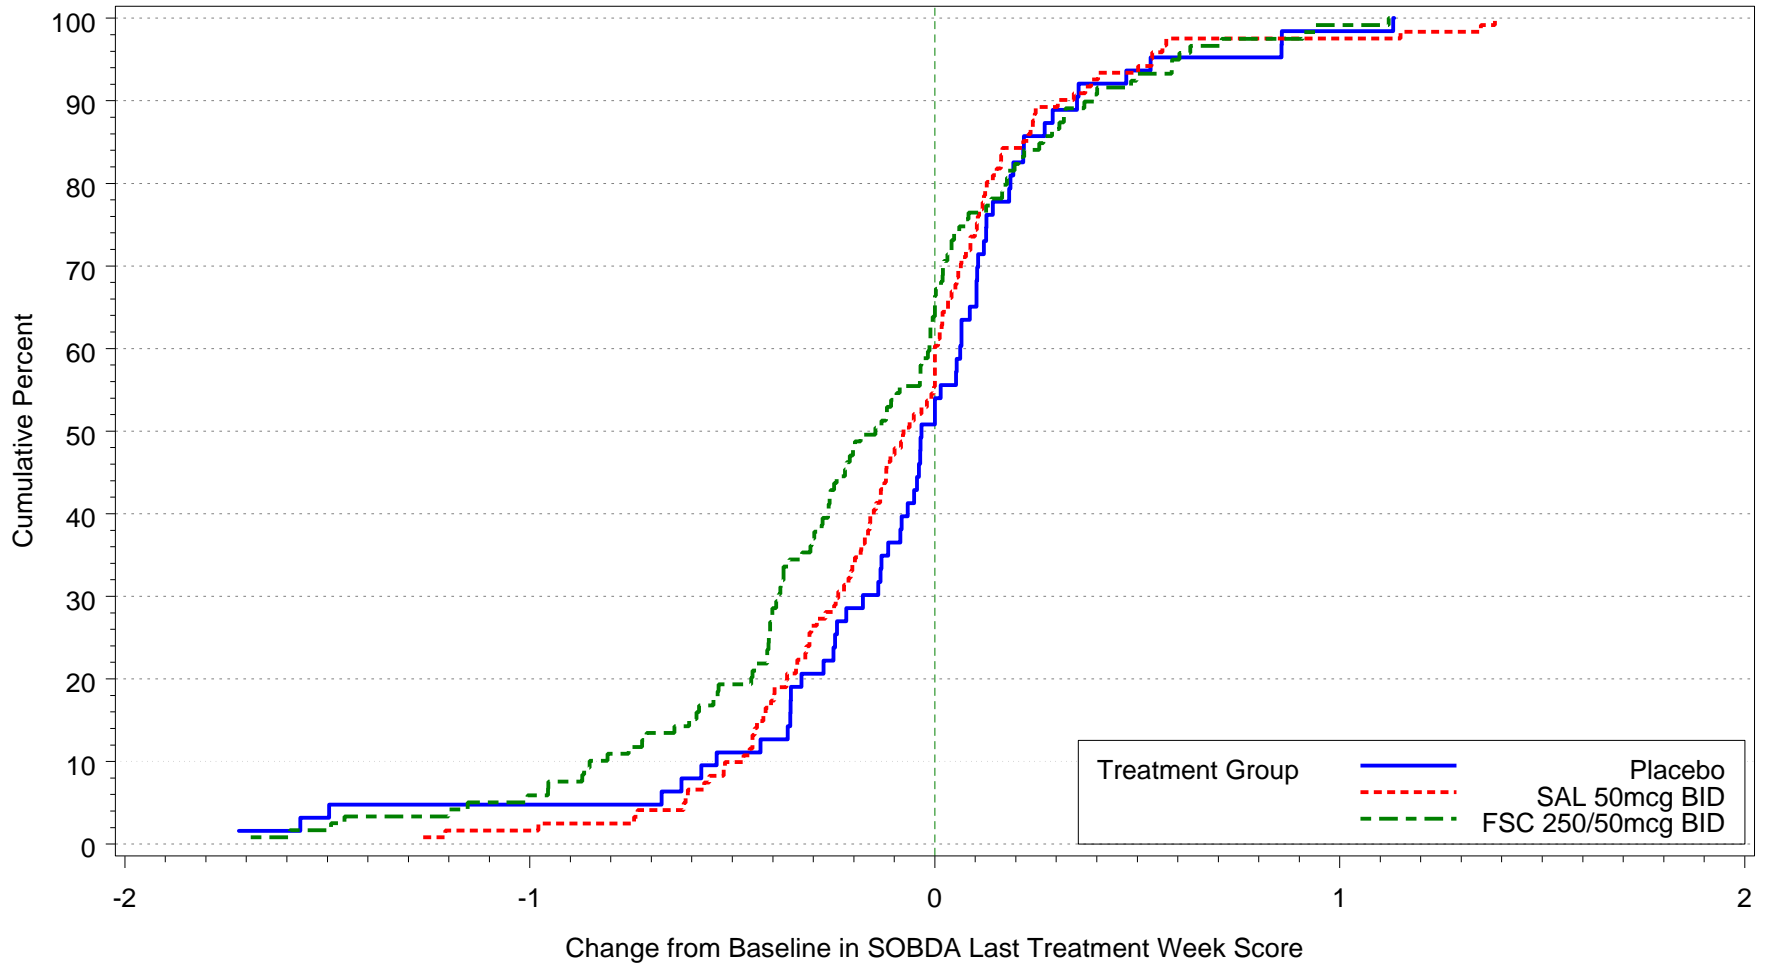

235

CONFIDENTIAL

ASQ112989

sam31676: /arenv/arprod/ci18781\_gr33343/asq112989/final/drivers/sobda\_f026b.sas 12OCT2011 15:08

Protocol: ASQ112989  
Population: Modified Intent-to-treat

Table 3.01  
Summary of Compliance with SOBDA Diary Completion

| Compliance (%) | Placebo<br>(N=75) | SAL 50mcg BID<br>(N=151) | FSC 250/50mcg<br>BID<br>(N=139) | Total<br>(N=365) |
|----------------|-------------------|--------------------------|---------------------------------|------------------|
| n              | 75                | 151                      | 139                             | 365              |
| Mean           | 88.3              | 88.9                     | 88.7                            | 88.7             |
| SD             | 12.36             | 13.66                    | 12.77                           | 13.03            |
| Median         | 91.2              | 94.0                     | 91.8                            | 92.9             |
| Min.           | 30                | 23                       | 0                               | 0                |
| Max.           | 98                | 98                       | 98                              | 98               |

236

Open peer review only

CONFIDENTIAL

ASQ112989

sam31676: /arenv/arprod/ccil8781\_gr33343/asq112989/final/drivers/sobda\_t041.sas 12OCT2011 14:42

Protocol: ASQ112989  
Population: Run-in

Page 1 of 3

Table 3.02  
Summary of SOBDA Summary Scores

|                           |        | Run-in failure (N=52) | Placebo (N=75) | SAL 50mcg BID (N=152) | FSC 250/50mcg BID (N=139) | Total (N=418) |
|---------------------------|--------|-----------------------|----------------|-----------------------|---------------------------|---------------|
| Baseline score            | n      | 25                    | 67             | 134                   | 130                       | 356           |
|                           | Mean   | 2.11                  | 2.07           | 2.22                  | 2.13                      | 2.15          |
|                           | SD     | 0.729                 | 0.605          | 0.767                 | 0.695                     | 0.709         |
|                           | Median | 2.14                  | 2.01           | 2.15                  | 2.16                      | 2.14          |
|                           | Min.   | 1.0                   | 1.0            | 1.0                   | 1.0                       | 1.0           |
|                           | Max.   | 3.1                   | 3.1            | 4.0                   | 3.8                       | 4.0           |
| Last treatment week score | n      |                       | 68             | 130                   | 123                       | 321           |
|                           | Mean   |                       | 1.98           | 2.14                  | 1.92                      | 2.02          |
|                           | SD     |                       | 0.659          | 0.781                 | 0.752                     | 0.750         |
|                           | Median |                       | 2.02           | 2.05                  | 1.84                      | 1.98          |
|                           | Min.   |                       | 1.0            | 1.0                   | 1.0                       | 1.0           |
|                           | Max.   |                       | 3.5            | 4.0                   | 3.8                       | 4.0           |
| Run-in week 1 score       | n      | 34                    | 67             | 138                   | 122                       | 361           |
|                           | Mean   | 1.86                  | 2.03           | 2.19                  | 2.07                      | 2.09          |
|                           | SD     | 0.675                 | 0.585          | 0.717                 | 0.718                     | 0.695         |
|                           | Median | 1.81                  | 1.94           | 2.13                  | 2.08                      | 2.05          |
|                           | Min.   | 1.0                   | 1.0            | 1.0                   | 1.0                       | 1.0           |
|                           | Max.   | 3.3                   | 3.2            | 3.8                   | 4.0                       | 4.0           |
| Run-in week 2 score       | n      | 21                    | 67             | 134                   | 131                       | 353           |
|                           | Mean   | 2.12                  | 2.08           | 2.21                  | 2.11                      | 2.14          |
|                           | SD     | 0.701                 | 0.603          | 0.763                 | 0.687                     | 0.702         |
|                           | Median | 2.20                  | 2.06           | 2.16                  | 2.18                      | 2.14          |
|                           | Min.   | 1.0                   | 1.0            | 1.0                   | 1.0                       | 1.0           |
|                           | Max.   | 3.1                   | 3.1            | 4.0                   | 3.8                       | 4.0           |

237

sam31676: /arenv/arprod/ccil8781\_gr33343/asq112989/final/drivers/sobda\_t042f.sas 12OCT2011 14:42

CONFIDENTIAL

ASQ112989

Protocol: ASQ112989  
Population: Run-in

Page 2 of 3

Table 3.02  
Summary of SOBDA Summary Scores

|                        | Run-in<br>failure<br>(N=52) | Placebo<br>(N=75) | SAL 50mcg<br>BID (N=152) | FSC<br>250/50mcg<br>BID (N=139) | Total<br>(N=418) |
|------------------------|-----------------------------|-------------------|--------------------------|---------------------------------|------------------|
| Treatment week 1 score | n                           | 67                | 139                      | 130                             | 336              |
|                        | Mean                        | 2.05              | 2.16                     | 1.95                            | 2.06             |
|                        | SD                          | 0.578             | 0.756                    | 0.697                           | 0.705            |
|                        | Median                      | 2.02              | 2.11                     | 1.85                            | 2.03             |
|                        | Min.                        | 1.0               | 1.0                      | 1.0                             | 1.0              |
|                        | Max.                        | 3.2               | 4.0                      | 3.8                             | 4.0              |
| Treatment week 2 score | n                           | 70                | 135                      | 129                             | 334              |
|                        | Mean                        | 2.02              | 2.11                     | 1.91                            | 2.01             |
|                        | SD                          | 0.651             | 0.765                    | 0.720                           | 0.729            |
|                        | Median                      | 2.04              | 2.07                     | 1.76                            | 1.95             |
|                        | Min.                        | 1.0               | 1.0                      | 1.0                             | 1.0              |
|                        | Max.                        | 3.7               | 4.0                      | 3.7                             | 4.0              |
| Treatment week 3 score | n                           | 68                | 136                      | 126                             | 330              |
|                        | Mean                        | 2.02              | 2.15                     | 1.90                            | 2.03             |
|                        | SD                          | 0.672             | 0.772                    | 0.718                           | 0.738            |
|                        | Median                      | 1.97              | 2.08                     | 1.83                            | 1.98             |
|                        | Min.                        | 1.1               | 1.0                      | 1.0                             | 1.0              |
|                        | Max.                        | 4.0               | 4.0                      | 3.7                             | 4.0              |
| Treatment week 4 score | n                           | 67                | 132                      | 125                             | 324              |
|                        | Mean                        | 2.01              | 2.11                     | 1.90                            | 2.01             |
|                        | SD                          | 0.674             | 0.772                    | 0.742                           | 0.745            |
|                        | Median                      | 1.97              | 1.99                     | 1.78                            | 1.95             |
|                        | Min.                        | 1.1               | 1.0                      | 1.0                             | 1.0              |
|                        | Max.                        | 3.5               | 4.0                      | 3.7                             | 4.0              |

sam31676: /arenv/arprod/ccil8781\_gr33343/asq112989/final/drivers/sobda\_t042f.sas 12OCT2011 14:42

CONFIDENTIAL

ASQ112989

Protocol: ASQ112989  
 Population: Run-in

Page 3 of 3

Table 3.02  
 Summary of SOBDA Summary Scores

|                        |        | Run-in failure<br>(N=52) | Placebo<br>(N=75) | SAL 50mcg<br>BID (N=152) | FSC<br>250/50mcg<br>BID (N=139) | Total<br>(N=418) |
|------------------------|--------|--------------------------|-------------------|--------------------------|---------------------------------|------------------|
| Treatment week 5 score | n      | 64                       | 126               | 119                      | 309                             |                  |
|                        | Mean   | 1.97                     | 2.16              | 1.89                     | 2.01                            |                  |
|                        | SD     | 0.633                    | 0.789             | 0.730                    | 0.744                           |                  |
|                        | Median | 1.96                     | 2.11              | 1.76                     | 1.97                            |                  |
|                        | Min.   | 1.0                      | 1.0               | 1.0                      | 1.0                             |                  |
|                        | Max.   | 3.5                      | 4.0               | 3.8                      | 4.0                             |                  |
| Treatment week 6 score | n      | 62                       | 113               | 107                      | 282                             |                  |
|                        | Mean   | 1.95                     | 2.15              | 1.96                     | 2.03                            |                  |
|                        | SD     | 0.667                    | 0.789             | 0.791                    | 0.768                           |                  |
|                        | Median | 1.97                     | 2.04              | 1.82                     | 1.95                            |                  |
|                        | Min.   | 1.0                      | 1.0               | 1.0                      | 1.0                             |                  |
|                        | Max.   | 3.5                      | 4.0               | 3.7                      | 4.0                             |                  |

239

sam31676: /arenv/arprod/ccil8781\_gr33343/asq112989/final/drivers/sobda\_t042f.sas 12OCT2011 14:42

Protocol: ASQ112989  
 Population: Modified Intent-to-treat

Page 1 of 2

Table 3.03  
 Summary of Change from Baseline in SOBDA Summary Scores

|                           |        | Placebo<br>(N=75) | SAL 50mcg<br>BID (N=151) | FSC<br>250/50mcg<br>BID (N=139) | Total<br>(N=365) |
|---------------------------|--------|-------------------|--------------------------|---------------------------------|------------------|
| -----                     |        |                   |                          |                                 |                  |
| Last treatment week score | n      | 63                | 121                      | 119                             | 303              |
|                           | Mean   | -0.07             | -0.08                    | -0.18                           | -0.12            |
|                           | SD     | 0.476             | 0.392                    | 0.496                           | 0.455            |
|                           | Median | -0.03             | -0.08                    | -0.15                           | -0.08            |
|                           | Min.   | -1.7              | -1.3                     | -1.7                            | -1.7             |
|                           | Max.   | 1.1               | 1.4                      | 1.1                             | 1.4              |
| Treatment week 1 score    | n      | 63                | 128                      | 126                             | 317              |
|                           | Mean   | -0.01             | -0.07                    | -0.16                           | -0.10            |
|                           | SD     | 0.277             | 0.284                    | 0.347                           | 0.314            |
|                           | Median | -0.00             | -0.01                    | -0.10                           | -0.04            |
|                           | Min.   | -1.0              | -1.1                     | -1.5                            | -1.5             |
|                           | Max.   | 0.9               | 0.9                      | 0.6                             | 0.9              |
| Treatment week 2 score    | n      | 65                | 125                      | 124                             | 314              |
|                           | Mean   | -0.02             | -0.10                    | -0.19                           | -0.12            |
|                           | SD     | 0.377             | 0.376                    | 0.408                           | 0.393            |
|                           | Median | 0.01              | -0.06                    | -0.11                           | -0.06            |
|                           | Min.   | -1.2              | -2.0                     | -1.9                            | -2.0             |
|                           | Max.   | 1.2               | 1.2                      | 0.8                             | 1.2              |
| Treatment week 3 score    | n      | 63                | 126                      | 121                             | 310              |
|                           | Mean   | -0.03             | -0.09                    | -0.21                           | -0.12            |
|                           | SD     | 0.464             | 0.359                    | 0.450                           | 0.423            |
|                           | Median | 0.00              | -0.06                    | -0.14                           | -0.07            |
|                           | Min.   | -1.6              | -1.4                     | -1.7                            | -1.7             |
|                           | Max.   | 1.6               | 1.4                      | 0.9                             | 1.6              |

sam31676: /arenv/arprod/ccil8781\_gr33343/asq112989/final/drivers/sobda\_t043f.sas 12OCT2011 14:54

CONFIDENTIAL

ASQ112989



Protocol: ASQ112989  
 Population: Modified Intent-to-treat

Page 2 of 2

Table 3.03  
 Summary of Change from Baseline in SOBDA Summary Scores

|                        |        | Placebo<br>(N=75) | SAL 50mcg<br>BID (N=151) | FSC<br>250/50mcg<br>BID (N=139) | Total<br>(N=365) |
|------------------------|--------|-------------------|--------------------------|---------------------------------|------------------|
| Treatment week 4 score | n      | 62                | 123                      | 120                             | 305              |
|                        | Mean   | -0.04             | -0.10                    | -0.21                           | -0.13            |
|                        | SD     | 0.449             | 0.364                    | 0.478                           | 0.433            |
|                        | Median | 0.00              | -0.05                    | -0.12                           | -0.05            |
|                        | Min.   | -1.6              | -1.0                     | -1.7                            | -1.7             |
|                        | Max.   | 0.8               | 1.4                      | 0.9                             | 1.4              |
| Treatment week 5 score | n      | 59                | 115                      | 114                             | 288              |
|                        | Mean   | -0.04             | -0.09                    | -0.22                           | -0.13            |
|                        | SD     | 0.439             | 0.410                    | 0.497                           | 0.457            |
|                        | Median | 0.00              | -0.07                    | -0.14                           | -0.07            |
|                        | Min.   | -1.4              | -1.2                     | -1.7                            | -1.7             |
|                        | Max.   | 0.9               | 1.4                      | 0.9                             | 1.4              |
| Treatment week 6 score | n      | 58                | 104                      | 103                             | 265              |
|                        | Mean   | -0.10             | -0.07                    | -0.18                           | -0.12            |
|                        | SD     | 0.464             | 0.409                    | 0.520                           | 0.468            |
|                        | Median | -0.02             | -0.04                    | -0.12                           | -0.04            |
|                        | Min.   | -1.8              | -1.3                     | -1.6                            | -1.8             |
|                        | Max.   | 0.9               | 1.4                      | 1.3                             | 1.4              |

241

sam31676: /arenv/arprod/ccil8781\_gr33343/asq112989/final/drivers/sobda\_t043f.sas 12OCT2011 14:54

CONFIDENTIAL

ASQ112989

Protocol: ASQ112989  
Population: Modified Intent-to-treat

Page 1 of 2

Table 3.04  
Summary of SOBDA Summary Score Response

| Week                |         | Placebo<br>(N=75) | SAL 50mcg BID<br>(N=151) | FSC 250/50mcg<br>BID<br>(N=139) | Total<br>(N=365) |
|---------------------|---------|-------------------|--------------------------|---------------------------------|------------------|
| Last treatment week | n       | 63                | 121                      | 119                             | 303              |
|                     | <= -0.1 | 23 (37%)          | 57 (47%)                 | 64 (54%)                        | 144 (48%)        |
|                     | > -0.1  | 40 (63%)          | 64 (53%)                 | 55 (46%)                        | 159 (52%)        |
|                     | <= -0.2 | 18 (29%)          | 41 (34%)                 | 57 (48%)                        | 116 (38%)        |
|                     | > -0.2  | 45 (71%)          | 80 (66%)                 | 62 (52%)                        | 187 (62%)        |
| Treatment week 1    | n       | 63                | 128                      | 126                             | 317              |
|                     | <= -0.1 | 20 (32%)          | 43 (34%)                 | 60 (48%)                        | 123 (39%)        |
|                     | > -0.1  | 43 (68%)          | 85 (66%)                 | 66 (52%)                        | 194 (61%)        |
|                     | <= -0.2 | 10 (16%)          | 33 (26%)                 | 46 (37%)                        | 89 (28%)         |
|                     | > -0.2  | 53 (84%)          | 95 (74%)                 | 80 (63%)                        | 228 (72%)        |
| Treatment week 2    | n       | 65                | 125                      | 124                             | 314              |
|                     | <= -0.1 | 21 (32%)          | 55 (44%)                 | 63 (51%)                        | 139 (44%)        |
|                     | > -0.1  | 44 (68%)          | 70 (56%)                 | 61 (49%)                        | 175 (56%)        |
|                     | <= -0.2 | 15 (23%)          | 36 (29%)                 | 46 (37%)                        | 97 (31%)         |
|                     | > -0.2  | 50 (77%)          | 89 (71%)                 | 78 (63%)                        | 217 (69%)        |
| Treatment week 3    | n       | 63                | 126                      | 121                             | 310              |
|                     | <= -0.1 | 21 (33%)          | 55 (44%)                 | 67 (55%)                        | 143 (46%)        |
|                     | > -0.1  | 42 (67%)          | 71 (56%)                 | 54 (45%)                        | 167 (54%)        |
|                     | <= -0.2 | 18 (29%)          | 39 (31%)                 | 52 (43%)                        | 109 (35%)        |
|                     | > -0.2  | 45 (71%)          | 87 (69%)                 | 69 (57%)                        | 201 (65%)        |

242

sam31676: /arenv/arprod/ccil8781\_gr33343/asq112989/final/drivers/sobda\_t044.sas 12OCT2011 14:56

CONFIDENTIAL

ASQ112989

Protocol: ASQ112989  
 Population: Modified Intent-to-treat

Page 2 of 2

Table 3.04  
 Summary of SOBDA Summary Score Response

| Week             |         | Placebo<br>(N=75) | SAL 50mcg BID<br>(N=151) | FSC 250/50mcg<br>BID<br>(N=139) | Total<br>(N=365) |
|------------------|---------|-------------------|--------------------------|---------------------------------|------------------|
| Treatment week 4 | n       | 62                | 123                      | 120                             | 305              |
|                  | <= -0.1 | 22 (35%)          | 53 (43%)                 | 63 (53%)                        | 138 (45%)        |
|                  | > -0.1  | 40 (65%)          | 70 (57%)                 | 57 (48%)                        | 167 (55%)        |
|                  | <= -0.2 | 18 (29%)          | 44 (36%)                 | 54 (45%)                        | 116 (38%)        |
|                  | > -0.2  | 44 (71%)          | 79 (64%)                 | 66 (55%)                        | 189 (62%)        |
| Treatment week 5 | n       | 59                | 115                      | 114                             | 288              |
|                  | <= -0.1 | 19 (32%)          | 52 (45%)                 | 61 (54%)                        | 132 (46%)        |
|                  | > -0.1  | 40 (68%)          | 63 (55%)                 | 53 (46%)                        | 156 (54%)        |
|                  | <= -0.2 | 15 (25%)          | 42 (37%)                 | 50 (44%)                        | 107 (37%)        |
|                  | > -0.2  | 44 (75%)          | 73 (63%)                 | 64 (56%)                        | 181 (63%)        |
| Treatment week 6 | n       | 58                | 104                      | 103                             | 265              |
|                  | <= -0.1 | 18 (31%)          | 44 (42%)                 | 55 (53%)                        | 117 (44%)        |
|                  | > -0.1  | 40 (69%)          | 60 (58%)                 | 48 (47%)                        | 148 (56%)        |
|                  | <= -0.2 | 16 (28%)          | 34 (33%)                 | 45 (44%)                        | 95 (36%)         |
|                  | > -0.2  | 42 (72%)          | 70 (67%)                 | 58 (56%)                        | 170 (64%)        |

243

sam31676: /arenv/arprod/ccil8781\_gr33343/asq112989/final/drivers/sobda\_t044.sas 12OCT2011 14:56

CONFIDENTIAL

ASQ112989

Protocol: ASQ112989  
Population: Modified Intent-to-treat

Table 3.05  
Analysis of Change from Baseline in SOBDA Last Treatment Week Score

|                                                   |                          | Placebo<br>(N=75) | SAL 50mcg BID<br>(N=151) | FSC 250/50mcg<br>BID (N=139) |
|---------------------------------------------------|--------------------------|-------------------|--------------------------|------------------------------|
| Change from baseline to SOBDA last treatment week | LS mean                  | -0.10             | -0.07                    | -0.19                        |
|                                                   | SE                       | 0.057             | 0.041                    | 0.041                        |
| Comparison with placebo                           | Responsiveness statistic |                   | -0.02                    | -0.24                        |
| Comparison with placebo [1]                       | Difference               |                   | 0.03                     | -0.09                        |
|                                                   | 95% CI                   |                   | (-0.11,0.16)             | (-0.23,0.05)                 |
|                                                   | p-value                  |                   | 0.702                    | 0.189                        |

244

[1] Analysis of covariance adjusted for age, gender and SOBDA baseline score.  
 The responsiveness statistic is defined as the difference between treatment groups divided by the standard deviation of the placebo group.  
 sam31676: /arenv/arprod/ccil8781\_gr33343/asq112989/final/drivers/sobda\_t045f.sas 12OCT2011 14:52

CONFIDENTIAL

ASQ112989

Protocol: ASQ112989  
 Population: Run-in

Page 1 of 3

Table 3.06  
 Summary of Mean Number of Puffs of Rescue per Day

|                     |        | Run-in failure (N=52) | Placebo (N=75) | SAL 50mcg BID (N=152) | FSC 250/50mcg BID (N=139) | Total (N=418) |
|---------------------|--------|-----------------------|----------------|-----------------------|---------------------------|---------------|
| Baseline            | n      | 26                    | 72             | 142                   | 132                       | 372           |
|                     | Mean   | 6.0                   | 4.3            | 4.8                   | 5.2                       | 4.9           |
|                     | SD     | 4.32                  | 3.27           | 4.15                  | 4.61                      | 4.19          |
|                     | Median | 6.0                   | 4.3            | 4.0                   | 4.3                       | 4.3           |
|                     | Min.   | 0                     | 0              | 0                     | 0                         | 0             |
|                     | Max.   | 17                    | 11             | 22                    | 27                        | 27            |
| Last treatment week | n      |                       | 70             | 138                   | 127                       | 335           |
|                     | Mean   |                       | 3.8            | 3.8                   | 3.5                       | 3.7           |
|                     | SD     |                       | 3.29           | 4.08                  | 4.08                      | 3.92          |
|                     | Median |                       | 3.0            | 2.8                   | 2.2                       | 2.5           |
|                     | Min.   |                       | 0              | 0                     | 0                         | 0             |
|                     | Max.   |                       | 11             | 21                    | 23                        | 23            |
| Run-in week 1       | n      | 34                    | 70             | 145                   | 126                       | 375           |
|                     | Mean   | 5.0                   | 4.2            | 4.3                   | 4.9                       | 4.6           |
|                     | SD     | 4.04                  | 3.29           | 3.76                  | 4.68                      | 4.04          |
|                     | Median | 4.1                   | 3.8            | 3.7                   | 4.0                       | 3.9           |
|                     | Min.   | 0                     | 0              | 0                     | 0                         | 0             |
|                     | Max.   | 15                    | 14             | 19                    | 36                        | 36            |
| Run-in week 2       | n      | 22                    | 71             | 142                   | 133                       | 368           |
|                     | Mean   | 6.1                   | 4.3            | 4.8                   | 5.1                       | 4.9           |
|                     | SD     | 3.96                  | 3.21           | 4.16                  | 4.35                      | 4.06          |
|                     | Median | 6.0                   | 4.3            | 4.0                   | 4.3                       | 4.2           |
|                     | Min.   | 0                     | 0              | 0                     | 0                         | 0             |
|                     | Max.   | 17                    | 11             | 23                    | 20                        | 23            |

Note: 1 nebuLe has been considered equivalent to 2 puffs.  
 sam31676: /arenv/arprod/ccil8781\_gr33343/asq112989/final/drivers/resc\_t001.sas 29JUL2010 10:38

Protocol: ASQ112989  
Population: Run-in

Page 2 of 3

Table 3.06  
Summary of Mean Number of Puffs of Rescue per Day

|                  | Run-in<br>failure<br>(N=52) | Placebo<br>(N=75) | SAL 50mcg<br>BID (N=152) | FSC<br>250/50mcg<br>BID (N=139) | Total<br>(N=418) |
|------------------|-----------------------------|-------------------|--------------------------|---------------------------------|------------------|
| Treatment week 1 | n                           | 71                | 145                      | 135                             | 351              |
|                  | Mean                        | 4.4               | 4.3                      | 4.1                             | 4.3              |
|                  | SD                          | 3.84              | 4.20                     | 4.04                            | 4.06             |
|                  | Median                      | 4.0               | 3.7                      | 3.0                             | 3.5              |
|                  | Min.                        | 0                 | 0                        | 0                               | 0                |
|                  | Max.                        | 18                | 23                       | 19                              | 23               |
| Treatment week 2 | n                           | 72                | 141                      | 132                             | 345              |
|                  | Mean                        | 4.4               | 4.2                      | 3.6                             | 4.0              |
|                  | SD                          | 4.11              | 4.44                     | 3.54                            | 4.05             |
|                  | Median                      | 3.9               | 3.4                      | 2.6                             | 3.3              |
|                  | Min.                        | 0                 | 0                        | 0                               | 0                |
|                  | Max.                        | 20                | 24                       | 18                              | 24               |
| Treatment week 3 | n                           | 70                | 140                      | 130                             | 340              |
|                  | Mean                        | 4.2               | 4.1                      | 3.6                             | 3.9              |
|                  | SD                          | 3.83              | 4.03                     | 3.53                            | 3.81             |
|                  | Median                      | 3.4               | 3.7                      | 2.8                             | 3.2              |
|                  | Min.                        | 0                 | 0                        | 0                               | 0                |
|                  | Max.                        | 18                | 20                       | 15                              | 20               |
| Treatment week 4 | n                           | 69                | 139                      | 129                             | 337              |
|                  | Mean                        | 3.9               | 4.1                      | 3.8                             | 3.9              |
|                  | SD                          | 3.51              | 3.96                     | 3.81                            | 3.81             |
|                  | Median                      | 2.6               | 3.8                      | 2.7                             | 3.0              |
|                  | Min.                        | 0                 | 0                        | 0                               | 0                |
|                  | Max.                        | 13                | 20                       | 21                              | 21               |

Note: 1 nebuler has been considered equivalent to 2 puffs.

sam31676: /arenv/arprod/ccil8781\_gr33343/asq112989/final/drivers/resc\_t001.sas 29JUL2010 10:38

CONFIDENTIAL

ASQ112989

Protocol: ASQ112989  
Population: Run-in

Page 3 of 3

Table 3.06  
Summary of Mean Number of Puffs of Rescue per Day

|                  | Run-in failure (N=52) | Placebo (N=75) | SAL 50mcg BID (N=152) | FSC 250/50mcg BID (N=139) | Total (N=418) |
|------------------|-----------------------|----------------|-----------------------|---------------------------|---------------|
| Treatment week 5 | n                     | 67             | 133                   | 125                       | 325           |
|                  | Mean                  | 4.1            | 4.0                   | 3.7                       | 3.9           |
|                  | SD                    | 3.56           | 4.23                  | 3.66                      | 3.88          |
|                  | Median                | 3.0            | 3.7                   | 3.0                       | 3.1           |
|                  | Min.                  | 0              | 0                     | 0                         | 0             |
|                  | Max.                  | 12             | 21                    | 17                        | 21            |
| Treatment week 6 | n                     | 64             | 124                   | 111                       | 299           |
|                  | Mean                  | 4.0            | 3.9                   | 3.5                       | 3.8           |
|                  | SD                    | 3.28           | 4.25                  | 4.24                      | 4.05          |
|                  | Median                | 3.3            | 2.9                   | 2.0                       | 2.6           |
|                  | Min.                  | 0              | 0                     | 0                         | 0             |
|                  | Max.                  | 11             | 21                    | 24                        | 24            |

Note: 1 nebuler has been considered equivalent to 2 puffs.  
sam31676: /arenv/arprod/ccil8781\_gr33343/asq112989/final/drivers/resc\_t001.sas 29JUL2010 10:38

247

Protocol: ASQ112989  
 Population: Modified Intent-to-treat

Page 1 of 2

Table 3.07  
 Summary of Change from Baseline in Mean Number of Puffs of Rescue per Day

|                     |        | Placebo<br>(N=75) | SAL 50mcg<br>BID (N=151) | FSC<br>250/50mcg<br>BID (N=139) | Total<br>(N=365) |
|---------------------|--------|-------------------|--------------------------|---------------------------------|------------------|
| Last treatment week | n      | 68                | 131                      | 123                             | 322              |
|                     | Mean   | -0.4              | -0.8                     | -1.3                            | -0.9             |
|                     | SD     | 2.52              | 2.88                     | 3.26                            | 2.97             |
|                     | Median | 0.0               | -0.6                     | -0.6                            | -0.5             |
|                     | Min.   | -9                | -12                      | -15                             | -15              |
|                     | Max.   | 5                 | 9                        | 10                              | 10               |
| Treatment week 1    | n      | 69                | 137                      | 131                             | 337              |
|                     | Mean   | -0.0              | -0.5                     | -1.1                            | -0.6             |
|                     | SD     | 2.46              | 2.23                     | 2.64                            | 2.47             |
|                     | Median | 0.0               | -0.3                     | -0.3                            | -0.3             |
|                     | Min.   | -7                | -13                      | -11                             | -13              |
|                     | Max.   | 10                | 7                        | 7                               | 10               |
| Treatment week 2    | n      | 70                | 134                      | 127                             | 331              |
|                     | Mean   | 0.1               | -0.4                     | -1.4                            | -0.7             |
|                     | SD     | 3.04              | 3.28                     | 3.13                            | 3.22             |
|                     | Median | -0.1              | -0.3                     | -0.4                            | -0.3             |
|                     | Min.   | -9                | -13                      | -15                             | -15              |
|                     | Max.   | 12                | 22                       | 4                               | 22               |
| Treatment week 3    | n      | 67                | 132                      | 125                             | 324              |
|                     | Mean   | -0.1              | -0.6                     | -1.6                            | -0.9             |
|                     | SD     | 2.89              | 2.88                     | 3.42                            | 3.15             |
|                     | Median | -0.3              | -0.5                     | -0.4                            | -0.4             |
|                     | Min.   | -10               | -12                      | -20                             | -20              |
|                     | Max.   | 10                | 14                       | 4                               | 14               |

Note: 1 nebuLe has been considered equivalent to 2 puffs.

sam31676: /arenv/arprod/ccil8781\_gr33343/asq112989/final/drivers/resc\_t002.sas 29JUL2010 10:38

CONFIDENTIAL

ASQ112989



Protocol: ASQ112989  
 Population: Modified Intent-to-treat

Page 2 of 2

Table 3.07  
 Summary of Change from Baseline in Mean Number of Puffs of Rescue per Day

|                  |        | Placebo<br>(N=75) | SAL 50mcg<br>BID (N=151) | FSC<br>250/50mcg<br>BID (N=139) | Total<br>(N=365) |
|------------------|--------|-------------------|--------------------------|---------------------------------|------------------|
| Treatment week 4 | n      | 67                | 132                      | 124                             | 323              |
|                  | Mean   | -0.3              | -0.7                     | -1.4                            | -0.9             |
|                  | SD     | 2.63              | 2.82                     | 3.37                            | 3.03             |
|                  | Median | 0.0               | -0.4                     | -0.4                            | -0.3             |
|                  | Min.   | -9                | -11                      | -16                             | -16              |
|                  | Max.   | 6                 | 13                       | 5                               | 13               |
| Treatment week 5 | n      | 65                | 124                      | 120                             | 309              |
|                  | Mean   | -0.3              | -0.6                     | -1.4                            | -0.8             |
|                  | SD     | 2.47              | 2.85                     | 3.11                            | 2.91             |
|                  | Median | 0.0               | -0.3                     | -0.4                            | -0.3             |
|                  | Min.   | -9                | -11                      | -15                             | -15              |
|                  | Max.   | 4                 | 11                       | 6                               | 11               |
| Treatment week 6 | n      | 62                | 116                      | 107                             | 285              |
|                  | Mean   | -0.3              | -0.8                     | -1.4                            | -0.9             |
|                  | SD     | 2.47              | 3.11                     | 3.39                            | 3.11             |
|                  | Median | 0.0               | -0.6                     | -0.7                            | -0.4             |
|                  | Min.   | -9                | -12                      | -16                             | -16              |
|                  | Max.   | 6                 | 9                        | 10                              | 10               |

Note: 1 nebuler has been considered equivalent to 2 puffs.  
 sam31676: /arenv/arprod/ccil8781\_gr33343/asq112989/final/drivers/resc\_t002.sas 29JUL2010 10:38

249

For peer review only

Protocol: ASQ112989  
Population: Run-in

Page 1 of 3

Table 3.08  
Summary of Percentage of Rescue-Free Days

| Visit               |        | Run-in<br>failure<br>(N=52) | Placebo<br>(N=75) | SAL 50mcg<br>BID (N=152) | FSC<br>250/50mcg<br>BID (N=139) | Total<br>(N=418) |
|---------------------|--------|-----------------------------|-------------------|--------------------------|---------------------------------|------------------|
| Baseline            | n      | 26                          | 72                | 142                      | 132                             | 372              |
|                     | Mean   | 10.4                        | 22.7              | 21.5                     | 22.1                            | 21.2             |
|                     | SD     | 25.34                       | 39.24             | 37.17                    | 39.30                           | 37.65            |
|                     | Median | 0.0                         | 0.0               | 0.0                      | 0.0                             | 0.0              |
|                     | Min.   | 0                           | 0                 | 0                        | 0                               | 0                |
|                     | Max.   | 100                         | 100               | 100                      | 100                             | 100              |
| Last treatment week | n      |                             | 70                | 138                      | 127                             | 335              |
|                     | Mean   |                             | 23.7              | 29.8                     | 35.2                            | 30.6             |
|                     | SD     |                             | 38.78             | 42.73                    | 44.32                           | 42.65            |
|                     | Median |                             | 0.0               | 0.0                      | 0.0                             | 0.0              |
|                     | Min.   |                             | 0                 | 0                        | 0                               | 0                |
|                     | Max.   |                             | 100               | 100                      | 100                             | 100              |
| Run-in week 1       | n      | 34                          | 70                | 145                      | 126                             | 375              |
|                     | Mean   | 21.9                        | 20.4              | 23.8                     | 23.4                            | 22.9             |
|                     | SD     | 31.56                       | 35.60             | 35.84                    | 36.53                           | 35.55            |
|                     | Median | 0.0                         | 0.0               | 0.0                      | 0.0                             | 0.0              |
|                     | Min.   | 0                           | 0                 | 0                        | 0                               | 0                |
|                     | Max.   | 100                         | 100               | 100                      | 100                             | 100              |
| Run-in week 2       | n      | 22                          | 71                | 142                      | 133                             | 368              |
|                     | Mean   | 8.4                         | 22.4              | 21.8                     | 22.9                            | 21.5             |
|                     | SD     | 21.89                       | 38.91             | 37.01                    | 39.42                           | 37.58            |
|                     | Median | 0.0                         | 0.0               | 0.0                      | 0.0                             | 0.0              |
|                     | Min.   | 0                           | 0                 | 0                        | 0                               | 0                |
|                     | Max.   | 100                         | 100               | 100                      | 100                             | 100              |

dln73797: /arenv/arprod/ccil8781\_gr33343/asq112989/final/drivers/resc\_t003.sas 27JUL2010 20:29

Protocol: ASQ112989  
Population: Run-in

Page 2 of 3

Table 3.08  
Summary of Percentage of Rescue-Free Days

| Visit            |        | Run-in failure (N=52) | Placebo (N=75) | SAL 50mcg BID (N=152) | FSC 250/50mcg BID (N=139) | Total (N=418) |
|------------------|--------|-----------------------|----------------|-----------------------|---------------------------|---------------|
| Treatment week 1 | n      | 71                    | 145            | 135                   | 351                       |               |
|                  | Mean   | 23.3                  | 24.1           | 29.9                  | 26.2                      |               |
|                  | SD     | 37.80                 | 38.26          | 41.85                 | 39.59                     |               |
|                  | Median | 0.0                   | 0.0            | 0.0                   | 0.0                       |               |
|                  | Min.   | 0                     | 0              | 0                     | 0                         |               |
|                  | Max.   | 100                   | 100            | 100                   | 100                       |               |
| Treatment week 2 | n      | 72                    | 141            | 132                   | 345                       |               |
|                  | Mean   | 23.9                  | 26.0           | 31.6                  | 27.7                      |               |
|                  | SD     | 39.11                 | 40.00          | 42.37                 | 40.75                     |               |
|                  | Median | 0.0                   | 0.0            | 0.0                   | 0.0                       |               |
|                  | Min.   | 0                     | 0              | 0                     | 0                         |               |
|                  | Max.   | 100                   | 100            | 100                   | 100                       |               |
| Treatment week 3 | n      | 70                    | 140            | 130                   | 340                       |               |
|                  | Mean   | 22.3                  | 26.6           | 32.4                  | 27.9                      |               |
|                  | SD     | 38.20                 | 41.44          | 43.08                 | 41.50                     |               |
|                  | Median | 0.0                   | 0.0            | 0.0                   | 0.0                       |               |
|                  | Min.   | 0                     | 0              | 0                     | 0                         |               |
|                  | Max.   | 100                   | 100            | 100                   | 100                       |               |
| Treatment week 4 | n      | 69                    | 139            | 129                   | 337                       |               |
|                  | Mean   | 24.3                  | 27.0           | 31.3                  | 28.1                      |               |
|                  | SD     | 39.33                 | 41.25          | 42.54                 | 41.34                     |               |
|                  | Median | 0.0                   | 0.0            | 0.0                   | 0.0                       |               |
|                  | Min.   | 0                     | 0              | 0                     | 0                         |               |
|                  | Max.   | 100                   | 100            | 100                   | 100                       |               |

251

dln73797: /arenv/arprod/ccil8781\_gr33343/asq112989/final/drivers/resc\_t003.sas 27JUL2010 20:29

CONFIDENTIAL

ASQ112989

Protocol: ASQ112989  
Population: Run-in

Page 3 of 3

Table 3.08  
Summary of Percentage of Rescue-Free Days

| Visit            |        | Run-in<br>failure<br>(N=52) | Placebo<br>(N=75) | SAL 50mcg<br>BID (N=152) | FSC<br>250/50mcg<br>BID (N=139) | Total<br>(N=418) |
|------------------|--------|-----------------------------|-------------------|--------------------------|---------------------------------|------------------|
| Treatment week 5 | n      | 67                          | 133               | 125                      | 325                             |                  |
|                  | Mean   | 23.8                        | 28.6              | 32.5                     | 29.1                            |                  |
|                  | SD     | 39.83                       | 41.57             | 43.36                    | 41.92                           |                  |
|                  | Median | 0.0                         | 0.0               | 0.0                      | 0.0                             |                  |
|                  | Min.   | 0                           | 0                 | 0                        | 0                               |                  |
|                  | Max.   | 100                         | 100               | 100                      | 100                             |                  |
| Treatment week 6 | n      | 64                          | 124               | 111                      | 299                             |                  |
|                  | Mean   | 22.4                        | 31.0              | 36.2                     | 31.1                            |                  |
|                  | SD     | 37.90                       | 43.83             | 45.07                    | 43.27                           |                  |
|                  | Median | 0.0                         | 0.0               | 0.0                      | 0.0                             |                  |
|                  | Min.   | 0                           | 0                 | 0                        | 0                               |                  |
|                  | Max.   | 100                         | 100               | 100                      | 100                             |                  |

252

dln73797: /arenv/arprod/ccil8781\_gr33343/asq112989/final/drivers/resc\_t003.sas 27JUL2010 20:29

Protocol: ASQ112989  
 Population: Modified Intent-to-treat

Page 1 of 2

Table 3.09  
 Summary of Change from Baseline in Percentage of Rescue-Free Days

| Visit               |        | Placebo<br>(N=75) | SAL 50mcg<br>BID (N=151) | FSC<br>250/50mcg<br>BID (N=139) | Total<br>(N=365) |
|---------------------|--------|-------------------|--------------------------|---------------------------------|------------------|
| Last treatment week | n      | 68                | 131                      | 123                             | 322              |
|                     | Mean   | 1.4               | 6.6                      | 10.7                            | 7.1              |
|                     | SD     | 33.80             | 32.54                    | 39.65                           | 35.74            |
|                     | Median | 0.0               | 0.0                      | 0.0                             | 0.0              |
|                     | Min.   | -100              | -100                     | -100                            | -100             |
|                     | Max.   | 100               | 100                      | 100                             | 100              |
| Treatment week 1    | n      | 69                | 137                      | 131                             | 337              |
|                     | Mean   | 1.7               | 2.2                      | 7.4                             | 4.1              |
|                     | SD     | 27.97             | 23.99                    | 30.46                           | 27.51            |
|                     | Median | 0.0               | 0.0                      | 0.0                             | 0.0              |
|                     | Min.   | -100              | -100                     | -100                            | -100             |
|                     | Max.   | 60                | 86                       | 100                             | 100              |
| Treatment week 2    | n      | 70                | 134                      | 127                             | 331              |
|                     | Mean   | 2.3               | 3.3                      | 8.0                             | 4.9              |
|                     | SD     | 34.37             | 28.03                    | 34.64                           | 32.06            |
|                     | Median | 0.0               | 0.0                      | 0.0                             | 0.0              |
|                     | Min.   | -100              | -100                     | -100                            | -100             |
|                     | Max.   | 100               | 100                      | 100                             | 100              |
| Treatment week 3    | n      | 67                | 132                      | 125                             | 324              |
|                     | Mean   | -0.2              | 3.8                      | 9.3                             | 5.1              |
|                     | SD     | 34.02             | 29.24                    | 35.95                           | 33.06            |
|                     | Median | 0.0               | 0.0                      | 0.0                             | 0.0              |
|                     | Min.   | -100              | -100                     | -100                            | -100             |
|                     | Max.   | 100               | 100                      | 100                             | 100              |

253

dln73797: /arenv/arprod/ccil8781\_gr33343/asq112989/final/drivers/resc\_t004.sas 27JUL2010 20:13

CONFIDENTIAL

ASQ112989

Protocol: ASQ112989  
Population: Modified Intent-to-treat

Table 3.09  
Summary of Change from Baseline in Percentage of Rescue-Free Days

| Visit            |        | Placebo<br>(N=75) | SAL 50mcg<br>BID (N=151) | FSC<br>250/50mcg<br>BID (N=139) | Total<br>(N=365) |
|------------------|--------|-------------------|--------------------------|---------------------------------|------------------|
| Treatment week 4 | n      | 67                | 132                      | 124                             | 323              |
|                  | Mean   | 1.3               | 4.6                      | 8.7                             | 5.5              |
|                  | SD     | 35.01             | 31.83                    | 37.92                           | 34.94            |
|                  | Median | 0.0               | 0.0                      | 0.0                             | 0.0              |
|                  | Min.   | -100              | -100                     | -100                            | -100             |
|                  | Max.   | 100               | 100                      | 100                             | 100              |
| Treatment week 5 | n      | 65                | 124                      | 120                             | 309              |
|                  | Mean   | 0.4               | 4.6                      | 9.9                             | 5.8              |
|                  | SD     | 35.56             | 32.12                    | 39.63                           | 35.99            |
|                  | Median | 0.0               | 0.0                      | 0.0                             | 0.0              |
|                  | Min.   | -100              | -100                     | -100                            | -100             |
|                  | Max.   | 100               | 100                      | 100                             | 100              |
| Treatment week 6 | n      | 62                | 116                      | 107                             | 285              |
|                  | Mean   | -0.1              | 6.8                      | 11.7                            | 7.1              |
|                  | SD     | 35.05             | 34.72                    | 39.59                           | 36.83            |
|                  | Median | 0.0               | 0.0                      | 0.0                             | 0.0              |
|                  | Min.   | -100              | -100                     | -100                            | -100             |
|                  | Max.   | 100               | 100                      | 100                             | 100              |

254

dln73797: /arenv/arprod/ccil8781\_gr33343/asq112989/final/drivers/resc\_t004.sas 27JUL2010 20:13

CONFIDENTIAL

ASQ112989

Protocol: ASQ112989  
Population: Run-in

Page 1 of 14

Table 3.10  
Summary of Global Assessment of Shortness of Breath

| Day          | Response       | Run-in failure (N=52) | Placebo (N=75) | SAL 50mcg BID (N=152) | FSC 250/50mcg BID (N=139) | Total (N=418) |
|--------------|----------------|-----------------------|----------------|-----------------------|---------------------------|---------------|
| Run-in day 1 | n              | 37                    | 61             | 127                   | 119                       | 344           |
|              | 1 (Not at all) | 3 (8%)                | 2 (3%)         | 7 (6%)                | 1 (<1%)                   | 13 (4%)       |
|              | 2 (Slightly)   | 14 (38%)              | 31 (51%)       | 45 (35%)              | 62 (52%)                  | 152 (44%)     |
|              | 3 (Moderately) | 18 (49%)              | 25 (41%)       | 66 (52%)              | 49 (41%)                  | 158 (46%)     |
|              | 4 (Severely)   | 1 (3%)                | 3 (5%)         | 8 (6%)                | 4 (3%)                    | 16 (5%)       |
|              | 5 (Extremely)  | 1 (3%)                | 0              | 1 (<1%)               | 3 (3%)                    | 5 (1%)        |
| Run-in day 2 | n              | 36                    | 62             | 128                   | 112                       | 338           |
|              | 1 (Not at all) | 3 (8%)                | 1 (2%)         | 3 (2%)                | 1 (<1%)                   | 8 (2%)        |
|              | 2 (Slightly)   | 21 (58%)              | 23 (37%)       | 48 (38%)              | 51 (46%)                  | 143 (42%)     |
|              | 3 (Moderately) | 10 (28%)              | 36 (58%)       | 59 (46%)              | 47 (42%)                  | 152 (45%)     |
|              | 4 (Severely)   | 2 (6%)                | 2 (3%)         | 13 (10%)              | 11 (10%)                  | 28 (8%)       |
|              | 5 (Extremely)  | 0                     | 0              | 5 (4%)                | 2 (2%)                    | 7 (2%)        |
| Run-in day 3 | n              | 34                    | 61             | 140                   | 113                       | 348           |
|              | 1 (Not at all) | 3 (9%)                | 2 (3%)         | 7 (5%)                | 5 (4%)                    | 17 (5%)       |
|              | 2 (Slightly)   | 19 (56%)              | 25 (41%)       | 51 (36%)              | 50 (44%)                  | 145 (42%)     |
|              | 3 (Moderately) | 10 (29%)              | 31 (51%)       | 64 (46%)              | 43 (38%)                  | 148 (43%)     |
|              | 4 (Severely)   | 2 (6%)                | 2 (3%)         | 14 (10%)              | 13 (12%)                  | 31 (9%)       |
|              | 5 (Extremely)  | 0                     | 1 (2%)         | 4 (3%)                | 2 (2%)                    | 7 (2%)        |
| Run-in day 4 | n              | 32                    | 67             | 136                   | 116                       | 351           |
|              | 1 (Not at all) | 2 (6%)                | 1 (1%)         | 5 (4%)                | 5 (4%)                    | 13 (4%)       |
|              | 2 (Slightly)   | 16 (50%)              | 37 (55%)       | 53 (39%)              | 58 (50%)                  | 164 (47%)     |
|              | 3 (Moderately) | 9 (28%)               | 25 (37%)       | 61 (45%)              | 39 (34%)                  | 134 (38%)     |
|              | 4 (Severely)   | 4 (13%)               | 3 (4%)         | 16 (12%)              | 13 (11%)                  | 36 (10%)      |
|              | 5 (Extremely)  | 1 (3%)                | 1 (1%)         | 1 (<1%)               | 1 (<1%)                   | 4 (1%)        |

255

dln73797: /arenv/arprod/ccil8781\_gr33343/asq112989/final/drivers/glass\_t001.sas 27JUL2010 20:10

Protocol: ASQ112989  
Population: Run-in

Page 2 of 14

Table 3.10  
Summary of Global Assessment of Shortness of Breath

| Day          | Response       | Run-in failure<br>(N=52) | Placebo<br>(N=75) | SAL 50mcg<br>BID<br>(N=152) | FSC<br>250/50mcg<br>BID<br>(N=139) | Total<br>(N=418) |
|--------------|----------------|--------------------------|-------------------|-----------------------------|------------------------------------|------------------|
| Run-in day 5 | n              | 32                       | 66                | 135                         | 119                                | 352              |
|              | 1 (Not at all) | 3 (9%)                   | 1 (2%)            | 4 (3%)                      | 5 (4%)                             | 13 (4%)          |
|              | 2 (Slightly)   | 16 (50%)                 | 33 (50%)          | 49 (36%)                    | 49 (41%)                           | 147 (42%)        |
|              | 3 (Moderately) | 10 (31%)                 | 30 (45%)          | 67 (50%)                    | 47 (39%)                           | 154 (44%)        |
|              | 4 (Severely)   | 3 (9%)                   | 2 (3%)            | 13 (10%)                    | 15 (13%)                           | 33 (9%)          |
|              | 5 (Extremely)  | 0                        | 0                 | 2 (1%)                      | 3 (3%)                             | 5 (1%)           |
| Run-in day 6 | n              | 28                       | 65                | 140                         | 123                                | 356              |
|              | 1 (Not at all) | 1 (4%)                   | 3 (5%)            | 3 (2%)                      | 2 (2%)                             | 9 (3%)           |
|              | 2 (Slightly)   | 14 (50%)                 | 31 (48%)          | 62 (44%)                    | 63 (51%)                           | 170 (48%)        |
|              | 3 (Moderately) | 8 (29%)                  | 29 (45%)          | 56 (40%)                    | 47 (38%)                           | 140 (39%)        |
|              | 4 (Severely)   | 4 (14%)                  | 2 (3%)            | 16 (11%)                    | 10 (8%)                            | 32 (9%)          |
|              | 5 (Extremely)  | 1 (4%)                   | 0                 | 3 (2%)                      | 1 (<1%)                            | 5 (1%)           |
| Run-in day 7 | n              | 27                       | 67                | 143                         | 124                                | 361              |
|              | 1 (Not at all) | 1 (4%)                   | 3 (4%)            | 8 (6%)                      | 5 (4%)                             | 17 (5%)          |
|              | 2 (Slightly)   | 13 (48%)                 | 28 (42%)          | 49 (34%)                    | 53 (43%)                           | 143 (40%)        |
|              | 3 (Moderately) | 10 (37%)                 | 35 (52%)          | 68 (48%)                    | 52 (42%)                           | 165 (46%)        |
|              | 4 (Severely)   | 1 (4%)                   | 1 (1%)            | 17 (12%)                    | 11 (9%)                            | 30 (8%)          |
|              | 5 (Extremely)  | 2 (7%)                   | 0                 | 1 (<1%)                     | 3 (2%)                             | 6 (2%)           |
| Run-in day 8 | n              | 26                       | 68                | 139                         | 125                                | 358              |
|              | 1 (Not at all) | 2 (8%)                   | 5 (7%)            | 8 (6%)                      | 3 (2%)                             | 18 (5%)          |
|              | 2 (Slightly)   | 11 (42%)                 | 27 (40%)          | 44 (32%)                    | 56 (45%)                           | 138 (39%)        |
|              | 3 (Moderately) | 8 (31%)                  | 28 (41%)          | 71 (51%)                    | 54 (43%)                           | 161 (45%)        |
|              | 4 (Severely)   | 5 (19%)                  | 6 (9%)            | 14 (10%)                    | 10 (8%)                            | 35 (10%)         |
|              | 5 (Extremely)  | 0                        | 2 (3%)            | 2 (1%)                      | 2 (2%)                             | 6 (2%)           |

dln73797: /arenv/arprod/ccil8781\_gr33343/asq112989/final/drivers/glass\_t001.sas 27JUL2010 20:10



Protocol: ASQ112989  
Population: Run-in

Page 3 of 14

Table 3.10  
Summary of Global Assessment of Shortness of Breath

| Day           | Response       | Run-in failure (N=52) | Placebo (N=75) | SAL 50mcg BID (N=152) | FSC 250/50mcg BID (N=139) | Total (N=418) |
|---------------|----------------|-----------------------|----------------|-----------------------|---------------------------|---------------|
| Run-in day 9  | n              | 25                    | 65             | 136                   | 127                       | 353           |
|               | 1 (Not at all) | 0                     | 3 (5%)         | 7 (5%)                | 5 (4%)                    | 15 (4%)       |
|               | 2 (Slightly)   | 11 (44%)              | 31 (48%)       | 49 (36%)              | 55 (43%)                  | 146 (41%)     |
|               | 3 (Moderately) | 12 (48%)              | 29 (45%)       | 64 (47%)              | 51 (40%)                  | 156 (44%)     |
|               | 4 (Severely)   | 1 (4%)                | 2 (3%)         | 15 (11%)              | 15 (12%)                  | 33 (9%)       |
|               | 5 (Extremely)  | 1 (4%)                | 0              | 1 (<1%)               | 1 (<1%)                   | 3 (<1%)       |
| Run-in day 10 | n              | 22                    | 64             | 139                   | 125                       | 350           |
|               | 1 (Not at all) | 3 (14%)               | 2 (3%)         | 4 (3%)                | 4 (3%)                    | 13 (4%)       |
|               | 2 (Slightly)   | 4 (18%)               | 32 (50%)       | 54 (39%)              | 58 (46%)                  | 148 (42%)     |
|               | 3 (Moderately) | 13 (59%)              | 28 (44%)       | 68 (49%)              | 45 (36%)                  | 154 (44%)     |
|               | 4 (Severely)   | 2 (9%)                | 2 (3%)         | 12 (9%)               | 17 (14%)                  | 33 (9%)       |
|               | 5 (Extremely)  | 0                     | 0              | 1 (<1%)               | 1 (<1%)                   | 2 (<1%)       |
| Run-in day 11 | n              | 22                    | 67             | 138                   | 122                       | 349           |
|               | 1 (Not at all) | 1 (5%)                | 4 (6%)         | 4 (3%)                | 7 (6%)                    | 16 (5%)       |
|               | 2 (Slightly)   | 7 (32%)               | 30 (45%)       | 55 (40%)              | 51 (42%)                  | 143 (41%)     |
|               | 3 (Moderately) | 13 (59%)              | 28 (42%)       | 65 (47%)              | 52 (43%)                  | 158 (45%)     |
|               | 4 (Severely)   | 1 (5%)                | 5 (7%)         | 13 (9%)               | 10 (8%)                   | 29 (8%)       |
|               | 5 (Extremely)  | 0                     | 0              | 1 (<1%)               | 2 (2%)                    | 3 (<1%)       |
| Run-in day 12 | n              | 25                    | 71             | 133                   | 122                       | 351           |
|               | 1 (Not at all) | 0                     | 5 (7%)         | 4 (3%)                | 4 (3%)                    | 13 (4%)       |
|               | 2 (Slightly)   | 14 (56%)              | 29 (41%)       | 49 (37%)              | 58 (48%)                  | 150 (43%)     |
|               | 3 (Moderately) | 10 (40%)              | 35 (49%)       | 64 (48%)              | 48 (39%)                  | 157 (45%)     |
|               | 4 (Severely)   | 1 (4%)                | 2 (3%)         | 14 (11%)              | 11 (9%)                   | 28 (8%)       |
|               | 5 (Extremely)  | 0                     | 0              | 2 (2%)                | 1 (<1%)                   | 3 (<1%)       |

257

dln73797: /arenv/arprod/ccil8781\_gr33343/asq112989/final/drivers/glass\_t001.sas 27JUL2010 20:10

Protocol: ASQ112989  
Population: Run-in

Page 4 of 14

Table 3.10  
Summary of Global Assessment of Shortness of Breath

| Day           | Response       | Run-in failure<br>(N=52) | Placebo<br>(N=75) | SAL 50mcg<br>BID<br>(N=152) | FSC<br>250/50mcg<br>BID<br>(N=139) | Total<br>(N=418) |
|---------------|----------------|--------------------------|-------------------|-----------------------------|------------------------------------|------------------|
| Run-in day 13 | n              | 22                       | 62                | 128                         | 112                                | 324              |
|               | 1 (Not at all) | 0                        | 1 (2%)            | 6 (5%)                      | 3 (3%)                             | 10 (3%)          |
|               | 2 (Slightly)   | 10 (45%)                 | 36 (58%)          | 44 (34%)                    | 43 (38%)                           | 133 (41%)        |
|               | 3 (Moderately) | 10 (45%)                 | 21 (34%)          | 59 (46%)                    | 52 (46%)                           | 142 (44%)        |
|               | 4 (Severely)   | 2 (9%)                   | 4 (6%)            | 17 (13%)                    | 12 (11%)                           | 35 (11%)         |
|               | 5 (Extremely)  | 0                        | 0                 | 2 (2%)                      | 2 (2%)                             | 4 (1%)           |
| Run-in day 14 | n              | 17                       | 59                | 115                         | 108                                | 299              |
|               | 1 (Not at all) | 1 (6%)                   | 3 (5%)            | 3 (3%)                      | 2 (2%)                             | 9 (3%)           |
|               | 2 (Slightly)   | 5 (29%)                  | 26 (44%)          | 39 (34%)                    | 46 (43%)                           | 116 (39%)        |
|               | 3 (Moderately) | 8 (47%)                  | 27 (46%)          | 62 (54%)                    | 50 (46%)                           | 147 (49%)        |
|               | 4 (Severely)   | 2 (12%)                  | 3 (5%)            | 9 (8%)                      | 8 (7%)                             | 22 (7%)          |
|               | 5 (Extremely)  | 1 (6%)                   | 0                 | 2 (2%)                      | 2 (2%)                             | 5 (2%)           |
| Study day 1   | n              | 4                        | 70                | 143                         | 133                                | 350              |
|               | 1 (Not at all) | 1 (25%)                  | 3 (4%)            | 4 (3%)                      | 3 (2%)                             | 11 (3%)          |
|               | 2 (Slightly)   | 1 (25%)                  | 33 (47%)          | 62 (43%)                    | 60 (45%)                           | 156 (45%)        |
|               | 3 (Moderately) | 0                        | 32 (46%)          | 60 (42%)                    | 56 (42%)                           | 148 (42%)        |
|               | 4 (Severely)   | 2 (50%)                  | 2 (3%)            | 13 (9%)                     | 13 (10%)                           | 30 (9%)          |
|               | 5 (Extremely)  | 0                        | 0                 | 4 (3%)                      | 1 (<1%)                            | 5 (1%)           |
| Study day 2   | n              | 1                        | 71                | 136                         | 129                                | 337              |
|               | 1 (Not at all) | 0                        | 4 (6%)            | 6 (4%)                      | 8 (6%)                             | 18 (5%)          |
|               | 2 (Slightly)   | 0                        | 29 (41%)          | 57 (42%)                    | 65 (50%)                           | 151 (45%)        |
|               | 3 (Moderately) | 0                        | 37 (52%)          | 63 (46%)                    | 48 (37%)                           | 148 (44%)        |
|               | 4 (Severely)   | 1 (100%)                 | 1 (1%)            | 8 (6%)                      | 8 (6%)                             | 18 (5%)          |
|               | 5 (Extremely)  | 0                        | 0                 | 2 (1%)                      | 0                                  | 2 (<1%)          |

258

dln73797: /arenv/arprod/ccil8781\_gr33343/asq112989/final/drivers/glass\_t001.sas 27JUL2010 20:10

Protocol: ASQ112989  
Population: Run-in

Page 5 of 14

Table 3.10  
Summary of Global Assessment of Shortness of Breath

| Day         | Response       | Run-in failure (N=52) | Placebo (N=75) | SAL 50mcg BID (N=152) | FSC 250/50mcg BID (N=139) | Total (N=418) |
|-------------|----------------|-----------------------|----------------|-----------------------|---------------------------|---------------|
| Study day 3 | n              | 1                     | 68             | 134                   | 127                       | 330           |
|             | 1 (Not at all) | 0                     | 2 (3%)         | 6 (4%)                | 8 (6%)                    | 16 (5%)       |
|             | 2 (Slightly)   | 1 (100%)              | 28 (41%)       | 65 (49%)              | 70 (55%)                  | 164 (50%)     |
|             | 3 (Moderately) | 0                     | 36 (53%)       | 54 (40%)              | 43 (34%)                  | 133 (40%)     |
|             | 4 (Severely)   | 0                     | 2 (3%)         | 8 (6%)                | 6 (5%)                    | 16 (5%)       |
|             | 5 (Extremely)  | 0                     | 0              | 1 (<1%)               | 0                         | 1 (<1%)       |
| Study day 4 | n              | 1                     | 71             | 139                   | 132                       | 343           |
|             | 1 (Not at all) | 0                     | 2 (3%)         | 6 (4%)                | 9 (7%)                    | 17 (5%)       |
|             | 2 (Slightly)   | 1 (100%)              | 34 (48%)       | 57 (41%)              | 74 (56%)                  | 166 (48%)     |
|             | 3 (Moderately) | 0                     | 33 (46%)       | 61 (44%)              | 44 (33%)                  | 138 (40%)     |
|             | 4 (Severely)   | 0                     | 2 (3%)         | 13 (9%)               | 4 (3%)                    | 19 (6%)       |
|             | 5 (Extremely)  | 0                     | 0              | 2 (1%)                | 1 (<1%)                   | 3 (<1%)       |
| Study day 5 | n              | 0                     | 68             | 141                   | 131                       | 340           |
|             | 1 (Not at all) | 0                     | 3 (4%)         | 7 (5%)                | 9 (7%)                    | 19 (6%)       |
|             | 2 (Slightly)   | 0                     | 24 (35%)       | 54 (38%)              | 67 (51%)                  | 145 (43%)     |
|             | 3 (Moderately) | 0                     | 37 (54%)       | 68 (48%)              | 43 (33%)                  | 148 (44%)     |
|             | 4 (Severely)   | 0                     | 4 (6%)         | 11 (8%)               | 11 (8%)                   | 26 (8%)       |
|             | 5 (Extremely)  | 0                     | 0              | 1 (<1%)               | 1 (<1%)                   | 2 (<1%)       |
| Study day 6 | n              | 0                     | 68             | 138                   | 129                       | 335           |
|             | 1 (Not at all) | 0                     | 5 (7%)         | 5 (4%)                | 9 (7%)                    | 19 (6%)       |
|             | 2 (Slightly)   | 0                     | 24 (35%)       | 68 (49%)              | 70 (54%)                  | 162 (48%)     |
|             | 3 (Moderately) | 0                     | 37 (54%)       | 52 (38%)              | 42 (33%)                  | 131 (39%)     |
|             | 4 (Severely)   | 0                     | 2 (3%)         | 11 (8%)               | 8 (6%)                    | 21 (6%)       |
|             | 5 (Extremely)  | 0                     | 0              | 2 (1%)                | 0                         | 2 (<1%)       |

259

dln73797: /arenv/arprod/ccil8781\_gr33343/asq112989/final/drivers/glass\_t001.sas 27JUL2010 20:10

Protocol: ASQ112989  
Population: Run-in

Page 6 of 14

Table 3.10  
Summary of Global Assessment of Shortness of Breath

| Day          | Response       | Run-in failure<br>(N=52) | Placebo<br>(N=75) | SAL 50mcg<br>BID<br>(N=152) | FSC<br>250/50mcg<br>BID<br>(N=139) | Total<br>(N=418) |
|--------------|----------------|--------------------------|-------------------|-----------------------------|------------------------------------|------------------|
| Study day 7  | n              | 0                        | 67                | 141                         | 124                                | 332              |
|              | 1 (Not at all) | 0                        | 4 (6%)            | 4 (3%)                      | 7 (6%)                             | 15 (5%)          |
|              | 2 (Slightly)   | 0                        | 28 (42%)          | 65 (46%)                    | 64 (52%)                           | 157 (47%)        |
|              | 3 (Moderately) | 0                        | 33 (49%)          | 60 (43%)                    | 41 (33%)                           | 134 (40%)        |
|              | 4 (Severely)   | 0                        | 2 (3%)            | 11 (8%)                     | 12 (10%)                           | 25 (8%)          |
|              | 5 (Extremely)  | 0                        | 0                 | 1 (<1%)                     | 0                                  | 1 (<1%)          |
| Study day 8  | n              | 0                        | 71                | 139                         | 127                                | 337              |
|              | 1 (Not at all) | 0                        | 4 (6%)            | 5 (4%)                      | 12 (9%)                            | 21 (6%)          |
|              | 2 (Slightly)   | 0                        | 29 (41%)          | 64 (46%)                    | 69 (54%)                           | 162 (48%)        |
|              | 3 (Moderately) | 0                        | 35 (49%)          | 60 (43%)                    | 39 (31%)                           | 134 (40%)        |
|              | 4 (Severely)   | 0                        | 3 (4%)            | 10 (7%)                     | 7 (6%)                             | 20 (6%)          |
|              | 5 (Extremely)  | 0                        | 0                 | 0                           | 0                                  | 0                |
| Study day 9  | n              | 0                        | 67                | 135                         | 132                                | 334              |
|              | 1 (Not at all) | 0                        | 4 (6%)            | 7 (5%)                      | 12 (9%)                            | 23 (7%)          |
|              | 2 (Slightly)   | 0                        | 30 (45%)          | 60 (44%)                    | 69 (52%)                           | 159 (48%)        |
|              | 3 (Moderately) | 0                        | 29 (43%)          | 56 (41%)                    | 42 (32%)                           | 127 (38%)        |
|              | 4 (Severely)   | 0                        | 4 (6%)            | 11 (8%)                     | 8 (6%)                             | 23 (7%)          |
|              | 5 (Extremely)  | 0                        | 0                 | 1 (<1%)                     | 1 (<1%)                            | 2 (<1%)          |
| Study day 10 | n              | 0                        | 69                | 138                         | 130                                | 337              |
|              | 1 (Not at all) | 0                        | 3 (4%)            | 10 (7%)                     | 14 (11%)                           | 27 (8%)          |
|              | 2 (Slightly)   | 0                        | 30 (43%)          | 58 (42%)                    | 69 (53%)                           | 157 (47%)        |
|              | 3 (Moderately) | 0                        | 35 (51%)          | 57 (41%)                    | 42 (32%)                           | 134 (40%)        |
|              | 4 (Severely)   | 0                        | 1 (1%)            | 12 (9%)                     | 4 (3%)                             | 17 (5%)          |
|              | 5 (Extremely)  | 0                        | 0                 | 1 (<1%)                     | 1 (<1%)                            | 2 (<1%)          |

dln73797: /arenv/arprod/ccil8781\_gr33343/asq112989/final/drivers/glass\_t001.sas 27JUL2010 20:10

Protocol: ASQ112989  
Population: Run-in

Page 7 of 14

Table 3.10  
Summary of Global Assessment of Shortness of Breath

| Day          | Response       | Run-in failure (N=52) | Placebo (N=75) | SAL 50mcg BID (N=152) | FSC 250/50mcg BID (N=139) | Total (N=418) |
|--------------|----------------|-----------------------|----------------|-----------------------|---------------------------|---------------|
| Study day 11 | n              | 0                     | 69             | 136                   | 126                       | 331           |
|              | 1 (Not at all) | 0                     | 4 (6%)         | 7 (5%)                | 12 (10%)                  | 23 (7%)       |
|              | 2 (Slightly)   | 0                     | 33 (48%)       | 68 (50%)              | 71 (56%)                  | 172 (52%)     |
|              | 3 (Moderately) | 0                     | 32 (46%)       | 48 (35%)              | 35 (28%)                  | 115 (35%)     |
|              | 4 (Severely)   | 0                     | 0              | 11 (8%)               | 7 (6%)                    | 18 (5%)       |
|              | 5 (Extremely)  | 0                     | 0              | 2 (1%)                | 1 (<1%)                   | 3 (<1%)       |
| Study day 12 | n              | 0                     | 67             | 138                   | 123                       | 328           |
|              | 1 (Not at all) | 0                     | 5 (7%)         | 8 (6%)                | 10 (8%)                   | 23 (7%)       |
|              | 2 (Slightly)   | 0                     | 26 (39%)       | 70 (51%)              | 64 (52%)                  | 160 (49%)     |
|              | 3 (Moderately) | 0                     | 35 (52%)       | 47 (34%)              | 38 (31%)                  | 120 (37%)     |
|              | 4 (Severely)   | 0                     | 1 (1%)         | 10 (7%)               | 10 (8%)                   | 21 (6%)       |
|              | 5 (Extremely)  | 0                     | 0              | 3 (2%)                | 1 (<1%)                   | 4 (1%)        |
| Study day 13 | n              | 0                     | 69             | 139                   | 129                       | 337           |
|              | 1 (Not at all) | 0                     | 3 (4%)         | 7 (5%)                | 12 (9%)                   | 22 (7%)       |
|              | 2 (Slightly)   | 0                     | 37 (54%)       | 69 (50%)              | 63 (49%)                  | 169 (50%)     |
|              | 3 (Moderately) | 0                     | 26 (38%)       | 46 (33%)              | 45 (35%)                  | 117 (35%)     |
|              | 4 (Severely)   | 0                     | 2 (3%)         | 15 (11%)              | 9 (7%)                    | 26 (8%)       |
|              | 5 (Extremely)  | 0                     | 1 (1%)         | 2 (1%)                | 0                         | 3 (<1%)       |
| Study day 14 | n              | 0                     | 67             | 137                   | 126                       | 330           |
|              | 1 (Not at all) | 0                     | 6 (9%)         | 11 (8%)               | 11 (9%)                   | 28 (8%)       |
|              | 2 (Slightly)   | 0                     | 32 (48%)       | 69 (50%)              | 74 (59%)                  | 175 (53%)     |
|              | 3 (Moderately) | 0                     | 27 (40%)       | 42 (31%)              | 35 (28%)                  | 104 (32%)     |
|              | 4 (Severely)   | 0                     | 2 (3%)         | 15 (11%)              | 5 (4%)                    | 22 (7%)       |
|              | 5 (Extremely)  | 0                     | 0              | 0                     | 1 (<1%)                   | 1 (<1%)       |

261

dln73797: /arenv/arprod/ccil8781\_gr33343/asq112989/final/drivers/glass\_t001.sas 27JUL2010 20:10

CONFIDENTIAL

ASQ112989

Protocol: ASQ112989  
Population: Run-in

Page 8 of 14

Table 3.10  
Summary of Global Assessment of Shortness of Breath

| Day          | Response       | Run-in failure<br>(N=52) | Placebo<br>(N=75) | SAL 50mcg<br>BID<br>(N=152) | FSC<br>250/50mcg<br>BID<br>(N=139) | Total<br>(N=418) |
|--------------|----------------|--------------------------|-------------------|-----------------------------|------------------------------------|------------------|
| Study day 15 | n              | 0                        | 69                | 136                         | 125                                | 330              |
|              | 1 (Not at all) | 0                        | 5 (7%)            | 9 (7%)                      | 11 (9%)                            | 25 (8%)          |
|              | 2 (Slightly)   | 0                        | 35 (51%)          | 61 (45%)                    | 60 (48%)                           | 156 (47%)        |
|              | 3 (Moderately) | 0                        | 28 (41%)          | 51 (38%)                    | 49 (39%)                           | 128 (39%)        |
|              | 4 (Severely)   | 0                        | 0                 | 15 (11%)                    | 5 (4%)                             | 20 (6%)          |
|              | 5 (Extremely)  | 0                        | 1 (1%)            | 0                           | 0                                  | 1 (<1%)          |
| Study day 16 | n              | 0                        | 66                | 138                         | 124                                | 328              |
|              | 1 (Not at all) | 0                        | 7 (11%)           | 9 (7%)                      | 14 (11%)                           | 30 (9%)          |
|              | 2 (Slightly)   | 0                        | 35 (53%)          | 60 (43%)                    | 65 (52%)                           | 160 (49%)        |
|              | 3 (Moderately) | 0                        | 23 (35%)          | 60 (43%)                    | 38 (31%)                           | 121 (37%)        |
|              | 4 (Severely)   | 0                        | 1 (2%)            | 9 (7%)                      | 6 (5%)                             | 16 (5%)          |
|              | 5 (Extremely)  | 0                        | 0                 | 0                           | 1 (<1%)                            | 1 (<1%)          |
| Study day 17 | n              | 0                        | 66                | 133                         | 122                                | 321              |
|              | 1 (Not at all) | 0                        | 3 (5%)            | 9 (7%)                      | 9 (7%)                             | 21 (7%)          |
|              | 2 (Slightly)   | 0                        | 32 (48%)          | 57 (43%)                    | 68 (56%)                           | 157 (49%)        |
|              | 3 (Moderately) | 0                        | 28 (42%)          | 57 (43%)                    | 36 (30%)                           | 121 (38%)        |
|              | 4 (Severely)   | 0                        | 2 (3%)            | 8 (6%)                      | 9 (7%)                             | 19 (6%)          |
|              | 5 (Extremely)  | 0                        | 1 (2%)            | 2 (2%)                      | 0                                  | 3 (<1%)          |
| Study day 18 | n              | 0                        | 66                | 136                         | 126                                | 328              |
|              | 1 (Not at all) | 0                        | 7 (11%)           | 8 (6%)                      | 12 (10%)                           | 27 (8%)          |
|              | 2 (Slightly)   | 0                        | 29 (44%)          | 59 (43%)                    | 59 (47%)                           | 147 (45%)        |
|              | 3 (Moderately) | 0                        | 27 (41%)          | 60 (44%)                    | 49 (39%)                           | 136 (41%)        |
|              | 4 (Severely)   | 0                        | 3 (5%)            | 8 (6%)                      | 6 (5%)                             | 17 (5%)          |
|              | 5 (Extremely)  | 0                        | 0                 | 1 (<1%)                     | 0                                  | 1 (<1%)          |

262

dln73797: /arenv/arprod/ccil8781\_gr33343/asq112989/final/drivers/glass\_t001.sas 27JUL2010 20:10

Protocol: ASQ112989  
Population: Run-in

Page 9 of 14

Table 3.10  
Summary of Global Assessment of Shortness of Breath

| Day          | Response       | Run-in failure (N=52) | Placebo (N=75) | SAL 50mcg BID (N=152) | FSC 250/50mcg BID (N=139) | Total (N=418) |
|--------------|----------------|-----------------------|----------------|-----------------------|---------------------------|---------------|
| Study day 19 | n              | 0                     | 67             | 135                   | 124                       | 326           |
|              | 1 (Not at all) | 0                     | 7 (10%)        | 6 (4%)                | 14 (11%)                  | 27 (8%)       |
|              | 2 (Slightly)   | 0                     | 30 (45%)       | 60 (44%)              | 66 (53%)                  | 156 (48%)     |
|              | 3 (Moderately) | 0                     | 27 (40%)       | 59 (44%)              | 36 (29%)                  | 122 (37%)     |
|              | 4 (Severely)   | 0                     | 3 (4%)         | 8 (6%)                | 7 (6%)                    | 18 (6%)       |
|              | 5 (Extremely)  | 0                     | 0              | 2 (1%)                | 1 (<1%)                   | 3 (<1%)       |
| Study day 20 | n              | 0                     | 68             | 136                   | 121                       | 325           |
|              | 1 (Not at all) | 0                     | 7 (10%)        | 10 (7%)               | 14 (12%)                  | 31 (10%)      |
|              | 2 (Slightly)   | 0                     | 26 (38%)       | 57 (42%)              | 61 (50%)                  | 144 (44%)     |
|              | 3 (Moderately) | 0                     | 33 (49%)       | 58 (43%)              | 38 (31%)                  | 129 (40%)     |
|              | 4 (Severely)   | 0                     | 1 (1%)         | 10 (7%)               | 8 (7%)                    | 19 (6%)       |
|              | 5 (Extremely)  | 0                     | 1 (1%)         | 1 (<1%)               | 0                         | 2 (<1%)       |
| Study day 21 | n              | 0                     | 67             | 133                   | 126                       | 326           |
|              | 1 (Not at all) | 0                     | 6 (9%)         | 6 (5%)                | 12 (10%)                  | 24 (7%)       |
|              | 2 (Slightly)   | 0                     | 29 (43%)       | 60 (45%)              | 69 (55%)                  | 158 (48%)     |
|              | 3 (Moderately) | 0                     | 29 (43%)       | 53 (40%)              | 39 (31%)                  | 121 (37%)     |
|              | 4 (Severely)   | 0                     | 3 (4%)         | 13 (10%)              | 6 (5%)                    | 22 (7%)       |
|              | 5 (Extremely)  | 0                     | 0              | 1 (<1%)               | 0                         | 1 (<1%)       |
| Study day 22 | n              | 0                     | 68             | 134                   | 127                       | 329           |
|              | 1 (Not at all) | 0                     | 6 (9%)         | 6 (4%)                | 11 (9%)                   | 23 (7%)       |
|              | 2 (Slightly)   | 0                     | 31 (46%)       | 60 (45%)              | 66 (52%)                  | 157 (48%)     |
|              | 3 (Moderately) | 0                     | 28 (41%)       | 53 (40%)              | 42 (33%)                  | 123 (37%)     |
|              | 4 (Severely)   | 0                     | 3 (4%)         | 14 (10%)              | 8 (6%)                    | 25 (8%)       |
|              | 5 (Extremely)  | 0                     | 0              | 1 (<1%)               | 0                         | 1 (<1%)       |

263

CONFIDENTIAL

ASQ112989

dln73797: /arenv/arprod/ccil8781\_gr33343/asq112989/final/drivers/glass\_t001.sas 27JUL2010 20:10

Protocol: ASQ112989  
Population: Run-in

Page 10 of 14

Table 3.10  
Summary of Global Assessment of Shortness of Breath

| Day          | Response       | Run-in failure (N=52) | Placebo (N=75) | SAL 50mcg BID (N=152) | FSC 250/50mcg BID (N=139) | Total (N=418) |
|--------------|----------------|-----------------------|----------------|-----------------------|---------------------------|---------------|
| Study day 23 | n              | 0                     | 70             | 132                   | 123                       | 325           |
|              | 1 (Not at all) | 0                     | 7 (10%)        | 9 (7%)                | 15 (12%)                  | 31 (10%)      |
|              | 2 (Slightly)   | 0                     | 29 (41%)       | 57 (43%)              | 59 (48%)                  | 145 (45%)     |
|              | 3 (Moderately) | 0                     | 31 (44%)       | 53 (40%)              | 40 (33%)                  | 124 (38%)     |
|              | 4 (Severely)   | 0                     | 3 (4%)         | 12 (9%)               | 9 (7%)                    | 24 (7%)       |
|              | 5 (Extremely)  | 0                     | 0              | 1 (<1%)               | 0                         | 1 (<1%)       |
| Study day 24 | n              | 0                     | 66             | 131                   | 124                       | 321           |
|              | 1 (Not at all) | 0                     | 6 (9%)         | 7 (5%)                | 12 (10%)                  | 25 (8%)       |
|              | 2 (Slightly)   | 0                     | 27 (41%)       | 64 (49%)              | 64 (52%)                  | 155 (48%)     |
|              | 3 (Moderately) | 0                     | 29 (44%)       | 46 (35%)              | 37 (30%)                  | 112 (35%)     |
|              | 4 (Severely)   | 0                     | 2 (3%)         | 12 (9%)               | 9 (7%)                    | 23 (7%)       |
|              | 5 (Extremely)  | 0                     | 2 (3%)         | 2 (2%)                | 2 (2%)                    | 6 (2%)        |
| Study day 25 | n              | 0                     | 66             | 132                   | 124                       | 322           |
|              | 1 (Not at all) | 0                     | 4 (6%)         | 7 (5%)                | 18 (15%)                  | 29 (9%)       |
|              | 2 (Slightly)   | 0                     | 32 (48%)       | 62 (47%)              | 62 (50%)                  | 156 (48%)     |
|              | 3 (Moderately) | 0                     | 28 (42%)       | 48 (36%)              | 36 (29%)                  | 112 (35%)     |
|              | 4 (Severely)   | 0                     | 2 (3%)         | 13 (10%)              | 6 (5%)                    | 21 (7%)       |
|              | 5 (Extremely)  | 0                     | 0              | 2 (2%)                | 2 (2%)                    | 4 (1%)        |
| Study day 26 | n              | 0                     | 63             | 134                   | 123                       | 320           |
|              | 1 (Not at all) | 0                     | 6 (10%)        | 7 (5%)                | 20 (16%)                  | 33 (10%)      |
|              | 2 (Slightly)   | 0                     | 24 (38%)       | 62 (46%)              | 66 (54%)                  | 152 (48%)     |
|              | 3 (Moderately) | 0                     | 30 (48%)       | 50 (37%)              | 27 (22%)                  | 107 (33%)     |
|              | 4 (Severely)   | 0                     | 3 (5%)         | 14 (10%)              | 8 (7%)                    | 25 (8%)       |
|              | 5 (Extremely)  | 0                     | 0              | 1 (<1%)               | 2 (2%)                    | 3 (<1%)       |

dln73797: /arenv/arprod/ccil8781\_gr33343/asq112989/final/drivers/glass\_t001.sas 27JUL2010 20:10



Protocol: ASQ112989  
Population: Run-in

Page 11 of 14

Table 3.10  
Summary of Global Assessment of Shortness of Breath

| Day           | Response       | Run-in failure (N=52) | Placebo (N=75) | SAL 50mcg BID (N=152) | FSC 250/50mcg BID (N=139) | Total (N=418) |
|---------------|----------------|-----------------------|----------------|-----------------------|---------------------------|---------------|
| Study day 27  | n              | 0                     | 64             | 132                   | 119                       | 315           |
|               | 1 (Not at all) | 0                     | 5 (8%)         | 8 (6%)                | 12 (10%)                  | 25 (8%)       |
|               | 2 (Slightly)   | 0                     | 29 (45%)       | 57 (43%)              | 64 (54%)                  | 150 (48%)     |
|               | 3 (Moderately) | 0                     | 30 (47%)       | 55 (42%)              | 35 (29%)                  | 120 (38%)     |
|               | 4 (Severely)   | 0                     | 0              | 10 (8%)               | 8 (7%)                    | 18 (6%)       |
| 5 (Extremely) | 0              | 0                     | 2 (2%)         | 0                     | 2 (<1%)                   |               |
| Study day 28  | n              | 0                     | 65             | 135                   | 123                       | 323           |
|               | 1 (Not at all) | 0                     | 4 (6%)         | 8 (6%)                | 8 (7%)                    | 20 (6%)       |
|               | 2 (Slightly)   | 0                     | 36 (55%)       | 66 (49%)              | 68 (55%)                  | 170 (53%)     |
|               | 3 (Moderately) | 0                     | 23 (35%)       | 48 (36%)              | 33 (27%)                  | 104 (32%)     |
|               | 4 (Severely)   | 0                     | 2 (3%)         | 12 (9%)               | 13 (11%)                  | 27 (8%)       |
| 5 (Extremely) | 0              | 0                     | 1 (<1%)        | 1 (<1%)               | 2 (<1%)                   |               |
| Study day 29  | n              | 0                     | 64             | 133                   | 119                       | 316           |
|               | 1 (Not at all) | 0                     | 5 (8%)         | 9 (7%)                | 9 (8%)                    | 23 (7%)       |
|               | 2 (Slightly)   | 0                     | 32 (50%)       | 61 (46%)              | 65 (55%)                  | 158 (50%)     |
|               | 3 (Moderately) | 0                     | 27 (42%)       | 52 (39%)              | 36 (30%)                  | 115 (36%)     |
|               | 4 (Severely)   | 0                     | 0              | 10 (8%)               | 8 (7%)                    | 18 (6%)       |
| 5 (Extremely) | 0              | 0                     | 1 (<1%)        | 1 (<1%)               | 2 (<1%)                   |               |
| Study day 30  | n              | 0                     | 62             | 127                   | 122                       | 311           |
|               | 1 (Not at all) | 0                     | 5 (8%)         | 8 (6%)                | 13 (11%)                  | 26 (8%)       |
|               | 2 (Slightly)   | 0                     | 29 (47%)       | 59 (46%)              | 64 (52%)                  | 152 (49%)     |
|               | 3 (Moderately) | 0                     | 28 (45%)       | 48 (38%)              | 34 (28%)                  | 110 (35%)     |
|               | 4 (Severely)   | 0                     | 0              | 10 (8%)               | 10 (8%)                   | 20 (6%)       |
| 5 (Extremely) | 0              | 0                     | 2 (2%)         | 1 (<1%)               | 3 (<1%)                   |               |

265

dln73797: /arenv/arprod/ccil8781\_gr33343/asq112989/final/drivers/glass\_t001.sas 27JUL2010 20:10

CONFIDENTIAL

ASQ112989

Protocol: ASQ112989  
Population: Run-in

Page 12 of 14

Table 3.10  
Summary of Global Assessment of Shortness of Breath

| Day          | Response       | Run-in failure<br>(N=52) | Placebo<br>(N=75) | SAL 50mcg<br>BID<br>(N=152) | FSC<br>250/50mcg<br>BID<br>(N=139) | Total<br>(N=418) |
|--------------|----------------|--------------------------|-------------------|-----------------------------|------------------------------------|------------------|
| Study day 31 | n              | 0                        | 63                | 129                         | 121                                | 313              |
|              | 1 (Not at all) | 0                        | 7 (11%)           | 9 (7%)                      | 14 (12%)                           | 30 (10%)         |
|              | 2 (Slightly)   | 0                        | 29 (46%)          | 60 (47%)                    | 67 (55%)                           | 156 (50%)        |
|              | 3 (Moderately) | 0                        | 24 (38%)          | 44 (34%)                    | 32 (26%)                           | 100 (32%)        |
|              | 4 (Severely)   | 0                        | 3 (5%)            | 15 (12%)                    | 7 (6%)                             | 25 (8%)          |
|              | 5 (Extremely)  | 0                        | 0                 | 1 (<1%)                     | 1 (<1%)                            | 2 (<1%)          |
| Study day 32 | n              | 0                        | 63                | 126                         | 119                                | 308              |
|              | 1 (Not at all) | 0                        | 6 (10%)           | 10 (8%)                     | 13 (11%)                           | 29 (9%)          |
|              | 2 (Slightly)   | 0                        | 28 (44%)          | 51 (40%)                    | 61 (51%)                           | 140 (45%)        |
|              | 3 (Moderately) | 0                        | 27 (43%)          | 52 (41%)                    | 34 (29%)                           | 113 (37%)        |
|              | 4 (Severely)   | 0                        | 2 (3%)            | 13 (10%)                    | 9 (8%)                             | 24 (8%)          |
|              | 5 (Extremely)  | 0                        | 0                 | 0                           | 2 (2%)                             | 2 (<1%)          |
| Study day 33 | n              | 0                        | 66                | 130                         | 123                                | 319              |
|              | 1 (Not at all) | 0                        | 6 (9%)            | 6 (5%)                      | 14 (11%)                           | 26 (8%)          |
|              | 2 (Slightly)   | 0                        | 30 (45%)          | 66 (51%)                    | 65 (53%)                           | 161 (50%)        |
|              | 3 (Moderately) | 0                        | 29 (44%)          | 47 (36%)                    | 39 (32%)                           | 115 (36%)        |
|              | 4 (Severely)   | 0                        | 1 (2%)            | 9 (7%)                      | 3 (2%)                             | 13 (4%)          |
|              | 5 (Extremely)  | 0                        | 0                 | 2 (2%)                      | 2 (2%)                             | 4 (1%)           |
| Study day 34 | n              | 0                        | 67                | 130                         | 118                                | 315              |
|              | 1 (Not at all) | 0                        | 6 (9%)            | 9 (7%)                      | 13 (11%)                           | 28 (9%)          |
|              | 2 (Slightly)   | 0                        | 29 (43%)          | 61 (47%)                    | 68 (58%)                           | 158 (50%)        |
|              | 3 (Moderately) | 0                        | 30 (45%)          | 47 (36%)                    | 31 (26%)                           | 108 (34%)        |
|              | 4 (Severely)   | 0                        | 2 (3%)            | 12 (9%)                     | 5 (4%)                             | 19 (6%)          |
|              | 5 (Extremely)  | 0                        | 0                 | 1 (<1%)                     | 1 (<1%)                            | 2 (<1%)          |

dln73797: /arenv/arprod/ccil8781\_gr33343/asq112989/final/drivers/glass\_t001.sas 27JUL2010 20:10

Protocol: ASQ112989  
Population: Run-in

Page 13 of 14

Table 3.10  
Summary of Global Assessment of Shortness of Breath

| Day          | Response       | Run-in failure (N=52) | Placebo (N=75) | SAL 50mcg BID (N=152) | FSC 250/50mcg BID (N=139) | Total (N=418) |
|--------------|----------------|-----------------------|----------------|-----------------------|---------------------------|---------------|
| Study day 35 | n              | 0                     | 68             | 129                   | 118                       | 315           |
|              | 1 (Not at all) | 0                     | 3 (4%)         | 10 (8%)               | 13 (11%)                  | 26 (8%)       |
|              | 2 (Slightly)   | 0                     | 27 (40%)       | 62 (48%)              | 63 (53%)                  | 152 (48%)     |
|              | 3 (Moderately) | 0                     | 37 (54%)       | 42 (33%)              | 35 (30%)                  | 114 (36%)     |
|              | 4 (Severely)   | 0                     | 1 (1%)         | 13 (10%)              | 5 (4%)                    | 19 (6%)       |
|              | 5 (Extremely)  | 0                     | 0              | 2 (2%)                | 2 (2%)                    | 4 (1%)        |
| Study day 36 | n              | 0                     | 64             | 129                   | 116                       | 309           |
|              | 1 (Not at all) | 0                     | 3 (5%)         | 8 (6%)                | 18 (16%)                  | 29 (9%)       |
|              | 2 (Slightly)   | 0                     | 34 (53%)       | 63 (49%)              | 56 (48%)                  | 153 (50%)     |
|              | 3 (Moderately) | 0                     | 25 (39%)       | 46 (36%)              | 35 (30%)                  | 106 (34%)     |
|              | 4 (Severely)   | 0                     | 2 (3%)         | 10 (8%)               | 5 (4%)                    | 17 (6%)       |
|              | 5 (Extremely)  | 0                     | 0              | 2 (2%)                | 2 (2%)                    | 4 (1%)        |
| Study day 37 | n              | 0                     | 65             | 128                   | 114                       | 307           |
|              | 1 (Not at all) | 0                     | 5 (8%)         | 9 (7%)                | 12 (11%)                  | 26 (8%)       |
|              | 2 (Slightly)   | 0                     | 29 (45%)       | 59 (46%)              | 59 (52%)                  | 147 (48%)     |
|              | 3 (Moderately) | 0                     | 29 (45%)       | 49 (38%)              | 33 (29%)                  | 111 (36%)     |
|              | 4 (Severely)   | 0                     | 2 (3%)         | 10 (8%)               | 9 (8%)                    | 21 (7%)       |
|              | 5 (Extremely)  | 0                     | 0              | 1 (<1%)               | 1 (<1%)                   | 2 (<1%)       |
| Study day 38 | n              | 0                     | 64             | 127                   | 111                       | 302           |
|              | 1 (Not at all) | 0                     | 4 (6%)         | 8 (6%)                | 12 (11%)                  | 24 (8%)       |
|              | 2 (Slightly)   | 0                     | 34 (53%)       | 60 (47%)              | 54 (49%)                  | 148 (49%)     |
|              | 3 (Moderately) | 0                     | 24 (38%)       | 51 (40%)              | 36 (32%)                  | 111 (37%)     |
|              | 4 (Severely)   | 0                     | 2 (3%)         | 6 (5%)                | 7 (6%)                    | 15 (5%)       |
|              | 5 (Extremely)  | 0                     | 0              | 2 (2%)                | 2 (2%)                    | 4 (1%)        |

267

dln73797: /arenv/arprod/ccil8781\_gr33343/asq112989/final/drivers/glass\_t001.sas 27JUL2010 20:10

Protocol: ASQ112989  
Population: Run-in

Page 14 of 14

Table 3.10  
Summary of Global Assessment of Shortness of Breath

| Day          | Response       | Run-in failure<br>(N=52) | Placebo<br>(N=75) | SAL 50mcg<br>BID<br>(N=152) | FSC<br>250/50mcg<br>BID<br>(N=139) | Total<br>(N=418) |
|--------------|----------------|--------------------------|-------------------|-----------------------------|------------------------------------|------------------|
| Study day 39 | n              | 0                        | 61                | 129                         | 113                                | 303              |
|              | 1 (Not at all) | 0                        | 5 (8%)            | 11 (9%)                     | 15 (13%)                           | 31 (10%)         |
|              | 2 (Slightly)   | 0                        | 29 (48%)          | 59 (46%)                    | 57 (50%)                           | 145 (48%)        |
|              | 3 (Moderately) | 0                        | 25 (41%)          | 47 (36%)                    | 31 (27%)                           | 103 (34%)        |
|              | 4 (Severely)   | 0                        | 2 (3%)            | 12 (9%)                     | 7 (6%)                             | 21 (7%)          |
|              | 5 (Extremely)  | 0                        | 0                 | 0                           | 3 (3%)                             | 3 (<1%)          |
| Study day 40 | n              | 0                        | 65                | 125                         | 107                                | 297              |
|              | 1 (Not at all) | 0                        | 5 (8%)            | 10 (8%)                     | 10 (9%)                            | 25 (8%)          |
|              | 2 (Slightly)   | 0                        | 31 (48%)          | 56 (45%)                    | 56 (52%)                           | 143 (48%)        |
|              | 3 (Moderately) | 0                        | 27 (42%)          | 47 (38%)                    | 30 (28%)                           | 104 (35%)        |
|              | 4 (Severely)   | 0                        | 2 (3%)            | 12 (10%)                    | 9 (8%)                             | 23 (8%)          |
|              | 5 (Extremely)  | 0                        | 0                 | 0                           | 2 (2%)                             | 2 (<1%)          |
| Study day 41 | n              | 0                        | 61                | 115                         | 97                                 | 273              |
|              | 1 (Not at all) | 0                        | 7 (11%)           | 9 (8%)                      | 11 (11%)                           | 27 (10%)         |
|              | 2 (Slightly)   | 0                        | 26 (43%)          | 51 (44%)                    | 49 (51%)                           | 126 (46%)        |
|              | 3 (Moderately) | 0                        | 27 (44%)          | 43 (37%)                    | 24 (25%)                           | 94 (34%)         |
|              | 4 (Severely)   | 0                        | 1 (2%)            | 11 (10%)                    | 10 (10%)                           | 22 (8%)          |
|              | 5 (Extremely)  | 0                        | 0                 | 1 (<1%)                     | 3 (3%)                             | 4 (1%)           |
| Study day 42 | n              | 0                        | 48                | 84                          | 73                                 | 205              |
|              | 1 (Not at all) | 0                        | 4 (8%)            | 5 (6%)                      | 9 (12%)                            | 18 (9%)          |
|              | 2 (Slightly)   | 0                        | 28 (58%)          | 36 (43%)                    | 33 (45%)                           | 97 (47%)         |
|              | 3 (Moderately) | 0                        | 15 (31%)          | 34 (40%)                    | 26 (36%)                           | 75 (37%)         |
|              | 4 (Severely)   | 0                        | 1 (2%)            | 8 (10%)                     | 5 (7%)                             | 14 (7%)          |
|              | 5 (Extremely)  | 0                        | 0                 | 1 (1%)                      | 0                                  | 1 (<1%)          |

dln73797: /arenv/arprod/ccil8781\_gr33343/asq112989/final/drivers/glass\_t001.sas 27JUL2010 20:10

Protocol: ASQ112989  
Population: Run-in

Page 1 of 3

Table 3.11  
Summary of PGAC

| Visit         | Response        | Run-in failure<br>(N=52) | Placebo<br>(N=75) | SAL 50mcg<br>BID<br>(N=152) | FSC<br>250/50mcg<br>BID<br>(N=139) | Total<br>(N=418) |
|---------------|-----------------|--------------------------|-------------------|-----------------------------|------------------------------------|------------------|
| Run-in week 1 | n               | 27                       | 66                | 143                         | 123                                | 359              |
|               | 1 (Much worse)  | 0                        | 0                 | 5 (3%)                      | 1 (<1%)                            | 6 (2%)           |
|               | 2 (Worse)       | 6 (22%)                  | 12 (18%)          | 29 (20%)                    | 28 (23%)                           | 75 (21%)         |
|               | 3 (No change)   | 17 (63%)                 | 46 (70%)          | 89 (62%)                    | 74 (60%)                           | 226 (63%)        |
|               | 4 (Better)      | 1 (4%)                   | 8 (12%)           | 18 (13%)                    | 18 (15%)                           | 45 (13%)         |
|               | 5 (Much better) | 3 (11%)                  | 0                 | 2 (1%)                      | 2 (2%)                             | 7 (2%)           |
| Run-in week 2 | n               | 18                       | 69                | 140                         | 128                                | 355              |
|               | 1 (Much worse)  | 2 (11%)                  | 1 (1%)            | 4 (3%)                      | 5 (4%)                             | 12 (3%)          |
|               | 2 (Worse)       | 4 (22%)                  | 16 (23%)          | 31 (22%)                    | 29 (23%)                           | 80 (23%)         |
|               | 3 (No change)   | 7 (39%)                  | 44 (64%)          | 81 (58%)                    | 74 (58%)                           | 206 (58%)        |
|               | 4 (Better)      | 5 (28%)                  | 8 (12%)           | 21 (15%)                    | 20 (16%)                           | 54 (15%)         |
|               | 5 (Much better) | 0                        | 0                 | 3 (2%)                      | 0                                  | 3 (<1%)          |
| Study day 8   | n               | 0                        | 67                | 134                         | 124                                | 325              |
|               | 1 (Much worse)  | 0                        | 1 (1%)            | 1 (<1%)                     | 0                                  | 2 (<1%)          |
|               | 2 (Worse)       | 0                        | 14 (21%)          | 10 (7%)                     | 8 (6%)                             | 32 (10%)         |
|               | 3 (No change)   | 0                        | 31 (46%)          | 81 (60%)                    | 64 (52%)                           | 176 (54%)        |
|               | 4 (Better)      | 0                        | 19 (28%)          | 38 (28%)                    | 49 (40%)                           | 106 (33%)        |
|               | 5 (Much better) | 0                        | 2 (3%)            | 4 (3%)                      | 3 (2%)                             | 9 (3%)           |
| Study day 15  | n               | 0                        | 65                | 132                         | 123                                | 320              |
|               | 1 (Much worse)  | 0                        | 2 (3%)            | 1 (<1%)                     | 1 (<1%)                            | 4 (1%)           |
|               | 2 (Worse)       | 0                        | 10 (15%)          | 16 (12%)                    | 13 (11%)                           | 39 (12%)         |
|               | 3 (No change)   | 0                        | 36 (55%)          | 76 (58%)                    | 67 (54%)                           | 179 (56%)        |
|               | 4 (Better)      | 0                        | 16 (25%)          | 33 (25%)                    | 40 (33%)                           | 89 (28%)         |
|               | 5 (Much better) | 0                        | 1 (2%)            | 6 (5%)                      | 2 (2%)                             | 9 (3%)           |

269

sam31676: /arenv/arprod/ccil8781\_gr33343/asq112989/final/drivers/pgac\_t001.sas 29JUL2010 10:38

CONFIDENTIAL

ASQ112989

Protocol: ASQ112989  
Population: Run-in

Page 2 of 3

Table 3.11  
Summary of PGAC

| Visit        | Response        | Run-in failure<br>(N=52) | Placebo<br>(N=75) | SAL 50mcg<br>BID<br>(N=152) | FSC<br>250/50mcg<br>BID<br>(N=139) | Total<br>(N=418) |
|--------------|-----------------|--------------------------|-------------------|-----------------------------|------------------------------------|------------------|
| Study day 22 | n               | 0                        | 64                | 129                         | 124                                | 317              |
|              | 1 (Much worse)  | 0                        | 2 (3%)            | 3 (2%)                      | 1 (<1%)                            | 6 (2%)           |
|              | 2 (Worse)       | 0                        | 9 (14%)           | 17 (13%)                    | 19 (15%)                           | 45 (14%)         |
|              | 3 (No change)   | 0                        | 39 (61%)          | 69 (53%)                    | 68 (55%)                           | 176 (56%)        |
|              | 4 (Better)      | 0                        | 12 (19%)          | 36 (28%)                    | 29 (23%)                           | 77 (24%)         |
|              | 5 (Much better) | 0                        | 2 (3%)            | 4 (3%)                      | 7 (6%)                             | 13 (4%)          |
| Study day 29 | n               | 0                        | 61                | 126                         | 117                                | 304              |
|              | 1 (Much worse)  | 0                        | 0                 | 3 (2%)                      | 0                                  | 3 (<1%)          |
|              | 2 (Worse)       | 0                        | 6 (10%)           | 15 (12%)                    | 18 (15%)                           | 39 (13%)         |
|              | 3 (No change)   | 0                        | 41 (67%)          | 80 (63%)                    | 73 (62%)                           | 194 (64%)        |
|              | 4 (Better)      | 0                        | 11 (18%)          | 22 (17%)                    | 21 (18%)                           | 54 (18%)         |
|              | 5 (Much better) | 0                        | 3 (5%)            | 6 (5%)                      | 5 (4%)                             | 14 (5%)          |
| Study day 36 | n               | 0                        | 61                | 123                         | 114                                | 298              |
|              | 1 (Much worse)  | 0                        | 0                 | 0                           | 0                                  | 0                |
|              | 2 (Worse)       | 0                        | 11 (18%)          | 16 (13%)                    | 20 (18%)                           | 47 (16%)         |
|              | 3 (No change)   | 0                        | 36 (59%)          | 79 (64%)                    | 57 (50%)                           | 172 (58%)        |
|              | 4 (Better)      | 0                        | 11 (18%)          | 24 (20%)                    | 32 (28%)                           | 67 (22%)         |
|              | 5 (Much better) | 0                        | 3 (5%)            | 4 (3%)                      | 5 (4%)                             | 12 (4%)          |
| Study day 43 | n               | 0                        | 27                | 57                          | 50                                 | 134              |
|              | 1 (Much worse)  | 0                        | 0                 | 3 (5%)                      | 1 (2%)                             | 4 (3%)           |
|              | 2 (Worse)       | 0                        | 2 (7%)            | 3 (5%)                      | 5 (10%)                            | 10 (7%)          |
|              | 3 (No change)   | 0                        | 17 (63%)          | 35 (61%)                    | 30 (60%)                           | 82 (61%)         |
|              | 4 (Better)      | 0                        | 7 (26%)           | 13 (23%)                    | 11 (22%)                           | 31 (23%)         |
|              | 5 (Much better) | 0                        | 1 (4%)            | 3 (5%)                      | 3 (6%)                             | 7 (5%)           |

sam31676: /arenv/arprod/ccil8781\_gr33343/asq112989/final/drivers/pgac\_t001.sas 29JUL2010 10:38

Protocol: ASQ112989  
Population: Run-in

Page 3 of 3

Table 3.11  
Summary of PGAC

| Visit                            | Response        | Run-in failure<br>(N=52) | Placebo<br>(N=75) | SAL 50mcg<br>BID<br>(N=152) | FSC<br>250/50mcg<br>BID<br>(N=139) | Total<br>(N=418) |
|----------------------------------|-----------------|--------------------------|-------------------|-----------------------------|------------------------------------|------------------|
| Last treatment week (Visit 3/PD) | n               | 0                        | 36                | 68                          | 63                                 | 167              |
|                                  | 1 (Much worse)  | 0                        | 0                 | 0                           | 1 (2%)                             | 1 (<1%)          |
|                                  | 2 (Worse)       | 0                        | 5 (14%)           | 5 (7%)                      | 2 (3%)                             | 12 (7%)          |
|                                  | 3 (No change)   | 0                        | 20 (56%)          | 43 (63%)                    | 41 (65%)                           | 104 (62%)        |
|                                  | 4 (Better)      | 0                        | 9 (25%)           | 16 (24%)                    | 15 (24%)                           | 40 (24%)         |
|                                  | 5 (Much better) | 0                        | 2 (6%)            | 4 (6%)                      | 4 (6%)                             | 10 (6%)          |

271

sam31676: /arenv/arprod/ccil18781\_gr33343/asq112989/final/drivers/pgac\_t001.sas 29JUL2010 10:38

CONFIDENTIAL

ASQ112989

Protocol: ASQ112989  
Population: Run-in

Page 1 of 2

Table 3.12  
Summary of PGAC Response

| Visit         | Response       | Run-in failure<br>(N=52) | Placebo<br>(N=75) | SAL 50mcg<br>BID<br>(N=152) | FSC<br>250/50mcg<br>BID<br>(N=139) | Total<br>(N=418) |
|---------------|----------------|--------------------------|-------------------|-----------------------------|------------------------------------|------------------|
| Run-in week 1 | n              | 27                       | 66                | 143                         | 123                                | 359              |
|               | Responders     | 4 (15%)                  | 8 (12%)           | 20 (14%)                    | 20 (16%)                           | 52 (14%)         |
|               | Non-responders | 23 (85%)                 | 58 (88%)          | 123 (86%)                   | 103 (84%)                          | 307 (86%)        |
| Run-in week 2 | n              | 18                       | 69                | 140                         | 128                                | 355              |
|               | Responders     | 5 (28%)                  | 8 (12%)           | 24 (17%)                    | 20 (16%)                           | 57 (16%)         |
|               | Non-responders | 13 (72%)                 | 61 (88%)          | 116 (83%)                   | 108 (84%)                          | 298 (84%)        |
| Study day 8   | n              | 0                        | 67                | 134                         | 124                                | 325              |
|               | Responders     | 0                        | 21 (31%)          | 42 (31%)                    | 52 (42%)                           | 115 (35%)        |
|               | Non-responders | 0                        | 46 (69%)          | 92 (69%)                    | 72 (58%)                           | 210 (65%)        |
| Study day 15  | n              | 0                        | 65                | 132                         | 123                                | 320              |
|               | Responders     | 0                        | 17 (26%)          | 39 (30%)                    | 42 (34%)                           | 98 (31%)         |
|               | Non-responders | 0                        | 48 (74%)          | 93 (70%)                    | 81 (66%)                           | 222 (69%)        |
| Study day 22  | n              | 0                        | 64                | 129                         | 124                                | 317              |
|               | Responders     | 0                        | 14 (22%)          | 40 (31%)                    | 36 (29%)                           | 90 (28%)         |
|               | Non-responders | 0                        | 50 (78%)          | 89 (69%)                    | 88 (71%)                           | 227 (72%)        |
| Study day 29  | n              | 0                        | 61                | 126                         | 117                                | 304              |
|               | Responders     | 0                        | 14 (23%)          | 28 (22%)                    | 26 (22%)                           | 68 (22%)         |
|               | Non-responders | 0                        | 47 (77%)          | 98 (78%)                    | 91 (78%)                           | 236 (78%)        |
| Study day 36  | n              | 0                        | 61                | 123                         | 114                                | 298              |
|               | Responders     | 0                        | 14 (23%)          | 28 (23%)                    | 37 (32%)                           | 79 (27%)         |
|               | Non-responders | 0                        | 47 (77%)          | 95 (77%)                    | 77 (68%)                           | 219 (73%)        |

A PGAC responder is defined as a subject who had a response of "better" or "much better".  
A PGAC non-responder is defined as a subject who had a response of "much worse", "worse" or "no change".  
sam31676: /arenv/arprod/ccil8781\_gr33343/asq112989/final/drivers/pgac\_t002.sas 29JUL2010 10:38

CONFIDENTIAL

ASQ112989



Protocol: ASQ112989  
Population: Run-in

Page 2 of 2

Table 3.12  
Summary of PGAC Response

| Visit                            | Response       | Run-in failure (N=52) | Placebo (N=75) | SAL 50mcg BID (N=152) | FSC 250/50mcg BID (N=139) | Total (N=418) |
|----------------------------------|----------------|-----------------------|----------------|-----------------------|---------------------------|---------------|
| Study day 43                     | n              | 0                     | 27             | 57                    | 50                        | 134           |
|                                  | Responders     | 0                     | 8 (30%)        | 16 (28%)              | 14 (28%)                  | 38 (28%)      |
|                                  | Non-responders | 0                     | 19 (70%)       | 41 (72%)              | 36 (72%)                  | 96 (72%)      |
| Last treatment week (Visit 3/PD) | n              | 0                     | 36             | 68                    | 63                        | 167           |
|                                  | Responders     | 0                     | 11 (31%)       | 20 (29%)              | 19 (30%)                  | 50 (30%)      |
|                                  | Non-responders | 0                     | 25 (69%)       | 48 (71%)              | 44 (70%)                  | 117 (70%)     |

273

A PGAC responder is defined as a subject who had a response of "better" or "much better".  
A PGAC non-responder is defined as a subject who had a response of "much worse", "worse" or "no change".  
sam31676: /arenv/arprod/ccil8781\_gr33343/asq112989/final/drivers/pgac\_t002.sas 29JUL2010 10:38

CONFIDENTIAL

ASQ112989

Protocol: ASQ112989  
 Population: Modified Intent-to-treat

Table 3.13  
 Summary of Participant Exit Evaluation

| Question                     | Response                 | Placebo<br>(N=75) | SAL 50mcg<br>BID<br>(N=151) | FSC<br>250/50mcg<br>BID<br>(N=139) | Total<br>(N=365) |
|------------------------------|--------------------------|-------------------|-----------------------------|------------------------------------|------------------|
| Confident using elec. diary  | n                        | 70                | 142                         | 126                                | 338              |
|                              | 0 (Very confident)       | 47 (67%)          | 104 (73%)                   | 91 (72%)                           | 242 (72%)        |
|                              | 1 (Somewhat confident)   | 14 (20%)          | 28 (20%)                    | 19 (15%)                           | 61 (18%)         |
|                              | 2 (Neutral)              | 7 (10%)           | 4 (3%)                      | 12 (10%)                           | 23 (7%)          |
|                              | 3 (Somewhat unconfident) | 2 (3%)            | 2 (1%)                      | 1 (<1%)                            | 5 (1%)           |
|                              | 4 (Very unconfident)     | 0                 | 4 (3%)                      | 3 (2%)                             | 7 (2%)           |
| Overall experience help desk | n                        | 70                | 142                         | 126                                | 338              |
|                              | 0 (Did not use)          | 51 (73%)          | 113 (80%)                   | 88 (70%)                           | 252 (75%)        |
|                              | 1 (Very good)            | 9 (13%)           | 13 (9%)                     | 23 (18%)                           | 45 (13%)         |
|                              | 2 (Good)                 | 7 (10%)           | 7 (5%)                      | 7 (6%)                             | 21 (6%)          |
|                              | 3 (Neutral)              | 2 (3%)            | 7 (5%)                      | 7 (6%)                             | 16 (5%)          |
|                              | 4 (Poor)                 | 1 (1%)            | 2 (1%)                      | 0                                  | 3 (<1%)          |
|                              | 5 (Very poor)            | 0                 | 0                           | 1 (<1%)                            | 1 (<1%)          |
| Easy to use electronic diary | n                        | 70                | 142                         | 126                                | 338              |
|                              | 0 (Very good)            | 26 (37%)          | 62 (44%)                    | 53 (42%)                           | 141 (42%)        |
|                              | 1 (Good)                 | 31 (44%)          | 64 (45%)                    | 51 (40%)                           | 146 (43%)        |
|                              | 2 (Neutral)              | 11 (16%)          | 11 (8%)                     | 17 (13%)                           | 39 (12%)         |
|                              | 3 (Poor)                 | 2 (3%)            | 5 (4%)                      | 4 (3%)                             | 11 (3%)          |
|                              | 4 (Very poor)            | 0                 | 0                           | 1 (<1%)                            | 1 (<1%)          |

274

sam31676: /arenv/arprod/ccil8781\_gr33343/asq112989/final/drivers/pexitev\_t001.sas 19AUG2010 13:47

Protocol: ASQ112989  
 Population: Modified Intent-to-treat

Page 2 of 2

Table 3.13  
 Summary of Participant Exit Evaluation

| Question                       | Response               | Placebo<br>(N=75) |       | SAL 50mcg<br>BID<br>(N=151) |       | FSC<br>250/50mcg<br>BID<br>(N=139) |       | Total<br>(N=365) |       |
|--------------------------------|------------------------|-------------------|-------|-----------------------------|-------|------------------------------------|-------|------------------|-------|
|                                |                        |                   |       |                             |       |                                    |       |                  |       |
| Longest eDiary completion      | 0 (2 weeks)            | 2                 | (3%)  | 7                           | (5%)  | 6                                  | (5%)  | 15               | (4%)  |
|                                | 1 (1 month)            | 7                 | (10%) | 11                          | (8%)  | 15                                 | (12%) | 33               | (10%) |
|                                | 2 (3 months)           | 11                | (16%) | 32                          | (23%) | 37                                 | (29%) | 80               | (24%) |
|                                | 3 (6 months)           | 19                | (27%) | 18                          | (13%) | 17                                 | (13%) | 54               | (16%) |
|                                | 4 (9 months)           | 2                 | (3%)  | 3                           | (2%)  | 1                                  | (<1%) | 6                | (2%)  |
|                                | 5 (1 year or more)     | 29                | (41%) | 71                          | (50%) | 49                                 | (39%) | 149              | (44%) |
| Participate using eDiary again | 0 (Very willing)       | 39                | (56%) | 85                          | (60%) | 80                                 | (63%) | 204              | (60%) |
|                                | 1 (Willing)            | 23                | (33%) | 40                          | (28%) | 34                                 | (27%) | 97               | (29%) |
|                                | 2 (Neutral)            | 7                 | (10%) | 13                          | (9%)  | 11                                 | (9%)  | 31               | (9%)  |
|                                | 3 (Unwilling)          | 1                 | (1%)  | 2                           | (1%)  | 0                                  |       | 3                | (<1%) |
|                                | 4 (Very unwilling)     | 0                 |       | 2                           | (1%)  | 1                                  | (<1%) | 3                | (<1%) |
| Rate eDiary completion         | 0 (Very easy)          | 51                | (73%) | 104                         | (73%) | 91                                 | (72%) | 246              | (73%) |
|                                | 1 (Somewhat easy)      | 12                | (17%) | 23                          | (16%) | 24                                 | (19%) | 59               | (17%) |
|                                | 2 (Neutral)            | 3                 | (4%)  | 2                           | (1%)  | 7                                  | (6%)  | 12               | (4%)  |
|                                | 3 (Somewhat difficult) | 4                 | (6%)  | 12                          | (8%)  | 3                                  | (2%)  | 19               | (6%)  |
|                                | 4 (Very difficult)     | 0                 |       | 1                           | (<1%) | 1                                  | (<1%) | 2                | (<1%) |
| Rate use of eDiary             | 0 (Very easy)          | 49                | (70%) | 105                         | (74%) | 92                                 | (73%) | 246              | (73%) |
|                                | 1 (Somewhat easy)      | 14                | (20%) | 21                          | (15%) | 21                                 | (17%) | 56               | (17%) |
|                                | 2 (Neutral)            | 2                 | (3%)  | 7                           | (5%)  | 7                                  | (6%)  | 16               | (5%)  |
|                                | 3 (Somewhat difficult) | 5                 | (7%)  | 8                           | (6%)  | 5                                  | (4%)  | 18               | (5%)  |
|                                | 4 (Very difficult)     | 0                 |       | 1                           | (<1%) | 1                                  | (<1%) | 2                | (<1%) |

275

sam31676: /arenv/arprod/ccil8781\_gr33343/asq112989/final/drivers/pexitev\_t001.sas 19AUG2010 13:47

CONFIDENTIAL

ASQ112989

Protocol: ASQ112989  
Population: Modified Intent-to-treat

Table 3.14  
Summary of FEV1

|            |        | Placebo<br>(N=75) | SAL 50mcg<br>BID (N=151) | FSC<br>250/50mcg<br>BID (N=139) | Total<br>(N=365) |
|------------|--------|-------------------|--------------------------|---------------------------------|------------------|
| Visit 2    | n      | 75                | 151                      | 139                             | 365              |
|            | Mean   | 1.332             | 1.427                    | 1.402                           | 1.398            |
|            | SD     | 0.5267            | 0.5568                   | 0.5639                          | 0.5531           |
|            | Median | 1.240             | 1.360                    | 1.310                           | 1.330            |
|            | Min.   | 0.43              | 0.41                     | 0.36                            | 0.36             |
|            | Max.   | 3.39              | 3.07                     | 2.93                            | 3.39             |
| Visit 3/PD | n      | 73                | 148                      | 135                             | 356              |
|            | Mean   | 1.336             | 1.494                    | 1.549                           | 1.483            |
|            | SD     | 0.5357            | 0.5553                   | 0.6242                          | 0.5823           |
|            | Median | 1.280             | 1.415                    | 1.510                           | 1.400            |
|            | Min.   | 0.46              | 0.54                     | 0.46                            | 0.46             |
|            | Max.   | 3.45              | 3.22                     | 3.75                            | 3.75             |

For peer review only

276

CONFIDENTIAL

ASQ112989

tlc19199: /arenv/arprod/ccil8781\_gr33343/asq112989/final/drivers/pft\_t001.sas 24AUG2010 01:57

Protocol: ASQ112989  
 Population: Modified Intent-to-treat

Page 1 of 1

Table 3.15  
 Summary of Change from Baseline in FEV1 at Visit 3/PD

|        | Placebo<br>(N=75) | SAL 50mcg<br>BID (N=151) | FSC<br>250/50mcg<br>BID (N=139) | Total<br>(N=365) |
|--------|-------------------|--------------------------|---------------------------------|------------------|
| n      | 73                | 148                      | 135                             | 356              |
| Mean   | 0.001             | 0.061                    | 0.138                           | 0.078            |
| SD     | 0.2352            | 0.2348                   | 0.3445                          | 0.2856           |
| Median | -0.010            | 0.065                    | 0.090                           | 0.060            |
| Min.   | -0.69             | -1.13                    | -0.88                           | -1.13            |
| Max.   | 1.11              | 0.90                     | 2.52                            | 2.52             |

277

CONFIDENTIAL

ASQ112989

tlc19199: /arenv/arprod/ccil8781\_gr33343/asq112989/final/drivers/pft\_t002.sas 24AUG2010 01:57

Protocol: ASQ112989  
 Population: Modified Intent-to-treat

Page 1 of 1

Table 3.16  
 Summary of FEV1 Response at Visit 3/PD

|                             | Placebo<br>(N=75) | SAL 50mcg<br>BID<br>(N=151) | FSC<br>250/50mcg<br>BID<br>(N=139) | Total<br>(N=365) |
|-----------------------------|-------------------|-----------------------------|------------------------------------|------------------|
| 3-Point Response Category n | 73                | 148                         | 135                                | 356              |
| No change or worse          | 45 (62%)          | 67 (45%)                    | 51 (38%)                           | 163 (46%)        |
| Better                      | 10 (14%)          | 25 (17%)                    | 18 (13%)                           | 53 (15%)         |
| Much better                 | 18 (25%)          | 56 (38%)                    | 66 (49%)                           | 140 (39%)        |
| Responder                   | 18 (25%)          | 56 (38%)                    | 66 (49%)                           | 140 (39%)        |
| Non-responder               | 55 (75%)          | 92 (62%)                    | 69 (51%)                           | 216 (61%)        |

278

An FEV1 responder is defined as a subject who had a change from Visit 2 to Visit 3/PD of 100 mL or more.  
 An FEV1 non-responder is defined as a subject who had a change of < 100 mL.  
 sam31676: /arenv/arprod/ccil8781\_gr33343/asq112989/final/drivers/pft\_t003a.sas 29SEP2010 11:27

CONFIDENTIAL

ASQ112989

Protocol: ASQ112989  
 Population: Modified Intent-to-treat

Page 1 of 1

Table 3.17  
 Summary of FVC

|            |        | Placebo<br>(N=75) | SAL 50mcg<br>BID (N=151) | FSC<br>250/50mcg<br>BID (N=139) | Total<br>(N=365) |
|------------|--------|-------------------|--------------------------|---------------------------------|------------------|
| Visit 2    | n      | 75                | 151                      | 139                             | 365              |
|            | Mean   | 2.632             | 2.754                    | 2.598                           | 2.669            |
|            | SD     | 0.7417            | 0.8612                   | 0.8321                          | 0.8277           |
|            | Median | 2.530             | 2.640                    | 2.530                           | 2.560            |
|            | Min.   | 1.11              | 1.05                     | 1.16                            | 1.05             |
|            | Max.   | 5.11              | 5.87                     | 4.68                            | 5.87             |
| Visit 3/PD | n      | 73                | 148                      | 135                             | 356              |
|            | Mean   | 2.636             | 2.853                    | 2.800                           | 2.788            |
|            | SD     | 0.7782            | 0.8259                   | 0.8767                          | 0.8378           |
|            | Median | 2.530             | 2.765                    | 2.760                           | 2.715            |
|            | Min.   | 1.22              | 1.12                     | 1.08                            | 1.08             |
|            | Max.   | 4.96              | 4.75                     | 4.89                            | 4.96             |

279

tlc19199: /arenv/arprod/ccil8781\_gr33343/asq112989/final/drivers/pft\_t004.sas 24AUG2010 01:56

CONFIDENTIAL

ASQ112989

Protocol: ASQ112989  
Population: Modified Intent-to-treat

Table 3.18  
Summary of Change from Baseline in FVC at Visit 3/PD

|        | Placebo<br>(N=75) | SAL 50mcg<br>BID (N=151) | FSC<br>250/50mcg<br>BID (N=139) | Total<br>(N=365) |
|--------|-------------------|--------------------------|---------------------------------|------------------|
| n      | 73                | 148                      | 135                             | 356              |
| Mean   | -0.007            | 0.081                    | 0.180                           | 0.100            |
| SD     | 0.3823            | 0.4154                   | 0.4039                          | 0.4094           |
| Median | -0.030            | 0.105                    | 0.160                           | 0.090            |
| Min.   | -1.35             | -1.53                    | -0.57                           | -1.53            |
| Max.   | 1.79              | 1.63                     | 2.55                            | 2.55             |

280

For peer review only

CONFIDENTIAL

ASQ112989

tlc19199: /arenv/arprod/ccil8781\_gr33343/asq112989/final/drivers/pft\_t005.sas 24AUG2010 01:56



Protocol: ASQ112989  
Population: Run-in

Page 1 of 2

Table 3.19  
Summary of CRQ-SAS Domain Scores

| Domain Score | Visit      |        | Run-in failure (N=52) | Placebo (N=75) | SAL 50mcg BID (N=152) | FSC 250/50mcg BID (N=139) | Total (N=418) |
|--------------|------------|--------|-----------------------|----------------|-----------------------|---------------------------|---------------|
| Dyspnoea     | Visit 2    | n      | 11                    | 75             | 152                   | 139                       | 377           |
|              |            | Mean   | 3.7                   | 4.5            | 4.2                   | 4.3                       | 4.3           |
|              |            | SD     | 1.23                  | 1.18           | 1.36                  | 1.37                      | 1.33          |
|              |            | Median | 3.6                   | 4.6            | 4.3                   | 4.4                       | 4.4           |
|              |            | Min.   | 2                     | 2              | 1                     | 1                         | 1             |
|              | Max.       | 7      | 7                     | 7              | 7                     | 7                         |               |
|              | Visit 3/PD | n      | 0                     | 73             | 149                   | 136                       | 358           |
|              |            | Mean   |                       | 4.6            | 4.5                   | 4.8                       | 4.6           |
|              |            | SD     |                       | 1.17           | 1.35                  | 1.39                      | 1.33          |
|              |            | Median |                       | 4.8            | 4.6                   | 5.0                       | 4.8           |
| Min.         |            |        | 1                     | 1              | 2                     | 1                         |               |
| Fatigue      | Visit 2    | n      | 11                    | 75             | 152                   | 139                       | 377           |
|              |            | Mean   | 3.8                   | 4.0            | 3.6                   | 3.6                       | 3.7           |
|              |            | SD     | 1.71                  | 1.13           | 1.25                  | 1.17                      | 1.22          |
|              |            | Median | 3.8                   | 4.0            | 3.8                   | 3.8                       | 3.8           |
|              |            | Min.   | 1                     | 2              | 1                     | 1                         | 1             |
|              | Max.       | 7      | 6                     | 6              | 6                     | 7                         |               |
|              | Visit 3/PD | n      | 0                     | 73             | 149                   | 136                       | 358           |
|              |            | Mean   |                       | 4.2            | 3.8                   | 3.9                       | 3.9           |
|              |            | SD     |                       | 1.12           | 1.29                  | 1.18                      | 1.22          |
|              |            | Median |                       | 4.0            | 4.0                   | 4.0                       | 4.0           |
| Min.         |            |        | 2                     | 1              | 1                     | 1                         |               |
| Max.         |            | 7      | 7                     | 6              | 7                     |                           |               |

N.B. Each CRQ-SAS domain score is calculated as the mean of responses to the relevant questions and is calculated if at least one response was recorded for the domain.

sam31676: /arenv/arprod/ccil8781\_gr33343/asq112989/final/drivers/crqsas\_t001.sas 30JUL2010 11:08

281

CONFIDENTIAL

ASQ112989

Protocol: ASQ112989  
Population: Run-in

Page 2 of 2

Table 3.19  
Summary of CRQ-SAS Domain Scores

| Domain Score       | Visit      |        | Run-in failure (N=52) | Placebo (N=75) | SAL 50mcg BID (N=152) | FSC 250/50mcg BID (N=139) | Total (N=418) |
|--------------------|------------|--------|-----------------------|----------------|-----------------------|---------------------------|---------------|
| Emotional Function | Visit 2    | n      | 11                    | 75             | 152                   | 139                       | 377           |
|                    |            | Mean   | 4.1                   | 4.5            | 4.4                   | 4.4                       | 4.4           |
|                    |            | SD     | 1.62                  | 1.05           | 1.18                  | 1.22                      | 1.18          |
|                    |            | Median | 3.9                   | 4.6            | 4.4                   | 4.4                       | 4.4           |
|                    |            | Min.   | 2                     | 2              | 1                     | 1                         | 1             |
|                    | Max.       | 7      | 7                     | 7              | 7                     | 7                         |               |
|                    | Visit 3/PD | n      | 0                     | 73             | 149                   | 136                       | 358           |
|                    |            | Mean   |                       | 4.8            | 4.5                   | 4.5                       | 4.5           |
|                    |            | SD     |                       | 1.14           | 1.28                  | 1.23                      | 1.24          |
|                    |            | Median |                       | 4.7            | 4.4                   | 4.5                       | 4.6           |
| Min.               |            |        | 2                     | 2              | 1                     | 1                         |               |
| Mastery            | Visit 2    | n      | 11                    | 75             | 152                   | 139                       | 377           |
|                    |            | Mean   | 4.4                   | 4.7            | 4.3                   | 4.5                       | 4.5           |
|                    |            | SD     | 1.61                  | 1.18           | 1.29                  | 1.34                      | 1.30          |
|                    |            | Median | 4.8                   | 4.5            | 4.3                   | 4.5                       | 4.5           |
|                    |            | Min.   | 1                     | 2              | 1                     | 2                         | 1             |
|                    | Max.       | 7      | 7                     | 7              | 7                     | 7                         |               |
|                    | Visit 3/PD | n      | 0                     | 73             | 149                   | 136                       | 358           |
|                    |            | Mean   |                       | 4.9            | 4.7                   | 4.9                       | 4.8           |
|                    |            | SD     |                       | 1.27           | 1.36                  | 1.34                      | 1.34          |
|                    |            | Median |                       | 4.8            | 4.5                   | 5.0                       | 4.8           |
| Min.               |            |        | 2                     | 2              | 1                     | 1                         |               |
| Max.               |            | 7      | 7                     | 7              | 7                     |                           |               |

N.B. Each CRQ-SAS domain score is calculated as the mean of responses to the relevant questions and is calculated if at least one response was recorded for the domain.

sam31676: /arenv/arprod/ccil18781\_gr33343/asq112989/final/drivers/crqsas\_t001.sas 30JUL2010 11:08

CONFIDENTIAL

ASQ112989

Protocol: ASQ112989  
 Population: Modified Intent-to-treat

Page 1 of 1

Table 3.20  
 Summary of Change from Baseline in CRQ-SAS Domain Scores at Visit 3/PD

| Domain Score          |        | Placebo<br>(N=75) | SAL 50mcg<br>BID (N=151) | FSC<br>250/50mcg<br>BID (N=139) | Total<br>(N=365) |
|-----------------------|--------|-------------------|--------------------------|---------------------------------|------------------|
| Dyspnoea              | n      | 73                | 149                      | 136                             | 358              |
|                       | Mean   | 0.1               | 0.3                      | 0.4                             | 0.3              |
|                       | SD     | 1.09              | 1.14                     | 0.99                            | 1.08             |
|                       | Median | 0.2               | 0.2                      | 0.4                             | 0.3              |
|                       | Min.   | -5                | -3                       | -2                              | -5               |
|                       | Max.   | 3                 | 3                        | 4                               | 4                |
| Fatigue               | n      | 73                | 149                      | 136                             | 358              |
|                       | Mean   | 0.2               | 0.2                      | 0.3                             | 0.2              |
|                       | SD     | 0.91              | 0.94                     | 1.02                            | 0.97             |
|                       | Median | 0.3               | 0.0                      | 0.3                             | 0.0              |
|                       | Min.   | -2                | -2                       | -2                              | -2               |
|                       | Max.   | 3                 | 3                        | 4                               | 4                |
| Emotional<br>Function | n      | 73                | 149                      | 136                             | 358              |
|                       | Mean   | 0.2               | 0.1                      | 0.1                             | 0.1              |
|                       | SD     | 0.83              | 0.94                     | 0.90                            | 0.91             |
|                       | Median | 0.3               | 0.0                      | 0.0                             | 0.1              |
|                       | Min.   | -2                | -3                       | -2                              | -3               |
|                       | Max.   | 2                 | 3                        | 3                               | 3                |
| Mastery               | n      | 73                | 149                      | 136                             | 358              |
|                       | Mean   | 0.2               | 0.3                      | 0.4                             | 0.3              |
|                       | SD     | 0.96              | 1.04                     | 1.06                            | 1.03             |
|                       | Median | 0.0               | 0.3                      | 0.3                             | 0.3              |
|                       | Min.   | -2                | -2                       | -3                              | -3               |
|                       | Max.   | 3                 | 4                        | 5                               | 5                |

N.B. Each CRQ-SAS domain score is calculated as the mean of responses to the relevant questions and is calculated if at least one response was recorded for the domain.

sam31676: /arenv/arprod/ccil8781\_gr33343/asq112989/final/drivers/crqsas\_t002.sas 30JUL2010 11:08

283

CONFIDENTIAL

ASQ112989

Protocol: ASQ112989  
 Population: Modified Intent-to-treat

Page 1 of 1

Table 3.21  
 Summary of CRQ-SAS Dyspnoea Domain Response

|                             | Placebo<br>(N=75) | SAL 50mcg<br>BID<br>(N=151) | FSC<br>250/50mcg<br>BID<br>(N=139) | Total<br>(N=365) |
|-----------------------------|-------------------|-----------------------------|------------------------------------|------------------|
| 3-Point Response Category n | 73                | 149                         | 136                                | 358              |
| No change or worse          | 34 (47%)          | 65 (44%)                    | 48 (35%)                           | 147 (41%)        |
| Better                      | 14 (19%)          | 33 (22%)                    | 28 (21%)                           | 75 (21%)         |
| Much better                 | 25 (34%)          | 51 (34%)                    | 60 (44%)                           | 136 (38%)        |
| Responder                   | 25 (34%)          | 55 (37%)                    | 63 (46%)                           | 143 (40%)        |
| Non-responder               | 48 (66%)          | 94 (63%)                    | 73 (54%)                           | 215 (60%)        |

284

CRQ-SAS dyspnoea domain responder is defined as a subject who had a change in score for the dyspnoea domain of the CRQ-SAS between Visit 2 and Visit 3/PD of 0.5 units or more. A CRQ-SAS dyspnoea domain non-responder is defined as a subject who had a change in score of less than 0.5 units. N.B. CRQ-SAS dyspnoea domain score is calculated as the mean of responses to questions 1 to 5, and is calculated if at least one response was recorded.

sam31676: /arenv/arprod/ccil8781\_gr33343/asq112989/final/drivers/crqsas\_t003a.sas 29SEP2010 11:36

CONFIDENTIAL

ASQ112989

Protocol: ASQ112989  
Population: Run-in

Page 1 of 1

Table 3.22  
Summary of CGI-S

| Visit      | Response        | Run-in failure<br>(N=52) | Placebo<br>(N=75) | SAL 50mcg<br>BID<br>(N=152) | FSC<br>250/50mcg<br>BID<br>(N=139) | Total<br>(N=418) |
|------------|-----------------|--------------------------|-------------------|-----------------------------|------------------------------------|------------------|
| Visit 2    | n               | 8                        | 75                | 151                         | 139                                | 373              |
|            | 1 (Mild)        | 0                        | 6 (8%)            | 10 (7%)                     | 9 (6%)                             | 25 (7%)          |
|            | 2 (Moderate)    | 6 (75%)                  | 53 (71%)          | 103 (68%)                   | 94 (68%)                           | 256 (69%)        |
|            | 3 (Severe)      | 1 (13%)                  | 15 (20%)          | 37 (25%)                    | 33 (24%)                           | 86 (23%)         |
|            | 4 (Very Severe) | 1 (13%)                  | 1 (1%)            | 1 (<1%)                     | 3 (2%)                             | 6 (2%)           |
| Visit 3/PD | n               | 0                        | 72                | 148                         | 133                                | 353              |
|            | 1 (Mild)        | 0                        | 12 (17%)          | 11 (7%)                     | 33 (25%)                           | 56 (16%)         |
|            | 2 (Moderate)    | 0                        | 43 (60%)          | 111 (75%)                   | 85 (64%)                           | 239 (68%)        |
|            | 3 (Severe)      | 0                        | 17 (24%)          | 26 (18%)                    | 14 (11%)                           | 57 (16%)         |
|            | 4 (Very Severe) | 0                        | 0                 | 0                           | 1 (<1%)                            | 1 (<1%)          |

285

dln73797: /arenv/arprod/ccil8781\_gr33343/asq112989/final/drivers/cgis\_t001.sas 27JUL2010 20:07

CONFIDENTIAL

ASQ112989

Protocol: ASQ112989  
Population: Modified Intent-to-treat

Table 3.23  
Summary of CGI-C

|                 | Placebo<br>(N=75) | SAL 50mcg<br>BID<br>(N=151) | FSC<br>250/50mcg<br>BID<br>(N=139) | Total<br>(N=365) |
|-----------------|-------------------|-----------------------------|------------------------------------|------------------|
| n               | 73                | 149                         | 136                                | 358              |
| 1 (Much worse)  | 1 (1%)            | 0                           | 0                                  | 1 (<1%)          |
| 2 (Worse)       | 13 (18%)          | 14 (9%)                     | 5 (4%)                             | 32 (9%)          |
| 3 (No change)   | 40 (55%)          | 80 (54%)                    | 65 (48%)                           | 185 (52%)        |
| 4 (Better)      | 15 (21%)          | 52 (35%)                    | 61 (45%)                           | 128 (36%)        |
| 5 (Much better) | 4 (5%)            | 3 (2%)                      | 5 (4%)                             | 12 (3%)          |
| Responder       | 19 (26%)          | 55 (37%)                    | 66 (49%)                           | 140 (39%)        |
| Non-responder   | 54 (74%)          | 94 (63%)                    | 70 (51%)                           | 218 (61%)        |

286

CONFIDENTIAL

ASQ112989

A CGI-C responder is defined as a subject who had a response of "better" or "much better".  
A CGI-C non-responder is defined as a subject who had a response of "much worse", "worse" or "no change".  
dln73797: /arenv/arprod/ccil8781\_gr33343/asq112989/final/drivers/cgic\_t001.sas 27JUL2010 20:07

Protocol: ASQ112989  
 Population: Run-in

Page 1 of 3

Table 3.24  
 Summary of Participant-Completed mMRC Dyspnoea Scale

| Visit     |                                                                                     | Run-in failure (N=52) | Placebo (N=75) | SAL 50mcg BID (N=152) | FSC 250/50mcg BID (N=139) | Total (N=418) |           |
|-----------|-------------------------------------------------------------------------------------|-----------------------|----------------|-----------------------|---------------------------|---------------|-----------|
| Screening | mMRC Score                                                                          | n                     | 51             | 75                    | 152                       | 139           | 417       |
|           |                                                                                     | Mean                  | 2.1            | 2.3                   | 2.3                       | 2.3           | 2.3       |
|           |                                                                                     | SD                    | 0.93           | 0.87                  | 0.84                      | 0.87          | 0.87      |
|           |                                                                                     | Median                | 2.0            | 2.0                   | 2.0                       | 2.0           | 2.0       |
|           |                                                                                     | Min.                  | 0              | 1                     | 0                         | 0             | 0         |
|           |                                                                                     | Max.                  | 4              | 4                     | 4                         | 4             | 4         |
|           | 0 (Not troubled with breathlessness except with strenuous exercise)                 |                       | 2 (4%)         | 0                     | 1 (<1%)                   | 2 (1%)        | 5 (1%)    |
|           | 1 (Troubled by shortness of breath when hurrying on level/walking up slight hill)   |                       | 11 (22%)       | 12 (16%)              | 22 (14%)                  | 20 (14%)      | 65 (16%)  |
|           | 2 (Walks slower than others of same age on level b/c breathlessness)                |                       | 23 (45%)       | 35 (47%)              | 63 (41%)                  | 64 (46%)      | 185 (44%) |
|           | 3 (Stops to breathe after walking about 100 yards/meters or after few min on level) |                       | 12 (24%)       | 20 (27%)              | 55 (36%)                  | 41 (29%)      | 128 (31%) |
|           | 4 (Too breathless to leave house or breathless when dressing or undressing)         |                       | 3 (6%)         | 8 (11%)               | 11 (7%)                   | 12 (9%)       | 34 (8%)   |

287

dln73797: /arenv/arprod/ccil8781\_gr33343/asq112989/final/drivers/mmrc\_t001.sas 27JUL2010 20:07

CONFIDENTIAL

ASQ112989

Protocol: ASQ112989  
Population: Run-in

Page 2 of 3

Table 3.24  
Summary of Participant-Completed mMRC Dyspnoea Scale

| Visit   |                                                                                     | Run-in failure (N=52) | Placebo (N=75) | SAL 50mcg BID (N=152) | FSC 250/50mcg BID (N=139) | Total (N=418) |           |
|---------|-------------------------------------------------------------------------------------|-----------------------|----------------|-----------------------|---------------------------|---------------|-----------|
| Visit 2 | mMRC Score                                                                          | n                     | 11             | 75                    | 152                       | 139           | 377       |
|         |                                                                                     | Mean                  | 2.0            | 1.8                   | 2.0                       | 1.9           | 1.9       |
|         |                                                                                     | SD                    | 1.18           | 0.83                  | 0.97                      | 0.98          | 0.95      |
|         |                                                                                     | Median                | 2.0            | 2.0                   | 2.0                       | 2.0           | 2.0       |
|         |                                                                                     | Min.                  | 1              | 0                     | 0                         | 0             | 0         |
|         |                                                                                     | Max.                  | 4              | 4                     | 4                         | 4             | 4         |
|         | 0 (Not troubled with breathlessness except with strenuous exercise)                 |                       | 0              | 4 (5%)                | 6 (4%)                    | 5 (4%)        | 15 (4%)   |
|         | 1 (Troubled by shortness of breath when hurrying on level/walking up slight hill)   |                       | 5 (45%)        | 21 (28%)              | 43 (28%)                  | 45 (32%)      | 114 (30%) |
|         | 2 (Walks slower than others of same age on level b/c breathlessness)                |                       | 3 (27%)        | 39 (52%)              | 53 (35%)                  | 53 (38%)      | 148 (39%) |
|         | 3 (Stops to breathe after walking about 100 yards/meters or after few min on level) |                       | 1 (9%)         | 9 (12%)               | 42 (28%)                  | 25 (18%)      | 77 (20%)  |
|         | 4 (Too breathless to leave house or breathless when dressing or undressing)         |                       | 2 (18%)        | 2 (3%)                | 8 (5%)                    | 11 (8%)       | 23 (6%)   |

dln73797: /arenv/arprod/ccil8781\_gr33343/asq112989/final/drivers/mmrc\_t001.sas 27JUL2010 20:07

CONFIDENTIAL

ASQ112989



Protocol: ASQ112989  
 Population: Run-in

Page 3 of 3

Table 3.24  
 Summary of Participant-Completed mMRC Dyspnoea Scale

| Visit                 |                                                                                     | Run-in failure (N=52) | Placebo (N=75) | SAL 50mcg BID (N=152) | FSC 250/50mcg BID (N=139) | Total (N=418) |
|-----------------------|-------------------------------------------------------------------------------------|-----------------------|----------------|-----------------------|---------------------------|---------------|
| Visit 3/PD mMRC Score | n                                                                                   | 73                    | 149            | 136                   | 358                       |               |
|                       | Mean                                                                                | 1.7                   | 1.8            | 1.6                   | 1.7                       |               |
|                       | SD                                                                                  | 0.76                  | 0.94           | 0.81                  | 0.86                      |               |
|                       | Median                                                                              | 2.0                   | 2.0            | 2.0                   | 2.0                       |               |
|                       | Min.                                                                                | 0                     | 0              | 0                     | 0                         |               |
|                       | Max.                                                                                | 3                     | 4              | 4                     | 4                         |               |
|                       | 0 (Not troubled with breathlessness except with strenuous exercise)                 | 0                     | 3 (4%)         | 14 (9%)               | 7 (5%)                    | 24 (7%)       |
|                       | 1 (Troubled by shortness of breath when hurrying on level/walking up slight hill)   | 0                     | 28 (38%)       | 39 (26%)              | 59 (43%)                  | 126 (35%)     |
|                       | 2 (Walks slower than others of same age on level b/c breathlessness)                | 0                     | 32 (44%)       | 58 (39%)              | 53 (39%)                  | 143 (40%)     |
|                       | 3 (Stops to breathe after walking about 100 yards/meters or after few min on level) | 0                     | 10 (14%)       | 37 (25%)              | 15 (11%)                  | 62 (17%)      |
|                       | 4 (Too breathless to leave house or breathless when dressing or undressing)         | 0                     | 0              | 1 (<1%)               | 2 (1%)                    | 3 (<1%)       |

289

dln73797: /arenv/arprod/ccil8781\_gr33343/asq112989/final/drivers/mmrc\_t001.sas 27JUL2010 20:07

CONFIDENTIAL

ASQ112989

Protocol: ASQ112989  
Population: Modified Intent-to-treat

Table 3.25  
Summary of Participant-Completed mMRC Response

|               | Placebo<br>(N=75) | SAL 50mcg<br>BID<br>(N=151) | FSC<br>250/50mcg<br>BID<br>(N=139) | Total<br>(N=365) |
|---------------|-------------------|-----------------------------|------------------------------------|------------------|
| Responder     | 16 (22%)          | 44 (30%)                    | 48 (35%)                           | 108 (30%)        |
| Non-responder | 57 (78%)          | 105 (70%)                   | 88 (65%)                           | 250 (70%)        |

For peer review only

290

CONFIDENTIAL

ASQ112989

A patient-completed mMRC responder is defined as a subject who had a change in score between Visit 2 and Visit 3/PD of 1 unit or more. A patient-completed mMRC non-responder is defined as a subject who had a change of less than 1 unit.

dln73797: /arenv/arprod/ccil8781\_gr33343/asq112989/final/drivers/mmrc\_t002.sas 27JUL2010 20:10

Protocol: ASQ112989  
Population: Run-in

Page 1 of 3

Table 3.26  
Summary of Physician-Completed mMRC Dyspnoea Scale

| Visit     |                                                                                     | Run-in failure (N=52) | Placebo (N=75) | SAL 50mcg BID (N=152) | FSC 250/50mcg BID (N=139) | Total (N=418) |           |
|-----------|-------------------------------------------------------------------------------------|-----------------------|----------------|-----------------------|---------------------------|---------------|-----------|
| Screening | mMRC Score                                                                          | n                     | 51             | 75                    | 152                       | 139           | 417       |
|           |                                                                                     | Mean                  | 2.3            | 2.5                   | 2.5                       | 2.4           | 2.4       |
|           |                                                                                     | SD                    | 0.58           | 0.64                  | 0.57                      | 0.51          | 0.57      |
|           |                                                                                     | Median                | 2.0            | 2.0                   | 2.0                       | 2.0           | 2.0       |
|           |                                                                                     | Min.                  | 1              | 2                     | 2                         | 2             | 1         |
|           |                                                                                     | Max.                  | 4              | 4                     | 4                         | 4             | 4         |
|           | 0 (Not troubled with breathlessness except with strenuous exercise)                 |                       | 0              | 0                     | 0                         | 0             | 0         |
|           | 1 (Troubled by shortness of breath when hurrying on level/walking up slight hill)   |                       | 2 (4%)         | 0                     | 0                         | 0             | 2 (<1%)   |
|           | 2 (Walks slower than others of same age on level b/c breathlessness)                |                       | 33 (65%)       | 43 (57%)              | 86 (57%)                  | 78 (56%)      | 240 (58%) |
|           | 3 (Stops to breathe after walking about 100 yards/meters or after few min on level) |                       | 15 (29%)       | 26 (35%)              | 60 (39%)                  | 60 (43%)      | 161 (39%) |
|           | 4 (Too breathless to leave house or breathless when dressing or undressing)         |                       | 1 (2%)         | 6 (8%)                | 6 (4%)                    | 1 (<1%)       | 14 (3%)   |

291

dln73797: /arenv/arprod/ccil8781\_gr33343/asq112989/final/drivers/mmrc\_t003.sas 27JUL2010 20:10

CONFIDENTIAL

ASQ112989

Protocol: ASQ112989  
Population: Run-in

Page 2 of 3

Table 3.26  
Summary of Physician-Completed mMRC Dyspnoea Scale

| Visit   |                                                                                     | Run-in failure (N=52) | Placebo (N=75) | SAL 50mcg BID (N=152) | FSC 250/50mcg BID (N=139) | Total (N=418) |           |
|---------|-------------------------------------------------------------------------------------|-----------------------|----------------|-----------------------|---------------------------|---------------|-----------|
| Visit 2 | mMRC Score                                                                          | n                     | 10             | 75                    | 151                       | 139           | 375       |
|         |                                                                                     | Mean                  | 2.2            | 2.3                   | 2.4                       | 2.4           | 2.4       |
|         |                                                                                     | SD                    | 0.92           | 0.62                  | 0.57                      | 0.62          | 0.61      |
|         |                                                                                     | Median                | 2.0            | 2.0                   | 2.0                       | 2.0           | 2.0       |
|         |                                                                                     | Min.                  | 1              | 1                     | 1                         | 0             | 0         |
|         |                                                                                     | Max.                  | 4              | 4                     | 4                         | 4             | 4         |
|         | 0 (Not troubled with breathlessness except with strenuous exercise)                 |                       | 0              | 0                     | 0                         | 1 (<1%)       | 1 (<1%)   |
|         | 1 (Troubled by shortness of breath when hurrying on level/walking up slight hill)   |                       | 2 (20%)        | 3 (4%)                | 2 (1%)                    | 5 (4%)        | 12 (3%)   |
|         | 2 (Walks slower than others of same age on level b/c breathlessness)                |                       | 5 (50%)        | 48 (64%)              | 92 (61%)                  | 80 (58%)      | 225 (60%) |
|         | 3 (Stops to breathe after walking about 100 yards/meters or after few min on level) |                       | 2 (20%)        | 21 (28%)              | 53 (35%)                  | 50 (36%)      | 126 (34%) |
|         | 4 (Too breathless to leave house or breathless when dressing or undressing)         |                       | 1 (10%)        | 3 (4%)                | 4 (3%)                    | 3 (2%)        | 11 (3%)   |

dln73797: /arenv/arprod/ccil8781\_gr33343/asq112989/final/drivers/mmrc\_t003.sas 27JUL2010 20:10

CONFIDENTIAL

ASQ112989

Protocol: ASQ112989  
Population: Run-in

Page 3 of 3

Table 3.26  
Summary of Physician-Completed mMRC Dyspnoea Scale

| Visit                 |                                                                                     | Run-in failure (N=52) | Placebo (N=75) | SAL 50mcg BID (N=152) | FSC 250/50mcg BID (N=139) | Total (N=418) |
|-----------------------|-------------------------------------------------------------------------------------|-----------------------|----------------|-----------------------|---------------------------|---------------|
| Visit 3/PD mMRC Score | n                                                                                   | 73                    | 149            | 136                   | 358                       |               |
|                       | Mean                                                                                | 2.2                   | 2.2            | 2.0                   | 2.1                       |               |
|                       | SD                                                                                  | 0.79                  | 0.71           | 0.76                  | 0.75                      |               |
|                       | Median                                                                              | 2.0                   | 2.0            | 2.0                   | 2.0                       |               |
|                       | Min.                                                                                | 0                     | 0              | 0                     | 0                         |               |
|                       | Max.                                                                                | 4                     | 4              | 4                     | 4                         |               |
|                       | 0 (Not troubled with breathlessness except with strenuous exercise)                 | 0                     | 1 (1%)         | 1 (<1%)               | 2 (1%)                    | 4 (1%)        |
|                       | 1 (Troubled by shortness of breath when hurrying on level/walking up slight hill)   | 0                     | 12 (16%)       | 23 (15%)              | 32 (24%)                  | 67 (19%)      |
|                       | 2 (Walks slower than others of same age on level b/c breathlessness)                | 0                     | 38 (52%)       | 79 (53%)              | 72 (53%)                  | 189 (53%)     |
|                       | 3 (Stops to breathe after walking about 100 yards/meters or after few min on level) | 0                     | 19 (26%)       | 44 (30%)              | 27 (20%)                  | 90 (25%)      |
|                       | 4 (Too breathless to leave house or breathless when dressing or undressing)         | 0                     | 3 (4%)         | 2 (1%)                | 3 (2%)                    | 8 (2%)        |

293

dln73797: /arenv/arprod/ccil8781\_gr33343/asq112989/final/drivers/mmrc\_t003.sas 27JUL2010 20:10

CONFIDENTIAL

ASQ112989

Protocol: ASQ112989  
Population: Modified Intent-to-treat

Table 3.27  
Summary of Physician-Completed mMRC Response

|               | Placebo<br>(N=75) | SAL 50mcg<br>BID<br>(N=151) | FSC<br>250/50mcg<br>BID<br>(N=139) | Total<br>(N=365) |
|---------------|-------------------|-----------------------------|------------------------------------|------------------|
| Responder     | 17 (23%)          | 42 (28%)                    | 45 (33%)                           | 104 (29%)        |
| Non-responder | 56 (77%)          | 106 (72%)                   | 91 (67%)                           | 253 (71%)        |

For peer review only

294

CONFIDENTIAL

ASQ112989

A physician-completed mMRC responder is defined as a subject who had a change in score between Visit 2 and Visit 3/PD of 1 unit or more. A physician-completed mMRC non-responder is defined as a subject who had a change of less than 1 unit.

dln73797: /arenv/arprod/ccil8781\_gr33343/asq112989/final/drivers/mmrc\_t004.sas 27JUL2010 20:10

Protocol: ASQ112989  
 Population: Modified Intent-to-treat

Page 1 of 1

Table 4.01  
 Summary of Exposure to Study Drug

|                     |            | Placebo<br>(N=75) | SAL 50mcg BID<br>(N=151) | FSC 250/50mcg<br>BID<br>(N=139) |
|---------------------|------------|-------------------|--------------------------|---------------------------------|
| Exposure (Days) [1] | n          | 75                | 151                      | 139                             |
|                     | Mean       | 40.0              | 40.5                     | 39.7                            |
|                     | SD         | 8.18              | 6.04                     | 7.75                            |
|                     | Median     | 42.0              | 42.0                     | 42.0                            |
|                     | Min.       | 1                 | 3                        | 1                               |
|                     | Max.       | 55                | 47                       | 52                              |
| Range of Exposure   | <=7 days   | 2 (3%)            | 1 (<1%)                  | 3 (2%)                          |
|                     | 8-14 days  | 1 (1%)            | 2 (1%)                   | 2 (1%)                          |
|                     | 15-28 days | 2 (3%)            | 6 (4%)                   | 5 (4%)                          |
|                     | 29-42 days | 61 (81%)          | 110 (73%)                | 101 (73%)                       |
|                     | >42 days   | 9 (12%)           | 32 (21%)                 | 28 (20%)                        |

295

[1] Calculated as ((date of last dose - date of first dose) + 1)  
 dln73797: /arenv/arprod/ccil8781\_gr33343/asq112989/final/drivers/ex\_t001.sas 27JUL2010 20:13

CONFIDENTIAL

ASQ112989

Protocol: ASQ112989  
 Population: Modified Intent-to-treat

Page 1 of 1

Table 4.02  
 On-Treatment Adverse Event Overview

|                                                               | Placebo<br>(N=75) |       | SAL 50mcg<br>BID<br>(N=151) |       | FSC<br>250/50mcg<br>BID<br>(N=139) |       |
|---------------------------------------------------------------|-------------------|-------|-----------------------------|-------|------------------------------------|-------|
| Any AE                                                        | 14                | (19%) | 34                          | (23%) | 37                                 | (27%) |
| AE related to study treatment                                 | 3                 | (4%)  | 9                           | (6%)  | 4                                  | (3%)  |
| AE leading to permanent<br>discontinuation of study treatment | 3                 | (4%)  | 3                           | (2%)  | 7                                  | (5%)  |
| AE leading to dose reduction                                  | 0                 |       | 0                           |       | 0                                  |       |
| AE leading to dose interruption/delay                         | 1                 | (1%)  | 3                           | (2%)  | 0                                  |       |
| Any SAE                                                       | 4                 | (5%)  | 5                           | (3%)  | 3                                  | (2%)  |
| SAE related to study treatment                                | 2                 | (3%)  | 1                           | (<1%) | 0                                  |       |
| Fatal SAE                                                     | 0                 |       | 0                           |       | 1                                  | (<1%) |
| Fatal SAE related to study treatment                          | 0                 |       | 0                           |       | 0                                  |       |

296

dln73797: /arenv/arprod/ccil8781\_gr33343/asq112989/final/drivers/ae\_t009\_over.sas 27JUL2010 20:14

CONFIDENTIAL

ASQ112989



Protocol: ASQ112989  
 Population: Modified Intent-to-treat

Page 1 of 5

Table 4.03  
 Summary of On-Treatment Adverse Events

| System Organ Class<br>Preferred Term            | Placebo<br>(N=75) | SAL 50mcg<br>BID<br>(N=151) | FSC<br>250/50mcg<br>BID<br>(N=139) |
|-------------------------------------------------|-------------------|-----------------------------|------------------------------------|
| ANY EVENT                                       | 14 (19%)          | 34 (23%)                    | 37 (27%)                           |
| Respiratory, thoracic and mediastinal disorders |                   |                             |                                    |
| Any event                                       | 7 (9%)            | 14 (9%)                     | 7 (5%)                             |
| Chronic obstructive pulmonary disease           | 4 (5%)            | 3 (2%)                      | 0                                  |
| Dyspnoea                                        | 2 (3%)            | 4 (3%)                      | 1 (<1%)                            |
| Cough                                           | 0                 | 3 (2%)                      | 2 (1%)                             |
| Oropharyngeal pain                              | 0                 | 3 (2%)                      | 0                                  |
| Sinus congestion                                | 0                 | 1 (<1%)                     | 2 (1%)                             |
| Respiratory tract congestion                    | 0                 | 2 (1%)                      | 0                                  |
| Acute respiratory failure                       | 0                 | 1 (<1%)                     | 0                                  |
| Dysphonia                                       | 0                 | 0                           | 1 (<1%)                            |
| Epistaxis                                       | 1 (1%)            | 0                           | 0                                  |
| Nasal congestion                                | 0                 | 1 (<1%)                     | 0                                  |
| Pneumothorax                                    | 0                 | 1 (<1%)                     | 0                                  |
| Respiratory failure                             | 0                 | 0                           | 1 (<1%)                            |
| Rhinitis allergic                               | 0                 | 0                           | 1 (<1%)                            |
| Rhinorrhoea                                     | 1 (1%)            | 0                           | 0                                  |
| Infections and infestations                     |                   |                             |                                    |
| Any event                                       | 4 (5%)            | 9 (6%)                      | 10 (7%)                            |
| Candidiasis                                     | 1 (1%)            | 0                           | 3 (2%)                             |
| Nasopharyngitis                                 | 1 (1%)            | 2 (1%)                      | 1 (<1%)                            |
| Bronchitis                                      | 0                 | 1 (<1%)                     | 1 (<1%)                            |
| Gastroenteritis viral                           | 0                 | 1 (<1%)                     | 1 (<1%)                            |
| Influenza                                       | 0                 | 1 (<1%)                     | 1 (<1%)                            |
| Pneumonia                                       | 0                 | 2 (1%)                      | 0                                  |
| Respiratory tract infection                     | 2 (3%)            | 0                           | 0                                  |
| Acute sinusitis                                 | 0                 | 0                           | 1 (<1%)                            |
| Gastric infection                               | 1 (1%)            | 0                           | 0                                  |

dln73797: /arenv/arprod/ccil8781\_gr33343/asq112989/final/drivers/ae\_t001\_on.sas 27JUL2010 20:30

297

CONFIDENTIAL

ASQ112989

Protocol: ASQ112989  
 Population: Modified Intent-to-treat

Page 2 of 5

Table 4.03  
 Summary of On-Treatment Adverse Events

| System Organ Class<br>Preferred Term    | Placebo<br>(N=75) | SAL 50mcg<br>BID<br>(N=151) | FSC<br>250/50mcg<br>BID<br>(N=139) |
|-----------------------------------------|-------------------|-----------------------------|------------------------------------|
| Pharyngitis                             | 0                 | 0                           | 1 (<1%)                            |
| Pneumonia klebsiella                    | 0                 | 1 (<1%)                     | 0                                  |
| Sinusitis                               | 0                 | 0                           | 1 (<1%)                            |
| Tracheobronchitis                       | 0                 | 1 (<1%)                     | 0                                  |
| Upper respiratory tract infection       | 0                 | 0                           | 1 (<1%)                            |
| Viral upper respiratory tract infection | 0                 | 1 (<1%)                     | 0                                  |
| <b>Nervous system disorders</b>         |                   |                             |                                    |
| Any event                               | 3 (4%)            | 8 (5%)                      | 8 (6%)                             |
| Headache                                | 2 (3%)            | 6 (4%)                      | 5 (4%)                             |
| Sinus headache                          | 0                 | 0                           | 3 (2%)                             |
| Carpal tunnel syndrome                  | 0                 | 1 (<1%)                     | 0                                  |
| Cerebrovascular accident                | 0                 | 1 (<1%)                     | 0                                  |
| Dizziness                               | 1 (1%)            | 0                           | 0                                  |
| Sciatica                                | 0                 | 0                           | 1 (<1%)                            |
| Syncope                                 | 1 (1%)            | 0                           | 0                                  |
| <b>Gastrointestinal disorders</b>       |                   |                             |                                    |
| Any event                               | 1 (1%)            | 8 (5%)                      | 5 (4%)                             |
| Nausea                                  | 1 (1%)            | 2 (1%)                      | 1 (<1%)                            |
| Vomiting                                | 0                 | 2 (1%)                      | 1 (<1%)                            |
| Diarrhoea                               | 0                 | 1 (<1%)                     | 1 (<1%)                            |
| Dyspepsia                               | 0                 | 1 (<1%)                     | 1 (<1%)                            |
| Abdominal discomfort                    | 1 (1%)            | 0                           | 0                                  |
| Constipation                            | 0                 | 1 (<1%)                     | 0                                  |
| Dry mouth                               | 0                 | 1 (<1%)                     | 0                                  |
| Impaired gastric emptying               | 0                 | 1 (<1%)                     | 0                                  |
| Lip swelling                            | 0                 | 1 (<1%)                     | 0                                  |
| Melaena                                 | 0                 | 0                           | 1 (<1%)                            |
| Stomatitis                              | 0                 | 0                           | 1 (<1%)                            |

dln73797: /arenv/arprod/ccil8781\_gr33343/asq112989/final/drivers/ae\_t001\_on.sas 27JUL2010 20:30

CONFIDENTIAL

ASQ112989

Protocol: ASQ112989  
 Population: Modified Intent-to-treat

Page 3 of 5

Table 4.03  
 Summary of On-Treatment Adverse Events

| System Organ Class Preferred Term                    | Placebo (N=75) | SAL 50mcg BID (N=151) | FSC 250/50mcg BID (N=139) |
|------------------------------------------------------|----------------|-----------------------|---------------------------|
| Toothache                                            | 0              | 1 (<1%)               | 0                         |
| Musculoskeletal and connective tissue disorders      |                |                       |                           |
| Any event                                            | 2 (3%)         | 6 (4%)                | 6 (4%)                    |
| Myalgia                                              | 1 (1%)         | 1 (<1%)               | 1 (<1%)                   |
| Arthralgia                                           | 0              | 0                     | 2 (1%)                    |
| Pain in extremity                                    | 0              | 0                     | 2 (1%)                    |
| Back pain                                            | 0              | 0                     | 1 (<1%)                   |
| Fibromyalgia                                         | 0              | 1 (<1%)               | 0                         |
| Joint swelling                                       | 0              | 1 (<1%)               | 0                         |
| Lower extremity mass                                 | 0              | 1 (<1%)               | 0                         |
| Muscle spasms                                        | 0              | 0                     | 1 (<1%)                   |
| Musculoskeletal chest pain                           | 0              | 1 (<1%)               | 0                         |
| Musculoskeletal pain                                 | 1 (1%)         | 0                     | 0                         |
| Osteoarthritis                                       | 0              | 1 (<1%)               | 0                         |
| General disorders and administration site conditions |                |                       |                           |
| Any event                                            | 3 (4%)         | 5 (3%)                | 1 (<1%)                   |
| Chest pain                                           | 1 (1%)         | 3 (2%)                | 0                         |
| Adverse drug reaction                                | 0              | 1 (<1%)               | 0                         |
| Fatigue                                              | 1 (1%)         | 0                     | 0                         |
| Irritability                                         | 0              | 0                     | 1 (<1%)                   |
| Oedema peripheral                                    | 1 (1%)         | 0                     | 0                         |
| Pain                                                 | 0              | 1 (<1%)               | 0                         |
| Injury, poisoning and procedural complications       |                |                       |                           |
| Any event                                            | 0              | 4 (3%)                | 3 (2%)                    |
| Hand fracture                                        | 0              | 1 (<1%)               | 1 (<1%)                   |

dln73797: /arenv/arprod/ccil8781\_gr33343/asq112989/final/drivers/ae\_t001\_on.sas 27JUL2010 20:30

299

CONFIDENTIAL

ASQ112989

Protocol: ASQ112989  
Population: Modified Intent-to-treat

Page 4 of 5

Table 4.03  
Summary of On-Treatment Adverse Events

| System Organ Class<br>Preferred Term                                   | Placebo<br>(N=75) | SAL 50mcg<br>BID<br>(N=151) | FSC<br>250/50mcg<br>BID<br>(N=139) |
|------------------------------------------------------------------------|-------------------|-----------------------------|------------------------------------|
| Ankle fracture                                                         | 0                 | 0                           | 1 (<1%)                            |
| Epicondylitis                                                          | 0                 | 1 (<1%)                     | 0                                  |
| Injury                                                                 | 0                 | 1 (<1%)                     | 0                                  |
| Joint sprain                                                           | 0                 | 1 (<1%)                     | 0                                  |
| Muscle strain                                                          | 0                 | 0                           | 1 (<1%)                            |
| Metabolism and nutrition disorders                                     |                   |                             |                                    |
| Any event                                                              | 1 (1%)            | 4 (3%)                      | 1 (<1%)                            |
| Hyperglycaemia                                                         | 1 (1%)            | 1 (<1%)                     | 0                                  |
| Hyperlipidaemia                                                        | 0                 | 2 (1%)                      | 0                                  |
| Dehydration                                                            | 0                 | 1 (<1%)                     | 0                                  |
| Diabetes mellitus inadequate control                                   | 0                 | 1 (<1%)                     | 0                                  |
| Gout                                                                   | 0                 | 0                           | 1 (<1%)                            |
| Hypokalaemia                                                           | 0                 | 1 (<1%)                     | 0                                  |
| Psychiatric disorders                                                  |                   |                             |                                    |
| Any event                                                              | 2 (3%)            | 2 (1%)                      | 1 (<1%)                            |
| Anxiety                                                                | 1 (1%)            | 2 (1%)                      | 0                                  |
| Insomnia                                                               | 1 (1%)            | 1 (<1%)                     | 0                                  |
| Depression                                                             | 0                 | 1 (<1%)                     | 0                                  |
| Nervousness                                                            | 1 (1%)            | 0                           | 0                                  |
| Suicide attempt                                                        | 0                 | 0                           | 1 (<1%)                            |
| Investigations                                                         |                   |                             |                                    |
| Any event                                                              | 1 (1%)            | 1 (<1%)                     | 1 (<1%)                            |
| Blood pressure increased                                               | 1 (1%)            | 0                           | 1 (<1%)                            |
| Heart rate increased                                                   | 0                 | 1 (<1%)                     | 0                                  |
| Neoplasms benign, malignant and<br>unspecified (incl cysts and polyps) |                   |                             |                                    |
| Any event                                                              | 0                 | 1 (<1%)                     | 1 (<1%)                            |

dln73797: /arenv/arprod/ccil8781\_gr33343/asq112989/final/drivers/ae\_t001\_on.sas 27JUL2010 20:30

CONFIDENTIAL

ASQ112989

Protocol: ASQ112989  
 Population: Modified Intent-to-treat

Page 5 of 5

Table 4.03  
 Summary of On-Treatment Adverse Events

| System Organ Class<br>Preferred Term   | Placebo<br>(N=75) | SAL 50mcg<br>BID<br>(N=151) | FSC<br>250/50mcg<br>BID<br>(N=139) |
|----------------------------------------|-------------------|-----------------------------|------------------------------------|
| Lung neoplasm malignant                | 0                 | 0                           | 1 (<1%)                            |
| Seborrheic keratosis                   | 0                 | 1 (<1%)                     | 0                                  |
| Skin and subcutaneous tissue disorders |                   |                             |                                    |
| Any event                              | 1 (1%)            | 0                           | 1 (<1%)                            |
| Periorbital oedema                     | 1 (1%)            | 0                           | 0                                  |
| Skin lesion                            | 0                 | 0                           | 1 (<1%)                            |
| Blood and lymphatic system disorders   |                   |                             |                                    |
| Any event                              | 1 (1%)            | 0                           | 0                                  |
| Leukocytosis                           | 1 (1%)            | 0                           | 0                                  |
| Cardiac disorders                      |                   |                             |                                    |
| Any event                              | 0                 | 0                           | 1 (<1%)                            |
| Myocardial infarction                  | 0                 | 0                           | 1 (<1%)                            |
| Ear and labyrinth disorders            |                   |                             |                                    |
| Any event                              | 0                 | 0                           | 1 (<1%)                            |
| Ear pain                               | 0                 | 0                           | 1 (<1%)                            |
| Eye disorders                          |                   |                             |                                    |
| Any event                              | 0                 | 0                           | 1 (<1%)                            |
| Vision blurred                         | 0                 | 0                           | 1 (<1%)                            |
| Immune system disorders                |                   |                             |                                    |
| Any event                              | 0                 | 0                           | 1 (<1%)                            |
| Multiple allergies                     | 0                 | 0                           | 1 (<1%)                            |
| Vascular disorders                     |                   |                             |                                    |
| Any event                              | 0                 | 0                           | 1 (<1%)                            |
| Hypertension                           | 0                 | 0                           | 1 (<1%)                            |

dln73797: /arenv/arprod/ccil8781\_gr33343/asq112989/final/drivers/ae\_t001\_on.sas 27JUL2010 20:30

301

CONFIDENTIAL

ASQ112989

Protocol: ASQ112989  
Population: Modified Intent-to-treat

Page 1 of 2

Table 4.04  
Summary of Post-Treatment Adverse Events

| System Organ Class<br>Preferred Term                 | Placebo<br>(N=75) | SAL 50mcg<br>BID<br>(N=151) | FSC<br>250/50mcg<br>BID<br>(N=139) |
|------------------------------------------------------|-------------------|-----------------------------|------------------------------------|
| ANY EVENT                                            | 4 (5%)            | 4 (3%)                      | 7 (5%)                             |
| Infections and infestations                          |                   |                             |                                    |
| Any event                                            | 2 (3%)            | 1 (<1%)                     | 1 (<1%)                            |
| Bronchitis                                           | 1 (1%)            | 1 (<1%)                     | 0                                  |
| Gastroenteritis viral                                | 1 (1%)            | 0                           | 0                                  |
| Nasopharyngitis                                      | 0                 | 0                           | 1 (<1%)                            |
| Respiratory, thoracic and mediastinal disorders      |                   |                             |                                    |
| Any event                                            | 1 (1%)            | 1 (<1%)                     | 2 (1%)                             |
| Cough                                                | 0                 | 1 (<1%)                     | 0                                  |
| Dyspnoea                                             | 0                 | 0                           | 1 (<1%)                            |
| Epistaxis                                            | 0                 | 0                           | 1 (<1%)                            |
| Productive cough                                     | 0                 | 1 (<1%)                     | 0                                  |
| Respiratory tract congestion                         | 1 (1%)            | 0                           | 0                                  |
| Gastrointestinal disorders                           |                   |                             |                                    |
| Any event                                            | 0                 | 1 (<1%)                     | 2 (1%)                             |
| Gastric ulcer                                        | 0                 | 0                           | 1 (<1%)                            |
| Gastrooesophageal reflux disease                     | 0                 | 0                           | 1 (<1%)                            |
| Toothache                                            | 0                 | 1 (<1%)                     | 0                                  |
| Musculoskeletal and connective tissue disorders      |                   |                             |                                    |
| Any event                                            | 0                 | 1 (<1%)                     | 1 (<1%)                            |
| Fibromyalgia                                         | 0                 | 0                           | 1 (<1%)                            |
| Pain in extremity                                    | 0                 | 1 (<1%)                     | 0                                  |
| General disorders and administration site conditions |                   |                             |                                    |

dln73797: /arenv/arprod/ccil8781\_gr33343/asq112989/final/drivers/ae\_t002\_post.sas 27JUL2010 20:13

CONFIDENTIAL

ASQ112989

Protocol: ASQ112989  
 Population: Modified Intent-to-treat

Page 2 of 2

Table 4.04  
 Summary of Post-Treatment Adverse Events

| System Organ Class<br>Preferred Term           | Placebo<br>(N=75) | SAL 50mcg<br>BID<br>(N=151) | FSC<br>250/50mcg<br>BID<br>(N=139) |
|------------------------------------------------|-------------------|-----------------------------|------------------------------------|
| Any event                                      | 0                 | 1 (<1%)                     | 0                                  |
| Oedema peripheral                              | 0                 | 1 (<1%)                     | 0                                  |
| Injury, poisoning and procedural complications |                   |                             |                                    |
| Any event                                      | 0                 | 0                           | 1 (<1%)                            |
| Wrist fracture                                 | 0                 | 0                           | 1 (<1%)                            |
| Nervous system disorders                       |                   |                             |                                    |
| Any event                                      | 0                 | 1 (<1%)                     | 0                                  |
| Hypoaesthesia                                  | 0                 | 1 (<1%)                     | 0                                  |
| Skin and subcutaneous tissue disorders         |                   |                             |                                    |
| Any event                                      | 1 (1%)            | 0                           | 0                                  |
| Rash                                           | 1 (1%)            | 0                           | 0                                  |
| Urticaria                                      | 1 (1%)            | 0                           | 0                                  |

303

CONFIDENTIAL

ASQ112989

dln73797: /arenv/arprod/ccil8781\_gr33343/asq112989/final/drivers/ae\_t002\_post.sas 27JUL2010 20:13

Protocol: ASQ112989  
 Population: All Subjects Enrolled

Page 1 of 1

Table 4.05  
 Summary of Serious Adverse Events for Subjects Who did not Receive Randomised Treatment

| System Organ Class<br>Preferred Term            | Total<br>(N=547) |
|-------------------------------------------------|------------------|
| -----                                           |                  |
| ANY EVENT                                       | 2 (1%)           |
| Infections and infestations                     |                  |
| Any event                                       | 1 (<1%)          |
| Pneumonia                                       | 1 (<1%)          |
| Respiratory, thoracic and mediastinal disorders |                  |
| Any event                                       | 1 (<1%)          |
| Chronic obstructive pulmonary disease           | 1 (<1%)          |

304

dln73797: /arenv/arprod/ccil8781\_gr33343/asq112989/final/drivers/ae\_t005\_snorand.sas 27JUL2010 20:11

CONFIDENTIAL

ASQ112989



1  
2  
3  
4  
5 Protocol: ASQ112989  
6 Population: Modified Intent-to-treat

Page 1 of 1

7 Table 4.06  
8 Summary of Pre-Treatment Serious Adverse Events

9  
10  
11  
12  
13  
14  
15  
16  
17 No data to report  
18  
19  
20  
21  
22  
23  
24  
25  
26  
27  
28  
29  
30  
31  
32  
33  
34  
35  
36  
37  
38  
39  
40  
41  
42  
43  
44  
45  
46  
47  
48  
49

For peer review only

305

CONFIDENTIAL

ASQ112989

dln73797: /arenv/arprod/ccil8781\_gr33343/asq112989/final/drivers/ae\_t008\_spre.sas 27JUL2010 20:08

Protocol: ASQ112989  
Population: Modified Intent-to-treat

Page 1 of 2

Table 4.07  
Summary of On-Treatment Serious Adverse Events

| System Organ Class<br>Preferred Term                 | Placebo<br>(N=75) | SAL 50mcg<br>BID<br>(N=151) | FSC<br>250/50mcg<br>BID<br>(N=139) |
|------------------------------------------------------|-------------------|-----------------------------|------------------------------------|
| ANY EVENT                                            | 4 (5%)            | 5 (3%)                      | 3 (2%)                             |
| Respiratory, thoracic and mediastinal disorders      |                   |                             |                                    |
| Any event                                            | 4 (5%)            | 4 (3%)                      | 1 (<1%)                            |
| Chronic obstructive pulmonary disease                | 4 (5%)            | 2 (1%)                      | 0                                  |
| Acute respiratory failure                            | 0                 | 1 (<1%)                     | 0                                  |
| Pneumothorax                                         | 0                 | 1 (<1%)                     | 0                                  |
| Respiratory failure                                  | 0                 | 0                           | 1 (<1%)                            |
| Cardiac disorders                                    |                   |                             |                                    |
| Any event                                            | 0                 | 0                           | 1 (<1%)                            |
| Myocardial infarction                                | 0                 | 0                           | 1 (<1%)                            |
| Gastrointestinal disorders                           |                   |                             |                                    |
| Any event                                            | 0                 | 1 (<1%)                     | 0                                  |
| Impaired gastric emptying                            | 0                 | 1 (<1%)                     | 0                                  |
| General disorders and administration site conditions |                   |                             |                                    |
| Any event                                            | 0                 | 1 (<1%)                     | 0                                  |
| Chest pain                                           | 0                 | 1 (<1%)                     | 0                                  |
| Infections and infestations                          |                   |                             |                                    |
| Any event                                            | 0                 | 1 (<1%)                     | 0                                  |
| Pneumonia                                            | 0                 | 1 (<1%)                     | 0                                  |
| Metabolism and nutrition disorders                   |                   |                             |                                    |
| Any event                                            | 0                 | 1 (<1%)                     | 0                                  |
| Dehydration                                          | 0                 | 1 (<1%)                     | 0                                  |
| Diabetes mellitus inadequate control                 | 0                 | 1 (<1%)                     | 0                                  |

dln73797: /arenv/arprod/ccil8781\_gr33343/asq112989/final/drivers/ae\_t006\_ser.sas 27JUL2010 20:10

CONFIDENTIAL

ASQ112989

Protocol: ASQ112989  
 Population: Modified Intent-to-treat

Page 2 of 2

Table 4.07  
 Summary of On-Treatment Serious Adverse Events

| System Organ Class<br>Preferred Term | Placebo<br>(N=75) | SAL 50mcg<br>BID<br>(N=151) | FSC<br>250/50mcg<br>BID<br>(N=139) |
|--------------------------------------|-------------------|-----------------------------|------------------------------------|
| Nervous system disorders             |                   |                             |                                    |
| Any event                            | 0                 | 1 (<1%)                     | 0                                  |
| Cerebrovascular accident             | 0                 | 1 (<1%)                     | 0                                  |
| Psychiatric disorders                |                   |                             |                                    |
| Any event                            | 0                 | 0                           | 1 (<1%)                            |
| Suicide attempt                      | 0                 | 0                           | 1 (<1%)                            |

307

CONFIDENTIAL

ASQ112989

dln73797: /arenv/arprod/ccil8781\_gr33343/asq112989/final/drivers/ae\_t006\_ser.sas 27JUL2010 20:10

Protocol: ASQ112989  
Population: Modified Intent-to-treat

Table 4.08  
Summary of Post-Treatment Serious Adverse Events

No data to report

For peer review only

CONFIDENTIAL

ASQ112989

dln73797: /arenv/arprod/ccil8781\_gr33343/asq112989/final/drivers/ae\_t007\_spst.sas 27JUL2010 20:08

1  
2  
3  
4  
5  
6  
7  
8  
9  
10  
11  
12  
13  
14  
15  
16  
17  
18  
19  
20  
21  
22  
23  
24  
25  
26  
27  
28  
29  
30  
31  
32  
33  
34  
35  
36  
37  
38  
39  
40  
41  
42  
43  
44  
45  
46  
47  
48  
49

308

Protocol: ASQ112989  
 Population: Modified Intent-to-treat

Page 1 of 2

Table 4.09  
 Summary of Drug-Related On-Treatment Adverse Events

| System Organ Class<br>Preferred Term                 | Placebo<br>(N=75) | SAL 50mcg<br>BID<br>(N=151) | FSC<br>250/50mcg<br>BID<br>(N=139) |
|------------------------------------------------------|-------------------|-----------------------------|------------------------------------|
| ANY EVENT                                            | 3 (4%)            | 9 (6%)                      | 4 (3%)                             |
| Respiratory, thoracic and mediastinal disorders      |                   |                             |                                    |
| Any event                                            | 3 (4%)            | 5 (3%)                      | 1 (<1%)                            |
| Dyspnoea                                             | 1 (1%)            | 4 (3%)                      | 0                                  |
| Chronic obstructive pulmonary disease                | 2 (3%)            | 0                           | 0                                  |
| Cough                                                | 0                 | 1 (<1%)                     | 0                                  |
| Dysphonia                                            | 0                 | 0                           | 1 (<1%)                            |
| Respiratory tract congestion                         | 0                 | 1 (<1%)                     | 0                                  |
| Gastrointestinal disorders                           |                   |                             |                                    |
| Any event                                            | 0                 | 3 (2%)                      | 0                                  |
| Dry mouth                                            | 0                 | 1 (<1%)                     | 0                                  |
| Lip swelling                                         | 0                 | 1 (<1%)                     | 0                                  |
| Toothache                                            | 0                 | 1 (<1%)                     | 0                                  |
| General disorders and administration site conditions |                   |                             |                                    |
| Any event                                            | 0                 | 1 (<1%)                     | 1 (<1%)                            |
| Chest pain                                           | 0                 | 1 (<1%)                     | 0                                  |
| Irritability                                         | 0                 | 0                           | 1 (<1%)                            |
| Infections and infestations                          |                   |                             |                                    |
| Any event                                            | 0                 | 0                           | 2 (1%)                             |
| Candidiasis                                          | 0                 | 0                           | 2 (1%)                             |
| Nervous system disorders                             |                   |                             |                                    |
| Any event                                            | 0                 | 2 (1%)                      | 0                                  |
| Cerebrovascular accident                             | 0                 | 1 (<1%)                     | 0                                  |
| Headache                                             | 0                 | 1 (<1%)                     | 0                                  |

dln73797: /arenv/arprod/ccil8781\_gr33343/asq112989/final/drivers/ae\_t003\_rel.sas 27JUL2010 20:08

309

CONFIDENTIAL

ASQ112989

Protocol: ASQ112989  
Population: Modified Intent-to-treat

Table 4.09  
Summary of Drug-Related On-Treatment Adverse Events

| System Organ Class<br>Preferred Term | Placebo<br>(N=75) | SAL 50mcg<br>BID<br>(N=151) | FSC<br>250/50mcg<br>BID<br>(N=139) |
|--------------------------------------|-------------------|-----------------------------|------------------------------------|
| Investigations                       |                   |                             |                                    |
| Any event                            | 0                 | 1 (<1%)                     | 0                                  |
| Heart rate increased                 | 0                 | 1 (<1%)                     | 0                                  |

310

For peer review only

CONFIDENTIAL

ASQ112989

dln73797: /arenv/arprod/ccil8781\_gr33343/asq112989/final/drivers/ae\_t003\_rel.sas 27JUL2010 20:08

Protocol: ASQ112989  
 Population: Modified Intent-to-treat

Page 1 of 2

Table 4.10  
 Summary of On-Treatment Adverse Events Leading to Permanent Discontinuation of Investigational Product and/or Withdrawal from Study

| System Organ Class Preferred Term                                   | Placebo (N=75) | SAL 50mcg BID (N=151) | FSC 250/50mcg BID (N=139) |
|---------------------------------------------------------------------|----------------|-----------------------|---------------------------|
| ANY EVENT                                                           | 3 (4%)         | 3 (2%)                | 7 (5%)                    |
| Respiratory, thoracic and mediastinal disorders                     |                |                       |                           |
| Any event                                                           | 2 (3%)         | 2 (1%)                | 2 (1%)                    |
| Dyspnoea                                                            | 0              | 2 (1%)                | 1 (<1%)                   |
| Chronic obstructive pulmonary disease                               | 2 (3%)         | 0                     | 0                         |
| Respiratory failure                                                 | 0              | 0                     | 1 (<1%)                   |
| Respiratory tract congestion                                        | 0              | 1 (<1%)               | 0                         |
| Infections and infestations                                         |                |                       |                           |
| Any event                                                           | 1 (1%)         | 0                     | 3 (2%)                    |
| Acute sinusitis                                                     | 0              | 0                     | 1 (<1%)                   |
| Candidiasis                                                         | 0              | 0                     | 1 (<1%)                   |
| Pharyngitis                                                         | 0              | 0                     | 1 (<1%)                   |
| Respiratory tract infection                                         | 1 (1%)         | 0                     | 0                         |
| Gastrointestinal disorders                                          |                |                       |                           |
| Any event                                                           | 0              | 1 (<1%)               | 0                         |
| Lip swelling                                                        | 0              | 1 (<1%)               | 0                         |
| General disorders and administration site conditions                |                |                       |                           |
| Any event                                                           | 0              | 0                     | 1 (<1%)                   |
| Irritability                                                        | 0              | 0                     | 1 (<1%)                   |
| Neoplasms benign, malignant and unspecified (incl cysts and polyps) |                |                       |                           |
| Any event                                                           | 0              | 0                     | 1 (<1%)                   |
| Lung neoplasm malignant                                             | 0              | 0                     | 1 (<1%)                   |

dln73797: /arenv/arprod/ccil8781\_gr33343/asq112989/final/drivers/ae\_t004\_wd.sas 27JUL2010 20:08

311

CONFIDENTIAL

ASQ112989

Protocol: ASQ112989  
Population: Modified Intent-to-treat

Table 4.10  
Summary of On-Treatment Adverse Events Leading to Permanent Discontinuation of Investigational Product and/or Withdrawal from Study

| System Organ Class<br>Preferred Term | Placebo<br>(N=75) | SAL 50mcg<br>BID<br>(N=151) | FSC<br>250/50mcg<br>BID<br>(N=139) |
|--------------------------------------|-------------------|-----------------------------|------------------------------------|
| Psychiatric disorders                |                   |                             |                                    |
| Any event                            | 0                 | 0                           | 1 (<1%)                            |
| Suicide attempt                      | 0                 | 0                           | 1 (<1%)                            |

312

CONFIDENTIAL

ASQ112989

dln73797: /arenv/arprod/ccil8781\_gr33343/asq112989/final/drivers/ae\_t004\_wd.sas 27JUL2010 20:08



Protocol: ASQ112989  
 Population: Modified Intent-to-treat

Page 1 of 3

Table 4.11  
 Summary of Vital Signs

|                  | Treatment         | N   | Visit                               | n   | Mean | SD    | Median | Min. | Max. |
|------------------|-------------------|-----|-------------------------------------|-----|------|-------|--------|------|------|
| Heart rate (bpm) | Placebo           | 75  | Screening                           | 75  | 76.5 | 13.92 | 75.0   | 54   | 115  |
|                  |                   |     | Visit 3/PD                          | 73  | 76.1 | 13.83 | 76.0   | 54   | 142  |
|                  |                   |     | Change from Screening to Visit 3/PD | 73  | -0.4 | 11.61 | 0.0    | -40  | 32   |
|                  | SAL 50mcg BID     | 151 | Screening                           | 151 | 76.7 | 12.10 | 76.0   | 44   | 118  |
|                  |                   |     | Visit 3/PD                          | 149 | 76.4 | 11.04 | 76.0   | 44   | 106  |
|                  |                   |     | Change from Screening to Visit 3/PD | 149 | -0.1 | 9.48  | 0.0    | -26  | 29   |
|                  | FSC 250/50mcg BID | 139 | Screening                           | 139 | 76.1 | 12.54 | 76.0   | 47   | 114  |
|                  |                   |     | Visit 3/PD                          | 136 | 77.4 | 13.15 | 76.5   | 50   | 109  |
|                  |                   |     | Change from Screening to Visit 3/PD | 136 | 1.3  | 9.84  | 0.0    | -23  | 32   |

Note: PD = Premature Discontinuation  
 dln73797: /arenv/arprod/ccil8781\_gr33343/asq112989/final/drivers/vs\_t001\_summ.sas 27JUL2010 20:08

313

CONFIDENTIAL

ASQ112989

Protocol: ASQ112989  
Population: Modified Intent-to-treat

Table 4.11  
Summary of Vital Signs

|                    | Treatment         | N   | Visit                               | n   | Mean  | SD    | Median | Min. | Max. |
|--------------------|-------------------|-----|-------------------------------------|-----|-------|-------|--------|------|------|
| Systolic BP (mmHg) | Placebo           | 75  | Screening                           | 75  | 130.5 | 17.11 | 130.0  | 94   | 176  |
|                    |                   |     | Visit 3/PD                          | 73  | 127.4 | 15.61 | 125.0  | 93   | 162  |
|                    |                   |     | Change from Screening to Visit 3/PD | 73  | -3.3  | 17.24 | -3.0   | -65  | 41   |
|                    | SAL 50mcg BID     | 151 | Screening                           | 151 | 131.5 | 17.58 | 130.0  | 95   | 188  |
|                    |                   |     | Visit 3/PD                          | 149 | 129.3 | 17.04 | 130.0  | 84   | 186  |
|                    |                   |     | Change from Screening to Visit 3/PD | 149 | -2.4  | 16.16 | -1.0   | -75  | 49   |
|                    | FSC 250/50mcg BID | 139 | Screening                           | 139 | 130.3 | 16.27 | 131.0  | 96   | 185  |
|                    |                   |     | Visit 3/PD                          | 136 | 127.0 | 17.51 | 126.0  | 76   | 178  |
|                    |                   |     | Change from Screening to Visit 3/PD | 136 | -3.4  | 16.93 | -2.0   | -63  | 42   |

314

Note: PD = Premature Discontinuation  
dln73797: /arenv/arprod/ccil8781\_gr33343/asq112989/final/drivers/vs\_t001\_summ.sas 27JUL2010 20:08

CONFIDENTIAL

ASQ112989

Protocol: ASQ112989  
 Population: Modified Intent-to-treat

Page 3 of 3

Table 4.11  
 Summary of Vital Signs

| Treatment                   | N   | Visit                               | n   | Mean | SD    | Median | Min. | Max. |
|-----------------------------|-----|-------------------------------------|-----|------|-------|--------|------|------|
| Diastolic BP (mmHg) Placebo | 75  | Screening                           | 75  | 77.3 | 9.35  | 76.0   | 56   | 97   |
|                             |     | Visit 3/PD                          | 73  | 76.5 | 10.18 | 78.0   | 52   | 100  |
|                             |     | Change from Screening to Visit 3/PD | 73  | -0.7 | 9.20  | 0.0    | -26  | 17   |
| SAL 50mcg BID               | 151 | Screening                           | 151 | 78.4 | 11.50 | 78.0   | 50   | 115  |
|                             |     | Visit 3/PD                          | 149 | 77.4 | 9.21  | 79.0   | 54   | 99   |
|                             |     | Change from Screening to Visit 3/PD | 149 | -1.0 | 9.21  | -1.0   | -42  | 34   |
| FSC 250/50mcg BID           | 139 | Screening                           | 139 | 77.9 | 8.82  | 79.0   | 58   | 100  |
|                             |     | Visit 3/PD                          | 136 | 76.6 | 10.58 | 78.0   | 49   | 103  |
|                             |     | Change from Screening to Visit 3/PD | 136 | -1.4 | 8.76  | -1.0   | -24  | 32   |

Note: PD = Premature Discontinuation

dln73797: /arenv/arprod/ccil8781\_gr33343/asq112989/final/drivers/vs\_t001\_summ.sas 27JUL2010 20:08

315

CONFIDENTIAL

ASQ112989

Protocol: ASQ112989  
Population: All Subjects Enrolled

Table 4.12  
Summary of ECG Findings at Screening

|                                      | Total<br>(N=547) |
|--------------------------------------|------------------|
| n                                    | 417              |
| Normal                               | 182 (44%)        |
| Abnormal, not clinically significant | 235 (56%)        |
| Abnormal, clinically significant     | 0                |

For peer review only

316

CONFIDENTIAL

ASQ112989

tlc19199: /arenv/arprod/ccil8781\_gr33343/asq112989/final/drivers/eg\_t001\_summ.sas 20AUG2010 14:29

Protocol: ASQ112989  
 Population: Modified Intent-to-treat

Page 1 of 1

Table 4.13  
 Summary of On-Treatment COPD Exacerbations

|                                           |                 | Placebo<br>(N=75) | SAL 50mcg<br>BID<br>(N=151) | FSC<br>250/50mcg<br>BID<br>(N=139) | Total<br>(N=365) |
|-------------------------------------------|-----------------|-------------------|-----------------------------|------------------------------------|------------------|
| Number of COPD exacerbations              | n               | 75                | 151                         | 139                                | 365              |
|                                           | 0               | 69 (92%)          | 136 (90%)                   | 135 (97%)                          | 340 (93%)        |
|                                           | 1               | 5 (7%)            | 15 (10%)                    | 4 (3%)                             | 24 (7%)          |
|                                           | >1              | 1 (1%)            | 0                           | 0                                  | 1 (<1%)          |
| Withdrawn due to any exacerbation         |                 | 1 (17%)           | 0                           | 1 (25%)                            | 2 (8%)           |
| Took corticosteroids for any exacerbation |                 | 6 (100%)          | 13 (87%)                    | 2 (50%)                            | 21 (84%)         |
| Took antibiotics for any exacerbation     |                 | 6 (100%)          | 11 (73%)                    | 3 (75%)                            | 20 (80%)         |
| Hospitalized due to any exacerbation      |                 | 4 (67%)           | 4 (27%)                     | 0                                  | 8 (32%)          |
| Worst severity of exacerbation            | n               | 6                 | 15                          | 4                                  | 25               |
|                                           | Moderate        | 2 (33%)           | 12 (80%)                    | 3 (75%)                            | 17 (68%)         |
|                                           | Severe          | 4 (67%)           | 2 (13%)                     | 1 (25%)                            | 7 (28%)          |
|                                           | Moderate/Severe | 0                 | 1 (7%)                      | 0                                  | 1 (4%)           |
| Worst outcome of exacerbation             | n               | 6                 | 15                          | 4                                  | 25               |
|                                           | Resolved        | 6 (100%)          | 12 (80%)                    | 3 (75%)                            | 21 (84%)         |
|                                           | Fatal           | 0                 | 0                           | 0                                  | 0                |
|                                           | Not resolved    | 0                 | 3 (20%)                     | 1 (25%)                            | 4 (16%)          |

317

dln73797: /arenv/arprod/ccil18781\_gr33343/asq112989/final/drivers/exac\_t001\_summ.sas 27JUL2010 20:08

Protocol: ASQ112989  
Population: Run-in

Page 1 of 1

Table 5.01  
Summary of Healthcare Provider Contacts

|                                                              | Run-in<br>failure<br>(N=52) | Placebo<br>(N=75) | SAL 50mcg<br>BID<br>(N=152) | FSC<br>250/50mcg<br>BID<br>(N=139) | Total<br>(N=418) |
|--------------------------------------------------------------|-----------------------------|-------------------|-----------------------------|------------------------------------|------------------|
| Contact with healthcare provider on any day during run-in    | 16 (35%)                    | 18 (24%)          | 46 (30%)                    | 43 (31%)                           | 123 (30%)        |
| Type of contact during run-in:                               |                             |                   |                             |                                    |                  |
| n                                                            | 16                          | 18                | 46                          | 43                                 | 123              |
| Talked on phone with a doctor or nurse                       | 1 (6%)                      | 1 (6%)            | 9 (20%)                     | 7 (16%)                            | 18 (15%)         |
| Clinic visit for regular checkup                             | 8 (50%)                     | 15 (83%)          | 32 (70%)                    | 32 (74%)                           | 87 (71%)         |
| Clinic visit for change in symptoms or treatment             | 6 (38%)                     | 2 (11%)           | 7 (15%)                     | 6 (14%)                            | 21 (17%)         |
| Went to emergency room or urgent care center                 | 1 (6%)                      | 0                 | 2 (4%)                      | 1 (2%)                             | 4 (3%)           |
| Admitted to hospital                                         | 1 (6%)                      | 0                 | 0                           | 0                                  | 1 (<1%)          |
| Contact with healthcare provider on any day during treatment | 0                           | 20 (27%)          | 47 (31%)                    | 33 (24%)                           | 100 (27%)        |
| Type of contact during treatment                             |                             |                   |                             |                                    |                  |
| n                                                            |                             | 20                | 47                          | 33                                 | 100              |
| Talked on phone with a doctor or nurse                       |                             | 3 (15%)           | 4 (9%)                      | 4 (12%)                            | 11 (11%)         |
| Clinic visit for regular checkup                             |                             | 13 (65%)          | 29 (62%)                    | 21 (64%)                           | 63 (63%)         |
| Clinic visit for change in symptoms or treatment             |                             | 7 (35%)           | 14 (30%)                    | 12 (36%)                           | 33 (33%)         |
| Went to emergency room or urgent care center                 |                             | 1 (5%)            | 3 (6%)                      | 0                                  | 4 (4%)           |
| Admitted to hospital                                         |                             | 3 (15%)           | 2 (4%)                      | 0                                  | 5 (5%)           |

Note: Subjects can record more than one type of contact during each period.

tlc19199: /arenv/arprod/ccil8781\_gr33343/asq112989/final/drivers/hc\_t001.sas 18AUG2010 01:43

CONFIDENTIAL

ASQ112989

Protocol: ASQ112989  
 Population: Run-in

Page 1 of 2

Table 5.02  
 Summary of Unscheduled Healthcare Utilisation During the Run-in

|                                        | Total<br>(N=418) |
|----------------------------------------|------------------|
| -----                                  |                  |
| Unscheduled healthcare utilisation     |                  |
| n                                      | 418              |
| Yes                                    | 25 (6%)          |
| No                                     | 393 (94%)        |
| Total number of telephone calls        |                  |
| 0                                      | 414 (>99%)       |
| 1                                      | 4 (<1%)          |
| 2                                      | 0                |
| >2                                     | 0                |
| Total number of home/day visits        |                  |
| 0                                      | 418 (100%)       |
| 1                                      | 0                |
| 2                                      | 0                |
| >2                                     | 0                |
| Total number of home/night visits      |                  |
| 0                                      | 418 (100%)       |
| 1                                      | 0                |
| 2                                      | 0                |
| >2                                     | 0                |
| Total number of office/practice visits |                  |
| 0                                      | 396 (95%)        |
| 1                                      | 20 (5%)          |
| 2                                      | 2 (<1%)          |
| >2                                     | 0                |

Note: Daily healthcare utilisation is recorded by the subject on the eDiary and unscheduled healthcare utilisation is recorded by the site on a worksheet. The data do not always match.  
 akv11639: /arenv/arprod/ccil18781\_gr33343/asq112989/final/drivers/hc\_t003.sas 23AUG2010 20:39

319

CONFIDENTIAL

ASQ112989

Protocol: ASQ112989  
Population: Run-in

Table 5.02  
Summary of Unscheduled Healthcare Utilisation During the Run-in

|                                               | Total<br>(N=418) |
|-----------------------------------------------|------------------|
| -----                                         |                  |
| Total number of urgent care/outpatient visits |                  |
| 0                                             | 418 (100%)       |
| 1                                             | 0                |
| 2                                             | 0                |
| >2                                            | 0                |
| Total number of emergency room visits         |                  |
| 0                                             | 414 (>99%)       |
| 1                                             | 3 (<1%)          |
| 2                                             | 0                |
| >2                                            | 1 (<1%)          |
| Total number of days spent in intensive care  |                  |
| 0                                             | 418 (100%)       |
| 1                                             | 0                |
| 2                                             | 0                |
| >2                                            | 0                |
| Total number of days spent in a general ward  |                  |
| 0                                             | 418 (100%)       |
| 1                                             | 0                |
| 2                                             | 0                |
| >2                                            | 0                |
| Total length of contact (days)                |                  |
| 0-3                                           | 414 (>99%)       |
| >3-7                                          | 1 (<1%)          |
| >7-14                                         | 3 (<1%)          |
| >14                                           | 0                |

Note: Daily healthcare utilisation is recorded by the subject on the eDiary and unscheduled healthcare utilisation is recorded by the site on a worksheet. The data do not always match.

akv11639: /arenv/arprod/ccil8781\_gr33343/asq112989/final/drivers/hc\_t003.sas 23AUG2010 20:39

320

CONFIDENTIAL

ASQ112989



Protocol: ASQ112989  
 Population: Modified Intent-to-treat

Page 1 of 3

Table 5.03  
 Summary of Unscheduled Healthcare Utilisation During Treatment

|                                    | Placebo<br>(N=75) | SAL 50mcg<br>BID<br>(N=151) | FSC<br>250/50mcg<br>BID<br>(N=139) | Total<br>(N=365) |
|------------------------------------|-------------------|-----------------------------|------------------------------------|------------------|
| -----                              |                   |                             |                                    |                  |
| Unscheduled healthcare utilisation |                   |                             |                                    |                  |
| n                                  | 75                | 151                         | 139                                | 365              |
| Yes                                | 11 (15%)          | 19 (13%)                    | 17 (12%)                           | 47 (13%)         |
| No                                 | 64 (85%)          | 132 (87%)                   | 122 (88%)                          | 318 (87%)        |
| Total number of telephone calls    |                   |                             |                                    |                  |
| 0                                  | 70 (93%)          | 147 (97%)                   | 135 (97%)                          | 352 (96%)        |
| 1                                  | 3 (4%)            | 3 (2%)                      | 3 (2%)                             | 9 (2%)           |
| 2                                  | 1 (1%)            | 0                           | 1 (<1%)                            | 2 (<1%)          |
| >2                                 | 1 (1%)            | 1 (<1%)                     | 0                                  | 2 (<1%)          |
| Total number of home/day visits    |                   |                             |                                    |                  |
| 0                                  | 75 (100%)         | 151 (100%)                  | 139 (100%)                         | 365 (100%)       |
| 1                                  | 0                 | 0                           | 0                                  | 0                |
| 2                                  | 0                 | 0                           | 0                                  | 0                |
| >2                                 | 0                 | 0                           | 0                                  | 0                |
| Total number of home/night visits  |                   |                             |                                    |                  |
| 0                                  | 75 (100%)         | 151 (100%)                  | 139 (100%)                         | 365 (100%)       |
| 1                                  | 0                 | 0                           | 0                                  | 0                |
| 2                                  | 0                 | 0                           | 0                                  | 0                |
| >2                                 | 0                 | 0                           | 0                                  | 0                |

Note: Daily healthcare utilisation is recorded by the subject on the eDiary and unscheduled healthcare utilisation is recorded by the site on a worksheet. The data do not always match.  
 akv11639: /arenv/arprod/ccil18781\_gr33343/asq112989/final/drivers/hc\_t004.sas 23AUG2010 20:39

321

For Peer Review Only

Protocol: ASQ112989  
Population: Modified Intent-to-treat

Table 5.03  
Summary of Unscheduled Healthcare Utilisation During Treatment

|                                               | Placebo<br>(N=75) | SAL 50mcg<br>BID<br>(N=151) | FSC<br>250/50mcg<br>BID<br>(N=139) | Total<br>(N=365) |
|-----------------------------------------------|-------------------|-----------------------------|------------------------------------|------------------|
| -----                                         |                   |                             |                                    |                  |
| Total number of office/practice visits        |                   |                             |                                    |                  |
| 0                                             | 67 (89%)          | 135 (89%)                   | 127 (91%)                          | 329 (90%)        |
| 1                                             | 5 (7%)            | 14 (9%)                     | 8 (6%)                             | 27 (7%)          |
| 2                                             | 1 (1%)            | 2 (1%)                      | 3 (2%)                             | 6 (2%)           |
| >2                                            | 2 (3%)            | 0                           | 1 (<1%)                            | 3 (<1%)          |
| Total number of urgent care/outpatient visits |                   |                             |                                    |                  |
| 0                                             | 74 (99%)          | 151 (100%)                  | 136 (98%)                          | 361 (99%)        |
| 1                                             | 1 (1%)            | 0                           | 3 (2%)                             | 4 (1%)           |
| 2                                             | 0                 | 0                           | 0                                  | 0                |
| >2                                            | 0                 | 0                           | 0                                  | 0                |
| Total number of emergency room visits         |                   |                             |                                    |                  |
| 0                                             | 71 (95%)          | 145 (96%)                   | 137 (99%)                          | 353 (97%)        |
| 1                                             | 4 (5%)            | 6 (4%)                      | 2 (1%)                             | 12 (3%)          |
| 2                                             | 0                 | 0                           | 0                                  | 0                |
| >2                                            | 0                 | 0                           | 0                                  | 0                |
| Total number of days spent in intensive care  |                   |                             |                                    |                  |
| 0                                             | 75 (100%)         | 150 (>99%)                  | 139 (100%)                         | 364 (>99%)       |
| 1                                             | 0                 | 1 (<1%)                     | 0                                  | 1 (<1%)          |
| 2                                             | 0                 | 0                           | 0                                  | 0                |
| >2                                            | 0                 | 0                           | 0                                  | 0                |

Note: Daily healthcare utilisation is recorded by the subject on the eDiary and unscheduled healthcare utilisation is recorded by the site on a worksheet. The data do not always match.  
akv11639: /arenv/arprod/ccil18781\_gr33343/asq112989/final/drivers/hc\_t004.sas 23AUG2010 20:39

CONFIDENTIAL

ASQ112989

1  
2  
3  
4  
5  
6  
7  
8  
9  
10  
11  
12  
13  
14  
15  
16  
17  
18  
19  
20  
21  
22  
23  
24  
25  
26  
27  
28  
29  
30  
31  
32  
33  
34  
35  
36  
37  
38  
39  
40  
41  
42  
43  
44  
45  
46  
47  
48  
49

322

Protocol: ASQ112989  
 Population: Modified Intent-to-treat

Page 3 of 3

Table 5.03  
 Summary of Unscheduled Healthcare Utilisation During Treatment

|                                              | Placebo<br>(N=75) | SAL 50mcg<br>BID<br>(N=151) | FSC<br>250/50mcg<br>BID<br>(N=139) | Total<br>(N=365) |
|----------------------------------------------|-------------------|-----------------------------|------------------------------------|------------------|
| -----                                        |                   |                             |                                    |                  |
| Total number of days spent in a general ward |                   |                             |                                    |                  |
| 0                                            | 72 (96%)          | 146 (97%)                   | 138 (>99%)                         | 356 (98%)        |
| 1                                            | 1 (1%)            | 0                           | 0                                  | 1 (<1%)          |
| 2                                            | 0                 | 0                           | 0                                  | 0                |
| >2                                           | 2 (3%)            | 5 (3%)                      | 1 (<1%)                            | 8 (2%)           |
| Total length of contact (days)               |                   |                             |                                    |                  |
| 0-3                                          | 72 (96%)          | 145 (96%)                   | 135 (97%)                          | 352 (96%)        |
| >3-7                                         | 1 (1%)            | 4 (3%)                      | 1 (<1%)                            | 6 (2%)           |
| >7-14                                        | 1 (1%)            | 1 (<1%)                     | 2 (1%)                             | 4 (1%)           |
| >14                                          | 1 (1%)            | 1 (<1%)                     | 1 (<1%)                            | 3 (<1%)          |

Note: Daily healthcare utilisation is recorded by the subject on the eDiary and unscheduled healthcare utilisation is recorded by the site on a worksheet. The data do not always match.  
 akv11639: /arenv/arprod/ccil8781\_gr33343/asq112989/final/drivers/hc\_t004.sas 23AUG2010 20:39

323

For peer review only

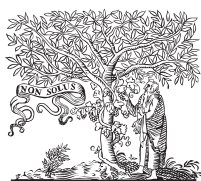

ELSEVIER

Available online at [www.sciencedirect.com](http://www.sciencedirect.com)

SciVerse ScienceDirect

journal homepage: [www.elsevier.com/locate/jval](http://www.elsevier.com/locate/jval)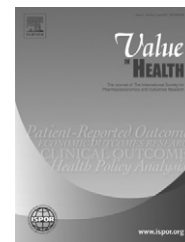

## Development of the Shortness of Breath with Daily Activities Questionnaire (SOBDA)

Kellee Howard, MS, MA<sup>1</sup>, Pamela Berry, MSc<sup>2</sup>, Jennifer Petrillo, PhD<sup>3</sup>, Ingela Wiklund, PhD<sup>4</sup>, Laurie Roberts, MPH<sup>1</sup>, Michael Watkins, PharmD<sup>5</sup>, Courtney Crim, MD<sup>5</sup>, Teresa Wilcox, PhD<sup>1,\*</sup>

<sup>1</sup>United BioSource Corporation, Bethesda, MD, USA; <sup>2</sup>GlaxoSmithKline, Middlesex, UK; <sup>3</sup>Novartis Pharmaceuticals Corporation, Easton Hanover, NJ, USA; <sup>4</sup>Center for Health Outcomes Research, United BioSource Corporation, London, UK; <sup>5</sup>GlaxoSmithKline, Durham, NC, USA

### ABSTRACT

**Objectives:** Based on qualitative research of patients with chronic obstructive pulmonary disease (COPD), the Shortness of Breath (SOB) with Daily Activities (SOBDA) questionnaire was developed as a patient-reported outcome instrument to evaluate the impact of therapy on SOB and assess how SOB affects daily activities. **Methods:** Development of the SOBDA questionnaire consisted of three components. First, focus groups of patients with COPD were asked to describe their experiences of SOB with daily activities. A pool of items was drafted on the basis of information from the focus groups and literature reviews, and then discussed among instrument development and clinical experts. Cognitive debriefing interviews of patients were conducted to assess the draft item pool, and their feedback was used to develop newer versions of the questionnaire. Input was also sought from the Food and Drug Administration, patients, and clinicians. **Results:** Forty patients participated in seven focus groups. The terms most often used to describe SOB were “short of breath” or

“difficulty breathing.” Patients were clearly able to distinguish SOB from chest congestion and wheezing, other common symptoms associated with COPD. The resulting item pool contained 37 items to assess SOB associated with everyday activities, and concept saturation was reached. Thirty-seven patients participated in the subsequent cognitive debriefing interviews. Patients found the items clear and easy to understand with relevance to their everyday experiences, and easy to use in an electronic format. **Conclusions:** Instructions and response options to the SOBDA questionnaire were well understood by patients with COPD, and item relevance was confirmed. Prospective validation and item reduction studies are highly anticipated. **Keywords:** COPD, patient-reported outcomes, qualitative research, quality of life.

Copyright © 2012, International Society for Pharmacoeconomics and Outcomes Research (ISPOR). Published by Elsevier Inc.

### Introduction

Chronic obstructive pulmonary disease (COPD) is a preventable and treatable disease characterized by progressive airflow limitation that is not fully reversible [1]. It is associated with an abnormal inflammatory response in the lung to noxious particles or gases.

The principal marker for the physiologic changes in airflow limitation, which is characteristic of the disease, is lung function, measured as forced expiratory volume in 1 second (FEV1). This marker correlates poorly with the severity of dyspnea (usually described by patients as shortness of breath [SOB]) and other symptoms of COPD [1,2]. Therefore, changes in FEV1 may not always reflect symptomatic changes that are clinically meaningful for patients. A variety of biologic, physiologic, and symptomatic markers are currently being explored as alternative methods for assessing disease severity, response to therapy, and disease progression [3–5].

Dyspnea is one of the most common and disabling symptoms in COPD [3,6,7]. It is frequently associated with decreases in

functional status, physical activity, and quality of life [8–10]. The therapeutic goals for patients with COPD include relief from symptoms such as dyspnea, improving health status, preventing and treating exacerbations, slowing the progression of disease, and reducing mortality [1,11]. Licensed indications for most current COPD treatments are limited to improving airflow obstruction, and yet no US Food and Drug Administration (FDA)-approved pharmacologic therapy currently has information on dyspnea in its US label. As dyspnea is so important to the lives of patients with COPD and it affects many of their daily activities, the relationship between the two is important to properly evaluate.

The relationship between physical activity and breathlessness in COPD is complex, and various models have been developed to help facilitate an understanding of this association. Jolley and Moxham [9] described a physiologic model of patient-reported breathlessness based on the relationship between ventilatory load, respiratory muscle capacity, neural respiratory drive, and neuromechanical dissociation during daily activities. Conversely,

Conflicts of interest: This work was supported by GlaxoSmithKline. MW, PB, and CC are employees of GlaxoSmithKline; KH, TW, IW, and LR are employees of the United BioSource Corporation who were paid for services by GlaxoSmithKline in connection with the development of this manuscript; JP is a former employee of the United BioSource Corporation.

\* Address correspondence to: Teresa K Wilcox, United BioSource Corporation, 7101 Wisconsin Avenue, Suite 600, Bethesda, MD 20814, USA

E-mail: [teresa.wilcox@unitedbiosource.com](mailto:teresa.wilcox@unitedbiosource.com).

1098-3015 – see front matter Copyright © 2012, International Society for Pharmacoeconomics and Outcomes Research (ISPOR).

Published by Elsevier Inc.

<http://dx.doi.org/10.1016/j.jval.2012.06.018>

Victorson et al. [12] developed a conceptual model to inform patient-reported outcome (PRO) instrument development using patient descriptions of dyspnea and functional limitations in COPD. On the basis of qualitative research, Victorson's group concluded that five primary components make up the patient's experience of dyspnea: breathlessness, fatigue, activity modification, activity limitation, and emotional response. Their model describes how dyspnea symptoms impair function and are mediated by personal and environmental factors. Both the physiologic and conceptual models provided a structure on which to base Shortness of Breath with Daily Activities (SOBDA) questionnaire development for measuring the severity of breathlessness during daily activities. With the understanding gained from these models, we attempted to assess qualitative outcomes in COPD relating to dyspnea.

Qualitative studies are increasingly recognized to be as important to our understanding of the patient experience of dyspnea as studies focusing on other physical aspects of COPD. The results of such studies explain, at least in part, why two people with the same physiologic markers of COPD severity often experience and describe different levels of dyspnea. To develop an instrument that accurately captures how patients perceive dyspnea, a patient-centered approach using their words to describe symptoms is necessary. Such an instrument needs to be valid, reliable, and responsive to change, meeting the criteria outlined in the FDA PRO Guidance document [13], if the intent is to support a label claim for a medicinal product in the United States. No instruments for assessing COPD-related dyspnea have been qualified for the target population to achieve an indication of a medicinal product by the FDA for inclusion into product labels at the time of writing. We developed the SOBDA questionnaire to assess the impact of daily activities on dyspnea in patients with COPD. The goal of this phase of development was to construct an instrument for assessing SOB during patient-identified daily activities that is based on patient feedback on specific terminology and patient experiences with SOB.

## Methods

The process for developing the SOBDA questionnaire involved multiple steps and review processes. Focus groups of patients with COPD were conducted in clinic offices and meeting rooms in San Diego, CA, San Antonio, TX, New Brunswick, NJ, and Miami, FL, and each session lasted for approximately 1.5 to 2 hours. The moderator's discussion guide for the focus groups was developed on the basis of current relevant literature, learnings from previous models such as those developed by Jolley and Moxham [9] and Victorson et al. [12], and input from clinical experts, and was used to facilitate discussions on patients' experiences of SOB with daily activities. A pool of items was drafted on the basis of information gathered from the focus groups and literature reviews, and these items were then discussed among instrument development and pulmonary experts. In addition, four translation experts and a lexibility expert reviewed the questionnaire to ensure cross-cultural equivalence and translational feasibility, as well as clarity of wording. Cognitive debriefing interviews of patients were subsequently conducted to evaluate the draft item pool, and feedback from these interviews was used to develop newer versions of the questionnaire.

## Patients

For both the focus group discussions (phase 1) and cognitive debriefings (phase 2), efforts were made to recruit from pulmonary clinics in the United States participants with a variety of educational, sociodemographic, and ethnic backgrounds, as well as diverse disease experiences. The demography and clinical characteristics of the recruited participants were intentionally

chosen to include and expand beyond that of a typical COPD clinical trial population in order for the instrument to be able to be used in a broader trial population. Economic diversity was addressed by using zip codes as a surrogate for socioeconomic status [14]. Clinics from across the United States were instructed to enroll participants with different disease severities to achieve the following target population: 15% Global Initiative for Chronic Obstructive Lung Disease (GOLD) stage I, 35% GOLD stage II, 35% GOLD stage III, and 15% GOLD stage IV. The target number of desired participants for this study was 40; however, the total number could be modified on the basis of whether concept saturation (i.e., no new concepts or information emerging from subsequent focus groups) was reached [15–18]. Saturation was expected to be reached during focus group discussions by approximately 30 patients. If saturation was not reached, additional participants could be added. Protocols were approved by an institutional review board, and patient consent was obtained prior to the discussion of study-related materials. Clinicians completed an enrollment form, confirming each patient's eligibility and disease severity.

Inclusion criteria were as follows: 40 to 80 years of age; current or former smokers with a history of at least 10 pack-years; current diagnosis of COPD and/or chronic bronchitis as defined by the GOLD initiative [1]; willing and able to provide written informed consent; able to participate in a group discussion; and able to speak and read English.

Exclusion criteria were as follows: respiratory disorders other than COPD (e.g., asthma); organic heart disease with resultant left ventricular failure and New York Heart Association class II to IV; clinically relevant bronchiectasis; recent COPD exacerbation (within previous 60 days); neuromuscular disease; possible causes of significant dyspnea/fatigue other than COPD, including severe anemia; and concurrent medical or psychiatric condition or cognitive impairment potentially affecting participation in the study.

## Measures

Upon completion of both the focus group discussions and cognitive debriefings, all patients completed a brief sociodemographic questionnaire that provided reviewers with additional information on the patient population. In addition, patients were assessed by using the following validated measures: the modified Medical Research Council dyspnea scale [19], the St. George's Respiratory Questionnaire for COPD patients [20,21], and the Chronic Respiratory Questionnaire – Self-Administered Standardized [22–24].

## Focus Groups

Moderators used a standardized discussion guide to solicit terminology used by patients to describe the sensation of dyspnea and to explore the circumstances in which participants experienced the sensation. Patients were initially asked to “tell me about your breathing,” which prompted them to explain their experience with dyspnea and the differences in sensations of dyspnea compared with chest congestion, chest tightness, and wheezing. Patients were then asked to describe the general activities they conducted on a daily basis, as well as their level of dyspnea as they conducted these activities. Moderators probed on specific dyspnea-inducing aspects of the activities, and patients were asked to describe any body movements or positions that impact dyspnea. All discussion probes were phrased as open-ended questions, using only the terminology that patients provided. The verbatim terms that patients used to describe their dyspnea were coded for the frequency of occurrence. As each concept reached saturation, final sessions were focused on supplementing missing information relating to activities, but an open discussion of the other topics was still encouraged by the moderators.

### Item Pool Development

Based on the literature review and results of the focus groups, a pool of items was drafted and discussed among instrument development and clinical experts. The draft pool was adjusted to improve grammar and ensure cross-cultural equivalence and translational feasibility according to standard cross-cultural translation and adaptation processes [25]. Response options were based on the focus group results and modified to include feedback on all levels of dyspnea.

As the SOBDA questionnaire was intended to be completed daily using an electronic format, the items were loaded onto a LogPad personal digital assistant by PHT Corporation. Items and responses too long to fit on the screen were adjusted; the shortening of items and responses is a standard procedure when transitioning from paper to an electronic format and did not require significant changes to the wording of existing items [26]. A review by translation experts and a lexibility expert resulted in Version 1.0 of the SOBDA questionnaire.

### Cognitive Debriefing Interviews

Four rounds of one-to-one cognitive debriefing interviews were conducted in San Antonio, TX, New Brunswick, NJ, and Topeka, KS. An interview guide with structured and open-ended questions was developed to optimize consistency. Probes were also used to understand how patients interpreted wording in the questionnaire and how they selected their response. The response options (slightly, moderately, severely, and so severe that I could not do the activity) were based on the commonly used Likert scale [27], and patients were asked whether these options were meaningful in terms of their own SOB experience. For each of the response options, patients were asked to provide an activity causing them to experience that level of SOB. Stick figures were used to demonstrate body positions associated with various activities because of the impact certain positions have on SOB. During each interview, patients were shown stick figures in various positions and asked what activities they may conduct in such positions. These figures were included as a referent for the activity described in the text as well as to provide a starting point from which activities could be culturally adapted during the translation process. Although the activities could be altered on the basis of cultural relevance, the body position represented by the stick figures remained the same. The interview guide was updated after each round of interviews, on the basis of patients' comments.

During each round of cognitive interviews, the electronic format of the SOBDA questionnaire was used. Version 1.0 of the SOBDA questionnaire was used in the first two rounds of cognitive debriefing interviews, and this was then refined on the basis of participant feedback and suggestions. Version 1.1 was administered during the third round of interviews, and further changes were subsequently made. The resulting Version 1.2 was reviewed internally by GlaxoSmithKline experts and updated, and Version 1.3 was submitted as part of a briefing package to the FDA. The questionnaire was modified on the basis of FDA feedback, after which Version 1.4 was developed and used during a fourth round of interviews, conducted in Houston, TX, and Topeka, KS. Patients were asked to "think aloud" when they read each question, and to describe the time frame and factors they considered when selecting their response. Also, patients were asked whether they understood the instructions and could explain them in their own words.

### Data Analysis

Descriptive statistics (mean, SD, and frequency) were used to characterize the focus group and cognitive debriefing samples in terms of sociodemographic, health status, and clinical characteristics.

Focus group data analysis focused on establishing content validity of the information gathered [13] and was based on

audiotapes, notes taken by the moderator, and moderator recall of the discussions. The evaluation included 1) generation of key words, phrases, and quotes; 2) rating of these attributes by importance (based on the frequency of which symptoms were mentioned within and between focus groups); and 3) identification of additional themes relevant to participants' experiences. A qualitative analysis software program, ATLAS.ti Version 5.0 [28], facilitated the process. From the evaluation process, a preliminary coding dictionary was developed by a team composed of four members, including two focus group moderators. Words and phrases were selected and grouped into key themes, attributes, concepts, and relationships. Subsequent revisions were made by the team to refine the concepts and respective definitions.

### Focus Group Saturation

The FDA guidance requires evidence of saturation to establish content validity in the development of PRO instruments designed for use as clinical trial end points [13]. The number of participants needed to reach saturation is largely driven by the complexity of the concept and the diversity of the participants.

The qualitative data were examined following the focus groups for specific issues and concerns associated with the SOBDA questionnaire. Instrument revisions were considered on the basis of cognitive debriefing interviews. Qualitative data from the last round of interviews were compared with earlier data to explore patients' interpretation of the items, which enabled the degree of saturation to be assessed.

## Results

### Focus Group Discussions

#### Participant demography and clinical characteristics

Phase 1 (concept elicitation) consisted of seven focus group discussions. A total of 40 patients participated in these focus groups that were conducted in California, Texas, New Jersey, and Florida over a 3-month period. Demographic and clinical characteristics of the patients are provided in Table 1.

#### Emerging themes and concepts and patient description of dyspnea

No differences were found in the descriptions of dyspnea, or activities/experiences with dyspnea between genders or across ethnic or socioeconomic backgrounds. Throughout all focus groups, patients described a feeling of not being able to breathe deeply enough to pull a sufficient amount of air into their lungs. They felt that their lungs could not expand enough to get a full breath of air and described the struggle they had in overcoming the perceived restriction.

The terms "shortness of breath," "difficulty breathing," "labored breathing," "can't breathe," and "out of breath" were frequently used to describe the sensation of dyspnea from COPD. Among all ethnic groups, the expressions "short of breath" or "difficulty breathing" were used most often.

There was consistent distinction between SOB and chest congestion, chest tightness, and wheezing. Chest congestion was described as the sensation of having phlegm or mucus in the chest or throat, with the need to expel or cough. When the moderator probed further, patients reinforced that chest congestion was very different from SOB. Patients often discussed chest tightness in conjunction with SOB, but patients confirmed that these were two different feelings. Most times, chest tightness was described as being a precursor or an indicator that they would not be able to take the next breath as easily. Wheezing was associated with the sound of having phlegm or mucus stuck in the chest or throat.

Some patients were unaware of when they were wheezing, while others were highly bothered by the noise. All patients emphatically concluded that wheezing was different from being short of breath.

**SOB with Activity**

Patients provided a variety of activities in which they experienced SOB. Throughout the group sessions, it became increasingly evident that SOB with some activities had a greater association with body position, as well as the level of exertion. Many patients experienced an increased level of SOB simply by sitting down and bending to tie their shoelaces. A number of body positions were

identified in which patients experienced SOB; patients were asked to identify activities they might do in those positions. Fig. 1 includes a symptom model from the patient perspective. This disease model demonstrates the link between the SOBDA questionnaire items and the pathophysiologic factors associated with SOB. Table 2 provides patients' descriptions of SOB and SOB-related limitations.

**Focus Group Saturation**

Table 3 presents evidence that saturation of the various components of dyspnea described was met through the seven focus

**Table 1 – Demographic and clinical characteristics.**

| Characteristics                          | Focus group participants (n = 40) | Cognitive debriefing participants (n = 37) | Qualitative research total sample (n = 77) |
|------------------------------------------|-----------------------------------|--------------------------------------------|--------------------------------------------|
| Age (y), mean ± SD                       | 66.0 ± 9.0                        | 61.1 ± 11.8                                | 63.6 ± 10.6                                |
| Gender, n (%)                            |                                   |                                            |                                            |
| Male                                     | 16 (40.0)                         | 20 (54.1)                                  | 36 (46.8)                                  |
| Race, n (%)*                             |                                   |                                            |                                            |
| White                                    | 25 (62.5)                         | 22 (59.5)                                  | 47 (61.0)                                  |
| Black/African American                   | 7 (17.5)                          | 3 (8.1)                                    | 10 (13.0)                                  |
| Hispanic or Latino                       | 5 (12.5)                          | 5 (13.5)                                   | 10 (13.0)                                  |
| Asian                                    | 1 (2.5)                           | 7 (18.9)                                   | 8 (10.4)                                   |
| Other                                    | 2 (5.0)                           | 1 (2.7)                                    | 3 (3.9)                                    |
| Employment, n (%)*                       |                                   |                                            |                                            |
| Full-time/part-time                      | 12 (30)                           | 16 (43.2)                                  | 28 (36.4)                                  |
| Retired                                  | 20 (50.0)                         | 16 (43.2)                                  | 36 (46.8)                                  |
| Disabled                                 | 7 (17.5)                          | 7 (18.9)                                   | 14 (18.2)                                  |
| Other                                    | 3 (7.5)                           | 2 (5.4)                                    | 5 (6.5)                                    |
| Education, n (%)                         |                                   |                                            |                                            |
| High school or less                      | 23 (57.5)                         | 22 (59.5)                                  | 45 (58.5)                                  |
| Associate degree/technical/trade school  | 6 (15.0)                          | 7 (18.9)                                   | 13 (16.9)                                  |
| College                                  | 6 (15.0)                          | 5 (13.5)                                   | 11 (14.3)                                  |
| Graduate degree                          | 2 (5.0)                           | 3 (8.1)                                    | 5 (6.5)                                    |
| Other                                    | 3 (7.5)                           | 0 (0)                                      | 3 (3.9)                                    |
| GOLD stage, n (%)                        |                                   |                                            |                                            |
| I                                        | 3 (7.5)                           | 10 (27.0)                                  | 13 (16.9)                                  |
| II                                       | 13 (32.5)                         | 11 (29.7)                                  | 24 (31.2)                                  |
| III                                      | 21 (52.5)                         | 8 (21.6)                                   | 29 (37.7)                                  |
| IV                                       | 3 (7.5)                           | 8 (21.6)                                   | 11 (14.3)                                  |
| Pulmonary function, mean ± SD            |                                   |                                            |                                            |
| FEV1 (L)                                 | 1.3 ± 0.6 <sup>†</sup>            | 1.8 ± 0.8                                  | 1.6 ± 0.8 <sup>‡</sup>                     |
| FEV1 (% predicted)                       | 51.4 ± 19.9 <sup>†</sup>          | 61.5 ± 24.1                                | 56.5 ± 22.5 <sup>‡</sup>                   |
| FVC (L)                                  | 2.3 ± 0.8 <sup>†</sup>            | 3.0 ± 1.1                                  | 2.7 ± 1.0 <sup>‡</sup>                     |
| mMRC, mean ± SD                          | 3.0 ± 1.0                         | 2.8 ± 0.9                                  | 2.9 ± 0.9 <sup>‡</sup>                     |
| Clinician-rated mMRC, n (%)              |                                   |                                            |                                            |
| No breathlessness                        | 3 (7.5)                           | 1 (2.7)                                    | 4 (5.2)                                    |
| Breathlessness when hurrying             | 9 (22.5)                          | 15 (40.5)                                  | 24 (31.2)                                  |
| Walks slower than people of the same age | 10 (25.0)                         | 12 (32.4)                                  | 22 (28.6)                                  |
| Stop for breath                          | 15 (37.5)                         | 9 (24.3)                                   | 24 (31.2)                                  |
| Too breathless                           | 0 (0)                             | 0 (0)                                      | 0 (0)                                      |
| Did not respond                          | 3 (7.5)                           | 0 (0)                                      | 3 (3.8)                                    |
| SGRQ-C                                   |                                   |                                            |                                            |
| Total, mean ± SD                         | 52.4 ± 20.1                       | 51.0 ± 19.1 <sup>  </sup>                  | 51.7 ± 19.5 <sup>*</sup>                   |
| Symptom, mean ± SD                       | 63.7 ± 21.3                       | 55.4 ± 32.0                                | 59.7 ± 27.1                                |
| Activity, mean ± SD                      | 64.5 ± 24.3                       | 65.3 ± 24.6 <sup>†</sup>                   | 64.9 ± 24.3 <sup>#</sup>                   |
| Impact, mean ± SD                        | 40.9 ± 22.7                       | 39.3 ± 20.2 <sup>†</sup>                   | 40.1 ± 21.5 <sup>#</sup>                   |

(Continued on next page)

**Table 1 (continued)**

| Characteristics                   | Focus group participants (n = 40) | Cognitive debriefing participants (n = 37) | Qualitative research total sample (n = 77) |
|-----------------------------------|-----------------------------------|--------------------------------------------|--------------------------------------------|
| <b>CRQ-SAS</b>                    |                                   |                                            |                                            |
| Dyspnea, mean ± SD                | 4.6 ± 1.6                         | 5.0 ± 1.5**                                | 4.8 ± 1.5 <sup>‡</sup>                     |
| Fatigue, mean ± SD                | 4.1 ± 1.1                         | 4.2 ± 1.3 <sup>††</sup>                    | 4.1 ± 1.2 <sup>‡</sup>                     |
| Emotional, mean ± SD              | 4.5 ± 1.0                         | 4.6 ± 0.9 <sup>††</sup>                    | 4.5 ± 1.0 <sup>‡</sup>                     |
| Mastery, mean ± SD                | 4.0 ± 0.8                         | 4.5 ± 1.0 <sup>††</sup>                    | 4.2 ± 0.9 <sup>‡</sup>                     |
| <b>Smoking Status</b>             |                                   |                                            |                                            |
| Current smoker, n (%)             | 10 (25.0)                         | 14 (37.8)                                  | 24 (31.2)                                  |
| Ex-smoker, n (%)                  | 28 (70.0)                         | 23 (62.2)                                  | 51 (66.2)                                  |
| Did not respond                   | 2 (5.0)                           | 0 (0)                                      | 2 (2.6)                                    |
| Current smoker (y), mean ± SD     | 36.0 ± 16.7                       | 29.0 ± 17.6                                | 31.9 ± 17.2                                |
| Ex-smoker—years smoked, mean ± SD | 33.4 ± 10.7                       | 34.8 ± 11.2 <sup>††</sup>                  | 34.0 ± 10.8 <sup>‡</sup>                   |

COPD, chronic obstructive pulmonary disease; CRQ-SAS, Chronic Respiratory Questionnaire – Self-Administered Standardized; FEV1, forced expiratory volume in 1 s; FVC, forced vital capacity; GOLD, Global Initiative for Chronic Obstructive Lung Disease; mMRC, modified Medical Research Council; SGRQ-C, St. George's Respiratory Questionnaire for COPD patients.

\* Not mutually exclusive.

<sup>†</sup> n = 36.

<sup>‡</sup> n = 73.

<sup>‡</sup> n = 74.

<sup>‡</sup> n = 35.

<sup>‡</sup> n = 75.

<sup>#</sup> n = 76.

<sup>\*\*</sup> n = 33.

<sup>††</sup> n = 34.

<sup>‡‡</sup> n = 22.

<sup>‡‡</sup> n = 49.

groups in this study. Specifically, saturation was met in the terminology that patients use to describe dyspnea (“short of breath,” “can’t catch breath,” and “trouble breathing”), body positions (e.g., bending or reaching), and activities when patients experience dyspnea (showing, dressing, housework, exercise, etc.). It was therefore determined that additional focus groups were not necessary. Spontaneous versus probed tallies were not made during the focus groups as concepts were spontaneous only for the first time one patient mentions a concept; it is probed thereafter because the concept is already known to patients and they no longer have the opportunity to be spontaneous.

### Item Pool Development

#### Item wording

Key words used by the patients (e.g., “short of breath” and “dressing”) were instrumental in the development of each item. The importance of key words was determined on the basis of the frequency with which a particular word was used. Body positions of the stick figure illustrations were described by the patients and entered into a grid, followed by activities identified by the patients

for each body position. Response options were also chosen on the basis of patient descriptions of SOB severity from the focus group sessions, including “did not do” to account for adaptation by the patient. Some patients stated that they had difficulty interpreting what “I did not do” meant to them. To clarify the meaning of this response option, “I did not do” was changed to “I did not do the activity today.” In addition, some activities may or may not be performed because of gender; however, the majority of patients stated that their gender did not impact whether they performed the activities listed on the questionnaire.

### Cognitive Debriefing Discussions

#### Patient demography and clinical characteristics

Phase 2 consisted of cognitive debriefing interviews. A total of 37 patients participated in these interviews over a 3-month period: 10 patients participated in the first round, 10 patients in the second round, 5 patients in the third round, and 12 patients in the fourth round. The patients' demographic and clinical characteristics are provided in Table 1.

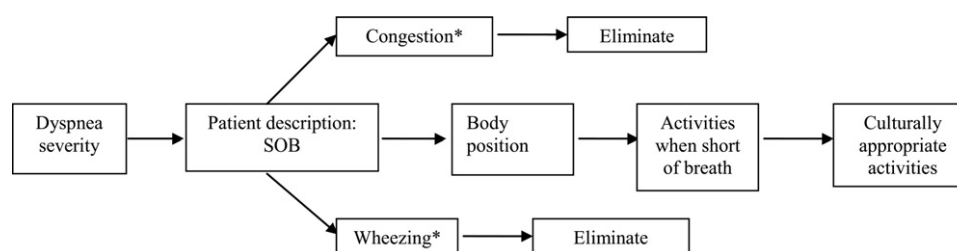

**Fig. 1 – Symptom model from a patient's perspective.** \* During the focus group discussions, patients were able to distinguish SOB from congestion and wheezing.



**Table 2 – Patient descriptions of dyspnea (shortness of breath).**

|                                                                                                                                                                                                                                                                                                                                        |
|----------------------------------------------------------------------------------------------------------------------------------------------------------------------------------------------------------------------------------------------------------------------------------------------------------------------------------------|
| Description of shortness of breath                                                                                                                                                                                                                                                                                                     |
| “Well, it’s like breathing inside a box or something. It’s just kind of a restricted feeling. It’s uncomfortable. It’s restricting.”                                                                                                                                                                                                   |
| “You can’t catch your breath.”                                                                                                                                                                                                                                                                                                         |
| “Without air.”                                                                                                                                                                                                                                                                                                                         |
| “Struggling for breath.”                                                                                                                                                                                                                                                                                                               |
| “Breath gets a little short.”                                                                                                                                                                                                                                                                                                          |
| “I can’t expand my lungs. I can’t pull in enough air.”                                                                                                                                                                                                                                                                                 |
| “Gasping.”                                                                                                                                                                                                                                                                                                                             |
| “You can’t get enough air or oxygen, or whatever the hell it is, to catch your breath.”                                                                                                                                                                                                                                                |
| “Like a struggle for a deep breath. It’s like struggling for breath.”                                                                                                                                                                                                                                                                  |
| “Because really shortness of breath is struggling to take that deep breath. It’s like breathing shallowly as opposed to breathing deeply. I guess I normally would breathe shallowly, and then when sometimes you want to take a deep breath and you just can’t get it.”                                                               |
| “It’s like you’ve got a wet towel over your face.”                                                                                                                                                                                                                                                                                     |
| “Well, you suffocate—it’s absolutely suffocating.”                                                                                                                                                                                                                                                                                     |
| Description of shortness of breath with activities                                                                                                                                                                                                                                                                                     |
| “On the floor and I’m picking stuff up.”                                                                                                                                                                                                                                                                                               |
| “It could be sweeping.”                                                                                                                                                                                                                                                                                                                |
| “Vacuuming and moving furniture around.” “Like cleaning house or something like that, vacuuming is my worst and when I wash windows. But I’m an up-and-down, bending-over type of window washer.”                                                                                                                                      |
| “I have a chair in my shower. I can’t stand up and do this to my hair.”                                                                                                                                                                                                                                                                |
| “I’ve gotten breathless in the shower a couple times, and I just now have realized why. And it is, it’s the bending over to shave my legs. That’s what it is, and I had not related anything to bending over.”                                                                                                                         |
| Adaptation                                                                                                                                                                                                                                                                                                                             |
| “I used to belong to the gym, and I don’t even attempt to do that anymore. Because I really liked the walking and the treadmill and the weights. You’re allowed so much time on the weights, but people are waiting. If it’s going to take you twice as long to use the weights than someone else, people are going to get impatient.” |
| “I don’t do too much reaching because I organized everything in my house that it’s probably just as high as I have to go..... Because I organize things so I don’t have to stretch or do things.”                                                                                                                                      |
| “I cannot talk while I’m going up the stairs. If people want you to “talk” as you’re walking along and going up stairs, I can’t do both. I can do one or the other.”                                                                                                                                                                   |

**Cognitive Debriefing Interviews (First Three Rounds)**

Each interview lasted 1.5 to 2 hours. Overall, the SOBDA questionnaire was well received: patients confirmed that the questionnaire was clear and easy to understand and captured most daily activities. Patients reported that the items were, in general, relevant to their experiences with breathing problems while performing their daily activities. However, those with more severe COPD found some of the items to be less relevant because they were not able to do the activities. In addition, patients were asked whether their gender affected their likelihood of undertaking activities on the questionnaire; the majority said “no.”

The SOBDA questionnaire is intended to be used as a daily diary. However, several interviews were conducted in the morning, which made it difficult for patients to think about their

experiences “today” because it was early. A few patients stated that they thought of a “typical day” or “yesterday” when completing the questions. The patients stated that the instructions and response options on the questionnaire made it very clear that the time frame is “today,” meaning the period of time from when they woke up until they went to bed and that patients should complete the questionnaire before they go to bed at the end of the day.

**Fourth Round of Cognitive Debriefing Interviews**

Following consultation with the FDA, feedback was received stating that illustrating an activity with a specific body position might imply a requirement to perform the activity in that position, while in practice there is variation (e.g., some participants may brush their teeth while standing up instead of bending over the sink). Consequently, the stick figure illustrations were removed to avoid the risk of confusion or nonresponse (“did not do the activity today”). The response options and instructions were also modified on the basis of FDA feedback.

The resulting version (Version 1.4) was presented to patients in the fourth round of cognitive debriefing interviews. Participants with less severe COPD found some items to be less relevant to their SOB experiences, but the range of items successfully ensured applicability across a wide range of patients. Patients using Version 1.4 reported that the instructions were clear and easy to understand. Their explanations of what the instructions and time frame meant were appropriate and indicated correct interpretation.

**Electronic Format User Acceptability**

During all the cognitive debriefing interviews, patients were briefly instructed on how to use the electronic questionnaire, and then asked to answer SOBDA questionnaire items by using a personal digital assistant. During the first three rounds of interviews, participants reported that the electronic format was easy to use and that they would not have a problem using the device in a study. In the fourth round, patients who commented on the use of the personal digital assistant did not report any difficulty.

**Discussion**

In developing an instrument to assess disease symptoms from the patient perspective, the use of patient-based terminology is critical. The SOBDA questionnaire was developed by using a patient-centered approach to the terminology and structure, and patients considered the resulting questionnaire to be clear and easy to understand. In addition, in order to account for possible issues regarding translatability and cultural differences, four translation experts and one lexibility expert reviewed the conceptual model and provided feedback on its relevance in specific countries and at the global level and on the overall translatability of the instrument. In accordance with standard cross-cultural translation and adaptation processes, adjustments were made throughout the development of the SOBDA questionnaire to create an instrument with items that were understandable across cultures, at the appropriate reading grade level for all patients, particularly in areas of limited health literacy, and that could be utilized in clinical trials worldwide [25].

Patients with COPD usually use the term “shortness of breath” to describe their dyspnea [29–36]. Patients with COPD perceive SOB as one of the major symptoms impairing their quality of life and well-being. Ho et al. [8] reported that patients experiencing dyspnea scored significantly lower in all four domains (mobility, kitchen, domestic and leisure activities) of the Nottingham Extended Activities of Daily Living index than do those not experiencing dyspnea [37]. Mobility tasks were affected to the greatest extent. There was also a significant difference in total Hospital Anxiety and Depression

Table 3 – FG saturation grid.

|                                       | FG1<br>(n = 8) | FG2<br>(n = 9) | FG3<br>(n = 5) | FG4<br>(n = 4) | FG5<br>(n = 7) | FG6<br>(n = 4) | FG7<br>(n = 5) |
|---------------------------------------|----------------|----------------|----------------|----------------|----------------|----------------|----------------|
| Dyspnea terms                         |                |                |                |                |                |                |                |
| SOB                                   | ✓              | ✓              | ✓              | ✓              | ✓              | ✓              | ✓              |
| Can't catch breath                    | ✓              | ✓              | ✓              | ✓              | ✓              |                | ✓              |
| Trouble breathing                     | ✓              | ✓              | ✓              | ✓              | ✓              |                | ✓              |
| Labored breathing                     | ✓              | ✓              | ✓              | ✓              | ✓              |                | ✓              |
| Activity                              |                |                |                |                |                |                |                |
| Showering                             |                |                | ✓              | ✓              | ✓              | ✓              |                |
| Dressing                              |                |                |                | ✓              | ✓              | ✓              |                |
| Brushing teeth                        | ✓              |                |                | ✓              |                |                |                |
| Grooming                              | ✓              | ✓              |                | ✓              | *              |                |                |
| Tying shoelaces, pantyhose, and socks |                | ✓              | ✓              | ✓              | ✓              |                | *              |
| Vacuuuming                            | ✓              | ✓              |                | ✓              |                |                |                |
| Housework/ cleaning                   | ✓              | ✓              |                | ✓              | ✓              | ✓              | ✓              |
| Grocery shopping                      | ✓              | ✓              | ✓              | ✓              | ✓              | *              |                |
| Getting mail                          |                |                |                |                |                |                |                |
| Sex                                   | ✓              |                |                |                | ✓              |                |                |
| Walking on level                      | ✓              | ✓              | ✓              | ✓              | ✓              | ✓              | ✓              |
| Walking on incline                    | ✓              | ✓              |                | ✓              | ✓              | ✓              | ✓              |
| Swimming                              |                |                | ✓              |                | ✓              | ✓              | ✓              |
| Biking                                |                |                | ✓              |                | ✓              |                |                |
| Gardening/yard work                   | ✓              | ✓              | ✓              | ✓              | ✓              | ✓              | ✓              |
| Talking                               |                |                | ✓              | ✓              |                | *              |                |
| Laughing                              |                |                |                |                | ✓              |                |                |
| Dancing                               |                | ✓              |                |                | ✓              |                |                |
| Carrying heavy objects                |                |                |                |                | ✓              | ✓              | ✓              |

FG, focus group; SOB, shortness of breath.

\* Participants noted as affecting their breathing only after being prompted by the moderator. FG, focus group; SOB, shortness of breath.

Scale scores between dyspneic subjects and nondyspneic subjects, suggesting that breathing problems are associated with anxiety and depression [37–41]. Patients have described dyspnea as being “hard work” [42], “a constant struggle” [43,44], “a continuous fight” [45], “painful,” “taking all one’s strength,” and “exhausting” [44].

Study participants often find it difficult to convey their personal experience of dyspnea to others. Nicholls [44] observed that patients may instead describe dyspnea by creating mental pictures: “a dark cloud,” “a battle,” “a wall,” or metaphorically, describing that “life was closing in” or that they needed to “steer a careful course” if dyspnea was unpredictable. However, such descriptions are difficult to quantify, necessitating the use of other measures to capture patient experiences. Previously developed PRO questionnaires do not adequately address the dyspnea component of COPD or meet FDA standards for instrument development. For example, the St. George’s Respiratory Questionnaire for COPD patients and other measures such as Chronic Respiratory Questionnaire – Self-Administered Standardized (although well used) have not undergone rigorous study in terms of content validity and ability to reflect patient voice. The FDA requires content validity and saturation of data to be demonstrated for PROs in order for the data to support labeling and promotional claims [13].

In line with FDA guidance, this research was designed to gather qualitative evidence to inform the development of a new PRO instrument, with a focus on measuring the effect of dyspnea on the daily activities of patients with COPD. An important component of qualitative research is establishing content validity. Content validity is the extent to which the content of an instrument represents the most important aspects of a given concept [46]. In the FDA guidance on PRO measurement, content

validity is defined as evidence that the items and domains of an instrument are appropriate and are comprehensive relative to its intended measurement concept, population, and use [13]. Such evidence includes documentation from qualitative research, which demonstrates that the PRO instrument measures the concept of interest. In addition, qualitative patient data are essential for establishing content validity of a PRO instrument. Content validity is essential for the interpretability of the concept measured. Qualitative data in the current evaluation were collected through focus groups with patients with COPD, reviewed by experts in pulmonary research to assess content validity from a clinical perspective, reviewed by translation experts to minimize potential translation difficulties and cross-cultural differences, and discussed during cognitive debriefing interviews with patients to ensure that the draft instrument remained understandable and relevant. The usability of the SOBDA questionnaire on an electronic device was also assessed. The extensive involvement of patients with characteristics typical of those with COPD ensured that the questionnaire effectively reflects patients’ own perspectives.

This article highlights the most important issues and ideas that came out of the focus groups. The terminology used by patients to describe the sensation of dyspnea (SOB), and the varying degrees of SOB associated with everyday activities and hobbies, was the primary focus of discussion. Patients were able to distinguish SOB from chest congestion, wheezing, and chest tightness, and most often described their experience with terms such as “short of breath” and “difficulty breathing.”

Focus group transcripts were central to the development of the item pool. Items were derived from patient comments and experiences related to everyday activities. Stick figure illustrations

were initially included within the instrument because of the reported impact of body position on SOB. The illustrations were later removed from the questionnaire following feedback received from the FDA. It is anticipated, however, that they will be useful during the process of translating the questionnaire as they provide additional information to ensure cross-cultural equivalence.

The qualitative data obtained during the cognitive debriefing interviews were used to confirm the content validity of items selected for the SOBDA questionnaire. Overall, descriptions of dyspnea did not vary across the GOLD stages. The activities listed in the questionnaire represented everyday experiences for GOLD stage I to GOLD stage IV patients, although GOLD stage I patients reported SOB difficulty only when doing physically demanding activities. The questions were designed to measure dyspnea associated with daily activities across a wide range of disease severity to ensure suitability of the SOBDA questionnaire for all patients with COPD.

## Conclusions

Qualitative research with patients with COPD was the basis for developing the SOBDA questionnaire. Patients included in the research had the full range of COPD severity and a wide spread across both socioeconomic status and ethnicity. Concept saturation was reached during patient focus groups. Comments from the FDA were carefully considered, and appropriate revisions were made. The item pool contains 37 items to assess SOB associated with everyday activities. Instructions and response options were well understood by patients with COPD, and the items' relevance was confirmed. Scoring, scaling, reliability, validity, and responsiveness will be assessed in future prospective validation studies.

## Acknowledgments

The authors wish to acknowledge the following individuals who actively contributed to the study completion, including: The United BioSource Corporation (UBC) SOBDA team: Evan Davies, Shannon Kummer, Nancy Kline Leidy, Lindsey Murray, Dennis Revicki, Emily Sargent, and Ren Yu, and formerly of UBC, Tiffany Burch, Jennifer Cabaniss, Sherilyn Notte, Jana Oresanya, Kate VanBrunt, and Kim Walters. The PHT team: Kathryn Klitzner, Ed Yost, and Lisa Steffey. The authors would also like to thank the following clinical experts: Caroline Jolley, John Moxham, Fernando Martínez, and Frank Sciruba, and from the clinical sites: Elena Valor, Shari A. Brazinsky, Pedro Sepulveda, and Edward Fein. The authors would also like to acknowledge the following translation and lexibility experts: Fang Ji-Qian, Dr. Santosh Chaturvedi, Laura Schwartzmann, Sonya Eremenco and Chi-Hung Chang. Editorial support in the form of editorial suggestions to draft versions of this paper, collating author comments and copyediting was provided by Tara N Miller at Gardiner-Caldwell Communications (Lyndhurst, NJ, USA) and Cheryl Wright at Gardiner-Caldwell Communications (Macclesfield, UK) and was funded by GlaxoSmithKline.

Source of financial support: Funding for this research was provided by GlaxoSmithKline. All listed authors meet the criteria for authorship set forth by the International Committee for Medical Journal Editors.

## REFERENCES

- [1] GOLD: Global Strategy for the Diagnosis, Management, and Prevention of COPD – updated 2011. Available from: <http://www.goldcopd.org>. [Accessed May 23, 2012].

- [2] Nishimura K, Izumi T, Tsukino M, Oga T. Dyspnea is a better predictor of 5-year survival than airway obstruction in patients. *Chest* 2002;121:1434–40.
- [3] Jones PW, Agusti AG. Outcomes and markers in the assessment of chronic obstructive pulmonary disease. *Eur Respir J* 2006;27:822–32.
- [4] Vestbo J, Anderson W, Coxson HO, et al. Evaluation of COPD Longitudinally to Identify Predictive Surrogate Endpoints (ECLIPSE). *Eur Respir J* 2008;31:869–73.
- [5] Han MK, Agusti A, Calverley PM, et al. Chronic obstructive pulmonary disease phenotypes: the future of COPD. *Am J Respir Crit Care Med* 2010;182:598–604.
- [6] Jadad A, Rizo C, Cubillos P, Stahl E. Measuring symptom response to pharmacological interventions in patients with COPD: a review of instruments used in clinical trials. *Curr Med Res Opin* 2004;20:1993–2005.
- [7] Eakin EG, Resnikoff PM, Prewitt LM, et al. Validation of a new dyspnea measure: the UCSD Shortness of Breath Questionnaire. University of California. San Diego. *Chest* 1998;113:619–24.
- [8] Ho SF, O'Mahony MS, Steward JA, et al. Dyspnoea and quality of life in older people at home. *Age Ageing* 2001;30:155–9.
- [9] Jolley CJ, Moxham J. A physiological model of patient-reported breathlessness during daily activities in COPD. *Eur Respir Rev* 2009;18:66–79.
- [10] Watz H, Waschki B, Meyer T, Magnussen H. Physical activity in patients with COPD. *Eur Respir J* 2009;33:262–72.
- [11] Celli BR, MacNee W. Standards for the diagnosis and treatment of patients with COPD: a summary of the ATS/ERS position paper. *Eur Resp J* 2004;23:932–46.
- [12] Victorson DE, Anton S, Hamilton A, et al. A conceptual model of the experience of dyspnea and functional limitations in chronic obstructive pulmonary disease. *Value Health* 2009;12:1018–25.
- [13] Food and Drug Administration. Guidance for industry on patient-reported outcome measures: use in medical product development to support labeling claims. 2009. Available from: [www.fda.gov](http://www.fda.gov). [Accessed May 23, 2012].
- [14] Krieger N. Overcoming the absence of socioeconomic data in medical records: validation and application of a census-based methodology. *Am J Public Health* 1992;82:703–10.
- [15] Patrick DL, Burke LB, Powers JH, et al. Patient-reported outcomes to support medical product labeling claims: FDA perspective. *Value Health* 2007;10(Suppl):S125–37.
- [16] Guest G, Bunce A, Johnson L. How many interviews are enough? An experiment with data saturation and variability. *Field Methods* 2006;18:59–82.
- [17] Leidy NK, Vernon M. Perspectives on patient-reported outcomes: content validity and qualitative research in a changing clinical trial environment. *Value Health* 2007;10(Suppl. 2):S125–37.
- [18] Patrick DL, Burke LB, Gwaltney CJ, et al. Content validity—establishing and reporting the evidence in newly developed Patient-Reported Outcomes (PRO) instruments for medical product evaluation: ISPOR PRO Good Research Practices Task Force Report: part 1—eliciting concepts for a new PRO instrument. *Value Health* 2011;14:967–77.
- [19] Schilling RSF, Hughes JPW, Dingwall-Fordyce I. Disagreement between observers in an epidemiological study of respiratory disease. *BMJ* 1955;1:65–8.
- [20] Jones PW, Quirk FH, Baveystock CM. The St. George's Respiratory Questionnaire. *Respir Med* 1991;85(Suppl. B):25–31.
- [21] Jones PW, Quirk FH, Baveystock CM, Littlejohns P. A self-complete measure of health status for chronic airflow limitation: The St George's Respiratory Questionnaire. *Ann Rev Respir Dis* 1992;145:1321–7.
- [22] Aaron SD, Vandemheen KL, Hebert P, et al. Outpatient oral prednisone after emergency treatment of chronic obstructive pulmonary disease. *N Engl J Med* 2003;348:2618–25.
- [23] Aaron SD, Vandemheen KL, Clinch JJ, et al. Measurement of short-term changes in dyspnea and disease-specific quality of life following an acute COPD exacerbation. *Chest* 2002;121:688–96.
- [24] Parker CM, Voduc N, Aaron SD, et al. Physiological changes during symptom recovery from moderate exacerbations of COPD. *Eur Respir J* 2005;26:420–8.
- [25] Wild D, Grove A, Martin M, et al. Principles of good practice for the translation and cultural adaptation process for patient reported outcome (PRO) measures: report of the ISPOR Task Force for Translation and Cultural Adaptation. *Value Health* 2005;8:94–104.
- [26] Coons SJ, Gwaltney CJ, Hays RD, et al. Recommendations of evidence needed to support measurement of equivalence between electronic and paper-based patient-reported outcome (PRO) measures: ISPOR ePRO Good Research Practices Task Force Report. *Value Health* 2009;12:410–29.
- [27] Likert R. A technique for the measurement of attitudes. *Arch Psychol* 1932;140:1–55.
- [28] Muhr T. User's Manual for ATLAS.ti 5.0 (2nd ed.). Copyright © 2003–2004 by Tomas Muhr. Berlin: ATLAS.ti scientific Software Development, 2004.

- 1  
2  
3  
4  
5  
6 [29] Carrieri VK, Janson-Bjerklie S, Jacobs S. The sensation of dyspnea: a  
7 review. *Heart Lung* 1984;13:436-47.
- 8 [30] Carrieri-Kohlman V, Gormley JM, Eiser S, et al. Dyspnea and the  
9 affective response during exercise training in obstructive pulmonary  
10 disease. *Nurs Res* 2001;50:136-46.
- 11 [31] DeVito AJ. Dyspnea during hospitalizations for acute phase of illness as  
12 recalled by patients with chronic obstructive pulmonary disease. *Heart  
13 Lung* 1990;19:186-91.
- 14 [32] Gift AG, Moore T, Soeken K. Relaxation to reduce dyspnea and anxiety  
15 in COPD patients. *Nurs Res* 1992;41:242-6.
- 16 [33] Lareau S, Larson JL. Ineffective breathing pattern related to airflow  
17 limitation. *Nurs Clin North Am* 1987;22:179-91.
- 18 [34] Mahler DA, Mejia-Alfaro R, Ward J, Baird JC. Continuous measurement  
19 of breathlessness during exercise: validity, reliability, and  
20 responsiveness. *J Appl Physiol* 2001;90:2188-96.
- 21 [35] Small S, Lamb M. Fatigue in chronic illness: the experience of  
22 individuals with chronic obstructive pulmonary disease and with  
23 asthma. *J Adv Nurs* 1999;30:469-78.
- 24 [36] Wasserman K, Casaburi R. Dyspnea: physiological and  
25 pathophysiological mechanisms. *Annu Rev Med* 1988;39:503-15.
- 26 [37] von Leupoldt A, Dahme B. Psychological aspects in the perception of  
27 dyspnea in obstructive pulmonary diseases. *Respir Med*  
28 2007;101:411-22.
- 29 [38] Carrieri-Kohlman V, Donesky-Cuenco D, Park SK, et al. Additional  
30 evidence for the affective dimension of dyspnea in patients with COPD.  
31 *Res Nurs Health* 2010;33:4-19.
- 32 [39] Hill K, Geist R, Goldstein RS, Lacasse Y. Anxiety and depression in end-  
33 stage COPD. *Eur Respir J* 2008;31:667-77.
- 34 [40] Nguyen HQ, Carrieri-Kohlman V. Dyspnea self-management in patients  
35 with chronic obstructive pulmonary disease: moderating effects of  
36 depressed mood. *Psychosomatics* 2005;46:402-10.
- 37 [41] Norwood R, Balkissoon R. Current perspectives on management of co-  
38 morbid depression in COPD. *COPD* 2005;2:185-93.
- 39 [42] Elofsson LC, Ohlen J. Meanings of being old and living with chronic  
40 obstructive pulmonary disease. *Palliat Med* 2004;18:611-8.
- 41 [43] Barnett M. Chronic obstructive pulmonary disease: a  
42 phenomenological study of patients' experiences. *J Clin Nurs*  
43 2005;14:805-12.
- 44 [44] Nicholls DA. The experience of breathlessness. *Physiother Theory Pract*  
45 2003;19:123-36.
- 46 [45] Jonsdottir H. Life patterns of people with chronic obstructive pulmonary  
47 disease: isolation and being closed in. *Nurs Sci Q* 1998;11:160-6.
- 48 [46] Leidy NK, Vernon M. Perspectives on patient-reported outcomes:  
49 content validity and qualitative research in a changing clinical trial  
50 environment. *Pharmacoeconomics* 2008;26(5):363-70.
- 51  
52  
53  
54  
55  
56  
57  
58  
59  
60

# Please wait...

If this message is not eventually replaced by the proper contents of the document, your PDF viewer may not be able to display this type of document.

You can upgrade to the latest version of Adobe Reader for Windows®, Mac, or Linux® by visiting <http://www.adobe.com/products/acrobat/readstep2.html>.

For more assistance with Adobe Reader visit <http://www.adobe.com/support/products/acrreader.html>.

Windows is either a registered trademark or a trademark of Microsoft Corporation in the United States and/or other countries. Mac is a trademark of Apple Inc., registered in the United States and other countries. Linux is the registered trademark of Linus Torvalds in the U.S. and other countries.

# Please wait...

If this message is not eventually replaced by the proper contents of the document, your PDF viewer may not be able to display this type of document.

You can upgrade to the latest version of Adobe Reader for Windows®, Mac, or Linux® by visiting <http://www.adobe.com/products/acrobat/readstep2.html>.

For more assistance with Adobe Reader visit <http://www.adobe.com/support/products/acrreader.html>.

Windows is either a registered trademark or a trademark of Microsoft Corporation in the United States and/or other countries. Mac is a trademark of Apple Inc., registered in the United States and other countries. Linux is the registered trademark of Linus Torvalds in the U.S. and other countries.

# Please wait...

If this message is not eventually replaced by the proper contents of the document, your PDF viewer may not be able to display this type of document.

You can upgrade to the latest version of Adobe Reader for Windows®, Mac, or Linux® by visiting [http://www.adobe.com/go/reader\\_download](http://www.adobe.com/go/reader_download).

For more assistance with Adobe Reader visit <http://www.adobe.com/go/acrreader>.

Windows is either a registered trademark or a trademark of Microsoft Corporation in the United States and/or other countries. Mac is a trademark of Apple Inc., registered in the United States and other countries. Linux is the registered trademark of Linus Torvalds in the U.S. and other countries.

To view the full contents of this document, you need a later version of the PDF viewer. You can upgrade to the latest version of Adobe Reader from [www.adobe.com/products/acrobat/readstep2.html](http://www.adobe.com/products/acrobat/readstep2.html)

For further support, go to [www.adobe.com/support/products/acrreader.html](http://www.adobe.com/support/products/acrreader.html)



# Please wait...

If this message is not eventually replaced by the proper contents of the document, your PDF viewer may not be able to display this type of document.

You can upgrade to the latest version of Adobe Reader for Windows®, Mac, or Linux® by visiting <http://www.adobe.com/products/acrobat/readstep2.html>.

For more assistance with Adobe Reader visit <http://www.adobe.com/support/products/acrreader.html>.

Windows is either a registered trademark or a trademark of Microsoft Corporation in the United States and/or other countries. Mac is a trademark of Apple Inc., registered in the United States and other countries. Linux is the registered trademark of Linus Torvalds in the U.S. and other countries.

# Please wait...

If this message is not eventually replaced by the proper contents of the document, your PDF viewer may not be able to display this type of document.

You can upgrade to the latest version of Adobe Reader for Windows®, Mac, or Linux® by visiting <http://www.adobe.com/products/acrobat/readstep2.html>.

For more assistance with Adobe Reader visit <http://www.adobe.com/support/products/acrreader.html>.

Windows is either a registered trademark or a trademark of Microsoft Corporation in the United States and/or other countries. Mac is a trademark of Apple Inc., registered in the United States and other countries. Linux is the registered trademark of Linus Torvalds in the U.S. and other countries.

# Please wait...

If this message is not eventually replaced by the proper contents of the document, your PDF viewer may not be able to display this type of document.

You can upgrade to the latest version of Adobe Reader for Windows®, Mac, or Linux® by visiting <http://www.adobe.com/products/acrobat/readstep2.html>.

For more assistance with Adobe Reader visit <http://www.adobe.com/support/products/acrreader.html>.

Windows is either a registered trademark or a trademark of Microsoft Corporation in the United States and/or other countries. Mac is a trademark of Apple Inc., registered in the United States and other countries. Linux is the registered trademark of Linus Torvalds in the U.S. and other countries.

# Please wait...

If this message is not eventually replaced by the proper contents of the document, your PDF viewer may not be able to display this type of document.

You can upgrade to the latest version of Adobe Reader for Windows®, Mac, or Linux® by visiting <http://www.adobe.com/products/acrobat/readstep2.html>.

For more assistance with Adobe Reader visit <http://www.adobe.com/support/products/acrreader.html>.

Windows is either a registered trademark or a trademark of Microsoft Corporation in the United States and/or other countries. Mac is a trademark of Apple Inc., registered in the United States and other countries. Linux is the registered trademark of Linus Torvalds in the U.S. and other countries.



**Shortness of Breath with Daily Activities questionnaire:  
validation and responder thresholds in patients with chronic  
obstructive pulmonary disease**

|                                 |                                                                                                                                                                                                                                                                                                                                                                                                                                                                                                                                                                                                                                                                          |
|---------------------------------|--------------------------------------------------------------------------------------------------------------------------------------------------------------------------------------------------------------------------------------------------------------------------------------------------------------------------------------------------------------------------------------------------------------------------------------------------------------------------------------------------------------------------------------------------------------------------------------------------------------------------------------------------------------------------|
| Journal:                        | <i>BMJ Open</i>                                                                                                                                                                                                                                                                                                                                                                                                                                                                                                                                                                                                                                                          |
| Manuscript ID:                  | bmjopen-2013-003048.R1                                                                                                                                                                                                                                                                                                                                                                                                                                                                                                                                                                                                                                                   |
| Article Type:                   | Research                                                                                                                                                                                                                                                                                                                                                                                                                                                                                                                                                                                                                                                                 |
| Date Submitted by the Author:   | 23-Jul-2013                                                                                                                                                                                                                                                                                                                                                                                                                                                                                                                                                                                                                                                              |
| Complete List of Authors:       | Watkins, Michael; GlaxoSmithKline, Respiratory Medicines Development Center<br>Wilcox, Teresa; Evidera (formerly United BioSource Corporation),<br>Tabberer, Maggie; GlaxoSmithKline, Respiratory Medicines Development Centre<br>Brooks, Jean; GlaxoSmithKline, Respiratory Medicines Development Centre<br>Donohue, James; University of North Carolina, Division of Pulmonary and Critical Care Medicine<br>Anzueto, Antonio; South Texas Veterans Health Care System and University of Texas Health Science Center,<br>Chen, Wen-Hung; Evidera (formerly United BioSource Corporation),<br>Crim, Courtney; GlaxoSmithKline, Respiratory Medicines Development Center |
| <b>Primary Subject Heading</b>: | Respiratory medicine                                                                                                                                                                                                                                                                                                                                                                                                                                                                                                                                                                                                                                                     |
| Secondary Subject Heading:      | Patient-centred medicine                                                                                                                                                                                                                                                                                                                                                                                                                                                                                                                                                                                                                                                 |
| Keywords:                       | Chronic airways disease < THORACIC MEDICINE, THORACIC MEDICINE, RESPIRATORY MEDICINE (see Thoracic Medicine)                                                                                                                                                                                                                                                                                                                                                                                                                                                                                                                                                             |
|                                 |                                                                                                                                                                                                                                                                                                                                                                                                                                                                                                                                                                                                                                                                          |

SCHOLARONE™  
Manuscripts

1  
2  
3 **Shortness of Breath with Daily Activities questionnaire: validation and**  
4 **responder thresholds in patients with chronic obstructive pulmonary disease**  
5  
6  
7

8 **Michael L Watkins,<sup>1</sup> Teresa K Wilcox,<sup>2</sup> Maggie Tabberer,<sup>3</sup> Jean M Brooks,<sup>3</sup>**  
9  
10 **James F Donohue,<sup>4</sup> Antonio Anzueto,<sup>5</sup> Wen-Hung Chen,<sup>2</sup> Courtney Crim<sup>1</sup>**  
11

12  
13  
14 <sup>1</sup>Respiratory Medicines Development Center, GlaxoSmithKline, Research Triangle Park,  
15 North Carolina, USA  
16

17  
18 <sup>2</sup>United BioSource Corporation, Bethesda, Maryland, USA  
19

20 <sup>3</sup>Respiratory Medicines Development Centre, GlaxoSmithKline, Uxbridge, UK  
21

22 <sup>4</sup>Division of Pulmonary and Critical Care Medicine, University of North Carolina, Chapel Hill,  
23 North Carolina, USA  
24

25  
26 <sup>5</sup>South Texas Veterans Health Care System and University of Texas Health Science Center,  
27 San Antonio, Texas, USA  
28  
29

30  
31 **Word counts etc**  
32

33 Total: 3876 words (4000 recommended)  
34

35 Abstract: 298 words (300 permitted)  
36

37 Figure/tables: 1 figure, 3 tables (max of 5 recommended)  
38  
39

40 **Running header:** Validation of SOBDA questionnaire  
41  
42

43 **Correspondence to:**  
44

45 Michael Watkins, Respiratory Medicines Development Center, GlaxoSmithKline, Research  
46 Triangle Park, NC 27613, United States. E-mail: [michael.l.watkins@gsk.com](mailto:michael.l.watkins@gsk.com).  
47

48  
49 Tel. +1 (919) 483-0449. Fax. +1 (919) 483-4300  
50  
51

52  
53 **Running title:** Validation of SOBDA Questionnaire  
54

55 **Key words:** dyspnoea, breathlessness, patient-reported outcomes, COPD  
56  
57  
58  
59  
60

## ABSTRACT

**Objectives:** To test the reliability, validity and responsiveness of the 13-item Shortness of Breath with Daily Activities (SOBDA) questionnaire, and determine the threshold for response and minimal important difference (MID).

**Design:** Six-week, randomised, double-blind, placebo-controlled study.

**Setting:** Forty centres in the United States between 29 Oct 2009 and 1 July 2010.

**Primary and secondary outcome measures:** 547 patients with chronic obstructive pulmonary disease (COPD) were enrolled and 418 entered the 2-week run-in period. Data from the run-in period were collected to test internal consistency, test-retest reliability, convergent validity, and known-groups validity of the SOBDA. 366 patients were randomised 2:2:1 to fluticasone propionate/salmeterol 250/50 µg, salmeterol 50 µg, or placebo, twice daily. Results from the SOBDA questionnaire, Patient Global Assessment of Change Question, modified Medical Research Council Dyspnoea Scale (mMRC), Clinician Global Impression of Dyspnoea Severity (CGI-S), Clinician Global Impression of Change Question, and Chronic Respiratory Disease Questionnaire self-administered standardised version (CRQ-SAS) were evaluated; spirometry and safety parameters were measured. Study endpoints were selected to investigate cross-sectional and longitudinal validity of the SOBDA in relation to clinical criteria.

**Results:** Internal consistency of the SOBDA questionnaire (Cronbach alpha) was 0.89. Test-retest reliability (intraclass correlation) was 0.94. SOBDA weekly scores correlated with patient-reported and clinician-reported mMRC, CGI-S, and CRQ-SAS dyspnoea domain scores (0.29, 0.24, 0.24, -0.68, respectively). SOBDA weekly scores differentiated responders and non-responders as rated by patients and clinicians. Anchor- and supportive distribution-based analyses produced a range of potential values for the threshold for responders and MID.

1  
2  
3 **Conclusions:** The 13-item SOBDA questionnaire is reliable, valid, and responsive to  
4 change in patients with COPD. Using anchor-based methods, the proposed responder  
5 threshold is a –0.1 to –0.2 score change. A specific threshold value will be identified as more  
6 data are generated from future clinical trials.  
7  
8  
9

10  
11 **Trial registration:** NCT00984659; **GlaxoSmithKline study number:** ASQ112989  
12  
13

14  
15 **Word count of the abstract:** 298  
16  
17  
18  
19  
20  
21  
22  
23  
24  
25  
26  
27  
28  
29  
30  
31  
32  
33  
34  
35  
36  
37  
38  
39  
40  
41  
42  
43  
44  
45  
46  
47  
48  
49  
50  
51  
52  
53  
54  
55  
56  
57  
58  
59  
60



## ARTICLE SUMMARY

### Article focus

- Dyspnoea, often referred to as 'shortness of breath' or 'breathlessness', is commonly associated with decreases in functional status, quality of life, and other disabilities.
- The patient-reported outcome questionnaire was developed to specifically assess Shortness of Breath with Daily Activities (SOBDA) in patients with chronic obstructive pulmonary disease (COPD).
- An initial non-interventional study (A2-4398-003)<sup>1</sup> showed internal consistency and test-retest reliability. The current study (NCT00984659; ASQ112989) was conducted to reconfirm the reliability, validity, and responsiveness of the 13-item SOBDA questionnaire and to determine the threshold for response and the minimal important difference of the final questionnaire.

### Key messages

- The current study demonstrates that the 13-item SOBDA questionnaire is reliable, valid, and responsive to change in patients with COPD. The proposed responder threshold is a  $-0.1$  to  $-0.2$  score change with a specific threshold value to be determined as more data are generated from future clinical trials.

### Strengths and limitations of the study

- This study reconfirmed the initial psychometric validation observed in the non-interventional study (A2-4398-003).<sup>1</sup>
- Only patients with modified Medical Research Council Dyspnoea Scale  $\geq 2$  were included in the patient population, thereby restricting the shortness of breath severity range. Approximately half of the patients also did not answer the last Patient Global

1  
2  
3  
4  
5  
6  
7  
8  
9  
10  
11  
12  
13  
14  
15  
16  
17  
18  
19  
20  
21  
22  
23  
24  
25  
26  
27  
28  
29  
30  
31  
32  
33  
34  
35  
36  
37  
38  
39  
40  
41  
42  
43  
44  
45  
46  
47  
48  
49  
50  
51  
52  
53  
54  
55  
56  
57  
58  
59  
60

Assessment of Change question. These limitations may have affected some of the validity assessments.

For peer review only

## INTRODUCTION

Dyspnoea, sometimes referred to as 'shortness of breath' or 'breathlessness' by the patient, is a common and significant complaint of patients with chronic obstructive pulmonary disease (COPD). In one survey of 3,000 COPD patients, 56% were found to have breathlessness during normal physical activities and 42% reported breathlessness while doing household chores.<sup>2</sup>

Capturing the effect of a treatment intervention on dyspnoea from the patient's perspective is therefore an important objective in order to demonstrate treatment effectiveness. While patient-reported aspects of COPD have been assessed using currently available instruments, most do not adequately address the concept of dyspnoea in patients with COPD for use in clinical trials, due to limited assessment of psychometric properties during development of the questionnaire or inconsistent clinical validity in use. In addition, there are no currently available instruments for assessing COPD-related dyspnoea that can support a specific label claim for a medicinal product in the United States.

The Shortness of Breath with Daily Activities (SOBDA) questionnaire is a daily diary questionnaire developed to quantify a patient's perception of dyspnoea related to daily activities and how this changes over time during treatment.<sup>1,3</sup> Development of the SOBDA questionnaire followed the Patient-Reported Outcomes Guidance for drug development issued by the US Food and Drug Administration<sup>4</sup> and included the creation of an endpoint rationale and the development of a conceptual framework.<sup>3</sup> Qualitative research, including individual interviews and patient focus groups, was used to develop potential questions (item pool), item format and response options, which were subject to clinical and translation expert review. Further cognitive interviews with patients were conducted to test content validity.<sup>3</sup> The item pool was tested in a non-interventional study, and the number of items was appropriately reduced to produce the final SOBDA questionnaire.<sup>1</sup> Initial psychometric

1  
2  
3 validation from this non-interventional study showed excellent internal consistency and test-  
4  
5 retest reliability.<sup>1</sup>  
6  
7

8 The objectives of this study were to (i) confirm the reliability and validity, (ii) evaluate the  
9  
10 responsiveness, (iii) define the threshold for responder and also the minimal important  
11  
12 difference (MID) of the final SOBDA questionnaire in patients with COPD. The threshold for  
13  
14 response was established by comparing SOBDA change scores for responders and non-  
15  
16 responders, defined according to a range of established patient- and clinician-completed  
17  
18 assessments. The study included active treatments to ensure some patients would be  
19  
20 classified as 'responders' on the established clinical measures.  
21  
22

## 23 **METHODS**

### 24 **Patients**

25  
26  
27 Male and female patients  $\geq 40$  years of age with an established clinical history of COPD in  
28  
29 accordance with the American Thoracic Society/European Respiratory Society definitions<sup>5</sup>  
30  
31 were recruited. At screening, patients were required to have a post-salbutamol forced  
32  
33 expiratory volume in one second ( $FEV_{1}$ )  $\leq 70\%$  of predicted normal and  $FEV_{1}$  /forced vital  
34  
35 capacity (FVC) ratio of  $< 0.70$ ; to be a current or former smoker with a history of at least 10  
36  
37 pack-years; and to demonstrate evidence of dyspnoea as assessed by a patient-reported  
38  
39 modified Medical Research Council Dyspnoea Scale (mMRC) score  $\geq 2$ . The study protocol  
40  
41 was institutional review board-approved and all patients provided written informed consent  
42  
43 before enrolment.  
44  
45  
46  
47  
48

### 49 **Study design**

50  
51  
52 This randomised, double-blind, placebo-controlled study was conducted at 40 centres in the  
53  
54 USA from 29 Oct 2009 to 01 July 2010 (Trial registration: NCT00984659; GlaxoSmithKline  
55  
56 study number: ASQ112989). Patients attended three clinic visits. At screening visit 1, eligible  
57  
58  
59  
60

1  
2  
3 patients entered a 2-week run-in period during which short-acting bronchodilator rescue  
4 medications (salbutamol and/or ipratropium) were permitted. At visit 2, eligible patients were  
5 randomised (2:2:1) to receive fluticasone propionate/salmeterol combination (FSC)  
6  
7 250/50 µg, salmeterol (SAL) 50 µg or placebo, all administered twice daily via a DISKUS®  
8  
9 inhaler, for 6 weeks. The final dose of study medication was taken on the day before visit 3  
10  
11 (week 6). In the event of a patient not completing the week 6 visit, attempts were made for  
12  
13 the patient to attend an early withdrawal visit that included the week 6 assessments.  
14  
15

16  
17  
18 All non-COPD medications, including pre-existing selective beta-blocker therapy, could be  
19  
20 continued if their dose remained constant. Concurrent use of inhaled or oral corticosteroids,  
21  
22 long-term oxygen therapy, long-acting bronchodilators, and theophylline were exclusion  
23  
24 criteria within the study protocol.  
25

## 26 27 **Measurements and assessments**

28  
29  
30 Patient-completed measures: SOBDA questionnaire

31  
32  
33 The 13-item SOBDA questionnaire (box 1) was completed on an electronic diary (e-diary)  
34  
35 each evening immediately before bedtime, which allowed the patient to reflect on and  
36  
37 capture the current day's activities.<sup>13</sup> All items followed the same format: 'How breathless  
38  
39 were you when [completing the specified activity]?' Individual item responses are completed  
40  
41 on a scale from 'not at all' to 'so short of breath I did not do the activity'. Items 1–4, 6, 8, 9,  
42  
43 11, and 12 are scored from 1 ('not at all'), 2 ('slightly'), 3 ('moderately'), to 4 ('severely' or 'so  
44  
45 severely that I did not do the activity today'), and items 5, 7, 10, and 13 are scored from 1  
46  
47 ('not at all' and 'slightly'), 3 ('moderately'), and 4 ('severely' or 'so severely that I did not do  
48  
49 the activity today'). Patients were also given an option of 'did not do' for activities they did not  
50  
51 perform for other reasons. In scoring the questionnaire, these responses were regarded as  
52  
53 missing data. Due to the design of the e-diary, it was not possible for patients to skip  
54  
55 individual questions within the diary although a full day of data could be missed if the patient  
56  
57 did not access the diary within the time window allowed.  
58  
59  
60

Analyses were conducted aggregating daily data over weekly time periods to account for day-to-day variability and the fact that not all activities were performed every day. A daily SOBDA score was computed across the 13 items as a mean score ranging from 1 to 4, if at least 7 items had non-missing scores. A weekly mean SOBDA score was then computed as the mean of the daily mean scores in a 7-day period, if at least 4 out of 7 days had non-missing SOBDA daily scores. The baseline SOBDA weekly score for each patient was calculated as the mean value during the week before randomisation.

#### Patient-completed measures: other

Additional questions were completed via e-diary, daily or weekly. Daily questions included any form of contact with healthcare professionals, frequency of rescue medication use, and completion of a Global Assessment of Shortness of Breath question: 'Overall, were you short of breath during your activities today?' Patients responded to this question on a 5-point scale from '1=not at all' to '5=extremely'. Every 7 days, patients responded to a Patient Global Assessment of Change (PGAC) question that asked, 'Compared to last week (7 days ago), how was your shortness of breath today?' on a scale of '1=much worse' to '5=much better', with 3='no change'.

Patients completed the mMRC at each clinic visit and the 20-item Chronic Respiratory Disease Questionnaire self-administered standardised version (CRQ-SAS) at visit 2 and week 6/early withdrawal.

#### Clinician-completed assessments

A Clinician Global Impression of Dyspnoea Severity (CGI-S) question to assess dyspnoea severity on a scale of 1 (mild) to 4 (very severe) was completed at visit 2 and week 6/early withdrawal. A Clinician Global Impression of Change (CGI-C) question to assess change in dyspnoea on a scale of 1 (much worse) to 5 (much better), with 3 being no change, was

1  
2  
3 completed at week 6/early withdrawal. Clinicians rated the patient's dyspnoea on the 5-point  
4 mMRC scale at each clinic visit.  
5  
6

## 7 8 Spirometry 9

10 Spirometry (FEV<sub>1</sub> and FVC) was performed at all clinic visits after the questionnaires were  
11 completed. FEV<sub>1</sub> responders were defined as patients who had a change of ≥100 ml from  
12 visit 2 to week 6/early withdrawal, whereas FEV<sub>1</sub> non-responders were those patients with a  
13 change of <100 ml. Bronchodilator reversibility testing was also performed 30 min post-  
14 salbutamol (360 µg) at screening. Predicted FEV<sub>1</sub> values were calculated according to  
15 National Health and Nutrition Examination Survey III reference values.<sup>6</sup>  
16  
17  
18  
19  
20  
21  
22

## 23 24 Safety 25

26 Safety was assessed by reported adverse events (AEs) and COPD exacerbations.  
27  
28  
29

## 30 31 Statistical analyses 32

### 33 34 Sample size and powering 35

36 Sample size calculations were based on evaluation of the responsiveness of the SOBDA  
37 questionnaire<sup>1,3</sup> and allowed for comparison of SOBDA change scores for responders and  
38 non-responders. Calculations assumed 90% power, a two-sided 5% significance level, and a  
39 standardised between-groups effect size of 0.5 (defined as the difference between  
40 responders and non-responders divided by the standard deviation of the difference). The  
41 sample size was increased to allow exploratory comparisons of SOBDA scores between  
42 treatment arms. Assuming 90% of randomised patients would provide sufficient data for this  
43 comparison and a randomisation ratio of 2:2:1, approximately 350 patients were planned for  
44 randomisation in order to provide 320 evaluable patients.  
45  
46  
47  
48  
49  
50  
51  
52  
53  
54  
55  
56  
57  
58  
59  
60

Analyses for the internal consistency, test-retest reliability in a stable population, convergent validity, and known-groups validity were based upon the data collected from the run-in population. This population consisted of randomised and non-randomised patients who completed visit 2. The responsiveness to change of the SOBDA was based on data collected from the modified intent-to-treat (mITT) population, defined as all patients who were randomised to treatment and who received at least one dose of study drug, and analyzed according to the treatment actually received if this was different from the randomised treatment assignment.

### Internal consistency

To confirm the reliability and validity of the SOBDA questionnaire,<sup>1</sup> the internal consistency of the instrument was assessed and summary scores were compared with other endpoints collected.

The internal consistency of the SOBDA score was assessed for patients with a non-missing score for each item at day 1 of the run-in period by using Cronbach's formula for coefficient alpha (scale from 0 to 1.0); a value of 0.70 or greater is recognised as indicating acceptable internal consistency for an instrument.<sup>7</sup> Pearson's correlation and Intraclass correlation coefficient (ICC) were used to evaluate test-retest reliability, comparing SOBDA weekly scores for patients who reported no change on their weekly PGAC assessment during weeks 1 and 2 of the run-in period.

SOBDA weekly scores were compared with other relevant study measures to establish the convergent and known-groups validity of the instrument. Convergent validity was assessed by examining the Spearman rank order correlation coefficient between baseline SOBDA weekly score and both mMRC (patient and clinician) ratings and CGI-S ratings at visit 2. The Pearson's correlation coefficient between the baseline SOBDA weekly scores and the CRQ-SAS dyspnoea domain score at visit 2 were also assessed. Known-groups validity, demonstrating that groups of patients who are known to be different report different SOBDA



1  
2  
3 scores, was assessed by comparisons of SOBDA weekly scores between groups of patients  
4 based on mMRC (patient and clinician) ratings and CGI-S ratings collected at visit 2 using  
5 analysis of covariance (ANCOVA) models adjusted for age, gender, and FEV<sub>1</sub> % predicted  
6 measured during the screening visit.  
7  
8  
9

#### 10 11 12 Threshold for responsiveness and MID

13  
14  
15 Responsiveness of the SOBDA was evaluated using the differences in weekly change score  
16 between PGAC responders and non-responders as anchors, as well as comparisons of the  
17 changes in SOBDA weekly scores from baseline to the last week of treatment for PGAC,  
18 CGI-C, CRQ-SAS dyspnoea domain, and patient- and clinician-reported mMRC responders  
19 and non-responders, using ANCOVA adjusted for age, gender and baseline SOBDA weekly  
20 score. Cumulative distribution plots based on these anchors were also used to determine the  
21 MID.  
22  
23  
24  
25  
26  
27  
28  
29

30 Post-hoc supportive analyses using distribution-based approaches were also conducted  
31 after completion of the *a priori* specified anchor-based analyses to further supplement  
32 estimation of a responder threshold.  
33  
34  
35  
36

37 Responders by PGAC were defined as patients with a rating of 'better' or 'much better', and  
38 non-responders were defined as patients with a response of 'much worse,' 'worse' or 'no  
39 change', on their respective scales. Responders by CGI-C were defined as patients with a  
40 rating of 'better' or 'much better', and non-responders were defined as patients with a  
41 response of 'much worse,' 'worse' or 'no change'. A CRQ-SAS dyspnoea domain responder  
42 was defined as a patient with a score increase of 0.5 units or more between visit 2 and week  
43 6/early withdrawal, and a non-responder was defined as a patient who had a decrease in  
44 score, or an increase of less than 0.5 units. A responder by mMRC was defined as a patient  
45 who had a score decrease of 1 unit or more between visit 2 and week 6/early withdrawal,  
46 and a non-responder was defined as a patient who had the same score or an increase in  
47 score.  
48  
49  
50  
51  
52  
53  
54  
55  
56  
57  
58  
59  
60

## RESULTS

A total of 547 patients were screened and 418 completed both week -2 (screening visit 1) and week 0 (randomisation, visit 2) assessments; 52 patients were not eligible for randomisation. 366 patients met inclusion criteria and were randomised; however, one patient refused to take study medication, thus 365 patients received treatment and were included in the mITT (figure 1). Patients were predominantly white (90%), male (57%) with a mean age of 61.1 years (standard deviation, 9.7 years) and a mean body mass index of 28.3 kg/m<sup>2</sup> (table 1). The majority (62%) of patients were current smokers with an extensive smoking history (mean pack-years, 54.9). The mean post-salbutamol % predicted FEV<sub>1</sub> was 49.9%, indicative of a population with severe airflow obstruction.

A total of 29 patients withdrew from the study (FSC 9%; SAL 7%; placebo 8%), 13 because of an AE (FSC 5%; SAL 2%; placebo 4%).

### Reliability and validity

#### Internal consistency

Cronbach's alpha value for the SOBDA was 0.89 (n=344). Test-retest reliability was assessed between weeks 1 and 2 of the run-in period for the 152 patients reporting no change on the second weekly PGAC assessment: Pearson's correlation coefficients and ICC were both 0.94, with a mean difference between weeks 1 and 2 of 0.01 on the 4-point SOBDA scale.

#### Convergent validity

The relationship of SOBDA weekly scores to patient-reported and clinical assessments of dyspnoea severity or constructs hypothetically related to dyspnoea severity was examined to assess convergent validity. Spearman rank-order correlations between baseline SOBDA weekly scores and mMRC scores were 0.29 (patient-reported) and 0.24 (clinician-reported),

1  
2  
3 and was 0.24 for CGI-S. Pearson's correlation between baseline SOBDA weekly scores and  
4 the CRQ-SAS dyspnoea domain score was  $-0.68$  (higher scores in CRQ-SAS, contrary to  
5 SOBDA, indicate less dyspnoea, hence the correlation is negative).  
6  
7  
8  
9

### 10 Known-groups validity

11  
12 Known-groups validity was evaluated by determining the extent to which baseline SOBDA  
13 weekly scores differentiated between patients with varying levels of dyspnoea severity as  
14 rated on the patient- and clinician-reported mMRC and CGI-S collected at visit 2. Least-  
15 squares mean SOBDA weekly scores were increased as CGI-S and mMRC clinician/patient  
16 ratings increased (table 2).  
17  
18  
19  
20  
21  
22  
23

### 24 Responsiveness

25  
26  
27 SOBDA weekly scores were lower in PGAC responders than in non-responders, indicating  
28 less dyspnoea with daily activities. Differences between SOBDA weekly change scores for  
29 PGAC responders and non-responders were statistically significant for each weekly  
30 comparison with the exception of week 6 (table 3a).  
31  
32  
33  
34  
35

36 Changes in SOBDA weekly score between baseline and the last treatment week were  
37 statistically significantly larger for CGI-C and CRQ-SAS dyspnoea domain responders than  
38 for non-responders ( $p < 0.001$ ). This was not seen with the patient- or clinician-completed  
39 mMRC or PGAC defined responders, although changes in last treatment week SOBDA  
40 scores were numerically larger for responders versus non-responders (table 3b).  
41  
42  
43  
44  
45  
46  
47

### 48 Threshold for SOBDA responders and MID

49  
50 Patients classified as 'better' based on the CGI-C, CRQ-SAS dyspnoea domain (change of  
51  $>0$  to 0.5 units), or FEV<sub>1</sub> (change of  $>50$  to  $<100$  ml) had a mean change in SOBDA score of  
52  $-0.25$ ,  $-0.13$ , or  $-0.16$ , respectively, at the last treatment week compared with baseline.  
53  
54  
55  
56

57 Patients who rated their dyspnoea as 'better' on the PGAC assessments had a mean  
58  
59  
60

1  
2  
3 change in SOBDA score of -0.26 at week 1, -0.08 at weeks 2, 3 and 5, -0.10 at week 4,  
4  
5 and -0.05 at week 6.  
6  
7

## 8 **Exploratory efficacy analyses**

### 9 10 SOBDA treatment group differences

11  
12  
13  
14 After adjusting for age, sex, and SOBDA baseline score, the difference between FSC and  
15  
16 placebo was -0.09 (95% confidence interval [CI]: -0.23, 0.05) and between SAL and  
17  
18 placebo was 0.03 (95% CI: -0.11, 0.16).  
19  
20

### 21 CRQ-SAS

22  
23  
24 The greatest mean changes for dyspnoea and fatigue were observed in the FSC group (0.4  
25  
26 and 0.3, respectively). The mean changes from baseline in emotional function were similar  
27  
28 between placebo and the two treatment groups (0.2 and 0.1), as were those for mastery (0.2  
29  
30 for placebo, 0.3 for SAL, and 0.4 for FSC). SAL and FSC groups reported a change of  
31  
32 'better' or 'much better' (56% and 65%, respectively) compared with the placebo group  
33  
34 (53%). Thirty-four percent of patients receiving placebo were rated as responders, whereas  
35  
36 37% of SAL patients and 46% of FSC patients were responders.  
37  
38

### 39 Spirometry

40  
41  
42 The mean change in FEV<sub>1</sub> in the placebo, SAL, and FSC groups were 1 ml, 61 ml, and  
43  
44 138 ml, respectively. Forty-nine percent of patients receiving FSC were considered  
45  
46 responders, while 38% of patients receiving SAL and 25% of patients receiving placebo  
47  
48 were responders. The majority of patients in the FSC (62%) and SAL (55%) groups reported  
49  
50 a change of 'better' or 'much better', and less than half of patients in the placebo group  
51  
52 (38%) reported this change.  
53  
54  
55  
56  
57  
58  
59  
60

## Safety

AEs were reported for 37 patients (27%) in the FSC group, 34 patients (23%) in the SAL group, and 14 patients (19%) in the placebo group. COPD exacerbation, dyspnoea, headache, and respiratory tract infection were the most commonly reported AEs with no other individual AEs occurring in  $\geq 3\%$  of patients in any group.

Twelve patients experienced serious AEs (SAEs) (FSC, 3 [2%] patients; SAL, 5 [3%] patients; placebo, 4 [5%] patients); three of these SAEs were considered possibly related to study medication (SAL, 1 patient; placebo, 2 patients). One fatal SAE of respiratory failure occurred for a patient receiving FSC during the study, but was not considered related to FSC treatment by the study investigator.

## DISCUSSION

The SOBDA was developed to address the need for a robust and psychometrically sound patient-reported outcomes questionnaire for use in clinical research that would specifically capture dyspnoea experienced with daily activities as perceived by patients with COPD. Available questionnaires have limited assessment of psychometric properties, inconsistent clinical validity, and/or are not dyspnoea-specific. The CRQ-SAS<sup>8 10</sup> and SGRQ<sup>11 12</sup> questionnaires, for example, measure multiple dimensions that are much broader than dyspnoea with activity, which is the specific aim of the current SOBDA questionnaire. The mMRC questionnaire has been used to discriminate between levels of dyspnoea associated with exercise, but shows very limited response to change in clinical trials due to the limited number of categories for response.

This study confirms that the SOBDA questionnaire has sound psychometric properties. SOBDA weekly scores had an internal consistency reliability Cronbach's alpha value of 0.89, which surpassed the established threshold goal of  $>0.7$ .<sup>7</sup> SOBDA also had good test-retest

1  
2  
3 reliability (ICC=0.94), exceeding the threshold goal of >0.60, in patients reporting no change  
4  
5 in their breathlessness as measured by the PGAC.<sup>13</sup>  
6  
7

8 The convergent validity assessed through Spearman rank order correlations was  
9  
10 reasonable, although lower than expected for the CGI-C and mMRC. This may have been  
11  
12 due to the narrow range of responses given by clinicians: most patients were rated as '2' or  
13  
14 '3' by clinicians on both scales. The narrow range of clinician mMRC ratings reflect the  
15  
16 inclusion criteria requiring patients to have an mMRC  $\geq 2$  at study entry. The CRQ-SAS  
17  
18 dyspnoea scale, which measures the concept most similar to the SOBDA, showed the  
19  
20 highest correlation with the SOBDA questionnaire and is supportive of the SOBDA's  
21  
22 construct validity.  
23  
24

25 SOBDA weekly scores in the study population demonstrated good known-groups validity  
26  
27 through a series of analyses. The scores differentiated between dyspnoea severity as rated  
28  
29 by both clinicians and patients. As expected, discrimination based on patient ratings was  
30  
31 better than that based on clinician ratings. Known-groups validity was also confirmed when  
32  
33 comparing the SOBDA with the CGI-S.  
34  
35

36 Assessment of responsiveness of the SOBDA questionnaire was conducted independent of  
37  
38 treatment allocation. Good separation in SOBDA weekly scores was observed between the  
39  
40 PGAC groups at day 8 as indicated by significant differences between scores for responders  
41  
42 and non-responders. Less separation was observed between PGAC groups throughout the  
43  
44 later weeks of the 6-week treatment period compared with week 1. This is not an  
45  
46 unexpected trend as any improvement in dyspnoea would be expected to occur or be  
47  
48 perceptible to patients soon after initiating therapy, with continued improvement being less  
49  
50 noticeable over time. The particularly diminished responsiveness observed at week 6 was  
51  
52 potentially due to approximately half of the patients not providing a response to the PGAC at  
53  
54 day 43 or at the last visit. Changes from baseline in SOBDA last treatment week scores  
55  
56 were statistically significant between responders and non-responders using the CGI-C and  
57  
58  
59  
60

1  
2  
3 CRQ-SAS dyspnoea domain, but not the mMRC. This again may be due to the narrow range  
4  
5 of mMRC ratings.  
6

7  
8 The thresholds for SOBDA responders and the MID were explored using anchor- and  
9  
10 distribution-based methods. Anchor-based methods were used to establish a preliminary  
11  
12 MID range for SOBDA mean score changes within a patient, which would also be  
13  
14 considered as the threshold for SOBDA responders to allow comparison of proportions of  
15  
16 responders in different categories (e.g. different interventions or treatments). The evaluation  
17  
18 of data around the MID was based on the change from baseline in the SOBDA score for  
19  
20 those patients who endorsed or had the clinician endorse for them (depending on the  
21  
22 anchor), the response category 'better' for the global assessments or the pre-specified  
23  
24 grouping of meaningful improvement on other measures (PGAC, CGI-C, CRQ-SAS, and  
25  
26 FEV<sub>1</sub>). Based on these anchors, a preliminary response threshold for the SOBDA  
27  
28 questionnaire is a -0.1 to -0.2 score change. This is further supported by distribution-based  
29  
30 estimations of the MID. Similar thresholds of -0.14 and -0.21 were calculated using 0.2 and  
31  
32 0.3 times the standard deviation of the SOBDA scores at baseline, a method described by  
33  
34 Revicki and associates.<sup>14</sup> In addition, a similar threshold of -0.17 was identified by the  
35  
36 standard error of measurements method.<sup>15</sup> Thus, a threshold of -0.1 to -0.2 for the score  
37  
38 range of 1 to 4, supported by both anchor- and distribution-based methods, seems  
39  
40 reasonable at this stage of questionnaire development. This MID estimation is consistent in  
41  
42 scale with that of the CRQ-SAS in which the MID is 0.5 on a 7-point Likert scale.<sup>16</sup>  
43  
44

45  
46 Once an estimation of the MID was determined, exploratory analysis by treatment group was  
47  
48 conducted which suggests that the proportion of patients crossing the -0.1 and -0.2  
49  
50 thresholds was numerically greater for the SAL group compared with placebo, and  
51  
52 numerically greater for the FSC group compared with the SAL group. As the study was  
53  
54 designed only to validate the SOBDA, and cannot reliably demonstrate differences between  
55  
56 treatment groups, these changes from baseline in SOBDA weekly score at last treatment  
57  
58 can only be regarded as exploratory. Even after adjusting for age, gender, and baseline  
59  
60

1  
2  
3 SOBDA weekly score, each treatment group when compared with placebo did not meet the  
4  
5 MID of  $-0.1$  or  $-0.2$ .  
6

7  
8 This study had some limitations. Only patients with mMRC  $\geq 2$  were included in the study,  
9  
10 which restricted the ranges of the dyspnoea severity. The effects of exacerbation and  
11  
12 possible cultural differences on the study results were not evaluated. Finally, approximately  
13  
14 half of the patients did not answer the last PGAC question. These limitations could have had  
15  
16 effect on some of the results of our study, although we do not feel that there would be any  
17  
18 change to the overall conclusions.  
19

20  
21 In summary, this study demonstrates that the 13-item SOBDA questionnaire is reliable, valid,  
22  
23 and responsive to change in patients with COPD. At this stage of questionnaire  
24  
25 development, a change score of  $-0.1$  to  $-0.2$  is the most appropriate estimation for  
26  
27 determining a threshold for treatment response. A specific value will be identified as more  
28  
29 data is generated from future clinical trials.  
30

## 31 32 **ACKNOWLEDGEMENTS**

33  
34  
35 Editorial support in the form of copyediting, editorial suggestions to draft versions of this  
36  
37 paper, assembling tables and figures, collating author comments, fact checking, referencing,  
38  
39 and graphic services was provided by Tara N Miller, PhD (Lyndhurst, NJ, USA), David  
40  
41 Cutler, PhD and Lisa Moore, PhD (Macclesfield, UK) at Gardiner-Caldwell Communications.  
42  
43 This support was funded by GlaxoSmithKline.  
44  
45

## 46 47 **CONTRIBUTORS**

48  
49 All authors contributed to drafting the article or revising it critically for important intellectual  
50  
51 content, and all approved the final version to be published. MLW, TKW, MT, JMB and CC  
52  
53 contributed to conception and design of the study, acquisition of data and analysis and  
54  
55 interpretation of data. JFD, AA and W-HC contributed to acquisition of data and analysis and  
56  
57 interpretation of data. MLW attests that the authors had access to all the study data, takes  
58  
59  
60



responsibility for the accuracy of the analysis, and had authority over manuscript preparation and the decision to submit the manuscript for publication.

## COMPETING INTERESTS

**Michael L Watkins, Maggie Tabberer, Jean M Brooks, and Courtney Crim** are employees of, and own stock in, GlaxoSmithKline. **Teresa K Wilcox** and **Wen-Hung Chen** are employees of the United BioSource Corporation. Funding to conduct the study, data analysis and interpretation, and generation of the study report was provided to United BioSource Corporation by GlaxoSmithKline. **James F Donohue** has served as consultant to Ammirall, AstraZeneca, Boehringer Ingelheim, Dey, Elevation Pharmaceuticals, Forest Laboratories, GlaxoSmithKline, Novartis, Pearl Pharmaceuticals, Pfizer and Sunovion; and has received research grants from Boehringer Ingelheim, GlaxoSmithKline and Novartis.

**Antonio Anzueto** is an advisor, consultant, and speaker for Boehringer Ingelheim, GlaxoSmithKline, Pfizer, Merck, Bayer-Schering Pharma, Dey Pharma, Forest Laboratories and has investigational grants with the US National Heart, Lung, and Blood Institute, GlaxoSmithKline, Lilly, Pfizer, and Pneuma Pharmaceuticals.

## FUNDING

The SOBDA development programme, including this ASQ112989 study, was funded by GlaxoSmithKline. GlaxoSmithKline and United BioSource Corporation developed the instrument. GlaxoSmithKline had a role in study design, data collection and analyses, decision to publish, and preparation of all study reporting including this manuscript.

## DATA SHARING

No unpublished data are available

## REFERENCES

1. Wilcox TK, Chen W-H, Howard KA, et al. Item selection, reliability and validity of the Shortness of Breath with Daily Activities (SOBDA) questionnaire: a new outcome measure for evaluating dyspnoea in COPD. (Submitted 2013).
2. Rennard S, Decramer M, Calverley PM, et al. Impact of COPD in North America and Europe in 2000: subjects' perspective of Confronting COPD International Survey. *Eur Respir J* 2002;**20**:799–805.
3. Howard K, Berry P, Petrillo J, et al. Development of the shortness of breath with daily activities questionnaire (SOBDA). *Value in Health* 2012;**15**:1042–50.
4. Food and Drug Administration. Guidance for industry on patient-reported outcome measures: use in medical product development to support labeling claims. 2009. <http://www.fda.gov/downloads/Drugs/Guidances/UCM193282.pdf> (accessed 4 Apr 2013).
5. Celli BR, MacNee W, ATS/ERS Task Force. Standards for the diagnosis and treatment of patients with COPD: a summary of the ATS/ERS position paper. *Eur Respir J* 2004;**23**:932–46.
6. Hankinson JL, Odencrantz JR, Fedan KB. Spirometric reference values from a sample of the general US population. *Am J Resp Crit Care Med* 1999;**159**:179–87.
7. Nunnally JC, Bernstein IH. *Psychometric Theory*. 3rd ed. New York: McGraw-Hill, Inc.; 1994.
8. Aaron SD, Vandemheen KL, Clinch JJ, et al. Measurement of short-term changes in dyspnoea and disease-specific quality of life following an acute COPD exacerbation. *Chest* 2002;**121**:688–96.

- 1  
2  
3 9. Aaron SD, Vandemheen KL, Hebert P, et al. Outpatient oral prednisone after  
4 emergency treatment of chronic obstructive pulmonary disease. *N Engl J Med*  
5 2003;**348**:2618–25.  
6  
7  
8
- 9  
10 10. Parker CM, Voduc N, Aaron SD, et al. Physiological changes during symptom  
11 recovery from moderate exacerbations of COPD. *Eur Respir J* 2005;**26**:420–8.  
12  
13
- 14 11. Jones PW, Quirk FH, Baveystock CM. The St George's Respiratory Questionnaire.  
15 *Respir Med* 1991;**85**(Suppl. B):2531.  
16  
17  
18
- 19 12. Jones PW, Quirk FH, Baveystock CM, et al. A self-complete measure of health status  
20 for chronic airflow limitation. The St George's Respiratory Questionnaire. *Ann Rev*  
21 *Respir Dis* 1992;**145**:1321–7.  
22  
23  
24  
25  
26
- 27 13. Hays R, Anderson R, Revicki DA. Assessing reliability and validity of measurement in  
28 clinical trials. In: Staquet MJ, Hays RD, Fayers PM, eds. *Quality of life assessment in*  
29 *clinical trials*. New York, NY: Oxford University Press, 1998.167–182.  
30  
31  
32  
33
- 34 14. Revicki DA, Cella D, Hays RD, et al. Responsiveness and minimal important  
35 differences for patient reported outcomes. *Health Qual Life Outcomes* 2006;**4**:70.  
36  
37  
38
- 39 15. Wyrwich K, Tierney W, Wolinsky F. Further evidence supporting a SEM-based  
40 criterion for identifying meaningful intra-individual changes in health-related quality of  
41 life. *J Clin Epidemiol* 1999;**52**:861–73.  
42  
43  
44  
45
- 46 16. Schunemann HJ, Puhan M, Goldstein R, et al. Measurement properties and  
47 interpretability of the chronic respiratory disease questionnaire (CRQ). *COPD*  
48 2005;**2**:81–9.  
49  
50  
51  
52  
53  
54  
55  
56  
57  
58  
59  
60

## TABLES AND FIGURES

**Table 1.** Demographic and clinical characteristics

|                                                            | Not Randomised | Placebo     | FSC 250/50 µg | SAL 50 µg   | Total       |
|------------------------------------------------------------|----------------|-------------|---------------|-------------|-------------|
| N                                                          | 52             | 75          | 139           | 152         | 418         |
| Age, year (mean [SD])                                      | 63.8 (9.6)     | 62.8 (9.8)  | 60.2 (9.5)    | 60.1 (9.6)  | 61.1 (9.7)  |
| Male, n (%)                                                | 25 (48)        | 46 (61)     | 79 (57)       | 89 (59)     | 239 (57)    |
| White, n (%)                                               | 44 (85)        | 65 (87)     | 127 (91)      | 140 (92)    | 376 (90)    |
| Current smoker, n (%)                                      | 29 (57)        | 46 (61)     | 84 (60)       | 99 (65)     | 258 (62)    |
| Body mass index, mean (SD)                                 | 28.3 (6.9)     | 26.6 (6.1)  | 29.0 (7.3)    | 28.5 (6.2)  | 28.3 (6.7)  |
| Post-bronchodilator FEV <sub>1</sub> % predicted mean (SD) | 50.3 (15.1)    | 49.4 (13.1) | 49.5 (13.7)   | 50.2 (13.8) | 49.9 (13.8) |
| FEV <sub>1</sub> /FVC % (mean [SD])                        | 55.7 (35.2)    | 51.6 (11.4) | 53.7 (11.4)   | 52.2 (10.9) | 53.0 (16.1) |
| % Reversibility (mean [SD])                                | 8.6 (14.4)     | 16.7 (19.2) | 14.5 (18.5)   | 11.7 (13.9) | 13.1 (16.8) |

NOTE: 'Not randomised' column reflects those patients who completed visit 1 and 2 assessments but were not eligible to be randomised.

'Total' column reflects the run-in population, defined as patients who completed visits 1 and 2 including those who were not randomised.

FEV<sub>1</sub>, forced expiratory volume in 1 s; FSC, fluticasone propionate/salmeterol combination; FVC, forced vital capacity; SAL = salmeterol;

SD, standard deviation.

**Table 2.** Known groups validity: least-squares mean baseline SOBDA weekly score by mMRC and CGI-S response categories at visit 2

| Response categories | Patient-completed mMRC<br>n, LS mean (SE) | Clinician-completed mMRC<br>n, LS mean (SE) | CGI-S<br>n, LS mean (SE) |
|---------------------|-------------------------------------------|---------------------------------------------|--------------------------|
| 0                   | n=12<br>1.92 (0.19)                       | --                                          | --                       |
| 0-1                 | --                                        | n=12<br>1.78 (0.20)                         | --                       |
| 1                   | n=103<br>1.94 (0.07)                      | --                                          | n=19<br>1.87 (0.16)      |
| 2                   | n=138<br>2.20 (0.06)                      | n=200<br>2.08 (0.05)                        | n=236<br>2.11 (0.05)     |
| 3                   | n=65<br>2.26 (0.08)                       | n=117<br>2.28 (0.06)                        | n=78<br>2.33 (0.08)      |
| 4                   | n=22<br>2.73 (0.14)                       | n=10<br>2.73 (0.22)                         | n=5<br>2.72 (0.31)       |

NOTE: Due to the small number of 0 and 1 responses in the clinician-completed mMRC, these two categories were combined.

SOBDA, Shortness of Breath with Daily Activities; mMRC, modified Medical Research Council dyspnoea rating scale; CGI-S, Clinician Global Impression of Dyspnoea Severity; SE, standard error.

1  
2  
3  
4  
5  
6  
7  
8  
9  
10  
11  
12  
13  
14  
15  
16  
17  
18  
19  
20  
21  
22  
23  
24  
25  
26  
27  
28  
29  
30  
31  
32  
33  
34  
35  
36  
37  
38  
39  
40  
41  
42  
43  
44  
45  
46  
47  
48  
49

**Table 3** (A) Change in SOBDA weekly score by PGAC responders; (B) Change in SOBDA last treatment week score by assessment responders at visit 3

**A)**

|                                            | <b>Day 8</b>         | <b>Day 15</b>        | <b>Day 22</b>        | <b>Day 29</b>        | <b>Day 36</b>        | <b>Day 43</b>         |
|--------------------------------------------|----------------------|----------------------|----------------------|----------------------|----------------------|-----------------------|
| PGAC responders (n)                        | 105                  | 91                   | 83                   | 62                   | 77                   | 31                    |
| PGAC non-responders (n)                    | 188                  | 212                  | 216                  | 223                  | 200                  | 88                    |
| LS mean difference between groups (95% CI) | 0.24<br>(0.18, 0.31) | 0.12<br>(0.06, 0.19) | 0.11<br>(0.06, 0.16) | 0.11<br>(0.06, 0.17) | 0.13<br>(0.08, 0.18) | 0.06<br>(-0.03, 0.15) |
| p value*                                   | <0.001               | <0.001               | <0.001               | <0.001               | <0.001               | NS                    |

\* Comparison of SOBDA scores (non-responders minus responders) based on analysis of covariance adjusted for age, gender and previous week's SOBDA score.

CI, confidence interval; LS, least squares; NS, not significant; PGAC, Patient Global Assessment of Change; SOBDA, Shortness of Breath with Daily Activities

B)

|                                   | CGI-C        | CRQ-SAS<br>dyspnoea domain | Clinician-completed<br>mMRC | Patient-completed<br>mMRC | PGAC          |
|-----------------------------------|--------------|----------------------------|-----------------------------|---------------------------|---------------|
| Responders (n)                    | 120          | 117                        | 91                          | 92                        | 45            |
| Non-responders (n)                | 181          | 184                        | 210                         | 209                       | 106           |
| LS mean difference between groups | 0.24         | 0.30                       | 0.03                        | 0.08                      | 0.08          |
| (95% CI)                          | (0.14, 0.34) | (0.21, 0.40)               | (-0.08, 0.15)               | (-0.02, 0.19)             | (-0.07, 0.23) |
| p value*                          | <0.001       | <0.001                     | NS                          | NS                        | NS            |

\* Comparison of SOBDA scores (non-responders minus responders) based on Analysis of Covariance adjusted for age, gender and baseline SOBDA weekly score.

CGI-C, Clinician Global Impression of Change; CRQ-SAS, Chronic Respiratory Disease Questionnaire self-administered standardised version; CI, confidence interval; mMRC, modified Medical Research Council; LS, least squares; NS, not significant; PGAC, Patient Global Assessment of Change; SOBDA, Shortness of Breath with Daily Activities

1  
2  
3 **Box 1.** 13-Item SOBDA questionnaire  
4  
5  
6

7 **Figure 1.** Patient disposition  
8  
9

10 \*Patients who completed visits 1 and 2 including those not randomised.  
11

12 †Patients randomised to treatment and received at least one dose of the study drug. One additional  
13 patient was randomised but not treated.  
14

15 BID, twice daily; FSC, fluticasone propionate/salmeterol combination; mITT, modified intent-to-treat;  
16 SAL, salmeterol.  
17  
18  
19  
20  
21  
22  
23  
24  
25  
26  
27  
28  
29  
30  
31  
32  
33  
34  
35  
36  
37  
38  
39  
40  
41  
42  
43  
44  
45  
46  
47  
48  
49  
50  
51  
52  
53  
54  
55  
56  
57  
58  
59  
60



**How short of breath were you when:**

- you put on long pants or stockings?
- you put on your shoes (sandals)?
- you when you washed yourself?
- you reached above your head to put things away?
- you cleaned or fixed something at floor level?
- you put things away in the cupboard or shelf at chest level?
- you put things away in the cupboard or shelf at knee level?
- you prepared food or a meal?
- you picked up light objects off the floor?
- you carried objects at your side like bags or baskets?
- you walked at a slow pace?
- you walked up 3 stairs?
- you walked up 8 stairs?

**Response options included:**

- I did not do the activity today
- Not at all
- Slightly
- Moderately
- Severely
- So severely that I did not do the activity today

216x258mm (150 x 150 DPI)

1  
2  
3  
4  
5  
6  
7  
8  
9  
10  
11  
12  
13  
14  
15  
16  
17  
18  
19  
20  
21  
22  
23  
24  
25  
26  
27  
28  
29  
30  
31  
32  
33  
34  
35  
36  
37  
38  
39  
40  
41  
42  
43  
44  
45  
46  
47  
48  
49  
50  
51  
52  
53  
54  
55  
56  
57  
58  
59  
60

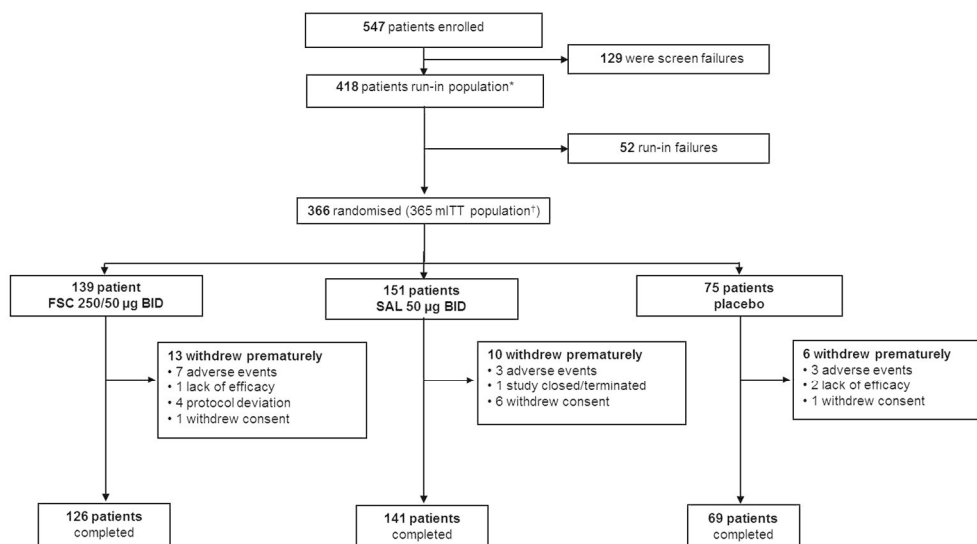

266x160mm (150 x 150 DPI)

review only



## CONSORT 2010 checklist of information to include when reporting a randomised trial\*

| Section/Topic                    | Item No | Checklist item                                                                                                                                                                              | Reported on page No |
|----------------------------------|---------|---------------------------------------------------------------------------------------------------------------------------------------------------------------------------------------------|---------------------|
| <b>Title and abstract</b>        |         |                                                                                                                                                                                             |                     |
|                                  | 1a      | Identification as a randomised trial in the title                                                                                                                                           | –                   |
|                                  | 1b      | Structured summary of trial design, methods, results, and conclusions (for specific guidance see CONSORT for abstracts)                                                                     | 2, 3                |
| <b>Introduction</b>              |         |                                                                                                                                                                                             |                     |
| Background and objectives        | 2a      | Scientific background and explanation of rationale                                                                                                                                          | 6, 7                |
|                                  | 2b      | Specific objectives or hypotheses                                                                                                                                                           | 7                   |
| <b>Methods</b>                   |         |                                                                                                                                                                                             |                     |
| Trial design                     | 3a      | Description of trial design (such as parallel, factorial) including allocation ratio                                                                                                        | 7                   |
|                                  | 3b      | Important changes to methods after trial commencement (such as eligibility criteria), with reasons                                                                                          | –                   |
| Participants                     | 4a      | Eligibility criteria for participants                                                                                                                                                       | 7                   |
|                                  | 4b      | Settings and locations where the data were collected                                                                                                                                        | 7                   |
| Interventions                    | 5       | The interventions for each group with sufficient details to allow replication, including how and when they were actually administered                                                       | 8                   |
| Outcomes                         | 6a      | Completely defined pre-specified primary and secondary outcome measures, including how and when they were assessed                                                                          | 8–12                |
|                                  | 6b      | Any changes to trial outcomes after the trial commenced, with reasons                                                                                                                       | –                   |
| Sample size                      | 7a      | How sample size was determined                                                                                                                                                              | 10                  |
|                                  | 7b      | When applicable, explanation of any interim analyses and stopping guidelines                                                                                                                | –                   |
| <b>Randomisation:</b>            |         |                                                                                                                                                                                             |                     |
| Sequence generation              | 8a      | Method used to generate the random allocation sequence                                                                                                                                      | 10                  |
|                                  | 8b      | Type of randomisation; details of any restriction (such as blocking and block size)                                                                                                         | 10                  |
| Allocation concealment mechanism | 9       | Mechanism used to implement the random allocation sequence (such as sequentially numbered containers), describing any steps taken to conceal the sequence until interventions were assigned | –                   |
| Implementation                   | 10      | Who generated the random allocation sequence, who enrolled participants, and who assigned participants to interventions                                                                     | 10                  |
| Blinding                         | 11a     | If done, who was blinded after assignment to interventions (for example, participants, care providers, those                                                                                | –                   |

|    |                          |                                                                                                                     |           |
|----|--------------------------|---------------------------------------------------------------------------------------------------------------------|-----------|
| 1  |                          |                                                                                                                     |           |
| 2  |                          | assessing outcomes) and how                                                                                         | 8         |
| 3  |                          |                                                                                                                     |           |
| 4  |                          | 11b If relevant, description of the similarity of interventions                                                     | –         |
| 5  | Statistical methods      | 12a Statistical methods used to compare groups for primary and secondary outcomes                                   | 10–12     |
| 6  |                          | 12b Methods for additional analyses, such as subgroup analyses and adjusted analyses                                | –         |
| 7  |                          |                                                                                                                     |           |
| 8  | <b>Results</b>           |                                                                                                                     |           |
| 9  | Participant flow (a      | 13a For each group, the numbers of participants who were randomly assigned, received intended treatment, and        |           |
| 10 | diagram is strongly      | were analysed for the primary outcome                                                                               | 13, Fig 1 |
| 11 | recommended)             | 13b For each group, losses and exclusions after randomisation, together with reasons                                | 13, Fig 1 |
| 12 | Recruitment              | 14a Dates defining the periods of recruitment and follow-up                                                         | 7–8       |
| 13 |                          | 14b Why the trial ended or was stopped                                                                              | –         |
| 14 |                          |                                                                                                                     |           |
| 15 | Baseline data            | 15 A table showing baseline demographic and clinical characteristics for each group                                 | Table 1   |
| 16 | Numbers analysed         | 16 For each group, number of participants (denominator) included in each analysis and whether the analysis was      |           |
| 17 |                          | by original assigned groups                                                                                         | 13, Fig 1 |
| 18 |                          |                                                                                                                     |           |
| 19 | Outcomes and             | 17a For each primary and secondary outcome, results for each group, and the estimated effect size and its           |           |
| 20 | estimation               | precision (such as 95% confidence interval)                                                                         | 13–16     |
| 21 |                          | 17b For binary outcomes, presentation of both absolute and relative effect sizes is recommended                     | –         |
| 22 | Ancillary analyses       | 18 Results of any other analyses performed, including subgroup analyses and adjusted analyses, distinguishing       |           |
| 23 |                          | pre-specified from exploratory                                                                                      | –         |
| 24 |                          |                                                                                                                     |           |
| 25 | Harms                    | 19 All important harms or unintended effects in each group (for specific guidance see CONSORT for harms)            | 16        |
| 26 |                          |                                                                                                                     |           |
| 27 | <b>Discussion</b>        |                                                                                                                     |           |
| 28 | Limitations              | 20 Trial limitations, addressing sources of potential bias, imprecision, and, if relevant, multiplicity of analyses | 19        |
| 29 | Generalisability         | 21 Generalisability (external validity, applicability) of the trial findings                                        | 16–19     |
| 30 | Interpretation           | 22 Interpretation consistent with results, balancing benefits and harms, and considering other relevant evidence    | 16–19     |
| 31 |                          |                                                                                                                     |           |
| 32 | <b>Other information</b> |                                                                                                                     |           |
| 33 | Registration             | 23 Registration number and name of trial registry                                                                   | Abstract  |
| 34 | Protocol                 | 24 Where the full trial protocol can be accessed, if available                                                      | –         |
| 35 | Funding                  | 25 Sources of funding and other support (such as supply of drugs), role of funders                                  | 19, 20    |
| 36 |                          |                                                                                                                     |           |

\*We strongly recommend reading this statement in conjunction with the CONSORT 2010 Explanation and Elaboration for important clarifications on all the items. If relevant, we also recommend reading CONSORT extensions for cluster randomised trials, non-inferiority and equivalence trials, non-pharmacological treatments, herbal interventions, and pragmatic trials. Additional extensions are forthcoming: for those and for up to date references relevant to this checklist, see [www.consort-statement.org](http://www.consort-statement.org).

CONFIDENTIAL

The GlaxoSmithKline group of companies

ASQ112989

**Division:** Worldwide Development**Information Type:** Clinical Study Report**Control:** Placebo

|               |                                                                                                                                                |
|---------------|------------------------------------------------------------------------------------------------------------------------------------------------|
| <b>Title:</b> | ASQ112989: Validation of a New Shortness of Breath with Daily Activities Questionnaire in patients with Chronic Obstructive Pulmonary Disease. |
|---------------|------------------------------------------------------------------------------------------------------------------------------------------------|

**Phase:** IV**Compound Number:** CCI18781+GR33343**Effective Date:** 10-OCT-2011**Subject:** COPD, Dyspnea, shortness of breath, questionnaire, ADVAIR DISKUS™**Author(s):** [REDACTED]

Indication Studied: COPD

**Clinical Study Report Revision History**

Initiation Date: 29 Oct 2009

Completion Date: 01 Jul 2010 (date of last data entered into database)

Early Termination Date: NA

Date of Report: 10 Oct 2011

**Sponsor Signatory:**  
(and Medical Officer)[REDACTED]  
Director, Clinical Respiratory Medicine Development  
Center, GlaxoSmithKline

This study was performed in compliance with Good Clinical Practices and GlaxoSmithKline Standard Operating Procedures for all processes involved, including the archiving of essential documents.

Copyright 2011 the GlaxoSmithKline group of companies. All rights reserved.  
Unauthorized copying or use of this information is prohibited.

## Table of Contents

|                                                                              | Page |
|------------------------------------------------------------------------------|------|
| TITLE PAGE .....                                                             | 1    |
| ABBREVIATIONS .....                                                          | 12   |
| ETHICS AND GOOD CLINICAL PRACTICE .....                                      | 14   |
| 1. INTRODUCTION .....                                                        | 15   |
| 1.1. Background .....                                                        | 15   |
| 1.2. Rationale .....                                                         | 15   |
| 2. STUDY OBJECTIVES .....                                                    | 16   |
| 3. INVESTIGATORS AND STUDY ADMINISTRATIVE STRUCTURE .....                    | 17   |
| 4. INVESTIGATIONAL PLAN .....                                                | 18   |
| 4.1. Study Design .....                                                      | 18   |
| 4.2. Discussion of Study Design .....                                        | 18   |
| 4.3. Protocol Amendment(s) .....                                             | 18   |
| 4.4. Selection of Study Population .....                                     | 19   |
| 4.4.1. Inclusion/Exclusion Criteria .....                                    | 19   |
| 4.4.2. Randomization Criteria .....                                          | 20   |
| 4.4.3. Withdrawal Criteria .....                                             | 20   |
| 4.5. Treatments .....                                                        | 20   |
| 4.5.1. Investigational Product and Reference Therapy .....                   | 21   |
| 4.5.2. Treatment Assignment .....                                            | 21   |
| 4.5.3. Blinding .....                                                        | 22   |
| 4.5.4. Prior and Concomitant Medications and Non-Drug Therapies .....        | 22   |
| 4.5.5. Treatment Compliance .....                                            | 22   |
| 4.6. Compliance with SOBDA Diary Completion .....                            | 23   |
| 4.7. Study Assessments and Procedures .....                                  | 23   |
| 4.7.1. Questionnaire Validation and Healthcare Utilization Assessments ..... | 23   |
| 4.7.2. Safety Assessments .....                                              | 24   |
| 4.8. Data Quality Assurance .....                                            | 24   |
| 4.9. Statistical Analyses .....                                              | 24   |
| 4.9.1. Timings of Planned Analyses .....                                     | 24   |
| 4.9.2. Sample Size Considerations .....                                      | 24   |
| 4.9.3. Analysis Populations .....                                            | 25   |
| 4.9.4. Comparisons of Interest .....                                         | 26   |
| 4.9.5. General Considerations for Data Analyses .....                        | 27   |
| 4.9.6. Multicentre Studies .....                                             | 27   |
| 4.9.7. Other Strata and Covariates .....                                     | 27   |
| 4.9.8. Examination of Subgroups .....                                        | 27   |
| 4.9.9. Multiple Comparisons and Multiplicity .....                           | 27   |
| 4.9.10. Data Handling Conventions .....                                      | 27   |
| 4.9.11. Study Population .....                                               | 27   |
| 4.9.12. Assessment of Measurement Properties .....                           | 27   |
| 4.9.13. Exploratory Efficacy Analyses .....                                  | 27   |
| 4.9.14. Safety Analyses .....                                                | 27   |
| 5. STUDY POPULATION RESULTS .....                                            | 28   |

|    |                                                                                                    |    |
|----|----------------------------------------------------------------------------------------------------|----|
| 1  |                                                                                                    |    |
| 2  |                                                                                                    |    |
| 3  |                                                                                                    |    |
| 4  | 5.1. Subject Disposition .....                                                                     | 28 |
| 5  | 5.1.1. Screen and Run-in Failures .....                                                            | 28 |
| 6  | 5.1.2. Randomized Subjects .....                                                                   | 29 |
| 7  | 5.2. Protocol Deviations .....                                                                     | 29 |
| 8  | 5.3. Populations Analyzed .....                                                                    | 30 |
| 9  | 5.4. Demographics and Baseline Characteristics .....                                               | 30 |
| 10 | 5.4.1. Current Medical Conditions .....                                                            | 31 |
| 11 | 5.4.2. Past Medical Conditions .....                                                               | 31 |
| 12 | 5.4.3. COPD History and Exacerbation History .....                                                 | 31 |
| 13 | 5.4.4. Smoking History .....                                                                       | 32 |
| 14 | 5.4.5. Lung Function .....                                                                         | 32 |
| 15 | 5.5. Prior and Concomitant Medications .....                                                       | 32 |
| 16 | 5.5.1. COPD Medications .....                                                                      | 32 |
| 17 | 5.6. Exposure and Treatment Compliance .....                                                       | 33 |
| 18 | 6. ASSESSMENT OF MEASUREMENT PROPERTIES .....                                                      | 34 |
| 19 | 6.1. Reliability .....                                                                             | 34 |
| 20 | 6.1.1. Internal Consistency .....                                                                  | 34 |
| 21 | 6.1.2. Test-retest Reliability .....                                                               | 34 |
| 22 | 6.2. Validity .....                                                                                | 35 |
| 23 | 6.2.1. Convergent Validity .....                                                                   | 35 |
| 24 | 6.2.2. Known Group Validity .....                                                                  | 36 |
| 25 | 6.3. Responsiveness .....                                                                          | 36 |
| 26 | 6.3.1. SOBDA Weekly Score Analysis by Patient Global Assessment of<br>Change .....                 | 36 |
| 27 | 6.3.2. SOBDA Last Treatment Week Score Analysis .....                                              | 37 |
| 28 | 6.4. Threshold for SOBDA Responders and Minimally Important Difference .....                       | 38 |
| 29 | 6.4.1. SOBDA Weekly Scores .....                                                                   | 38 |
| 30 | 6.4.2. SOBDA Last Treatment Week Score .....                                                       | 39 |
| 31 | 7. EXPLORATORY EFFICACY .....                                                                      | 39 |
| 32 | 7.1. Threshold for SOBDA Responders and Minimally Important Difference by<br>Treatment Group ..... | 39 |
| 33 | 7.2. SOBDA Diary .....                                                                             | 40 |
| 34 | 7.3. Rescue Medication Use .....                                                                   | 40 |
| 35 | 7.4. Rescue-Free Days .....                                                                        | 40 |
| 36 | 7.5. Global Assessment of Shortness of Breath .....                                                | 41 |
| 37 | 7.6. Patient Global Assessment of Change .....                                                     | 41 |
| 38 | 7.7. Summary of patient exit evaluation .....                                                      | 41 |
| 39 | 7.8. Lung Function .....                                                                           | 41 |
| 40 | 7.9. CRQ-SAS Domain Scores .....                                                                   | 42 |
| 41 | 7.10. Clinician Global Impression of Change .....                                                  | 42 |
| 42 | 7.11. Patient-completed Dyspnea Scale .....                                                        | 42 |
| 43 | 7.12. Clinician-completed mMRC Dyspnea Scale .....                                                 | 43 |
| 44 | 8. HEALTHCARE UTILIZATION .....                                                                    | 44 |
| 45 | 8.1. Summary of Healthcare Provider Contacts via Electronic Daily Diary .....                      | 44 |
| 46 | 8.2. Healthcare Utilization during Run-in .....                                                    | 44 |
| 47 | 8.3. Healthcare Utilization during Treatment .....                                                 | 45 |
| 48 |                                                                                                    |    |
| 49 |                                                                                                    |    |
| 50 |                                                                                                    |    |
| 51 |                                                                                                    |    |
| 52 |                                                                                                    |    |
| 53 |                                                                                                    |    |
| 54 |                                                                                                    |    |
| 55 |                                                                                                    |    |
| 56 |                                                                                                    |    |
| 57 |                                                                                                    |    |
| 58 |                                                                                                    |    |
| 59 |                                                                                                    |    |
| 60 |                                                                                                    |    |

|    |                                                                                  |    |
|----|----------------------------------------------------------------------------------|----|
| 1  |                                                                                  |    |
| 2  |                                                                                  |    |
| 3  |                                                                                  |    |
| 4  | 9. SAFETY RESULTS .....                                                          | 46 |
| 5  | 9.1. Adverse Events .....                                                        | 46 |
| 6  | 9.1.1. Adverse Event Overview .....                                              | 46 |
| 7  | 9.1.2. On-Treatment Adverse Events .....                                         | 46 |
| 8  | 9.1.3. Post-Treatment Adverse Events .....                                       | 47 |
| 9  | 9.1.4. Drug-related Adverse Events on Treatment.....                             | 47 |
| 10 | 9.2. Serious and Other Significant Adverse Events .....                          | 47 |
| 11 | 9.2.1. SAEs prior to treatment .....                                             | 47 |
| 12 | 9.2.2. SAEs during treatment.....                                                | 48 |
| 13 | 9.2.3. SAEs after treatment .....                                                | 48 |
| 14 | 9.2.4. Deaths .....                                                              | 48 |
| 15 | 9.2.5. Other Significant Adverse Events .....                                    | 48 |
| 16 | 9.3. Electrocardiograms .....                                                    | 49 |
| 17 | 9.4. Vital Signs .....                                                           | 50 |
| 18 | 9.5. Pregnancies .....                                                           | 50 |
| 19 | 10. DISCUSSION AND CONCLUSIONS.....                                              | 51 |
| 20 | 10.1. Discussion .....                                                           | 51 |
| 21 | 10.2. Conclusions .....                                                          | 53 |
| 22 | 11. REFERENCES .....                                                             | 55 |
| 23 | 12. CASE NARRATIVES .....                                                        | 57 |
| 24 | 12.1. Serious Adverse Events .....                                               | 57 |
| 25 | 12.2. Adverse Events Leading to Withdrawal.....                                  | 69 |
| 26 | STUDY POPULATION DATA SOURCE TABLES.....                                         | 75 |
| 27 | Table 1.01 Summary of Study Populations (All Subjects Enrolled Population) ..... | 75 |
| 28 | Table 1.02 Summary of Attendance at Each Clinic Visit (All Subjects Enrolled     |    |
| 29 | Population) .....                                                                | 76 |
| 30 | Table 1.03 Summary of Screen Failures (All Subjects Enrolled Population) .....   | 77 |
| 31 | Table 1.04 Summary of Run-In Failures (Run-in Population).....                   | 78 |
| 32 | Table 1.05 Summary of Subject Disposition (Modified Intent-to-treat              |    |
| 33 | Population) .....                                                                | 79 |
| 34 | Table 1.06 Summary of Number of Subjects by Centre (All Subjects Enrolled        |    |
| 35 | Population) .....                                                                | 80 |
| 36 | Table 1.07 Summary of Inclusion/Exclusion/Randomisation Criteria Deviations      |    |
| 37 | for Screen or Run-In Failures (All Subjects Enrolled Population) .....           | 82 |
| 38 | Table 1.08 Summary of Inclusion/Exclusion/Randomisation Criteria Deviations      |    |
| 39 | (Modified Intent-to-treat Population) .....                                      | 83 |
| 40 | Table 1.09 Summary of Protocol Deviations (Modified Intent-to-treat              |    |
| 41 | Population) .....                                                                | 84 |
| 42 | Table 1.10 Summary of Demographic Characteristics (Run-in Population) .....      | 85 |
| 43 | Table 1.11 Summary of Race and Racial Combinations (Run-in Population) .....     | 87 |
| 44 | Table 1.12 Summary of Race and Racial Combination Details (Run-in                |    |
| 45 | Population) .....                                                                | 88 |
| 46 | Table 1.13 Summary of Current Medical Conditions (Run-in Population) .....       | 89 |
| 47 | Table 1.14 Summary of Past Medical Conditions (Run-in Population) .....          | 90 |
| 48 | Table 1.15 Summary of COPD History (Run-in Population).....                      | 91 |
| 49 | Table 1.16 Summary of COPD Exacerbation History (Run-in Population) .....        | 92 |
| 50 |                                                                                  |    |
| 51 |                                                                                  |    |
| 52 |                                                                                  |    |
| 53 |                                                                                  |    |
| 54 |                                                                                  |    |
| 55 |                                                                                  |    |
| 56 |                                                                                  |    |
| 57 |                                                                                  |    |
| 58 |                                                                                  |    |
| 59 |                                                                                  |    |
| 60 |                                                                                  |    |



|    |                                                                            |     |
|----|----------------------------------------------------------------------------|-----|
| 1  |                                                                            |     |
| 2  |                                                                            |     |
| 3  | Table 1.17 Summary of History of Tobacco Use (Run-in Population) .....     | 93  |
| 4  | Table 1.18 Summary of Screening Lung Function (Run-in Population).....     | 94  |
| 5  | Table 1.19 Summary of COPD Medications Taken Before the Run-in (Run-in     |     |
| 6  | Population) .....                                                          | 96  |
| 7  |                                                                            |     |
| 8  | Table 1.20 Summary of COPD Medications Taken During the Run-in (Run-in     |     |
| 9  | Population) .....                                                          | 98  |
| 10 |                                                                            |     |
| 11 | Table 1.21 Summary of COPD Medications Taken During Treatment (Modified    |     |
| 12 | Intent-to-treat Population) .....                                          | 99  |
| 13 | Table 1.22 Summary of COPD Medications Taken Post-Treatment (Modified      |     |
| 14 | Intent-to-treat Population) .....                                          | 101 |
| 15 | Table 1.23 Summary of Non-COPD Medications Taken During the Run-in         |     |
| 16 | (Run-in Population).....                                                   | 103 |
| 17 |                                                                            |     |
| 18 | Table 1.24 Summary of Non-COPD Medications Taken During Treatment          |     |
| 19 | (Modified Intent-to-treat Population) .....                                | 126 |
| 20 | Table 1.25 Summary of Non-COPD Medications Taken Post-Treatment            |     |
| 21 | (Modified Intent-to-treat Population) .....                                | 150 |
| 22 | Table 1.26 Summary of Treatment Compliance (Modified Intent-to-treat       |     |
| 23 | Population) .....                                                          | 172 |
| 24 |                                                                            |     |
| 25 | Table 1.27 Summary of Inhaler Malfunctions (Modified Intent-to-treat       |     |
| 26 | Population) .....                                                          | 173 |
| 27 | OTHER ASSESSMENTS DATA SOURCE FIGURES.....                                 | 174 |
| 28 | Figure 2.01 Scatter Plot of SOBDA Score at Run-in Week 2 vs Run-in Week 1  |     |
| 29 | - Subjects with response of 'no change' on second weekly PGAC              |     |
| 30 | assessment (on the day of or prior to Visit 2) (Run-in Population).....    | 174 |
| 31 |                                                                            |     |
| 32 | Figure 2.02 Scatter Plot of SOBDA Baseline Score vs Physician-Completed    |     |
| 33 | mMRC Score at Visit 2 (Run-in Population).....                             | 175 |
| 34 | Figure 2.03 Scatter Plot of SOBDA Baseline Score vs Participant-Completed  |     |
| 35 | mMRC Score at Visit 2 (Run-in Population).....                             | 176 |
| 36 | Figure 2.04 Scatter Plot of SOBDA Baseline Score vs CRQ-SAS Dyspnoea       |     |
| 37 | Domain Score at Visit 2 (Run-in Population) .....                          | 177 |
| 38 | Figure 2.05 Scatter Plot of SOBDA Baseline Score vs CGI-S Score at Visit 2 |     |
| 39 | (Run-in Population).....                                                   | 178 |
| 40 | Figure 2.06 SOBDA Weekly Scores by CGI-C Response at Visit 3/PD            |     |
| 41 | (Modified Intent-to-treat Population) .....                                | 179 |
| 42 | Figure 2.07 SOBDA Weekly Scores by CRQ-SAS Dyspnoea Domain                 |     |
| 43 | Response at Visit 3/PD (Modified Intent-to-treat Population).....          | 180 |
| 44 | Figure 2.08 SOBDA Weekly Scores by Physician-Completed mMRC Response       |     |
| 45 | at Visit 3/PD (Modified Intent-to-treat Population).....                   | 181 |
| 46 | Figure 2.09 SOBDA Weekly Scores by Participant-Completed mMRC              |     |
| 47 | Response at Visit 3/PD (Modified Intent-to-treat Population).....          | 182 |
| 48 | Figure 2.10 Cumulative Distribution Plot of Change from Baseline to Week 1 |     |
| 49 | SOBDA Score by PGAC Response Categories at Study Day 8                     |     |
| 50 | (Modified Intent-to-treat Population) .....                                | 183 |
| 51 | Figure 2.11 Cumulative Distribution Plot of Change from Week 1 to Week 2   |     |
| 52 | SOBDA Score by PGAC Response Categories at Study Day 15                    |     |
| 53 | (Modified Intent-to-treat Population) .....                                | 184 |
| 54 |                                                                            |     |
| 55 |                                                                            |     |
| 56 |                                                                            |     |
| 57 |                                                                            |     |
| 58 |                                                                            |     |
| 59 |                                                                            |     |
| 60 |                                                                            |     |

|    |                                                                             |     |
|----|-----------------------------------------------------------------------------|-----|
| 1  |                                                                             |     |
| 2  |                                                                             |     |
| 3  | Figure 2.12 Cumulative Distribution Plot of Change from Week 2 to Week 3    |     |
| 4  | SOBDA Score by PGAC Response Categories at Study Day 22                     |     |
| 5  | (Modified Intent-to-treat Population) .....                                 | 185 |
| 6  | Figure 2.13 Cumulative Distribution Plot of Change from Week 3 to Week 4    |     |
| 7  | SOBDA Score by PGAC Response Categories at Study Day 29                     |     |
| 8  | (Modified Intent-to-treat Population) .....                                 | 186 |
| 9  | Figure 2.14 Cumulative Distribution Plot of Change from Week 4 to Week 5    |     |
| 10 | SOBDA Score by PGAC Response Categories at Study Day 36                     |     |
| 11 | (Modified Intent-to-treat Population) .....                                 | 187 |
| 12 | Figure 2.15 Cumulative Distribution Plot of Change from Week 5 to Week 6    |     |
| 13 | SOBDA Score by PGAC Response Categories at Study Day 43                     |     |
| 14 | (Modified Intent-to-treat Population) .....                                 | 188 |
| 15 | Figure 2.16 Cumulative Distribution Plot of Change from Baseline in SOBDA   |     |
| 16 | Last Treatment Week Score by CGI-C Response Categories at Visit             |     |
| 17 | 3/PD (Modified Intent-to-treat Population) .....                            | 189 |
| 18 | Figure 2.17 Cumulative Distribution Plot of Percentage Change from Baseline |     |
| 19 | in SOBDA Last Treatment Week Score by CGI-C Response                        |     |
| 20 | Categories at Visit 3/PD (Modified Intent-to-treat Population) .....        | 190 |
| 21 | Figure 2.18 Cumulative Distribution Plot of Change from Baseline in SOBDA   |     |
| 22 | Last Treatment Week Score by CRQ-SAS Dyspnoea Domain 3-Point                |     |
| 23 | Response Categories at Visit 3 (Modified Intent-to-treat Population) .....  | 191 |
| 24 | Figure 2.19 Cumulative Distribution Plot of Percentage Change from Baseline |     |
| 25 | in SOBDA Last Treatment Week Score by CRQ-SAS Dyspnoea                      |     |
| 26 | Domain 3-Point Response Categories at Visit 3 (Modified Intent-to-          |     |
| 27 | treat Population) .....                                                     | 192 |
| 28 | Figure 2.20 Cumulative Distribution Plot of Change from Baseline in SOBDA   |     |
| 29 | Last Treatment Week Score by FEV1 3-Point Response Categories               |     |
| 30 | at Visit 3 (Modified Intent-to-treat Population).....                       | 193 |
| 31 | Figure 2.21 Cumulative Distribution Plot of Percentage Change from Baseline |     |
| 32 | in SOBDA Last Treatment Week Score by FEV1 3-Point Response                 |     |
| 33 | Categories at Visit 3 (Modified Intent-to-treat Population) .....           | 194 |
| 34 | OTHER ASSESSMENTS DATA SOURCE TABLES.....                                   | 195 |
| 35 | Table 2.01 SOBDA Internal Consistency: Cronbachs Alpha Value Subjects       |     |
| 36 | with a score for each SOBDA item on Day 1 of Run-in (Run-in                 |     |
| 37 | Population) .....                                                           | 195 |
| 38 | Table 2.02 SOBDA Test-Retest Reliability - Subjects with response of 'no    |     |
| 39 | change' on second weekly PGAC assessment (on the day of or prior            |     |
| 40 | to Visit 2) (Run-in Population).....                                        | 196 |
| 41 | Table 2.03 SOBDA Convergent Validity (Run-in Population) .....              | 197 |
| 42 | Table 2.04 SOBDA Known Group Validity: Summary of Comparison of SOBDA       |     |
| 43 | Baseline Score with Physician-Completed mMRC at Visit 2 (Run-in             |     |
| 44 | Population) .....                                                           | 198 |
| 45 | Table 2.05 SOBDA Known Group Validity: Analysis of Comparison of SOBDA      |     |
| 46 | Baseline Score with Physician-Completed mMRC at Visit 2 (Run-in             |     |
| 47 | Population) .....                                                           | 199 |
| 48 |                                                                             |     |
| 49 |                                                                             |     |
| 50 |                                                                             |     |
| 51 |                                                                             |     |
| 52 |                                                                             |     |
| 53 |                                                                             |     |
| 54 |                                                                             |     |
| 55 |                                                                             |     |
| 56 |                                                                             |     |
| 57 |                                                                             |     |
| 58 |                                                                             |     |
| 59 |                                                                             |     |
| 60 |                                                                             |     |

ASQ112989

|    |                                                                        |     |
|----|------------------------------------------------------------------------|-----|
| 1  |                                                                        |     |
| 2  |                                                                        |     |
| 3  |                                                                        |     |
| 4  | Table 2.06 SOBDA Known Group Validity: Summary of Comparison of SOBDA  |     |
| 5  | Baseline Score with Participant- Completed mMRC at Visit 2 (Run-in     |     |
| 6  | Population) .....                                                      | 200 |
| 7  | Table 2.07 SOBDA Known Group Validity: Analysis of Comparison of SOBDA |     |
| 8  | Baseline Score with Participant- Completed mMRC at Visit 2 (Run-in     |     |
| 9  | Population) .....                                                      | 201 |
| 10 | Table 2.08 SOBDA Known Group Validity: Summary of Comparison of SOBDA  |     |
| 11 | Baseline Score with CGI-S at Visit 2 (Run-in Population).....          | 202 |
| 12 | Table 2.09 SOBDA Known Group Validity: Analysis of Comparison of SOBDA |     |
| 13 | Baseline Score with CGI-S at Visit 2 (Run-in Population).....          | 203 |
| 14 | Table 2.10 SOBDA Responsiveness: Summary of SOBDA Treatment Week 1     |     |
| 15 | Score by PGAC Response at Study Day 8 (Modified intent-to-treat        |     |
| 16 | Population) .....                                                      | 204 |
| 17 | Table 2.11 SOBDA Responsiveness: Analysis of SOBDA Treatment Week 1    |     |
| 18 | Score by PGAC Response at Study Day 8 (Modified intent-to-treat        |     |
| 19 | Population) .....                                                      | 205 |
| 20 | Table 2.12 SOBDA Responsiveness: Summary of SOBDA Treatment Week 2     |     |
| 21 | Score by PGAC Response at Study Day 15 (Modified intent-to-treat       |     |
| 22 | Population) .....                                                      | 206 |
| 23 | Table 2.13 SOBDA Responsiveness: Analysis of SOBDA Treatment Week 2    |     |
| 24 | Score by PGAC Response at Study Day 15 (Modified intent-to-treat       |     |
| 25 | Population) .....                                                      | 207 |
| 26 | Table 2.14 SOBDA Responsiveness: Summary of SOBDA Treatment Week 3     |     |
| 27 | Score by PGAC Response at Study Day 22 (Modified intent-to-treat       |     |
| 28 | Population) .....                                                      | 208 |
| 29 | Table 2.15 SOBDA Responsiveness: Analysis of SOBDA Treatment Week 3    |     |
| 30 | Score by PGAC Response at Study Day 22 (Modified intent-to-treat       |     |
| 31 | Population) .....                                                      | 209 |
| 32 | Table 2.16 SOBDA Responsiveness: Summary of SOBDA Treatment Week 4     |     |
| 33 | Score by PGAC Response at Study Day 29 (Modified intent-to-treat       |     |
| 34 | Population) .....                                                      | 210 |
| 35 | Table 2.17 SOBDA Responsiveness: Analysis of SOBDA Treatment Week 4    |     |
| 36 | Score by PGAC Response at Study Day 29 (Modified intent-to-treat       |     |
| 37 | Population) .....                                                      | 211 |
| 38 | Table 2.18 SOBDA Responsiveness: Summary of SOBDA Treatment Week 5     |     |
| 39 | Score by PGAC Response at Study Day 36 (Modified intent-to-treat       |     |
| 40 | Population) .....                                                      | 212 |
| 41 | Table 2.19 SOBDA Responsiveness: Analysis of SOBDA Treatment Week 5    |     |
| 42 | Score by PGAC Response at Study Day 36 (Modified intent-to-treat       |     |
| 43 | Population) .....                                                      | 213 |
| 44 | Table 2.20 SOBDA Responsiveness: Summary of SOBDA Treatment Week 6     |     |
| 45 | Score by PGAC Response at Study Day 43 (Modified intent-to-treat       |     |
| 46 | Population) .....                                                      | 214 |
| 47 | Table 2.21 SOBDA Responsiveness: Analysis of SOBDA Treatment Week 6    |     |
| 48 | Score by PGAC Response at Study Day 43 (Modified intent-to-treat       |     |
| 49 | Population) .....                                                      | 215 |
| 50 |                                                                        |     |
| 51 |                                                                        |     |
| 52 |                                                                        |     |
| 53 |                                                                        |     |
| 54 |                                                                        |     |
| 55 |                                                                        |     |
| 56 |                                                                        |     |
| 57 |                                                                        |     |
| 58 |                                                                        |     |
| 59 |                                                                        |     |
| 60 |                                                                        |     |

|    |                                                                     |     |
|----|---------------------------------------------------------------------|-----|
| 1  |                                                                     |     |
| 2  |                                                                     |     |
| 3  | Table 2.22 SOBDA Responsiveness: Summary of SOBDA Last Treatment    |     |
| 4  | Week Score by PGAC Response at Visit 3 (Modified intent-to-treat    |     |
| 5  | Population) .....                                                   | 216 |
| 6  |                                                                     |     |
| 7  | Table 2.23 SOBDA Responsiveness: Analysis of SOBDA Last Treatment   |     |
| 8  | Week Score by PGAC Response at Visit 3 (Modified intent-to-treat    |     |
| 9  | Population) .....                                                   | 217 |
| 10 |                                                                     |     |
| 11 | Table 2.24 SOBDA Responsiveness: Summary of SOBDA Last Treatment    |     |
| 12 | Week Score by CGI-C Response at Visit 3 (Modified intent-to-treat   |     |
| 13 | Population) .....                                                   | 218 |
| 14 |                                                                     |     |
| 15 | Table 2.25 SOBDA Responsiveness: Analysis of SOBDA Last Treatment   |     |
| 16 | Week Score by CGI-C Response at Visit 3 (Modified intent-to-treat   |     |
| 17 | Population) .....                                                   | 219 |
| 18 |                                                                     |     |
| 19 | Table 2.26 SOBDA Responsiveness: Summary of SOBDA Last Treatment    |     |
| 20 | Week Score by CRQ-SAS Dyspnoea Domain Response at Visit 3           |     |
| 21 | (Modified intent-to-treat Population) .....                         | 220 |
| 22 |                                                                     |     |
| 23 | Table 2.27 SOBDA Responsiveness: Analysis of SOBDA Last Treatment   |     |
| 24 | Week Score by CRQ-SAS Dyspnoea Domain Response at Visit 3           |     |
| 25 | (Modified intent-to-treat Population) .....                         | 221 |
| 26 |                                                                     |     |
| 27 | Table 2.28 SOBDA Responsiveness: Summary of SOBDA Last Treatment    |     |
| 28 | Week Score by Physician-Completed mMRC Response at Visit 3          |     |
| 29 | (Modified intent-to-treat Population) .....                         | 222 |
| 30 |                                                                     |     |
| 31 | Table 2.29 SOBDA Responsiveness: Analysis of SOBDA Last Treatment   |     |
| 32 | Week Score by Physician-Completed mMRC Response at Visit 3          |     |
| 33 | (Modified intent-to-treat Population) .....                         | 223 |
| 34 |                                                                     |     |
| 35 | Table 2.30 SOBDA Responsiveness: Summary of SOBDA Last Treatment    |     |
| 36 | Week Score by Participant-Completed mMRC Response at Visit 3        |     |
| 37 | (Modified intent-to-treat Population) .....                         | 224 |
| 38 |                                                                     |     |
| 39 | Table 2.31 SOBDA Responsiveness: Analysis of SOBDA Last Treatment   |     |
| 40 | Week Score by Participant-Completed mMRC Response at Visit 3        |     |
| 41 | (Modified intent-to-treat Population) .....                         | 225 |
| 42 |                                                                     |     |
| 43 | Table 2.32 SOBDA Threshold for Response: Summary of SOBDA Treatment |     |
| 44 | Week 1 Score by PGAC Response Category at Study Day 8               |     |
| 45 | (Modified Intent-to-treat Population) .....                         | 226 |
| 46 |                                                                     |     |
| 47 | Table 2.33 SOBDA Threshold for Response: Summary of SOBDA Treatment |     |
| 48 | Week 2 Score by PGAC Response Category at Study Day 15              |     |
| 49 | (Modified Intent-to-treat Population) .....                         | 227 |
| 50 |                                                                     |     |
| 51 | Table 2.34 SOBDA Threshold for Response: Summary of SOBDA Treatment |     |
| 52 | Week 3 Score by PGAC Response Category at Study Day 22              |     |
| 53 | (Modified Intent-to-treat Population) .....                         | 228 |
| 54 |                                                                     |     |
| 55 | Table 2.35 SOBDA Threshold for Response: Summary of SOBDA Treatment |     |
| 56 | Week 4 Score by PGAC Response Category at Study Day 29              |     |
| 57 | (Modified Intent-to-treat Population) .....                         | 229 |
| 58 |                                                                     |     |
| 59 | Table 2.36 SOBDA Threshold for Response: Summary of SOBDA Treatment |     |
| 60 | Week 5 Score by PGAC Response Category at Study Day 36              |     |
|    | (Modified Intent-to-treat Population) .....                         | 230 |

|    |                                                                              |     |
|----|------------------------------------------------------------------------------|-----|
| 1  |                                                                              |     |
| 2  |                                                                              |     |
| 3  |                                                                              |     |
| 4  | Table 2.37 SOBDA Threshold for Response: Summary of SOBDA Treatment          |     |
| 5  | Week 6 Score by PGAC Response Category at Study Day 43                       |     |
| 6  | (Modified Intent-to-treat Population) .....                                  | 231 |
| 7  | Table 2.38 SOBDA Threshold for Response: Summary of SOBDA Last               |     |
| 8  | Treatment Week Score by CGI-C Response Category at Visit 3                   |     |
| 9  | (Modified Intent-to-treat Population) .....                                  | 232 |
| 10 | Table 2.39 SOBDA Threshold for Response: Summary of SOBDA Last               |     |
| 11 | Treatment Week Score by CRQ-SAS Dyspnoea Domain 3-Point                      |     |
| 12 | Response Category at Visit 3 (Modified Intent-to-treat Population) .....     | 233 |
| 13 | Table 2.40 SOBDA Threshold for Response: Summary of SOBDA Last               |     |
| 14 | Treatment Week Score by FEV1 3-Point Response Category at Visit              |     |
| 15 | 3 (Modified Intent-to-treat Population) .....                                | 234 |
| 16 |                                                                              |     |
| 17 | EFFICACY DATA SOURCE FIGURES .....                                           | 235 |
| 18 | Figure 3.01 Cumulative Distribution Plot of Change from Baseline in SOBDA    |     |
| 19 | Last Treatment Week Score by Treatment Daily Mean Score:                     |     |
| 20 | Rescored Response Categories (Modified Intent-to-treat Population)....       | 235 |
| 21 |                                                                              |     |
| 22 | EFFICACY DATA SOURCE TABLES .....                                            | 236 |
| 23 | Table 3.01 Summary of Compliance with SOBDA Diary Completion (Modified       |     |
| 24 | Intent-to-treat Population) .....                                            | 236 |
| 25 | Table 3.02 Summary of SOBDA Summary Scores (Run-in Population) .....         | 237 |
| 26 | Table 3.03 Summary of Change from Baseline in SOBDA Summary Scores           |     |
| 27 | (Modified Intent-to-treat Population) .....                                  | 240 |
| 28 | Table 3.04 Summary of SOBDA Summary Score Response (Modified Intent-         |     |
| 29 | to-treat Population) .....                                                   | 242 |
| 30 | Table 3.05 Analysis of Change from Baseline in SOBDA Last Treatment Week     |     |
| 31 | Score (Modified Intent-to-treat Population) .....                            | 244 |
| 32 | Table 3.06 Summary of Mean Number of Puffs of Rescue per Day (Run-in         |     |
| 33 | Population) .....                                                            | 245 |
| 34 | Table 3.07 Summary of Change from Baseline in Mean Number of Puffs of        |     |
| 35 | Rescue per Day (Modified Intent-to-treat Population).....                    | 248 |
| 36 | Table 3.08 Summary of Percentage of Rescue-Free Days (Run-in Population) ... | 250 |
| 37 | Table 3.09 Summary of Change from Baseline in Percentage of Rescue-Free      |     |
| 38 | Days (Modified Intent-to-treat Population) .....                             | 253 |
| 39 | Table 3.10 Summary of Global Assessment of Shortness of Breath (Run-in       |     |
| 40 | Population) .....                                                            | 255 |
| 41 | Table 3.11 Summary of PGAC (Run-in Population) .....                         | 269 |
| 42 | Table 3.12 Summary of PGAC Response (Run-in Population) .....                | 272 |
| 43 | Table 3.13 Summary of Participant Exit Evaluation (Modified Intent-to-treat  |     |
| 44 | Population) .....                                                            | 274 |
| 45 | Table 3.14 Summary of FEV1 (Modified Intent-to-treat Population) .....       | 276 |
| 46 | Table 3.15 Summary of Change from Baseline in FEV1 at Visit 3/PD (Modified   |     |
| 47 | Intent-to-treat Population) .....                                            | 277 |
| 48 | Table 3.16 Summary of FEV1 Response at Visit 3/PD (Modified Intent-to-treat  |     |
| 49 | Population) .....                                                            | 278 |
| 50 | Table 3.17 Summary of FVC (Modified Intent-to-treat Population).....         | 279 |
| 51 |                                                                              |     |
| 52 |                                                                              |     |
| 53 |                                                                              |     |
| 54 |                                                                              |     |
| 55 |                                                                              |     |
| 56 |                                                                              |     |
| 57 |                                                                              |     |
| 58 |                                                                              |     |
| 59 |                                                                              |     |
| 60 |                                                                              |     |

|    |                                                                               |     |
|----|-------------------------------------------------------------------------------|-----|
| 1  |                                                                               |     |
| 2  |                                                                               |     |
| 3  |                                                                               |     |
| 4  | Table 3.18 Summary of Change from Baseline in FVC at Visit 3/PD (Modified     |     |
| 5  | Intent-to-treat Population) .....                                             | 280 |
| 6  | Table 3.19 Summary of CRQ-SAS Domain Scores (Run-in Population).....          | 281 |
| 7  | Table 3.20 Summary of Change from Baseline in CRQ-SAS Domain Scores at        |     |
| 8  | Visit 3/PD (Modified Intent-to-treat Population).....                         | 283 |
| 9  | Table 3.21 Summary of CRQ-SAS Dyspnoea Domain Response (Modified              |     |
| 10 | Intent-to-treat Population) .....                                             | 284 |
| 11 | Table 3.22 Summary of CGI-S (Run-in Population) .....                         | 285 |
| 12 | Table 3.23 Summary of CGI-C (Modified Intent-to-treat Population).....        | 286 |
| 13 | Table 3.24 Summary of Participant-Completed mMRC Dyspnoea Scale (Run-         |     |
| 14 | in Population).....                                                           | 287 |
| 15 | Table 3.25 Summary of Participant-Completed mMRC Response (Modified           |     |
| 16 | Intent-to-treat Population) .....                                             | 290 |
| 17 | Table 3.26 Summary of Physician-Completed mMRC Dyspnoea Scale (Run-in         |     |
| 18 | Population) .....                                                             | 291 |
| 19 | Table 3.27 Summary of Physician-Completed mMRC Response (Modified             |     |
| 20 | Intent-to-treat Population) .....                                             | 294 |
| 21 | Table 3.27 Summary of Physician-Completed mMRC Response (Modified             |     |
| 22 | Intent-to-treat Population) .....                                             | 294 |
| 23 | SAFETY DATA SOURCE TABLES .....                                               | 295 |
| 24 | Table 4.01 Summary of Exposure to Study Drug (Modified Intent-to-treat        |     |
| 25 | Population) .....                                                             | 295 |
| 26 | Table 4.02 On-Treatment Adverse Event Overview (Modified Intent-to-treat      |     |
| 27 | Population) .....                                                             | 296 |
| 28 | Table 4.03 Summary of On-Treatment Adverse Events (Modified Intent-to-treat   |     |
| 29 | Population) .....                                                             | 297 |
| 30 | Table 4.04 Summary of Post-Treatment Adverse Events (Modified Intent-to-      |     |
| 31 | treat Population) .....                                                       | 302 |
| 32 | Table 4.05 Summary of Serious Adverse Events for Subjects Who did not         |     |
| 33 | Receive Randomised Treatment (All Subjects Enrolled Population) .....         | 304 |
| 34 | Table 4.06 Summary of Pre-Treatment Serious Adverse Events (Modified          |     |
| 35 | Intent-to-treat Population) .....                                             | 305 |
| 36 | Table 4.07 Summary of On-Treatment Serious Adverse Events (Modified           |     |
| 37 | Intent-to-treat Population) .....                                             | 306 |
| 38 | Table 4.08 Summary of Post-Treatment Serious Adverse Events (Modified         |     |
| 39 | Intent-to-treat Population) .....                                             | 308 |
| 40 | Table 4.09 Summary of Drug-Related On-Treatment Adverse Events (Modified      |     |
| 41 | Intent-to-treat Population) .....                                             | 309 |
| 42 | Table 4.10 Summary of On-Treatment Adverse Events Leading to Permanent        |     |
| 43 | Discontinuation of Investigational Product and/or Withdrawal from             |     |
| 44 | Study (Modified Intent-to-treat Population) .....                             | 311 |
| 45 | Table 4.11 Summary of Vital Signs (Modified Intent-to-treat Population) ..... | 313 |
| 46 | Table 4.12 Summary of ECG Findings at Screening (All Subjects Enrolled        |     |
| 47 | Population) .....                                                             | 316 |
| 48 | Table 4.13 Summary of On-Treatment COPD Exacerbations (Modified Intent-       |     |
| 49 | to-treat Population) .....                                                    | 317 |
| 50 | HEALTH OUTCOMES DATA SOURCE TABLES .....                                      | 318 |
| 51 | Table 5.01 Summary of Healthcare Provider Contacts (Run-in Population).....   | 318 |
| 52 |                                                                               |     |
| 53 |                                                                               |     |
| 54 |                                                                               |     |
| 55 |                                                                               |     |
| 56 |                                                                               |     |
| 57 |                                                                               |     |
| 58 |                                                                               |     |
| 59 |                                                                               |     |
| 60 |                                                                               |     |

ASQ112989

|                                                                                                                          |     |
|--------------------------------------------------------------------------------------------------------------------------|-----|
| Table 5.02 Summary of Unscheduled Healthcare Utilisation During the Run-in<br>(Run-in Population).....                   | 319 |
| Table 5.03 Summary of Unscheduled Healthcare Utilisation During Treatment<br>(Modified Intent-to-treat Population) ..... | 321 |

For peer review only

1  
2  
3  
4  
5  
6  
7  
8  
9  
10  
11  
12  
13  
14  
15  
16  
17  
18  
19  
20  
21  
22  
23  
24  
25  
26  
27  
28  
29  
30  
31  
32  
33  
34  
35  
36  
37  
38  
39  
40  
41  
42  
43  
44  
45  
46  
47  
48  
49  
50  
51  
52  
53  
54  
55  
56  
57  
58  
59  
60

**Abbreviations**

|    |                  |                                                          |
|----|------------------|----------------------------------------------------------|
| 1  |                  |                                                          |
| 2  |                  |                                                          |
| 3  |                  |                                                          |
| 4  |                  |                                                          |
| 5  | AE               | Adverse Event                                            |
| 6  | ANOVA            | Analysis of Variance                                     |
| 7  | ATS              | American Thoracic Society                                |
| 8  | BID              | Twice Daily                                              |
| 9  | CGI-S            | Clinician Global Impression of Dyspnea Severity          |
| 10 | CGI-C            | Clinical Global Impression of Change                     |
| 11 | COPD             | Chronic Obstructive Pulmonary Disease                    |
| 12 | CRF              | Case Report Form                                         |
| 13 | CRQ-SAS          | Chronic Respiratory Disease Questionnaire                |
| 14 | ECG              | Electrocardiogram                                        |
| 15 | EMEA             | European Agency for the Evaluation of Medicinal Products |
| 16 | FDA              | Food and Drug Administration                             |
| 17 | FEV <sub>1</sub> | Forced Expiratory Volume in one second                   |
| 18 | FSC              | Fluticasone propionate/salmeterol combination product    |
| 19 | FVC              | Forced Vital Capacity                                    |
| 20 | GCP              | Good Clinical Practice                                   |
| 21 | GCSP             | Global Clinical Safety and Pharmacovigilance             |
| 22 | GOLD             | Global Initiative for Chronic Obstructive Lung Disease   |
| 23 | GSK              | GlaxoSmithKline                                          |
| 24 | IEC              | Independent Ethics Committee                             |
| 25 | IRB              | Institutional Review Board                               |
| 26 | mITT             | Modified Intent-to-Treat                                 |
| 27 | IVRS             | Interactive Voice Response System                        |
| 28 | L                | Liter                                                    |
| 29 | LAMA             | Long-acting muscarinic antagonist                        |
| 30 | LABA             | Long-acting beta agonist                                 |
| 31 | mcg              | Microgram                                                |
| 32 | MedRA            | Medical Dictionary for Regulatory Activities             |
| 33 | MID              | Minimal Important difference                             |
| 34 | MLFA             | Maximum Likelihood Factor Analysis                       |
| 35 | mMRC             | Modified Medical Research Council Dyspnea Scale          |
| 36 | NHANES           | National Health and Nutrition Examination Survey         |
| 37 | PD               | Premature Discontinuation                                |
| 38 | PEF              | Peak Expiratory Flow                                     |
| 39 | PGAC             | Patient Global Assessment of Change                      |
| 40 | PRO              | Patient Reported Outcome                                 |
| 41 | QoL              | Quality of Life                                          |
| 42 | SAE              | Serious Adverse Event                                    |
| 43 | SBQ              | Shortness of Breath Questionnaire                        |
| 44 | SAL              | Salmeterol                                               |
| 45 | SEALD            | Study Endpoint and Label Development                     |
| 46 | SGRQ             | St. George's Respiratory Questionnaire                   |
| 47 | SOBDA            | Shortness of Breath with Daily Activities                |
| 48 | SES              | Standardized Effect Size                                 |
| 49 | SNP              | Single Nucleotide Polymorphism                           |
| 50 | SOC              | System Organ Class                                       |
| 51 |                  |                                                          |
| 52 |                  |                                                          |
| 53 |                  |                                                          |
| 54 |                  |                                                          |
| 55 |                  |                                                          |
| 56 |                  |                                                          |
| 57 |                  |                                                          |
| 58 |                  |                                                          |
| 59 |                  |                                                          |
| 60 |                  |                                                          |



SRM Study Reference Manual  
UHU Unscheduled Healthcare Utilization

### Trademark Information

| Trademarks of the GlaxoSmithKline group of companies |
|------------------------------------------------------|
| DISKUS                                               |
|                                                      |
|                                                      |

| Trademarks not owned by the GlaxoSmithKline group of companies |
|----------------------------------------------------------------|
| SAS                                                            |
| UNIX                                                           |
| HARP                                                           |

For peer review only

1  
2  
3  
4  
5  
6  
7  
8  
9  
10  
11  
12  
13  
14  
15  
16  
17  
18  
19  
20  
21  
22  
23  
24  
25  
26  
27  
28  
29  
30  
31  
32  
33  
34  
35  
36  
37  
38  
39  
40  
41  
42  
43  
44  
45  
46  
47  
48  
49  
50  
51  
52  
53  
54  
55  
56  
57  
58  
59  
60

## ETHICS AND GOOD CLINICAL PRACTICE

The study protocol, any amendments, the informed consent, and other information that required pre-approval were reviewed and approved by a national, regional, or investigational center ethics committee or institutional review board, in accordance with the International Conference on Harmonization of Technical Requirements for Registration of Pharmaceuticals for Human Use (ICH) Good Clinical Practice (GCP) and applicable country-specific requirements, including US 21 Code of Federal Regulations (CFR) 312.3(b) for constitution of independent ethics committees. Ethics committee or institutional review board approvals are maintained in the Sponsor's study file.

This study was conducted in accordance with ICH GCP and all applicable subject privacy requirements, and, the ethical principles that are outlined in the Declaration of Helsinki 2008.

Investigators were trained to conduct the study in accordance with GCPs and the study protocol as defined in ICH E3, Section 9.6. Written commitments were obtained from investigators to comply with GCP and to conduct the study in accordance with the protocol. The study was monitored in accordance with ICH E6, Section 5.18.

Written informed consent was obtained from each subject prior to the performance of any study-specific procedures. The subject was provided as much time as necessary to review the document, to inquire about details of the trial, and to decide whether or not to participate in the study. The informed consent was signed and dated by the study subject and by the person who conducted the informed consent discussion. Case report forms were provided for each subject's data to be recorded.

## 1. INTRODUCTION

### 1.1. Background

Approximately 10 million Americans suffer from chronic obstructive pulmonary disease (COPD). However, according to a national health survey as many as 24 million Americans are affected, indicating an under-diagnosis of COPD [CDC, 2006]. COPD is a major cause of death and illness throughout the world. In the US, it is currently the fourth leading cause of death and is projected to be the third leading cause of death by 2020 [Nunnally, 1994; Petty, 2003]. In the past, COPD was a disease affecting mostly men. However, new findings have reported that in the year 2002, COPD resulted in more deaths in females than males [Mannino, 2002].

COPD is a disease in which the lungs are damaged, making it difficult to breathe. Although a person's genetic make-up likely play a role in the disease process, studies have repeatedly found that cigarette smoking is the most important and consistent determinant of COPD development [Stang, 2000]. Inhaling lung irritants, such as pollution, dust, or chemicals over prolonged periods may also cause or contribute to COPD. This is a slowly progressive disease and it may require many years before symptoms develop. Therefore, in most cases, COPD is diagnosed in middle-age or later in life.

The diagnosis of COPD is confirmed by the measurement of airflow limitation using spirometry (a post-bronchodilator ratio of forced expiratory volume in 1 second (FEV<sub>1</sub>) to forced vital capacity (FVC) of less than 70% which is not fully reversible). Accordingly, severity assessment of airflow obstruction and need for treatment is primarily based on the percentage of predicted FEV<sub>1</sub>. However, spirometric tests have been shown to correlate poorly with symptoms in moderate and severe subjects. It is also now recognized that FEV<sub>1</sub> does not fully describe the severity of the disability in COPD and that additional measurements are needed. Specific respiratory health status measures, shortness of breath scales, performance exercises, and exacerbation rates have been developed to provide a more complete picture of the impact of COPD over time [MacNee, 2003].

### 1.2. Rationale

Dyspnea, referred to by patients as "shortness of breath" or "breathlessness," is frequently associated with decreases in functional status, quality of life (QoL), and disabilities [ATS, 1999]. According to a telephone survey of 3,000 patients with Chronic Obstructive Pulmonary Disease (COPD), 56% of patients were found to have breathlessness during normal physical activities and 42% reported breathlessness while doing household chores [Rennard, 2002]. While the patient-reported aspects of COPD have been assessed using questionnaires such as the Chronic Respiratory Disease Questionnaire (CRQ) and St. George's Respiratory Questionnaire (SGRQ), current questionnaires that are available do not specifically address the shortness of breath component of COPD or are not appropriate to be used as an endpoint during drug development. For this reason, GSK has undertaken the development of a patient reported

1  
2  
3 outcome (PRO) questionnaire that will specifically assess Shortness of Breath with Daily  
4 Activities (SOBDA) in patients with COPD.

5  
6 GSK have met with the Division of Pulmonary, Allergy and Rheumatology Drug  
7 Products on multiple occasions to discuss the development of a patient-reported outcome  
8 instrument to measure dyspnea in patients with COPD. In 2006, the division highlighted  
9 several areas where further research was needed to support the proposed instrument, the  
10 Shortness of Breath Questionnaire (SBQ). Based on this feedback, GSK re-initiated the  
11 process of instrument development, beginning with an updated literature review,  
12 extensive qualitative research, and new item pool development.

13  
14  
15 The comments and recommendations made by the division in 2006 were implemented in  
16 the development of a new instrument, the Shortness of Breath with Daily Activities  
17 (SOBDA) questionnaire. As of the date of this abbreviated report, GSK are actively  
18 working with the division/SEALD to agree on the content validity of the questionnaire  
19 and appropriate alternative scoring so that it can be used to support labelling claims.

20  
21  
22 GSK have also sought advice from the European Medicines Agency (EMA) on the use of  
23 SOBDA as the key secondary endpoint within the clinical programme for LAMA/LABA  
24 combination products. EMA endorsed the methodology used in SOBDA development to  
25 date and, whilst noting that development was US based, also endorsed translation and  
26 linguistic validation plans. Due to lack of experience with the tool they were only able to  
27 support the use of SOBDA as an exploratory endpoint until sufficient experience is  
28 gained in a clinical trial setting.

29  
30  
31 The SOBDA questionnaire has previously been examined in an observational study to  
32 item-reduce the questionnaire and evaluate its psychometric and clinimetric attributes.  
33 The SOBDA questionnaire was then assessed in this prospective interventional study  
34 using an electronic daily diary to further test the reliability (consistency at a given point  
35 in time, and stability during repeat measures over time) and the validity (ability of the  
36 questionnaire to measure the required information) and responsiveness (ability of the  
37 questionnaire to measure changes over time), define the threshold for responders and to  
38 determine the minimum important difference (MID) of the final questionnaire. These  
39 characteristics ensure that a measure will be useful in cross-sectional and longitudinal  
40 prospective studies, and will produce results that will be relevant and meaningful, rather  
41 than results that are due to an artifact of the metric or to measurement error.

## 42 43 44 45 **2. STUDY OBJECTIVES**

46  
47  
48 The objective of this study was the validation of the SOBDA Questionnaire as defined by  
49 the following:

50  
51 Confirm the cross-sectional and longitudinal psychometric properties of the final  
52 questionnaire.

53  
54 Evaluate the responsiveness of the final questionnaire.

55  
56 Define the threshold for responders for the questionnaire.

57  
58 Determine the minimally important difference.

### 3. INVESTIGATORS AND STUDY ADMINISTRATIVE STRUCTURE

This was a study conducted in the United States only and sponsored by GSK. A total of 40 centers randomized 366 subjects to treatment. The study was initiated on 29 Oct 2009 (first subject screened) and was completed on 01 July 2010 (last subject data entered into the database).

GSK Clinical Data Sciences in Toronto, Canada and GSK Statistics and Programming in Stockley Park, UK, conducted the data management and statistical analysis, respectively, for this study.

All investigators and responsible study site staff attended an investigator training meeting and/or separate study site initiation visit to review study protocol procedures, study requirements, and GCP responsibilities. Investigators and staff were given opportunity to discuss any aspect of the study protocol and GCP requirements. Training records were reviewed to ensure investigators and staff were qualified to conduct the study and to document training in GCP. Any staff lacking in GCP training were either sent to a GCP training course or provided an electronic GCP training module. Documentation of GCP training was confirmed prior to staff participation in the study.

Principal investigators signed the investigator page of the protocol to confirm their commitment to conduct the study in accord with the protocol and GCP. The signed documents have been archived within individual investigator study files.

Written informed consent was obtained from each subject prior to the performance of any study-specific procedures. The subject was provided as much time as necessary to review the document, to inquire about details of the trial, and to decide whether or not to participate in the study. The informed consent was signed and dated by the study subject and by the person who conducted the informed consent discussion. Electronic case report forms (eCRF) were created for each subject's data to be recorded.

In accordance with applicable regulations, GCP and GSK procedures, GSK monitors contacted the site prior to the start of the study to review with the site staff the protocol, study requirements, and their responsibilities to satisfy regulatory, ethical, and GSK requirements. When reviewing data collection procedures, the discussion included identification, agreement and documentation of data items for which the CRF served as the source document. GSK monitored the study to ensure that: (1) the data are authentic, accurate, and complete; (2) the safety and rights of subjects were protected; (3) the study was conducted in accordance with the currently approved protocol and any other study agreements, GCP and all applicable regulatory requirements.

## 4. INVESTIGATIONAL PLAN

### 4.1. Study Design

This was a multi-center, randomized, double-blind, parallel-group study of FSC 250/50mcg, SAL 50mcg, and placebo BID via DISKUS™ over 6 weeks in subjects with COPD. Approximately 350 subjects were planned to be randomized 2:2:1, to FSC 250/50mcg, SAL 50mcg and placebo respectively.

Following Screening (Visit 1), the study commenced with a 2-week run-in period, during which subjects were permitted to use albuterol and/or ipratropium as rescue medication. Subjects using ipratropium prior to the screening visit could continue using ipratropium during the study. Eligible subjects at Visit 2 were randomized to receive FSC 250/50mcg BID, SAL 50mcg BID, or placebo BID. An additional clinic visit occurred after 6 weeks of treatment (Visit 3). In the event that a subject withdrew from the study for any reason, the investigator was to make every effort to have the subject return to the clinic as soon as possible for a Premature Discontinuation Visit. Subjects were contacted by telephone 14 ± 2 days after the last clinic visit (Visit 3 or Premature Discontinuation Visit) for identification of adverse events (AEs) and pregnancy (as applicable).

### 4.2. Discussion of Study Design

The clinical endpoints for this study were selected to investigate the cross-sectional and longitudinal validity of the SOBDA in relation to clinical criteria. These clinical endpoints were chosen based upon clinical judgment and a review of the literature that indicated some empirical support for their relationship with shortness of breath with daily activities. Based upon previous clinical trial experience with FSC 250/50, a 6-week treatment period allowed sufficient time for clinical changes to be observed.

A target enrollment of approximately 350 male and female subjects was planned to obtain 320 evaluable subjects. Approximately 140 subjects were planned to be randomized to FSC 250/50mcg, 140 subjects to SAL 50mcg and 70 subjects to the placebo treatment arm.

### 4.3. Protocol Amendment(s)

The protocol was amended once on 16 July 2009 for all sites as follows:

Removed inclusion criteria 11, which mandated subjects have access to a telephone landline (wireless and analog transmission of eDiary data was subsequently adopted)

To clarify Screen Failures and Run-In Failures

To add a spirometry assessment to the Premature Discontinuation Visit

To add the Patient Exit Evaluation assessment to Visit 3

To include a description of the Medical Problems/Medications Taken Diary

To clarify text in the sample size and exploratory efficacy analysis sections.

#### 4.4. Selection of Study Population

##### 4.4.1. Inclusion/Exclusion Criteria

Full inclusion/exclusion criteria are provided in Section 4.2 and Section 4.3 of the protocol. Key criteria are detailed below.

##### Key Inclusion Criteria

Subjects eligible for enrolment in the study were required to meet all of the following criteria:

- Males or females (of non-childbearing potential) 40 years of age or older who provided written informed consent to participate and had an established clinical history of COPD in accordance with the definition provided by the American Thoracic Society/European Respiratory Society [Celli, 2004].
- Current or previous smokers with a cigarette smoking history of  $\geq 10$  pack-years. [Number of pack years = (number of cigarettes per day / 20) x number of years smoked (e.g., 10 pack-years is equal to 20 cigarettes per day for 10 years, or 10 cigarettes per day for 20 years)]. Former-smokers were defined as subjects who had discontinued smoking for  $\geq 6$  months prior to Visit 1. Subjects who decided to stop smoking at Visit 1 were not eligible for participation in the study.
- **Severity of Disease:** Subjects with a measured post-albuterol FEV<sub>1</sub>/FVC ratio of  $< 0.70$  at Visit 1 (Visit 1); and subjects with a measured post-albuterol FEV<sub>1</sub>  $\leq 70\%$  of predicted normal at Visit 1 (Visit 1) based on National Health and Nutrition Examination Survey (NHANES) III reference values [Hankinson, 1999].

##### Key Exclusion Criteria

Subjects meeting any of the following criteria were not to be enrolled in the study:

1. Women who were pregnant or lactating.
2. A current diagnosis of asthma or a respiratory disorder other than COPD (e.g., bronchiectasis, sarcoidosis, active tuberculosis, lung fibrosis), including subjects with a diagnosis of alpha-1-antitrypsin deficiency.
3. Subjects with lung-volume reduction surgery or lung transplant within the previous 12 months.
4. Clinically significant abnormalities in chest X-ray, computed tomography scan or ECG/cardiovascular findings not believed to be due to the presence of COPD.
5. Use of the following medications within the defined times of Visit 1:

| Medication                                               | Prior to Visit 1 |
|----------------------------------------------------------|------------------|
| Inhaled short-acting beta <sub>2</sub> -agonists         | 6 hours          |
| Ipratropium or Ipratropium/albuterol combination product | 6 hours          |
| Oral beta-agonists                                       | 48 hours         |
| Long acting beta-agonists (LABA)                         | 48 hours         |
| Theophylline preparations                                | 48 hours         |
| Cromolyn and Nedocromil inhaler                          | 48 hours         |
| Zafirlukast, montelukast, zileuton                       | 48 hours         |
| Tiotropium                                               | 7 days           |
| ICS/LABA combination products                            | 30 days          |
| Inhaled corticosteroids (ICS)                            | 30 days          |
| Oral or parenteral corticosteroids                       | 30 days          |
| Any investigational drug                                 | 30 days          |

6. Subject was receiving treatment with long-term oxygen therapy.
7. Subjects who were medically unable to withhold their albuterol or ipratropium for the six-hour period required prior to administration of questionnaires and spirometry at each study visit.
8. A COPD exacerbation and/or infection of the upper or lower respiratory tract that required treatment with systemic (oral or parenteral) corticosteroids and/or antibiotics that had not resolved within 30 days of Visit 1.

#### 4.4.2. Randomization Criteria

At Visit 2 (prior to randomization), the subject could not have experienced a COPD exacerbation and/or upper or lower respiratory tract infection requiring treatment with systemic (oral or parenteral) corticosteroids and/or antibiotics and/or hospitalization during the run-in period (including Visit 2).

#### 4.4.3. Withdrawal Criteria

Reasons for subject withdrawal included “adverse event”, “lack of efficacy”, “protocol deviation”, “lost to follow-up”, “investigator discretion” and “withdrew consent”. The investigator recorded the primary reason in the electronic case report form (eCRF).

The reason for subject withdrawal was recorded in the eCRF and study source documents.

Any female who became pregnant during the study was withdrawn.

#### 4.5. Treatments

The following double-blinded study medications were manufactured by GSK and provided to the sites by Clinical Trial Supplies of GSK Research and Development:



- Fluticasone propionate (CCI18781)/salmeterol xinafoate (GR33343G) combination product 250/50mcg per inhalation via DISKUS (formulated with lactose), batch numbers 091190419 and 091229977.
- Salmeterol xinafoate (GR33343G) 50mcg per inhalation via DISKUS (formulated with lactose), batch number 091198034.
- Placebo per inhalation via DISKUS (formulated with lactose) batch numbers 071136386 and 071143196.

GlaxoSmithKline Clinical Trial Supplies provided each investigational site with a bulk supply of albuterol for subjects to use as rescue medication. Subjects using ipratropium prior to the screening visit could continue using ipratropium during the study. GSK did not provide ipratropium to those subjects who wished to continue ipratropium during the study.

#### 4.5.1. Investigational Product and Reference Therapy

The contents of the label were in accordance with all applicable regulatory requirements.

Investigational product was stored in a secure area under the appropriate physical conditions for the product. Access to and administration of the investigational product was limited to the investigator and authorized site staff. Investigational product was dispensed or administered only to subjects enrolled in the study and in accordance with the protocol.

No site preparation of the study medications or supplies was needed for this clinical trial.

Under normal conditions of handling and administration, investigational product was not expected to pose significant safety risks to site staff. A Material Safety Data Sheet describing the occupational hazards and recommended handling precautions was provided to site staff if required by local laws or was otherwise available from GSK upon request. All used and unused study drug was returned to GSK (or a designee of GSK) at or before the end of the study.

In addition, any study inhaler that failed to function properly was identified to GSK personnel for return to GSK for testing. Details of the failure were documented in the eCRF. The subject returned the device to the clinic as soon as possible and avoided missing any doses if possible. The site called IVRS and obtained a new treatment pack number for this subject and dispensed a new study medication kit from the site's investigational product supply as instructed by IVRS.

#### 4.5.2. Treatment Assignment

At Visit 1, eligible subjects entered a 2-week run-in period during which they were permitted to use albuterol and/or continue using ipratropium as rescue medication.

At Visit 2, subjects who were eligible for randomization received double-blind medication for six weeks. Subjects were randomized to the FSC combination product 250/50mcg via DISKUS, SAL 50mcg via DISKUS or placebo via DISKUS in a 2:2:1

1  
2  
3 ratio. Subjects were instructed to administer the assigned double-blind medication once  
4 in the morning (1 inhalation) and once in the evening (1 inhalation) approximately 12  
5 hours apart.  
6

7 The first dose of study medication was administered in the clinic at Visit 2. The final  
8 dose of study medication was taken on the day before Visit 3. At Visit 3, subjects were  
9 not to take the morning dose of study medication before attending the clinic visit.  
10

### 11 12 **4.5.3. Blinding**

13 Study medication taken during the 6-week treatment phase was double-blind. Neither the  
14 subject nor the study physician knew which treatment the subject was receiving.  
15

16 The investigator or treating physician could unblind a subject's treatment assignment  
17 only in the case of an emergency, when knowledge of the study treatment was essential  
18 for the appropriate clinical management or welfare of the subject. Whenever possible,  
19 the investigator was to first discuss options with the GSK Medical Monitor or appropriate  
20 GSK study personnel before unblinding the subject's treatment assignment. If this was  
21 impractical, the investigator was to notify GSK as soon as possible, but without revealing  
22 the treatment assignment of the unblinded subject, unless that information was important  
23 for the safety of subjects in the study. The date and reason for the unblinding was to be  
24 recorded in the appropriate data collection tool.  
25  
26  
27  
28

29 GSK's Global Clinical Safety and Pharmacovigilance (GCSP) staff could unblind the  
30 treatment assignment for any subject with an SAE. If the SAE required that an expedited  
31 regulatory report be sent to one or more regulatory agencies, a copy of the report,  
32 identifying the subject's treatment assignment, was to be sent to clinical investigators in  
33 accordance with local regulations and/or GSK policy.  
34  
35

36 Subjects were withdrawn if their treatment code became unblinded.  
37

### 38 39 **4.5.4. Prior and Concomitant Medications and Non-Drug Therapies**

40 All concomitant medications taken during the study were recorded in the eCRF. The  
41 minimum requirement was that drug name and the dates of administration were recorded.  
42

43 All COPD medications used within 30 days of Visit 1 and all COPD and non-COPD  
44 medications used during the study run-in and treatment periods were recorded in the  
45 eCRF.  
46  
47  
48

### 49 50 **4.5.5. Treatment Compliance**

51 In accordance with local regulatory requirements, the investigator, designated site staff,  
52 or head of the medical institution (where applicable) documented the amount of GSK  
53 investigational product dispensed and/or administered to study subjects, the amount  
54 returned by study subjects, and the amount received from and returned to GSK. Product  
55 accountability records were maintained throughout the course of the study.  
56  
57  
58  
59  
60

The total number of doses taken by each subject was calculated from the dose counter start and stop dates for each device used. If a dose counter start count was missing then it was assumed to be 60. Percentage treatment compliance was calculated as  $100 \times (\text{total doses taken} / (2 \times (\text{treatment stop date} - \text{treatment start date} + 1)))$  and categorized as follows:  $< 80\%$ ,  $\geq 80\% - < 100\%$ ,  $100\%$ ,  $> 100\%$  to  $< 110\%$  or  $\geq 110\%$ .

#### 4.6. Compliance with SOBDA Diary Completion

Percentage compliance with SOBDA diary completion was calculated as  $100 \times (\text{number of days for which the SOBDA diary was completed} / \text{number of days between Visit 1 and Visit 3/premature discontinuation- PD})$ .

#### 4.7. Study Assessments and Procedures

Study assessments and procedures are detailed in [Table 6](#) of the study protocol.

##### 4.7.1. Questionnaire Validation and Healthcare Utilization Assessments

Key assessments were:

1. Shortness of Breath with Daily Activities (SOBDA) Questionnaire completed daily by electronic diary
2. Health Care Contact Question and Rescue Use Medication Question completed daily by electronic diary
3. Global Assessment of Shortness of Breath completed daily by electronic diary
4. Patient Global Assessment of Change (PGAC) Question completed weekly by electronic diary
5. Spirometry
  - forced expiratory volume in one second (FEV1)
  - forced vital capacity (FVC)
6. Chronic Respiratory Disease Questionnaire (CRQ-SAS)
7. Clinician Global Assessment of Dyspnea Severity (CGI-S)
8. Clinician Global Impression of Change Question (CGI-C)
9. Patient-completed and clinician-completed Modified Medical Research Council Dyspnea Scale (mMRC)
10. Patient Exit Evaluation questions at the completion of the study

Descriptions of the key study assessments are provided in Section 6.4.1 – Section 6.4.9 of the study protocol, and a full description of the timing and conduct of these assessments are provided in the respective Study Procedure Manuals (SPMs).

#### 4.7.2. Safety Assessments

Safety was monitored/assessed by AE, SAE and COPD exacerbation reporting. Definitions for AEs and SAEs and COPD exacerbations with reporting timelines are provided in Section 6.6 of the protocol.

Any abnormal laboratory test result (hematology, clinical chemistry, or urinalysis) or other safety assessment (e.g., vital signs measurements, physical exams), including those that worsened from Screening, and felt to be clinically significant in the medical and scientific judgment of the investigator, were recorded as AEs or SAEs.

#### 4.8. Data Quality Assurance

For this study, subject data were entered into GSK-defined electronic case report forms (eCRFs), transmitted electronically to GSK, and combined with data provided from other sources (e.g. diary data, laboratory data) in a validated data system.

Clinical data management was performed in accordance with applicable GSK standards and data cleaning procedures with the objective of removing errors and inconsistencies in the data which would otherwise impact on the analysis and reporting objectives, or the credibility of the Clinical Study Report. AEs and concomitant medications terms were coded using the Medical Dictionary for Regulatory Affairs (MedDRA) and GSKDrug, an internal validated medication dictionary. In all cases, subject initials were not collected nor transmitted to GSK.

#### 4.9. Statistical Analyses

A detailed description of statistical analyses for this study can be found in the Reporting and Analysis Plan (RAP). Analyses were performed using SAS version 9.1.3 on a UNIX platform. Graphics were produced using SAS and S-PLUS version 7 for Windows.

##### 4.9.1. Timings of Planned Analyses

All planned analyses were performed after the database had been frozen and subjects were unblinded. No interim analyses were planned or conducted.

##### 4.9.2. Sample Size Considerations

Sample size calculations were based on evaluation of the responsiveness of the SOBDA questionnaire. The sample size allows for comparison of SOBDA change scores for responders and non-responders (defined according to other study assessments as described in the RAP).

Sample size calculations assumed 90% power, a two-sided 5% significance level, and a standardized between-groups effect size of 0.5 (defined as the difference between responders and non-responders divided by the standard deviation of the difference). Under these assumptions, a minimum of 172 evaluable subjects was required. The effect

size of 0.5 is proposed to represent a moderate responsiveness, while an effect size of 0.8 is proposed to represent large responsiveness [Cohen, 1988; Kazis, 1989]. This sample size was increased to allow the exploratory comparison of SOBDA scores between active treatments. With the above assumptions and assuming a randomization ratio of 2:1 for active treatments: placebo, 128 evaluable subjects for FSC 250/50mcg and SAL 50mcg and 64 evaluable subjects for placebo were required (total of 320). Assuming that 90% of randomized subjects would provide data for this comparison, approximately 140 subjects were planned to be randomized to FSC 250/50mcg and SAL 50mcg, and 70 to placebo. Therefore approximately 350 subjects were planned to be randomized to provide 320 evaluable subjects. No sample size review was planned or conducted for this study.

#### 4.9.3. Analysis Populations

Three subject populations were identified:

##### All Subjects Enrolled Population

This population comprised all subjects who were screened or who completed written informed consent and experienced an SAE before the planned Visit 1 date. It was used for the tabulation and listing of reasons for screen failure and listings of COPD exacerbations and serious adverse events (SAEs) for non-randomized subjects.

##### Run-in Population

This population comprised all subjects who completed Visit 2, including those who were not randomized, were randomized but did not receive a dose of study medication and those who were randomized and received study medication. It was used for comparisons of Visit 1 and 2 data as part of the assessment of measurement properties of the SOBDA questionnaire, and for the tabulation and listing of reasons for run-in failure and summaries of demographic and baseline characteristics, questionnaire validation and healthcare utilization data, and also for summaries of pre-treatment adverse events.

This was an additional population from those specified in the protocol and was included so that all subjects who provided data for Visit 1 and Visit 2 could be included in any comparisons of those data.

##### Modified Intent-to-treat Population

This population comprised all subjects randomized to treatment who received at least one dose of study medication. Randomized subjects were assumed to have received study medication unless definitive evidence to the contrary existed. A true Intent-to-treat analysis would use the randomized treatment, but analyses on this population were 'modified' in that all data summaries and analyses were based on the actual treatment received, if it was different to the randomized treatment. This constituted the primary population for exploratory analyses of SOBDA scores by treatment.

If any subject received more than one treatment during the study, their data was to be reported according to the treatment they received for the longest period of time. A listing showing actual treatments received was to be produced.

#### **4.9.4. Comparisons of Interest**

##### **4.9.4.1. Assessment of Measurement Properties**

This section was modified from the protocol following the issue of the final FDA Guidance on ‘Patient-Reported Outcome Measures: Use in Medical Product Development to Support Labeling Claims’ (FDA, 2009). The protocol was based on the previous draft guidance, and analysis was updated to more closely follow the final guidance.

##### ***Consistency and validity***

The internal consistency of the SOBDA questionnaire was assessed and summary scores were compared with other endpoints collected, to confirm the reliability and validity of the instrument.

##### ***Responsiveness***

The responsiveness of the SOBDA questionnaire was assessed by comparing score changes between responders and non-responders. A responder was defined as a subject who had a response of ‘better’ or ‘much better’ (score of 4 or 5) on the weekly PGAC assessment. This comparison was repeated defining a responder as a subject who had a response of ‘better’ or ‘much better’ (score of 4 or 5) on the CGI-C at Visit 3.

Similar comparisons were performed for the CRQ-SAS dyspnoea domain score and the patient- and clinician-completed mMRC assessments and results compared with those from the SOBDA questionnaire comparisons.

##### ***Establish threshold for SOBDA responders and MID***

Anchor-based methods, distribution-based methods and examination of the cumulative proportions of responders and non-responders were all used to establish the threshold for SOBDA responders and the MID.

##### **4.9.4.2. Efficacy**

Summary measures for SOBDA score were compared between each active treatment and placebo. Formal comparisons between active treatments (i.e. between FSC and SAL) were not performed.

#### 4.9.5. General Considerations for Data Analyses

All programming was performed in a HARP environment using SAS Version 9.1.3.

#### 4.9.6. Multicentre Studies

Treatment by centre interaction was not formally investigated. Summaries and analyses were performed for all centres combined.

#### 4.9.7. Other Strata and Covariates

No stratification was applied in this study. Covariates to be used in statistical models are outlined in Section 11 and Section 12 of the RAP.

#### 4.9.8. Examination of Subgroups

No sub-groups of the populations were analysed, except as detailed in Section 11 of the RAP.

#### 4.9.9. Multiple Comparisons and Multiplicity

All statistical analyses were considered exploratory and no formal hypothesis tests were performed. No adjustment was made for multiplicity.

#### 4.9.10. Data Handling Conventions

Full details of analysis considerations and handling conventions can be found in the RAP Section 9.

#### 4.9.11. Study Population

Summaries of subject disposition, protocol deviations, demographic and baseline characteristics, and treatment compliance are described in the RAP Section 10.

#### 4.9.12. Assessment of Measurement Properties

Detailed statistical methods are provided in the RAP Section 11.

#### 4.9.13. Exploratory Efficacy Analyses

Details of the exploratory efficacy analyses are provided in the RAP Section 12.

#### 4.9.14. Safety Analyses

Detailed statistical methods are provided in the RAP Section 13.

## 5. STUDY POPULATION RESULTS

This was a study conducted in the US only and sponsored by GSK; a total of 40 centers in the United States randomized subjects to treatment (Table 1.06).

### 5.1. Subject Disposition

#### 5.1.1. Screen and Run-in Failures

Subject accountability for the total population is summarized in Table 1. Any subject who had at least one study procedure performed (in addition to signing a consent form), was assigned a subject number but who did not enter the run-in period was considered a screening failure. Additionally, if a subject completed written informed consent and experienced a SAE before the planned Visit 1 date, the subject was classified as a screen failure. The most common reason for screen failure was failure to meet inclusion/exclusion criteria. Run-in failures (subjects who entered the run-in period but then failed to be randomized, or who were randomized but did not receive a dose of study medication) were low (52 subjects, 12%, Table 1.04).

**Table 1 Screen Failures (ASQ112989 All Subjects Enrolled Population)**

| Screening Status                          | Number (%) of Subjects<br>Total N=547 |
|-------------------------------------------|---------------------------------------|
| Entered run-in                            | 418 (76)                              |
| Failed                                    | 129 (24)                              |
| Reasons for Screen Failure:               |                                       |
| Exacerbation                              | 1 (<1)                                |
| Did not meet inclusion/exclusion criteria | 126 (23)                              |
| Adverse event (unspecified)               | 0                                     |
| Investigator discretion                   | 1 (<1)                                |
| Withdrew consent                          | 1 (<1)                                |

Source: Table 1.03

The summary of inclusion/exclusion/randomization criteria deviations for screen/run-in failures (all subjects population) is given in Table 1.07. Severity of disease (102 subjects, 19%) was the most common inclusion criteria deviation, followed by absence of significant dyspnea by mMRC (13 subjects, 2%). The most common randomization criteria deviation was COPD exacerbation (21 subjects, 4%). All other deviations occurred in <1% of subjects.

In the modified intent-to-treat (mITT) population, less than 1% of subjects experienced inclusion /exclusion or randomization criteria deviations (Table 1.08).



## 5.1.2. Randomized Subjects

### 5.1.2.1. Study completion and withdrawal (all subjects)

A total of 366 subjects were randomized to treatment. One subject refused to take his study medication so a total of 365 subjects received treatment. There was not a significant difference in the percentage of withdrawals between subjects in the FSC 250/50 group compared with subjects in the SAL group or placebo (Table 2). The percentage of subjects receiving FSC 250/50 who withdrew from the study was similar to the percentage of subjects receiving SAL 50. The majority of subjects (>99%) completed either Visit 3 or the Premature Discontinuation visit as stipulated by the protocol (Table 1.02).

**Table 2 Summary of Subject Disposition (ASQ112989 mITT Population)**

| Completion status n(%)            | Placebo (n=75) | SAL 50mcg bid (n=151) | FSC 250/50mcg bid (n=139) | Total (n=365) |
|-----------------------------------|----------------|-----------------------|---------------------------|---------------|
| Completed                         | 69 (92)        | 141 (93)              | 126 (91)                  | 336 (92)      |
| Withdrawn                         | 6 (8)          | 10 (7)                | 13 (9)                    | 29 (8)        |
| Primary*/subreason for withdrawal |                |                       |                           |               |
| Adverse event                     | 3(4)           | 3 (2)                 | 7 (5)                     | 13(4)         |
| Lack of efficacy                  | 2 (3)          | 0                     | 1 (<1)                    | 3 (<1)        |
| Protocol deviation                | 0              | 0                     | 4 (3)                     | 4 (1)         |
| Study closed/terminated           | 0              | 1 (<1)                | 0                         | 1 (<1)        |
| Lost to follow-up                 | 0              | 0                     | 0                         | 0             |
| Investigator discretion           | 0              | 0                     | 0                         | 0             |
| Withdrew consent                  | 1 (1)          | 6 (4)                 | 1 (<1)                    | 8 (2)         |

\*Subjects may have only one primary reason for withdrawal  
Source: Table 1.05

## 5.2. Protocol Deviations

Protocol deviations considered to be major are defined in Section 9.2.1 of the RAP. A total of 26 subjects (7% of the mITT population) had major protocol deviations, with 14 (9%) of these occurring in the SAL 50 group and 9 (6%) occurring in the FSC 250/50 group. Three placebo subjects (4%) experienced major protocol deviations. Violation of an inclusion or exclusion criterion was considered a major protocol deviation in 1% of subjects or less in any group, and the most common major protocol deviation across all three groups was receipt of a prohibited medication within specified timeframes. A summary of protocol deviations is presented in Table 1.09, but all analyses were performed on the mITT population, which did not exclude subjects with protocol deviations.

The study blind was not broken during the study.

### 5.3. Populations Analyzed

Three subject populations were identified as previously described in Section 4.9.3. The distribution of subjects in each of these populations is provided in Table 3. The data summarized for the run-in population is grouped by run-in failures, subjects randomized to each of the three treatment groups and the total.

**Table 3 Summary of Subject Populations**

| Population                         | Placebo  | SAL<br>50mcg BID | FSC<br>250/50mcg BID | Total     |
|------------------------------------|----------|------------------|----------------------|-----------|
| All subjects enrolled              |          |                  |                      | 547       |
| Run-in                             |          |                  |                      | 418       |
| Randomized                         | 75       | 152              | 139                  | 366       |
| Modified intent-to-treat [1] n (%) | 75 (100) | 151 (<99)        | 139 (100)            | 365 (>99) |

Note: One subject was randomized to SAL 50mcg but refused to take his study medication and is therefore excluded from the mITT population.

1. Percentages are based on the number of subjects randomized.

Source: Table 1.01

### 5.4. Demographics and Baseline Characteristics

For the Run-in population, a slightly higher percentage of subjects were male (57%) than female (43%); the overall mean age was 61.1 years and the overall mean BMI was 28.28 kg/m<sup>2</sup>. A majority of subjects (>99%) were not of Hispanic or Latino ethnicity and the majority of subjects (90%) were white (Table 4).

**Table 4 Summary of Demographics (ASQ112989 Run-in Population)**

|            |                                       | Run-in<br>Failure<br>(N=52) | Placebo<br>(N=75) | SAL<br>50mcg bid<br>(N=152) | FSC<br>250/50mcg bid<br>(N=139) | Total<br>(N=418) |
|------------|---------------------------------------|-----------------------------|-------------------|-----------------------------|---------------------------------|------------------|
| Age (yrs)  | n                                     | 52                          | 75                | 152                         | 139                             | 418              |
|            | Mean                                  | 63.8                        | 62.8              | 60.1                        | 60.2                            | 61.1             |
|            | Sd                                    | 9.61                        | 9.82              | 9.58                        | 9.45                            | 9.65             |
| Sex        | Female                                | 27 (52)                     | 29 (39)           | 63 (41)                     | 60 (43)                         | 179 (43)         |
|            | Male                                  | 25 (48)                     | 46 (61)           | 89 (59)                     | 79 (57)                         | 239 (57)         |
| Ethnicity  | Hispanic or latino                    | 0                           | 0                 | 1 (<1)                      | 1 (<1)                          | 2 (<1)           |
|            | Not hispanic or latino                | 52 (100)                    | 75 (100)          | 151 (>99)                   | 138 (>99)                       | 416 (>99)        |
|            | African American/<br>African Heritage | 8 (15)                      | 9 (12)            | 12 (8)                      | 12 (9)                          | 41 (10)          |
|            | White                                 | 44 (85)                     | 65 (87)           | 140 (92)                    | 127 (91)                        | 376 (90)         |
|            | Asian                                 | 0                           | 1 (1)             | 0                           | 0                               | 1 (<1)           |
| Bmi (kg/m) | n                                     | 51                          | 75                | 152                         | 139                             | 417              |
|            | Mean                                  | 28.25                       | 26.55             | 28.45                       | 29.04                           | 28.28            |
|            | Sd                                    | 6.897                       | 6.131             | 6.159                       | 7.307                           | 6.680            |

Source: Table 1.10 and Table 1.11

#### 5.4.1. Current Medical Conditions

Current medical conditions were summarized for the run-in population and were similar between the run-in failures, the two treatment groups and placebo (Table 1.13). In total, most subjects (409 subjects- 98%) reported a current medical condition. For the treatment groups, the number of subjects having any condition was 138 (>99%) in the FSC 250/50 group, 149 (98%) in the SAL 50 group and 73 (97%) in the placebo group. The most commonly reported conditions across all groups were in the musculoskeletal and connective tissue disorders system organ class (SOC), ranging from 63-68% across groups (66% total). The second most common SOC was the cardiac disorders group, with conditions being reported by 50-67% of subjects (63% total), followed by the gastrointestinal disorders SOC, ranging from 35-47% (43% total). Respiratory, thoracic and mediastinal conditions were reported by 36-58% of subjects across the individual groups (41% total).

#### 5.4.2. Past Medical Conditions

The incidence of past medical conditions was similar between the run-in failure group, the two treatment groups and placebo (Table 1.14). Past medical conditions were reported by a total of 260 (62%) of subjects. For the treatment groups, the number of subjects having any condition was 91 (65%) in the FSC 250/50 group, 94 (62%) in the SAL 50 group and 43 (57%) in the placebo group.

The most commonly reported past medical conditions across all groups were in the reproductive system and breast disorders SOC, ranging from 19-29% across groups (24% total). The second most common SOC was the neoplasms (benign, malignant and unspecified) SOC, with conditions being reported by 13-19% of subjects (18% total). All other past medical conditions were reported in less than 10% of the total population in the SOCs summarized.

#### 5.4.3. COPD History and Exacerbation History

In the run-in population, the duration of COPD was  $\geq 1$  to  $< 5$  years for 141 (34%) of subjects and  $\geq 5$  to  $< 10$  years for 121 (29%) of subjects. Forty-six subjects (11%) reported a duration of  $\geq 10$  to  $< 15$  years and 15% percent of subjects had COPD histories of  $< 1$  year. The duration of COPD was similar between the treatment groups, ranging from 33-36% ( $\geq 1$  to  $< 5$  years), 27-31% ( $\geq 5$  to  $< 10$  years) and 11-22% for  $< 1$  year.

A slightly higher percentage of the run-in population (66%) was reported as having emphysema compared with 58% of subjects with reported chronic bronchitis: 65-69% across treatment groups (Table 1.15).

Most subjects (had not experienced an exacerbation within the 12 months prior to Visit 1. During this period, 9% subjects had experienced at least one exacerbation that was managed without extra medication and did not require hospitalization, 13% subjects experienced at least one exacerbation that required oral/systemic corticosteroids and/or antibiotics but did not require hospitalization, and 5% subjects experienced at least one exacerbation that required hospitalization (Table 1.16).

#### 5.4.4. Smoking History

Fifty-seven percent of run-in failures and 60-65% of subjects in the treatment groups were current smokers. The total mean number of years smoked for the Run-in population was 39.5 (SD=10.36) and was similar between Run-in failures and the treatment and placebo groups (Table 1.17).

The protocol inclusion required a history of smoking of at least 10 pack-years, and the mean number of pack years smoked ranged from 53.2 to 57.8 years (54.9 mean pack year history for the Run-in population).

#### 5.4.5. Lung Function

Pulmonary function was assessed at screening and demonstrated the physiologic features of COPD in the subject population. Reversibility was low, as was expected for this subject population. The results of the key pulmonary function tests performed at screening are summarized in Table 5.

**Table 5 Summary of Pulmonary Function at Screening (ASQ112989 mITT Population)**

| Mean Values                          | Run-in Failure<br>N=52 | Placebo<br>N=75 | SAL 50<br>N=152 | FSC 250/50<br>N=139 | Total<br>N=418 |
|--------------------------------------|------------------------|-----------------|-----------------|---------------------|----------------|
| FEV <sub>1</sub> (L) <sup>1</sup>    | 1.425                  | 1.469           | 1.536           | 1.532               | 1.509          |
| FEV <sub>1</sub> % Predicted         | 50.3                   | 49.4            | 50.2            | 49.5                | 49.9           |
| Reversibility to albuterol (%)       | 8.6                    | 16.7            | 11.7            | 14.5                | 13.1           |
| FVC (L) <sup>1</sup>                 | 2.771                  | 2.873           | 2.956           | 2.863               | 2.887          |
| FEV <sub>1</sub> /FVC % <sup>1</sup> | 55.7                   | 51.6            | 52.2            | 53.7                | 53.0           |

1. Post-albuterol  
Source: Table 1.18

#### 5.5. Prior and Concomitant Medications

Verbatim concomitant medication terms were coded to a dictionary term and grouped to an ATC class.

##### 5.5.1. COPD Medications

##### 5.5.1.1. COPD Medications before Run-In

In the Run-in Population, COPD medications were taken before the run-in by 77% of subjects. The most frequently reported COPD medications taken before the run-in were salbutamol (50% total), followed by ipratropium bromide (19% total) and salbutamol sulphate (17% total). Tiotropium bromide was taken by a total of 16% of subjects. All other medications were taken by less than 10% of the total number of subjects (Table 1.19).

### 5.5.1.2. COPD Medications during Run-In

Concomitant COPD medications were taken during the run-in period by 27% subjects in the Run-in population (Table 1.20). The most common concomitant COPD medications used were salbutamol (10% total, 8% to 12% across groups) and ipratropium bromide (9% total, 6% to 11% across groups). All other medications were taken by less than 5% of subjects.

### 5.5.1.3. COPD Medications during Study Treatment Period

In the mITT population, concomitant COPD medications were taken during the treatment period by 23% subjects in the FSC 250/50 group and 26% subjects in the SAL 50 group, compared with 24% of subjects in the placebo group (Table 1.21). The most common concomitant COPD medications used were ipratropium bromide (7 to 11% of subjects) and salbutamol (5 to 11% of subjects). Study-provided salbutamol is not recorded in this table. All other medications were taken by less than 10% of subjects in any treatment group. The percentage of subjects taking any concomitant COPD medications during the treatment period was similar between the treatment groups.

### 5.5.1.4. COPD Medications after Study Treatment Period

In the mITT population, COPD medications were taken after the treatment period by 50% subjects in the FSC 250/50 group and 52% subjects in the SAL 50 group compared with 51% of placebo subjects (Table 1.22). The most common concomitant COPD medications used were salbutamol, ipratropium bromide and tiotropium bromide. All other medications were taken by less than 10% of subjects in any group.

## 5.6. Exposure and Treatment Compliance

Treatment exposure for placebo, FSC 250/50 and SAL 50 is provided in Table 6. The duration of exposure to study medication was similar in each treatment group: mean (range) was 40 (1 to 55) days in the placebo group and 39.7 (1 to 52) days in the FSC 250/50 group and 40.5 (3 to 47) days in the SAL 50 group.

The majority of subjects were compliant with few subjects missing their doses or taking extra doses, and the mean overall percentage compliance for the mITT population was  $\geq 96.3\%$  (Table 1.26). No inhaler malfunctions were reported (Table 1.27).

**Table 6 Summary of Exposure to Study Drug (ASQ112989 mITT Population)**

|                              |            | Placebo<br>(N=75) | SAL 50mcg<br>(N=151) | FSC 250/50mcg<br>(N=139) |
|------------------------------|------------|-------------------|----------------------|--------------------------|
| Exposure (days) <sup>1</sup> | n          | 75                | 151                  | 139                      |
|                              | Mean       | 40.0              | 40.5                 | 39.7                     |
|                              | SD         | 8.18              | 6.04                 | 7.75                     |
|                              | Median     | 42.0              | 42.0                 | 42.0                     |
|                              | Min        | 1                 | 3                    | 1                        |
|                              | Max        | 55                | 47                   | 52                       |
| Range of exposure n(%)       | ≤7 days    | 2 (3)             | 1 (<1)               | 3 (2)                    |
|                              | 8-14 days  | 1 (1)             | 2 (1)                | 2 (1)                    |
|                              | 15-28 days | 2 (3)             | 6 (4)                | 5 (4)                    |
|                              | 29-42 days | 61 (81)           | 110 (73)             | 101 (73)                 |
|                              | >42 days   | 9 (12)            | 32 (21)              | 28 (20)                  |

1. Calculated as ((date of last dose- date of first dose) +1)  
Source: Table 4.01

## 6. ASSESSMENT OF MEASUREMENT PROPERTIES

The intent of the psychometric analyses conducted using data from this study was confirmatory, with the exception of the assessment of responsiveness and the establishment of a responder threshold. The SOBDA score used in these analyses is the score determined by the final 13-item SOBDA scoring algorithm, in which the subject is assigned a weekly mean SOBDA score ranging from 1-4 (greater scores indicating more severe breathlessness with daily activities) based on the mean of seven days of data (at least four of seven days must be complete for a weekly mean to be calculated), and each daily total score is computed from the mean of the scores on the 13 items (at least 7 out of 13 items must have non-missing response options for a daily mean to be calculated).

### 6.1. Reliability

#### 6.1.1. Internal Consistency

The internal consistency of the SOBDA total score on Day 1 was assessed using Cronbach's formula for coefficient alpha. Internal consistency is reported in Table 2.01. At Day 1 of the run-in period, the Cronbach's alpha value for the SOBDA total score was 0.89 for subjects with a score for each SOBDA item (n=344).

#### 6.1.2. Test-retest Reliability

Data from subjects whose breathlessness, as measured by the second weekly Patient Global Assessment of Change (PGAC), was classified as unchanged over the preceding seven days was used to estimate the test-retest reliability of the SOBDA total score between Week 1 and Week 2 of the Run-in. Reproducibility of the SOBDA was assessed

1  
2  
3 primarily through paired t-tests, Pearson's correlation and intraclass correlation  
4 coefficients.

5  
6 Test-retest reliability of SOBDA scores for 152 subjects with weekly SOBDA scores at  
7 Run-in Week 1 and Run-in Week 2 and reporting no change on the second weekly  
8 PGAC, i.e. on the day of or prior to Visit 2, are shown in Table 2.02. Pearson's  
9 correlation values and ICCs were both 0.94 and the effect size 0.01. A scatter plot of  
10 Week 1 Run-in versus Week 2 Run-in SOBDA scores among subjects with a response of  
11 'no change' on the second weekly PGAC is shown in Figure 2.01.  
12  
13

## 14 **6.2. Validity**

15  
16  
17 Validity refers to the extent to which the instrument measures what it is intended to  
18 measure.  
19

### 20 **6.2.1. Convergent Validity**

21  
22  
23 In this study, the relationship between SOBDA scores and selected patient-reported and  
24 clinical assessments of dyspnea severity or constructs hypothetically related to dyspnea  
25 severity were examined for convergent validity.  
26  
27

#### 28 **6.2.1.1. Relationship between SOBDA Scores and mMRC Score**

29  
30 Correlations between mean baseline SOBDA scores and mMRC scores at Visit 2 are  
31 reported in Table 2.03. The Spearman rank order correlation coefficients were 0.29 for  
32 patient-reported scores, and 0.24 for clinician-reported scores. Scatter plots of Visit 2  
33 clinician- and patient-mMRC scores compared with SOBDA baseline scores are shown  
34 in Figure 2.02 and Figure 2.03, respectively.  
35  
36

#### 37 **6.2.1.2. Relationship between SOBDA and CRQ-SAS Dyspnea Domain and CGI-S**

38  
39  
40 The relationship between baseline SOBDA scores and subjects' reports, using the  
41 Chronic Respiratory Disease Questionnaire (CRQ-SAS) dyspnea domain score at Visit 2  
42 was assessed via Pearson's correlation coefficient. Correlations with the CRQ-SAS  
43 dyspnea domain are expected to be negative since increasing symptom burden is  
44 associated with higher SOBDA scores but with lower CRQ-SAS scores. The relationship  
45 between baseline SOBDA scores and the Clinician Global Impression of Dyspnea  
46 Severity (CGI-S) at Visit 2 was assessed via Spearman's rank order correlation  
47 coefficient.  
48  
49  
50

51  
52 Correlation coefficients for the relationship between SOBDA baseline score and the  
53 CRQ-SAS dyspnea domain and CGI-S are shown in Table 2.03. Correlation with the  
54 CRQ-SAS dyspnea domain score was -0.68, exceeding the predicted value of -0.30.  
55 Correlation with the CGI-S was 0.24, approaching but not meeting the test criteria.  
56 Scatter plots of CRQ-SAS dyspnea scores and CGI-S scores at Visit 2 compared with  
57 baseline SOBDA scores are shown in Figure 2.04 and Figure 2.05, respectively.  
58  
59  
60

## 6.2.2. Known Group Validity

Known group validity refers to the extent to which scores from an instrument differentiate groups of subjects that are known to differ on the underlying construct. In the case of the SOBDA, the instrument should differentiate subjects with varying levels of dyspnea severity.

### 6.2.2.1. Discrimination by mMRC Rating – Clinician and Patient

A comparison of SOBDA baseline scores by Visit 2 mMRC ratings (obtained separately from clinician and subject) was conducted using ANCOVA models that adjusted for age, sex, and FEV<sub>1</sub> % predicted measured during the screening visit (Table 2.05 and Table 2.07). Least Square (LS) mean SOBDA baseline scores were found to increase as mMRC clinician and patient ratings increased. Better discrimination in SOBDA score was observed using mMRC patient ratings compared with mMRC clinician ratings.

### 6.2.2.2. Discrimination by CGI-S Rating

A comparison of baseline SOBDA scores by Visit 2 CGI-S ratings was also conducted using ANCOVA models adjusting for age, sex, and screening FEV<sub>1</sub>% predicted (data summary and analyses shown in Table 2.08 and Table 2.09, respectively). As CGI-S categories increased in severity, SOBDA scores also increased.

## 6.3. Responsiveness

### 6.3.1. SOBDA Weekly Score Analysis by Patient Global Assessment of Change

ANCOVA was used to compare changes from the previous week to the current week's SOBDA score during the six-week study treatment period in responders and non-responders, defined according to the corresponding weekly PGAC assessment. Responders were defined as subjects with a rating of "better" or "much better" on the PGAC at the relevant week; non-responders were defined as subjects with a response of "much worse", "worse" or "no change" on the PGAC. The difference between responders and non-responders in the change from the previous week to the current week's SOBDA score was tested using ANCOVA, controlled for age, sex, and the previous week's SOBDA score. These analyses were repeated using patient global assessment of change ratings at Days 8, 15, 22, 29, 36 and 43. Weekly SOBDA change scores were lower for PGAC responders compared with PGAC non-responders (Table 7). Weekly SOBDA change scores between groups were statistically significant each week with the exception of Week 6. However, it is noted that about half of subjects did not complete the PGAC at Day 43.



**Table 7 SOBDA Change Score Analysis by Weekly PGAC**

|                                         | Day 8                | Day 15               | Day 22               | Day 29               | Day 36               | Day 43*               |
|-----------------------------------------|----------------------|----------------------|----------------------|----------------------|----------------------|-----------------------|
| Responders (n) <sup>1</sup>             | 105                  | 91                   | 83                   | 62                   | 77                   | 31                    |
| Non-responders (n) <sup>2</sup>         | 188                  | 212                  | 216                  | 223                  | 200                  | 88                    |
| Mean difference between groups (95% CI) | 0.24<br>(0.18, 0.31) | 0.12<br>(0.06, 0.19) | 0.11<br>(0.06, 0.16) | 0.11<br>(0.06, 0.17) | 0.13<br>(0.08, 0.18) | 0.06<br>(-0.03, 0.15) |
| p-value <sup>3</sup>                    | <0.001               | <0.001               | <0.001               | <0.001               | <0.001               | 0.180                 |

1. Subjects with a rating of "better" or "much better" on the PGAC.
2. Subjects with a response of "much worse", "worse" or "no change" on the PGAC.
3. Comparison of change from previous to current week's SOBDA scores for responders and non-responders, based on ANCOVA adjusted for age, sex and previous week's SOBDA score.

\* Not all subjects completed PGAC at Day 43

NOTE: Lower SOBDA scores indicate less shortness of breath with daily activities

Source: Table 2.11, Table 2.13, Table 2.15, Table 2.17, Table 2.19, and Table 2.21

### 6.3.2. SOBDA Last Treatment Week Score Analysis

ANCOVA was used to compare changes in mean SOBDA scores during the last week of treatment in responders and non-responders controlling for age, sex, and the baseline week SOBDA score. Analyses were conducted using definitions of responders and non-responders based on the PGAC, Clinician Global Impression of Change (CGI-C), CRQ-SAS dyspnea domain, clinician-completed mMRC and patient-completed mMRC conducted at Visit 3 or Premature Discontinuation.

Analysis of SOBDA last treatment week scores by PGAC response at Visit 3/PD is shown in Table 2.23. PGAC responders were defined as subjects with a rating of "better" or "much better" on the PGAC; non-responders were defined as subjects with a response of "much worse," "worse" or "no change" on the PGAC. The difference between responders (n=45) and non-responders (n=106) was not statistically significant but the change from baseline to SOBDA last treatment week score change was numerically lower for responders (lower SOBDA scores indicate less shortness of breath with daily activities). About half of the subjects did not complete the PGAC at Visit 3/PD owing to a logistical oversight at the sites, where the PGAC was not administered as instructed on the electronic device at the final visit.

Analysis of SOBDA last treatment week scores by CGI-C response at Visit 3/PD is shown in Table 2.25. A CGI-C responder was defined as a subject who had a response of "better" or "much better," and a non-responder was defined as a subject who had a response of "much worse," "worse" or "no change." The difference in change from baseline to SOBDA last treatment week score was significantly lower for CGI-C responders (n=120) versus non-responders (n=181) (difference=0.24, p<0.001). Figure 2.06 shows the difference in mean SOBDA scores across six weeks of treatment for CGI-C responders and non-responders.

1  
2  
3  
4  
5  
6  
7  
8  
9  
10  
11  
12  
13  
14  
15  
16  
17  
18  
19  
20  
21  
22  
23  
24  
25  
26  
27  
28  
29  
30  
31  
32  
33  
34  
35  
36  
37  
38  
39  
40  
41  
42  
43  
44  
45  
46  
47  
48  
49  
50  
51  
52  
53  
54  
55  
56  
57  
58  
59  
60

Analysis of SOBDA last treatment week scores by the CRQ-SAS dyspnea domain at Visit 3/PD is shown in Table 2.27. A CRQ-SAS dyspnea domain responder was defined as a subject who had a score increase of 0.5 units or more for the dyspnea domain of the CRQ-SAS between Visit 2 and Visit 3/PD. A non-responder was defined as a subject who had a decrease in score, or an increase of less than 0.5 units. The difference in change from baseline to SOBDA last treatment week score was significantly lower for CRQ-SAS responders (n=117) versus non-responders (n=184) (difference=0.30, p<0.001). Figure 2.07 shows the difference in mean SOBDA scores across six weeks of treatment for CRQ-SAS dyspnea domain responders and non-responders.

Analysis of SOBDA last treatment week scores by clinician-rated mMRC response at Visit 3/PD is shown in Table 2.29. A clinician-completed mMRC responder was defined as a subject who had a score decrease of one unit or more between Visit 2 and Visit 3/PD. A non-responder was defined as a subject who had the same or an increase in score. The difference in SOBDA last treatment week score for responders (n=91) versus non-responders (n=210) was not statistically significant (difference=0.03; p=0.535). Figure 2.08 shows the difference in mean SOBDA scores across six weeks of treatment for clinician-rated responders and non-responders.

Analysis of SOBDA last treatment week scores by patient-rated mMRC response at Visit 3/PD is shown in Table 2.31. A patient-completed mMRC responder was defined as a subject who had a score decrease of one unit or more between Visit 2 and Visit 3/PD. A non-responder was defined as a subject who had the same or an increase in score. The difference in SOBDA last treatment week score for responders (n=92) and versus non-responders (n=209) was not statistically significant (difference=0.08; p=0.129). Figure 2.09 shows the difference in mean SOBDA scores across six weeks of treatment for patient-rated mMRC responders and non-responders.

#### 6.4. Threshold for SOBDA Responders and Minimally Important Difference

The thresholds for defining a responder using the SOBDA were explored using the modified intent to treat population. Anchor-based methods were used to establish a preliminary minimally important difference (MID) for SOBDA mean score changes within a subject, which was also considered the threshold for SOBDA responders to allow comparison of proportions of responders in different categories.

##### 6.4.1. SOBDA Weekly Scores

The on-treatment SOBDA weekly summary scores and the change from the previous week's score were summarized for each level of PGAC response. The changes in SOBDA scores from baseline to Week 1 (using the Week 1 PGAC grouping), Week 1 to Week 2 (using the Week 2 PGAC grouping); Week 2 to Week 3 (using the Week 3 PGAC grouping); Week 3 to Week 4 (using the Week 4 PGAC grouping); Week 4 to Week 5 (using the Week 5 grouping); and Week 5 to Week 6 (using the Week 6 grouping) were summarized. Mean, SD, median, minimum and maximum change in SOBDA scores from the previous week are presented in Table 2.32- Table 2.37. The mean change in SOBDA scores from the previous week among subjects who rated their condition as

“better” using the PGAC were -0.26 at Week 1, -0.08 at Week 2, -0.08 at Week 3, -0.10 at Week 4, -0.08 at Week 5, and -0.05 at Week 6.

The change in score from the previous week’s to the current week’s SOBDA weekly score (x-axis) were plotted against the cumulative proportion of subjects who show such change (y-axis), with a line for each of the responses to the corresponding PGAC assessment (Figure 2.10- Figure 2.15).

#### 6.4.2. SOBDA Last Treatment Week Score

The change in SOBDA scores from baseline to last treatment week were summarized by CGI-C groupings at Visit 3/PD (Table 2.38), CRQ-SAS dyspnea domain groupings (see Section 6.3.2 for categories) at Visit 3/PD (Table 2.39), and FEV1 groupings at Visit 3/PD (Table 2.40) (for FEV1, subjects were grouped as "No change or worse" if they had a change from baseline of <50mL, "Better" if they had a change of 50-<100mL, and "Much better" if they had a change of ≥100mL).

Subjects who were classified as “better” based on the CGI-C, CRQ-SAS dyspnea domain, and FEV1 had a mean change score on the SOBDA of -0.25, -0.13, and -0.16, respectively, at the last treatment week compared to baseline.

For each anchor (CGI-C, CRQ-SAS dyspnea domain and FEV1), the change from baseline in the SOBDA last treatment week score (x-axis) was plotted against the cumulative proportion of subjects who showed such changes (y-axis), with a line for each response category of the anchor. These plots were repeated for the percentage change from baseline in the SOBDA last treatment week score; plots for the CGI-S, CRQ-SAS dyspnea and FEV1 response categories at Visit 3/PD are shown in Figure 2.16 and Figure 2.17, Figure 2.18 and Figure 2.19, and Figure 2.20 and Figure 2.21, respectively.

## 7. EXPLORATORY EFFICACY

### 7.1. Threshold for SOBDA Responders and Minimally Important Difference by Treatment Group

A summary of SOBDA score response by treatment group for each treatment week is shown in Table 3.04. Proportions of subjects are shown using a threshold of SOBDA score reduction of -0.1 and -0.2. These values were based on the data from the cumulative distribution function plots and the findings and interpretation of the anchor - based MID analysis. Because a single value was not agreed, the table generated is a variation on that provided in the RAP.

Across all time points, the proportion of subjects crossing the threshold (both -0.1 and -0.2) was numerically higher for the salmeterol group compared with placebo and numerically higher for the FSC group compared with the salmeterol group (Placebo < SAL 50mcg bid < FSC 250/50 mcg BID).

1  
2  
3 Table 3.05 summarizes the change from baseline in SOBDA last treatment week score by  
4 treatment group. After adjusting for age, sex and SOBDA baseline score, the difference  
5 between FSC 250/50 and placebo was -0.09 (95% CI: -0.23, 0.05); between SAL 50 and  
6 placebo was 0.03 (95% CI: -0.11, 0.16 which did not meet the potential MID range of  
7 -0.1 to -0.2.  
8  
9

## 10 7.2. SOBDA Diary

11  
12 SOBDA score results, change from baseline in SOBDA scores and the analysis of change  
13 from baseline in these scores will be reported subsequent to agreement with the FDA on  
14 the appropriate scoring system for the SOBDA questionnaire as previously described in  
15 Section 6.  
16  
17

## 18 7.3. Rescue Medication Use

19  
20 At Baseline, the total mean number of puffs of rescue medication per day was 4.9 and  
21 ranged from 4.3 to 5.2 puffs per day in the treatment and placebo groups. By treatment  
22 Week 6, the total mean number of puffs per day was 3.8 and ranged from 3.5-4.0 in the  
23 treatment and placebo groups (Table 3.06).  
24  
25

26  
27 The change from Baseline in mean number of puffs per day is summarized in Table 3.07  
28 and shows that at the last treatment week, the total mean number of puffs per day had  
29 decreased by 0.9, with the greatest mean decrease of 1.3 puffs/day being observed in the  
30 FSC 250/50 group. Over time (Week 1 through Week 6), the mean decrease in puffs/day  
31 in the placebo group was minimal (increase of 0.1 to decrease of 0.3), while the need for  
32 rescue medication in the SAL 50 and FSC 250/50 groups exhibited a sustained decrease  
33 after Week 1, ranging from 0.4 to 0.8 puffs/day in the SAL 50 group and 1.1 to 1.6  
34 puffs/day for the FSC 250/50 group at any given timepoint.  
35  
36

## 37 7.4. Rescue-Free Days

38  
39 At Baseline, the total mean number of rescue-free days was 21.2 and ranged from 21.5 to  
40 22.7 days in the treatment and placebo groups. By treatment Week 6, the total mean  
41 number of rescue-free days was 31.1 and ranged from 22.4-36.2 in the treatment and  
42 placebo groups (Table 3.08).  
43  
44

45  
46 The change from Baseline in mean number of rescue-free days is summarized in  
47 Table 3.09 and shows that at the Last treatment week, the total mean number of rescue-  
48 free days had increased by 7.1 and the greatest mean increase of 10.7 rescue-free days  
49 was seen in the FSC 250/50 group. Over time, the mean change in rescue-free days in  
50 the placebo group did not demonstrate a consistent trend (mean number of days ranging  
51 from -0.2 to 2.3), while the increase in rescue-free days in the SAL 50 and FSC 250/50  
52 groups exhibited continuing improvements after Week 1, increasing from 2.2 to 6.8 days  
53 in the SAL 50 group and 7.4 to 11.7 days for the FSC 250/50 group from Week 1 through  
54 Week 6.  
55  
56  
57  
58  
59  
60

## 7.5. Global Assessment of Shortness of Breath

The global assessment of shortness of breath was completed by subjects on a daily basis during the two week run-in period and for 6 weeks post-randomization (56 consecutive days) and is summarized in Table 3.10 and shows that throughout the Run-in and treatment periods, the majority of subjects reported scores of 2 (slightly) or 3 (moderately).

## 7.6. Patient Global Assessment of Change

The PGAC was completed by subjects on a weekly basis, indicating their assessments on a numerical scale with 1=much worse, 2=worse, 3=no change, 4= better and 5= much better compared to the previous week and is summarized in Table 3.11

The summary of PGAC response is provided in Table 3.12. Responders were defined as subjects who had a score of 4 or 5 on the weekly PGAC assessments, indicating an improvement from their previous week's response.

The percentage of subjects considered responders at Study Day 8 was 31% for both the placebo and SAL 50 group and 42% for the FSC 250/50 group. The proportion of responders was generally higher for active treatments compared with placebo at each subsequent week, indicating that subjects receiving active treatment continued to improve more than those receiving placebo throughout the study.

## 7.7. Summary of patient exit evaluation

The majority of subjects did not report having difficulties in using the eDiaries or answering the eDiary questions. In the mITT population, the majority of subjects ( $\geq 72\%$ ) reported being 'very confident' in using the electronic diary and  $\geq 85\%$  reported 'very good' or 'good' for ease of use of the electronic diary. In the mITT population, 62% of subjects reported that they would be willing to complete the eDiary for 6 months or longer and 89% reported they would be 'very willing' or 'willing' to participate using the eDiary again. The summary of all patient exit evaluations regarding use of the eDiary is given in Table 3.13.

## 7.8. Lung Function

FEV<sub>1</sub> responders were defined as subjects who had a change from Visit 2 to Visit 3/PD of 100mL or more. An FEV<sub>1</sub> non-responder was defined as a subject who had a change of < 100mL. The summary of mean FEV<sub>1</sub> values is given in Table 3.14 and the summary of change from baseline in these values is given in Table 3.15. The mean change in the placebo and SAL 50 group did not meet the definition for response, with mean changes of 1ml and 61ml, respectively, while the mean change in the FSC 250/50 group did meet the definition (mean change in FEV<sub>1</sub> =138ml).

The change from FEV<sub>1</sub> from Visit 2 to Visit 3/PD was categorized into a 3-point response scale. The 3-point scale has 'no change or worse' defined as a change of <50mL, 'better'

1  
2  
3 as a change of 50-<100mL and ‘much better’ as a change of 100mL or more. The  
4 summary of this data is provided in Table 3.16 and shows that the majority of subjects in  
5 the SAL 50 and FSC 250/50 groups had a change of ‘better’ or ‘much better’ (55% and  
6 62%, respectively, compared with the placebo group, where only 38% of subject had a  
7 change of ‘better’ or ‘much better’. Forty-nine percent of FSC 250/50 subjects were  
8 considered responders, compared with 38% of SAL 50 subjects and 25% of placebo  
9 subjects.  
10

11  
12 Visit 2 and Visit 3/PD FVC values are summarized in Table 3.17, with a summary of the  
13 change from Baseline in FVC at Visit 3/PD being provided in Table 3.18 and showing  
14 that mean FVC values decreased by 7ml in the placebo group and increased by 81ml in  
15 the SAL 50 group and 180ml in the FSC 250/50 group.  
16

## 17 18 **7.9. CRQ-SAS Domain Scores**

19  
20 The summary of CRQ-SAS dyspnoea domain scores (emotional function, mastery,  
21 Dyspnea and Fatigue) assessed at Visit 2 and Visit 3/PD is presented in Table 3.19 and  
22 the summary of change from Baseline at Visit 3/PD is given in Table 3.20.  
23

24  
25 The greatest mean changes for dyspnea and fatigue were seen in the FSC 250/50 group  
26 (0.4 and 0.3, respectively) but did not change by the minimum clinically important  
27 difference (0.5 units). The mean changes from baseline in Emotional Function were  
28 similar between placebo and the two treatment groups (0.2 and 0.1), as were the mean  
29 changes from baseline for Mastery (0.2 for placebo, 0.3 for SAL 50 and 0.4 for FSC  
30 250/50).  
31

32  
33 The summary of the dyspnoea domain response by 3-point response category (no change  
34 or worse, better or much better) is provided in Table 3.21 and shows that the SAL 50 and  
35 FSC 250/50 groups reported a change of ‘better’ or ‘much better’ (56% and 65%,  
36 respectively, compared with the placebo group, where only 53% of subject reported a  
37 change of ‘better’ or ‘much better’. Thirty-four percent of placebo subjects were rated as  
38 responders, compared with 37% of SAL 50 subjects and 46% of FSC 250/50 subjects.  
39  
40

## 41 42 **7.10. Clinician Global Impression of Change**

43  
44 Visit 2 and Visit 3/PD CGI-S scores are summarized in Table 3.22, with a summary of  
45 the CGI-S values at Visit 3/PD being provided in Table 3.23. The majority of subjects in  
46 both treatment groups and placebo reported either ‘no change’ or ‘better’ on the CGI-C  
47 response scale, with 49% of FSC 250/50 subjects meeting the definition of ‘responder’,  
48 compared with 37% of SAL 50 subjects and 26% of placebo subjects.  
49  
50

## 51 52 **7.11. Patient-completed Dyspnea Scale**

53  
54 Screening mean values for the patient completed mMRC dyspnea scale were identical  
55 (2.3) for the two treatment groups and placebo and decreased for both treatment groups  
56 and placebo at the Visit 3/PD assessment, with the smallest mean value (1.6) being  
57 observed in the FSC 250/50 group, compared with means of 1.8 and 1.7 for the SAL 50  
58  
59  
60

1  
2  
3 and placebo groups, respectively (Table 3.24). Thirty-five percent of the FSC 250/50  
4 subjects met the definition of 'responder' for the patient-completed mMRC dyspnea  
5 scale, compared with 30% of SAL 50 subjects and 22% of placebo subjects (Table 3.25).  
6  
7

## 8 **7.12. Clinician-completed mMRC Dyspnea Scale**

9  
10 Screening mean values for the clinician-completed mMRC dypnea scale were similar to  
11 those of the patient-completed values, ranging from 2.4-2.5, and decreased to 2.0 for the  
12 FSC 250/50 group at Visit 3/PD, compared with 2.2 for SAL 50 and placebo  
13 (Table 3.26). Thirty-three percent of the FSC 250/50 subjects met the definition of  
14 'responder' for the physican-completed mMRC dyspnea scale, compared with 28% of  
15 SAL 50 subjects and 23% of placebo subjects (Table 3.27).  
16  
17  
18  
19  
20  
21  
22  
23  
24  
25  
26  
27  
28  
29  
30  
31  
32  
33  
34  
35  
36  
37  
38  
39  
40  
41  
42  
43  
44  
45  
46  
47  
48  
49  
50  
51  
52  
53  
54  
55  
56  
57  
58  
59  
60

## 8. HEALTHCARE UTILIZATION

On the electronic daily diary, subjects were asked, “Did you have contact with a doctor or nurse about your lung condition today?” If the subject answered “Yes,” they were prompted to give information about the type of clinician contact on the electronic diary. The study sites completed further details of the healthcare contacts on the healthcare utilization worksheet. All relevant details of any subject healthcare provider contact such as phone calls, unscheduled clinic visits, ER visits, or hospitalizations were recorded on the healthcare utilization worksheets. The data included date of contact, type of contact, reason for contact, and length of visit (as appropriate).

### 8.1. Summary of Healthcare Provider Contacts via Electronic Daily Diary

The percentage of subjects having contact with a healthcare provider on any day during the Run-in was 30% for the Run-in population and was similar for run-in failures, the treatment groups and placebo (24% to 35%). During the Run-in, the highest proportion of subjects reported clinic visits for regular checkups (71% total, 50% to 74% between groups). Seventeen percent of subjects in this population had clinic visits for a change in symptoms or treatment (11% to 38% between groups) and 15% of subjects in the population made telephone contacts to the provider. Six percent or fewer subjects in any group went to emergency rooms, urgent care centers or were admitted to hospital.

During treatment, 27% of subjects had contact with a healthcare provider on any day and the percentages of these contacts were similar between the groups (24% to 31%). While being treated by a healthcare provider, the majority of subjects in this population (63%) contacted a provider for a regular check-up (62% to 65% between groups) and 33% of subjects in this population had clinic visits for a change in symptoms or treatment (30% to 36% between groups) and 11% of subjects in the population made telephone contacts to the provider. Fifteen percent or fewer subjects in any group went to emergency rooms, urgent care centers or were admitted to hospital (Table 5.01).

### 8.2. Healthcare Utilization during Run-in

Subject contact with healthcare providers during Run-in was low. Six percent (25 subjects) were recorded as having a Healthcare Utilization , with 5% (20 subjects) making 1 office visit and <1% making 2 office visits (no subjects reported >2 visits). Additionally, <1% of subjects (4 subjects) reported making 1 phone call to a provider. Three subjects (<1%) made 1 emergency room visit and one subject reported >2 emergency room visits. No subjects in any group reported home/day visits or home/night visits. The total length of contact for the majority (>99%) of subjects was 0 to 3 days, with 1 subject (<1%) having contact for 3 to 7 days and 3 subjects (<1%) having contact for 7 to 14 days (Table 5.02).



### 8.3. Healthcare Utilization during Treatment

During treatment, the majority of subjects (87%) did not report a Healthcare Utilization, and the percentages of those subjects who did report a Healthcare Utilization were similar between placebo and treatment groups. Individual types of utilizations are detailed in Table 8.

**Table 8 Summary of Unscheduled Healthcare Utilization during Treatment <sup>1</sup> (ASQ112989 mITT population)**

| n (%)                                         | Placebo (N=75) | SAL 50mcg (N=151) | FSC 250/50mcg (N=139) | Total (N=365) |
|-----------------------------------------------|----------------|-------------------|-----------------------|---------------|
| Unscheduled healthcare utilization            |                |                   |                       |               |
| n                                             | 75             | 151               | 139                   | 365           |
| Yes                                           | 11 (15)        | 19 (13)           | 17 (12)               | 47 (13)       |
| No                                            | 64 (85)        | 132 (87)          | 122 (88)              | 318 (87)      |
| Total number of telephone calls               |                |                   |                       |               |
| 0                                             | 70 (93)        | 147 (97)          | 135 (97)              | 352 (96)      |
| 1                                             | 3 (4)          | 3 (2)             | 3 (2)                 | 9 (2)         |
| 2                                             | 1 (1)          | 0                 | 1 (<1)                | 2 (<1)        |
| >2                                            | 1 (1)          | 1 (<1)            | 0                     | 2 (<1)        |
| Total number of office/practice visits        |                |                   |                       |               |
| 0                                             | 67 (89)        | 135 (89)          | 127 (91)              | 329 (90)      |
| 1                                             | 5 (7)          | 14 (9)            | 8 (6)                 | 27 (7)        |
| 2                                             | 1 (1)          | 2 (1)             | 3 (2)                 | 6 (2)         |
| >2                                            | 2 (3)          | 0                 | 1 (<1)                | 3 (<1)        |
| Total number of urgent care/outpatient visits |                |                   |                       |               |
| 0                                             | 74 (99)        | 151 (100)         | 136 (98)              | 361 (99)      |
| 1                                             | 1 (1)          | 0                 | 3 (2)                 | 4 (1)         |
| Total number of emergency room visits         |                |                   |                       |               |
| 0                                             | 71 (95)        | 145 (96)          | 137 (99)              | 353 (97)      |
| 1                                             | 4 (5)          | 6 (4)             | 2 (1)                 | 12 (3)        |
| Total number of days spent in intensive care  |                |                   |                       |               |
| 0                                             | 75 (100)       | 150 (>99)         | 139 (100)             | 364 (>99)     |
| 1                                             | 0              | 1 (<1)            | 0                     | 1 (<1)        |
| Total number of days spent in a general ward  |                |                   |                       |               |
| 0                                             | 72 (96)        | 146 (97)          | 138 (>99)             | 356 (98)      |
| 1                                             | 1 (1)          | 0                 | 0                     | 1 (<1)        |
| 2                                             | 0              | 0                 | 0                     | 0             |
| >2                                            | 2 (3)          | 5 (3)             | 1 (<1)                | 8 (2)         |
| Total length of contact (days)                |                |                   |                       |               |
| 0-3                                           | 72 (96)        | 145 (96)          | 135 (97)              | 352 (96)      |
| >3-7                                          | 1 (1)          | 4 (3)             | 1 (<1)                | 6 (2)         |
| >7-14                                         | 1 (1)          | 1 (<1)            | 2 (1)                 | 4 (1)         |
| >14                                           | 1 (1)          | 1 (<1)            | 1 (<1)                | 3 (<1)        |

1. Reported for one or more subjects in any group

Daily healthcare utilization is recorded by the subject on the eDiary and unscheduled healthcare utilization is recorded by the site on a worksheet. The data do not always match

Source: Table 5.03

## 9. SAFETY RESULTS

For these safety results, Adverse Events (AE) were coded using the standard GSK dictionary (MedDRA) and grouped by body system for the summary tables. Within each treatment group, AEs were summarized by frequency and percentage of total subjects by SOC and preferred term. Because safety was not a primary or secondary endpoint of the study, only those events which occurred in  $\geq 3\%$  of subjects are discussed in the core text. All adverse events, regardless of incidence level, are summarized in the ICH tables.

### 9.1. Adverse Events

#### 9.1.1. Adverse Event Overview

The overall incidence of subjects reporting AEs occurring during the treatment period was low and comparable across all three groups. The number of subjects reporting AEs related to study treatment or which lead to discontinuation of treatment or dose reduction was low. Few subjects experienced an SAE that was related to treatment and the single fatal SAE was not ascribed to treatment (Table 9).

**Table 9 On-treatment Adverse Event Overview (ASQ112989 mITT Population)**

|                                                      | Placebo<br>(N=75) | SAL 50mcg<br>(N=151) | FSC 250/50mcg<br>(N=139) |
|------------------------------------------------------|-------------------|----------------------|--------------------------|
| ANY AE                                               | 14 (19)           | 34 (23)              | 37 (27)                  |
| AE related to study treatment                        | 3 (4)             | 9 (6)                | 4 (3)                    |
| AE leading to permanent discontinuation of treatment | 3 (4)             | 3 (2)                | 7 (5)                    |
| AE leading to dose reduction                         | 0                 | 0                    | 0                        |
| AE leading to dose interruption/delay                | 1 (1)             | 3 (2)                | 0                        |
| Any SAE                                              | 4 (5)             | 5 (3)                | 3 (2)                    |
| SAE related to study treatment                       | 2 (3)             | 1 (<1)               | 0                        |
| Fatal SAE                                            | 0                 | 0                    | 1 (<1)                   |
| Fatal SAE related to study treatment                 | 0                 | 0                    | 0                        |

Source: Table 4.02

#### 9.1.2. On-Treatment Adverse Events

The most commonly reported AEs in the respiratory, thoracic and mediastinal disorders SOC were COPD and dyspnoea. In the nervous system disorders SOC, headache was the most commonly reported AE. Respiratory tract infection was also reported by 2 subjects (3%) in the placebo group. No other individual AEs in any other SOC occurred in  $\geq 3\%$  of subjects in the placebo or treatment groups. A summary of the most common adverse events across all SOCs by treatment is provided in Table 10.

**Table 10 Summary of Common\*On-treatment Adverse Events (ASQ112989 mITT Population)**

|                                       | Placebo<br>(N=75) | SAL 50mcg<br>(N=151) | FSC 250/50mcg<br>(N=139) |
|---------------------------------------|-------------------|----------------------|--------------------------|
| ANY EVENT                             | 14 (19)           | 34 (23)              | 37 (27)                  |
| Chronic obstructive pulmonary disease | 4 (5)             | 3 (2)                | 0                        |
| Dyspnoea                              | 2 (3)             | 4 (3)                | 1 (<1)                   |
| Headache                              | 2 (3)             | 6 (4)                | 5 (4)                    |
| Respiratory tract infection           | 2 (3)             | 0                    | 0                        |

Source: Table 4.03

\* Occurring in  $\geq 3\%$  of subjects in any group.

### 9.1.3. Post-Treatment Adverse Events

The overall incidence of subjects reporting AEs occurring post-treatment was low and comparable across all three groups. The number of subjects reporting an AE post-treatment was 4 (5%) in the placebo group 7 (5%) in the FSC 250/50 group and 4 (3%) in the SAL 50 group (Table 4.04). No individual AE occurred in  $\geq 3\%$  of subjects in any group post-treatment.

### 9.1.4. Drug-related Adverse Events on Treatment

The overall incidence of subjects reporting drug-related AEs during treatment was low and comparable between the treatment groups and placebo; 4 subjects (3%) in the FSC 250/50 group and 9 subjects (6%) in the SAL 50 group and 3 subjects (4%) in the placebo group reported any AE considered drug-related. The highest numbers of subjects reporting drug-related AEs were in the respiratory, thoracic and mediastinal disorders SOC, followed by the gastrointestinal disorders SOC.

In the placebo group, the drug-related event reported by the highest proportion of subjects was COPD (2 subjects, 3%); in the FSC 250/50 group the most common event was candidiasis (2 subjects, 1%); in the SAL 50 group the most common event was dyspnoea (4 subjects, 3%).

## 9.2. Serious and Other Significant Adverse Events

### 9.2.1. SAEs prior to treatment

Two SAEs occurred for subjects who did not receive randomized treatment; one incidence of pneumonia and one incidence of COPD exacerbation (Table 4.05). No pre-treatment SAEs were reported (Table 4.06).

## 9.2.2. SAEs during treatment

A total of 12 subjects experienced SAEs while on treatment, 4 (5%) in the Placebo group, 3 (2%) in the FSC 250/50 group and 5 (3%) in the SAL 50 group (Table 4.07).

The SAE reported by the highest proportion of subjects was listed as COPD, being reported for 4 (5%) of placebo subjects, no subjects on FSC 250/50 and 2 (1%) of SAL 50 subjects. No other individual on-treatment SAE was reported for more than 1 subject.

### 9.2.2.1. Drug-related SAEs on Treatment

A total of 3 subjects experienced on-treatment SAEs that were considered to be drug-related; one subject in the SAL 50 group, no subjects in the FSC 250/50 group and 2 subjects in the placebo group. Case narratives for these subjects are located in Section 12 (Listing 4.07).

## 9.2.3. SAEs after treatment

No post-treatment SAEs were reported (Table 4.08).

## 9.2.4. Deaths

One fatal AE of respiratory failure occurred for a subject on treatment with FSC 250/50 during the study (Listing 4.05). The AE was not attributed to FSC 250/50. The narrative for this subject is located in Section 12.

## 9.2.5. Other Significant Adverse Events

### 9.2.5.1. Adverse Events Leading to Permanent Discontinuation of Study Drug or Withdrawal

The incidence of AEs leading to withdrawal or permanent discontinuation of study drug was low and similar between the treatment groups and placebo; 3 subjects (4%) on placebo, 7 subjects (5%) on FSC 250/50 and 3 subjects (2%) on SAL 50 (Table 4.10).

The most common AEs that led to withdrawal or discontinuation were AEs in the respiratory, thoracic and mediastinal disorders SOC. With the exception of two reports of COPD in the placebo group and two reports of dyspnea in the SAL group, no single AE in any of the SOCs was reported for more than one subject in any group.

Case narratives for the subjects who were withdrawn or discontinued from study drug are provided in Section 12.2.

### 9.2.5.2. COPD Exacerbations

An exacerbation was defined as an acute worsening of symptoms of COPD requiring the use of any treatment beyond study medication or rescue salbutamol/albuterol. This included the use of systemic corticosteroids, antibiotics, and/or emergency treatment or hospitalization.

The majority of subjects ( $\geq 90\%$  in each treatment group) in the mITT population did not experience a COPD exacerbation on-treatment, and for those who did experience an exacerbation, the majority ( $\geq 75\%$  of subjects on FSC 250/50 or SAL 50) reported exacerbations of moderate severity.

No subjects in the FSC 250/50 group were hospitalized for their exacerbations, the majority of exacerbations resolved and no exacerbations were fatal (Table 11).

**Table 11 Summary of On-Treatment COPD Exacerbations**

|                                           |                 | Placebo<br>(N=75) | SAL<br>50mcg<br>(N=151) | FSC<br>250/50mcg(N=139) | Total<br>(N=<br>365) |
|-------------------------------------------|-----------------|-------------------|-------------------------|-------------------------|----------------------|
| Number of COPD exacerbations              | n               | 75                | 151                     | 139                     | 365                  |
|                                           | 0               | 69 (92)           | 136 (90)                | 135 (97)                | 340 (93)             |
|                                           | 1               | 5 (7)             | 15 (10)                 | 4 (3)                   | 24 (7)               |
|                                           | >1              | 1 (1)             | 0                       | 0                       | 1 (<1)               |
| Withdrawn due to any exacerbation         |                 | 1 (17)            | 0                       | 1 (25)                  | 2 (8)                |
| Took corticosteroids for any exacerbation |                 | 6 (100)           | 13 (87)                 | 2 (50)                  | 21 (84)              |
| Took antibiotics for any exacerbation     |                 | 6 (100)           | 11 (73)                 | 3 (75)                  | 20 (80)              |
| Hospitalized due to any exacerbation      |                 | 4 (67)            | 4 (27)                  | 0                       | 8 (32)               |
| Worst severity of exacerbation            | n               | 6                 | 15                      | 4                       | 25                   |
|                                           | Moderate        | 2 (33)            | 12 (80)                 | 3 (75)                  | 17 (68)              |
|                                           | Severe          | 4 (67)            | 2 (13)                  | 1 (25)                  | 7 (28)               |
|                                           | Moderate/Severe | 0                 | 1 (7)                   | 0                       | 1 (4)                |
| Worst outcome of exacerbation             | n               | 6                 | 15                      | 4                       | 25                   |
|                                           | Resolved        | 6 (100)           | 12 (80)                 | 3 (75)                  | 21 (84)              |
|                                           | Fatal           | 0                 | 0                       | 0                       | 0                    |
|                                           | Not resolved    | 0                 | 3(20)                   | 1 (25)                  | 4 (16)               |

Source: Table 4.13

### 9.3. Electrocardiograms

12-Lead ECGs were performed at screening. No abnormal, clinically significant ECGs were reported. Forty-four percent of subjects in the ASE population had normal ECGs and 56% had abnormal, but not clinically significant ECGs at screening (Table 4.12). No ECG findings were reported as an AE.

#### 9.4. Vital Signs

Mean screening and Visit 3/PD post-dose values for blood pressure and heart rate were similar in the treatment groups and placebo with only minor changes occurring from Screening to the Visit 3/PD post-dose measurements. No clinically meaningful differences were noted in either the FSC 250/50 or SAL 50 groups versus placebo for heart rate or blood pressure. AEs related to vital signs that were reported are summarized below.

One incidence of elevated blood pressure of moderate intensity with duration of 10 days was reported for subject 1746 (randomized to placebo). The AE resolved and was considered to be related to treatment and no action was taken with respect to the randomized treatment.

Two incidences of elevated blood pressure of mild intensity with durations of 6 days and 7 days were reported for subject 406 (randomized to FSC 250/50). The AE resolved and was not considered to be related to treatment and no action was taken with respect to the randomized treatment.

One incidence of hypertension/worsening hypertension with duration of 17 days was reported for subject 1403 (randomized to FSC 250/50). The AE resolved and was not considered to be related to treatment and no action was taken with respect to the randomized treatment.

One incidence of increased heart rate with duration of 10 days was reported for subject 1504 (randomized to SAL 50). The AE was not considered to be related to treatment by the investigator. The AE resolved and no action was taken with respect to the randomized treatment.

#### 9.5. Pregnancies

No pregnancies were reported during the study.

## 10. DISCUSSION AND CONCLUSIONS

### 10.1. Discussion

The intent of the psychometric analyses conducted using data from this study was confirmatory, with the exception of the assessment of responsiveness and the establishment of a responder threshold and MID.

This study confirmed the reliability of the SOBDA total scores with an internal consistency (assessed by Cronbach's alpha) of 0.89. There are no tests of statistical significance for alpha; the values are presented descriptively on a scale from 0–1.0, with higher scores indicating a more reliable (precise) instrument. A Cronbach's alpha of 0.70 or greater indicates acceptable internal consistency for an instrument (Nunnally, 1994).

The SOBDA was also found to have good test-retest reliability (Pearson's correlation coefficient and ICC both 0.94; effect size for difference between weekly scores=0.01) in subjects reporting no change in their breathlessness (measured by the PGAC). Mean differences between the observations were expected not to exceed an effect size (ES) <0.20. Both the Pearson's correlation and the ICC should be high, exceeding 0.60 (Hays, 1998).

A correlation of greater than 0.3 (moderate to high effect size) between SOBDA and selected patient-reported and clinical assessments of dyspnea severity or constructs hypothetically related to dyspnea severity was anticipated (Cohen, 1988). As expected, the SOBDA scores showed appropriate construct validity through Pearson correlation with the CRQ-SAS dyspnea domain score. The CRQ-SAS dyspnea scale measures the concept most similar to that measured by the SOBDA, and is supportive of the SOBDA's construct validity, showing a high correlation between the SOBDA and the CRQ-SAS dyspnea scale. CGI-C and mMRC correlations were lower than expected, which may be due to the narrow range of responses given by the clinicians (Figure 2.02 and Figure 2.04 show that most subjects were rated as '2' or '3' by the clinician on both scales). The narrow range of the clinicians' mMRC ratings was the result of the inclusion criterion that required all subjects to have an mMRC  $\geq 2$  at the screening visit. SOBDA scores in the study population demonstrated good known group validity through a series of analyses. The scores differentiated among subjects based on clinician and patient-rated dyspnea severity. As expected, discrimination based on patients' rating of their dyspnea severity was better than that based on the clinicians' rating. Known group validity was also confirmed when comparing the SOBDA to the CGI-S. Changes in last treatment week SOBDA scores were significant between responders defined using the CGI-C and CRQ-SAS dyspnea domain, but not the mMRC. This again may be due to variation in the interpretation of the severity of the mMRC response options.

Responsiveness analyses were conducted independent of treatment allocation. Good separation in SOBDA scores was seen between the PGAC groups at Day 8 among all treatment groups combined. Less separation was observed between PGAC groups throughout the later weeks of the 6 week study period compared to Week 1. This is not an unexpected trend to observe since any improvement in shortness of breath would be

1  
2  
3 expected to occur or be perceptible to patients soon after initiating therapy but with  
4 continued improvement being less noticeable over time by the patient. The particularly  
5 diminished responsiveness observed at Day 43 was possibly due to the full sample not  
6 being administered the PGAC at Day 43. Therefore, these data were not comparable to  
7 the other weeks when evaluating responsiveness.  
8

9  
10 Following the analyses described above, a post-hoc analysis was conducted to estimate a  
11 responder threshold using a distribution-based approach, including the half-standard  
12 deviation and standard error of measurement (SEM) methods. The half-standard  
13 deviation as MID was suggested by Norman et. al. because they found “remarkable  
14 universality” of half-standard deviation among statistical estimates of clinical  
15 significance for measures of HRQL [Norman, 2003]. However, Revicki and associates  
16 [Revicki, 2006], while acknowledging that the half-standard deviation was certainly  
17 clinically significant and important, noted that it was too large to be considered as  
18 minimally important. They suggested that an MID in the range of 0.2 to 0.3 standard  
19 deviation was more suitable as the smallest non-ignorable change. Using this approach,  
20 the MID was estimated as 0.2 and 0.3 times the standard deviation of the Run-in Week 1  
21 SOBDA scores. The SEM approach was suggested by Wyrwich, et al. given that  
22 theoretically, the SEM has the property of being sample-independent [Wyrwich, 1999].  
23 The SEM takes into account random measurement error in the observed change and is  
24 calculated by multiplying the standard deviation of the Run-in Week 1 score by the  
25 square root of one minus the reliability coefficient (estimated by the ICC). For SOBDA,  
26 the 0.2 and 0.3 standard deviation identified thresholds of -0.14 and -0.21, respectively.  
27 The SEM method identified a threshold of -0.17.  
28  
29  
30  
31

32 A summit meeting was held on June 18, 2010 including key opinion leaders and  
33 statistical and medical experts from UBC and GSK to review the analyses and to  
34 determine potential responder thresholds based on the anchor-based methods described  
35 above and on distribution-based methods. Clinical experts, [REDACTED],  
36 Professor of Medicine at the University of Texas Health Science Center, San Antonio  
37 Texas and [REDACTED], Professor of Medicine at the University of North  
38 Carolina, School of Medicine, Chapel Hill North Carolina, participated in this summit  
39 meeting to provide a clinical perspective on the assessment of the measurement  
40 properties and define the threshold for response of the SOBDA. Additionally, [REDACTED]  
41 [REDACTED] GSK pulmonologist and Clinical Associate Professor of Medicine,  
42 Division of Pulmonary & Critical Care Medicine at University of North Carolina, Chapel  
43 Hill) has been a member of the development team at all stages. Both the anchor-based  
44 and distribution-based methods supported a threshold range of -0.1 to -0.2 (where  
45 SOBDA weekly scores range from 1-4). When using the anchor-based method, the  
46 evaluation of data around the responder threshold was based on the change from baseline  
47 in the SOBDA score for those subjects who endorsed or had the clinician endorse for  
48 them (depending on the anchor) the response category “better” for the global assessments  
49 or the pre-specified grouping of meaningful improvement on the other measures (PGAC,  
50 CRQ-SAS, FEV<sub>1</sub>). Since dyspnea is a symptom experienced by the patient, and observed  
51 by the clinician, it was agreed that patient-reported anchors are more important to  
52 consider than those reported by their physician. The change in PGAC for subjects who  
53 endorsed ‘better’ was consistent week to week (-0.08 to -0.10 for Weeks 2-5, Week 6  
54 excluded from consideration given the data was only from half of the sample) following  
55  
56  
57  
58  
59  
60



1  
2  
3  
4  
5  
6  
7  
8  
9  
10  
11  
12  
13  
14  
15  
16  
17  
18  
19  
20  
21  
22  
23  
24  
25  
26  
27  
28  
29  
30  
31  
32  
33  
34  
35  
36  
37  
38  
39  
40  
41  
42  
43  
44  
45  
46  
47  
48  
49  
50  
51  
52  
53  
54  
55  
56  
57  
58  
59  
60

the expected initial higher response in SOBDA scores during Week 1 (-0.26). The data from Weeks 2-5 were given greater consideration as it was deemed possible that the minimum value recorded for 'better' would not have been seen at the Week 1 assessment.

The distribution-based MID of half standard deviation and SEM methods were preliminarily reviewed at the summit meeting. The analysis was later refined upon further consideration referencing work by Revicki [Revicki, 2006] of using 0.2 and 0.3 standard deviation. The 0.2 and 0.3 standard deviation identified thresholds of -0.14 and -0.21, respectively, and the SEM method identified a threshold of -0.17. The suggested threshold range of -0.1 to -0.2 was also supported by the cumulative distribution plots (Figure 2.10- Figure 2.14). This range is consistent with that of the CRQ-SAS (MID of 0.5 on a 7-point Likert scale) (Schunemann, 2005).

## 10.2. Conclusions

The SOBDA was developed according to the FDA Guidance for Industry on Patient-Reported Outcome Measures for Use in Medical Product Development to Support Labeling Claims (FDA 2009).

Reliability and validity of the SOBDA were again demonstrated to be acceptable. The baseline SOBDA scores were found to be strongly correlated with the CRQ-SAS dyspnea domain, which measures similar concepts. The SOBDA also discriminated between subjects based on severity levels (clinician rated severity of dyspnea at Visit 1).

The analyses from this study also provide evidence that the instrument is responsive to change based on responders on the CGI-C and CRQ-SAS dyspnea domain.

At this stage of instrument development, a threshold range is the most appropriate recommendation for establishing a definition for treatment responders. Based on anchor-based and distribution-based methods, the range of the responder threshold is proposed as -0.1 to -0.2; a specific value will be identified as more data is generated in future clinical trials.

The population enrolled in this study was consistent with previous clinical trials conducted evaluating bronchodilator products in subjects with COPD. Specifically, subjects were predominantly white (90%) and male (57%); the mean age was 61.1 years and the mean body mass index was 28.3 kg/m<sup>2</sup>. The majority (70%) of the study subjects were current smokers at study entry with an extensive smoking history (mean smoking history of 54.9 pack-years). The mean post-albuterol percent predicted FEV1 was 49.9%, indicative of a population with moderately severe airflow obstruction.

Overall, FSC 250/50 was well-tolerated in this study and the overall incidence of on-treatment AEs was low (27%) and comparable with SAL (23%) and placebo (19%). The only events which occurred in ≥3% of subjects in either of the treatment groups or placebo were COPD, respiratory tract infection, dyspnea and headache.

1  
2  
3 Twelve subjects experienced SAEs during the treatment period, three of which were  
4 considered possibly related to study medication. A total of 3 subjects experienced on-  
5 treatment SAEs that were considered to be drug-related; one subject in the SAL 50 group,  
6 no subjects in the FSC 250/50 group and 2 subjects in the placebo group. One fatal event  
7 of respiratory failure occurred for a subject on treatment with FSC 250/50 during the  
8 study. The SAE was not attributed to FSC 250/50.  
9

10  
11 A total of 13 subjects experienced adverse events that led to withdrawal and the  
12 percentages of the AEs were similar between the treatment groups and placebo. (4% of  
13 placebo subjects, 5% of FSC 250/50 subjects and 2% of SAL 50 subjects). No safety  
14 concerns were raised by the results of ECG or vital signs measurements and no treatment-  
15 related changes were apparent.  
16  
17  
18  
19  
20  
21  
22  
23  
24  
25  
26  
27  
28  
29  
30  
31  
32  
33  
34  
35  
36  
37  
38  
39  
40  
41  
42  
43  
44  
45  
46  
47  
48  
49  
50  
51  
52  
53  
54  
55  
56  
57  
58  
59  
60

## 11. REFERENCES

American Thoracic Society (ATS). Dyspnea. Mechanisms, assessment, and management: a consensus statement. *Am J Respir Crit Care Med* 1999; 159(1): 321-340.

Celli BR, MacNee W, ATS/ERS Task Force. Standards for the diagnosis and treatment of patients with COPD: a summary of the ATS/ERS position paper. *Eur Respir J*. 2004; 23: 932-946.

Centers for Disease Control and Prevention (CDC). Facts About Chronic Obstructive Pulmonary Disease (COPD). National Center for Environmental Health. 2-16-2006.

Cohen J. Statistical power analysis for the behavioral sciences. 2<sup>nd</sup> ed. Hillsdale, NJ: Lawrence Earlbaum Associates, 1988.

FDA. Guidance for Industry: Patient-Reported Outcome Measures: Use in Medical Product Development to Support Labeling Claims; December 2009.

Hankinson JL, Odencrantz JR, Fedan KB. Spirometric Reference Values from a Sample of the General US Population. *Am J Respir Crit Care Med* 1999; 159:179-187.

Hays R, Anderson R, Revicki DA. Assessing reliability and validity of measurement in clinical trials. In: Staquet MJ, Hays RD, Fayers PM (eds.). *Quality of Life Assessment in Clinical Trials*. New York: Oxford University Press, 1998.

Kazis LE, Anderson JJ, Meenan RF. Effect sizes for interpreting changes in health status. *Med Care* 1989;27(suppl 3):S178-A189.

Kellee Howard, et al. Development of the Shortness of Breath with Daily Activities Questionnaire (SOBDA). *Value in Health*. (Submitted for review September 2011).

MacNee W, Calverley PM. Chronic obstructive pulmonary disease . 7: Management of COPD. *Thorax* 58(3):261-5, 2003.

Mannino DM, Homa DM, Akinbami LJ, Ford ES. Chronic Obstructive Pulmonary Disease Surveillance - United States, 1971-2000. *Morbidity and Mortality Weekly Report* 2002; 51(SS06):1-16.

Norman G, Sloan J, Wyrwich K. Interpretation of changes in health-related quality of life: the remarkable universality of half a standard deviation. *Med Care*. 2003;41:582-592.

Nunnally JC, Bernstein IH. *The assessment reliability. Psychometric theory*. McGraw-Hill, Inc., 1994.

O'Leary CJ, Jones PW. The influence of decisions made by developers on health status questionnaire content. *Qual Life Res*. 1998;7:545-550.

1  
2  
3 Petty T.L. Definition, epidemiology, course, and prognosis of COPD. Clin Cornerstone  
4 2003; 5:1-10.

5  
6 Rennard S, Decramer M, Calverley PM et al. Impact of COPD in North America and  
7 Europe in 2000: subjects' perspective of Confronting COPD International Survey. Eur  
8 Respir J 2002; 20(4):799-805.

9  
10  
11 Revicki, D.A., Cella, D., Hays, R.D., Sloan, J.A., Lenderking, W.R., & Aaronson, N.K.  
12 (2006). Responsiveness and minimal important differences for patient reported outcomes.  
13 Health and Quality of Life Outcomes, 4, 70.

14  
15  
16 Schunemann HJ, Puhan M, Goldstein R, Jaeschke R, and Guyatt GH. "Measurement  
17 Properties and Interpretability of the Chronic Respiratory Disease Questionnaire (CRQ)."  
18 Journal of Chronic Obstructive Pulmonary Disease. 2005;2:81-89.

19  
20 Stang P, Lydick E, Silberman C, Kempel A, Keating ET. The Prevalence of COPD.  
21 Chest 2000; 117(5 (Suppl 2)):354S-359S.

22  
23  
24 Wyrwich K, Tierney W, Wolinsky F. Further evidence supporting a SEM-based criterion  
25 for identifying meaningful intra-individual changes in health-related quality of life. J Clin  
26 Epidemiol. 1999;52(9):861-873.

## 12. CASE NARRATIVES

There may be minor discrepancies in the details of the SAEs included in the clinical narratives compared with the safety tabulations. This is because the data comes from two different databases (i.e., locked clinical trials database and dynamic SAE database) and has been collected at different points in time. However, all key data points are reconciled. It is considered that these minor discrepancies do not change the overall clinical significance or understanding of the SAE.

### 12.1. Serious Adverse Events

|                      |                                             |
|----------------------|---------------------------------------------|
| Protocol Id:         | ASQ112989                                   |
| Investigator Number: | 074894                                      |
| Subject Number:      | 000018                                      |
| Treatment Number:    | 1803                                        |
| Case Id:             | Z0004630A                                   |
| Suspect Drugs:       | Fluticasone propionate+salmeterol xinafoate |
| Serious Events:      | Respiratory failure                         |

This 72-year-old female subject was enrolled in a blinded study for the treatment of chronic obstructive pulmonary disease. The subject received inhaled investigational product twice per day from 07 May 2010.

The subject was a former smoker (57 pack-year smoking history) and had a diagnosis of COPD (emphysema) between 10-15 years. Current medical conditions identified for the subject at screening by body system were: musculoskeletal and connective tissue disorders and nervous system disorders. Concomitant medications identified during the study were calcium, aspirin, vitamin E, vitamin D, multi-vitamin, alendronate, ropinirole, trazodone, ipratropium bromide and salbutamol sulphate.

On 11 June 2010, 35 days after the start of investigational product, the subject developed severe respiratory failure. The event was life-threatening. The subject also experienced worsening of shortness of breath. The subject was treated with salbutamol sulphate. The last dose of investigational product was on 10 June 2010. The investigator confirmed that respiratory failure was the primary SAE, with cardiorespiratory arrest as the outcome. The subject died on 11 June 2010 due to respiratory failure. An autopsy was not performed. The investigator considered that there was no reasonable possibility that the respiratory failure may have been caused by investigational product.

#### Diagnostic Assessments:

Blood pH 7.22 (7.35-7.45); pCO<sub>2</sub> 93mmHg (35.0-45.0); pO<sub>2</sub> 103mmHg (75.0-100.0); bicarbonate 37mmol/L (22.0-26.0); base excess 8.1mmol/L (0-3) This herein included information is resultant from the event Respiratory Failure, and moreover at least adjunct instigant of the event Cardio respiratory arrest.

## Investigator Text:

Patient experienced worsening SOB, was transported to ED by EMS, en-route treatment provided mild relief. ED notes indicate rapid worsening, nothing providing relief. The hospital site of demise informs that no autopsy was performed. No action on IP administration took place. Subject administered all IP doses as prescribed. -

|                      |                                                                                                |
|----------------------|------------------------------------------------------------------------------------------------|
| Protocol Id:         | ASQ112989                                                                                      |
| Investigator Number: | 068039                                                                                         |
| Subject Number:      | 000372                                                                                         |
| Treatment Number:    | 1297                                                                                           |
| Case Id:             | Z0004593A                                                                                      |
| Suspect Drugs:       | Cocaine, Cocaine, Fluticasone propionate+salmeterol xinafoate, Lortab, Oxycodone hydrochloride |
| Serious Events:      | Suicide attempt                                                                                |

This 51-year-old male subject was enrolled in a blinded study for the treatment of chronic obstructive pulmonary disease. The subject received inhaled investigational product twice per day from an unspecified date.

The subject was a current smoker (41 pack-year smoking history) and had a diagnosis of COPD (chronic bronchitis and emphysema) between 1-5 years. Current medical conditions identified for the subject at screening by body system were: musculoskeletal and connective tissue disorders. Medical conditions at the time of the event included depression. Concomitant medications included aprazolam, buprenorphine hydrochloride, oxygen, cocaine, oxycodone hydrochloride, "crack" and Lortab. The subject had family history of mental illness and suicide attempt in parental grandmother. Her daughter has history of substance abuse.

On 04 June 2010, 32 days after the start of investigational product, the subject developed grade 3 or severe attempted suicide, plan to shoot himself. The event was life-threatening. Treatment with investigational product was discontinued on 15 June 2010. The subject reported to psychiatrist current use of crack, cocaine, lortab and oxycontin for the past two months. Subject received treatment at Behavioral Health Center. No diagnostic tests performed. The event resolved on 14 June 2010. The investigator considered that there was no reasonable possibility that the attempted suicide may have been caused by investigational product and that the event was possibly due to the concomitant medication, cocaine, oxycodone hydrochloride, "crack" and Lortab.

## Investigator Text:

On 04 JUN 2010 subject attempted suicide with a plan to shoot himself. Subject reported to psychiatrist current use of crack, cocaine, lortab, and oxycontin for the past two months. Last use was on 03 JUN 2010. Subject was treated at center for 10 days. Subject was discharged home. Subject has a family history of mental illness and suicide attempt in parental grandmother. Daughter has history of substance abuse. -

|                      |                                       |
|----------------------|---------------------------------------|
| Protocol Id:         | ASQ112989                             |
| Investigator Number: | 068042                                |
| Subject Number:      | 000452                                |
| Treatment Number:    | RUN-IN                                |
| Case Id:             | Z0002212A                             |
| Suspect Drugs:       | No therapy                            |
| Serious Events:      | Chronic obstructive pulmonary disease |

This 47-year-old male subject was enrolled in a double-blind, parallel-group for the treatment of chronic obstructive pulmonary disease. The subject received no therapy.

Medical conditions at the time of the event included chronic obstructive pulmonary disease.

On 04 November 2009, the subject developed severe exacerbation of chronic obstructive pulmonary disease. The subject was hospitalised overnight. The subject also experienced blood in sputum. The investigator reported "Hemoptysis consistent with acute exacerbation of COPD". Relevant assessments included pulse oximetry on 06 November 2009, 18:12 - 90%, 18:21 - 91%, 18:28 - 92%, 19:29 - 98%, 22:27, 95%. The subject was treated with prednisone, oxygen and Symbicort and the subject was withdrawn from the study. The event resolved on 07 November 2009. The investigator considered that there was no reasonable possibility that the exacerbation of chronic obstructive pulmonary disease may have been caused by study participation.

Investigators text:

Subject presented to the Emergency Room complaining of blood in sputum. Subject admitted to hospital for observation over-night. Subject given oxygen therapy and prednisone. Hemoptysis consistent with acute exacerbation of COPD. -

|                      |                                                                                            |
|----------------------|--------------------------------------------------------------------------------------------|
| Protocol Id:         | ASQ112989                                                                                  |
| Investigator Number: | 068048                                                                                     |
| Subject Number:      | 000704                                                                                     |
| Treatment Number:    | 1053                                                                                       |
| Case Id:             | Z0002607A                                                                                  |
| Suspect Drugs:       | Salmeterol xinafoate                                                                       |
| Serious Events:      | Dehydration, Diabetes mellitus inadequate control, Impaired gastric emptying, Pneumothorax |

This 71-year-old female subject was enrolled in a blinded study for the treatment of chronic obstructive pulmonary disease. The subject received inhaled investigational product twice per day from 09 December 2009.

Medical conditions at the time of the event included diabetes and diabetic gastroparesis.

On 11 December 2009, two days after the start of investigational product, the subject developed grade 3 or severe dehydration, grade 3 or severe uncontrolled diabetes and grade 3 or severe increased gastroparesis. She had been vomiting intermittently since 26 November 2009 due to the medical condition of diabetic gastroparesis. On 13 December 2009, 4 days after the start of investigational product the subject developed grade 3 or severe pneumothorax. The subject was hospitalised. Treatment with investigational product was interrupted. Laboratory, chest X-ray, MRI and ECG results were pending. The subject was treated with metoclopramide hydrochloride and insulin. The events resolved on 16 December 2009. The investigator considered that there was no reasonable possibility that the dehydration, pneumothorax, uncontrolled diabetes and increased gastroparesis may have been caused by investigational product.

Investigator text:

Patient was hospitalized on 11 Dec 2009 after a visit to her endocrinologist. She had been vomiting intermittently since 26 Nov 2009 due to her diabetic gastroparesis. She was diagnosed with dehydration. On 13 Dec 2009, she had a \*pneumothorax of her left lung while she was still hospitalized. Her doctor intends for her to remain hospitalized until 16 Dec 2009. (This is all per patient report when she called our office today, 14 Dec 2009.) Medical Records will be requested to be sent to CTHR after her discharge. Per patient report, her doctor said: pneumothorax was caused by the recurrent vomiting (will look at medical records to verify if this was the case)

|                      |                                       |
|----------------------|---------------------------------------|
| Protocol Id:         | ASQ112989                             |
| Investigator Number: | 068087                                |
| Subject Number:      | 000909                                |
| Treatment Number:    | 1036                                  |
| Case Id:             | Z0003665A                             |
| Suspect Drugs:       | Placebo                               |
| Serious Events:      | Chronic obstructive pulmonary disease |

This 55-year-old female subject was enrolled in a blinded study for the treatment of chronic obstructive pulmonary disease. The subject received inhaled investigational product twice per day from 12 January 2010.

Medical conditions at the time of the event included current smoker. Concomitant medications included docusate sodium, dalteparin sodium, nicotine and lorazepam.

On 18 January 2010, six days after the start of investigational product, the subject developed severe exacerbation of chronic obstructive pulmonary disease. The subject visited ER with cough, shortness of breath and wheeze. The subject was hospitalised. Physical Examination revealed T 98.1, HR 89, RR 19 and 24, O2 saturation 96%, BP 123/70. Chest x-ray negative at time of admission. The subject was treated with moxifloxacin hydrochloride, methylprednisolone sodium succinate, Duoneb and Tussionex syrup. Treatment with investigational product was continued. The event



resolved on 21 January 2010. The investigator considered that there was no reasonable possibility that the exacerbation of chronic obstructive pulmonary disease may have been caused by investigational product.

Relevant Diagnostics:

Chest x-ray negative at time of admission. No other lab results received when notes requested

Investigator text:

Pt presented to the ER with c/o cough, SOB and wheeze. PE revealed T 98.1, HR 89, RR 19 & 24, O2sat 96%, BP 123/70. She was admitted and received Inhaled BD, ICS, IV antibiotics IV steroids. Physician orders have been requested for meds, doses and dates administered Pt did not reveal to study staff during the study or at visit 3 that she had been sick. Review of written diary showed no hospitalization. Review of PHT medical contact report indicates NO for all dates Jan 18-23. Site received information along with the request for a routine chest x-ray upon entry into another trial 23 Mar 2010. -

|                      |                                             |
|----------------------|---------------------------------------------|
| Protocol Id:         | ASQ112989                                   |
| Investigator Number: | 068060                                      |
| Subject Number:      | 001151                                      |
| Treatment Number:    | 1674                                        |
| Case Id:             | Z0003944A                                   |
| Suspect Drugs:       | Fluticasone propionate+salmeterol xinafoate |
| Serious Events:      | Myocardial infarction                       |

This 54-year-old male subject was enrolled in a blinded study for the treatment of chronic obstructive pulmonary disease. The subject received inhaled investigational product twice per day from 12 March 2010.

The subject was randomised to Fluticasone propionate (CCI18781)/salmeterol xinafoate (GR33343G) combination product 250/50mcg per inhalation via DISKUS.

Medical conditions at the time of the event included coronary artery disease.

On 11 April 2010, 30 days after the start of investigational product, the subject developed grade 3 or severe myocardial infarction. The subject was hospitalised for non-ST elevation myocardial infarction. The subject woke with chest pain and shortness of breath. The subject was treated with metoprolol tartrate, nitroglycerine, heparin sodium and clopidogrel bisulphate. Relevant laboratory values on 12 April 2010 - haemoglobin 12.6, white blood cell count 9.9, Troponin 0.11, Troponin I 0.14, potassium 3.8, magnesium 1.5, fasting blood glucose 119 and creatinine phosphokinase MB 6.9, blood myoglobin 119 (units and normal ranges unavailable). The subject had post left heart catheterization with a stent to the left subclavian. Treatment with investigational product was continued. The event resolved on 18 April 2010. The investigator considered that there was no reasonable possibility that the myocardial infarction may have been caused by investigational product.

Investigator text:

Subject was awoken with chest pain and shortness of breath. Subject has a significant coronary artery disease; history and chest pain, which is typical; EKG changes; enzymes, which are positive. Subject was admitted for non-ST elevation myocardial infarction, status post left heart catheterization with a stent to the left subclavian.

Follow up received on 15 June 2010 on answered query:

The subject did not have any relevant concurrent medications - none of them were the cause of the SAE.

|                      |                                       |
|----------------------|---------------------------------------|
| Protocol Id:         | ASQ112989                             |
| Investigator Number: | 068062                                |
| Subject Number:      | 001206                                |
| Treatment Number:    | 1186                                  |
| Case Id:             | Z0003239A                             |
| Suspect Drugs:       | Placebo                               |
| Serious Events:      | Chronic obstructive pulmonary disease |

This 76-year-old female subject was enrolled in a blinded study for the treatment of chronic obstructive pulmonary disease. The subject received inhaled investigational product twice per day from 27 January 2010.

The subject was a former smoker (70 pack-year smoking history) and had a diagnosis of COPD (chronic bronchitis and emphysema) between 1-5 years. Current medical conditions identified for the subject at screening by body system were: cardiac disorders, gastrointestinal disorders, and respiratory, thoracic, and mediastinal disorders. Concomitant medications identified during the study were aspirin, omeprazole, amlodipine, and olmesartan and Advair

On 12 February 2010, 16 days after the start of investigational product, the subject developed grade 3 or severe exacerbation of chronic obstructive pulmonary disease. The subject was hospitalised. The subject also experienced acute shortness of breath, intermittent wheezing. Chest X-ray results were normal. On 14 February 2010 tests showed white blood cell count was 8.1 k/uL (4.8 - 10.8), pCO<sub>2</sub> was 41.0 mmHg (35 - 48) and pO<sub>2</sub> was 68.0 mmHg (83 - 108). The subject was treated with salbutamol sulphate, levofloxacin, prednisone, methylprednisolone sodium succinate and oxygen. Treatment with investigational product was discontinued on 14 February 2010 and the subject was withdrawn from the study. The event resolved on 22 February 2010. The investigator considered that there was a reasonable possibility that the exacerbation of chronic obstructive pulmonary disease may have been caused by investigational product and that the event was possibly due to study participation.

Investigator text:

COPD exacerbation (cold weather induced), possible lack of efficacy. Patient had acute shortness of breath, intermittent wheezing.

|                      |            |
|----------------------|------------|
| Protocol Id:         | ASQ112989  |
| Investigator Number: | 068065     |
| Subject Number:      | 001302     |
| Treatment Number:    | RUN-IN     |
| Case Id:             | Z0002977A  |
| Suspect Drugs:       | No therapy |
| Serious Events:      | Pneumonia  |

This 48-year-old female subject was enrolled in a blinded study for the treatment of chronic obstructive pulmonary disease. The subject was in the run-in phase and received no therapy.

Concomitant medications included Duoneb.

The subject was called on 21 January 2010 and she stated that she had been treated by her primary care physician for fever and congestion with antibiotics. She was considered run-in failure at that time.

The subject had no relevant medical history or risk factors. On 22 January 2010, the subject developed grade 3 or severe pneumonia. The subject was hospitalised. A chest x-ray on 22 January 2010 showed persistent right basilar infiltrates. The subject was treated with methylprednisolone sodium succinate, ceftriaxone, levofloxacin and guaiphenesin. The event resolved on 26 January 2010. The investigator considered that there was no reasonable possibility that the pneumonia may have been caused by no therapy.

Investigator Text:

The subject was called on 21 Jan 2010 and she stated that she had been treated by her primary care physician for fever and congestion with antibiotics. She was considered run-in failure at that time. She went to see her pulmonologist on 22 Jan 2010 and was diagnosed with Pneumonia and being admitted to the hospital for further treatment.

|                      |                                       |
|----------------------|---------------------------------------|
| Protocol Id:         | ASQ112989                             |
| Investigator Number: | 074563                                |
| Subject Number:      | 001339                                |
| Treatment Number:    | 1846                                  |
| Case Id:             | Z0004145A                             |
| Suspect Drugs:       | Salmeterol xinafoate                  |
| Serious Events:      | Chronic obstructive pulmonary disease |

This 62-year-old female subject was enrolled in a blinded study for the treatment of chronic obstructive pulmonary disease. The subject received inhaled investigational product twice per day from 14 April 2010 to 26 May 2010.

On 16 April 2010, two days after the start of investigational product, the subject developed grade 3 or severe exacerbation of chronic obstructive pulmonary disease. The subject was hospitalised. The subject experienced shortness of breath. Chest x-ray was performed- impression of moderately advanced fibrosis. Pre-existing medical condition. Oxygen saturation on 18 April 2010 was 97% (normal range 95-100). The subject was treated with levofloxacin, prednisone, paracetamol, Lortab, Advair, salbutamol sulphate, aspirin, nicotrol NS, guaiphenesin, enoxaparin, ibuprofen and ketorolac trometamol. Treatment with investigational product was continued. The event resolved on 19 April 2010. The investigator considered that there was no reasonable possibility that the exacerbation of chronic obstructive pulmonary disease may have been caused by investigational product.

Investigator text:

Subject was hospitalized 16Apr for COPD exacerbation. She was discharged 19APR. PI notes that SAE was not related to Investigatory Product. Chest x-ray was performed- impression of moderately advanced fibrosis. Fibrosis was noted in chest x-ray obtained at V1 of study. Pre-existing medical condition. Narrative Remarks: Subject came to office for ASQ112989 V2 study with complaints of SOB. She said she went camping for 3 days (April 9-12) and has been experiencing SOB since her trip. She said smoke from the bonfire and prolonged pollen exposure contributed to her symptoms. Her FEV1 was 10% than it was two weeks earlier. PI was informed by phone about subjects breathing, however, subject refused to wait for PI to evaluate her. Subject was admitted to hospital day after her study visit (16APR10) for a COPD exacerbation.

|                      |                                       |
|----------------------|---------------------------------------|
| Protocol Id:         | ASQ112989                             |
| Investigator Number: | 068072                                |
| Subject Number:      | 001458                                |
| Treatment Number:    | 1354                                  |
| Case Id:             | Z0003703A                             |
| Suspect Drugs:       | Placebo                               |
| Serious Events:      | Chronic obstructive pulmonary disease |

This 66-year-old male subject was enrolled in a blinded study for the treatment of chronic obstructive pulmonary disease. The subject received inhaled investigational product twice per day from 24 February 2010.

The subject was a former smoker (52 pack-year smoking history) and had a diagnosis of COPD (emphysema) between 1-5 years.

Medical conditions at the time of the event included chronic obstructive pulmonary disease. Concomitant medications included tiotropium and Symbicort.

On 17 March 2010, 21 days after the start of investigational product, the subject developed grade 3 or severe exacerbation of chronic obstructive pulmonary disease. The subject also experienced extreme shortness of breath that was not relieved by the administration of investigational product. The subject was hospitalised. Chest X-ray

showed COPD lung changes without pneumothorax or consolidation, ECG showed no clinically significant results. On 21 March 2010, laboratory test results showed troponin I 0.051 ng/ml (normal range 0.00 - 0.034), creatine phosphokinase MB 3.2 ng/ml (0.0 - 4.2), INR 1.1 (0.8 - 1.2) and prothrombin time 10.5 seconds (9.0 - 12.0). The subject was treated with methylprednisolone sodium succinate, salbutamol sulphate, levofloxacin, ipratropium bromide, methylprednisolone, pantoprazole, aspirin and enoxaparin. Treatment with investigational product placebo was discontinued on 21 March 2010 and the subject was withdrawn from the study. The event resolved on 05 April 2010. The investigator considered that there was a reasonable possibility that the exacerbation of chronic obstructive pulmonary disease may have been caused by investigational product.

Investigator text:

Subject states he had a COPD exacerbation starting on 3/17/2010. Subject was admitted to hospital on 3/21/2010 and was released on 3/23/2010. Subject complained of severe shortness of breath that was not relieved by IP. Subject withdrew consent on 3/23/2010.

|                      |                                      |
|----------------------|--------------------------------------|
| Protocol Id:         | ASQ112989                            |
| Investigator Number: | 068081                               |
| Subject Number:      | 001702                               |
| Treatment Number:    | 1161                                 |
| Case Id:             | Z0003345A                            |
| Suspect Drugs:       | Salmeterol xinafoate                 |
| Serious Events:      | Cerebrovascular accident, Chest pain |

This 58-year-old male subject was enrolled in a blinded study for the treatment of chronic obstructive pulmonary disease. The subject received inhaled investigational product twice per day from 09 February 2010.

The subject's past medical history included femoral artery stent. Medical conditions at the time of the event included coronary artery disease and hypertension. Concomitant medications included Avalide and nebivolol hydrochloride.

On 20 February 2010, 11 days after the start of investigational product, the subject developed grade 3 or severe cerebrovascular stroke. On 23 February 2010, the subject developed grade 1 or mild retrosternal chest pain. The subject was hospitalised. Subject also reported experiencing sudden onset of weakness & right parathesias. Labs obtained with elevated lipids noted otherwise unremarkable. ECG performed showing sinus rhythm with nonspecific ST-T changes, upper GI complete which was normal. No other intervention was recommended. The subject was treated with potassium chloride, aspirin, atorvastatin calcium, sodium chloride, clopidogrel bisulphate, midazolam, hydromorphone hydrochloride, oxygen, benzocaine and lignocaine hydrochloride. Treatment with investigational product was interrupted and restarted on 24 February 2010. The event retrosternal chest pain resolved on 23 February 2010 and cerebrovascular stroke resolved on 24 February 2010. The investigator reported "Cannot rule out relationship to event because cerebrovascular stroke and retrosternal chest pain are possible side effects of Advair." The investigator considered that there was a reasonable possibility that the cerebrovascular stroke and retrosternal chest pain may have been caused by investigational product.

## Diagnostic Assessments:

22 February 2010 Transesophageal echocardiogram- normal left ventricular function, no mural thrombus or vegetation -- MRA of the neck - normal; 24 February 2010 Upper GI - normal; 22 February 2010 MRI of Brain showed small amount of plaque in the distal right MI segment with slight distal irregularities; chest x-ray- no acute abnormality

## Investigator text:

Subjects wife contacted office 23 feb 2010 at 17:00 and reported subject had had a stroke on Saturday 20 feb 2010 and was admitted to Hospital. We have requested medical records and will update as soon as records are received. Per medical records subject was taken to WBMC ER after experiencing sudden onset of weakness & right parathesias and subsequently transferred to Princeton Hospital for further evaluation, labs obtained with elevated lipids noted otherwise unremarkable. Subject treated with statins & antiplatelet (aspirin) & received physical therapy. During hospitalization subject evaluated by neurology. On 23 Feb 2010 he developed mild retrosternal chest pain, which was evaluated by cardiology. echocardiogram performed showing sinus rhythm with nonspecific ST-T changes, upper GI complete which was normal. No other intervention was recommended. Subject was discharged on 25 Feb 2010 in stable condition to receive home physical therapy and anti-platelet therapy. Subject restarted study medication on 02/24/2010.

Follow up received on 06 July 2010 on answered query:

The subject did not have pre-existing condition of fibrosis per Visit 1 CXR taken 31 March 2010.

|                      |                                                  |
|----------------------|--------------------------------------------------|
| Protocol Id:         | ASQ112989                                        |
| Investigator Number: | 068081                                           |
| Subject Number:      | 001704                                           |
| Treatment Number:    | 1162                                             |
| Case Id:             | Z0003244A                                        |
| Suspect Drugs:       | Salmeterol xinafoate                             |
| Serious Events:      | Chronic obstructive pulmonary disease, Pneumonia |

This 53-year-old male subject was enrolled in a blinded study for the treatment of chronic obstructive pulmonary disease. The subject received inhaled investigational product twice per day from 09 February 2010.

The subject's past medical history included myocardial infarction. Medical conditions at the time of the event included herpes simplex ophthalmic. Concomitant medications included acyclovir, ipratropium bromide, aspirin and levosalbutamol.

On 16 February 2010, seven days after the start of investigational product, the subject developed grade 3 or severe pneumonia and grade 3 or severe exacerbation of chronic obstructive pulmonary disease. The subject was hospitalised. Treatment with investigational product was interrupted. Labs revealed wbc elevated - white blood count

on 17 February 2010 was 23.1ul (normal range 5-10), otherwise unremarkable. Blood and sputum cultures revealed no growth. Chest X-ray 17 February 2010 revealed pneumonia. The subject was treated with methylprednisolone sodium succinate, piperacillin sodium, levofloxacin, prednisone, enoxaparin, guaiphenesin and ipratropium bromide. The events resolved on 02 March 2010. The investigator considered that there was no reasonable possibility that the pneumonia and exacerbation of chronic obstructive pulmonary disease may have been caused by investigational product.

Investigator text:

Subject notified clinic today 16 Feb 2010 at 13:00 that he was treated today 16 Feb 2010 by primary care physician and is being admitted to hospital with a diagnosis of pneumonia. No other information is available at this time. We will obtain hospital records and update as soon as possible Per medical records subject was admitted to hospital on 16 Feb 2010 with diagnosis pneumonia & chronic obstructive pulmonary disease exacerbation. Labs obtained, wbc elevated, otherwise unremarkable. Blood & sputum cultures obtained final report no growth. Subject was treated with IV antibiotics & IV solumedrol & po prednisone, aggressive bronchodilator treatments & chest vibropercussion. He responded well to treatment and was discharged home on 19 Feb 2010 in stable condition with po antibiotics & steroids .

|                      |                           |
|----------------------|---------------------------|
| Protocol Id:         | ASQ112989                 |
| Investigator Number: | 076104                    |
| Subject Number:      | 001730                    |
| Treatment Number:    | 1786                      |
| Case Id:             | B0643244B                 |
| Suspect Drugs:       | Salmeterol xinafoate      |
| Serious Events:      | Acute respiratory failure |

This 67-year-old male subject was enrolled in a blinded study for the treatment of chronic obstructive pulmonary disease. The subject received inhaled investigational product twice per day from 18 March 2010.

The subject's past medical history included 98 pack a year smoking history.

On 19 March 2010, one day after the start of investigational product, the subject developed grade 3 or severe acute respiratory failure. The subject was hospitalised. The subject had two bronchoscopies for mucus clearing purposes as well as diagnostic purposes. Subject also experienced COPD exacerbation. Treatment with investigational product was continued. The event resolved on 29 March 2010. The investigator considered that there was no reasonable possibility that the acute respiratory failure may have been caused by investigational product.

Investigator text:

Patient reason for admission changed to acute respiratory failure after records were received. Patient also treated for COPD exacerbation and several other AEs while hospitalized.

Follow up received in answered query on 25 May 2010:

The COPD exacerbation was not considered to be a SAE. The subject did not receive any treatment medications for acute respiratory failure. Bronchoscopies cleared secretions. No growth was noted.

Follow up received in answered query on 03 June 2010:

The subject did not experience any other signs and symptoms associated to the final diagnosis.

|                      |                                       |
|----------------------|---------------------------------------|
| Protocol Id:         | ASQ112989                             |
| Investigator Number: | 076104                                |
| Subject Number:      | 001746                                |
| Treatment Number:    | 1859                                  |
| Case Id:             | Z0004173A                             |
| Suspect Drugs:       | Placebo                               |
| Serious Events:      | Chronic obstructive pulmonary disease |

This 51-year-old female subject was enrolled in a blinded study for the treatment of chronic obstructive pulmonary disease. The subject received inhaled investigational product twice per day from 26 April 2010.

Medical history at the time of the event included being a current smoker.

On 06 May 2010, 10 days after the start of investigational product, the subject developed grade 3 or severe exacerbation of chronic obstructive pulmonary disease. The subject was hospitalised. The subject was treated with moxifloxacin hydrochloride, dexamethasone, methylprednisolone, Medrol and prednisone. Treatment with investigational product was continued. The event resolved on 19 May 2010. The investigator considered that there was no reasonable possibility that the exacerbation of chronic obstructive pulmonary disease may have been caused by investigational product.

Investigator text:

Patient treated with 60mg prednisone when symptoms started. Patient did not respond to outpatient therapy. Patient admitted 10 May 2010. Patient discharged on 17 May 2010 with a Medrol Dose Pack. Patient took herself off of the Medrol Dose Pack on 19 May 2010. Patient rechecked in office on 24 May 2010 and is in good condition at this time.

Follow up received in answered query on 01 June 2010: No further diagnostics was completed. The subject also experienced increased shortness of breath.



Follow-up information received 29 June 2010: The subject had no other symptoms other than the exacerbation.

## 12.2. Adverse Events Leading to Withdrawal

### Placebo

Protocol Id: ASQ112989  
Investigator Number: 068062  
Subject Number: 001206  
Treatment Number: 1186  
Case Id: Z0003239A  
Suspect Drugs: Placebo  
Serious Events: Chronic obstructive pulmonary disease

This 76-year-old female subject was enrolled in a blinded study for the treatment of chronic obstructive pulmonary disease. The subject received inhaled investigational product twice per day from 27 January 2010.

The subject was a former smoker (70 pack-year smoking history) and had a diagnosis of COPD (chronic bronchitis and emphysema) between 1-5 years. Current medical conditions identified for the subject at screening by body system were: cardiac disorders, gastrointestinal disorders, and respiratory, thoracic, and mediastinal disorders. Concomitant medications identified during the study were aspirin, omeprazole, amlodipine, and olmesartan.

On 12 February 2010, 16 days after the start of investigational product, the subject developed a protocol-defined severe exacerbation of chronic obstructive pulmonary disease. The subject was hospitalised. The subject also experienced acute shortness of breath, intermittent wheezing. Chest X-ray results were normal. On 14 February 2010 tests showed white blood cell count was 8.1 k/uL (4.8 - 10.8), pCO<sub>2</sub> was 41.0 mmHg (35 - 48) and pO<sub>2</sub> was 68.0 mmHg (83 - 108). The subject was treated with salbutamol sulphate, levofloxacin, prednisone, methylprednisolone sodium succinate and oxygen. Treatment with investigational product was discontinued on 14 February 2010 and the subject was withdrawn from the study on 22 February 2010 which is also the date the event resolved. The investigator considered that there was a reasonable possibility that the exacerbation of chronic obstructive pulmonary disease may have been caused by investigational product and that the event was possibly due to study participation.

Protocol Id: ASQ112989  
Investigator Number: 068072  
Subject Number: 001458  
Treatment Number: 1354  
Case Id: Z0003703A  
Suspect Drugs: Placebo  
Serious Events: Chronic obstructive pulmonary disease

This 66-year-old male subject was enrolled in a blinded study for the treatment of chronic obstructive pulmonary disease. The subject received inhaled investigational product twice per day from 24 February 2010.

The subject was a former smoker (52 pack-year smoking history) and had a diagnosis of COPD (emphysema) between 1-5 years. No medical conditions or concomitant medications were identified for the subject.

On 17 March 2010, 21 days after the start of investigational product, the subject developed a protocol-defined severe exacerbation of chronic obstructive pulmonary disease. The subject also experienced extreme shortness of breath that was not relieved by the administration of investigational product. The subject was hospitalised on 21 March 2010 and was released on 23 March 2010. Chest X-ray showed COPD lung changes without pneumothorax or consolidation, ECG showed no clinically significant results. On 21 March 2010, laboratory test results showed troponin I 0.051 ng/ml (normal range 0.00 - 0.034), creatine phosphokinase MB 3.2 ng/ml (0.0 - 4.2), INR 1.1 (0.8 - 1.2) and prothrombin time 10.5 seconds (9.0 - 12.0). The subject was treated with methylprednisolone sodium succinate, salbutamol sulphate, levofloxacin, ipratropium bromide, methylprednisolone, pantoprazole, aspirin and enoxaparin. Treatment with investigational product placebo was discontinued on 21 March 2010 and the subject was withdrawn from the study on 23 March 2010. The event resolved on 05 April 2010. The investigator considered that there was a reasonable possibility that the exacerbation of chronic obstructive pulmonary disease may have been caused by investigational product.

Protocol Id: ASQ112989  
Investigator Number: 194755  
Subject Number: 8  
Suspect Drugs: Placebo  
AE(s) leading to withdrawal: Respiratory tract infection

This 76-year-old Caucasian female developed a respiratory tract infection of moderate intensity on 23 March 2010, 7 days after receiving placebo treatment BID from 17 March 2010. Study treatment was discontinued on 27 March 2010 and the subject was withdrawn from the study. The event had not resolved at the time of reporting. The investigator concluded that the event was not related to study treatment.

### Salmeterol

Protocol Id: ASQ112989  
Investigator Number: 017249  
Subject Number: 1327  
Suspect Drugs: salmeterol xinafoate  
AE(s) leading to withdrawal: Dyspnea, respiratory tract congestion

This 67-year-old African American male developed respiratory tract congestion and dyspnea of moderate intensity on 27 March 2010, 3 days after receiving SAL 50 BID from 25 March 2010. Study treatment was discontinued on 27 March 2010 and the

ASQ112989

subject was withdrawn from the study. The events resolved on 29 March 2010 and the investigator concluded that there was a reasonable possibility that the events were related to study treatment.

Protocol Id: ASQ112989  
 Investigator Number: 017249  
 Subject Number: 1343  
 Suspect Drugs: salmeterol xinafoate  
 AE(s) leading to withdrawal: Dyspnea

This 62-year-old Caucasian female developed mild dyspnea on 15 May 2010, 27 days after receiving SAL 50 BID from 19 April 2010. Study treatment was discontinued on 14 May 2010 and the subject was withdrawn from the study. The event resolved on 25 May 2010 and the investigator concluded that there was a reasonable possibility that the event was related to study treatment.

Protocol Id: ASQ112989  
 Investigator Number: 155967  
 Subject Number: 772  
 Suspect Drugs: salmeterol xinafoate  
 AE(s) leading to withdrawal: Lip swelling

This 70-year-old Caucasian female developed lip swelling of severe intensity on 10 March 2010, 2 days after receiving SAL 50 BID from 09 March 2010. Study treatment was discontinued on 18 March 2010 and the subject was withdrawn from the study. The event resolved on 01 April 2010 and the investigator concluded that there was a reasonable possibility that the event was related to study treatment.

### Fluticasone Propionate/ Salmeterol Combination

Protocol Id: ASQ112989  
 Investigator Number: 074894  
 Subject Number: 000018  
 Treatment Number: 1803  
 Case Id: Z0004630A  
 Suspect Drugs: Fluticasone propionate+salmeterol xinafoate  
 Serious Events: Respiratory failure

This 72-year-old female subject was enrolled in a blinded study for the treatment of chronic obstructive pulmonary disease. The subject received inhaled investigational product twice per day from 07 May 2010.

The subject was a former smoker (57 pack-year smoking history) and had a diagnosis of COPD (emphysema) between 10-15 years. Current medical conditions identified for the subject at screening by body system were: musculoskeletal and connective tissue disorders and nervous system disorders. Concomitant medications identified during the study were calcium, aspirin, vitamin E, vitamin D, multi-vitamin, alendronate, ropinirole, and trazodone.

On 11 June 2010, 35 days after the start of investigational product, the subject developed severe respiratory failure. The event was life-threatening. The subject also experienced worsening of shortness of breath. The subject was treated with salbutamol sulphate. Subject was transported to ED by EMS, en-route treatment provided mild relief. ED notes indicate rapid worsening, nothing providing relief. The hospital site of demise informs that no autopsy was performed. Diagnostic assessments: Blood pH 7.22 (7.35-7.45); pCO<sub>2</sub> 93mmHg (35.0-45.0); pO<sub>2</sub> 103mmHg (75.0-100.0); bicarbonate 37mmol/L (22.0-26.0); base excess 8.1mmol/L (0-3), this information concerns the event Respiratory Failure, and moreover at least adjunct instigator of the event Cardio respiratory arrest. The last dose of investigational product was on 10 June 2010. No action on IP administration took place. Subject administered all IP doses as prescribed. The investigator confirmed that respiratory failure was the primary SAE, with cardiorespiratory arrest as the outcome. Subject was withdrawn from the study on 11 June 2010. The subject died on 11 June 2010 due to respiratory failure. An autopsy was not performed. The investigator considered that there was no reasonable possibility that the respiratory failure may have been caused by investigational product.

Protocol Id: ASQ112989  
Investigator Number: 068039  
Subject Number: 000372  
Treatment Number: 1297  
Case Id: Z0004593A  
Suspect Drugs: Cocaine, Cocaine, Fluticasone propionate+salmeterol xinafoate, Lortab, Oxycodone hydrochloride  
Serious Events: Suicide attempt

This 51-year-old male subject was enrolled in a blinded study for the treatment of chronic obstructive pulmonary disease. The subject received inhaled investigational product twice per day from 03 May 2010.

The subject was a current smoker (41 pack-year smoking history) and had a diagnosis of COPD (chronic bronchitis and emphysema) between 1-5 years. Current medical conditions identified for the subject at screening by body system were: musculoskeletal and connective tissue disorders. Medical conditions at the time of the event included depression. Concomitant medications identified during the study were aprazolam, buprenorphine hydrochloride, and oxygen.

On 04 June 2010, 32 days after the start of investigational product, the subject attempted suicide with a plan to shoot himself. The event was life-threatening. Subject reported to psychiatrist use of crack, cocaine, lortab, and oxycodone hydrochloride for the past two months. Last use was on 03 JUN 2010. Subject was treated at center for 10 days. Subject received treatment at Behavioral Health Center. No diagnostic tests performed. The event resolved on 14 June 2010. Subject was discharged home. Subject had a family history of mental illness and suicide attempt in parental grandmother. Daughter has history of substance abuse. Treatment with investigational product was discontinued on 15 June 2010. Subject was withdrawn from the study on 16 June 2010. The investigator considered that there was no reasonable possibility that the attempted suicide may have been caused by investigational product and that the event was possibly due to the concomitant medication, cocaine, oxycodone hydrochloride, "crack" and Lortab.

ASQ112989

1  
2  
3 Protocol Id: ASQ112989  
4 Investigator Number: 006948  
5 Subject Number: 1303  
6 Suspect Drugs: Fluticasone propionate+salmeterol xinafoate  
7 AE(s) leading to withdrawal: Acute sinusitis  
8  
9

10  
11 This 64-year-old Caucasian male developed acute sinusitis of moderate intensity on 16  
12 February 2010, 13 days after receiving FSC 250/50 BID from 04 February 2010. Study  
13 treatment was discontinued on 26 February 2010 and the subject was withdrawn from the  
14 study. The event resolved on 05 March 2010 and the investigator concluded that the  
15 event was not related to study treatment.  
16

17  
18 Protocol Id: ASQ112989  
19 Investigator Number: 009595  
20 Subject Number: 221  
21 Suspect Drugs: Fluticasone propionate+salmeterol xinafoate  
22 AE(s) leading to withdrawal: Candidiasis  
23  
24

25  
26 This 44-year-old Caucasian male developed candidiasis of moderate intensity on 05  
27 March 2010, 18 days after receiving FSC 250/50 BID from 16 February 2010. Study  
28 treatment was discontinued on 05 March 2010 and the subject was withdrawn from the  
29 study. The event resolved on 13 March 2010 and the investigator concluded that there  
30 was a reasonable possibility that the event was related to study treatment.  
31

32  
33 Protocol Id: ASQ112989  
34 Investigator Number: 017249  
35 Subject Number: 1325  
36 Suspect Drugs: Fluticasone propionate+salmeterol xinafoate  
37 AE(s) leading to withdrawal: Dyspnea, pharyngitis  
38  
39

40  
41 This 64-year-old Caucasian female developed dyspnea and pharyngitis of moderate  
42 intensity on 24 March 2010, 6 days after receiving FSC 250/50 BID from 19 March  
43 2010. Study treatment was discontinued on 24 March 2010 and the subject was  
44 withdrawn from the study. Both events resolved on 24 March 2010 and the investigator  
45 concluded that the event was not related to study treatment.  
46

47  
48 Protocol Id: ASQ112989  
49 Investigator Number: 018980  
50 Subject Number: 52  
51 Suspect Drugs: Fluticasone propionate+salmeterol xinafoate  
52 AE(s) leading to withdrawal: Irritability  
53  
54  
55  
56  
57  
58  
59  
60

1  
2  
3 This 58-year-old Caucasian female developed irritability of moderate intensity on 03  
4 December 2010, 4 days after receiving FSC 250/50 BID from 30 November 2009. Study  
5 treatment was discontinued on 31 December 2009 and the subject was withdrawn from  
6 the study. The event resolved on 04 January 2010 and the investigator concluded that  
7 there was a reasonable possibility that the event was related to study treatment.  
8

9  
10 Protocol Id: ASQ112989  
11 Investigator Number: 067189  
12 Subject Number: 105  
13 Suspect Drugs: Fluticasone propionate+salmeterol xinafoate  
14 AE(s) leading to withdrawal: Lung neoplasm  
15  
16

17  
18 This 66-year-old Caucasian male was discovered to have a lung neoplasm of severe  
19 intensity on 05 January 2010, 14 days after receiving FSC 250/50 BID from 23  
20 December 2009. Study treatment was discontinued on 07 January 2010 and the subject  
21 was withdrawn from the study. The event was considered to be resolving at the time the  
22 subject was withdrawn and the investigator concluded that the event was not related to  
23 study treatment.  
24  
25  
26  
27  
28  
29  
30  
31  
32  
33  
34  
35  
36  
37  
38  
39  
40  
41  
42  
43  
44  
45  
46  
47  
48  
49  
50  
51  
52  
53  
54  
55  
56  
57  
58  
59  
60

Protocol: ASQ112989  
 Population: All Subjects Enrolled

Page 1 of 1

Table 1.01  
 Summary of Study Populations

| Population                   | Placebo   | SAL 50mcg BID | FSC 250/50mcg BID | Total      |
|------------------------------|-----------|---------------|-------------------|------------|
| All Subjects Enrolled        |           |               |                   | 547        |
| Run-in                       |           |               |                   | 418        |
| Randomised                   | 75        | 152           | 139               | 366        |
| Modified intent-to-treat [1] | 75 (100%) | 151 (>99%)    | 139 (100%)        | 365 (>99%) |

75

For peer review only

Note: One subject was randomised to SAL 50mcg but refused to take his study medication and is therefore excluded from the MITT population.

[1] Percentages are based on the number of subjects randomised.

dln73797: /arenv/arprod/ccil8781\_gr33343/asq112989/final/drivers/pp\_t001.sas 23AUG2010 18:43

CONFIDENTIAL

ASQ112989

Protocol: ASQ112989  
Population: All Subjects Enrolled

Table 1.02  
Summary of Attendance at Each Clinic Visit

| Visit               | Screen failure (N=129) | Run-in failure (N=52) | Placebo (N=75) | SAL 50mcg BID (N=152) | FSC 250/50mcg BID (N=139) | Total (N=547) |
|---------------------|------------------------|-----------------------|----------------|-----------------------|---------------------------|---------------|
| Screening (Visit 1) | 129 (100%)             | 52 (100%)             | 75 (100%)      | 152 (100%)            | 139 (100%)                | 547 (100%)    |
| Visit 2             |                        | 52 (100%)             | 75 (100%)      | 152 (100%)            | 139 (100%)                | 418 (76%)     |
| Visit 3/PD          |                        |                       | 75 (100%)      | 151 (>99%)            | 139 (100%)                | 365 (67%)     |

76

For peer review only

CONFIDENTIAL

ASQ112989

dln73797: /arenv/arprod/ccil8781\_gr33343/asq112989/final/drivers/vi\_t001.sas 23AUG2010 18:39



Protocol: ASQ112989  
 Population: All Subjects Enrolled

Page 1 of 1

Table 1.03  
 Summary of Screen Failures

|                                           | Total<br>(N=547) |
|-------------------------------------------|------------------|
| -----                                     |                  |
| Screening Status                          |                  |
| Entered run-in                            | 418 (76%)        |
| Failed                                    | 129 (24%)        |
| Reason for failure                        |                  |
| Exacerbation                              | 1 (<1%)          |
| Did not meet inclusion/exclusion criteria | 126 (23%)        |
| Adverse event (unspecified)               | 0                |
| Investigator discretion                   | 1 (<1%)          |
| Withdrew consent                          | 1 (<1%)          |

Note: Subjects may have more than one reason for failure.  
 dln73797: /arenv/arprod/ccil8781\_gr33343/asq112989/final/drivers/ds\_t002\_scrn.sas 27JUL2010 20:10

1  
2  
3  
4  
5  
6  
7  
8  
9  
10  
11  
12  
13  
14  
15  
16  
17  
18  
19  
20  
21  
22  
23  
24  
25  
26  
27  
28  
29  
30  
31  
32  
33  
34  
35  
36  
37  
38  
39  
40  
41  
42  
43  
44  
45  
46  
47  
48  
49

77

Protocol: ASQ112989  
Population: Run-in

Table 1.04  
Summary of Run-In Failures

|                                    | Total<br>(N=418) |
|------------------------------------|------------------|
| Run-in Status                      |                  |
| Randomised                         | 366 (88%)        |
| Failed                             | 52 (12%)         |
| Reason for failure                 |                  |
| Adverse Event                      | 8 (2%)           |
| Protocol deviation                 | 5 (1%)           |
| Study closed/terminated            | 2 (<1%)          |
| Lost to follow-up                  | 3 (<1%)          |
| Investigator discretion            | 10 (2%)          |
| Withdrew consent                   | 10 (2%)          |
| Did not meet continuation criteria | 14 (3%)          |

78

CONFIDENTIAL

ASQ112989

dln73797: /arenv/arprod/ccil8781\_gr33343/asq112989/final/drivers/ds\_t003\_run.sas 27JUL2010 20:09

Protocol: ASQ112989  
 Population: Modified Intent-to-treat

Page 1 of 1

Table 1.05  
 Summary of Subject Disposition

|                                   | Placebo<br>(N=75) | SAL 50mcg<br>BID<br>(N=151) | FSC<br>250/50mcg<br>BID<br>(N=139) | Total<br>(N=365) |
|-----------------------------------|-------------------|-----------------------------|------------------------------------|------------------|
| Completion Status                 |                   |                             |                                    |                  |
| Completed                         | 69 (92%)          | 141 (93%)                   | 126 (91%)                          | 336 (92%)        |
| Withdrawn                         | 6 (8%)            | 10 (7%)                     | 13 (9%)                            | 29 (8%)          |
| Primary*/subreason for withdrawal |                   |                             |                                    |                  |
| Adverse Event                     | 3 (4%)            | 3 (2%)                      | 7 (5%)                             | 13 (4%)          |
| Lack of efficacy                  | 2 (3%)            | 0                           | 1 (<1%)                            | 3 (<1%)          |
| Protocol deviation                | 0                 | 0                           | 4 (3%)                             | 4 (1%)           |
| Study closed/terminated           | 0                 | 1 (<1%)                     | 0                                  | 1 (<1%)          |
| Lost to follow-up                 | 0                 | 0                           | 0                                  | 0                |
| Investigator discretion           | 0                 | 0                           | 0                                  | 0                |
| Withdrew consent                  | 1 (1%)            | 6 (4%)                      | 1 (<1%)                            | 8 (2%)           |

\* Subjects may have only one primary reason for withdrawal.

dln73797: /arenv/arprod/ccil8781\_gr33343/asq112989/final/drivers/ds\_t001.sas 27JUL2010 20:09

79

1  
2  
3  
4  
5  
6  
7  
8  
9  
10  
11  
12  
13  
14  
15  
16  
17  
18  
19  
20  
21  
22  
23  
24  
25  
26  
27  
28  
29  
30  
31  
32  
33  
34  
35  
36  
37  
38  
39  
40  
41  
42  
43  
44  
45  
46  
47  
48  
49

Protocol: ASQ112989  
Population: All Subjects Enrolled

Page 1 of 2

Table 1.06  
Summary of Number of Subjects by Centre

| Country Investigator | Screen failure (N=129) | Run-in failure (N=52) | Placebo (N=75) | SAL 50mcg BID (N=152) | FSC 250/50mcg BID (N=139) | Total (N=547) |
|----------------------|------------------------|-----------------------|----------------|-----------------------|---------------------------|---------------|
| USA                  | 129 (100%)             | 52 (100%)             | 75 (100%)      | 152 (100%)            | 139 (100%)                | 547 (100%)    |
| Abboy                | 0                      | 4 (8%)                | 3 (4%)         | 6 (4%)                | 5 (4%)                    | 18 (3%)       |
| Baker                | 3 (2%)                 | 0                     | 0              | 0                     | 0                         | 3 (<1%)       |
| Bernstein            | 1 (<1%)                | 0                     | 3 (4%)         | 6 (4%)                | 6 (4%)                    | 16 (3%)       |
| Boscia               | 4 (3%)                 | 3 (6%)                | 3 (4%)         | 5 (3%)                | 6 (4%)                    | 21 (4%)       |
| Bruya                | 1 (<1%)                | 1 (2%)                | 1 (1%)         | 4 (3%)                | 4 (3%)                    | 11 (2%)       |
| Chinsky              | 13 (10%)               | 0                     | 3 (4%)         | 7 (5%)                | 8 (6%)                    | 31 (6%)       |
| Criner               | 13 (10%)               | 2 (4%)                | 2 (3%)         | 0                     | 2 (1%)                    | 19 (3%)       |
| Elliott              | 13 (10%)               | 2 (4%)                | 1 (1%)         | 3 (2%)                | 1 (<1%)                   | 20 (4%)       |
| Erb                  | 2 (2%)                 | 3 (6%)                | 4 (5%)         | 8 (5%)                | 8 (6%)                    | 25 (5%)       |
| Feldman              | 3 (2%)                 | 5 (10%)               | 6 (8%)         | 10 (7%)               | 11 (8%)                   | 35 (6%)       |
| Fogarty              | 1 (<1%)                | 2 (4%)                | 4 (5%)         | 7 (5%)                | 7 (5%)                    | 21 (4%)       |
| Given                | 4 (3%)                 | 1 (2%)                | 1 (1%)         | 3 (2%)                | 1 (<1%)                   | 10 (2%)       |
| Gutmann              | 5 (4%)                 | 1 (2%)                | 1 (1%)         | 2 (1%)                | 0                         | 9 (2%)        |
| Haft                 | 3 (2%)                 | 0                     | 2 (3%)         | 4 (3%)                | 2 (1%)                    | 11 (2%)       |
| Hampel, Jr           | 4 (3%)                 | 1 (2%)                | 2 (3%)         | 4 (3%)                | 3 (2%)                    | 14 (3%)       |
| Harris               | 2 (2%)                 | 2 (4%)                | 1 (1%)         | 2 (1%)                | 3 (2%)                    | 10 (2%)       |
| Heyder               | 0                      | 0                     | 2 (3%)         | 3 (2%)                | 3 (2%)                    | 8 (1%)        |
| Hyers                | 1 (<1%)                | 0                     | 1 (1%)         | 3 (2%)                | 4 (3%)                    | 9 (2%)        |
| Johnson Jr.          | 3 (2%)                 | 0                     | 2 (3%)         | 5 (3%)                | 4 (3%)                    | 14 (3%)       |
| Kaelin, Jr.          | 6 (5%)                 | 2 (4%)                | 2 (3%)         | 5 (3%)                | 4 (3%)                    | 19 (3%)       |
| Kleerup              | 5 (4%)                 | 2 (4%)                | 1 (1%)         | 1 (<1%)               | 1 (<1%)                   | 10 (2%)       |
| Koser                | 1 (<1%)                | 0                     | 3 (4%)         | 7 (5%)                | 6 (4%)                    | 17 (3%)       |
| Lapidus              | 4 (3%)                 | 2 (4%)                | 1 (1%)         | 3 (2%)                | 1 (<1%)                   | 11 (2%)       |
| Noonan               | 2 (2%)                 | 1 (2%)                | 1 (1%)         | 3 (2%)                | 3 (2%)                    | 10 (2%)       |
| Patel                | 9 (7%)                 | 5 (10%)               | 1 (1%)         | 2 (1%)                | 2 (1%)                    | 19 (3%)       |
| Pudi                 | 1 (<1%)                | 0                     | 2 (3%)         | 4 (3%)                | 3 (2%)                    | 10 (2%)       |
| Ray                  | 1 (<1%)                | 1 (2%)                | 1 (1%)         | 3 (2%)                | 0                         | 6 (1%)        |
| Robinette, Jr.       | 2 (2%)                 | 0                     | 2 (3%)         | 4 (3%)                | 4 (3%)                    | 12 (2%)       |
| Sachs                | 0                      | 1 (2%)                | 0              | 0                     | 0                         | 1 (<1%)       |
| Seibert              | 0                      | 1 (2%)                | 1 (1%)         | 1 (<1%)               | 2 (1%)                    | 5 (<1%)       |

dln73797: /arenv/arprod/ccil8781\_gr33343/asq112989/final/drivers/pp\_t002\_cent.sas 27JUL2010 20:09

CONFIDENTIAL

ASQ112989

Protocol: ASQ112989  
 Population: All Subjects Enrolled

Page 2 of 2

Table 1.06  
 Summary of Number of Subjects by Centre

| Country Investigator | Screen failure (N=129) | Run-in failure (N=52) | Placebo (N=75) | SAL 50mcg BID (N=152) | FSC 250/50mcg BID (N=139) | Total (N=547) |
|----------------------|------------------------|-----------------------|----------------|-----------------------|---------------------------|---------------|
| Sibille              | 0                      | 1 (2%)                | 2 (3%)         | 2 (1%)                | 2 (1%)                    | 7 (1%)        |
| Singh                | 1 (<1%)                | 3 (6%)                | 2 (3%)         | 3 (2%)                | 4 (3%)                    | 13 (2%)       |
| Somerville           | 6 (5%)                 | 0                     | 2 (3%)         | 0                     | 4 (3%)                    | 12 (2%)       |
| Spangenthal          | 10 (8%)                | 0                     | 2 (3%)         | 6 (4%)                | 6 (4%)                    | 24 (4%)       |
| Streit               | 0                      | 0                     | 0              | 1 (<1%)               | 0                         | 1 (<1%)       |
| Sussman              | 1 (<1%)                | 0                     | 0              | 1 (<1%)               | 2 (1%)                    | 4 (<1%)       |
| Walker               | 1 (<1%)                | 3 (6%)                | 2 (3%)         | 6 (4%)                | 4 (3%)                    | 16 (3%)       |
| Weinberg             | 1 (<1%)                | 3 (6%)                | 4 (5%)         | 8 (5%)                | 8 (6%)                    | 24 (4%)       |
| Westerman            | 1 (<1%)                | 0                     | 1 (1%)         | 2 (1%)                | 0                         | 4 (<1%)       |
| Wittmer              | 1 (<1%)                | 0                     | 3 (4%)         | 8 (5%)                | 5 (4%)                    | 17 (3%)       |

81

dln73797: /arenv/arprod/ccil8781\_gr33343/asq112989/final/drivers/pp\_t002\_cent.sas 27JUL2010 20:09

CONFIDENTIAL

ASQ112989

Protocol: ASQ112989  
 Population: All Subjects Enrolled

Page 1 of 1

Table 1.07  
 Summary of Inclusion/Exclusion/Randomisation Criteria Deviations for Screen or Run-In Failures

| Criterion                        | Total<br>(N=547) |
|----------------------------------|------------------|
| Any criteria deviations          | 156 (29%)        |
| Inclusion criteria               |                  |
| Able to use a diskus             | 1 (<1%)          |
| COPD diagnosis                   | 2 (<1%)          |
| Tobacco use                      | 1 (<1%)          |
| Severity of disease              | 102 (19%)        |
| Able to use electronic diary     | 2 (<1%)          |
| Read and write English           | 1 (<1%)          |
| Evidence of dyspnea              | 13 (2%)          |
| Exclusion criteria               |                  |
| Disallowed medication            | 2 (<1%)          |
| Unable to withhold albuterol     | 1 (<1%)          |
| COPD exacerbation                | 3 (<1%)          |
| Need nocturnal positive pressure | 2 (<1%)          |
| Unable to comply                 | 5 (<1%)          |
| Asthma                           | 1 (<1%)          |
| Other respiratory disorders      | 1 (<1%)          |
| Chest X-ray                      | 5 (<1%)          |
| Other diseases/abnormalities     | 4 (<1%)          |
| Randomisation criteria           |                  |
| COPD exacerbation                | 21 (4%)          |

Note: Some run-in failures recorded criteria deviations which were not their primary reason for run-in failure

dln73797: /arenv/arprod/ccil8781\_gr33343/asq112989/final/drivers/ie\_t001\_fail.sas 23AUG2010 18:47

Protocol: ASQ112989  
 Population: Modified Intent-to-treat

Page 1 of 1

Table 1.08  
 Summary of Inclusion/Exclusion/Randomisation Criteria Deviations

| Criterion               | Placebo<br>(N=75) | SAL 50mcg<br>BID<br>(N=151) | FSC<br>250/50mcg<br>BID<br>(N=139) | Total<br>(N=365) |
|-------------------------|-------------------|-----------------------------|------------------------------------|------------------|
| Any criteria deviations | 0                 | 2 (1%)                      | 1 (<1%)                            | 3 (<1%)          |
| Inclusion criteria      |                   |                             |                                    |                  |
| Severity of disease     | 0                 | 1 (<1%)                     | 0                                  | 1 (<1%)          |
| Exclusion criteria      |                   |                             |                                    |                  |
| Disallowed medication   | 0                 | 0                           | 1 (<1%)                            | 1 (<1%)          |
| COPD exacerbation       | 0                 | 1 (<1%)                     | 0                                  | 1 (<1%)          |

For peer review only

CONFIDENTIAL

ASQ112989

dln73797: /arenv/arprod/ccil18781\_gr33343/asq112989/final/drivers/ie\_t002.sas 27JUL2010 20:09

1  
2  
3  
4  
5  
6  
7  
8  
9  
10  
11  
12  
13  
14  
15  
16  
17  
18  
19  
20  
21  
22  
23  
24  
25  
26  
27  
28  
29  
30  
31  
32  
33  
34  
35  
36  
37  
38  
39  
40  
41  
42  
43  
44  
45  
46  
47  
48  
49

83

Protocol: ASQ112989  
Population: Modified Intent-to-treat

Table 1.09  
Summary of Protocol Deviations

| Protocol deviation                                                                                         | Placebo<br>(N=75) | SAL 50mcg<br>BID<br>(N=151) | FSC<br>250/50mcg<br>BID<br>(N=139) | Total<br>(N=365) |
|------------------------------------------------------------------------------------------------------------|-------------------|-----------------------------|------------------------------------|------------------|
| Any protocol deviation                                                                                     | 3 (4%)            | 14 (9%)                     | 9 (6%)                             | 26 (7%)          |
| Violation of inclusion/exclusion criteria                                                                  | 0                 | 2 (1%)                      | 1 (<1%)                            | 3 (<1%)          |
| Post-albuterol FEV1/FVC ratio at Screening of >=0.70                                                       | 0                 | 0                           | 1 (<1%)                            | 1 (<1%)          |
| Post-albuterol % predicted FEV1 at Screening of >70.0                                                      | 0                 | 4 (3%)                      | 2 (1%)                             | 6 (2%)           |
| Receipt of any medication specified in section 5.6.2 of the protocol, except outside the specified windows | 3 (4%)            | 10 (7%)                     | 6 (4%)                             | 19 (5%)          |

84

dln73797: /arenv/arprod/ccil8781\_gr33343/asq112989/final/drivers/pd\_t001.sas 27JUL2010 20:10

CONFIDENTIAL

ASQ112989



Protocol: ASQ112989  
 Population: Run-in

Page 1 of 2

Table 1.10  
 Summary of Demographic Characteristics

|             |                     | Run-in failure<br>(N=52) | Placebo<br>(N=75) | SAL 50mcg<br>BID<br>(N=152) | FSC<br>250/50mcg<br>BID<br>(N=139) | Total<br>(N=418) |
|-------------|---------------------|--------------------------|-------------------|-----------------------------|------------------------------------|------------------|
| Age (y)     | n                   | 52                       | 75                | 152                         | 139                                | 418              |
|             | Mean                | 63.8                     | 62.8              | 60.1                        | 60.2                               | 61.1             |
|             | SD                  | 9.61                     | 9.82              | 9.58                        | 9.45                               | 9.65             |
|             | Median              | 64.5                     | 63.0              | 61.0                        | 60.0                               | 62.0             |
|             | Min.                | 45                       | 46                | 41                          | 40                                 | 40               |
|             | Max.                | 84                       | 91                | 88                          | 83                                 | 91               |
| Sex         | n                   | 52                       | 75                | 152                         | 139                                | 418              |
|             | Female              | 27 (52%)                 | 29 (39%)          | 63 (41%)                    | 60 (43%)                           | 179 (43%)        |
|             | Male                | 25 (48%)                 | 46 (61%)          | 89 (59%)                    | 79 (57%)                           | 239 (57%)        |
| Ethnicity   | n                   | 52                       | 75                | 152                         | 139                                | 418              |
|             | Hispanic/Latino     | 0                        | 0                 | 1 (<1%)                     | 1 (<1%)                            | 2 (<1%)          |
|             | Not Hispanic/Latino | 52 (100%)                | 75 (100%)         | 151 (>99%)                  | 138 (>99%)                         | 416 (>99%)       |
| Height (cm) | n                   | 51                       | 75                | 152                         | 139                                | 417              |
|             | Mean                | 169.7                    | 170.4             | 170.4                       | 170.8                              | 170.5            |
|             | SD                  | 11.60                    | 9.73              | 9.34                        | 9.84                               | 9.85             |
|             | Median              | 169.0                    | 171.0             | 172.5                       | 170.0                              | 171.0            |
|             | Min.                | 134                      | 152               | 147                         | 150                                | 134              |
|             | Max.                | 189                      | 193               | 196                         | 191                                | 196              |
| Weight (kg) | n                   | 51                       | 75                | 152                         | 139                                | 417              |
|             | Mean                | 81.58                    | 77.43             | 82.64                       | 85.22                              | 82.43            |
|             | SD                  | 21.867                   | 19.993            | 19.156                      | 24.469                             | 21.624           |
|             | Median              | 81.00                    | 76.00             | 80.90                       | 83.00                              | 80.10            |
|             | Min.                | 45.5                     | 40.8              | 45.3                        | 43.2                               | 40.8             |
|             | Max.                | 153.0                    | 136.4             | 146.0                       | 160.0                              | 160.0            |

dln73797: /arenv/arprod/ccil8781\_gr33343/asq112989/final/drivers/dm\_t001.sas 27JUL2010 20:09

CONFIDENTIAL

ASQ112989

Protocol: ASQ112989  
Population: Run-in

Table 1.10  
Summary of Demographic Characteristics

|                          |        | Run-in failure<br>(N=52) | Placebo<br>(N=75) | SAL 50mcg<br>BID<br>(N=152) | FSC<br>250/50mcg<br>BID<br>(N=139) | Total<br>(N=418) |
|--------------------------|--------|--------------------------|-------------------|-----------------------------|------------------------------------|------------------|
| BMI (kg/m <sup>2</sup> ) | n      | 51                       | 75                | 152                         | 139                                | 417              |
|                          | Mean   | 28.25                    | 26.55             | 28.45                       | 29.04                              | 28.28            |
|                          | SD     | 6.897                    | 6.131             | 6.159                       | 7.307                              | 6.680            |
|                          | Median | 27.99                    | 25.89             | 27.55                       | 28.24                              | 27.54            |
|                          | Min.   | 15.9                     | 15.0              | 16.3                        | 16.9                               | 15.0             |
|                          | Max.   | 52.3                     | 45.6              | 50.5                        | 56.7                               | 56.7             |

86

For peer review only

CONFIDENTIAL

ASQ112989

dln73797: /arenv/arprod/ccil8781\_gr33343/asq112989/final/drivers/dm\_t001.sas 27JUL2010 20:09

Protocol: ASQ112989  
 Population: Run-in

Page 1 of 1

Table 1.11  
 Summary of Race and Racial Combinations

|                                                            | Run-in failure<br>(N=52) | Placebo<br>(N=75) | SAL 50mcg<br>BID<br>(N=152) | FSC<br>250/50mcg<br>BID<br>(N=139) | Total<br>(N=418) |
|------------------------------------------------------------|--------------------------|-------------------|-----------------------------|------------------------------------|------------------|
| n                                                          | 52                       | 75                | 152                         | 139                                | 418              |
| African American/African Heritage                          | 8 (15%)                  | 9 (12%)           | 12 (8%)                     | 12 (9%)                            | 41 (10%)         |
| American Indian or Alaska Native                           | 0                        | 0                 | 0                           | 0                                  | 0                |
| Asian                                                      | 0                        | 1 (1%)            | 0                           | 0                                  | 1 (<1%)          |
| Central/South Asian Heritage                               | 0                        | 1 (1%)            | 0                           | 0                                  | 1 (<1%)          |
| Japanese/East Asian Heritage/<br>South East Asian Heritage | 0                        | 0                 | 0                           | 0                                  | 0                |
| Native Hawaiian or other Pacific<br>Islander               | 0                        | 0                 | 0                           | 0                                  | 0                |
| White                                                      | 44 (85%)                 | 65 (87%)          | 140 (92%)                   | 127 (91%)                          | 376 (90%)        |

87

CONFIDENTIAL

ASQ112989

dln73797: /arenv/arprod/ccil8781\_gr33343/asq112989/final/drivers/rc\_t001.sas 27JUL2010 20:09

Protocol: ASQ112989  
Population: Run-in

Table 1.12  
Summary of Race and Racial Combination Details

|                                           | Run-in failure (N=52) | Placebo (N=75) | SAL 50mcg BID (N=152) | FSC 250/50mcg BID (N=139) | Total (N=418) |
|-------------------------------------------|-----------------------|----------------|-----------------------|---------------------------|---------------|
| n                                         | 52                    | 75             | 152                   | 139                       | 418           |
| African American/African Heritage         | 8 (15%)               | 9 (12%)        | 12 (8%)               | 12 (9%)                   | 41 (10%)      |
| American Indian or Alaska Native          | 0                     | 0              | 0                     | 0                         | 0             |
| Asian - Central/South Asian Heritage      | 0                     | 1 (1%)         | 0                     | 0                         | 1 (<1%)       |
| Asian - East Asian Heritage               | 0                     | 0              | 0                     | 0                         | 0             |
| Asian - Japanese Heritage                 | 0                     | 0              | 0                     | 0                         | 0             |
| Asian - South East Asian Heritage         | 0                     | 0              | 0                     | 0                         | 0             |
| Asian - Mixed Race                        | 0                     | 0              | 0                     | 0                         | 0             |
| Native Hawaiian or other Pacific Islander | 0                     | 0              | 0                     | 0                         | 0             |
| White - Arabic/North African Heritage     | 1 (2%)                | 0              | 1 (<1%)               | 0                         | 2 (<1%)       |
| White - White/Caucasian/European Heritage | 43 (83%)              | 65 (87%)       | 139 (91%)             | 127 (91%)                 | 374 (89%)     |
| White - Mixed Race                        | 0                     | 0              | 0                     | 0                         | 0             |
| Mixed Race                                | 0                     | 0              | 0                     | 0                         | 0             |

88

CONFIDENTIAL

ASQ112989

dln73797: /arenv/arprod/ccil8781\_gr33343/asq112989/final/drivers/rc\_t002\_det.sas 27JUL2010 20:09

Protocol: ASQ112989  
Population: Run-in

Page 1 of 1

Table 1.13  
Summary of Current Medical Conditions

| Classification                                                      | Run-in failure (N=52) |       | Placebo (N=75) |       | SAL 50mcg BID (N=152) |       | FSC 250/50mcg BID (N=139) |        | Total (N=418) |       |
|---------------------------------------------------------------------|-----------------------|-------|----------------|-------|-----------------------|-------|---------------------------|--------|---------------|-------|
| Any Condition                                                       | 49                    | (94%) | 73             | (97%) | 149                   | (98%) | 138                       | (>99%) | 409           | (98%) |
| Blood and lymphatic system disorders                                | 5                     | (10%) | 6              | (8%)  | 15                    | (10%) | 13                        | (9%)   | 39            | (9%)  |
| Cardiac disorders                                                   | 26                    | (50%) | 48             | (64%) | 102                   | (67%) | 89                        | (64%)  | 265           | (63%) |
| Congenital, familial and genetic disorders                          | 0                     |       | 1              | (1%)  | 0                     |       | 1                         | (<1%)  | 2             | (<1%) |
| Ear and labyrinth disorders                                         | 5                     | (10%) | 9              | (12%) | 19                    | (13%) | 13                        | (9%)   | 46            | (11%) |
| Endocrine disorders                                                 | 15                    | (29%) | 12             | (16%) | 35                    | (23%) | 35                        | (25%)  | 97            | (23%) |
| Eye disorders                                                       | 19                    | (37%) | 19             | (25%) | 34                    | (22%) | 28                        | (20%)  | 100           | (24%) |
| Gastrointestinal disorders                                          | 18                    | (35%) | 29             | (39%) | 67                    | (44%) | 66                        | (47%)  | 180           | (43%) |
| General disorders and administration site conditions                | 2                     | (4%)  | 6              | (8%)  | 17                    | (11%) | 12                        | (9%)   | 37            | (9%)  |
| Hepatobiliary disorders                                             | 1                     | (2%)  | 4              | (5%)  | 5                     | (3%)  | 8                         | (6%)   | 18            | (4%)  |
| Immune system disorders                                             | 5                     | (10%) | 3              | (4%)  | 15                    | (10%) | 17                        | (12%)  | 40            | (10%) |
| Infections and infestations                                         | 0                     |       | 2              | (3%)  | 2                     | (1%)  | 2                         | (1%)   | 6             | (1%)  |
| Injury, poisoning and procedural complications                      | 0                     |       | 0              |       | 1                     | (<1%) | 0                         |        | 1             | (<1%) |
| Metabolism and nutrition disorders                                  | 7                     | (13%) | 9              | (12%) | 27                    | (18%) | 25                        | (18%)  | 68            | (16%) |
| Musculoskeletal and connective tissue disorders                     | 33                    | (63%) | 49             | (65%) | 97                    | (64%) | 95                        | (68%)  | 274           | (66%) |
| Neoplasms benign, malignant and unspecified (incl cysts and polyps) | 1                     | (2%)  | 0              |       | 4                     | (3%)  | 3                         | (2%)   | 8             | (2%)  |
| Nervous system disorders                                            | 9                     | (17%) | 15             | (20%) | 38                    | (25%) | 34                        | (24%)  | 96            | (23%) |
| Other (general)                                                     | 1                     | (2%)  | 5              | (7%)  | 9                     | (6%)  | 9                         | (6%)   | 24            | (6%)  |
| Psychiatric disorders                                               | 19                    | (37%) | 21             | (28%) | 63                    | (41%) | 47                        | (34%)  | 150           | (36%) |
| Renal and urinary disorders                                         | 6                     | (12%) | 15             | (20%) | 28                    | (18%) | 30                        | (22%)  | 79            | (19%) |
| Reproductive system and breast disorders                            | 5                     | (10%) | 11             | (15%) | 15                    | (10%) | 13                        | (9%)   | 44            | (11%) |
| Respiratory, thoracic and mediastinal disorders                     | 30                    | (58%) | 32             | (43%) | 55                    | (36%) | 53                        | (38%)  | 170           | (41%) |
| Skin and subcutaneous tissue disorders                              | 7                     | (13%) | 8              | (11%) | 17                    | (11%) | 10                        | (7%)   | 42            | (10%) |
| Vascular disorders                                                  | 10                    | (19%) | 19             | (25%) | 31                    | (20%) | 27                        | (19%)  | 87            | (21%) |

dln73797: /arenv/arprod/ccil8781\_gr33343/asq112989/final/drivers/mh\_t001\_cur.sas 27JUL2010 20:09

CONFIDENTIAL

ASQ112989

Protocol: ASQ112989  
Population: Run-in

Page 1 of 1

Table 1.14  
Summary of Past Medical Conditions

| Classification                                                         | Run-in<br>failure<br>(N=52) | Placebo<br>(N=75) | SAL 50mcg<br>BID<br>(N=152) | FSC<br>250/50mcg<br>BID<br>(N=139) | Total<br>(N=418) |
|------------------------------------------------------------------------|-----------------------------|-------------------|-----------------------------|------------------------------------|------------------|
| Any Condition                                                          | 32 (62%)                    | 43 (57%)          | 94 (62%)                    | 91 (65%)                           | 260 (62%)        |
| Blood and lymphatic system disorders                                   | 2 (4%)                      | 5 (7%)            | 4 (3%)                      | 3 (2%)                             | 14 (3%)          |
| Cardiac disorders                                                      | 0                           | 2 (3%)            | 1 (<1%)                     | 3 (2%)                             | 6 (1%)           |
| Ear and labyrinth disorders                                            | 0                           | 3 (4%)            | 3 (2%)                      | 1 (<1%)                            | 7 (2%)           |
| Endocrine disorders                                                    | 4 (8%)                      | 0                 | 3 (2%)                      | 3 (2%)                             | 10 (2%)          |
| Eye disorders                                                          | 6 (12%)                     | 3 (4%)            | 11 (7%)                     | 12 (9%)                            | 32 (8%)          |
| Gastrointestinal disorders                                             | 5 (10%)                     | 8 (11%)           | 15 (10%)                    | 11 (8%)                            | 39 (9%)          |
| General disorders and administration<br>site conditions                | 0                           | 1 (1%)            | 3 (2%)                      | 4 (3%)                             | 8 (2%)           |
| Hepatobiliary disorders                                                | 2 (4%)                      | 2 (3%)            | 3 (2%)                      | 6 (4%)                             | 13 (3%)          |
| Immune system disorders                                                | 0                           | 0                 | 1 (<1%)                     | 1 (<1%)                            | 2 (<1%)          |
| Infections and infestations                                            | 3 (6%)                      | 4 (5%)            | 9 (6%)                      | 7 (5%)                             | 23 (6%)          |
| Injury, poisoning and procedural<br>complications                      | 2 (4%)                      | 5 (7%)            | 5 (3%)                      | 3 (2%)                             | 15 (4%)          |
| Metabolism and nutrition disorders                                     | 0                           | 0                 | 0                           | 2 (1%)                             | 2 (<1%)          |
| Musculoskeletal and connective tissue<br>disorders                     | 7 (13%)                     | 3 (4%)            | 14 (9%)                     | 9 (6%)                             | 33 (8%)          |
| Neoplasms benign, malignant and<br>unspecified (incl cysts and polyps) | 7 (13%)                     | 14 (19%)          | 27 (18%)                    | 27 (19%)                           | 75 (18%)         |
| Nervous system disorders                                               | 1 (2%)                      | 3 (4%)            | 8 (5%)                      | 5 (4%)                             | 17 (4%)          |
| Other (general)                                                        | 1 (2%)                      | 3 (4%)            | 1 (<1%)                     | 1 (<1%)                            | 6 (1%)           |
| Psychiatric disorders                                                  | 2 (4%)                      | 0                 | 1 (<1%)                     | 5 (4%)                             | 8 (2%)           |
| Renal and urinary disorders                                            | 7 (13%)                     | 3 (4%)            | 13 (9%)                     | 14 (10%)                           | 37 (9%)          |
| Reproductive system and breast disorders                               | 15 (29%)                    | 14 (19%)          | 35 (23%)                    | 35 (25%)                           | 99 (24%)         |
| Respiratory, thoracic and mediastinal<br>disorders                     | 5 (10%)                     | 5 (7%)            | 15 (10%)                    | 7 (5%)                             | 32 (8%)          |
| Skin and subcutaneous tissue disorders                                 | 6 (12%)                     | 4 (5%)            | 13 (9%)                     | 14 (10%)                           | 37 (9%)          |
| Vascular disorders                                                     | 2 (4%)                      | 2 (3%)            | 5 (3%)                      | 7 (5%)                             | 16 (4%)          |

dln73797: /arenv/arprod/ccil8781\_gr33343/asq112989/final/drivers/mh\_t002\_pst.sas 27JUL2010 20:09

CONFIDENTIAL

ASQ112989

Protocol: ASQ112989  
Population: Run-in

Page 1 of 1

Table 1.15  
Summary of COPD History

|                         | Run-in failure<br>(N=52) | Placebo<br>(N=75) | SAL 50mcg<br>BID<br>(N=152) | FSC<br>250/50mcg<br>BID<br>(N=139) | Total<br>(N=418) |
|-------------------------|--------------------------|-------------------|-----------------------------|------------------------------------|------------------|
| -----                   |                          |                   |                             |                                    |                  |
| Duration of COPD        |                          |                   |                             |                                    |                  |
| n                       | 51                       | 75                | 152                         | 139                                | 417              |
| <1 year                 | 11 (22%)                 | 8 (11%)           | 19 (13%)                    | 23 (17%)                           | 61 (15%)         |
| >=1 year to <5 years    | 14 (27%)                 | 27 (36%)          | 54 (36%)                    | 46 (33%)                           | 141 (34%)        |
| >=5 years to <10 years  | 14 (27%)                 | 23 (31%)          | 47 (31%)                    | 37 (27%)                           | 121 (29%)        |
| >=10 years to <15 years | 7 (14%)                  | 5 (7%)            | 13 (9%)                     | 21 (15%)                           | 46 (11%)         |
| >=15 years to <20 years | 3 (6%)                   | 8 (11%)           | 9 (6%)                      | 9 (6%)                             | 29 (7%)          |
| >=20 years to <25 years | 2 (4%)                   | 4 (5%)            | 6 (4%)                      | 2 (1%)                             | 14 (3%)          |
| >=25 years              | 0                        | 0                 | 4 (3%)                      | 1 (<1%)                            | 5 (1%)           |
| COPD type [1]           |                          |                   |                             |                                    |                  |
| n                       | 51                       | 75                | 152                         | 138                                | 416              |
| Chronic bronchitis      | 30 (59%)                 | 43 (57%)          | 84 (55%)                    | 84 (61%)                           | 241 (58%)        |
| Emphysema               | 31 (61%)                 | 52 (69%)          | 102 (67%)                   | 90 (65%)                           | 275 (66%)        |

91

[1] Subjects can select 'Chronic bronchitis', 'Emphysema' or both  
dln73797: /arenv/arprod/ccil8781\_gr33343/asq112989/final/drivers/dd\_t001.sas 27JUL2010 20:09

CONFIDENTIAL

ASQ112989

Protocol: ASQ112989  
Population: Run-in

Page 1 of 1

Table 1.16  
Summary of COPD Exacerbation History

|                                                                                                             | Run-in<br>failure<br>(N=52) | Placebo<br>(N=75) | SAL 50mcg<br>BID<br>(N=152) | FSC<br>250/50mcg<br>BID<br>(N=139) | Total<br>(N=418) |
|-------------------------------------------------------------------------------------------------------------|-----------------------------|-------------------|-----------------------------|------------------------------------|------------------|
| -----                                                                                                       |                             |                   |                             |                                    |                  |
| Number of exacerbations in the 12 months<br>prior to Visit 1 that:                                          |                             |                   |                             |                                    |                  |
| Were managed without oral/systemic<br>corticosteroids and/or antibiotics (not<br>involving hospitalisation) |                             |                   |                             |                                    |                  |
| n                                                                                                           | 51                          | 75                | 152                         | 139                                | 417              |
| 0                                                                                                           | 48 (94%)                    | 67 (89%)          | 136 (89%)                   | 129 (93%)                          | 380 (91%)        |
| 1                                                                                                           | 2 (4%)                      | 5 (7%)            | 9 (6%)                      | 4 (3%)                             | 20 (5%)          |
| 2                                                                                                           | 1 (2%)                      | 1 (1%)            | 1 (<1%)                     | 3 (2%)                             | 6 (1%)           |
| >2                                                                                                          | 0                           | 2 (3%)            | 6 (4%)                      | 3 (2%)                             | 11 (3%)          |
| Required oral/systemic corticosteroids<br>and/or antibiotics (not involving<br>hospitalisation)             |                             |                   |                             |                                    |                  |
| n                                                                                                           | 51                          | 75                | 152                         | 139                                | 417              |
| 0                                                                                                           | 41 (80%)                    | 62 (83%)          | 116 (76%)                   | 104 (75%)                          | 323 (77%)        |
| 1                                                                                                           | 8 (16%)                     | 9 (12%)           | 23 (15%)                    | 23 (17%)                           | 63 (15%)         |
| 2                                                                                                           | 2 (4%)                      | 3 (4%)            | 8 (5%)                      | 8 (6%)                             | 21 (5%)          |
| >2                                                                                                          | 0                           | 1 (1%)            | 5 (3%)                      | 4 (3%)                             | 10 (2%)          |
| Required hospitalisation                                                                                    |                             |                   |                             |                                    |                  |
| n                                                                                                           | 51                          | 75                | 152                         | 139                                | 417              |
| 0                                                                                                           | 48 (94%)                    | 73 (97%)          | 143 (94%)                   | 132 (95%)                          | 396 (95%)        |
| 1                                                                                                           | 3 (6%)                      | 2 (3%)            | 7 (5%)                      | 7 (5%)                             | 19 (5%)          |
| 2                                                                                                           | 0                           | 0                 | 2 (1%)                      | 0                                  | 2 (<1%)          |
| >2                                                                                                          | 0                           | 0                 | 0                           | 0                                  | 0                |

dlm73797: /arenv/arprod/ccil8781\_gr33343/asq112989/final/drivers/dd\_t002.sas 27JUL2010 20:11

CONFIDENTIAL

ASQ112989



Protocol: ASQ112989  
Population: Run-in

Page 1 of 1

Table 1.17  
Summary of History of Tobacco Use

|                    | Run-in<br>(N=52) | Placebo<br>(N=75) | SAL 50mcg BID<br>(N=152) | FSC 250/50mcg<br>BID<br>(N=139) | Total<br>(N=418) |
|--------------------|------------------|-------------------|--------------------------|---------------------------------|------------------|
| -----              |                  |                   |                          |                                 |                  |
| Smoking status     |                  |                   |                          |                                 |                  |
| n                  | 51               | 75                | 152                      | 139                             | 417              |
| Current smoker     | 29 (57%)         | 46 (61%)          | 99 (65%)                 | 84 (60%)                        | 258 (62%)        |
| Former smoker      | 22 (43%)         | 29 (39%)          | 53 (35%)                 | 55 (40%)                        | 159 (38%)        |
| Years smoked       |                  |                   |                          |                                 |                  |
| n                  | 51               | 75                | 152                      | 139                             | 417              |
| Mean               | 39.5             | 40.7              | 39.4                     | 38.8                            | 39.5             |
| SD                 | 11.34            | 9.27              | 10.69                    | 10.23                           | 10.36            |
| Median             | 40.0             | 40.0              | 40.0                     | 40.0                            | 40.0             |
| Min.               | 12               | 18                | 10                       | 8                               | 8                |
| Max.               | 70               | 57                | 69                       | 63                              | 70               |
| Cigarettes/day     |                  |                   |                          |                                 |                  |
| n                  | 51               | 75                | 152                      | 139                             | 417              |
| Mean               | 26.7             | 28.6              | 27.7                     | 27.4                            | 27.7             |
| SD                 | 13.16            | 13.37             | 13.03                    | 12.66                           | 12.95            |
| Median             | 20.0             | 24.0              | 20.0                     | 20.0                            | 20.0             |
| Min.               | 6                | 10                | 10                       | 6                               | 6                |
| Max.               | 60               | 100               | 80                       | 80                              | 100              |
| Smoking pack years |                  |                   |                          |                                 |                  |
| n                  | 51               | 75                | 152                      | 139                             | 417              |
| Mean               | 53.2             | 57.8              | 55.3                     | 53.7                            | 54.9             |
| SD                 | 35.18            | 28.28             | 32.67                    | 30.55                           | 31.47            |
| Median             | 48.0             | 52.0              | 48.0                     | 47.0                            | 50.0             |
| Min.               | 12               | 14                | 12                       | 11                              | 11               |
| Max.               | 210              | 180               | 184                      | 189                             | 210              |

Note: Former smokers who stopped smoking within 6 months prior to Visit 1 have been re-classified as current smokers.

dln73797: /arenv/arprod/ccil8781\_gr33343/asq112989/final/drivers/su\_t001.sas 27JUL2010 20:11

CONFIDENTIAL

ASQ112989

Protocol: ASQ112989  
Population: Run-in

Page 1 of 2

Table 1.18  
Summary of Screening Lung Function

|                         |        | Run-in<br>failure<br>(N=52) | Placebo<br>(N=75) | SAL 50mcg<br>BID<br>(N=152) | FSC<br>250/50mcg<br>BID<br>(N=139) | Total<br>(N=418) |
|-------------------------|--------|-----------------------------|-------------------|-----------------------------|------------------------------------|------------------|
| Pre-albuterol FEV1 (L)  | n      | 51                          | 75                | 152                         | 139                                | 417              |
|                         | Mean   | 1.337                       | 1.288             | 1.395                       | 1.373                              | 1.361            |
|                         | SD     | 0.5230                      | 0.5044            | 0.5080                      | 0.5338                             | 0.5175           |
|                         | Median | 1.280                       | 1.210             | 1.340                       | 1.360                              | 1.310            |
|                         | Min.   | 0.41                        | 0.44              | 0.56                        | 0.41                               | 0.41             |
|                         | Max.   | 2.52                        | 3.05              | 2.72                        | 3.00                               | 3.05             |
| Post-albuterol FEV1 (L) | n      | 51                          | 75                | 152                         | 139                                | 417              |
|                         | Mean   | 1.425                       | 1.469             | 1.536                       | 1.532                              | 1.509            |
|                         | SD     | 0.5131                      | 0.5346            | 0.5206                      | 0.5554                             | 0.5337           |
|                         | Median | 1.360                       | 1.430             | 1.515                       | 1.510                              | 1.480            |
|                         | Min.   | 0.49                        | 0.47              | 0.46                        | 0.30                               | 0.30             |
|                         | Max.   | 2.56                        | 3.23              | 3.06                        | 3.15                               | 3.23             |
| Pre-albuterol FVC (L)   | n      | 51                          | 75                | 152                         | 139                                | 417              |
|                         | Mean   | 2.624                       | 2.586             | 2.726                       | 2.595                              | 2.645            |
|                         | SD     | 0.8422                      | 0.7843            | 0.8228                      | 0.8609                             | 0.8308           |
|                         | Median | 2.500                       | 2.510             | 2.565                       | 2.460                              | 2.520            |
|                         | Min.   | 0.88                        | 1.11              | 1.15                        | 0.80                               | 0.80             |
|                         | Max.   | 5.37                        | 4.57              | 4.62                        | 4.98                               | 5.37             |
| Post-albuterol FVC (L)  | n      | 51                          | 75                | 152                         | 139                                | 417              |
|                         | Mean   | 2.771                       | 2.873             | 2.956                       | 2.863                              | 2.887            |
|                         | SD     | 0.9286                      | 0.8926            | 0.8369                      | 0.8719                             | 0.8691           |
|                         | Median | 2.660                       | 2.810             | 2.850                       | 2.750                              | 2.810            |
|                         | Min.   | 0.70                        | 1.17              | 1.12                        | 1.14                               | 0.70             |
|                         | Max.   | 5.62                        | 5.41              | 4.78                        | 5.15                               | 5.62             |

Note: One subject recorded an FEV1=1.99L and FVC=0.7L and hence an FEV1/FVC ratio of 248%.  
One subject recorded a pre-albuterol FEV1=30L and a post-albuterol FEV1=0.3L, hence a reversibility of -90%/-2700mL. These data may not be valid.

dln73797: /arenv/arprod/ccil8781\_gr33343/asq112989/final/drivers/pf\_t001\_scr.sas 23AUG2010 18:52

CONFIDENTIAL

ASQ112989

Protocol: ASQ112989  
Population: Run-in

Page 2 of 2

Table 1.18  
Summary of Screening Lung Function

|                                     |        | Run-in<br>failure<br>(N=52) | Placebo<br>(N=75) | SAL 50mcg<br>BID<br>(N=152) | FSC<br>250/50mcg<br>BID<br>(N=139) | Total<br>(N=418) |
|-------------------------------------|--------|-----------------------------|-------------------|-----------------------------|------------------------------------|------------------|
| % predicted post-albuterol FEV1 (%) | n      | 51                          | 75                | 152                         | 139                                | 417              |
|                                     | Mean   | 50.3                        | 49.4              | 50.2                        | 49.5                               | 49.9             |
|                                     | SD     | 15.07                       | 13.10             | 13.77                       | 13.69                              | 13.75            |
|                                     | Median | 53.8                        | 49.5              | 52.6                        | 52.0                               | 52.0             |
|                                     | Min.   | 20                          | 16                | 14                          | 9                                  | 9                |
|                                     | Max.   | 70                          | 70                | 74                          | 80                                 | 80               |
| FEV1/FVC (%)                        | n      | 51                          | 75                | 152                         | 139                                | 417              |
|                                     | Mean   | 55.7                        | 51.6              | 52.2                        | 53.7                               | 53.0             |
|                                     | SD     | 35.19                       | 11.39             | 10.88                       | 11.36                              | 16.10            |
|                                     | Median | 53.3                        | 52.4              | 52.4                        | 55.8                               | 53.8             |
|                                     | Min.   | 24                          | 29                | 26                          | 7                                  | 7                |
|                                     | Max.   | 284                         | 70                | 69                          | 78                                 | 284              |
| Reversibility to albuterol (%)      | n      | 51                          | 75                | 152                         | 139                                | 417              |
|                                     | Mean   | 8.6                         | 16.7              | 11.7                        | 14.5                               | 13.1             |
|                                     | SD     | 14.38                       | 19.21             | 13.91                       | 18.53                              | 16.76            |
|                                     | Median | 7.1                         | 13.3              | 10.5                        | 12.1                               | 11.4             |
|                                     | Min.   | -20                         | -12               | -36                         | -90                                | -90              |
|                                     | Max.   | 66                          | 105               | 64                          | 73                                 | 105              |
| Reversibility to albuterol (mL)     | n      | 51                          | 75                | 152                         | 139                                | 417              |
|                                     | Mean   | 87.8                        | 180.4             | 141.3                       | 158.8                              | 147.6            |
|                                     | SD     | 165.13                      | 192.86            | 173.74                      | 308.55                             | 230.48           |
|                                     | Median | 90.0                        | 150.0             | 125.0                       | 170.0                              | 130.0            |
|                                     | Min.   | -390                        | -200              | -680                        | -2700                              | -2700            |
|                                     | Max.   | 610                         | 810               | 530                         | 980                                | 980              |

Note: One subject recorded an FEV1=1.99L and FVC=0.7L and hence an FEV1/FVC ratio of 248%.  
One subject recorded a pre-albuterol FEV1=30L and a post-albuterol FEV1=0.3L, hence a  
reversibility of -90%/-2700mL. These data may not be valid.

dln73797: /arenv/arprod/ccil8781\_gr33343/asql12989/final/drivers/pf\_t001\_scr.sas 23AUG2010 18:52

CONFIDENTIAL

ASQ112989

Protocol: ASQ112989  
Population: Run-in

Page 1 of 2

Table 1.19  
Summary of COPD Medications Taken Before the Run-in

| Ingredient                   | Run-in<br>Failure<br>(N=52) | Placebo<br>(N=75) | SAL 50mcg<br>BID<br>(N=152) | FSC<br>250/50mcg<br>BID<br>(N=139) | Total<br>(N=418) |
|------------------------------|-----------------------------|-------------------|-----------------------------|------------------------------------|------------------|
| Any medication               | 38 (73%)                    | 60 (80%)          | 115 (76%)                   | 110 (79%)                          | 323 (77%)        |
| SALBUTAMOL                   | 20 (38%)                    | 37 (49%)          | 83 (55%)                    | 68 (49%)                           | 208 (50%)        |
| IPRATROPIUM BROMIDE          | 11 (21%)                    | 16 (21%)          | 25 (16%)                    | 26 (19%)                           | 78 (19%)         |
| SALBUTAMOL SULFATE           | 13 (25%)                    | 13 (17%)          | 21 (14%)                    | 23 (17%)                           | 70 (17%)         |
| TIOTROPIUM BROMIDE           | 4 (8%)                      | 15 (20%)          | 17 (11%)                    | 30 (22%)                           | 66 (16%)         |
| PROAIR (NOS)                 | 6 (12%)                     | 4 (5%)            | 10 (7%)                     | 8 (6%)                             | 28 (7%)          |
| FORMOTEROL FUMARATE          | 0                           | 4 (5%)            | 9 (6%)                      | 8 (6%)                             | 21 (5%)          |
| SALMETEROL XINAFOATE         | 7 (13%)                     | 2 (3%)            | 5 (3%)                      | 5 (4%)                             | 19 (5%)          |
| FLUTICASONE PROPIONATE       | 6 (12%)                     | 2 (3%)            | 5 (3%)                      | 5 (4%)                             | 18 (4%)          |
| OXYGEN                       | 1 (2%)                      | 3 (4%)            | 9 (6%)                      | 3 (2%)                             | 16 (4%)          |
| EPINEPHRINE                  | 2 (4%)                      | 3 (4%)            | 0                           | 3 (2%)                             | 8 (2%)           |
| GUAIFENESIN                  | 0                           | 1 (1%)            | 1 (<1%)                     | 6 (4%)                             | 8 (2%)           |
| THEOPHYLLINE                 | 0                           | 2 (3%)            | 1 (<1%)                     | 4 (3%)                             | 7 (2%)           |
| MONTELUKAST SODIUM           | 0                           | 2 (3%)            | 1 (<1%)                     | 2 (1%)                             | 5 (1%)           |
| FLUTICASONE                  | 0                           | 0                 | 3 (2%)                      | 1 (<1%)                            | 4 (<1%)          |
| SALMETEROL                   | 0                           | 0                 | 3 (2%)                      | 1 (<1%)                            | 4 (<1%)          |
| BUDESONIDE                   | 0                           | 1 (1%)            | 2 (1%)                      | 0                                  | 3 (<1%)          |
| IPRATROPIUM                  | 2 (4%)                      | 0                 | 0                           | 1 (<1%)                            | 3 (<1%)          |
| LEVOSALBUTAMOL HYDROCHLORIDE | 1 (2%)                      | 0                 | 1 (<1%)                     | 1 (<1%)                            | 3 (<1%)          |
| PREDNISONE                   | 0                           | 0                 | 1 (<1%)                     | 2 (1%)                             | 3 (<1%)          |
| ACETYLSALICYLIC ACID         | 1 (2%)                      | 0                 | 1 (<1%)                     | 0                                  | 2 (<1%)          |
| BECLOMETASONE DIPROPIONATE   | 0                           | 1 (1%)            | 1 (<1%)                     | 0                                  | 2 (<1%)          |
| ARFORMOTEROL TARTRATE        | 0                           | 0                 | 0                           | 1 (<1%)                            | 1 (<1%)          |
| AZITHROMYCIN                 | 0                           | 0                 | 1 (<1%)                     | 0                                  | 1 (<1%)          |
| BENZONATATE                  | 0                           | 1 (1%)            | 0                           | 0                                  | 1 (<1%)          |
| EZETIMIBE                    | 0                           | 0                 | 1 (<1%)                     | 0                                  | 1 (<1%)          |
| FORMOTEROL                   | 0                           | 0                 | 0                           | 1 (<1%)                            | 1 (<1%)          |
| LEVALBUTEROL TARTRATE        | 0                           | 0                 | 0                           | 1 (<1%)                            | 1 (<1%)          |
| MOMETASONE FUROATE           | 0                           | 0                 | 0                           | 1 (<1%)                            | 1 (<1%)          |
| MOXIFLOXACIN                 | 0                           | 0                 | 0                           | 1 (<1%)                            | 1 (<1%)          |

dln73797: /arenv/arprod/ccil8781\_gr33343/asq112989/final/drivers/cm\_t001a\_copdpreri.sas 27JUL2010 20:12

CONFIDENTIAL

ASQ112989

Protocol: ASQ112989  
 Population: Run-in

Page 2 of 2

Table 1.19  
 Summary of COPD Medications Taken Before the Run-in

| Ingredient         | Run-in Failure (N=52) | Placebo (N=75) | SAL 50mcg BID (N=152) | FSC 250/50mcg BID (N=139) | Total (N=418) |
|--------------------|-----------------------|----------------|-----------------------|---------------------------|---------------|
| PIRBUTEROL ACETATE | 0                     | 0              | 0                     | 1 (<1%)                   | 1 (<1%)       |
| SIMVASTATIN        | 0                     | 0              | 1 (<1%)               | 0                         | 1 (<1%)       |
| TIOTROPIUM         | 0                     | 1 (1%)         | 0                     | 0                         | 1 (<1%)       |
| VALSARTAN          | 0                     | 0              | 0                     | 1 (<1%)                   | 1 (<1%)       |

For peer review only

97

CONFIDENTIAL

ASQ112989

dln73797: /arenv/arprod/ccil8781\_gr33343/asq112989/final/drivers/cm\_t001a\_copdpreri.sas 27JUL2010 20:12

Protocol: ASQ112989  
Population: Run-in

Page 1 of 1

Table 1.20  
Summary of COPD Medications Taken During the Run-in

| Ingredient                    | Run-in Failure<br>(N=52) | Placebo<br>(N=75) | SAL 50mcg<br>BID<br>(N=152) | FSC<br>250/50mcg<br>BID<br>(N=139) | Total<br>(N=418) |
|-------------------------------|--------------------------|-------------------|-----------------------------|------------------------------------|------------------|
| Any medication                | 18 (35%)                 | 21 (28%)          | 36 (24%)                    | 37 (27%)                           | 112 (27%)        |
| SALBUTAMOL                    | 5 (10%)                  | 9 (12%)           | 15 (10%)                    | 11 (8%)                            | 40 (10%)         |
| IPRATROPIUM BROMIDE           | 3 (6%)                   | 8 (11%)           | 15 (10%)                    | 12 (9%)                            | 38 (9%)          |
| OXYGEN                        | 1 (2%)                   | 3 (4%)            | 9 (6%)                      | 3 (2%)                             | 16 (4%)          |
| SALBUTAMOL SULFATE            | 3 (6%)                   | 3 (4%)            | 3 (2%)                      | 5 (4%)                             | 14 (3%)          |
| GUAIFENESIN                   | 0                        | 1 (1%)            | 1 (<1%)                     | 6 (4%)                             | 8 (2%)           |
| EPINEPHRINE                   | 1 (2%)                   | 1 (1%)            | 0                           | 3 (2%)                             | 5 (1%)           |
| PROAIR (NOS)                  | 2 (4%)                   | 0                 | 1 (<1%)                     | 2 (1%)                             | 5 (1%)           |
| ACETYLSALICYLIC ACID          | 1 (2%)                   | 0                 | 1 (<1%)                     | 0                                  | 2 (<1%)          |
| IPRATROPIUM                   | 1 (2%)                   | 0                 | 0                           | 1 (<1%)                            | 2 (<1%)          |
| PREDNISONE                    | 2 (4%)                   | 0                 | 0                           | 0                                  | 2 (<1%)          |
| AZITHROMYCIN                  | 1 (2%)                   | 0                 | 0                           | 0                                  | 1 (<1%)          |
| BENZONATATE                   | 0                        | 1 (1%)            | 0                           | 0                                  | 1 (<1%)          |
| BUDESONIDE                    | 1 (2%)                   | 0                 | 0                           | 0                                  | 1 (<1%)          |
| CIPROFLOXACIN HYDROCHLORIDE   | 1 (2%)                   | 0                 | 0                           | 0                                  | 1 (<1%)          |
| CLARITHROMYCIN                | 1 (2%)                   | 0                 | 0                           | 0                                  | 1 (<1%)          |
| CORTISONE ACETATE             | 1 (2%)                   | 0                 | 0                           | 0                                  | 1 (<1%)          |
| EZETIMIBE                     | 0                        | 0                 | 1 (<1%)                     | 0                                  | 1 (<1%)          |
| FORMOTEROL FUMARATE           | 1 (2%)                   | 0                 | 0                           | 0                                  | 1 (<1%)          |
| LEVOSALBUTAMOL HYDROCHLORIDE  | 0                        | 0                 | 1 (<1%)                     | 0                                  | 1 (<1%)          |
| PSEUDOEPHEDRINE HYDROCHLORIDE | 0                        | 0                 | 0                           | 1 (<1%)                            | 1 (<1%)          |
| SALMETEROL XINAFOATE          | 1 (2%)                   | 0                 | 0                           | 0                                  | 1 (<1%)          |
| SIMVASTATIN                   | 0                        | 0                 | 1 (<1%)                     | 0                                  | 1 (<1%)          |
| VALSARTAN                     | 0                        | 0                 | 0                           | 1 (<1%)                            | 1 (<1%)          |

98

dln73797: /arenv/arprod/ccil8781\_gr33343/asq112989/final/drivers/cm\_t001b\_copddurri.sas 27JUL2010 20:10

Protocol: ASQ112989  
Population: Modified Intent-to-treat

Page 1 of 2

Table 1.21  
Summary of COPD Medications Taken During Treatment

| Ingredient                             | Placebo<br>(N=75) | SAL 50mcg<br>BID<br>(N=151) | FSC<br>250/50mcg<br>BID<br>(N=139) |
|----------------------------------------|-------------------|-----------------------------|------------------------------------|
| Any medication                         | 18 (24%)          | 40 (26%)                    | 32 (23%)                           |
| IPRATROPIUM BROMIDE                    | 8 (11%)           | 17 (11%)                    | 10 (7%)                            |
| SALBUTAMOL                             | 5 (7%)            | 17 (11%)                    | 7 (5%)                             |
| OXYGEN                                 | 3 (4%)            | 9 (6%)                      | 3 (2%)                             |
| PREDNISONE                             | 3 (4%)            | 7 (5%)                      | 1 (<1%)                            |
| SALBUTAMOL SULFATE                     | 3 (4%)            | 5 (3%)                      | 3 (2%)                             |
| GUAIFENESIN                            | 1 (1%)            | 2 (1%)                      | 7 (5%)                             |
| DOXYCYCLINE                            | 0                 | 3 (2%)                      | 1 (<1%)                            |
| LEVOFLOXACIN                           | 0                 | 4 (3%)                      | 0                                  |
| TIOTROPIUM BROMIDE                     | 0                 | 1 (<1%)                     | 3 (2%)                             |
| FLUTICASONE PROPIONATE                 | 0                 | 1 (<1%)                     | 2 (1%)                             |
| METHYLPREDNISOLONE                     | 1 (1%)            | 1 (<1%)                     | 1 (<1%)                            |
| METHYLPREDNISOLONE SODIUM<br>SUCCINATE | 0                 | 3 (2%)                      | 0                                  |
| SALMETEROL XINAFOATE                   | 0                 | 1 (<1%)                     | 2 (1%)                             |
| ACETYLSALICYLIC ACID                   | 0                 | 2 (1%)                      | 0                                  |
| AMOXICILLIN TRIHYDRATE                 | 0                 | 0                           | 2 (1%)                             |
| BENZONATATE                            | 1 (1%)            | 1 (<1%)                     | 0                                  |
| CLAVULANATE POTASSIUM                  | 0                 | 0                           | 2 (1%)                             |
| DEXAMETHASONE                          | 1 (1%)            | 1 (<1%)                     | 0                                  |
| PROAIR (NOS)                           | 0                 | 0                           | 2 (1%)                             |
| AMOXICILLIN                            | 0                 | 1 (<1%)                     | 0                                  |
| AZITHROMYCIN                           | 1 (1%)            | 0                           | 0                                  |
| CEFDINIR                               | 0                 | 0                           | 1 (<1%)                            |
| CIPROFLOXACIN                          | 0                 | 1 (<1%)                     | 0                                  |
| DIHYDROCODEINE BITARTRATE              | 0                 | 0                           | 1 (<1%)                            |
| ENOXAPARIN SODIUM                      | 0                 | 1 (<1%)                     | 0                                  |
| EZETIMIBE                              | 0                 | 1 (<1%)                     | 0                                  |
| FLUTICASONE                            | 0                 | 1 (<1%)                     | 0                                  |
| FORMOTEROL FUMARATE                    | 0                 | 1 (<1%)                     | 0                                  |

dln73797: /arenv/arprod/ccil8781\_gr33343/asq112989/final/drivers/cm\_t002\_copddur.sas 27JUL2010 20:10

Protocol: ASQ112989  
Population: Modified Intent-to-treat

Table 1.21  
Summary of COPD Medications Taken During Treatment

| Ingredient                    | Placebo<br>(N=75) | SAL 50mcg<br>BID<br>(N=151) | FSC<br>250/50mcg<br>BID<br>(N=139) |
|-------------------------------|-------------------|-----------------------------|------------------------------------|
| HYDROCODONE                   | 0                 | 1 (<1%)                     | 0                                  |
| HYDROCODONE BITARTRATE        | 0                 | 1 (<1%)                     | 0                                  |
| IBUPROFEN                     | 0                 | 1 (<1%)                     | 0                                  |
| IPRATROPIUM                   | 0                 | 0                           | 1 (<1%)                            |
| KETOROLAC TROMETAMOL          | 0                 | 1 (<1%)                     | 0                                  |
| LEVOSALBUTAMOL HYDROCHLORIDE  | 0                 | 1 (<1%)                     | 0                                  |
| MOXIFLOXACIN                  | 0                 | 1 (<1%)                     | 0                                  |
| NICOTINE                      | 0                 | 1 (<1%)                     | 0                                  |
| PARACETAMOL                   | 0                 | 1 (<1%)                     | 0                                  |
| PHENYLTOLOXAMINE              | 0                 | 1 (<1%)                     | 0                                  |
| PIPERACILLIN SODIUM           | 0                 | 1 (<1%)                     | 0                                  |
| PSEUDOEPHEDRINE HYDROCHLORIDE | 0                 | 0                           | 1 (<1%)                            |
| ROBITUSSIN (NOS)              | 0                 | 1 (<1%)                     | 0                                  |
| SALMETEROL                    | 0                 | 1 (<1%)                     | 0                                  |
| SIMVASTATIN                   | 0                 | 1 (<1%)                     | 0                                  |
| TAZOBACTAM SODIUM             | 0                 | 1 (<1%)                     | 0                                  |
| TRIAMCINOLONE                 | 0                 | 1 (<1%)                     | 0                                  |
| VALSARTAN                     | 0                 | 0                           | 1 (<1%)                            |

100

CONFIDENTIAL

ASQ112989

dln73797: /arenv/arprod/ccil8781\_gr33343/asq112989/final/drivers/cm\_t002\_copddur.sas 27JUL2010 20:10



Protocol: ASQ112989  
 Population: Modified Intent-to-treat

Page 1 of 2

Table 1.22  
 Summary of COPD Medications Taken Post-Treatment

| Ingredient                   | Placebo<br>(N=75) | SAL 50mcg<br>BID<br>(N=151) | FSC<br>250/50mcg<br>BID<br>(N=139) |
|------------------------------|-------------------|-----------------------------|------------------------------------|
| Any medication               | 38 (51%)          | 79 (52%)                    | 70 (50%)                           |
| SALBUTAMOL                   | 22 (29%)          | 50 (33%)                    | 37 (27%)                           |
| IPRATROPIUM BROMIDE          | 9 (12%)           | 16 (11%)                    | 11 (8%)                            |
| TIOTROPIUM BROMIDE           | 8 (11%)           | 8 (5%)                      | 17 (12%)                           |
| SALBUTAMOL SULFATE           | 6 (8%)            | 9 (6%)                      | 10 (7%)                            |
| SALMETEROL XINAFOATE         | 4 (5%)            | 12 (8%)                     | 7 (5%)                             |
| FLUTICASONE PROPIONATE       | 3 (4%)            | 12 (8%)                     | 7 (5%)                             |
| OXYGEN                       | 3 (4%)            | 9 (6%)                      | 3 (2%)                             |
| FORMOTEROL FUMARATE          | 1 (1%)            | 8 (5%)                      | 5 (4%)                             |
| PROAIR (NOS)                 | 3 (4%)            | 7 (5%)                      | 2 (1%)                             |
| PREDNISONE                   | 2 (3%)            | 6 (4%)                      | 1 (<1%)                            |
| GUAIFENESIN                  | 1 (1%)            | 1 (<1%)                     | 6 (4%)                             |
| BUDESONIDE                   | 1 (1%)            | 4 (3%)                      | 1 (<1%)                            |
| ACETYLSALICYLIC ACID         | 0                 | 2 (1%)                      | 0                                  |
| AMOXICILLIN TRIHYDRATE       | 0                 | 0                           | 2 (1%)                             |
| BENZONATATE                  | 1 (1%)            | 1 (<1%)                     | 0                                  |
| CLAVULANATE POTASSIUM        | 0                 | 0                           | 2 (1%)                             |
| DOXYCYCLINE                  | 0                 | 2 (1%)                      | 0                                  |
| LEVOFLOXACIN                 | 0                 | 2 (1%)                      | 0                                  |
| AMOXICILLIN                  | 1 (1%)            | 0                           | 0                                  |
| BECLOMETASONE DIPROPIONATE   | 0                 | 0                           | 1 (<1%)                            |
| CEFDINIR                     | 0                 | 0                           | 1 (<1%)                            |
| CIPROFLOXACIN                | 0                 | 1 (<1%)                     | 0                                  |
| EZETIMIBE                    | 0                 | 1 (<1%)                     | 0                                  |
| FLUTICASONE                  | 0                 | 1 (<1%)                     | 0                                  |
| FORMOTEROL                   | 0                 | 0                           | 1 (<1%)                            |
| IBUPROFEN                    | 0                 | 1 (<1%)                     | 0                                  |
| IPRATROPIUM                  | 0                 | 0                           | 1 (<1%)                            |
| KETOROLAC TROMETAMOL         | 0                 | 1 (<1%)                     | 0                                  |
| LEVOSALBUTAMOL HYDROCHLORIDE | 0                 | 0                           | 1 (<1%)                            |

dln73797: /arenv/arprod/ccil18781\_gr33343/asq112989/final/drivers/cm\_t003\_copdpst.sas 27JUL2010 20:12

101

CONFIDENTIAL

ASQ112989

Protocol: ASQ112989  
Population: Modified Intent-to-treat

Table 1.22  
Summary of COPD Medications Taken Post-Treatment

| Ingredient         | Placebo<br>(N=75) | SAL 50mcg<br>BID<br>(N=151) | FSC<br>250/50mcg<br>BID<br>(N=139) |
|--------------------|-------------------|-----------------------------|------------------------------------|
| NICOTINE           | 0                 | 1 (<1%)                     | 0                                  |
| PARACETAMOL        | 0                 | 1 (<1%)                     | 0                                  |
| PIRBUTEROL ACETATE | 0                 | 0                           | 1 (<1%)                            |
| ROBITUSSIN (NOS)   | 0                 | 1 (<1%)                     | 0                                  |
| SALMETEROL         | 0                 | 1 (<1%)                     | 0                                  |
| SIMVASTATIN        | 0                 | 1 (<1%)                     | 0                                  |
| TETRACYCLINE       | 0                 | 0                           | 1 (<1%)                            |
| TIOTROPIUM         | 0                 | 1 (<1%)                     | 0                                  |
| VALSARTAN          | 0                 | 0                           | 1 (<1%)                            |

For peer review only

CONFIDENTIAL

ASQ112989

dln73797: /arenv/arprod/ccil8781\_gr33343/asq112989/final/drivers/cm\_t003\_copdpst.sas 27JUL2010 20:12

1  
2  
3  
4  
5  
6  
7  
8  
9  
10  
11  
12  
13  
14  
15  
16  
17  
18  
19  
20  
21  
22  
23  
24  
25  
26  
27  
28  
29  
30  
31  
32  
33  
34  
35  
36  
37  
38  
39  
40  
41  
42  
43  
44  
45  
46  
47  
48  
49

102

Protocol: ASQ112989  
Population: Run-in

Page 1 of 23

Table 1.23  
Summary of Non-COPD Medications Taken During the Run-in

| ATC Level 1<br>Ingredient | Run-in<br>Failure<br>(N=52) | Placebo<br>(N=75) | SAL 50mcg<br>BID<br>(N=152) | FSC<br>250/50mcg<br>BID<br>(N=139) | Total<br>(N=418) |
|---------------------------|-----------------------------|-------------------|-----------------------------|------------------------------------|------------------|
| Any medication            | 44 (85%)                    | 62 (83%)          | 135 (89%)                   | 126 (91%)                          | 367 (88%)        |
| NERVOUS SYSTEM            |                             |                   |                             |                                    |                  |
| Any medication            | 36 (69%)                    | 47 (63%)          | 102 (67%)                   | 97 (70%)                           | 282 (67%)        |
| ACETYLSALICYLIC ACID      | 13 (25%)                    | 20 (27%)          | 46 (30%)                    | 49 (35%)                           | 128 (31%)        |
| PARACETAMOL               | 12 (23%)                    | 12 (16%)          | 40 (26%)                    | 32 (23%)                           | 96 (23%)         |
| IBUPROFEN                 | 5 (10%)                     | 9 (12%)           | 19 (13%)                    | 12 (9%)                            | 45 (11%)         |
| ALPRAZOLAM                | 6 (12%)                     | 4 (5%)            | 8 (5%)                      | 9 (6%)                             | 27 (6%)          |
| GABAPENTIN                | 3 (6%)                      | 2 (3%)            | 6 (4%)                      | 7 (5%)                             | 18 (4%)          |
| HYDROCODONE               | 2 (4%)                      | 2 (3%)            | 6 (4%)                      | 3 (2%)                             | 13 (3%)          |
| TRAZODONE                 | 0                           | 2 (3%)            | 3 (2%)                      | 6 (4%)                             | 11 (3%)          |
| SERTRALINE HYDROCHLORIDE  | 3 (6%)                      | 0                 | 3 (2%)                      | 4 (3%)                             | 10 (2%)          |
| CLONAZEPAM                | 0                           | 1 (1%)            | 2 (1%)                      | 6 (4%)                             | 9 (2%)           |
| CLONIDINE                 | 0                           | 0                 | 4 (3%)                      | 5 (4%)                             | 9 (2%)           |
| DULOXETINE                | 1 (2%)                      | 3 (4%)            | 3 (2%)                      | 1 (<1%)                            | 8 (2%)           |
| FLUOXETINE HYDROCHLORIDE  | 1 (2%)                      | 2 (3%)            | 2 (1%)                      | 3 (2%)                             | 8 (2%)           |
| LORAZEPAM                 | 3 (6%)                      | 0                 | 2 (1%)                      | 3 (2%)                             | 8 (2%)           |
| ESCITALOPRAM OXALATE      | 1 (2%)                      | 1 (1%)            | 2 (1%)                      | 3 (2%)                             | 7 (2%)           |
| PAROXETINE HYDROCHLORIDE  | 1 (2%)                      | 1 (1%)            | 2 (1%)                      | 3 (2%)                             | 7 (2%)           |
| ZOLPIDEM TARTRATE         | 2 (4%)                      | 1 (1%)            | 1 (<1%)                     | 3 (2%)                             | 7 (2%)           |
| VENLAFAXINE HYDROCHLORIDE | 2 (4%)                      | 0                 | 3 (2%)                      | 1 (<1%)                            | 6 (1%)           |
| AMITRIPTYLINE             | 2 (4%)                      | 0                 | 2 (1%)                      | 1 (<1%)                            | 5 (1%)           |
| BUPROPION HYDROCHLORIDE   | 0                           | 1 (1%)            | 1 (<1%)                     | 3 (2%)                             | 5 (1%)           |
| CAFFEINE                  | 1 (2%)                      | 0                 | 3 (2%)                      | 1 (<1%)                            | 5 (1%)           |
| CITALOPRAM HYDROBROMIDE   | 0                           | 1 (1%)            | 2 (1%)                      | 2 (1%)                             | 5 (1%)           |

Note: A medication may be included in more than one ATC Level category and appear more than once.

Note: The following ingredient terms, which do not have an associated ATC Level 1 term, were also taken during Run-in with the following frequencies: Bovine Prostate: SAL 50mcg-1 subject, <1%, Capsicum Annuum: SAL 50mcg-1 subject, <1%, Dextroamphetamine Saccharate: Placebo-1 subject, 1%, Lactoperoxidase: Placebo-1 subject, 1%, and Zinc Arginate: SAL 50mcg-1 subject, <1%.

dln73797: /arenv/arprod/ccil18781\_gr33343/asq112989/final/drivers/cm\_t004\_noncopddurri.sas 24AUG2010 15:26

103

CONFIDENTIAL

ASQ112989

Protocol: ASQ112989  
Population: Run-in

Page 2 of 23

Table 1.23  
Summary of Non-COPD Medications Taken During the Run-in

| ATC Level 1<br>Ingredient   | Run-in<br>Failure<br>(N=52) | Placebo<br>(N=75) | SAL 50mcg<br>BID<br>(N=152) | FSC<br>250/50mcg<br>BID<br>(N=139) | Total<br>(N=418) |
|-----------------------------|-----------------------------|-------------------|-----------------------------|------------------------------------|------------------|
| CYCLOBENZAPRINE             | 1 (2%)                      | 1 (1%)            | 0                           | 3 (2%)                             | 5 (1%)           |
| HYDROCHLORIDE               |                             |                   |                             |                                    |                  |
| DIAZEPAM                    | 0                           | 0                 | 4 (3%)                      | 1 (<1%)                            | 5 (1%)           |
| OXYCODONE HYDROCHLORIDE     | 0                           | 0                 | 2 (1%)                      | 3 (2%)                             | 5 (1%)           |
| TEMAZEPAM                   | 0                           | 1 (1%)            | 3 (2%)                      | 1 (<1%)                            | 5 (1%)           |
| ARIPIPIRAZOLE               | 1 (2%)                      | 1 (1%)            | 1 (<1%)                     | 1 (<1%)                            | 4 (<1%)          |
| BUPROPION                   | 0                           | 2 (3%)            | 1 (<1%)                     | 1 (<1%)                            | 4 (<1%)          |
| CITALOPRAM                  | 1 (2%)                      | 1 (1%)            | 1 (<1%)                     | 1 (<1%)                            | 4 (<1%)          |
| ROPINIROLE HYDROCHLORIDE    | 0                           | 0                 | 1 (<1%)                     | 3 (2%)                             | 4 (<1%)          |
| TRAMADOL HYDROCHLORIDE      | 0                           | 1 (1%)            | 1 (<1%)                     | 2 (1%)                             | 4 (<1%)          |
| AMITRIPTYLINE HYDROCHLORIDE | 0                           | 0                 | 1 (<1%)                     | 2 (1%)                             | 3 (<1%)          |
| DOXYLAMINE SUCCINATE        | 1 (2%)                      | 1 (1%)            | 0                           | 1 (<1%)                            | 3 (<1%)          |
| ESZOPICLONE                 | 1 (2%)                      | 1 (1%)            | 1 (<1%)                     | 0                                  | 3 (<1%)          |
| HYDROXYZINE                 | 1 (2%)                      | 0                 | 2 (1%)                      | 0                                  | 3 (<1%)          |
| LAMOTRIGINE                 | 1 (2%)                      | 0                 | 0                           | 2 (1%)                             | 3 (<1%)          |
| OLANZAPINE                  | 0                           | 1 (1%)            | 1 (<1%)                     | 1 (<1%)                            | 3 (<1%)          |
| OXYCODONE                   | 0                           | 0                 | 1 (<1%)                     | 2 (1%)                             | 3 (<1%)          |
| PAROXETINE                  | 0                           | 0                 | 3 (2%)                      | 0                                  | 3 (<1%)          |
| PHENYTOIN                   | 2 (4%)                      | 0                 | 1 (<1%)                     | 0                                  | 3 (<1%)          |
| PREGABALIN                  | 0                           | 1 (1%)            | 0                           | 2 (1%)                             | 3 (<1%)          |
| ROPINIROLE                  | 2 (4%)                      | 0                 | 0                           | 1 (<1%)                            | 3 (<1%)          |
| SERTRALINE                  | 0                           | 0                 | 0                           | 3 (2%)                             | 3 (<1%)          |
| TRAMADOL                    | 1 (2%)                      | 1 (1%)            | 0                           | 1 (<1%)                            | 3 (<1%)          |
| VARENICLINE TARTRATE        | 0                           | 2 (3%)            | 0                           | 1 (<1%)                            | 3 (<1%)          |
| CAPSAICIN                   | 0                           | 0                 | 0                           | 2 (1%)                             | 2 (<1%)          |
| CLONIDINE HYDROCHLORIDE     | 0                           | 0                 | 1 (<1%)                     | 1 (<1%)                            | 2 (<1%)          |

Note: A medication may be included in more than one ATC Level category and appear more than once.

Note: The following ingredient terms, which do not have an associated ATC Level 1 term, were also taken during Run-in with the following frequencies: Bovine Prostate: SAL 50mcg-1 subject, <1%, Capsicum Annuum: SAL 50mcg-1 subject, <1%, Dextroamphetamine Saccharate: Placebo-1 subject, 1%, Lactoperoxidase: Placebo-1 subject, 1%, and Zinc Arginate: SAL 50mcg-1 subject, <1%.

dln73797: /arenv/arprod/ccil18781\_gr33343/asq112989/final/drivers/cm\_t004\_noncopddurri.sas 24AUG2010 15:26

104

CONFIDENTIAL

ASQ112989

Protocol: ASQ112989  
Population: Run-in

Page 3 of 23

Table 1.23  
Summary of Non-COPD Medications Taken During the Run-in

| ATC Level 1<br>Ingredient    | Run-in<br>Failure<br>(N=52) | Placebo<br>(N=75) | SAL 50mcg<br>BID<br>(N=152) | FSC<br>250/50mcg<br>BID<br>(N=139) | Total<br>(N=418) |
|------------------------------|-----------------------------|-------------------|-----------------------------|------------------------------------|------------------|
| CYCLOBENZAPRINE              | 0                           | 0                 | 1 (<1%)                     | 1 (<1%)                            | 2 (<1%)          |
| DEXTROPROPOXYPHENE NAPSILATE | 0                           | 0                 | 0                           | 2 (1%)                             | 2 (<1%)          |
| HYDROXYZINE HYDROCHLORIDE    | 0                           | 1 (1%)            | 1 (<1%)                     | 0                                  | 2 (<1%)          |
| LIDOCAINE                    | 0                           | 0                 | 2 (1%)                      | 0                                  | 2 (<1%)          |
| NORTRIPTYLINE                | 0                           | 1 (1%)            | 0                           | 1 (<1%)                            | 2 (<1%)          |
| QUETIAPINE FUMARATE          | 0                           | 1 (1%)            | 0                           | 1 (<1%)                            | 2 (<1%)          |
| TOMEXETINE HYDROCHLORIDE     | 1 (2%)                      | 0                 | 0                           | 1 (<1%)                            | 2 (<1%)          |
| VALPROIC ACID                | 1 (2%)                      | 0                 | 0                           | 1 (<1%)                            | 2 (<1%)          |
| VENLAFAXINE                  | 1 (2%)                      | 1 (1%)            | 0                           | 0                                  | 2 (<1%)          |
| AMFETAMINE ASPARTATE         | 0                           | 1 (1%)            | 0                           | 0                                  | 1 (<1%)          |
| AMFETAMINE SULFATE           | 0                           | 1 (1%)            | 0                           | 0                                  | 1 (<1%)          |
| BECLAMIDE                    | 0                           | 0                 | 0                           | 1 (<1%)                            | 1 (<1%)          |
| BENZODIAZEPINE, NOS          | 0                           | 0                 | 1 (<1%)                     | 0                                  | 1 (<1%)          |
| BETHANECHOL CHLORIDE         | 0                           | 0                 | 1 (<1%)                     | 0                                  | 1 (<1%)          |
| BUPRENORPHINE HYDROCHLORIDE  | 0                           | 0                 | 0                           | 1 (<1%)                            | 1 (<1%)          |
| BUSPIRONE                    | 0                           | 0                 | 1 (<1%)                     | 0                                  | 1 (<1%)          |
| BUSPIRONE HYDROCHLORIDE      | 0                           | 0                 | 1 (<1%)                     | 0                                  | 1 (<1%)          |
| CARBAMAZEPINE                | 0                           | 0                 | 0                           | 1 (<1%)                            | 1 (<1%)          |
| COCAINE                      | 0                           | 0                 | 0                           | 1 (<1%)                            | 1 (<1%)          |
| CODEINE                      | 0                           | 0                 | 0                           | 1 (<1%)                            | 1 (<1%)          |
| CRACK COCAINE                | 0                           | 0                 | 0                           | 1 (<1%)                            | 1 (<1%)          |
| DEXAMFETAMINE SULFATE        | 0                           | 1 (1%)            | 0                           | 0                                  | 1 (<1%)          |
| DIPOTASSIUM CLORAZEPATE      | 0                           | 0                 | 0                           | 1 (<1%)                            | 1 (<1%)          |
| EXCEDRIN (NOS)               | 0                           | 0                 | 1 (<1%)                     | 0                                  | 1 (<1%)          |
| FENTANYL                     | 0                           | 1 (1%)            | 0                           | 0                                  | 1 (<1%)          |
| FLUOXETINE                   | 0                           | 1 (1%)            | 0                           | 0                                  | 1 (<1%)          |

Note: A medication may be included in more than one ATC Level category and appear more than once.

Note: The following ingredient terms, which do not have an associated ATC Level 1 term, were also taken during Run-in with the following frequencies: Bovine Prostate: SAL 50mcg-1 subject, <1%, Capsicum Annuum: SAL 50mcg-1 subject, <1%, Dextroamphetamine Saccharate: Placebo-1 subject, 1%, Lactoperoxidase: Placebo-1 subject, 1%, and Zinc Arginate: SAL 50mcg-1 subject, <1%.

dln73797: /arenv/arprod/ccil18781\_gr33343/asq112989/final/drivers/cm\_t004\_noncopddurri.sas 24AUG2010 15:26

105

CONFIDENTIAL

ASQ112989

Protocol: ASQ112989  
Population: Run-in

Page 4 of 23

Table 1.23  
Summary of Non-COPD Medications Taken During the Run-in

| ATC Level 1<br>Ingredient        | Run-in<br>Failure<br>(N=52) | Placebo<br>(N=75) | SAL 50mcg<br>BID<br>(N=152) | FSC<br>250/50mcg<br>BID<br>(N=139) | Total<br>(N=418) |
|----------------------------------|-----------------------------|-------------------|-----------------------------|------------------------------------|------------------|
| HYDROMORPHONE HYDROCHLORIDE      | 1 (2%)                      | 0                 | 0                           | 0                                  | 1 (<1%)          |
| KETOROLAC TROMETAMOL             | 0                           | 1 (1%)            | 0                           | 0                                  | 1 (<1%)          |
| LEVETIRACETAM                    | 1 (2%)                      | 0                 | 0                           | 0                                  | 1 (<1%)          |
| METHYLPHENIDATE<br>HYDROCHLORIDE | 0                           | 0                 | 0                           | 1 (<1%)                            | 1 (<1%)          |
| MIDAZOLAM                        | 0                           | 1 (1%)            | 0                           | 0                                  | 1 (<1%)          |
| MIRTAZAPINE                      | 0                           | 0                 | 0                           | 1 (<1%)                            | 1 (<1%)          |
| MORPHINE                         | 0                           | 0                 | 0                           | 1 (<1%)                            | 1 (<1%)          |
| NICOTINE                         | 0                           | 0                 | 0                           | 1 (<1%)                            | 1 (<1%)          |
| PHENOBARBITAL                    | 0                           | 0                 | 1 (<1%)                     | 0                                  | 1 (<1%)          |
| PRAMIPEXOLE DIHYDROCHLORIDE      | 0                           | 0                 | 0                           | 1 (<1%)                            | 1 (<1%)          |
| PROMETHAZINE                     | 0                           | 1 (1%)            | 0                           | 0                                  | 1 (<1%)          |
| SALICYLAMIDE                     | 1 (2%)                      | 0                 | 0                           | 0                                  | 1 (<1%)          |
| SULTOPRIDE                       | 0                           | 1 (1%)            | 0                           | 0                                  | 1 (<1%)          |
| TRAZODONE HYDROCHLORIDE          | 0                           | 0                 | 1 (<1%)                     | 0                                  | 1 (<1%)          |
| ZOLPIDEM                         | 1 (2%)                      | 0                 | 0                           | 0                                  | 1 (<1%)          |
| ALIMENTARY TRACT AND METABOLISM  |                             |                   |                             |                                    |                  |
| Any medication                   | 34 (65%)                    | 40 (53%)          | 90 (59%)                    | 93 (67%)                           | 257 (61%)        |
| ACETYLSALICYLIC ACID             | 13 (25%)                    | 20 (27%)          | 46 (30%)                    | 49 (35%)                           | 128 (31%)        |
| VITAMINS NOS                     | 9 (17%)                     | 11 (15%)          | 16 (11%)                    | 22 (16%)                           | 58 (14%)         |
| OMEPRAZOLE                       | 4 (8%)                      | 5 (7%)            | 19 (13%)                    | 16 (12%)                           | 44 (11%)         |
| CALCIUM                          | 3 (6%)                      | 5 (7%)            | 7 (5%)                      | 13 (9%)                            | 28 (7%)          |
| METFORMIN                        | 3 (6%)                      | 0                 | 6 (4%)                      | 10 (7%)                            | 19 (5%)          |
| ASCORBIC ACID                    | 4 (8%)                      | 3 (4%)            | 9 (6%)                      | 2 (1%)                             | 18 (4%)          |

Note: A medication may be included in more than one ATC Level category and appear more than once.

Note: The following ingredient terms, which do not have an associated ATC Level 1 term, were also taken during Run-in with the following frequencies: Bovine Prostate: SAL 50mcg-1 subject, <1%, Capsicum Annuum: SAL 50mcg-1 subject, <1%, Dextroamphetamine Saccharate: Placebo-1 subject, 1%, Lactoperoxidase: Placebo-1 subject, 1%, and Zinc Arginate: SAL 50mcg-1 subject, <1%.

dln73797: /arenv/arprod/ccil18781\_gr33343/asq112989/final/drivers/cm\_t004\_noncopddurri.sas 24AUG2010 15:26

106

CONFIDENTIAL

ASQ112989

Protocol: ASQ112989  
Population: Run-in

Page 5 of 23

Table 1.23  
Summary of Non-COPD Medications Taken During the Run-in

| ATC Level 1<br>Ingredient  | Run-in<br>Failure<br>(N=52) | Placebo<br>(N=75) | SAL 50mcg<br>BID<br>(N=152) | FSC<br>250/50mcg<br>BID<br>(N=139) | Total<br>(N=418) |
|----------------------------|-----------------------------|-------------------|-----------------------------|------------------------------------|------------------|
| ERGOCALCIFEROL             | 2 (4%)                      | 2 (3%)            | 4 (3%)                      | 6 (4%)                             | 14 (3%)          |
| ESOMEPRAZOLE MAGNESIUM     | 2 (4%)                      | 1 (1%)            | 5 (3%)                      | 6 (4%)                             | 14 (3%)          |
| MINERALS NOS               | 2 (4%)                      | 4 (5%)            | 3 (2%)                      | 4 (3%)                             | 13 (3%)          |
| POTASSIUM CHLORIDE         | 0                           | 3 (4%)            | 4 (3%)                      | 6 (4%)                             | 13 (3%)          |
| VITAMIN D NOS              | 2 (4%)                      | 3 (4%)            | 4 (3%)                      | 4 (3%)                             | 13 (3%)          |
| METFORMIN HYDROCHLORIDE    | 1 (2%)                      | 2 (3%)            | 2 (1%)                      | 7 (5%)                             | 12 (3%)          |
| PANTOPRAZOLE               | 1 (2%)                      | 1 (1%)            | 2 (1%)                      | 7 (5%)                             | 11 (3%)          |
| RANITIDINE                 | 2 (4%)                      | 3 (4%)            | 5 (3%)                      | 1 (<1%)                            | 11 (3%)          |
| TOCOPHEROL                 | 3 (6%)                      | 2 (3%)            | 4 (3%)                      | 2 (1%)                             | 11 (3%)          |
| FAMOTIDINE                 | 0                           | 2 (3%)            | 1 (<1%)                     | 5 (4%)                             | 8 (2%)           |
| GLIPIZIDE                  | 0                           | 1 (1%)            | 4 (3%)                      | 3 (2%)                             | 8 (2%)           |
| RANITIDINE HYDROCHLORIDE   | 1 (2%)                      | 1 (1%)            | 4 (3%)                      | 2 (1%)                             | 8 (2%)           |
| CALCIUM CARBONATE          | 1 (2%)                      | 2 (3%)            | 1 (<1%)                     | 3 (2%)                             | 7 (2%)           |
| LANSOPRAZOLE               | 1 (2%)                      | 0                 | 4 (3%)                      | 2 (1%)                             | 7 (2%)           |
| GLIBENCLAMIDE              | 1 (2%)                      | 1 (1%)            | 3 (2%)                      | 1 (<1%)                            | 6 (1%)           |
| GLIMEPIRIDE                | 2 (4%)                      | 0                 | 1 (<1%)                     | 3 (2%)                             | 6 (1%)           |
| INSULIN GLARGINE           | 3 (6%)                      | 0                 | 1 (<1%)                     | 2 (1%)                             | 6 (1%)           |
| POTASSIUM NOS              | 1 (2%)                      | 0                 | 3 (2%)                      | 2 (1%)                             | 6 (1%)           |
| LOPERAMIDE HYDROCHLORIDE   | 1 (2%)                      | 1 (1%)            | 0                           | 2 (1%)                             | 4 (<1%)          |
| PLANTAGO OVATA             | 1 (2%)                      | 0                 | 1 (<1%)                     | 2 (1%)                             | 4 (<1%)          |
| SITAGLIPTIN                | 1 (2%)                      | 0                 | 1 (<1%)                     | 2 (1%)                             | 4 (<1%)          |
| DEXLANSOPRAZOLE            | 0                           | 0                 | 2 (1%)                      | 1 (<1%)                            | 3 (<1%)          |
| HYDROCORTISONE             | 1 (2%)                      | 0                 | 2 (1%)                      | 0                                  | 3 (<1%)          |
| INSULIN ASPART             | 1 (2%)                      | 1 (1%)            | 1 (<1%)                     | 0                                  | 3 (<1%)          |
| INSULIN DETEMIR            | 1 (2%)                      | 2 (3%)            | 0                           | 0                                  | 3 (<1%)          |
| PIOGLITAZONE HYDROCHLORIDE | 1 (2%)                      | 1 (1%)            | 0                           | 1 (<1%)                            | 3 (<1%)          |

Note: A medication may be included in more than one ATC Level category and appear more than once.

Note: The following ingredient terms, which do not have an associated ATC Level 1 term, were also taken during Run-in with the following frequencies: Bovine Prostate: SAL 50mcg-1 subject, <1%, Capsicum Annuum: SAL 50mcg-1 subject, <1%, Dextroamphetamine Saccharate: Placebo-1 subject, 1%, Lactoperoxidase: Placebo-1 subject, 1%, and Zinc Arginate: SAL 50mcg-1 subject, <1%.

dln73797: /arenv/arprod/ccil8781\_gr33343/asq112989/final/drivers/cm\_t004\_noncopddurri.sas 24AUG2010 15:26

107

CONFIDENTIAL

ASQ112989

Protocol: ASQ112989  
Population: Run-in

Page 6 of 23

Table 1.23  
Summary of Non-COPD Medications Taken During the Run-in

| ATC Level 1<br>Ingredient            | Run-in<br>Failure<br>(N=52) | Placebo<br>(N=75) | SAL 50mcg<br>BID<br>(N=152) | FSC<br>250/50mcg<br>BID<br>(N=139) | Total<br>(N=418) |
|--------------------------------------|-----------------------------|-------------------|-----------------------------|------------------------------------|------------------|
| PREDNISONE                           | 3 (6%)                      | 0                 | 0                           | 0                                  | 3 (<1%)          |
| PYRIDOXINE HYDROCHLORIDE             | 0                           | 0                 | 2 (1%)                      | 1 (<1%)                            | 3 (<1%)          |
| SENNA                                | 1 (2%)                      | 0                 | 0                           | 2 (1%)                             | 3 (<1%)          |
| THIAMINE HYDROCHLORIDE               | 0                           | 1 (1%)            | 1 (<1%)                     | 1 (<1%)                            | 3 (<1%)          |
| ZINC                                 | 0                           | 1 (1%)            | 1 (<1%)                     | 1 (<1%)                            | 3 (<1%)          |
| BETACAROTENE                         | 0                           | 0                 | 2 (1%)                      | 0                                  | 2 (<1%)          |
| CALCIUM CITRATE                      | 0                           | 1 (1%)            | 0                           | 1 (<1%)                            | 2 (<1%)          |
| CINNAMOMUM VERUM                     | 0                           | 0                 | 0                           | 2 (1%)                             | 2 (<1%)          |
| COLECALCIFEROL                       | 0                           | 0                 | 0                           | 2 (1%)                             | 2 (<1%)          |
| COPPER                               | 0                           | 0                 | 2 (1%)                      | 0                                  | 2 (<1%)          |
| DOCUSATE SODIUM                      | 1 (2%)                      | 1 (1%)            | 0                           | 0                                  | 2 (<1%)          |
| HYOSCYAMINE SULFATE                  | 0                           | 1 (1%)            | 1 (<1%)                     | 0                                  | 2 (<1%)          |
| INSULIN HUMAN                        | 1 (2%)                      | 1 (1%)            | 0                           | 0                                  | 2 (<1%)          |
| INSULIN HUMAN INJECTION,<br>ISOPHANE | 0                           | 1 (1%)            | 0                           | 1 (<1%)                            | 2 (<1%)          |
| LACTOBACILLUS ACIDOPHILUS            | 1 (2%)                      | 1 (1%)            | 0                           | 0                                  | 2 (<1%)          |
| MAGNESIUM OXIDE                      | 0                           | 0                 | 2 (1%)                      | 0                                  | 2 (<1%)          |
| METRONIDAZOLE                        | 1 (2%)                      | 0                 | 1 (<1%)                     | 0                                  | 2 (<1%)          |
| RABEPRAZOLE SODIUM                   | 0                           | 0                 | 1 (<1%)                     | 1 (<1%)                            | 2 (<1%)          |
| RETINOL                              | 1 (2%)                      | 0                 | 1 (<1%)                     | 0                                  | 2 (<1%)          |
| RIBOFLAVIN                           | 0                           | 0                 | 2 (1%)                      | 0                                  | 2 (<1%)          |
| SELENIUM                             | 0                           | 0                 | 1 (<1%)                     | 1 (<1%)                            | 2 (<1%)          |
| SODIUM BICARBONATE                   | 0                           | 0                 | 0                           | 2 (1%)                             | 2 (<1%)          |
| SODIUM CHLORIDE                      | 0                           | 1 (1%)            | 0                           | 1 (<1%)                            | 2 (<1%)          |
| VITAMIN B SUBSTANCES NOS             | 0                           | 0                 | 1 (<1%)                     | 1 (<1%)                            | 2 (<1%)          |
| ANBESOL (NOS)                        | 0                           | 0                 | 0                           | 1 (<1%)                            | 1 (<1%)          |

Note: A medication may be included in more than one ATC Level category and appear more than once.

Note: The following ingredient terms, which do not have an associated ATC Level 1 term, were also taken during Run-in with the following frequencies: Bovine Prostate: SAL 50mcg-1 subject, <1%, Capsicum Annuum: SAL 50mcg-1 subject, <1%, Dextroamphetamine Saccharate: Placebo-1 subject, 1%, Lactoperoxidase: Placebo-1 subject, 1%, and Zinc Arginate: SAL 50mcg-1 subject, <1%.

dln73797: /arenv/arprod/ccil18781\_gr33343/asq112989/final/drivers/cm\_t004\_noncopddurri.sas 24AUG2010 15:26

108

CONFIDENTIAL

ASQ112989



Protocol: ASQ112989  
Population: Run-in

Page 7 of 23

Table 1.23  
Summary of Non-COPD Medications Taken During the Run-in

| ATC Level 1<br>Ingredient               | Run-in<br>Failure<br>(N=52) | Placebo<br>(N=75) | SAL 50mcg<br>BID<br>(N=152) | FSC<br>250/50mcg<br>BID<br>(N=139) | Total<br>(N=418) |
|-----------------------------------------|-----------------------------|-------------------|-----------------------------|------------------------------------|------------------|
| ATROPINE SULFATE                        | 0                           | 0                 | 1 (<1%)                     | 0                                  | 1 (<1%)          |
| BIOTIN                                  | 0                           | 0                 | 0                           | 1 (<1%)                            | 1 (<1%)          |
| BISMUTH SUBSALICYLATE                   | 0                           | 0                 | 0                           | 1 (<1%)                            | 1 (<1%)          |
| BUDESONIDE                              | 1 (2%)                      | 0                 | 0                           | 0                                  | 1 (<1%)          |
| CHOLINE BITARTRATE                      | 0                           | 0                 | 0                           | 1 (<1%)                            | 1 (<1%)          |
| CITRIC ACID                             | 0                           | 0                 | 0                           | 1 (<1%)                            | 1 (<1%)          |
| DEXAMFETAMINE SULFATE                   | 0                           | 1 (1%)            | 0                           | 0                                  | 1 (<1%)          |
| DICYCLOVERINE HYDROCHLORIDE             | 0                           | 0                 | 0                           | 1 (<1%)                            | 1 (<1%)          |
| DIHYDROXYALUMINUM SODIUM<br>CARBONATE   | 0                           | 0                 | 1 (<1%)                     | 0                                  | 1 (<1%)          |
| DOCUSATE                                | 0                           | 0                 | 0                           | 1 (<1%)                            | 1 (<1%)          |
| DULCOLAX (NOS)                          | 0                           | 1 (1%)            | 0                           | 0                                  | 1 (<1%)          |
| ESOMEPRAZOLE                            | 0                           | 1 (1%)            | 0                           | 0                                  | 1 (<1%)          |
| HYOSCINE HYDROBROMIDE                   | 0                           | 0                 | 1 (<1%)                     | 0                                  | 1 (<1%)          |
| INSULIN ISOPHANE, HUMAN<br>BIOSYNTHETIC | 1 (2%)                      | 0                 | 0                           | 0                                  | 1 (<1%)          |
| INSULIN LISPRO                          | 0                           | 0                 | 1 (<1%)                     | 0                                  | 1 (<1%)          |
| ISOPHANE INSULIN                        | 0                           | 0                 | 0                           | 1 (<1%)                            | 1 (<1%)          |
| LAXATIVES, NOS                          | 0                           | 1 (1%)            | 0                           | 0                                  | 1 (<1%)          |
| LOPERAMIDE                              | 0                           | 0                 | 1 (<1%)                     | 0                                  | 1 (<1%)          |
| MACROGOL                                | 0                           | 0                 | 0                           | 1 (<1%)                            | 1 (<1%)          |
| MAGNESIUM                               | 0                           | 0                 | 0                           | 1 (<1%)                            | 1 (<1%)          |
| MAGNESIUM GLUCONATE                     | 0                           | 0                 | 0                           | 1 (<1%)                            | 1 (<1%)          |
| MAGNESIUM HYDROXIDE                     | 1 (2%)                      | 0                 | 0                           | 0                                  | 1 (<1%)          |
| MECLOZINE                               | 0                           | 0                 | 1 (<1%)                     | 0                                  | 1 (<1%)          |
| METOCLOPRAMIDE HYDROCHLORIDE            | 0                           | 1 (1%)            | 0                           | 0                                  | 1 (<1%)          |

Note: A medication may be included in more than one ATC Level category and appear more than once.

Note: The following ingredient terms, which do not have an associated ATC Level 1 term, were also taken during Run-in with the following frequencies: Bovine Prostate: SAL 50mcg-1 subject, <1%, Capsicum Annuum: SAL 50mcg-1 subject, <1%, Dextroamphetamine Saccharate: Placebo-1 subject, 1%, Lactoperoxidase: Placebo-1 subject, 1%, and Zinc Arginate: SAL 50mcg-1 subject, <1%.

dln73797: /arenv/arprod/ccil18781\_gr33343/asq112989/final/drivers/cm\_t004\_noncopddurri.sas 24AUG2010 15:26

109

CONFIDENTIAL

ASQ112989

Protocol: ASQ112989  
Population: Run-in

Page 8 of 23

Table 1.23  
Summary of Non-COPD Medications Taken During the Run-in

| ATC Level 1<br>Ingredient | Run-in<br>Failure<br>(N=52) | Placebo<br>(N=75) | SAL 50mcg<br>BID<br>(N=152) | FSC<br>250/50mcg<br>BID<br>(N=139) | Total<br>(N=418) |
|---------------------------|-----------------------------|-------------------|-----------------------------|------------------------------------|------------------|
| NEOMYCIN                  | 1 (2%)                      | 0                 | 0                           | 0                                  | 1 (<1%)          |
| NYSTATIN                  | 1 (2%)                      | 0                 | 0                           | 0                                  | 1 (<1%)          |
| ONDANSETRON               | 1 (2%)                      | 0                 | 0                           | 0                                  | 1 (<1%)          |
| PANTOTHENIC ACID          | 0                           | 0                 | 1 (<1%)                     | 0                                  | 1 (<1%)          |
| POLYMYXIN B               | 1 (2%)                      | 0                 | 0                           | 0                                  | 1 (<1%)          |
| POTASSIUM GLUCONATE       | 0                           | 0                 | 1 (<1%)                     | 0                                  | 1 (<1%)          |
| PROMETHAZINE              | 0                           | 1 (1%)            | 0                           | 0                                  | 1 (<1%)          |
| PYRIDOXINE                | 0                           | 0                 | 1 (<1%)                     | 0                                  | 1 (<1%)          |
| REPAGLINIDE               | 0                           | 0                 | 0                           | 1 (<1%)                            | 1 (<1%)          |
| ROSIGLITAZONE             | 0                           | 0                 | 0                           | 1 (<1%)                            | 1 (<1%)          |
| SILYBUM MARIANUM          | 0                           | 0                 | 0                           | 1 (<1%)                            | 1 (<1%)          |
| SUCRALFATE                | 0                           | 0                 | 0                           | 1 (<1%)                            | 1 (<1%)          |
| VITAMIN B NOS             | 0                           | 0                 | 1 (<1%)                     | 0                                  | 1 (<1%)          |
| ZEA MAYS                  | 0                           | 0                 | 1 (<1%)                     | 0                                  | 1 (<1%)          |
| CARDIOVASCULAR SYSTEM     |                             |                   |                             |                                    |                  |
| Any medication            | 31 (60%)                    | 47 (63%)          | 93 (61%)                    | 86 (62%)                           | 257 (61%)        |
| LISINOPRIL                | 4 (8%)                      | 13 (17%)          | 24 (16%)                    | 29 (21%)                           | 70 (17%)         |
| HYDROCHLOROTHIAZIDE       | 5 (10%)                     | 7 (9%)            | 23 (15%)                    | 22 (16%)                           | 57 (14%)         |
| SIMVASTATIN               | 6 (12%)                     | 12 (16%)          | 21 (14%)                    | 14 (10%)                           | 53 (13%)         |
| AMLODIPINE BESILATE       | 2 (4%)                      | 4 (5%)            | 9 (6%)                      | 9 (6%)                             | 24 (6%)          |
| ATORVASTATIN CALCIUM      | 4 (8%)                      | 2 (3%)            | 8 (5%)                      | 9 (6%)                             | 23 (6%)          |
| METOPROLOL                | 4 (8%)                      | 3 (4%)            | 10 (7%)                     | 5 (4%)                             | 22 (5%)          |
| AMLODIPINE                | 2 (4%)                      | 3 (4%)            | 9 (6%)                      | 7 (5%)                             | 21 (5%)          |
| FUROSEMIDE                | 6 (12%)                     | 3 (4%)            | 8 (5%)                      | 4 (3%)                             | 21 (5%)          |
| CARVEDILOL                | 3 (6%)                      | 2 (3%)            | 5 (3%)                      | 10 (7%)                            | 20 (5%)          |

Note: A medication may be included in more than one ATC Level category and appear more than once.

Note: The following ingredient terms, which do not have an associated ATC Level 1 term, were also taken during Run-in with the following frequencies: Bovine Prostate: SAL 50mcg-1 subject, <1%, Capsicum Annuum: SAL 50mcg-1 subject, <1%, Dextroamphetamine Saccharate: Placebo-1 subject, 1%, Lactoperoxidase: Placebo-1 subject, 1%, and Zinc Arginate: SAL 50mcg-1 subject, <1%.

dln73797: /arenv/arprod/ccil18781\_gr33343/asq112989/final/drivers/cm\_t004\_noncopddurri.sas 24AUG2010 15:26

110

CONFIDENTIAL

ASQ112989

Protocol: ASQ112989  
Population: Run-in

Page 9 of 23

Table 1.23  
Summary of Non-COPD Medications Taken During the Run-in

| ATC Level 1<br>Ingredient    | Run-in<br>Failure<br>(N=52) | Placebo<br>(N=75) | SAL 50mcg<br>BID<br>(N=152) | FSC<br>250/50mcg<br>BID<br>(N=139) | Total<br>(N=418) |
|------------------------------|-----------------------------|-------------------|-----------------------------|------------------------------------|------------------|
| FISH OIL                     | 3 (6%)                      | 3 (4%)            | 7 (5%)                      | 7 (5%)                             | 20 (5%)          |
| VALSARTAN                    | 4 (8%)                      | 1 (1%)            | 8 (5%)                      | 7 (5%)                             | 20 (5%)          |
| ATENOLOL                     | 0                           | 6 (8%)            | 8 (5%)                      | 4 (3%)                             | 18 (4%)          |
| PRAVASTATIN                  | 3 (6%)                      | 5 (7%)            | 6 (4%)                      | 4 (3%)                             | 18 (4%)          |
| OLMESARTAN                   | 0                           | 2 (3%)            | 9 (6%)                      | 1 (<1%)                            | 12 (3%)          |
| ROSUVASTATIN CALCIUM         | 2 (4%)                      | 1 (1%)            | 4 (3%)                      | 5 (4%)                             | 12 (3%)          |
| LOVASTATIN                   | 1 (2%)                      | 2 (3%)            | 2 (1%)                      | 6 (4%)                             | 11 (3%)          |
| CLONIDINE                    | 0                           | 0                 | 4 (3%)                      | 5 (4%)                             | 9 (2%)           |
| DIGOXIN                      | 2 (4%)                      | 1 (1%)            | 4 (3%)                      | 1 (<1%)                            | 8 (2%)           |
| EZETIMIBE                    | 1 (2%)                      | 2 (3%)            | 4 (3%)                      | 1 (<1%)                            | 8 (2%)           |
| FENOFIBRATE                  | 0                           | 0                 | 4 (3%)                      | 4 (3%)                             | 8 (2%)           |
| GEMFIBROZIL                  | 2 (4%)                      | 1 (1%)            | 2 (1%)                      | 3 (2%)                             | 8 (2%)           |
| TRIAMTERENE                  | 1 (2%)                      | 2 (3%)            | 2 (1%)                      | 3 (2%)                             | 8 (2%)           |
| ENALAPRIL                    | 2 (4%)                      | 0                 | 2 (1%)                      | 3 (2%)                             | 7 (2%)           |
| GLYCERYL TRINITRATE          | 0                           | 1 (1%)            | 4 (3%)                      | 1 (<1%)                            | 6 (1%)           |
| OMEGA-3 MARINE TRIGLYCERIDES | 0                           | 3 (4%)            | 2 (1%)                      | 1 (<1%)                            | 6 (1%)           |
| DILTIAZEM                    | 1 (2%)                      | 0                 | 4 (3%)                      | 0                                  | 5 (1%)           |
| DILTIAZEM HYDROCHLORIDE      | 1 (2%)                      | 0                 | 0                           | 4 (3%)                             | 5 (1%)           |
| METOPROLOL TARTRATE          | 1 (2%)                      | 0                 | 0                           | 4 (3%)                             | 5 (1%)           |
| NEBIVOLOL HYDROCHLORIDE      | 1 (2%)                      | 1 (1%)            | 1 (<1%)                     | 2 (1%)                             | 5 (1%)           |
| NICOTINIC ACID               | 0                           | 0                 | 2 (1%)                      | 3 (2%)                             | 5 (1%)           |
| UBIDECARENONE                | 0                           | 1 (1%)            | 2 (1%)                      | 2 (1%)                             | 5 (1%)           |
| VERAPAMIL                    | 1 (2%)                      | 0                 | 4 (3%)                      | 0                                  | 5 (1%)           |
| BENAZEPRIL                   | 0                           | 0                 | 3 (2%)                      | 1 (<1%)                            | 4 (<1%)          |
| IRBESARTAN                   | 0                           | 0                 | 3 (2%)                      | 1 (<1%)                            | 4 (<1%)          |
| METOPROLOL SUCCINATE         | 0                           | 2 (3%)            | 0                           | 2 (1%)                             | 4 (<1%)          |

Note: A medication may be included in more than one ATC Level category and appear more than once.

Note: The following ingredient terms, which do not have an associated ATC Level 1 term, were also taken during Run-in with the following frequencies: Bovine Prostate: SAL 50mcg-1 subject, <1%, Capsicum Annuum: SAL 50mcg-1 subject, <1%, Dextroamphetamine Saccharate: Placebo-1 subject, 1%, Lactoperoxidase: Placebo-1 subject, 1%, and Zinc Arginate: SAL 50mcg-1 subject, <1%.

dln73797: /arenv/arprod/ccil18781\_gr33343/asq112989/final/drivers/cm\_t004\_noncopddurri.sas 24AUG2010 15:26

111

CONFIDENTIAL

ASQ112989

Protocol: ASQ112989  
Population: Run-in

Page 10 of 23

Table 1.23  
Summary of Non-COPD Medications Taken During the Run-in

| ATC Level 1<br>Ingredient   | Run-in<br>Failure<br>(N=52) | Placebo<br>(N=75) | SAL 50mcg<br>BID<br>(N=152) | FSC<br>250/50mcg<br>BID<br>(N=139) | Total<br>(N=418) |
|-----------------------------|-----------------------------|-------------------|-----------------------------|------------------------------------|------------------|
| TERAZOSIN                   | 0                           | 2 (3%)            | 1 (<1%)                     | 1 (<1%)                            | 4 (<1%)          |
| TORASEMIDE                  | 1 (2%)                      | 0                 | 2 (1%)                      | 1 (<1%)                            | 4 (<1%)          |
| DOXAZOSIN MESILATE          | 0                           | 2 (3%)            | 0                           | 1 (<1%)                            | 3 (<1%)          |
| HYDROCORTISONE              | 1 (2%)                      | 0                 | 2 (1%)                      | 0                                  | 3 (<1%)          |
| LOSARTAN POTASSIUM          | 0                           | 1 (1%)            | 0                           | 2 (1%)                             | 3 (<1%)          |
| NIFEDIPINE                  | 0                           | 0                 | 1 (<1%)                     | 2 (1%)                             | 3 (<1%)          |
| BENAZEPRIL HYDROCHLORIDE    | 0                           | 0                 | 1 (<1%)                     | 1 (<1%)                            | 2 (<1%)          |
| CLONIDINE HYDROCHLORIDE     | 0                           | 0                 | 1 (<1%)                     | 1 (<1%)                            | 2 (<1%)          |
| ISOSORBIDE                  | 1 (2%)                      | 1 (1%)            | 0                           | 0                                  | 2 (<1%)          |
| LIDOCAINE                   | 0                           | 0                 | 2 (1%)                      | 0                                  | 2 (<1%)          |
| METOLAZONE                  | 0                           | 0                 | 2 (1%)                      | 0                                  | 2 (<1%)          |
| MONASCUS PURPUREUS          | 0                           | 1 (1%)            | 0                           | 1 (<1%)                            | 2 (<1%)          |
| NADOLOL                     | 0                           | 1 (1%)            | 0                           | 1 (<1%)                            | 2 (<1%)          |
| PENTOXIFYLLINE              | 0                           | 2 (3%)            | 0                           | 0                                  | 2 (<1%)          |
| PHENYLEPHRINE HYDROCHLORIDE | 0                           | 0                 | 0                           | 2 (1%)                             | 2 (<1%)          |
| PRAVASTATIN SODIUM          | 1 (2%)                      | 0                 | 1 (<1%)                     | 0                                  | 2 (<1%)          |
| QUINAPRIL                   | 0                           | 1 (1%)            | 0                           | 1 (<1%)                            | 2 (<1%)          |
| TADALAFIL                   | 0                           | 1 (1%)            | 0                           | 1 (<1%)                            | 2 (<1%)          |
| TERAZOSIN HYDROCHLORIDE     | 0                           | 1 (1%)            | 0                           | 1 (<1%)                            | 2 (<1%)          |
| ALDACTONE (NOS)             | 0                           | 0                 | 1 (<1%)                     | 0                                  | 1 (<1%)          |
| ALISKIREN FUMARATE          | 1 (2%)                      | 0                 | 0                           | 0                                  | 1 (<1%)          |
| AMIODARONE                  | 0                           | 0                 | 1 (<1%)                     | 0                                  | 1 (<1%)          |
| BISOPROLOL FUMARATE         | 0                           | 0                 | 0                           | 1 (<1%)                            | 1 (<1%)          |
| BUMETANIDE                  | 0                           | 1 (1%)            | 0                           | 0                                  | 1 (<1%)          |
| CAMPHOR                     | 0                           | 0                 | 0                           | 1 (<1%)                            | 1 (<1%)          |
| DOFETILIDE                  | 0                           | 0                 | 0                           | 1 (<1%)                            | 1 (<1%)          |

Note: A medication may be included in more than one ATC Level category and appear more than once.

Note: The following ingredient terms, which do not have an associated ATC Level 1 term, were also taken during Run-in with the following frequencies: Bovine Prostate: SAL 50mcg-1 subject, <1%, Capsicum Annuum: SAL 50mcg-1 subject, <1%, Dextroamphetamine Saccharate: Placebo-1 subject, 1%, Lactoperoxidase: Placebo-1 subject, 1%, and Zinc Arginate: SAL 50mcg-1 subject, <1%.

dln73797: /arenv/arprod/ccil8781\_gr33343/asq112989/final/drivers/cm\_t004\_noncopddurri.sas 24AUG2010 15:26

112

CONFIDENTIAL

ASQ112989

Protocol: ASQ112989  
Population: Run-in

Page 11 of 23

Table 1.23  
Summary of Non-COPD Medications Taken During the Run-in

| ATC Level 1<br>Ingredient | Run-in<br>Failure<br>(N=52) | Placebo<br>(N=75) | SAL 50mcg<br>BID<br>(N=152) | FSC<br>250/50mcg<br>BID<br>(N=139) | Total<br>(N=418) |
|---------------------------|-----------------------------|-------------------|-----------------------------|------------------------------------|------------------|
| DOXAZOSIN                 | 0                           | 1 (1%)            | 0                           | 0                                  | 1 (<1%)          |
| DRONEDARONE               | 0                           | 0                 | 1 (<1%)                     | 0                                  | 1 (<1%)          |
| ENALAPRIL MALEATE         | 0                           | 1 (1%)            | 0                           | 0                                  | 1 (<1%)          |
| FELODIPINE                | 0                           | 0                 | 0                           | 1 (<1%)                            | 1 (<1%)          |
| FLUVASTATIN SODIUM        | 0                           | 0                 | 1 (<1%)                     | 0                                  | 1 (<1%)          |
| HYDRALAZINE               | 0                           | 0                 | 1 (<1%)                     | 0                                  | 1 (<1%)          |
| HYDRALAZINE HYDROCHLORIDE | 0                           | 0                 | 0                           | 1 (<1%)                            | 1 (<1%)          |
| INDAPAMIDE                | 0                           | 0                 | 0                           | 1 (<1%)                            | 1 (<1%)          |
| INDOMETACIN               | 1 (2%)                      | 0                 | 0                           | 0                                  | 1 (<1%)          |
| ISOSORBIDE DINITRATE      | 1 (2%)                      | 0                 | 0                           | 0                                  | 1 (<1%)          |
| MOEXIPRIL HYDROCHLORIDE   | 0                           | 0                 | 0                           | 1 (<1%)                            | 1 (<1%)          |
| NEBIVOLOL                 | 0                           | 0                 | 1 (<1%)                     | 0                                  | 1 (<1%)          |
| PETROSELINUM CRISPUM      | 0                           | 0                 | 1 (<1%)                     | 0                                  | 1 (<1%)          |
| PHYTOSTEROL (NOS)         | 0                           | 1 (1%)            | 0                           | 0                                  | 1 (<1%)          |
| QUINAPRIL HYDROCHLORIDE   | 0                           | 1 (1%)            | 0                           | 0                                  | 1 (<1%)          |
| RAMIPRIL                  | 1 (2%)                      | 0                 | 0                           | 0                                  | 1 (<1%)          |
| ROSUVASTATIN              | 0                           | 1 (1%)            | 0                           | 0                                  | 1 (<1%)          |
| SILODOSIN                 | 0                           | 1 (1%)            | 0                           | 0                                  | 1 (<1%)          |
| SPIRONOLACTONE            | 0                           | 1 (1%)            | 0                           | 0                                  | 1 (<1%)          |
| TELMISARTAN               | 0                           | 0                 | 0                           | 1 (<1%)                            | 1 (<1%)          |
| TIMOLOL                   | 0                           | 0                 | 1 (<1%)                     | 0                                  | 1 (<1%)          |
| TIMOLOL MALEATE           | 0                           | 1 (1%)            | 0                           | 0                                  | 1 (<1%)          |
| TRANDOLAPRIL              | 0                           | 0                 | 1 (<1%)                     | 0                                  | 1 (<1%)          |
| MUSCULO-SKELETAL SYSTEM   |                             |                   |                             |                                    |                  |
| Any medication            | 27 (52%)                    | 47 (63%)          | 71 (47%)                    | 73 (53%)                           | 218 (52%)        |

Note: A medication may be included in more than one ATC Level category and appear more than once.

Note: The following ingredient terms, which do not have an associated ATC Level 1 term, were also taken during Run-in with the following frequencies: Bovine Prostate: SAL 50mcg-1 subject, <1%, Capsicum Annuum: SAL 50mcg-1 subject, <1%, Dextroamphetamine Saccharate: Placebo-1 subject, 1%, Lactoperoxidase: Placebo-1 subject, 1%, and Zinc Arginate: SAL 50mcg-1 subject, <1%.

dln73797: /arenv/arprod/ccil18781\_gr33343/asq112989/final/drivers/cm\_t004\_noncopddurri.sas 24AUG2010 15:26

113

CONFIDENTIAL

ASQ112989

Protocol: ASQ112989  
Population: Run-in

Page 12 of 23

Table 1.23  
Summary of Non-COPD Medications Taken During the Run-in

| ATC Level 1<br>Ingredient | Run-in<br>Failure<br>(N=52) | Placebo<br>(N=75) | SAL 50mcg<br>BID<br>(N=152) | FSC<br>250/50mcg<br>BID<br>(N=139) | Total<br>(N=418) |
|---------------------------|-----------------------------|-------------------|-----------------------------|------------------------------------|------------------|
| ACETYLSALICYLIC ACID      | 13 (25%)                    | 20 (27%)          | 46 (30%)                    | 49 (35%)                           | 128 (31%)        |
| IBUPROFEN                 | 5 (10%)                     | 9 (12%)           | 19 (13%)                    | 12 (9%)                            | 45 (11%)         |
| NAPROXEN SODIUM           | 1 (2%)                      | 7 (9%)            | 6 (4%)                      | 6 (4%)                             | 20 (5%)          |
| ALENDRONATE SODIUM        | 1 (2%)                      | 4 (5%)            | 4 (3%)                      | 3 (2%)                             | 12 (3%)          |
| NAPROXEN                  | 1 (2%)                      | 3 (4%)            | 4 (3%)                      | 4 (3%)                             | 12 (3%)          |
| MELOXICAM                 | 0                           | 5 (7%)            | 1 (<1%)                     | 3 (2%)                             | 9 (2%)           |
| CHONDROITIN               | 0                           | 1 (1%)            | 2 (1%)                      | 2 (1%)                             | 5 (1%)           |
| CYCLOBENZAPRINE           | 1 (2%)                      | 1 (1%)            | 0                           | 3 (2%)                             | 5 (1%)           |
| HYDROCHLORIDE             |                             |                   |                             |                                    |                  |
| GLUCOSAMINE               | 1 (2%)                      | 1 (1%)            | 2 (1%)                      | 1 (<1%)                            | 5 (1%)           |
| RISEDRONATE SODIUM        | 2 (4%)                      | 0                 | 0                           | 3 (2%)                             | 5 (1%)           |
| ALLOPURINOL               | 0                           | 0                 | 3 (2%)                      | 1 (<1%)                            | 4 (<1%)          |
| CELECOXIB                 | 0                           | 1 (1%)            | 1 (<1%)                     | 2 (1%)                             | 4 (<1%)          |
| CARISOPRODOL              | 0                           | 1 (1%)            | 1 (<1%)                     | 1 (<1%)                            | 3 (<1%)          |
| COLCHICINE                | 0                           | 1 (1%)            | 1 (<1%)                     | 1 (<1%)                            | 3 (<1%)          |
| DICLOFENAC                | 0                           | 1 (1%)            | 2 (1%)                      | 0                                  | 3 (<1%)          |
| DIMETHYL SULFONE          | 0                           | 0                 | 2 (1%)                      | 1 (<1%)                            | 3 (<1%)          |
| ALENDRONIC ACID           | 0                           | 1 (1%)            | 0                           | 1 (<1%)                            | 2 (<1%)          |
| CAPSAICIN                 | 0                           | 0                 | 0                           | 2 (1%)                             | 2 (<1%)          |
| CYCLOBENZAPRINE           | 0                           | 0                 | 1 (<1%)                     | 1 (<1%)                            | 2 (<1%)          |
| GLUCOSAMINE SULFATE       | 0                           | 0                 | 1 (<1%)                     | 1 (<1%)                            | 2 (<1%)          |
| NABUMETONE                | 0                           | 0                 | 1 (<1%)                     | 1 (<1%)                            | 2 (<1%)          |
| SODIUM IBANDRONATE        | 1 (2%)                      | 0                 | 1 (<1%)                     | 0                                  | 2 (<1%)          |
| ZOLEDRONIC ACID           | 1 (2%)                      | 0                 | 0                           | 1 (<1%)                            | 2 (<1%)          |
| BACLOFEN                  | 0                           | 0                 | 0                           | 1 (<1%)                            | 1 (<1%)          |
| DICLOFENAC SODIUM         | 0                           | 0                 | 1 (<1%)                     | 0                                  | 1 (<1%)          |

Note: A medication may be included in more than one ATC Level category and appear more than once.

Note: The following ingredient terms, which do not have an associated ATC Level 1 term, were also taken during Run-in with the following frequencies: Bovine Prostate: SAL 50mcg-1 subject, <1%, Capsicum Annuum: SAL 50mcg-1 subject, <1%, Dextroamphetamine Saccharate: Placebo-1 subject, 1%, Lactoperoxidase: Placebo-1 subject, 1%, and Zinc Arginate: SAL 50mcg-1 subject, <1%.

dln73797: /arenv/arprod/ccil18781\_gr33343/asq112989/final/drivers/cm\_t004\_noncopddurri.sas 24AUG2010 15:26

114

CONFIDENTIAL

ASQ112989

Protocol: ASQ112989  
Population: Run-in

Page 13 of 23

Table 1.23  
Summary of Non-COPD Medications Taken During the Run-in

| ATC Level 1<br>Ingredient             | Run-in<br>Failure<br>(N=52) | Placebo<br>(N=75) | SAL 50mcg<br>BID<br>(N=152) | FSC<br>250/50mcg<br>BID<br>(N=139) | Total<br>(N=418) |
|---------------------------------------|-----------------------------|-------------------|-----------------------------|------------------------------------|------------------|
| ETODOLAC                              | 1 (2%)                      | 0                 | 0                           | 0                                  | 1 (<1%)          |
| GLUCOSAMINE HYDROCHLORIDE             | 0                           | 0                 | 1 (<1%)                     | 0                                  | 1 (<1%)          |
| HYALURONIC ACID                       | 0                           | 1 (1%)            | 0                           | 0                                  | 1 (<1%)          |
| INDOMETACIN                           | 1 (2%)                      | 0                 | 0                           | 0                                  | 1 (<1%)          |
| KETOROLAC TROMETAMOL                  | 0                           | 1 (1%)            | 0                           | 0                                  | 1 (<1%)          |
| LEVOMENTHOL                           | 0                           | 0                 | 0                           | 1 (<1%)                            | 1 (<1%)          |
| METAXALONE                            | 0                           | 1 (1%)            | 0                           | 0                                  | 1 (<1%)          |
| OXAPROZIN                             | 1 (2%)                      | 0                 | 0                           | 0                                  | 1 (<1%)          |
| PIROXICAM                             | 0                           | 0                 | 1 (<1%)                     | 0                                  | 1 (<1%)          |
| TIZANIDINE HYDROCHLORIDE              | 0                           | 0                 | 0                           | 1 (<1%)                            | 1 (<1%)          |
| <b>BLOOD AND BLOOD FORMING ORGANS</b> |                             |                   |                             |                                    |                  |
| Any medication                        | 20 (38%)                    | 26 (35%)          | 59 (39%)                    | 62 (45%)                           | 167 (40%)        |
| ACETYLSALICYLIC ACID                  | 13 (25%)                    | 20 (27%)          | 46 (30%)                    | 49 (35%)                           | 128 (31%)        |
| CLOPIDOGREL BISULFATE                 | 4 (8%)                      | 3 (4%)            | 7 (5%)                      | 6 (4%)                             | 20 (5%)          |
| CYANOCOBALAMIN                        | 2 (4%)                      | 3 (4%)            | 8 (5%)                      | 4 (3%)                             | 17 (4%)          |
| POTASSIUM CHLORIDE                    | 0                           | 3 (4%)            | 4 (3%)                      | 6 (4%)                             | 13 (3%)          |
| FOLIC ACID                            | 0                           | 1 (1%)            | 3 (2%)                      | 2 (1%)                             | 6 (1%)           |
| POTASSIUM NOS                         | 1 (2%)                      | 0                 | 3 (2%)                      | 2 (1%)                             | 6 (1%)           |
| WARFARIN SODIUM                       | 2 (4%)                      | 0                 | 2 (1%)                      | 2 (1%)                             | 6 (1%)           |
| FERROUS SULPHATE                      | 0                           | 1 (1%)            | 0                           | 4 (3%)                             | 5 (1%)           |
| DIPYRIDAMOLE                          | 0                           | 2 (3%)            | 1 (<1%)                     | 0                                  | 3 (<1%)          |
| WARFARIN                              | 0                           | 0                 | 2 (1%)                      | 1 (<1%)                            | 3 (<1%)          |
| SODIUM BICARBONATE                    | 0                           | 0                 | 0                           | 2 (1%)                             | 2 (<1%)          |
| SODIUM CHLORIDE                       | 0                           | 1 (1%)            | 0                           | 1 (<1%)                            | 2 (<1%)          |
| CILOSTAZOL                            | 0                           | 0                 | 0                           | 1 (<1%)                            | 1 (<1%)          |

Note: A medication may be included in more than one ATC Level category and appear more than once.

Note: The following ingredient terms, which do not have an associated ATC Level 1 term, were also taken during Run-in with the following frequencies: Bovine Prostate: SAL 50mcg-1 subject, <1%, Capsicum Annuum: SAL 50mcg-1 subject, <1%, Dextroamphetamine Saccharate: Placebo-1 subject, 1%, Lactoperoxidase: Placebo-1 subject, 1%, and Zinc Arginate: SAL 50mcg-1 subject, <1%.

dln73797: /arenv/arprod/ccil18781\_gr33343/asq112989/final/drivers/cm\_t004\_noncopddurri.sas 24AUG2010 15:26

115

CONFIDENTIAL

ASQ112989

Protocol: ASQ112989  
Population: Run-in

Page 14 of 23

Table 1.23  
Summary of Non-COPD Medications Taken During the Run-in

| ATC Level 1<br>Ingredient                 | Run-in<br>Failure<br>(N=52) | Placebo<br>(N=75) | SAL 50mcg<br>BID<br>(N=152) | FSC<br>250/50mcg<br>BID<br>(N=139) | Total<br>(N=418) |
|-------------------------------------------|-----------------------------|-------------------|-----------------------------|------------------------------------|------------------|
| ELECTROLYTES NOS                          | 0                           | 0                 | 0                           | 1 (<1%)                            | 1 (<1%)          |
| FERROUS GLUCONATE                         | 0                           | 0                 | 0                           | 1 (<1%)                            | 1 (<1%)          |
| GLUCOSE OXIDASE                           | 0                           | 1 (1%)            | 0                           | 0                                  | 1 (<1%)          |
| IRON                                      | 0                           | 0                 | 1 (<1%)                     | 0                                  | 1 (<1%)          |
| NEOMYCIN                                  | 1 (2%)                      | 0                 | 0                           | 0                                  | 1 (<1%)          |
| GENITO URINARY SYSTEM AND SEX<br>HORMONES |                             |                   |                             |                                    |                  |
| Any medication                            | 14 (27%)                    | 23 (31%)          | 41 (27%)                    | 37 (27%)                           | 115 (28%)        |
| IBUPROFEN                                 | 5 (10%)                     | 9 (12%)           | 19 (13%)                    | 12 (9%)                            | 45 (11%)         |
| NAPROXEN SODIUM                           | 1 (2%)                      | 7 (9%)            | 6 (4%)                      | 6 (4%)                             | 20 (5%)          |
| NAPROXEN                                  | 1 (2%)                      | 3 (4%)            | 4 (3%)                      | 4 (3%)                             | 12 (3%)          |
| ESTRADIOL                                 | 1 (2%)                      | 1 (1%)            | 2 (1%)                      | 1 (<1%)                            | 5 (1%)           |
| TAMSULOSIN HYDROCHLORIDE                  | 0                           | 1 (1%)            | 1 (<1%)                     | 3 (2%)                             | 5 (1%)           |
| TERAZOSIN                                 | 0                           | 2 (3%)            | 1 (<1%)                     | 1 (<1%)                            | 4 (<1%)          |
| DIMETHYL SULFONE                          | 0                           | 0                 | 2 (1%)                      | 1 (<1%)                            | 3 (<1%)          |
| DOXAZOSIN MESILATE                        | 0                           | 2 (3%)            | 0                           | 1 (<1%)                            | 3 (<1%)          |
| DUTASTERIDE                               | 0                           | 0                 | 1 (<1%)                     | 2 (1%)                             | 3 (<1%)          |
| ESTROGENS CONJUGATED                      | 1 (2%)                      | 0                 | 0                           | 2 (1%)                             | 3 (<1%)          |
| FINASTERIDE                               | 0                           | 2 (3%)            | 1 (<1%)                     | 0                                  | 3 (<1%)          |
| SERENOA REPENS                            | 0                           | 0                 | 1 (<1%)                     | 2 (1%)                             | 3 (<1%)          |
| SILDENAFIL CITRATE                        | 1 (2%)                      | 0                 | 2 (1%)                      | 0                                  | 3 (<1%)          |
| TOLTERODINE TARTRATE                      | 0                           | 0                 | 2 (1%)                      | 1 (<1%)                            | 3 (<1%)          |
| ALFUZOSIN HYDROCHLORIDE                   | 0                           | 0                 | 1 (<1%)                     | 1 (<1%)                            | 2 (<1%)          |
| COPPER                                    | 0                           | 0                 | 2 (1%)                      | 0                                  | 2 (<1%)          |
| METRONIDAZOLE                             | 1 (2%)                      | 0                 | 1 (<1%)                     | 0                                  | 2 (<1%)          |

Note: A medication may be included in more than one ATC Level category and appear more than once.

Note: The following ingredient terms, which do not have an associated ATC Level 1 term, were also taken during Run-in with the following frequencies: Bovine Prostate: SAL 50mcg-1 subject, <1%, Capsicum Annuum: SAL 50mcg-1 subject, <1%, Dextroamphetamine Saccharate: Placebo-1 subject, 1%, Lactoperoxidase: Placebo-1 subject, 1%, and Zinc Arginate: SAL 50mcg-1 subject, <1%.

dln73797: /arenv/arprod/ccil8781\_gr33343/asq112989/final/drivers/cm\_t004\_noncopddurri.sas 24AUG2010 15:26

116

CONFIDENTIAL

ASQ112989



Protocol: ASQ112989  
Population: Run-in

Page 15 of 23

Table 1.23  
Summary of Non-COPD Medications Taken During the Run-in

| ATC Level 1<br>Ingredient        | Run-in<br>Failure<br>(N=52) | Placebo<br>(N=75) | SAL 50mcg<br>BID<br>(N=152) | FSC<br>250/50mcg<br>BID<br>(N=139) | Total<br>(N=418) |
|----------------------------------|-----------------------------|-------------------|-----------------------------|------------------------------------|------------------|
| OXYBUTYNIN HYDROCHLORIDE         | 0                           | 0                 | 0                           | 2 (1%)                             | 2 (<1%)          |
| TADALAFIL                        | 0                           | 1 (1%)            | 0                           | 1 (<1%)                            | 2 (<1%)          |
| TAMSULOSIN                       | 1 (2%)                      | 1 (1%)            | 0                           | 0                                  | 2 (<1%)          |
| TERAZOSIN HYDROCHLORIDE          | 0                           | 1 (1%)            | 0                           | 1 (<1%)                            | 2 (<1%)          |
| DOXAZOSIN                        | 0                           | 1 (1%)            | 0                           | 0                                  | 1 (<1%)          |
| KETOCONAZOLE                     | 0                           | 0                 | 0                           | 1 (<1%)                            | 1 (<1%)          |
| MAGNESIUM HYDROXIDE              | 1 (2%)                      | 0                 | 0                           | 0                                  | 1 (<1%)          |
| MEDROXYPROGESTERONE ACETATE      | 1 (2%)                      | 0                 | 0                           | 0                                  | 1 (<1%)          |
| METHYLTHIONINIUM CHLORIDE        | 0                           | 1 (1%)            | 0                           | 0                                  | 1 (<1%)          |
| NORETHISTERONE ACETATE           | 0                           | 0                 | 0                           | 1 (<1%)                            | 1 (<1%)          |
| NYSTATIN                         | 1 (2%)                      | 0                 | 0                           | 0                                  | 1 (<1%)          |
| PHENAZOPYRIDINE<br>HYDROCHLORIDE | 0                           | 0                 | 1 (<1%)                     | 0                                  | 1 (<1%)          |
| PHENYL SALICYLATE                | 0                           | 1 (1%)            | 0                           | 0                                  | 1 (<1%)          |
| RALOXIFENE HYDROCHLORIDE         | 0                           | 1 (1%)            | 0                           | 0                                  | 1 (<1%)          |
| SILODOSIN                        | 0                           | 1 (1%)            | 0                           | 0                                  | 1 (<1%)          |
| SODIUM PHOSPHATE MONOBASIC       | 0                           | 1 (1%)            | 0                           | 0                                  | 1 (<1%)          |
| SOLIFENACIN SUCCINATE            | 0                           | 0                 | 1 (<1%)                     | 0                                  | 1 (<1%)          |
| VARDENAFIL                       | 0                           | 0                 | 0                           | 1 (<1%)                            | 1 (<1%)          |
| RESPIRATORY SYSTEM               |                             |                   |                             |                                    |                  |
| Any medication                   | 16 (31%)                    | 12 (16%)          | 40 (26%)                    | 32 (23%)                           | 100 (24%)        |
| HYDROCODONE BITARTRATE           | 6 (12%)                     | 3 (4%)            | 15 (10%)                    | 10 (7%)                            | 34 (8%)          |
| HYDROCODONE                      | 2 (4%)                      | 2 (3%)            | 6 (4%)                      | 3 (2%)                             | 13 (3%)          |
| GUAIFENESIN                      | 2 (4%)                      | 1 (1%)            | 1 (<1%)                     | 2 (1%)                             | 6 (1%)           |
| CETIRIZINE HYDROCHLORIDE         | 2 (4%)                      | 1 (1%)            | 1 (<1%)                     | 1 (<1%)                            | 5 (1%)           |

Note: A medication may be included in more than one ATC Level category and appear more than once.

Note: The following ingredient terms, which do not have an associated ATC Level 1 term, were also taken during Run-in with the following frequencies: Bovine Prostate: SAL 50mcg-1 subject, <1%, Capsicum Annuum: SAL 50mcg-1 subject, <1%, Dextroamphetamine Saccharate: Placebo-1 subject, 1%, Lactoperoxidase: Placebo-1 subject, 1%, and Zinc Arginate: SAL 50mcg-1 subject, <1%.

dln73797: /arenv/arprod/ccil8781\_gr33343/asq112989/final/drivers/cm\_t004\_noncopddurri.sas 24AUG2010 15:26

117

CONFIDENTIAL

ASQ112989

Protocol: ASQ112989  
Population: Run-in

Page 16 of 23

Table 1.23  
Summary of Non-COPD Medications Taken During the Run-in

| ATC Level 1<br>Ingredient   | Run-in<br>Failure<br>(N=52) | Placebo<br>(N=75) | SAL 50mcg<br>BID<br>(N=152) | FSC<br>250/50mcg<br>BID<br>(N=139) | Total<br>(N=418) |
|-----------------------------|-----------------------------|-------------------|-----------------------------|------------------------------------|------------------|
| DIPHENHYDRAMINE             | 1 (2%)                      | 0                 | 3 (2%)                      | 1 (<1%)                            | 5 (1%)           |
| HYDROCHLORIDE               |                             |                   |                             |                                    |                  |
| BENADRYL (NOS)              | 0                           | 0                 | 1 (<1%)                     | 3 (2%)                             | 4 (<1%)          |
| DIPHENHYDRAMINE             | 0                           | 1 (1%)            | 1 (<1%)                     | 2 (1%)                             | 4 (<1%)          |
| CETIRIZINE                  | 1 (2%)                      | 0                 | 1 (<1%)                     | 1 (<1%)                            | 3 (<1%)          |
| CHLORPHENAMINE MALEATE      | 0                           | 1 (1%)            | 1 (<1%)                     | 1 (<1%)                            | 3 (<1%)          |
| DEXTROMETHORPHAN            | 1 (2%)                      | 1 (1%)            | 0                           | 1 (<1%)                            | 3 (<1%)          |
| HYDROBROMIDE                |                             |                   |                             |                                    |                  |
| DOXYLAMINE SUCCINATE        | 1 (2%)                      | 1 (1%)            | 0                           | 1 (<1%)                            | 3 (<1%)          |
| FLUTICASONE PROPIONATE      | 1 (2%)                      | 0                 | 1 (<1%)                     | 1 (<1%)                            | 3 (<1%)          |
| PSEUDOEPHEDRINE             | 0                           | 2 (3%)            | 0                           | 1 (<1%)                            | 3 (<1%)          |
| HYDROCHLORIDE               |                             |                   |                             |                                    |                  |
| FEXOFENADINE                | 0                           | 1 (1%)            | 0                           | 1 (<1%)                            | 2 (<1%)          |
| FEXOFENADINE HYDROCHLORIDE  | 0                           | 0                 | 2 (1%)                      | 0                                  | 2 (<1%)          |
| LIDOCAINE                   | 0                           | 0                 | 2 (1%)                      | 0                                  | 2 (<1%)          |
| LORATADINE                  | 0                           | 1 (1%)            | 1 (<1%)                     | 0                                  | 2 (<1%)          |
| MOMETASONE FUROATE          | 2 (4%)                      | 0                 | 0                           | 0                                  | 2 (<1%)          |
| PHENYLEPHRINE HYDROCHLORIDE | 0                           | 0                 | 0                           | 2 (1%)                             | 2 (<1%)          |
| RETINOL                     | 1 (2%)                      | 0                 | 1 (<1%)                     | 0                                  | 2 (<1%)          |
| SODIUM CHLORIDE             | 0                           | 1 (1%)            | 0                           | 1 (<1%)                            | 2 (<1%)          |
| SUDAFED (NOS)               | 1 (2%)                      | 0                 | 1 (<1%)                     | 0                                  | 2 (<1%)          |
| ACETYLCYSTEINE              | 0                           | 0                 | 1 (<1%)                     | 0                                  | 1 (<1%)          |
| ATROPINE SULFATE            | 0                           | 0                 | 1 (<1%)                     | 0                                  | 1 (<1%)          |
| BENZONATATE                 | 0                           | 0                 | 0                           | 1 (<1%)                            | 1 (<1%)          |
| BUDESONIDE                  | 1 (2%)                      | 0                 | 0                           | 0                                  | 1 (<1%)          |
| CHLORPHENAMINE              | 0                           | 0                 | 0                           | 1 (<1%)                            | 1 (<1%)          |

Note: A medication may be included in more than one ATC Level category and appear more than once.

Note: The following ingredient terms, which do not have an associated ATC Level 1 term, were also taken during Run-in with the following frequencies: Bovine Prostate: SAL 50mcg-1 subject, <1%, Capsicum Annuum: SAL 50mcg-1 subject, <1%, Dextroamphetamine Saccharate: Placebo-1 subject, 1%, Lactoperoxidase: Placebo-1 subject, 1%, and Zinc Arginate: SAL 50mcg-1 subject, <1%.

dln73797: /arenv/arprod/ccil8781\_gr33343/asq112989/final/drivers/cm\_t004\_noncopddurri.sas 24AUG2010 15:26

118

CONFIDENTIAL

ASQ112989

Protocol: ASQ112989  
Population: Run-in

Page 17 of 23

Table 1.23  
Summary of Non-COPD Medications Taken During the Run-in

| ATC Level 1<br>Ingredient         | Run-in<br>Failure<br>(N=52) | Placebo<br>(N=75) | SAL 50mcg<br>BID<br>(N=152) | FSC<br>250/50mcg<br>BID<br>(N=139) | Total<br>(N=418) |
|-----------------------------------|-----------------------------|-------------------|-----------------------------|------------------------------------|------------------|
| COCAINE                           | 0                           | 0                 | 0                           | 1 (<1%)                            | 1 (<1%)          |
| CODEINE                           | 0                           | 0                 | 0                           | 1 (<1%)                            | 1 (<1%)          |
| DESLORATADINE                     | 0                           | 0                 | 0                           | 1 (<1%)                            | 1 (<1%)          |
| DIPHENHYDRAMINE CITRATE           | 0                           | 0                 | 1 (<1%)                     | 0                                  | 1 (<1%)          |
| LEVOCETIRIZINE HYDROCHLORIDE      | 0                           | 0                 | 1 (<1%)                     | 0                                  | 1 (<1%)          |
| LEVOMENTHOL                       | 0                           | 0                 | 0                           | 1 (<1%)                            | 1 (<1%)          |
| MECLOZINE                         | 0                           | 0                 | 1 (<1%)                     | 0                                  | 1 (<1%)          |
| MONTELUKAST SODIUM                | 0                           | 0                 | 1 (<1%)                     | 0                                  | 1 (<1%)          |
| NEOMYCIN                          | 1 (2%)                      | 0                 | 0                           | 0                                  | 1 (<1%)          |
| OXYGEN                            | 0                           | 0                 | 0                           | 1 (<1%)                            | 1 (<1%)          |
| OXYMETAZOLINE HYDROCHLORIDE       | 0                           | 0                 | 1 (<1%)                     | 0                                  | 1 (<1%)          |
| PHENYLPROPANOLAMINE<br>BITARTRATE | 0                           | 0                 | 0                           | 1 (<1%)                            | 1 (<1%)          |
| PROMETHAZINE                      | 0                           | 1 (1%)            | 0                           | 0                                  | 1 (<1%)          |
| PSEUDOEPHEDRINE                   | 0                           | 0                 | 0                           | 1 (<1%)                            | 1 (<1%)          |
| SALBUTAMOL                        | 0                           | 0                 | 1 (<1%)                     | 0                                  | 1 (<1%)          |
| TYLENOL COLD NOS                  | 0                           | 0                 | 1 (<1%)                     | 0                                  | 1 (<1%)          |
| DERMATOLOGICALS                   |                             |                   |                             |                                    |                  |
| Any medication                    | 10 (19%)                    | 10 (13%)          | 20 (13%)                    | 15 (11%)                           | 55 (13%)         |
| TOCOPHEROL                        | 3 (6%)                      | 2 (3%)            | 4 (3%)                      | 2 (1%)                             | 11 (3%)          |
| GLYCERYL TRINITRATE               | 0                           | 1 (1%)            | 4 (3%)                      | 1 (<1%)                            | 6 (1%)           |
| DIPHENHYDRAMINE<br>HYDROCHLORIDE  | 1 (2%)                      | 0                 | 3 (2%)                      | 1 (<1%)                            | 5 (1%)           |
| BENADRYL (NOS)                    | 0                           | 0                 | 1 (<1%)                     | 3 (2%)                             | 4 (<1%)          |
| DIPHENHYDRAMINE                   | 0                           | 1 (1%)            | 1 (<1%)                     | 2 (1%)                             | 4 (<1%)          |

Note: A medication may be included in more than one ATC Level category and appear more than once.

Note: The following ingredient terms, which do not have an associated ATC Level 1 term, were also taken during Run-in with the following frequencies: Bovine Prostate: SAL 50mcg-1 subject, <1%, Capsicum Annuum: SAL 50mcg-1 subject, <1%, Dextroamphetamine Saccharate: Placebo-1 subject, 1%, Lactoperoxidase: Placebo-1 subject, 1%, and Zinc Arginate: SAL 50mcg-1 subject, <1%.

dln73797: /arenv/arprod/ccil8781\_gr33343/asq112989/final/drivers/cm\_t004\_noncopddurri.sas 24AUG2010 15:26

119

CONFIDENTIAL

ASQ112989

Protocol: ASQ112989  
Population: Run-in

Page 18 of 23

Table 1.23  
Summary of Non-COPD Medications Taken During the Run-in

| ATC Level 1<br>Ingredient | Run-in<br>Failure<br>(N=52) | Placebo<br>(N=75) | SAL 50mcg<br>BID<br>(N=152) | FSC<br>250/50mcg<br>BID<br>(N=139) | Total<br>(N=418) |
|---------------------------|-----------------------------|-------------------|-----------------------------|------------------------------------|------------------|
| FINASTERIDE               | 0                           | 2 (3%)            | 1 (<1%)                     | 0                                  | 3 (<1%)          |
| FLUTICASONE PROPIONATE    | 1 (2%)                      | 0                 | 1 (<1%)                     | 1 (<1%)                            | 3 (<1%)          |
| HYDROCORTISONE            | 1 (2%)                      | 0                 | 2 (1%)                      | 0                                  | 3 (<1%)          |
| ACYCLOVIR                 | 0                           | 0                 | 1 (<1%)                     | 1 (<1%)                            | 2 (<1%)          |
| BETACAROTENE              | 0                           | 0                 | 2 (1%)                      | 0                                  | 2 (<1%)          |
| LIDOCAINE                 | 0                           | 0                 | 2 (1%)                      | 0                                  | 2 (<1%)          |
| METRONIDAZOLE             | 1 (2%)                      | 0                 | 1 (<1%)                     | 0                                  | 2 (<1%)          |
| MOMETASONE FUROATE        | 2 (4%)                      | 0                 | 0                           | 0                                  | 2 (<1%)          |
| RETINOL                   | 1 (2%)                      | 0                 | 1 (<1%)                     | 0                                  | 2 (<1%)          |
| SELENIUM                  | 0                           | 0                 | 1 (<1%)                     | 1 (<1%)                            | 2 (<1%)          |
| ZINC OXIDE                | 0                           | 0                 | 2 (1%)                      | 0                                  | 2 (<1%)          |
| AMINO BENZOIC ACID        | 0                           | 0                 | 0                           | 1 (<1%)                            | 1 (<1%)          |
| BUDESONIDE                | 1 (2%)                      | 0                 | 0                           | 0                                  | 1 (<1%)          |
| CAMPHOR                   | 0                           | 0                 | 0                           | 1 (<1%)                            | 1 (<1%)          |
| COCAINE                   | 0                           | 0                 | 0                           | 1 (<1%)                            | 1 (<1%)          |
| DIPHENHYDRAMINE CITRATE   | 0                           | 0                 | 1 (<1%)                     | 0                                  | 1 (<1%)          |
| HYALURONIC ACID           | 0                           | 1 (1%)            | 0                           | 0                                  | 1 (<1%)          |
| ISOSORBIDE DINITRATE      | 1 (2%)                      | 0                 | 0                           | 0                                  | 1 (<1%)          |
| KETOCONAZOLE              | 0                           | 0                 | 0                           | 1 (<1%)                            | 1 (<1%)          |
| LEVOMENTHOL               | 0                           | 0                 | 0                           | 1 (<1%)                            | 1 (<1%)          |
| LYSOZYME                  | 0                           | 1 (1%)            | 0                           | 0                                  | 1 (<1%)          |
| NEOMYCIN                  | 1 (2%)                      | 0                 | 0                           | 0                                  | 1 (<1%)          |
| NYSTATIN                  | 1 (2%)                      | 0                 | 0                           | 0                                  | 1 (<1%)          |
| PHENYL SALICYLATE         | 0                           | 1 (1%)            | 0                           | 0                                  | 1 (<1%)          |
| PROMETHAZINE              | 0                           | 1 (1%)            | 0                           | 0                                  | 1 (<1%)          |
| SALICYLIC ACID            | 0                           | 0                 | 0                           | 1 (<1%)                            | 1 (<1%)          |

Note: A medication may be included in more than one ATC Level category and appear more than once.

Note: The following ingredient terms, which do not have an associated ATC Level 1 term, were also taken during Run-in with the following frequencies: Bovine Prostate: SAL 50mcg-1 subject, <1%, Capsicum Annuum: SAL 50mcg-1 subject, <1%, Dextroamphetamine Saccharate: Placebo-1 subject, 1%, Lactoperoxidase: Placebo-1 subject, 1%, and Zinc Arginate: SAL 50mcg-1 subject, <1%.

dln73797: /arenv/arprod/ccil8781\_gr33343/asq112989/final/drivers/cm\_t004\_noncopddurri.sas 24AUG2010 15:26

120

CONFIDENTIAL

ASQ112989

Protocol: ASQ112989  
Population: Run-in

Page 19 of 23

Table 1.23  
Summary of Non-COPD Medications Taken During the Run-in

| ATC Level 1<br>Ingredient   | Run-in<br>Failure<br>(N=52) | Placebo<br>(N=75) | SAL 50mcg<br>BID<br>(N=152) | FSC<br>250/50mcg<br>BID<br>(N=139) | Total<br>(N=418) |
|-----------------------------|-----------------------------|-------------------|-----------------------------|------------------------------------|------------------|
| SENSORY ORGANS              |                             |                   |                             |                                    |                  |
| Any medication              | 5 (10%)                     | 7 (9%)            | 19 (13%)                    | 14 (10%)                           | 45 (11%)         |
| CLONIDINE                   | 0                           | 0                 | 4 (3%)                      | 5 (4%)                             | 9 (2%)           |
| CIPROFLOXACIN               | 0                           | 0                 | 3 (2%)                      | 0                                  | 3 (<1%)          |
| DICLOFENAC                  | 0                           | 1 (1%)            | 2 (1%)                      | 0                                  | 3 (<1%)          |
| HYDROCORTISONE              | 1 (2%)                      | 0                 | 2 (1%)                      | 0                                  | 3 (<1%)          |
| ACYCLOVIR                   | 0                           | 0                 | 1 (<1%)                     | 1 (<1%)                            | 2 (<1%)          |
| BENZYL PENICILLIN           | 0                           | 1 (1%)            | 0                           | 1 (<1%)                            | 2 (<1%)          |
| CLONIDINE HYDROCHLORIDE     | 0                           | 0                 | 1 (<1%)                     | 1 (<1%)                            | 2 (<1%)          |
| ISOSORBIDE                  | 1 (2%)                      | 1 (1%)            | 0                           | 0                                  | 2 (<1%)          |
| LATANOPROST                 | 0                           | 1 (1%)            | 1 (<1%)                     | 0                                  | 2 (<1%)          |
| LIDOCAINE                   | 0                           | 0                 | 2 (1%)                      | 0                                  | 2 (<1%)          |
| PHENYLEPHRINE HYDROCHLORIDE | 0                           | 0                 | 0                           | 2 (1%)                             | 2 (<1%)          |
| RETINOL                     | 1 (2%)                      | 0                 | 1 (<1%)                     | 0                                  | 2 (<1%)          |
| SODIUM CHLORIDE             | 0                           | 1 (1%)            | 0                           | 1 (<1%)                            | 2 (<1%)          |
| ACETYLCYSTEINE              | 0                           | 0                 | 1 (<1%)                     | 0                                  | 1 (<1%)          |
| ATROPINE SULFATE            | 0                           | 0                 | 1 (<1%)                     | 0                                  | 1 (<1%)          |
| BRIMONIDINE TARTRATE        | 0                           | 0                 | 1 (<1%)                     | 0                                  | 1 (<1%)          |
| COCAINE                     | 0                           | 0                 | 0                           | 1 (<1%)                            | 1 (<1%)          |
| CORTISONE                   | 1 (2%)                      | 0                 | 0                           | 0                                  | 1 (<1%)          |
| DICLOFENAC SODIUM           | 0                           | 0                 | 1 (<1%)                     | 0                                  | 1 (<1%)          |
| HYALURONIC ACID             | 0                           | 1 (1%)            | 0                           | 0                                  | 1 (<1%)          |
| HYOSCINE HYDROBROMIDE       | 0                           | 0                 | 1 (<1%)                     | 0                                  | 1 (<1%)          |
| INDOMETACIN                 | 1 (2%)                      | 0                 | 0                           | 0                                  | 1 (<1%)          |
| INTERFERON BETA             | 0                           | 0                 | 0                           | 1 (<1%)                            | 1 (<1%)          |

Note: A medication may be included in more than one ATC Level category and appear more than once.

Note: The following ingredient terms, which do not have an associated ATC Level 1 term, were also taken during Run-in with the following frequencies: Bovine Prostate: SAL 50mcg-1 subject, <1%, Capsicum Annuum: SAL 50mcg-1 subject, <1%, Dextroamphetamine Saccharate: Placebo-1 subject, 1%, Lactoperoxidase: Placebo-1 subject, 1%, and Zinc Arginate: SAL 50mcg-1 subject, <1%.

dln73797: /arenv/arprod/ccil18781\_gr33343/asq112989/final/drivers/cm\_t004\_noncopddurri.sas 24AUG2010 15:26

121

CONFIDENTIAL

ASQ112989

Protocol: ASQ112989  
Population: Run-in

Page 20 of 23

Table 1.23  
Summary of Non-COPD Medications Taken During the Run-in

| ATC Level 1<br>Ingredient                                             | Run-in<br>Failure<br>(N=52) | Placebo<br>(N=75) | SAL 50mcg<br>BID<br>(N=152) | FSC<br>250/50mcg<br>BID<br>(N=139) | Total<br>(N=418) |
|-----------------------------------------------------------------------|-----------------------------|-------------------|-----------------------------|------------------------------------|------------------|
| KETOROLAC TROMETAMOL                                                  | 0                           | 1 (1%)            | 0                           | 0                                  | 1 (<1%)          |
| MACROGOL                                                              | 0                           | 0                 | 0                           | 1 (<1%)                            | 1 (<1%)          |
| OPTIVE (NOS)                                                          | 0                           | 0                 | 0                           | 1 (<1%)                            | 1 (<1%)          |
| OXYMETAZOLINE HYDROCHLORIDE                                           | 0                           | 0                 | 1 (<1%)                     | 0                                  | 1 (<1%)          |
| PIROXICAM                                                             | 0                           | 0                 | 1 (<1%)                     | 0                                  | 1 (<1%)          |
| POLYMYXIN B                                                           | 1 (2%)                      | 0                 | 0                           | 0                                  | 1 (<1%)          |
| SALICYLIC ACID                                                        | 0                           | 0                 | 0                           | 1 (<1%)                            | 1 (<1%)          |
| TIMOLOL                                                               | 0                           | 0                 | 1 (<1%)                     | 0                                  | 1 (<1%)          |
| TIMOLOL MALEATE                                                       | 0                           | 1 (1%)            | 0                           | 0                                  | 1 (<1%)          |
| SYSTEMIC HORMONAL<br>PREPARATIONS, EXCL. SEX<br>HORMONES AND INSULINS |                             |                   |                             |                                    |                  |
| Any medication                                                        | 10 (19%)                    | 5 (7%)            | 15 (10%)                    | 9 (6%)                             | 39 (9%)          |
| LEVOTHYROXINE                                                         | 3 (6%)                      | 1 (1%)            | 8 (5%)                      | 3 (2%)                             | 15 (4%)          |
| LEVOTHYROXINE SODIUM                                                  | 2 (4%)                      | 3 (4%)            | 5 (3%)                      | 5 (4%)                             | 15 (4%)          |
| HYDROCORTISONE                                                        | 1 (2%)                      | 0                 | 2 (1%)                      | 0                                  | 3 (<1%)          |
| PREDNISONE                                                            | 3 (6%)                      | 0                 | 0                           | 0                                  | 3 (<1%)          |
| BUDESONIDE                                                            | 1 (2%)                      | 0                 | 0                           | 0                                  | 1 (<1%)          |
| CALCITONIN, SALMON                                                    | 0                           | 1 (1%)            | 0                           | 0                                  | 1 (<1%)          |
| CORTISONE                                                             | 1 (2%)                      | 0                 | 0                           | 0                                  | 1 (<1%)          |
| MELATONIN                                                             | 0                           | 0                 | 1 (<1%)                     | 0                                  | 1 (<1%)          |
| THIAMAZOLE                                                            | 0                           | 0                 | 0                           | 1 (<1%)                            | 1 (<1%)          |
| ANTIINFECTIVES FOR SYSTEMIC<br>USE                                    |                             |                   |                             |                                    |                  |

Note: A medication may be included in more than one ATC Level category and appear more than once.

Note: The following ingredient terms, which do not have an associated ATC Level 1 term, were also taken during Run-in with the following frequencies: Bovine Prostate: SAL 50mcg-1 subject, <1%, Capsicum Annuum: SAL 50mcg-1 subject, <1%, Dextroamphetamine Saccharate: Placebo-1 subject, 1%, Lactoperoxidase: Placebo-1 subject, 1%, and Zinc Arginate: SAL 50mcg-1 subject, <1%.

dln73797: /arenv/arprod/ccil8781\_gr33343/asq112989/final/drivers/cm\_t004\_noncopddurri.sas 24AUG2010 15:26

CONFIDENTIAL

ASQ112989

Protocol: ASQ112989  
Population: Run-in

Page 21 of 23

Table 1.23  
Summary of Non-COPD Medications Taken During the Run-in

| ATC Level 1<br>Ingredient        | Run-in<br>Failure<br>(N=52) | Placebo<br>(N=75) | SAL 50mcg<br>BID<br>(N=152) | FSC<br>250/50mcg<br>BID<br>(N=139) | Total<br>(N=418) |
|----------------------------------|-----------------------------|-------------------|-----------------------------|------------------------------------|------------------|
| Any medication                   | 4 (8%)                      | 4 (5%)            | 8 (5%)                      | 6 (4%)                             | 22 (5%)          |
| AMOXICILLIN                      | 0                           | 2 (3%)            | 3 (2%)                      | 0                                  | 5 (1%)           |
| CIPROFLOXACIN                    | 0                           | 0                 | 3 (2%)                      | 0                                  | 3 (<1%)          |
| ACYCLOVIR                        | 0                           | 0                 | 1 (<1%)                     | 1 (<1%)                            | 2 (<1%)          |
| BENZYLPENICILLIN                 | 0                           | 1 (1%)            | 0                           | 1 (<1%)                            | 2 (<1%)          |
| METRONIDAZOLE                    | 1 (2%)                      | 0                 | 1 (<1%)                     | 0                                  | 2 (<1%)          |
| AZITHROMYCIN                     | 1 (2%)                      | 0                 | 0                           | 0                                  | 1 (<1%)          |
| CEFALEXIN                        | 0                           | 0                 | 0                           | 1 (<1%)                            | 1 (<1%)          |
| CLARITHROMYCIN                   | 1 (2%)                      | 0                 | 0                           | 0                                  | 1 (<1%)          |
| DOXYCYCLINE                      | 0                           | 0                 | 1 (<1%)                     | 0                                  | 1 (<1%)          |
| EFAVIRENZ                        | 0                           | 0                 | 1 (<1%)                     | 0                                  | 1 (<1%)          |
| EMTRICITABINE                    | 0                           | 0                 | 1 (<1%)                     | 0                                  | 1 (<1%)          |
| IMMUNOGLOBULINS NOS              | 0                           | 0                 | 0                           | 1 (<1%)                            | 1 (<1%)          |
| KETOCONAZOLE                     | 0                           | 0                 | 0                           | 1 (<1%)                            | 1 (<1%)          |
| LYSOZYME                         | 0                           | 1 (1%)            | 0                           | 0                                  | 1 (<1%)          |
| METHENAMINE                      | 0                           | 1 (1%)            | 0                           | 0                                  | 1 (<1%)          |
| MOXIFLOXACIN                     | 1 (2%)                      | 0                 | 0                           | 0                                  | 1 (<1%)          |
| NEOMYCIN                         | 1 (2%)                      | 0                 | 0                           | 0                                  | 1 (<1%)          |
| POLYMYXIN B                      | 1 (2%)                      | 0                 | 0                           | 0                                  | 1 (<1%)          |
| TENOFOVIR DISOPROXIL<br>FUMARATE | 0                           | 0                 | 1 (<1%)                     | 0                                  | 1 (<1%)          |
| VALACICLOVIR HYDROCHLORIDE       | 0                           | 0                 | 0                           | 1 (<1%)                            | 1 (<1%)          |
| VARIOUS                          |                             |                   |                             |                                    |                  |
| Any medication                   | 1 (2%)                      | 6 (8%)            | 7 (5%)                      | 8 (6%)                             | 22 (5%)          |
| CHONDROITIN                      | 0                           | 1 (1%)            | 2 (1%)                      | 2 (1%)                             | 5 (1%)           |

Note: A medication may be included in more than one ATC Level category and appear more than once.

Note: The following ingredient terms, which do not have an associated ATC Level 1 term, were also taken during Run-in with the following frequencies: Bovine Prostate: SAL 50mcg-1 subject, <1%, Capsicum Annuum: SAL 50mcg-1 subject, <1%, Dextroamphetamine Saccharate: Placebo-1 subject, 1%, Lactoperoxidase: Placebo-1 subject, 1%, and Zinc Arginate: SAL 50mcg-1 subject, <1%.

dln73797: /arenv/arprod/ccil18781\_gr33343/asq112989/final/drivers/cm\_t004\_noncopddurri.sas 24AUG2010 15:26

123

CONFIDENTIAL

ASQ112989

Protocol: ASQ112989  
Population: Run-in

Page 22 of 23

Table 1.23  
Summary of Non-COPD Medications Taken During the Run-in

| ATC Level 1<br>Ingredient | Run-in<br>Failure<br>(N=52) | Placebo<br>(N=75) | SAL 50mcg<br>BID<br>(N=152) | FSC<br>250/50mcg<br>BID<br>(N=139) | Total<br>(N=418) |
|---------------------------|-----------------------------|-------------------|-----------------------------|------------------------------------|------------------|
| PLANTAGO OVATA            | 1 (2%)                      | 0                 | 1 (<1%)                     | 2 (1%)                             | 4 (<1%)          |
| AMBIGUOUS MEDICATION      | 0                           | 1 (1%)            | 2 (1%)                      | 0                                  | 3 (<1%)          |
| DIMETHYL SULFONE          | 0                           | 0                 | 2 (1%)                      | 1 (<1%)                            | 3 (<1%)          |
| ALLIUM SATIVUM            | 0                           | 0                 | 1 (<1%)                     | 1 (<1%)                            | 2 (<1%)          |
| CINNAMOMUM VERUM          | 0                           | 0                 | 0                           | 2 (1%)                             | 2 (<1%)          |
| HERBALS NOS               | 0                           | 0                 | 2 (1%)                      | 0                                  | 2 (<1%)          |
| MONASCUS PURPUREUS        | 0                           | 1 (1%)            | 0                           | 1 (<1%)                            | 2 (<1%)          |
| ACETYLCYSTEINE            | 0                           | 0                 | 1 (<1%)                     | 0                                  | 1 (<1%)          |
| ANTIOXIDANTS NOS          | 0                           | 0                 | 1 (<1%)                     | 0                                  | 1 (<1%)          |
| ECHINACEA                 | 0                           | 0                 | 0                           | 1 (<1%)                            | 1 (<1%)          |
| EUGENIA CARYOPHYLLATA     | 0                           | 0                 | 1 (<1%)                     | 0                                  | 1 (<1%)          |
| GLUCOSE OXIDASE           | 0                           | 1 (1%)            | 0                           | 0                                  | 1 (<1%)          |
| HERBAL EXTRACTS NOS       | 0                           | 0                 | 1 (<1%)                     | 0                                  | 1 (<1%)          |
| LACTOFERRIN               | 0                           | 1 (1%)            | 0                           | 0                                  | 1 (<1%)          |
| LINUM USITATISSIMUM OIL   | 0                           | 0                 | 0                           | 1 (<1%)                            | 1 (<1%)          |
| MEDICAGO SATIVA           | 0                           | 0                 | 1 (<1%)                     | 0                                  | 1 (<1%)          |
| METHIONINE                | 0                           | 0                 | 1 (<1%)                     | 0                                  | 1 (<1%)          |
| METHYLTHIONINIUM CHLORIDE | 0                           | 1 (1%)            | 0                           | 0                                  | 1 (<1%)          |
| NALOXONE HYDROCHLORIDE    | 0                           | 0                 | 0                           | 1 (<1%)                            | 1 (<1%)          |
| OENOTHERA BIENNIS OIL     | 0                           | 0                 | 0                           | 1 (<1%)                            | 1 (<1%)          |
| OXYGEN                    | 0                           | 0                 | 0                           | 1 (<1%)                            | 1 (<1%)          |
| PHYTOSTEROL (NOS)         | 0                           | 1 (1%)            | 0                           | 0                                  | 1 (<1%)          |
| SOYA LECITHIN             | 0                           | 0                 | 1 (<1%)                     | 0                                  | 1 (<1%)          |
| VITIS VINIFERA EXTRACT    | 0                           | 0                 | 0                           | 1 (<1%)                            | 1 (<1%)          |
| ZEA MAYS                  | 0                           | 0                 | 1 (<1%)                     | 0                                  | 1 (<1%)          |

Note: A medication may be included in more than one ATC Level category and appear more than once.

Note: The following ingredient terms, which do not have an associated ATC Level 1 term, were also taken during Run-in with the following frequencies: Bovine Prostate: SAL 50mcg-1 subject, <1%, Capsicum Annuum: SAL 50mcg-1 subject, <1%, Dextroamphetamine Saccharate: Placebo-1 subject, 1%, Lactoperoxidase: Placebo-1 subject, 1%, and Zinc Arginate: SAL 50mcg-1 subject, <1%.

dln73797: /arenv/arprod/ccil8781\_gr33343/asq112989/final/drivers/cm\_t004\_noncopddurri.sas 24AUG2010 15:26

124

CONFIDENTIAL

ASQ112989



Protocol: ASQ112989  
 Population: Run-in

Page 23 of 23

Table 1.23  
 Summary of Non-COPD Medications Taken During the Run-in

| ATC Level 1<br>Ingredient                           | Run-in<br>Failure<br>(N=52) | Placebo<br>(N=75) | SAL 50mcg<br>BID<br>(N=152) | FSC<br>250/50mcg<br>BID<br>(N=139) | Total<br>(N=418) |
|-----------------------------------------------------|-----------------------------|-------------------|-----------------------------|------------------------------------|------------------|
| ANTINEOPLASTIC AND IMMUNOMODULATING AGENTS          |                             |                   |                             |                                    |                  |
| Any medication                                      | 2 (4%)                      | 2 (3%)            | 4 (3%)                      | 6 (4%)                             | 14 (3%)          |
| ESTRADIOL                                           | 1 (2%)                      | 1 (1%)            | 2 (1%)                      | 1 (<1%)                            | 5 (1%)           |
| ESTROGENS CONJUGATED                                | 1 (2%)                      | 0                 | 0                           | 2 (1%)                             | 3 (<1%)          |
| TAMOXIFEN                                           | 0                           | 0                 | 1 (<1%)                     | 1 (<1%)                            | 2 (<1%)          |
| BEVACIZUMAB                                         | 0                           | 0                 | 0                           | 1 (<1%)                            | 1 (<1%)          |
| CICLOSPORIN                                         | 0                           | 0                 | 1 (<1%)                     | 0                                  | 1 (<1%)          |
| INTERFERON BETA                                     | 0                           | 0                 | 0                           | 1 (<1%)                            | 1 (<1%)          |
| MEDROXYPROGESTERONE ACETATE                         | 1 (2%)                      | 0                 | 0                           | 0                                  | 1 (<1%)          |
| RALOXIFENE HYDROCHLORIDE                            | 0                           | 1 (1%)            | 0                           | 0                                  | 1 (<1%)          |
| ANTIPARASITIC PRODUCTS, INSECTICIDES AND REPELLENTS |                             |                   |                             |                                    |                  |
| Any medication                                      | 1 (2%)                      | 0                 | 1 (<1%)                     | 0                                  | 2 (<1%)          |
| METRONIDAZOLE                                       | 1 (2%)                      | 0                 | 1 (<1%)                     | 0                                  | 2 (<1%)          |

125

Note: A medication may be included in more than one ATC Level category and appear more than once.  
 Note: The following ingredient terms, which do not have an associated ATC Level 1 term, were also taken during Run-in with the following frequencies: Bovine Prostate: SAL 50mcg-1 subject, <1%, Capsicum Annuum: SAL 50mcg-1 subject, <1%, Dextroamphetamine Saccharate: Placebo-1 subject, 1%, Lactoperoxidase: Placebo-1 subject, 1%, and Zinc Arginate: SAL 50mcg-1 subject, <1%.  
 dln73797: /arenv/arprod/ccil8781\_gr33343/asq112989/final/drivers/cm\_t004\_noncopddurri.sas 24AUG2010 15:26

CONFIDENTIAL

ASQ112989

Protocol: ASQ112989  
Population: Modified Intent-to-treat

Page 1 of 24

Table 1.24  
Summary of Non-COPD Medications Taken During Treatment

| ATC Level 1<br>Ingredient | Placebo<br>(N=75) | SAL 50mcg<br>BID<br>(N=151) | FSC<br>250/50mcg<br>BID<br>(N=139) |
|---------------------------|-------------------|-----------------------------|------------------------------------|
| Any medication            | 63 (84%)          | 135 (89%)                   | 128 (92%)                          |
| NERVOUS SYSTEM            |                   |                             |                                    |
| Any medication            | 48 (64%)          | 103 (68%)                   | 101 (73%)                          |
| ACETYLSALICYLIC ACID      | 20 (27%)          | 50 (33%)                    | 50 (36%)                           |
| PARACETAMOL               | 11 (15%)          | 41 (27%)                    | 34 (24%)                           |
| IBUPROFEN                 | 9 (12%)           | 22 (15%)                    | 15 (11%)                           |
| ALPRAZOLAM                | 4 (5%)            | 8 (5%)                      | 10 (7%)                            |
| GABAPENTIN                | 2 (3%)            | 6 (4%)                      | 8 (6%)                             |
| HYDROCODONE               | 2 (3%)            | 7 (5%)                      | 3 (2%)                             |
| TRAZODONE                 | 2 (3%)            | 3 (2%)                      | 6 (4%)                             |
| CLONAZEPAM                | 1 (1%)            | 3 (2%)                      | 6 (4%)                             |
| CLONIDINE                 | 1 (1%)            | 4 (3%)                      | 5 (4%)                             |
| LORAZEPAM                 | 2 (3%)            | 2 (1%)                      | 4 (3%)                             |
| CAFFEINE                  | 0                 | 4 (3%)                      | 3 (2%)                             |
| DULOXETINE                | 3 (4%)            | 3 (2%)                      | 1 (<1%)                            |
| FLUOXETINE HYDROCHLORIDE  | 2 (3%)            | 2 (1%)                      | 3 (2%)                             |
| PAROXETINE HYDROCHLORIDE  | 1 (1%)            | 3 (2%)                      | 3 (2%)                             |
| SERTRALINE HYDROCHLORIDE  | 0                 | 3 (2%)                      | 4 (3%)                             |
| BUPROPION HYDROCHLORIDE   | 1 (1%)            | 2 (1%)                      | 3 (2%)                             |
| ESCITALOPRAM OXALATE      | 1 (1%)            | 2 (1%)                      | 3 (2%)                             |
| OXYCODONE HYDROCHLORIDE   | 1 (1%)            | 2 (1%)                      | 3 (2%)                             |
| TEMAZEPAM                 | 1 (1%)            | 4 (3%)                      | 1 (<1%)                            |
| CITALOPRAM HYDROBROMIDE   | 1 (1%)            | 2 (1%)                      | 2 (1%)                             |
| DIAZEPAM                  | 0                 | 4 (3%)                      | 1 (<1%)                            |
| ZOLPIDEM TARTRATE         | 1 (1%)            | 1 (<1%)                     | 3 (2%)                             |

Note: A medication may be included in more than one ATC Level category and appear more than once.  
Note: The following ingredient terms, which do not have associated ATC Level 1 terms, were also used during Treatment with the following frequencies: Bovine Prostate: SAL 50mcg-1 subject, <1%, Capsicum Annum: SAL 50mcg-1 subject, <1%, Dextroamphetamine Saccharate: Placebo-1 subject, 1%, Lactoperoxidase: Placebo-1 subject, 1%, and Zinc Arginate: SAL 50mcg-1 subject, <1%.

dln73797: /arenv/arprod/ccil18781\_gr33343/asq112989/final/drivers/cm\_t005\_noncopddur.sas 24AUG2010 15:59

Protocol: ASQ112989  
 Population: Modified Intent-to-treat

Page 2 of 24

Table 1.24  
 Summary of Non-COPD Medications Taken During Treatment

| ATC Level 1<br>Ingredient        | Placebo<br>(N=75) | SAL 50mcg<br>BID<br>(N=151) | FSC<br>250/50mcg<br>BID<br>(N=139) |
|----------------------------------|-------------------|-----------------------------|------------------------------------|
| BUPROPION                        | 2 (3%)            | 1 (<1%)                     | 1 (<1%)                            |
| CYCLOBENZAPRINE<br>HYDROCHLORIDE | 1 (1%)            | 0                           | 3 (2%)                             |
| PROMETHAZINE                     | 2 (3%)            | 2 (1%)                      | 0                                  |
| ROPINIROLE HYDROCHLORIDE         | 0                 | 1 (<1%)                     | 3 (2%)                             |
| TRAMADOL HYDROCHLORIDE           | 1 (1%)            | 1 (<1%)                     | 2 (1%)                             |
| VARENICLINE TARTRATE             | 2 (3%)            | 1 (<1%)                     | 1 (<1%)                            |
| VENLAFAXINE HYDROCHLORIDE        | 0                 | 3 (2%)                      | 1 (<1%)                            |
| AMITRIPTYLINE                    | 0                 | 2 (1%)                      | 1 (<1%)                            |
| AMITRIPTYLINE HYDROCHLORIDE      | 0                 | 1 (<1%)                     | 2 (1%)                             |
| ARIPIPIRAZOLE                    | 1 (1%)            | 1 (<1%)                     | 1 (<1%)                            |
| CITALOPRAM                       | 1 (1%)            | 1 (<1%)                     | 1 (<1%)                            |
| DEXTROPROPOXYPHENE NAPSILATE     | 0                 | 0                           | 3 (2%)                             |
| NICOTINE                         | 1 (1%)            | 1 (<1%)                     | 1 (<1%)                            |
| OLANZAPINE                       | 1 (1%)            | 1 (<1%)                     | 1 (<1%)                            |
| OXYCODONE                        | 0                 | 1 (<1%)                     | 2 (1%)                             |
| PAROXETINE                       | 0                 | 3 (2%)                      | 0                                  |
| PREGABALIN                       | 1 (1%)            | 0                           | 2 (1%)                             |
| SERTRALINE                       | 0                 | 0                           | 3 (2%)                             |
| BENZOCAINE                       | 0                 | 1 (<1%)                     | 1 (<1%)                            |
| CAPSAICIN                        | 0                 | 0                           | 2 (1%)                             |
| CLONIDINE HYDROCHLORIDE          | 0                 | 1 (<1%)                     | 1 (<1%)                            |
| CYCLOBENZAPRINE                  | 0                 | 1 (<1%)                     | 1 (<1%)                            |
| ESZOPICLONE                      | 1 (1%)            | 1 (<1%)                     | 0                                  |
| EXCEDRIN (NOS)                   | 1 (1%)            | 1 (<1%)                     | 0                                  |
| HYDROXYZINE                      | 0                 | 2 (1%)                      | 0                                  |

Note: A medication may be included in more than one ATC Level category and appear more than once.  
 Note: The following ingredient terms, which do not have associated ATC Level 1 terms, were also used during Treatment with the following frequencies: Bovine Prostate: SAL 50mcg-1 subject, <1%, Capsicum Annum: SAL 50mcg-1 subject, <1%, Dextroamphetamine Saccharate: Placebo-1 subject, 1%, Lactoperoxidase: Placebo-1 subject, 1%, and Zinc Arginate: SAL 50mcg-1 subject, <1%.  
 dln73797: /arenv/arprod/ccil18781\_gr33343/asq112989/final/drivers/cm\_t005\_noncopddur.sas 24AUG2010 15:59

127

CONFIDENTIAL

ASQ112989

Protocol: ASQ112989  
Population: Modified Intent-to-treat

Page 3 of 24

Table 1.24  
Summary of Non-COPD Medications Taken During Treatment

| ATC Level 1<br>Ingredient   | Placebo<br>(N=75) | SAL 50mcg<br>BID<br>(N=151) | FSC<br>250/50mcg<br>BID<br>(N=139) |
|-----------------------------|-------------------|-----------------------------|------------------------------------|
| HYDROXYZINE HYDROCHLORIDE   | 1 (1%)            | 1 (<1%)                     | 0                                  |
| LAMOTRIGINE                 | 0                 | 0                           | 2 (1%)                             |
| LIDOCAINE                   | 0                 | 2 (1%)                      | 0                                  |
| MIDAZOLAM                   | 0                 | 1 (<1%)                     | 1 (<1%)                            |
| MORPHINE                    | 0                 | 1 (<1%)                     | 1 (<1%)                            |
| NORTRIPTYLINE               | 1 (1%)            | 0                           | 1 (<1%)                            |
| QUETIAPINE FUMARATE         | 1 (1%)            | 0                           | 1 (<1%)                            |
| TRAMADOL                    | 1 (1%)            | 0                           | 1 (<1%)                            |
| AMFETAMINE ASPARTATE        | 1 (1%)            | 0                           | 0                                  |
| AMFETAMINE SULFATE          | 1 (1%)            | 0                           | 0                                  |
| BECLAMIDE                   | 0                 | 0                           | 1 (<1%)                            |
| BENZODIAZEPINE, NOS         | 0                 | 1 (<1%)                     | 0                                  |
| BETHANECHOL CHLORIDE        | 0                 | 1 (<1%)                     | 0                                  |
| BUPRENORPHINE HYDROCHLORIDE | 0                 | 0                           | 1 (<1%)                            |
| BUSPIRONE                   | 0                 | 1 (<1%)                     | 0                                  |
| BUSPIRONE HYDROCHLORIDE     | 0                 | 1 (<1%)                     | 0                                  |
| BUTALBITAL                  | 0                 | 0                           | 1 (<1%)                            |
| BUTYL AMINO BENZOATE        | 0                 | 0                           | 1 (<1%)                            |
| CARBAMAZEPINE               | 0                 | 0                           | 1 (<1%)                            |
| COCAINE                     | 0                 | 0                           | 1 (<1%)                            |
| CODEINE                     | 0                 | 0                           | 1 (<1%)                            |
| CODEINE PHOSPHATE           | 0                 | 1 (<1%)                     | 0                                  |
| CRACK COCAINE               | 0                 | 0                           | 1 (<1%)                            |
| DEXAMFETAMINE SULFATE       | 1 (1%)            | 0                           | 0                                  |
| DIPOTASSIUM CLORAZEPATE     | 0                 | 0                           | 1 (<1%)                            |
| FENTANYL                    | 0                 | 0                           | 1 (<1%)                            |

Note: A medication may be included in more than one ATC Level category and appear more than once.

Note: The following ingredient terms, which do not have associated ATC Level 1 terms, were also used during Treatment with the following frequencies: Bovine Prostate: SAL 50mcg-1 subject, <1%, Capsicum Annum: SAL 50mcg-1 subject, <1%, Dextroamphetamine Saccharate: Placebo-1 subject, 1%, Lactoperoxidase: Placebo-1 subject, 1%, and Zinc Arginate: SAL 50mcg-1 subject, <1%.

dln73797: /arenv/arprod/ccil8781\_gr33343/asq112989/final/drivers/cm\_t005\_noncopddur.sas 24AUG2010 15:59

128

CONFIDENTIAL

ASQ112989

Protocol: ASQ112989

Population: Modified Intent-to-treat

Page 4 of 24

Table 1.24  
Summary of Non-COPD Medications Taken During Treatment

| ATC Level 1<br>Ingredient          | Placebo<br>(N=75) | SAL 50mcg<br>BID<br>(N=151) | FSC<br>250/50mcg<br>BID<br>(N=139) |
|------------------------------------|-------------------|-----------------------------|------------------------------------|
| FLUOXETINE                         | 1 (1%)            | 0                           | 0                                  |
| HYDROMORPHONE                      | 0                 | 1 (<1%)                     | 0                                  |
| KETOROLAC TROMETAMOL               | 1 (1%)            | 0                           | 0                                  |
| LIDOCAINE HYDROCHLORIDE            | 0                 | 1 (<1%)                     | 0                                  |
| METHYLPHENIDATE<br>HYDROCHLORIDE   | 0                 | 0                           | 1 (<1%)                            |
| MIRTAZAPINE                        | 0                 | 0                           | 1 (<1%)                            |
| PETHIDINE HYDROCHLORIDE            | 0                 | 1 (<1%)                     | 0                                  |
| PHENOBARBITAL                      | 0                 | 1 (<1%)                     | 0                                  |
| PHENYTOIN                          | 0                 | 1 (<1%)                     | 0                                  |
| PRAMIPEXOLE DIHYDROCHLORIDE        | 0                 | 0                           | 1 (<1%)                            |
| PROCHLORPERAZINE                   | 0                 | 0                           | 1 (<1%)                            |
| PROMETHAZINE HYDROCHLORIDE         | 0                 | 1 (<1%)                     | 0                                  |
| ROPINIROLE                         | 0                 | 0                           | 1 (<1%)                            |
| SULTOPRIDE                         | 1 (1%)            | 0                           | 0                                  |
| SUMATRIPTAN                        | 0                 | 1 (<1%)                     | 0                                  |
| SUMATRIPTAN SUCCINATE              | 1 (1%)            | 0                           | 0                                  |
| TETRACAINE HYDROCHLORIDE           | 0                 | 0                           | 1 (<1%)                            |
| TOMEXETINE HYDROCHLORIDE           | 0                 | 0                           | 1 (<1%)                            |
| TRAZODONE HYDROCHLORIDE            | 0                 | 1 (<1%)                     | 0                                  |
| VALPROIC ACID                      | 0                 | 0                           | 1 (<1%)                            |
| VENLAFAXINE                        | 1 (1%)            | 0                           | 0                                  |
| ZOLPIDEM                           | 1 (1%)            | 0                           | 0                                  |
| ALIMENTARY TRACT AND<br>METABOLISM |                   |                             |                                    |

Note: A medication may be included in more than one ATC Level category and appear more than once.

Note: The following ingredient terms, which do not have associated ATC Level 1 terms, were also used during Treatment with the following frequencies: Bovine Prostate: SAL 50mcg-1 subject, <1%, Capsicum Annum: SAL 50mcg-1 subject, <1%, Dextroamphetamine Saccharate: Placebo-1 subject, 1%, Lactoperoxidase: Placebo-1 subject, 1%, and Zinc Arginate: SAL 50mcg-1 subject, <1%.

dln73797: /arenv/arprod/ccil18781\_gr33343/asq112989/final/drivers/cm\_t005\_noncopddur.sas 24AUG2010 15:59

129

CONFIDENTIAL

ASQ112989

Protocol: ASQ112989  
Population: Modified Intent-to-treat

Page 5 of 24

Table 1.24  
Summary of Non-COPD Medications Taken During Treatment

| ATC Level 1<br>Ingredient | Placebo<br>(N=75) | SAL 50mcg<br>BID<br>(N=151) | FSC<br>250/50mcg<br>BID<br>(N=139) |
|---------------------------|-------------------|-----------------------------|------------------------------------|
| Any medication            | 43 (57%)          | 93 (62%)                    | 96 (69%)                           |
| ACETYLSALICYLIC ACID      | 20 (27%)          | 50 (33%)                    | 50 (36%)                           |
| VITAMINS NOS              | 11 (15%)          | 18 (12%)                    | 22 (16%)                           |
| OMEPRAZOLE                | 5 (7%)            | 20 (13%)                    | 17 (12%)                           |
| CALCIUM                   | 5 (7%)            | 8 (5%)                      | 13 (9%)                            |
| METFORMIN                 | 0                 | 7 (5%)                      | 10 (7%)                            |
| ASCORBIC ACID             | 3 (4%)            | 9 (6%)                      | 2 (1%)                             |
| POTASSIUM CHLORIDE        | 3 (4%)            | 6 (4%)                      | 5 (4%)                             |
| ERGOCALCIFEROL            | 2 (3%)            | 4 (3%)                      | 6 (4%)                             |
| ESOMEPRAZOLE MAGNESIUM    | 1 (1%)            | 5 (3%)                      | 6 (4%)                             |
| PANTOPRAZOLE              | 2 (3%)            | 3 (2%)                      | 7 (5%)                             |
| VITAMIN D NOS             | 3 (4%)            | 5 (3%)                      | 4 (3%)                             |
| METFORMIN HYDROCHLORIDE   | 2 (3%)            | 2 (1%)                      | 7 (5%)                             |
| MINERALS NOS              | 4 (5%)            | 3 (2%)                      | 4 (3%)                             |
| FAMOTIDINE                | 4 (5%)            | 1 (<1%)                     | 5 (4%)                             |
| RANITIDINE                | 3 (4%)            | 5 (3%)                      | 1 (<1%)                            |
| GLIPIZIDE                 | 1 (1%)            | 4 (3%)                      | 3 (2%)                             |
| RANITIDINE HYDROCHLORIDE  | 2 (3%)            | 4 (3%)                      | 2 (1%)                             |
| TOCOPHEROL                | 2 (3%)            | 4 (3%)                      | 2 (1%)                             |
| LANSOPRAZOLE              | 1 (1%)            | 4 (3%)                      | 2 (1%)                             |
| CALCIUM CARBONATE         | 2 (3%)            | 1 (<1%)                     | 3 (2%)                             |
| POTASSIUM NOS             | 1 (1%)            | 3 (2%)                      | 2 (1%)                             |
| GLIBENCLAMIDE             | 1 (1%)            | 3 (2%)                      | 1 (<1%)                            |
| GLIMEPIRIDE               | 0                 | 1 (<1%)                     | 3 (2%)                             |
| INSULIN ASPART            | 2 (3%)            | 2 (1%)                      | 0                                  |
| LOPERAMIDE HYDROCHLORIDE  | 1 (1%)            | 1 (<1%)                     | 2 (1%)                             |

Note: A medication may be included in more than one ATC Level category and appear more than once.

Note: The following ingredient terms, which do not have associated ATC Level 1 terms, were also used during Treatment with the following frequencies: Bovine Prostate: SAL 50mcg-1 subject, <1%, Capsicum Annum: SAL 50mcg-1 subject, <1%, Dextroamphetamine Saccharate: Placebo-1 subject, 1%, Lactoperoxidase: Placebo-1 subject, 1%, and Zinc Arginate: SAL 50mcg-1 subject, <1%.

dln73797: /arenv/arprod/ccil18781\_gr33343/asq112989/final/drivers/cm\_t005\_noncopddur.sas 24AUG2010 15:59

130

CONFIDENTIAL

ASQ112989

Protocol: ASQ112989  
 Population: Modified Intent-to-treat

Page 6 of 24

Table 1.24  
 Summary of Non-COPD Medications Taken During Treatment

| ATC Level 1<br>Ingredient            | Placebo<br>(N=75) | SAL 50mcg<br>BID<br>(N=151) | FSC<br>250/50mcg<br>BID<br>(N=139) |
|--------------------------------------|-------------------|-----------------------------|------------------------------------|
| PROMETHAZINE                         | 2 (3%)            | 2 (1%)                      | 0                                  |
| DEXLANSOPRAZOLE                      | 0                 | 2 (1%)                      | 1 (<1%)                            |
| INSULIN DETEMIR                      | 2 (3%)            | 1 (<1%)                     | 0                                  |
| INSULIN GLARGINE                     | 0                 | 1 (<1%)                     | 2 (1%)                             |
| PLANTAGO OVATA                       | 0                 | 1 (<1%)                     | 2 (1%)                             |
| PYRIDOXINE HYDROCHLORIDE             | 0                 | 2 (1%)                      | 1 (<1%)                            |
| SITAGLIPTIN                          | 0                 | 1 (<1%)                     | 2 (1%)                             |
| THIAMINE HYDROCHLORIDE               | 1 (1%)            | 1 (<1%)                     | 1 (<1%)                            |
| ZINC                                 | 1 (1%)            | 1 (<1%)                     | 1 (<1%)                            |
| BETACAROTENE                         | 0                 | 2 (1%)                      | 0                                  |
| CALCIUM CITRATE                      | 1 (1%)            | 0                           | 1 (<1%)                            |
| CINNAMOMUM VERUM                     | 0                 | 0                           | 2 (1%)                             |
| COLECALCIFEROL                       | 0                 | 0                           | 2 (1%)                             |
| COPPER                               | 0                 | 2 (1%)                      | 0                                  |
| HYDROCORTISONE                       | 0                 | 2 (1%)                      | 0                                  |
| HYOSCYAMINE SULFATE                  | 1 (1%)            | 1 (<1%)                     | 0                                  |
| INSULIN HUMAN INJECTION,<br>ISOPHANE | 1 (1%)            | 0                           | 1 (<1%)                            |
| LACTOBACILLUS ACIDOPHILUS            | 1 (1%)            | 1 (<1%)                     | 0                                  |
| MAGNESIUM OXIDE                      | 0                 | 2 (1%)                      | 0                                  |
| METOCLOPRAMIDE HYDROCHLORIDE         | 1 (1%)            | 1 (<1%)                     | 0                                  |
| METRONIDAZOLE                        | 1 (1%)            | 1 (<1%)                     | 0                                  |
| PIOGLITAZONE HYDROCHLORIDE           | 1 (1%)            | 0                           | 1 (<1%)                            |
| RABEPRAZOLE SODIUM                   | 0                 | 1 (<1%)                     | 1 (<1%)                            |
| RIBOFLAVIN                           | 0                 | 2 (1%)                      | 0                                  |
| SELENIUM                             | 0                 | 1 (<1%)                     | 1 (<1%)                            |

Note: A medication may be included in more than one ATC Level category and appear more than once.  
 Note: The following ingredient terms, which do not have associated ATC Level 1 terms, were also used during Treatment with the following frequencies: Bovine Prostate: SAL 50mcg-1 subject, <1%, Capsicum Annum: SAL 50mcg-1 subject, <1%, Dextroamphetamine Saccharate: Placebo-1 subject, 1%, Lactoperoxidase: Placebo-1 subject, 1%, and Zinc Arginate: SAL 50mcg-1 subject, <1%.  
 dln73797: /arenv/arprod/ccil18781\_gr33343/asq112989/final/drivers/cm\_t005\_noncopddur.sas 24AUG2010 15:59

131

CONFIDENTIAL

ASQ112989

Protocol: ASQ112989  
Population: Modified Intent-to-treat

Page 7 of 24

Table 1.24  
Summary of Non-COPD Medications Taken During Treatment

| ATC Level 1<br>Ingredient             | Placebo<br>(N=75) | SAL 50mcg<br>BID<br>(N=151) | FSC<br>250/50mcg<br>BID<br>(N=139) |
|---------------------------------------|-------------------|-----------------------------|------------------------------------|
| SENNA                                 | 0                 | 0                           | 2 (1%)                             |
| SODIUM CHLORIDE                       | 1 (1%)            | 1 (<1%)                     | 0                                  |
| VITAMIN B SUBSTANCES NOS              | 0                 | 1 (<1%)                     | 1 (<1%)                            |
| ATROPINE SULFATE                      | 0                 | 1 (<1%)                     | 0                                  |
| BIFIDOBACTERIUM INFANTIS              | 0                 | 1 (<1%)                     | 0                                  |
| BIOTIN                                | 0                 | 0                           | 1 (<1%)                            |
| CHOLINE BITARTRATE                    | 0                 | 0                           | 1 (<1%)                            |
| CITRIC ACID                           | 0                 | 0                           | 1 (<1%)                            |
| CLOTRIMAZOLE                          | 0                 | 0                           | 1 (<1%)                            |
| DEXAMFETAMINE SULFATE                 | 1 (1%)            | 0                           | 0                                  |
| DICYCLOVERINE HYDROCHLORIDE           | 0                 | 0                           | 1 (<1%)                            |
| DIHYDROXYALUMINUM SODIUM<br>CARBONATE | 0                 | 1 (<1%)                     | 0                                  |
| DOCUSATE                              | 0                 | 0                           | 1 (<1%)                            |
| DOCUSATE SODIUM                       | 1 (1%)            | 0                           | 0                                  |
| DULCOLAX (NOS)                        | 1 (1%)            | 0                           | 0                                  |
| ESOMEPRAZOLE                          | 1 (1%)            | 0                           | 0                                  |
| HYDROCORTISONE VALERATE               | 0                 | 1 (<1%)                     | 0                                  |
| HYOSCINE HYDROBROMIDE                 | 0                 | 1 (<1%)                     | 0                                  |
| INSULIN HUMAN                         | 1 (1%)            | 0                           | 0                                  |
| INSULIN LISPRO                        | 0                 | 1 (<1%)                     | 0                                  |
| INSULIN NOS                           | 0                 | 1 (<1%)                     | 0                                  |
| ISOPHANE INSULIN                      | 0                 | 0                           | 1 (<1%)                            |
| LAXATIVES, NOS                        | 1 (1%)            | 0                           | 0                                  |
| MAGNESIUM                             | 0                 | 0                           | 1 (<1%)                            |
| MAGNESIUM GLUCONATE                   | 0                 | 0                           | 1 (<1%)                            |

Note: A medication may be included in more than one ATC Level category and appear more than once.

Note: The following ingredient terms, which do not have associated ATC Level 1 terms, were also used during Treatment with the following frequencies: Bovine Prostate: SAL 50mcg-1 subject, <1%, Capsicum Annum: SAL 50mcg-1 subject, <1%, Dextroamphetamine Saccharate: Placebo-1 subject, 1%, Lactoperoxidase: Placebo-1 subject, 1%, and Zinc Arginate: SAL 50mcg-1 subject, <1%.

dln73797: /arenv/arprod/ccil8781\_gr33343/asq112989/final/drivers/cm\_t005\_noncopddur.sas 24AUG2010 15:59

132

CONFIDENTIAL

ASQ112989



Protocol: ASQ112989  
 Population: Modified Intent-to-treat

Page 8 of 24

Table 1.24  
 Summary of Non-COPD Medications Taken During Treatment

| ATC Level 1<br>Ingredient  | Placebo<br>(N=75) | SAL 50mcg<br>BID<br>(N=151) | FSC<br>250/50mcg<br>BID<br>(N=139) |
|----------------------------|-------------------|-----------------------------|------------------------------------|
| MAGNESIUM HYDROXIDE        | 0                 | 1 (<1%)                     | 0                                  |
| MECLOZINE                  | 0                 | 1 (<1%)                     | 0                                  |
| ONDANSETRON                | 0                 | 1 (<1%)                     | 0                                  |
| PANTOTHENIC ACID           | 0                 | 1 (<1%)                     | 0                                  |
| POTASSIUM GLUCONATE        | 0                 | 1 (<1%)                     | 0                                  |
| PREDNISON                  | 0                 | 0                           | 1 (<1%)                            |
| PROCHLORPERAZINE           | 0                 | 0                           | 1 (<1%)                            |
| PROMETHAZINE HYDROCHLORIDE | 0                 | 1 (<1%)                     | 0                                  |
| PYRIDOXINE                 | 0                 | 1 (<1%)                     | 0                                  |
| REPAGLINIDE                | 0                 | 0                           | 1 (<1%)                            |
| RETINOL                    | 0                 | 1 (<1%)                     | 0                                  |
| ROSIGLITAZONE              | 0                 | 0                           | 1 (<1%)                            |
| SILYBUM MARIANUM           | 0                 | 0                           | 1 (<1%)                            |
| SODIUM BICARBONATE         | 0                 | 0                           | 1 (<1%)                            |
| SUCRALFATE                 | 0                 | 0                           | 1 (<1%)                            |
| TETRACYCLINE               | 1 (1%)            | 0                           | 0                                  |
| VANCOMYCIN                 | 0                 | 0                           | 1 (<1%)                            |
| VITAMIN B NOS              | 0                 | 1 (<1%)                     | 0                                  |
| ZEA MAYS                   | 0                 | 1 (<1%)                     | 0                                  |
| CARDIOVASCULAR SYSTEM      |                   |                             |                                    |
| Any medication             | 49 (65%)          | 94 (62%)                    | 88 (63%)                           |
| LISINAPRIL                 | 13 (17%)          | 24 (16%)                    | 29 (21%)                           |
| HYDROCHLOROTHIAZIDE        | 7 (9%)            | 24 (16%)                    | 23 (17%)                           |
| SIMVASTATIN                | 13 (17%)          | 22 (15%)                    | 14 (10%)                           |
| AMLODIPINE BESILATE        | 4 (5%)            | 10 (7%)                     | 9 (6%)                             |

Note: A medication may be included in more than one ATC Level category and appear more than once.  
 Note: The following ingredient terms, which do not have associated ATC Level 1 terms, were also used during Treatment with the following frequencies: Bovine Prostate: SAL 50mcg-1 subject, <1%, Capsicum Annum: SAL 50mcg-1 subject, <1%, Dextroamphetamine Saccharate: Placebo-1 subject, 1%, Lactoperoxidase: Placebo-1 subject, 1%, and Zinc Arginate: SAL 50mcg-1 subject, <1%.  
 dln73797: /arenv/arprod/ccil18781\_gr33343/asq112989/final/drivers/cm\_t005\_noncopddur.sas 24AUG2010 15:59

133

CONFIDENTIAL

ASQ112989

Protocol: ASQ112989  
Population: Modified Intent-to-treat

Page 9 of 24

Table 1.24  
Summary of Non-COPD Medications Taken During Treatment

| ATC Level 1<br>Ingredient    | Placebo<br>(N=75) | SAL 50mcg<br>BID<br>(N=151) | FSC<br>250/50mcg<br>BID<br>(N=139) |
|------------------------------|-------------------|-----------------------------|------------------------------------|
| AMLODIPINE                   | 4 (5%)            | 10 (7%)                     | 7 (5%)                             |
| ATORVASTATIN CALCIUM         | 2 (3%)            | 9 (6%)                      | 9 (6%)                             |
| ATENOLOL                     | 6 (8%)            | 8 (5%)                      | 4 (3%)                             |
| METOPROLOL                   | 3 (4%)            | 10 (7%)                     | 5 (4%)                             |
| CARVEDILOL                   | 2 (3%)            | 5 (3%)                      | 10 (7%)                            |
| FISH OIL                     | 3 (4%)            | 7 (5%)                      | 7 (5%)                             |
| FUROSEMIDE                   | 4 (5%)            | 8 (5%)                      | 5 (4%)                             |
| VALSARTAN                    | 1 (1%)            | 8 (5%)                      | 7 (5%)                             |
| PRAVASTATIN                  | 5 (7%)            | 6 (4%)                      | 4 (3%)                             |
| OLMESARTAN                   | 2 (3%)            | 9 (6%)                      | 1 (<1%)                            |
| CLONIDINE                    | 1 (1%)            | 4 (3%)                      | 5 (4%)                             |
| LOVASTATIN                   | 2 (3%)            | 2 (1%)                      | 6 (4%)                             |
| ROSUVASTATIN CALCIUM         | 1 (1%)            | 4 (3%)                      | 5 (4%)                             |
| FENOFIBRATE                  | 0                 | 4 (3%)                      | 4 (3%)                             |
| GLYCERYL TRINITRATE          | 1 (1%)            | 6 (4%)                      | 1 (<1%)                            |
| EZETIMIBE                    | 2 (3%)            | 4 (3%)                      | 1 (<1%)                            |
| TRIAMTERENE                  | 2 (3%)            | 2 (1%)                      | 3 (2%)                             |
| DIGOXIN                      | 1 (1%)            | 4 (3%)                      | 1 (<1%)                            |
| GEMFIBROZIL                  | 1 (1%)            | 2 (1%)                      | 3 (2%)                             |
| OMEGA-3 MARINE TRIGLYCERIDES | 3 (4%)            | 2 (1%)                      | 1 (<1%)                            |
| ENALAPRIL                    | 0                 | 2 (1%)                      | 3 (2%)                             |
| NICOTINIC ACID               | 0                 | 2 (1%)                      | 3 (2%)                             |
| UBIDECARENONE                | 1 (1%)            | 2 (1%)                      | 2 (1%)                             |
| BENAZEPRIL                   | 0                 | 3 (2%)                      | 1 (<1%)                            |
| DILTIAZEM                    | 0                 | 4 (3%)                      | 0                                  |
| DILTIAZEM HYDROCHLORIDE      | 0                 | 0                           | 4 (3%)                             |

Note: A medication may be included in more than one ATC Level category and appear more than once.

Note: The following ingredient terms, which do not have associated ATC Level 1 terms, were also used during Treatment with the following frequencies: Bovine Prostate: SAL 50mcg-1 subject, <1%, Capsicum Annum: SAL 50mcg-1 subject, <1%, Dextroamphetamine Saccharate: Placebo-1 subject, 1%, Lactoperoxidase: Placebo-1 subject, 1%, and Zinc Arginate: SAL 50mcg-1 subject, <1%.

dln73797: /arenv/arprod/ccil18781\_gr33343/asq112989/final/drivers/cm\_t005\_noncopddur.sas 24AUG2010 15:59

134

CONFIDENTIAL

ASQ112989

Protocol: ASQ112989  
 Population: Modified Intent-to-treat

Page 10 of 24

Table 1.24  
 Summary of Non-COPD Medications Taken During Treatment

| ATC Level 1<br>Ingredient   | Placebo<br>(N=75) | SAL 50mcg<br>BID<br>(N=151) | FSC<br>250/50mcg<br>BID<br>(N=139) |
|-----------------------------|-------------------|-----------------------------|------------------------------------|
| IRBESARTAN                  | 0                 | 3 (2%)                      | 1 (<1%)                            |
| METOPROLOL SUCCINATE        | 2 (3%)            | 0                           | 2 (1%)                             |
| METOPROLOL TARTRATE         | 0                 | 0                           | 4 (3%)                             |
| NEBIVOLOL HYDROCHLORIDE     | 1 (1%)            | 1 (<1%)                     | 2 (1%)                             |
| TERAZOSIN                   | 2 (3%)            | 1 (<1%)                     | 1 (<1%)                            |
| VERAPAMIL                   | 0                 | 4 (3%)                      | 0                                  |
| DOXAZOSIN MESILATE          | 2 (3%)            | 0                           | 1 (<1%)                            |
| LOSARTAN POTASSIUM          | 1 (1%)            | 0                           | 2 (1%)                             |
| NIFEDIPINE                  | 0                 | 1 (<1%)                     | 2 (1%)                             |
| PHENYLEPHRINE HYDROCHLORIDE | 1 (1%)            | 0                           | 2 (1%)                             |
| TORASEMIDE                  | 0                 | 2 (1%)                      | 1 (<1%)                            |
| BENZAPEPRIL HYDROCHLORIDE   | 0                 | 1 (<1%)                     | 1 (<1%)                            |
| BENZOCAINE                  | 0                 | 1 (<1%)                     | 1 (<1%)                            |
| CLONIDINE HYDROCHLORIDE     | 0                 | 1 (<1%)                     | 1 (<1%)                            |
| HYDROCORTISONE              | 0                 | 2 (1%)                      | 0                                  |
| LIDOCAINE                   | 0                 | 2 (1%)                      | 0                                  |
| METOLAZONE                  | 0                 | 2 (1%)                      | 0                                  |
| MONASCUS PURPUREUS          | 1 (1%)            | 0                           | 1 (<1%)                            |
| NADOLOL                     | 1 (1%)            | 0                           | 1 (<1%)                            |
| PENTOXIFYLLINE              | 2 (3%)            | 0                           | 0                                  |
| PRAVASTATIN SODIUM          | 0                 | 2 (1%)                      | 0                                  |
| QUINAPRIL                   | 1 (1%)            | 0                           | 1 (<1%)                            |
| TADALAFIL                   | 1 (1%)            | 0                           | 1 (<1%)                            |
| TERAZOSIN HYDROCHLORIDE     | 1 (1%)            | 0                           | 1 (<1%)                            |
| ALDACTONE (NOS)             | 0                 | 1 (<1%)                     | 0                                  |
| AMIODARONE                  | 0                 | 1 (<1%)                     | 0                                  |

Note: A medication may be included in more than one ATC Level category and appear more than once.  
 Note: The following ingredient terms, which do not have associated ATC Level 1 terms, were also used during Treatment with the following frequencies: Bovine Prostate: SAL 50mcg-1 subject, <1%, Capsicum Annum: SAL 50mcg-1 subject, <1%, Dextroamphetamine Saccharate: Placebo-1 subject, 1%, Lactoperoxidase: Placebo-1 subject, 1%, and Zinc Arginate: SAL 50mcg-1 subject, <1%.  
 dln73797: /arenv/arprod/ccil18781\_gr33343/asq112989/final/drivers/cm\_t005\_noncopddur.sas 24AUG2010 15:59

135

CONFIDENTIAL

ASQ112989

Protocol: ASQ112989

Population: Modified Intent-to-treat

Page 11 of 24

Table 1.24  
Summary of Non-COPD Medications Taken During Treatment

| ATC Level 1<br>Ingredient | Placebo<br>(N=75) | SAL 50mcg<br>BID<br>(N=151) | FSC<br>250/50mcg<br>BID<br>(N=139) |
|---------------------------|-------------------|-----------------------------|------------------------------------|
| BISOPROLOL FUMARATE       | 0                 | 0                           | 1 (<1%)                            |
| BUMETANIDE                | 1 (1%)            | 0                           | 0                                  |
| DOFETILIDE                | 0                 | 0                           | 1 (<1%)                            |
| DOXAZOSIN                 | 1 (1%)            | 0                           | 0                                  |
| DRONEDARONE               | 0                 | 1 (<1%)                     | 0                                  |
| ENALAPRIL MALEATE         | 1 (1%)            | 0                           | 0                                  |
| FELODIPINE                | 0                 | 0                           | 1 (<1%)                            |
| FLUVASTATIN SODIUM        | 0                 | 1 (<1%)                     | 0                                  |
| HYDRALAZINE               | 0                 | 1 (<1%)                     | 0                                  |
| HYDRALAZINE HYDROCHLORIDE | 0                 | 0                           | 1 (<1%)                            |
| INDAPAMIDE                | 0                 | 0                           | 1 (<1%)                            |
| INDOMETACIN               | 0                 | 0                           | 1 (<1%)                            |
| ISOSORBIDE                | 1 (1%)            | 0                           | 0                                  |
| ISOSORBIDE MONONITRATE    | 0                 | 1 (<1%)                     | 0                                  |
| LIDOCAINE HYDROCHLORIDE   | 0                 | 1 (<1%)                     | 0                                  |
| MOEXIPRIL HYDROCHLORIDE   | 0                 | 0                           | 1 (<1%)                            |
| NEBIVOLOL                 | 0                 | 1 (<1%)                     | 0                                  |
| PETROSELINUM CRISPUM      | 0                 | 1 (<1%)                     | 0                                  |
| PHENYLEPHRINE             | 0                 | 0                           | 1 (<1%)                            |
| PHYTOSTEROL (NOS)         | 1 (1%)            | 0                           | 0                                  |
| QUINAPRIL HYDROCHLORIDE   | 1 (1%)            | 0                           | 0                                  |
| ROSUVASTATIN              | 1 (1%)            | 0                           | 0                                  |
| SILODOSIN                 | 1 (1%)            | 0                           | 0                                  |
| SPIRONOLACTONE            | 1 (1%)            | 0                           | 0                                  |
| TELMISARTAN               | 0                 | 0                           | 1 (<1%)                            |
| TETRACAINE HYDROCHLORIDE  | 0                 | 0                           | 1 (<1%)                            |

Note: A medication may be included in more than one ATC Level category and appear more than once.

Note: The following ingredient terms, which do not have associated ATC Level 1 terms, were also used during Treatment with the following frequencies: Bovine Prostate: SAL 50mcg-1 subject, <1%, Capsicum Annum: SAL 50mcg-1 subject, <1%, Dextroamphetamine Saccharate: Placebo-1 subject, 1%, Lactoperoxidase: Placebo-1 subject, 1%, and Zinc Arginate: SAL 50mcg-1 subject, <1%.

dln73797: /arenv/arprod/ccil18781\_gr33343/asq112989/final/drivers/cm\_t005\_noncopddur.sas 24AUG2010 15:59

136

CONFIDENTIAL

ASQ112989

Protocol: ASQ112989  
 Population: Modified Intent-to-treat

Page 12 of 24

Table 1.24  
 Summary of Non-COPD Medications Taken During Treatment

| ATC Level 1<br>Ingredient        | Placebo<br>(N=75) | SAL 50mcg<br>BID<br>(N=151) | FSC<br>250/50mcg<br>BID<br>(N=139) |
|----------------------------------|-------------------|-----------------------------|------------------------------------|
| TIMOLOL                          | 0                 | 1 (<1%)                     | 0                                  |
| TIMOLOL MALEATE                  | 1 (1%)            | 0                           | 0                                  |
| TRANDOLAPRIL                     | 0                 | 1 (<1%)                     | 0                                  |
| <b>MUSCULO-SKELETAL SYSTEM</b>   |                   |                             |                                    |
| Any medication                   | 47 (63%)          | 76 (50%)                    | 77 (55%)                           |
| ACETYLSALICYLIC ACID             | 20 (27%)          | 50 (33%)                    | 50 (36%)                           |
| IBUPROFEN                        | 9 (12%)           | 22 (15%)                    | 15 (11%)                           |
| NAPROXEN SODIUM                  | 7 (9%)            | 5 (3%)                      | 6 (4%)                             |
| NAPROXEN                         | 4 (5%)            | 4 (3%)                      | 5 (4%)                             |
| ALENDRONATE SODIUM               | 4 (5%)            | 4 (3%)                      | 3 (2%)                             |
| MELOXICAM                        | 6 (8%)            | 1 (<1%)                     | 3 (2%)                             |
| CHONDROITIN                      | 1 (1%)            | 2 (1%)                      | 2 (1%)                             |
| ALLOPURINOL                      | 0                 | 3 (2%)                      | 1 (<1%)                            |
| CARISOPRODOL                     | 1 (1%)            | 1 (<1%)                     | 2 (1%)                             |
| CELECOXIB                        | 1 (1%)            | 1 (<1%)                     | 2 (1%)                             |
| CYCLOBENZAPRINE<br>HYDROCHLORIDE | 1 (1%)            | 0                           | 3 (2%)                             |
| GLUCOSAMINE                      | 1 (1%)            | 2 (1%)                      | 1 (<1%)                            |
| COLCHICINE                       | 1 (1%)            | 1 (<1%)                     | 1 (<1%)                            |
| DIMETHYL SULFONE                 | 0                 | 2 (1%)                      | 1 (<1%)                            |
| RISEDRONATE SODIUM               | 0                 | 0                           | 3 (2%)                             |
| ALENDRONIC ACID                  | 1 (1%)            | 0                           | 1 (<1%)                            |
| CAPSAICIN                        | 0                 | 0                           | 2 (1%)                             |
| CYCLOBENZAPRINE                  | 0                 | 1 (<1%)                     | 1 (<1%)                            |
| DICLOFENAC                       | 1 (1%)            | 1 (<1%)                     | 0                                  |

Note: A medication may be included in more than one ATC Level category and appear more than once.  
 Note: The following ingredient terms, which do not have associated ATC Level 1 terms, were also used during Treatment with the following frequencies: Bovine Prostate: SAL 50mcg-1 subject, <1%, Capsicum Annum: SAL 50mcg-1 subject, <1%, Dextroamphetamine Saccharate: Placebo-1 subject, 1%, Lactoperoxidase: Placebo-1 subject, 1%, and Zinc Arginate: SAL 50mcg-1 subject, <1%.  
 dln73797: /arenv/arprod/ccil8781\_gr33343/asq112989/final/drivers/cm\_t005\_noncopddur.sas 24AUG2010 15:59

137

CONFIDENTIAL

ASQ112989

Protocol: ASQ112989  
Population: Modified Intent-to-treat

Page 13 of 24

Table 1.24  
Summary of Non-COPD Medications Taken During Treatment

| ATC Level 1<br>Ingredient      | Placebo<br>(N=75) | SAL 50mcg<br>BID<br>(N=151) | FSC<br>250/50mcg<br>BID<br>(N=139) |
|--------------------------------|-------------------|-----------------------------|------------------------------------|
| GLUCOSAMINE SULFATE            | 0                 | 1 (<1%)                     | 1 (<1%)                            |
| NABUMETONE                     | 0                 | 1 (<1%)                     | 1 (<1%)                            |
| SODIUM IBANDRONATE             | 0                 | 1 (<1%)                     | 1 (<1%)                            |
| BACLOFEN                       | 0                 | 0                           | 1 (<1%)                            |
| DICLOFENAC SODIUM              | 0                 | 1 (<1%)                     | 0                                  |
| DICLOFENAC                     | 1 (1%)            | 0                           | 0                                  |
| HYDROXYETHYLPYRROLIDINE        |                   |                             |                                    |
| FEBUXOSTAT                     | 0                 | 0                           | 1 (<1%)                            |
| GLUCOSAMINE HYDROCHLORIDE      | 0                 | 1 (<1%)                     | 0                                  |
| HYALURONIC ACID                | 1 (1%)            | 0                           | 0                                  |
| INDOMETACIN                    | 0                 | 0                           | 1 (<1%)                            |
| KETOROLAC TROMETAMOL           | 1 (1%)            | 0                           | 0                                  |
| METAXALONE                     | 1 (1%)            | 0                           | 0                                  |
| PIROXICAM                      | 0                 | 1 (<1%)                     | 0                                  |
| TIZANIDINE HYDROCHLORIDE       | 0                 | 0                           | 1 (<1%)                            |
| ZOLEDRONIC ACID                | 0                 | 0                           | 1 (<1%)                            |
| BLOOD AND BLOOD FORMING ORGANS |                   |                             |                                    |
| Any medication                 | 27 (36%)          | 62 (41%)                    | 63 (45%)                           |
| ACETYLSALICYLIC ACID           | 20 (27%)          | 50 (33%)                    | 50 (36%)                           |
| CLOPIDOGREL BISULFATE          | 3 (4%)            | 9 (6%)                      | 6 (4%)                             |
| CYANOCOBALAMIN                 | 3 (4%)            | 8 (5%)                      | 5 (4%)                             |
| POTASSIUM CHLORIDE             | 3 (4%)            | 6 (4%)                      | 5 (4%)                             |
| FOLIC ACID                     | 1 (1%)            | 3 (2%)                      | 2 (1%)                             |
| POTASSIUM NOS                  | 1 (1%)            | 3 (2%)                      | 2 (1%)                             |
| FERROUS SULPHATE               | 1 (1%)            | 0                           | 4 (3%)                             |

Note: A medication may be included in more than one ATC Level category and appear more than once.  
Note: The following ingredient terms, which do not have associated ATC Level 1 terms, were also used during Treatment with the following frequencies: Bovine Prostate: SAL 50mcg-1 subject, <1%, Capsicum Annuum: SAL 50mcg-1 subject, <1%, Dextroamphetamine Saccharate: Placebo-1 subject, 1%, Lactoperoxidase: Placebo-1 subject, 1%, and Zinc Arginate: SAL 50mcg-1 subject, <1%.  
dln73797: /arenv/arprod/ccil18781\_gr33343/asq112989/final/drivers/cm\_t005\_noncopddur.sas 24AUG2010 15:59

Protocol: ASQ112989  
 Population: Modified Intent-to-treat

Page 14 of 24

Table 1.24  
 Summary of Non-COPD Medications Taken During Treatment

| ATC Level 1<br>Ingredient              | Placebo<br>(N=75) | SAL 50mcg<br>BID<br>(N=151) | FSC<br>250/50mcg<br>BID<br>(N=139) |
|----------------------------------------|-------------------|-----------------------------|------------------------------------|
| DIPYRIDAMOLE                           | 2 (3%)            | 2 (1%)                      | 0                                  |
| WARFARIN SODIUM                        | 0                 | 2 (1%)                      | 2 (1%)                             |
| ENOXAPARIN SODIUM                      | 1 (1%)            | 2 (1%)                      | 0                                  |
| WARFARIN                               | 0                 | 2 (1%)                      | 1 (<1%)                            |
| SODIUM CHLORIDE                        | 1 (1%)            | 1 (<1%)                     | 0                                  |
| CILOSTAZOL                             | 0                 | 0                           | 1 (<1%)                            |
| FERROUS GLUCONATE                      | 0                 | 0                           | 1 (<1%)                            |
| GLUCOSE OXIDASE                        | 1 (1%)            | 0                           | 0                                  |
| IRON                                   | 0                 | 1 (<1%)                     | 0                                  |
| SODIUM BICARBONATE                     | 0                 | 0                           | 1 (<1%)                            |
| GENITO URINARY SYSTEM AND SEX HORMONES |                   |                             |                                    |
| Any medication                         | 25 (33%)          | 41 (27%)                    | 40 (29%)                           |
| IBUPROFEN                              | 9 (12%)           | 22 (15%)                    | 15 (11%)                           |
| NAPROXEN SODIUM                        | 7 (9%)            | 5 (3%)                      | 6 (4%)                             |
| NAPROXEN                               | 4 (5%)            | 4 (3%)                      | 5 (4%)                             |
| TAMSULOSIN HYDROCHLORIDE               | 1 (1%)            | 1 (<1%)                     | 3 (2%)                             |
| ESTRADIOL                              | 1 (1%)            | 2 (1%)                      | 1 (<1%)                            |
| TERAZOSIN                              | 2 (3%)            | 1 (<1%)                     | 1 (<1%)                            |
| DIMETHYL SULFONE                       | 0                 | 2 (1%)                      | 1 (<1%)                            |
| DOXAZOSIN MESILATE                     | 2 (3%)            | 0                           | 1 (<1%)                            |
| DUTASTERIDE                            | 0                 | 1 (<1%)                     | 2 (1%)                             |
| FINASTERIDE                            | 2 (3%)            | 1 (<1%)                     | 0                                  |
| SERENOA REPENS                         | 0                 | 1 (<1%)                     | 2 (1%)                             |
| TOLTERODINE TARTRATE                   | 0                 | 2 (1%)                      | 1 (<1%)                            |

Note: A medication may be included in more than one ATC Level category and appear more than once.  
 Note: The following ingredient terms, which do not have associated ATC Level 1 terms, were also used during Treatment with the following frequencies: Bovine Prostate: SAL 50mcg-1 subject, <1%, Capsicum Annum: SAL 50mcg-1 subject, <1%, Dextroamphetamine Saccharate: Placebo-1 subject, 1%, Lactoperoxidase: Placebo-1 subject, 1%, and Zinc Arginate: SAL 50mcg-1 subject, <1%.  
 dln73797: /arenv/arprod/ccil18781\_gr33343/asq112989/final/drivers/cm\_t005\_noncopddur.sas 24AUG2010 15:59

139

CONFIDENTIAL

ASQ112989

Protocol: ASQ112989  
Population: Modified Intent-to-treat

Page 15 of 24

Table 1.24  
Summary of Non-COPD Medications Taken During Treatment

| ATC Level 1<br>Ingredient        | Placebo<br>(N=75) | SAL 50mcg<br>BID<br>(N=151) | FSC<br>250/50mcg<br>BID<br>(N=139) |
|----------------------------------|-------------------|-----------------------------|------------------------------------|
| ALFUZOSIN HYDROCHLORIDE          | 0                 | 1 (<1%)                     | 1 (<1%)                            |
| COPPER                           | 0                 | 2 (1%)                      | 0                                  |
| ESTROGENS CONJUGATED             | 0                 | 0                           | 2 (1%)                             |
| METRONIDAZOLE                    | 1 (1%)            | 1 (<1%)                     | 0                                  |
| OXYBUTYNIN HYDROCHLORIDE         | 0                 | 0                           | 2 (1%)                             |
| SILDENAFIL CITRATE               | 0                 | 2 (1%)                      | 0                                  |
| TADALAFIL                        | 1 (1%)            | 0                           | 1 (<1%)                            |
| TERAZOSIN HYDROCHLORIDE          | 1 (1%)            | 0                           | 1 (<1%)                            |
| CLINDAMYCIN                      | 0                 | 1 (<1%)                     | 0                                  |
| CLOTRIMAZOLE                     | 0                 | 0                           | 1 (<1%)                            |
| DOXAZOSIN                        | 1 (1%)            | 0                           | 0                                  |
| KETOCONAZOLE                     | 0                 | 0                           | 1 (<1%)                            |
| MAGNESIUM HYDROXIDE              | 0                 | 1 (<1%)                     | 0                                  |
| METHYLTHIONINIUM CHLORIDE        | 1 (1%)            | 0                           | 0                                  |
| NORETHISTERONE ACETATE           | 0                 | 0                           | 1 (<1%)                            |
| PHENAZOPYRIDINE<br>HYDROCHLORIDE | 0                 | 1 (<1%)                     | 0                                  |
| PHENYL SALICYLATE                | 1 (1%)            | 0                           | 0                                  |
| RALOXIFENE HYDROCHLORIDE         | 1 (1%)            | 0                           | 0                                  |
| SILODOSIN                        | 1 (1%)            | 0                           | 0                                  |
| SODIUM PHOSPHATE MONOBASIC       | 1 (1%)            | 0                           | 0                                  |
| SOLIFENACIN SUCCINATE            | 0                 | 1 (<1%)                     | 0                                  |
| TAMSULOSIN                       | 1 (1%)            | 0                           | 0                                  |
| VARDENAFIL                       | 0                 | 0                           | 1 (<1%)                            |

## RESPIRATORY SYSTEM

Note: A medication may be included in more than one ATC Level category and appear more than once.  
Note: The following ingredient terms, which do not have associated ATC Level 1 terms, were also used during Treatment with the following frequencies: Bovine Prostate: SAL 50mcg-1 subject, <1%, Capsicum Annum: SAL 50mcg-1 subject, <1%, Dextroamphetamine Saccharate: Placebo-1 subject, 1%, Lactoperoxidase: Placebo-1 subject, 1%, and Zinc Arginate: SAL 50mcg-1 subject, <1%.  
dln73797: /arenv/arprod/ccil8781\_gr33343/asq112989/final/drivers/cm\_t005\_noncopddur.sas 24AUG2010 15:59



Protocol: ASQ112989  
Population: Modified Intent-to-treat

Page 16 of 24

Table 1.24  
Summary of Non-COPD Medications Taken During Treatment

| ATC Level 1<br>Ingredient        | Placebo<br>(N=75) | SAL 50mcg<br>BID<br>(N=151) | FSC<br>250/50mcg<br>BID<br>(N=139) |
|----------------------------------|-------------------|-----------------------------|------------------------------------|
| Any medication                   | 13 (17%)          | 47 (31%)                    | 34 (24%)                           |
| HYDROCODONE BITARTRATE           | 3 (4%)            | 17 (11%)                    | 12 (9%)                            |
| HYDROCODONE                      | 2 (3%)            | 7 (5%)                      | 3 (2%)                             |
| GUAIFENESIN                      | 1 (1%)            | 2 (1%)                      | 4 (3%)                             |
| BENADRYL (NOS)                   | 0                 | 2 (1%)                      | 3 (2%)                             |
| LORATADINE                       | 1 (1%)            | 3 (2%)                      | 1 (<1%)                            |
| DIPHENHYDRAMINE                  | 1 (1%)            | 1 (<1%)                     | 2 (1%)                             |
| PROMETHAZINE                     | 2 (3%)            | 2 (1%)                      | 0                                  |
| CETIRIZINE                       | 0                 | 1 (<1%)                     | 2 (1%)                             |
| CETIRIZINE HYDROCHLORIDE         | 1 (1%)            | 1 (<1%)                     | 1 (<1%)                            |
| DIPHENHYDRAMINE<br>HYDROCHLORIDE | 0                 | 3 (2%)                      | 0                                  |
| OXYGEN                           | 0                 | 1 (<1%)                     | 2 (1%)                             |
| PHENYLEPHRINE HYDROCHLORIDE      | 1 (1%)            | 0                           | 2 (1%)                             |
| BENZOCAINE                       | 0                 | 1 (<1%)                     | 1 (<1%)                            |
| CHLORPHENAMINE MALEATE           | 0                 | 1 (<1%)                     | 1 (<1%)                            |
| FEXOFENADINE                     | 1 (1%)            | 0                           | 1 (<1%)                            |
| FEXOFENADINE HYDROCHLORIDE       | 0                 | 2 (1%)                      | 0                                  |
| FLUTICASONE PROPIONATE           | 0                 | 1 (<1%)                     | 1 (<1%)                            |
| LIDOCAINE                        | 0                 | 2 (1%)                      | 0                                  |
| SODIUM CHLORIDE                  | 1 (1%)            | 1 (<1%)                     | 0                                  |
| ACETYLCYSTEINE                   | 0                 | 1 (<1%)                     | 0                                  |
| ATROPINE SULFATE                 | 0                 | 1 (<1%)                     | 0                                  |
| BENZONATATE                      | 0                 | 0                           | 1 (<1%)                            |
| CHLORPHENAMINE                   | 0                 | 0                           | 1 (<1%)                            |
| CICLESONIDE                      | 0                 | 0                           | 1 (<1%)                            |

Note: A medication may be included in more than one ATC Level category and appear more than once.

Note: The following ingredient terms, which do not have associated ATC Level 1 terms, were also used during Treatment with the following frequencies: Bovine Prostate: SAL 50mcg-1 subject, <1%, Capsicum Annum: SAL 50mcg-1 subject, <1%, Dextroamphetamine Saccharate: Placebo-1 subject, 1%, Lactoperoxidase: Placebo-1 subject, 1%, and Zinc Arginate: SAL 50mcg-1 subject, <1%.

dln73797: /arenv/arprod/ccil18781\_gr33343/asq112989/final/drivers/cm\_t005\_noncopddur.sas 24AUG2010 15:59

141

CONFIDENTIAL

ASQ112989

Protocol: ASQ112989  
Population: Modified Intent-to-treat

Page 17 of 24

Table 1.24  
Summary of Non-COPD Medications Taken During Treatment

| ATC Level 1<br>Ingredient        | Placebo<br>(N=75) | SAL 50mcg<br>BID<br>(N=151) | FSC<br>250/50mcg<br>BID<br>(N=139) |
|----------------------------------|-------------------|-----------------------------|------------------------------------|
| COCAINE                          | 0                 | 0                           | 1 (<1%)                            |
| CODEINE                          | 0                 | 0                           | 1 (<1%)                            |
| CODEINE PHOSPHATE                | 0                 | 1 (<1%)                     | 0                                  |
| DIPHENHYDRAMINE CITRATE          | 0                 | 1 (<1%)                     | 0                                  |
| LEVOCETIRIZINE HYDROCHLORIDE     | 0                 | 1 (<1%)                     | 0                                  |
| LIDOCAINE HYDROCHLORIDE          | 0                 | 1 (<1%)                     | 0                                  |
| MECLOZINE                        | 0                 | 1 (<1%)                     | 0                                  |
| MONTELUKAST SODIUM               | 0                 | 1 (<1%)                     | 0                                  |
| OXYMETAZOLINE HYDROCHLORIDE      | 0                 | 1 (<1%)                     | 0                                  |
| PHENYLEPHRINE                    | 0                 | 0                           | 1 (<1%)                            |
| PROMETHAZINE HYDROCHLORIDE       | 0                 | 1 (<1%)                     | 0                                  |
| PSEUDOEPHEDRINE                  | 0                 | 0                           | 1 (<1%)                            |
| RETINOL                          | 0                 | 1 (<1%)                     | 0                                  |
| SUDAFED (NOS)                    | 0                 | 1 (<1%)                     | 0                                  |
| TYLENOL COLD NOS                 | 0                 | 1 (<1%)                     | 0                                  |
| DERMATOLOGICALS                  |                   |                             |                                    |
| Any medication                   | 13 (17%)          | 24 (16%)                    | 15 (11%)                           |
| GLYCERYL TRINITRATE              | 1 (1%)            | 6 (4%)                      | 1 (<1%)                            |
| TOCOPHEROL                       | 2 (3%)            | 4 (3%)                      | 2 (1%)                             |
| BENADRYL (NOS)                   | 0                 | 2 (1%)                      | 3 (2%)                             |
| DIPHENHYDRAMINE                  | 1 (1%)            | 1 (<1%)                     | 2 (1%)                             |
| PROMETHAZINE                     | 2 (3%)            | 2 (1%)                      | 0                                  |
| DIPHENHYDRAMINE<br>HYDROCHLORIDE | 0                 | 3 (2%)                      | 0                                  |
| FINASTERIDE                      | 2 (3%)            | 1 (<1%)                     | 0                                  |

Note: A medication may be included in more than one ATC Level category and appear more than once.  
Note: The following ingredient terms, which do not have associated ATC Level 1 terms, were also used during Treatment with the following frequencies: Bovine Prostate: SAL 50mcg-1 subject, <1%, Capsicum Annum: SAL 50mcg-1 subject, <1%, Dextroamphetamine Saccharate: Placebo-1 subject, 1%, Lactoperoxidase: Placebo-1 subject, 1%, and Zinc Arginate: SAL 50mcg-1 subject, <1%.  
dln73797: /arenv/arprod/ccil18781\_gr33343/asq112989/final/drivers/cm\_t005\_noncopddur.sas 24AUG2010 15:59

142

CONFIDENTIAL

ASQ112989

Protocol: ASQ112989  
 Population: Modified Intent-to-treat

Page 18 of 24

Table 1.24  
 Summary of Non-COPD Medications Taken During Treatment

| ATC Level 1<br>Ingredient  | Placebo<br>(N=75) | SAL 50mcg<br>BID<br>(N=151) | FSC<br>250/50mcg<br>BID<br>(N=139) |
|----------------------------|-------------------|-----------------------------|------------------------------------|
| ACYCLOVIR                  | 0                 | 1 (<1%)                     | 1 (<1%)                            |
| BENZOCAINE                 | 0                 | 1 (<1%)                     | 1 (<1%)                            |
| BETACAROTENE               | 0                 | 2 (1%)                      | 0                                  |
| FLUTICASONE PROPIONATE     | 0                 | 1 (<1%)                     | 1 (<1%)                            |
| HYDROCORTISONE             | 0                 | 2 (1%)                      | 0                                  |
| LIDOCAINE                  | 0                 | 2 (1%)                      | 0                                  |
| METRONIDAZOLE              | 1 (1%)            | 1 (<1%)                     | 0                                  |
| SELENIUM                   | 0                 | 1 (<1%)                     | 1 (<1%)                            |
| ZINC OXIDE                 | 0                 | 2 (1%)                      | 0                                  |
| AMINO BENZOIC ACID         | 0                 | 0                           | 1 (<1%)                            |
| CLINDAMYCIN                | 0                 | 1 (<1%)                     | 0                                  |
| CLOTRIMAZOLE               | 0                 | 0                           | 1 (<1%)                            |
| COCAINE                    | 0                 | 0                           | 1 (<1%)                            |
| DIPHENHYDRAMINE CITRATE    | 0                 | 1 (<1%)                     | 0                                  |
| FLUCONAZOLE                | 1 (1%)            | 0                           | 0                                  |
| HYALURONIC ACID            | 1 (1%)            | 0                           | 0                                  |
| HYDROCORTISONE VALERATE    | 0                 | 1 (<1%)                     | 0                                  |
| KETOCONAZOLE               | 0                 | 0                           | 1 (<1%)                            |
| LIDOCAINE HYDROCHLORIDE    | 0                 | 1 (<1%)                     | 0                                  |
| LYSOZYME                   | 1 (1%)            | 0                           | 0                                  |
| PHENYL SALICYLATE          | 1 (1%)            | 0                           | 0                                  |
| PROMETHAZINE HYDROCHLORIDE | 0                 | 1 (<1%)                     | 0                                  |
| RETINOL                    | 0                 | 1 (<1%)                     | 0                                  |
| TETRACAINE HYDROCHLORIDE   | 0                 | 0                           | 1 (<1%)                            |
| TETRACYCLINE               | 1 (1%)            | 0                           | 0                                  |

Note: A medication may be included in more than one ATC Level category and appear more than once.  
 Note: The following ingredient terms, which do not have associated ATC Level 1 terms, were also used during Treatment with the following frequencies: Bovine Prostate: SAL 50mcg-1 subject, <1%, Capsicum Annum: SAL 50mcg-1 subject, <1%, Dextroamphetamine Saccharate: Placebo-1 subject, 1%, Lactoperoxidase: Placebo-1 subject, 1%, and Zinc Arginate: SAL 50mcg-1 subject, <1%.  
 dln73797: /arenv/arprod/ccil18781\_gr33343/asq112989/final/drivers/cm\_t005\_noncopddur.sas 24AUG2010 15:59

143

CONFIDENTIAL

ASQ112989

Protocol: ASQ112989  
Population: Modified Intent-to-treat

Page 19 of 24

Table 1.24  
Summary of Non-COPD Medications Taken During Treatment

| ATC Level 1<br>Ingredient   | Placebo<br>(N=75) | SAL 50mcg<br>BID<br>(N=151) | FSC<br>250/50mcg<br>BID<br>(N=139) |
|-----------------------------|-------------------|-----------------------------|------------------------------------|
| SENSORY ORGANS              |                   |                             |                                    |
| Any medication              | 10 (13%)          | 19 (13%)                    | 15 (11%)                           |
| CLONIDINE                   | 1 (1%)            | 4 (3%)                      | 5 (4%)                             |
| PHENYLEPHRINE HYDROCHLORIDE | 1 (1%)            | 0                           | 2 (1%)                             |
| ACYCLOVIR                   | 0                 | 1 (<1%)                     | 1 (<1%)                            |
| CLONIDINE HYDROCHLORIDE     | 0                 | 1 (<1%)                     | 1 (<1%)                            |
| DICLOFENAC                  | 1 (1%)            | 1 (<1%)                     | 0                                  |
| HYDROCORTISONE              | 0                 | 2 (1%)                      | 0                                  |
| LATANOPROST                 | 1 (1%)            | 1 (<1%)                     | 0                                  |
| LIDOCAINE                   | 0                 | 2 (1%)                      | 0                                  |
| SODIUM CHLORIDE             | 1 (1%)            | 1 (<1%)                     | 0                                  |
| ACETYLCYSTEINE              | 0                 | 1 (<1%)                     | 0                                  |
| ATROPINE SULFATE            | 0                 | 1 (<1%)                     | 0                                  |
| BENZYLPENICILLIN            | 0                 | 0                           | 1 (<1%)                            |
| BRIMONIDINE TARTRATE        | 0                 | 1 (<1%)                     | 0                                  |
| CIPROFLOXACIN               | 0                 | 1 (<1%)                     | 0                                  |
| CIPROFLOXACIN HYDROCHLORIDE | 1 (1%)            | 0                           | 0                                  |
| COCAINE                     | 0                 | 0                           | 1 (<1%)                            |
| CORTISONE                   | 0                 | 1 (<1%)                     | 0                                  |
| DICLOFENAC SODIUM           | 0                 | 1 (<1%)                     | 0                                  |
| DICLOFENAC                  | 1 (1%)            | 0                           | 0                                  |
| HYDROXYETHYLPYRROLIDINE     | 0                 | 0                           | 0                                  |
| HYALURONIC ACID             | 1 (1%)            | 0                           | 0                                  |
| HYOSCINE HYDROBROMIDE       | 0                 | 1 (<1%)                     | 0                                  |
| INDOMETACIN                 | 0                 | 0                           | 1 (<1%)                            |
| INTERFERON BETA             | 0                 | 0                           | 1 (<1%)                            |

Note: A medication may be included in more than one ATC Level category and appear more than once.

Note: The following ingredient terms, which do not have associated ATC Level 1 terms, were also used during Treatment with the following frequencies: Bovine Prostate: SAL 50mcg-1 subject, <1%, Capsicum Annum: SAL 50mcg-1 subject, <1%, Dextroamphetamine Saccharate: Placebo-1 subject, 1%, Lactoperoxidase: Placebo-1 subject, 1%, and Zinc Arginate: SAL 50mcg-1 subject, <1%.

dln73797: /arenv/arprod/ccil18781\_gr33343/asq112989/final/drivers/cm\_t005\_noncopddur.sas 24AUG2010 15:59

144

CONFIDENTIAL

ASQ112989

Protocol: ASQ112989

Page 20 of 24

Population: Modified Intent-to-treat

Table 1.24  
Summary of Non-COPD Medications Taken During Treatment

| ATC Level 1<br>Ingredient                                             | Placebo<br>(N=75) | SAL 50mcg<br>BID<br>(N=151) | FSC<br>250/50mcg<br>BID<br>(N=139) |
|-----------------------------------------------------------------------|-------------------|-----------------------------|------------------------------------|
| ISOSORBIDE                                                            | 1 (1%)            | 0                           | 0                                  |
| KETOROLAC TROMETAMOL                                                  | 1 (1%)            | 0                           | 0                                  |
| LIDOCAINE HYDROCHLORIDE                                               | 0                 | 1 (<1%)                     | 0                                  |
| OPTIVE (NOS)                                                          | 0                 | 0                           | 1 (<1%)                            |
| OXYMETAZOLINE HYDROCHLORIDE                                           | 0                 | 1 (<1%)                     | 0                                  |
| PHENYLEPHRINE                                                         | 0                 | 0                           | 1 (<1%)                            |
| PIROXICAM                                                             | 0                 | 1 (<1%)                     | 0                                  |
| RETINOL                                                               | 0                 | 1 (<1%)                     | 0                                  |
| TETRACAINE HYDROCHLORIDE                                              | 0                 | 0                           | 1 (<1%)                            |
| TETRACYCLINE                                                          | 1 (1%)            | 0                           | 0                                  |
| TIMOLOL                                                               | 0                 | 1 (<1%)                     | 0                                  |
| TIMOLOL MALEATE                                                       | 1 (1%)            | 0                           | 0                                  |
| SYSTEMIC HORMONAL<br>PREPARATIONS, EXCL. SEX<br>HORMONES AND INSULINS |                   |                             |                                    |
| Any medication                                                        | 5 (7%)            | 16 (11%)                    | 10 (7%)                            |
| LEVOTHYROXINE SODIUM                                                  | 3 (4%)            | 5 (3%)                      | 5 (4%)                             |
| LEVOTHYROXINE                                                         | 1 (1%)            | 8 (5%)                      | 3 (2%)                             |
| HYDROCORTISONE                                                        | 0                 | 2 (1%)                      | 0                                  |
| CALCITONIN, SALMON                                                    | 1 (1%)            | 0                           | 0                                  |
| CORTISONE                                                             | 0                 | 1 (<1%)                     | 0                                  |
| HYDROCORTISONE VALERATE                                               | 0                 | 1 (<1%)                     | 0                                  |
| MELATONIN                                                             | 0                 | 1 (<1%)                     | 0                                  |
| PREDNISONE                                                            | 0                 | 0                           | 1 (<1%)                            |
| THIAMAZOLE                                                            | 0                 | 0                           | 1 (<1%)                            |

Note: A medication may be included in more than one ATC Level category and appear more than once.

Note: The following ingredient terms, which do not have associated ATC Level 1 terms, were also used during Treatment with the following frequencies: Bovine Prostate: SAL 50mcg-1 subject, <1%, Capsicum Annum: SAL 50mcg-1 subject, <1%, Dextroamphetamine Saccharate: Placebo-1 subject, 1%, Lactoperoxidase: Placebo-1 subject, 1%, and Zinc Arginate: SAL 50mcg-1 subject, <1%.

dln73797: /arenv/arprod/ccil8781\_gr33343/asq112989/final/drivers/cm\_t005\_noncopddur.sas 24AUG2010 15:59

145

CONFIDENTIAL

ASQ112989

Protocol: ASQ112989  
Population: Modified Intent-to-treat

Page 21 of 24

Table 1.24  
Summary of Non-COPD Medications Taken During Treatment

| ATC Level 1<br>Ingredient       | Placebo<br>(N=75) | SAL 50mcg<br>BID<br>(N=151) | FSC<br>250/50mcg<br>BID<br>(N=139) |
|---------------------------------|-------------------|-----------------------------|------------------------------------|
| -----                           |                   |                             |                                    |
| ANTIINFECTIVES FOR SYSTEMIC USE |                   |                             |                                    |
| Any medication                  | 9 (12%)           | 10 (7%)                     | 7 (5%)                             |
| AMOXICILLIN                     | 2 (3%)            | 3 (2%)                      | 0                                  |
| DOXYCYCLINE                     | 2 (3%)            | 2 (1%)                      | 0                                  |
| ACYCLOVIR                       | 0                 | 1 (<1%)                     | 1 (<1%)                            |
| METRONIDAZOLE                   | 1 (1%)            | 1 (<1%)                     | 0                                  |
| MOXIFLOXACIN                    | 1 (1%)            | 1 (<1%)                     | 0                                  |
| PNEUMOCOCCAL VACCINE            | 0                 | 2 (1%)                      | 0                                  |
| BENZYL PENICILLIN               | 0                 | 0                           | 1 (<1%)                            |
| CEFALEXIN                       | 0                 | 0                           | 1 (<1%)                            |
| CILASTATIN SODIUM               | 0                 | 1 (<1%)                     | 0                                  |
| CIPROFLOXACIN                   | 0                 | 1 (<1%)                     | 0                                  |
| CIPROFLOXACIN HYDROCHLORIDE     | 1 (1%)            | 0                           | 0                                  |
| CLINDAMYCIN                     | 0                 | 1 (<1%)                     | 0                                  |
| EFAVIRENZ                       | 0                 | 1 (<1%)                     | 0                                  |
| EMTRICITABINE                   | 0                 | 1 (<1%)                     | 0                                  |
| FLUCONAZOLE                     | 1 (1%)            | 0                           | 0                                  |
| H1N1 INFLUENZA VACCINE          | 1 (1%)            | 0                           | 0                                  |
| IMIPENEM                        | 0                 | 1 (<1%)                     | 0                                  |
| IMMUNOGLOBULINS NOS             | 0                 | 0                           | 1 (<1%)                            |
| INFLUENZA VACCINE               | 0                 | 1 (<1%)                     | 0                                  |
| KETOCONAZOLE                    | 0                 | 0                           | 1 (<1%)                            |
| LYSOZYME                        | 1 (1%)            | 0                           | 0                                  |
| METHENAMINE                     | 1 (1%)            | 0                           | 0                                  |

Note: A medication may be included in more than one ATC Level category and appear more than once.

Note: The following ingredient terms, which do not have associated ATC Level 1 terms, were also used during Treatment with the following frequencies: Bovine Prostate: SAL 50mcg-1 subject, <1%, Capsicum Annum: SAL 50mcg-1 subject, <1%, Dextroamphetamine Saccharate: Placebo-1 subject, 1%, Lactoperoxidase: Placebo-1 subject, 1%, and Zinc Arginate: SAL 50mcg-1 subject, <1%.

dln73797: /arenv/arprod/ccil18781\_gr33343/asq112989/final/drivers/cm\_t005\_noncopddur.sas 24AUG2010 15:59

146

CONFIDENTIAL

ASQ112989

Protocol: ASQ112989

Page 22 of 24

Population: Modified Intent-to-treat

Table 1.24  
Summary of Non-COPD Medications Taken During Treatment

| ATC Level 1<br>Ingredient        | Placebo<br>(N=75) | SAL 50mcg<br>BID<br>(N=151) | FSC<br>250/50mcg<br>BID<br>(N=139) |
|----------------------------------|-------------------|-----------------------------|------------------------------------|
| SULFAMETHOXAZOLE                 | 0                 | 1 (<1%)                     | 0                                  |
| TENOFOVIR DISOPROXIL<br>FUMARATE | 0                 | 1 (<1%)                     | 0                                  |
| TETRACYCLINE                     | 1 (1%)            | 0                           | 0                                  |
| TRIMETHOPRIM                     | 0                 | 1 (<1%)                     | 0                                  |
| VALACICLOVIR HYDROCHLORIDE       | 0                 | 0                           | 1 (<1%)                            |
| VANCOMYCIN                       | 0                 | 0                           | 1 (<1%)                            |
| VARIOUS                          |                   |                             |                                    |
| Any medication                   | 7 (9%)            | 9 (6%)                      | 9 (6%)                             |
| CHONDROITIN                      | 1 (1%)            | 2 (1%)                      | 2 (1%)                             |
| AMBIGUOUS MEDICATION             | 1 (1%)            | 2 (1%)                      | 0                                  |
| DIMETHYL SULFONE                 | 0                 | 2 (1%)                      | 1 (<1%)                            |
| OXYGEN                           | 0                 | 1 (<1%)                     | 2 (1%)                             |
| PLANTAGO OVATA                   | 0                 | 1 (<1%)                     | 2 (1%)                             |
| ALLIUM SATIVUM                   | 0                 | 1 (<1%)                     | 1 (<1%)                            |
| CINNAMOMUM VERUM                 | 0                 | 0                           | 2 (1%)                             |
| ECHINACEA                        | 0                 | 1 (<1%)                     | 1 (<1%)                            |
| HERBALS NOS                      | 0                 | 2 (1%)                      | 0                                  |
| MONASCUS PURPUREUS               | 1 (1%)            | 0                           | 1 (<1%)                            |
| ACETYLCYSTEINE                   | 0                 | 1 (<1%)                     | 0                                  |
| ANTIOXIDANTS NOS                 | 0                 | 1 (<1%)                     | 0                                  |
| EUGENIA CARYOPHYLLATA            | 0                 | 1 (<1%)                     | 0                                  |
| GLUCOSE OXIDASE                  | 1 (1%)            | 0                           | 0                                  |
| HERBAL EXTRACTS NOS              | 0                 | 1 (<1%)                     | 0                                  |
| HYDRASTIS CANADENSIS             | 0                 | 1 (<1%)                     | 0                                  |

Note: A medication may be included in more than one ATC Level category and appear more than once.

Note: The following ingredient terms, which do not have associated ATC Level 1 terms, were also used during Treatment with the following frequencies: Bovine Prostate: SAL 50mcg-1 subject, <1%, Capsicum Annum: SAL 50mcg-1 subject, <1%, Dextroamphetamine Saccharate: Placebo-1 subject, 1%, Lactoperoxidase: Placebo-1 subject, 1%, and Zinc Arginate: SAL 50mcg-1 subject, <1%.

dln73797: /arenv/arprod/ccil18781\_gr33343/asq112989/final/drivers/cm\_t005\_noncopddur.sas 24AUG2010 15:59

147

CONFIDENTIAL

ASQ112989

Protocol: ASQ112989  
Population: Modified Intent-to-treat

Page 23 of 24

Table 1.24  
Summary of Non-COPD Medications Taken During Treatment

| ATC Level 1<br>Ingredient                              | Placebo<br>(N=75) | SAL 50mcg<br>BID<br>(N=151) | FSC<br>250/50mcg<br>BID<br>(N=139) |
|--------------------------------------------------------|-------------------|-----------------------------|------------------------------------|
| LACTOFERRIN                                            | 1 (1%)            | 0                           | 0                                  |
| LINUM USITATISSIMUM OIL                                | 0                 | 0                           | 1 (<1%)                            |
| MEDICAGO SATIVA                                        | 0                 | 1 (<1%)                     | 0                                  |
| MEDICATION UNKNOWN                                     | 1 (1%)            | 0                           | 0                                  |
| METHIONINE                                             | 0                 | 1 (<1%)                     | 0                                  |
| METHYLTHIONINIUM CHLORIDE                              | 1 (1%)            | 0                           | 0                                  |
| NALOXONE HYDROCHLORIDE                                 | 0                 | 0                           | 1 (<1%)                            |
| OENOTHERA BIENNIS OIL                                  | 0                 | 0                           | 1 (<1%)                            |
| PHYTOSTEROL (NOS)                                      | 1 (1%)            | 0                           | 0                                  |
| SOYA LECITHIN                                          | 0                 | 1 (<1%)                     | 0                                  |
| VITIS VINIFERA EXTRACT                                 | 0                 | 0                           | 1 (<1%)                            |
| ZEA MAYS                                               | 0                 | 1 (<1%)                     | 0                                  |
| ANTINEOPLASTIC AND<br>IMMUNOMODULATING AGENTS          |                   |                             |                                    |
| Any medication                                         | 2 (3%)            | 4 (3%)                      | 6 (4%)                             |
| ESTRADIOL                                              | 1 (1%)            | 2 (1%)                      | 1 (<1%)                            |
| ESTROGENS CONJUGATED                                   | 0                 | 0                           | 2 (1%)                             |
| TAMOXIFEN                                              | 0                 | 1 (<1%)                     | 1 (<1%)                            |
| BEVACIZUMAB                                            | 0                 | 0                           | 1 (<1%)                            |
| CICLOSPORIN                                            | 0                 | 1 (<1%)                     | 0                                  |
| INTERFERON BETA                                        | 0                 | 0                           | 1 (<1%)                            |
| RALOXIFENE HYDROCHLORIDE                               | 1 (1%)            | 0                           | 0                                  |
| ANTIPARASITIC PRODUCTS,<br>INSECTICIDES AND REPELLENTS |                   |                             |                                    |

Note: A medication may be included in more than one ATC Level category and appear more than once.  
Note: The following ingredient terms, which do not have associated ATC Level 1 terms, were also used during Treatment with the following frequencies: Bovine Prostate: SAL 50mcg-1 subject, <1%, Capsicum Annum: SAL 50mcg-1 subject, <1%, Dextroamphetamine Saccharate: Placebo-1 subject, 1%, Lactoperoxidase: Placebo-1 subject, 1%, and Zinc Arginate: SAL 50mcg-1 subject, <1%.  
dln73797: /arenv/arprod/ccil8781\_gr33343/asq112989/final/drivers/cm\_t005\_noncopddur.sas 24AUG2010 15:59



Protocol: ASQ112989  
 Population: Modified Intent-to-treat

Page 24 of 24

Table 1.24  
 Summary of Non-COPD Medications Taken During Treatment

| ATC Level 1<br>Ingredient | Placebo<br>(N=75) | SAL 50mcg<br>BID<br>(N=151) | FSC<br>250/50mcg<br>BID<br>(N=139) |
|---------------------------|-------------------|-----------------------------|------------------------------------|
| Any medication            | 1 (1%)            | 1 (<1%)                     | 0                                  |
| METRONIDAZOLE             | 1 (1%)            | 1 (<1%)                     | 0                                  |

149

CONFIDENTIAL

ASQ112989

Note: A medication may be included in more than one ATC Level category and appear more than once.  
 Note: The following ingredient terms, which do not have associated ATC Level 1 terms, were also used during Treatment with the following frequencies: Bovine Prostate: SAL 50mcg-1 subject, <1%, Capsicum Annum: SAL 50mcg-1 subject, <1%, Dextroamphetamine Saccharate: Placebo-1 subject, 1%, Lactoperoxidase: Placebo-1 subject, 1%, and Zinc Arginate: SAL 50mcg-1 subject, <1%.  
 dln73797: /arenv/arprod/ccil8781\_gr33343/asq112989/final/drivers/cm\_t005\_noncopddur.sas 24AUG2010 15:59

Protocol: ASQ112989  
Population: Modified Intent-to-treat

Page 1 of 22

Table 1.25  
Summary of Non-COPD Medications Taken Post-Treatment

| ATC Level 1<br>Ingredient | Placebo<br>(N=75) | SAL 50mcg<br>BID<br>(N=151) | FSC<br>250/50mcg<br>BID<br>(N=139) |
|---------------------------|-------------------|-----------------------------|------------------------------------|
| Any medication            | 62 (83%)          | 134 (89%)                   | 126 (91%)                          |
| NERVOUS SYSTEM            |                   |                             |                                    |
| Any medication            | 46 (61%)          | 101 (67%)                   | 97 (70%)                           |
| ACETYLSALICYLIC ACID      | 20 (27%)          | 44 (29%)                    | 48 (35%)                           |
| PARACETAMOL               | 10 (13%)          | 37 (25%)                    | 32 (23%)                           |
| IBUPROFEN                 | 9 (12%)           | 20 (13%)                    | 12 (9%)                            |
| ALPRAZOLAM                | 4 (5%)            | 8 (5%)                      | 9 (6%)                             |
| GABAPENTIN                | 2 (3%)            | 6 (4%)                      | 8 (6%)                             |
| TRAZODONE                 | 2 (3%)            | 3 (2%)                      | 6 (4%)                             |
| HYDROCODONE               | 1 (1%)            | 6 (4%)                      | 3 (2%)                             |
| CLONAZEPAM                | 1 (1%)            | 2 (1%)                      | 6 (4%)                             |
| CLONIDINE                 | 0                 | 4 (3%)                      | 5 (4%)                             |
| DULOXETINE                | 3 (4%)            | 3 (2%)                      | 1 (<1%)                            |
| FLUOXETINE HYDROCHLORIDE  | 2 (3%)            | 2 (1%)                      | 3 (2%)                             |
| LORAZEPAM                 | 1 (1%)            | 2 (1%)                      | 4 (3%)                             |
| SERTRALINE HYDROCHLORIDE  | 0                 | 3 (2%)                      | 4 (3%)                             |
| BUPROPION HYDROCHLORIDE   | 1 (1%)            | 2 (1%)                      | 3 (2%)                             |
| ESCITALOPRAM OXALATE      | 1 (1%)            | 2 (1%)                      | 3 (2%)                             |
| OXYCODONE HYDROCHLORIDE   | 1 (1%)            | 2 (1%)                      | 3 (2%)                             |
| PAROXETINE HYDROCHLORIDE  | 1 (1%)            | 2 (1%)                      | 3 (2%)                             |
| BUPROPION                 | 2 (3%)            | 1 (<1%)                     | 2 (1%)                             |
| CITALOPRAM HYDROBROMIDE   | 1 (1%)            | 2 (1%)                      | 2 (1%)                             |
| DIAZEPAM                  | 0                 | 4 (3%)                      | 1 (<1%)                            |
| TEMAZEPAM                 | 1 (1%)            | 3 (2%)                      | 1 (<1%)                            |
| TRAMADOL HYDROCHLORIDE    | 1 (1%)            | 2 (1%)                      | 2 (1%)                             |

Note: A medication may be included in more than one ATC Level category and appear more than once.

Note: The following ingredient terms, which do not have associated ATC Level 1 terms, were also used during Post-Treatment with the following frequencies: Bovine Prostate: SAL 50mcg-1 subject, <1%, Capsicum Annum: SAL 50mcg-1 subject, <1%, Dextroamphetamine Saccharate: Placebo-1 subject, 1%, Lactoperoxidase: Placebo-1 subject, 1%, and Zinc Arginate: SAL 50mcg-1 subject, <1%.

dln73797: /arenv/arprod/ccil18781\_gr33343/asq112989/final/drivers/cm\_t006\_noncopdpst.sas 24AUG2010 16:04

150

CONFIDENTIAL

ASQ112989

Protocol: ASQ112989  
 Population: Modified Intent-to-treat

Page 2 of 22

Table 1.25  
 Summary of Non-COPD Medications Taken Post-Treatment

| ATC Level 1<br>Ingredient        | Placebo<br>(N=75) | SAL 50mcg<br>BID<br>(N=151) | FSC<br>250/50mcg<br>BID<br>(N=139) |
|----------------------------------|-------------------|-----------------------------|------------------------------------|
| ZOLPIDEM TARTRATE                | 1 (1%)            | 1 (<1%)                     | 3 (2%)                             |
| CYCLOBENZAPRINE<br>HYDROCHLORIDE | 1 (1%)            | 0                           | 3 (2%)                             |
| ROPINIROLE HYDROCHLORIDE         | 0                 | 1 (<1%)                     | 3 (2%)                             |
| VARENICLINE TARTRATE             | 2 (3%)            | 1 (<1%)                     | 1 (<1%)                            |
| VENLAFAXINE HYDROCHLORIDE        | 0                 | 3 (2%)                      | 1 (<1%)                            |
| AMITRIPTYLINE                    | 0                 | 2 (1%)                      | 1 (<1%)                            |
| AMITRIPTYLINE HYDROCHLORIDE      | 0                 | 1 (<1%)                     | 2 (1%)                             |
| ARIPIPRAZOLE                     | 1 (1%)            | 1 (<1%)                     | 1 (<1%)                            |
| CAFFEINE                         | 0                 | 2 (1%)                      | 1 (<1%)                            |
| CITALOPRAM                       | 1 (1%)            | 1 (<1%)                     | 1 (<1%)                            |
| DEXTROPROPOXYPHENE NAPSILATE     | 0                 | 0                           | 3 (2%)                             |
| OLANZAPINE                       | 1 (1%)            | 1 (<1%)                     | 1 (<1%)                            |
| OXYCODONE                        | 0                 | 1 (<1%)                     | 2 (1%)                             |
| PAROXETINE                       | 0                 | 3 (2%)                      | 0                                  |
| PREGABALIN                       | 1 (1%)            | 0                           | 2 (1%)                             |
| SERTRALINE                       | 0                 | 0                           | 3 (2%)                             |
| TRAMADOL                         | 1 (1%)            | 0                           | 2 (1%)                             |
| CAPSAICIN                        | 0                 | 0                           | 2 (1%)                             |
| CLONIDINE HYDROCHLORIDE          | 0                 | 1 (<1%)                     | 1 (<1%)                            |
| CYCLOBENZAPRINE                  | 0                 | 1 (<1%)                     | 1 (<1%)                            |
| ESZOPICLONE                      | 1 (1%)            | 1 (<1%)                     | 0                                  |
| HYDROXYZINE                      | 0                 | 2 (1%)                      | 0                                  |
| HYDROXYZINE HYDROCHLORIDE        | 1 (1%)            | 1 (<1%)                     | 0                                  |
| KETOROLAC TROMETAMOL             | 1 (1%)            | 0                           | 1 (<1%)                            |
| LAMOTRIGINE                      | 0                 | 0                           | 2 (1%)                             |

Note: A medication may be included in more than one ATC Level category and appear more than once.  
 Note: The following ingredient terms, which do not have associated ATC Level 1 terms, were also used during Post-Treatment with the following frequencies: Bovine Prostate: SAL 50mcg-1 subject, <1%, Capsicum Annum: SAL 50mcg-1 subject, <1%, Dextroamphetamine Saccharate: Placebo-1 subject, 1%, Lactoperoxidase: Placebo-1 subject, 1%, and Zinc Arginate: SAL 50mcg-1 subject, <1%.  
 dln73797: /arenv/arprod/ccil8781\_gr33343/asq112989/final/drivers/cm\_t006\_noncopdpst.sas 24AUG2010 16:04

151

CONFIDENTIAL

ASQ112989

Protocol: ASQ112989  
Population: Modified Intent-to-treat

Page 3 of 22

Table 1.25  
Summary of Non-COPD Medications Taken Post-Treatment

| ATC Level 1<br>Ingredient        | Placebo<br>(N=75) | SAL 50mcg<br>BID<br>(N=151) | FSC<br>250/50mcg<br>BID<br>(N=139) |
|----------------------------------|-------------------|-----------------------------|------------------------------------|
| LIDOCAINE                        | 0                 | 2 (1%)                      | 0                                  |
| NICOTINE                         | 0                 | 0                           | 2 (<1%)                            |
| NORTRIPTYLINE                    | 1 (1%)            | 0                           | 1 (<1%)                            |
| QUETIAPINE FUMARATE              | 1 (1%)            | 0                           | 1 (<1%)                            |
| AMFETAMINE ASPARTATE             | 1 (1%)            | 0                           | 0                                  |
| AMFETAMINE SULFATE               | 1 (1%)            | 0                           | 0                                  |
| BECLAMIDE                        | 0                 | 0                           | 1 (<1%)                            |
| BENZODIAZEPINE, NOS              | 0                 | 1 (<1%)                     | 0                                  |
| BETHANECHOL CHLORIDE             | 0                 | 1 (<1%)                     | 0                                  |
| BUPRENORPHINE HYDROCHLORIDE      | 0                 | 0                           | 1 (<1%)                            |
| BUSPIRONE                        | 0                 | 1 (<1%)                     | 0                                  |
| BUSPIRONE HYDROCHLORIDE          | 0                 | 1 (<1%)                     | 0                                  |
| BUTALBITAL                       | 0                 | 0                           | 1 (<1%)                            |
| CARBAMAZEPINE                    | 0                 | 0                           | 1 (<1%)                            |
| COCAINE                          | 0                 | 0                           | 1 (<1%)                            |
| CODEINE                          | 0                 | 0                           | 1 (<1%)                            |
| DEXAMFETAMINE SULFATE            | 1 (1%)            | 0                           | 0                                  |
| DIPOTASSIUM CLORAZEPATE          | 0                 | 0                           | 1 (<1%)                            |
| DOXYLAMINE SUCCINATE             | 0                 | 0                           | 1 (<1%)                            |
| EXCEDRIN (NOS)                   | 0                 | 1 (<1%)                     | 0                                  |
| FLUOXETINE                       | 1 (1%)            | 0                           | 0                                  |
| METHYLPHENIDATE<br>HYDROCHLORIDE | 0                 | 0                           | 1 (<1%)                            |
| MIRTAZAPINE                      | 0                 | 0                           | 1 (<1%)                            |
| MORPHINE                         | 0                 | 0                           | 1 (<1%)                            |
| PHENOBARBITAL                    | 0                 | 1 (<1%)                     | 0                                  |

Note: A medication may be included in more than one ATC Level category and appear more than once.

Note: The following ingredient terms, which do not have associated ATC Level 1 terms, were also used during Post-Treatment with the following frequencies: Bovine Prostate: SAL 50mcg-1 subject, <1%, Capsicum Annum: SAL 50mcg-1 subject, <1%, Dextroamphetamine Saccharate: Placebo-1 subject, 1%, Lactoperoxidase: Placebo-1 subject, 1%, and Zinc Arginate: SAL 50mcg-1 subject, <1%.

dln73797: /arenv/arprod/ccil18781\_gr33343/asq112989/final/drivers/cm\_t006\_noncopdpst.sas 24AUG2010 16:04

152

CONFIDENTIAL

ASQ112989

Protocol: ASQ112989  
 Population: Modified Intent-to-treat

Page 4 of 22

Table 1.25  
 Summary of Non-COPD Medications Taken Post-Treatment

| ATC Level 1<br>Ingredient    | Placebo<br>(N=75) | SAL 50mcg<br>BID<br>(N=151) | FSC<br>250/50mcg<br>BID<br>(N=139) |
|------------------------------|-------------------|-----------------------------|------------------------------------|
| PHENYTOIN                    | 0                 | 1 (<1%)                     | 0                                  |
| PRAMIPEXOLE DIHYDROCHLORIDE  | 0                 | 0                           | 1 (<1%)                            |
| PROCAINE HYDROCHLORIDE       | 0                 | 1 (<1%)                     | 0                                  |
| PROCHLORPERAZINE             | 0                 | 0                           | 1 (<1%)                            |
| PROMETHAZINE                 | 1 (1%)            | 0                           | 0                                  |
| ROPINIROLE                   | 0                 | 0                           | 1 (<1%)                            |
| SULTOPRIDE                   | 1 (1%)            | 0                           | 0                                  |
| TOMEXETINE HYDROCHLORIDE     | 0                 | 0                           | 1 (<1%)                            |
| TRAZODONE HYDROCHLORIDE      | 0                 | 1 (<1%)                     | 0                                  |
| VALPROIC ACID                | 0                 | 0                           | 1 (<1%)                            |
| VENLAFAXINE                  | 1 (1%)            | 0                           | 0                                  |
| <b>CARDIOVASCULAR SYSTEM</b> |                   |                             |                                    |
| Any medication               | 48 (64%)          | 95 (63%)                    | 84 (60%)                           |
| LISINOPRIL                   | 13 (17%)          | 23 (15%)                    | 29 (21%)                           |
| HYDROCHLOROTHIAZIDE          | 7 (9%)            | 24 (16%)                    | 23 (17%)                           |
| SIMVASTATIN                  | 13 (17%)          | 21 (14%)                    | 14 (10%)                           |
| AMLODIPINE BESILATE          | 4 (5%)            | 10 (7%)                     | 9 (6%)                             |
| ATORVASTATIN CALCIUM         | 2 (3%)            | 9 (6%)                      | 10 (7%)                            |
| AMLODIPINE                   | 3 (4%)            | 10 (7%)                     | 7 (5%)                             |
| ATENOLOL                     | 6 (8%)            | 8 (5%)                      | 4 (3%)                             |
| CARVEDILOL                   | 2 (3%)            | 5 (3%)                      | 11 (8%)                            |
| METOPROLOL                   | 3 (4%)            | 10 (7%)                     | 5 (4%)                             |
| FISH OIL                     | 3 (4%)            | 7 (5%)                      | 7 (5%)                             |
| FUROSEMIDE                   | 3 (4%)            | 8 (5%)                      | 6 (4%)                             |
| VALSARTAN                    | 1 (1%)            | 8 (5%)                      | 7 (5%)                             |

Note: A medication may be included in more than one ATC Level category and appear more than once.  
 Note: The following ingredient terms, which do not have associated ATC Level 1 terms, were also used during Post-Treatment with the following frequencies: Bovine Prostate: SAL 50mcg-1 subject, <1%, Capsicum Annuum: SAL 50mcg-1 subject, <1%, Dextroamphetamine Saccharate: Placebo-1 subject, 1%, Lactoperoxidase: Placebo-1 subject, 1%, and Zinc Arginate: SAL 50mcg-1 subject, <1%.  
 dln73797: /arenv/arprod/ccil8781\_gr33343/asq112989/final/drivers/cm\_t006\_noncopdpst.sas 24AUG2010 16:04

153

CONFIDENTIAL

ASQ112989

Protocol: ASQ112989  
Population: Modified Intent-to-treat

Page 5 of 22

Table 1.25  
Summary of Non-COPD Medications Taken Post-Treatment

| ATC Level 1<br>Ingredient    | Placebo<br>(N=75) | SAL 50mcg<br>BID<br>(N=151) | FSC<br>250/50mcg<br>BID<br>(N=139) |
|------------------------------|-------------------|-----------------------------|------------------------------------|
| PRAVASTATIN                  | 5 (7%)            | 6 (4%)                      | 4 (3%)                             |
| OLMESARTAN                   | 2 (3%)            | 9 (6%)                      | 1 (<1%)                            |
| LOVASTATIN                   | 2 (3%)            | 2 (1%)                      | 6 (4%)                             |
| ROSUVASTATIN CALCIUM         | 1 (1%)            | 4 (3%)                      | 5 (4%)                             |
| CLONIDINE                    | 0                 | 4 (3%)                      | 5 (4%)                             |
| FENOFIBRATE                  | 0                 | 4 (3%)                      | 4 (3%)                             |
| EZETIMIBE                    | 2 (3%)            | 4 (3%)                      | 1 (<1%)                            |
| TRIAMTERENE                  | 2 (3%)            | 2 (1%)                      | 3 (2%)                             |
| DIGOXIN                      | 1 (1%)            | 4 (3%)                      | 1 (<1%)                            |
| GEMFIBROZIL                  | 1 (1%)            | 2 (1%)                      | 3 (2%)                             |
| GLYCERYL TRINITRATE          | 1 (1%)            | 4 (3%)                      | 1 (<1%)                            |
| OMEGA-3 MARINE TRIGLYCERIDES | 3 (4%)            | 2 (1%)                      | 1 (<1%)                            |
| ENALAPRIL                    | 0                 | 2 (1%)                      | 3 (2%)                             |
| METOPROLOL TARTRATE          | 0                 | 0                           | 5 (4%)                             |
| NICOTINIC ACID               | 0                 | 2 (1%)                      | 3 (2%)                             |
| UBIDECARENONE                | 1 (1%)            | 2 (1%)                      | 2 (1%)                             |
| BENAZEPRIL                   | 0                 | 3 (2%)                      | 1 (<1%)                            |
| DILTIAZEM                    | 0                 | 4 (3%)                      | 0                                  |
| DILTIAZEM HYDROCHLORIDE      | 0                 | 0                           | 4 (3%)                             |
| IRBESARTAN                   | 0                 | 3 (2%)                      | 1 (<1%)                            |
| METOPROLOL SUCCINATE         | 2 (3%)            | 0                           | 2 (1%)                             |
| NEBIVOLOL HYDROCHLORIDE      | 1 (1%)            | 1 (<1%)                     | 2 (1%)                             |
| TERAZOSIN                    | 2 (3%)            | 1 (<1%)                     | 1 (<1%)                            |
| VERAPAMIL                    | 0                 | 4 (3%)                      | 0                                  |
| DOXAZOSIN MESILATE           | 2 (3%)            | 0                           | 1 (<1%)                            |
| LOSARTAN POTASSIUM           | 1 (1%)            | 0                           | 2 (1%)                             |

Note: A medication may be included in more than one ATC Level category and appear more than once.  
Note: The following ingredient terms, which do not have associated ATC Level 1 terms, were also used during Post-Treatment with the following frequencies: Bovine Prostate: SAL 50mcg-1 subject, <1%, Capsicum Annum: SAL 50mcg-1 subject, <1%, Dextroamphetamine Saccharate: Placebo-1 subject, 1%, Lactoperoxidase: Placebo-1 subject, 1%, and Zinc Arginate: SAL 50mcg-1 subject, <1%.  
dln73797: /arenv/arprod/ccil18781\_gr33343/asq112989/final/drivers/cm\_t006\_noncopdpst.sas 24AUG2010 16:04

154

CONFIDENTIAL

ASQ112989

Protocol: ASQ112989  
 Population: Modified Intent-to-treat

Page 6 of 22

Table 1.25  
 Summary of Non-COPD Medications Taken Post-Treatment

| ATC Level 1<br>Ingredient | Placebo<br>(N=75) | SAL 50mcg<br>BID<br>(N=151) | FSC<br>250/50mcg<br>BID<br>(N=139) |
|---------------------------|-------------------|-----------------------------|------------------------------------|
| NIFEDIPINE                | 0                 | 1 (<1%)                     | 2 (1%)                             |
| TORASEMIDE                | 0                 | 2 (1%)                      | 1 (<1%)                            |
| BENAZEPRIL HYDROCHLORIDE  | 0                 | 1 (<1%)                     | 1 (<1%)                            |
| CLONIDINE HYDROCHLORIDE   | 0                 | 1 (<1%)                     | 1 (<1%)                            |
| HYDRALAZINE               | 0                 | 1 (<1%)                     | 1 (<1%)                            |
| LIDOCAINE                 | 0                 | 2 (1%)                      | 0                                  |
| METOLAZONE                | 0                 | 2 (1%)                      | 0                                  |
| MONASCUS PURPUREUS        | 1 (1%)            | 0                           | 1 (<1%)                            |
| NADOLOL                   | 1 (1%)            | 0                           | 1 (<1%)                            |
| PENTOXIFYLLINE            | 2 (3%)            | 0                           | 0                                  |
| PRAVASTATIN SODIUM        | 0                 | 2 (1%)                      | 0                                  |
| QUINAPRIL                 | 1 (1%)            | 0                           | 1 (<1%)                            |
| TADALAFIL                 | 1 (1%)            | 0                           | 1 (<1%)                            |
| TERAZOSIN HYDROCHLORIDE   | 1 (1%)            | 0                           | 1 (<1%)                            |
| ALDACTONE (NOS)           | 0                 | 1 (<1%)                     | 0                                  |
| AMIODARONE                | 0                 | 1 (<1%)                     | 0                                  |
| BISOPROLOL FUMARATE       | 0                 | 0                           | 1 (<1%)                            |
| BUMETANIDE                | 1 (1%)            | 0                           | 0                                  |
| DOFETILIDE                | 0                 | 0                           | 1 (<1%)                            |
| DOXAZOSIN                 | 1 (1%)            | 0                           | 0                                  |
| DRONEDARONE               | 0                 | 1 (<1%)                     | 0                                  |
| ENALAPRIL MALEATE         | 1 (1%)            | 0                           | 0                                  |
| FELODIPINE                | 0                 | 0                           | 1 (<1%)                            |
| FLUVASTATIN SODIUM        | 0                 | 1 (<1%)                     | 0                                  |
| HEPARIN SODIUM            | 0                 | 0                           | 1 (<1%)                            |
| HYDRALAZINE HYDROCHLORIDE | 0                 | 0                           | 1 (<1%)                            |

Note: A medication may be included in more than one ATC Level category and appear more than once.  
 Note: The following ingredient terms, which do not have associated ATC Level 1 terms, were also used during Post-Treatment with the following frequencies: Bovine Prostate: SAL 50mcg-1 subject, <1%, Capsicum Annum: SAL 50mcg-1 subject, <1%, Dextroamphetamine Saccharate: Placebo-1 subject, 1%, Lactoperoxidase: Placebo-1 subject, 1%, and Zinc Arginate: SAL 50mcg-1 subject, <1%.  
 dln73797: /arenv/arprod/ccil18781\_gr33343/asq112989/final/drivers/cm\_t006\_noncopdpst.sas 24AUG2010 16:04

155

CONFIDENTIAL

ASQ112989

Protocol: ASQ112989  
Population: Modified Intent-to-treat

Page 7 of 22

Table 1.25  
Summary of Non-COPD Medications Taken Post-Treatment

| ATC Level 1<br>Ingredient          | Placebo<br>(N=75) | SAL 50mcg<br>BID<br>(N=151) | FSC<br>250/50mcg<br>BID<br>(N=139) |
|------------------------------------|-------------------|-----------------------------|------------------------------------|
| HYDROCORTISONE                     | 0                 | 1 (<1%)                     | 0                                  |
| INDAPAMIDE                         | 0                 | 0                           | 1 (<1%)                            |
| ISOSORBIDE                         | 1 (1%)            | 0                           | 0                                  |
| MOEXIPRIL HYDROCHLORIDE            | 0                 | 0                           | 1 (<1%)                            |
| NEBIVOLOL                          | 0                 | 1 (<1%)                     | 0                                  |
| PETROSELINUM CRISPUM               | 0                 | 1 (<1%)                     | 0                                  |
| PHENYLEPHRINE HYDROCHLORIDE        | 1 (1%)            | 0                           | 0                                  |
| PHYTOSTEROL (NOS)                  | 1 (1%)            | 0                           | 0                                  |
| PROCAINE HYDROCHLORIDE             | 0                 | 1 (<1%)                     | 0                                  |
| QUINAPRIL HYDROCHLORIDE            | 1 (1%)            | 0                           | 0                                  |
| ROSUVASTATIN                       | 1 (1%)            | 0                           | 0                                  |
| SILODOSIN                          | 1 (1%)            | 0                           | 0                                  |
| SPIRONOLACTONE                     | 1 (1%)            | 0                           | 0                                  |
| TELMISARTAN                        | 0                 | 0                           | 1 (<1%)                            |
| TIMOLOL                            | 0                 | 1 (<1%)                     | 0                                  |
| TIMOLOL MALEATE                    | 1 (1%)            | 0                           | 0                                  |
| TRANDOLAPRIL                       | 0                 | 1 (<1%)                     | 0                                  |
| ALIMENTARY TRACT AND<br>METABOLISM |                   |                             |                                    |
| Any medication                     | 41 (55%)          | 89 (59%)                    | 93 (67%)                           |
| ACETYLSALICYLIC ACID               | 20 (27%)          | 44 (29%)                    | 48 (35%)                           |
| VITAMINS NOS                       | 11 (15%)          | 17 (11%)                    | 22 (16%)                           |
| OMEPRAZOLE                         | 5 (7%)            | 19 (13%)                    | 16 (12%)                           |
| CALCIUM                            | 5 (7%)            | 8 (5%)                      | 13 (9%)                            |
| METFORMIN                          | 0                 | 6 (4%)                      | 10 (7%)                            |

Note: A medication may be included in more than one ATC Level category and appear more than once.  
Note: The following ingredient terms, which do not have associated ATC Level 1 terms, were also used during Post-Treatment with the following frequencies: Bovine Prostate: SAL 50mcg-1 subject, <1%, Capsicum Annum: SAL 50mcg-1 subject, <1%, Dextroamphetamine Saccharate: Placebo-1 subject, 1%, Lactoperoxidase: Placebo-1 subject, 1%, and Zinc Arginate: SAL 50mcg-1 subject, <1%.  
dln73797: /arenv/arprod/ccil18781\_gr33343/asq112989/final/drivers/cm\_t006\_noncopdpst.sas 24AUG2010 16:04



Protocol: ASQ112989  
 Population: Modified Intent-to-treat

Page 8 of 22

Table 1.25  
 Summary of Non-COPD Medications Taken Post-Treatment

| ATC Level 1<br>Ingredient | Placebo<br>(N=75) | SAL 50mcg<br>BID<br>(N=151) | FSC<br>250/50mcg<br>BID<br>(N=139) |
|---------------------------|-------------------|-----------------------------|------------------------------------|
| ASCORBIC ACID             | 3 (4%)            | 9 (6%)                      | 2 (1%)                             |
| POTASSIUM CHLORIDE        | 3 (4%)            | 5 (3%)                      | 5 (4%)                             |
| ESOMEPRAZOLE MAGNESIUM    | 1 (1%)            | 5 (3%)                      | 6 (4%)                             |
| PANTOPRAZOLE              | 1 (1%)            | 3 (2%)                      | 8 (6%)                             |
| VITAMIN D NOS             | 3 (4%)            | 5 (3%)                      | 4 (3%)                             |
| ERGOCALCIFEROL            | 2 (3%)            | 4 (3%)                      | 5 (4%)                             |
| METFORMIN HYDROCHLORIDE   | 2 (3%)            | 2 (1%)                      | 7 (5%)                             |
| MINERALS NOS              | 4 (5%)            | 3 (2%)                      | 4 (3%)                             |
| RANITIDINE                | 3 (4%)            | 5 (3%)                      | 1 (<1%)                            |
| FAMOTIDINE                | 2 (3%)            | 1 (<1%)                     | 5 (4%)                             |
| GLIPIZIDE                 | 1 (1%)            | 4 (3%)                      | 3 (2%)                             |
| RANITIDINE HYDROCHLORIDE  | 2 (3%)            | 4 (3%)                      | 2 (1%)                             |
| TOCOPHEROL                | 2 (3%)            | 4 (3%)                      | 2 (1%)                             |
| CALCIUM CARBONATE         | 2 (3%)            | 1 (<1%)                     | 3 (2%)                             |
| LANSOPRAZOLE              | 0                 | 3 (2%)                      | 3 (2%)                             |
| GLIBENCLAMIDE             | 1 (1%)            | 3 (2%)                      | 1 (<1%)                            |
| POTASSIUM NOS             | 0                 | 3 (2%)                      | 2 (1%)                             |
| GLIMEPIRIDE               | 0                 | 1 (<1%)                     | 3 (2%)                             |
| INSULIN ASPART            | 1 (1%)            | 1 (<1%)                     | 1 (<1%)                            |
| INSULIN GLARGINE          | 0                 | 1 (<1%)                     | 2 (1%)                             |
| LOPERAMIDE HYDROCHLORIDE  | 1 (1%)            | 0                           | 2 (1%)                             |
| PLANTAGO OVATA            | 0                 | 1 (<1%)                     | 2 (1%)                             |
| PYRIDOXINE HYDROCHLORIDE  | 0                 | 2 (1%)                      | 1 (<1%)                            |
| SITAGLIPTIN               | 0                 | 1 (<1%)                     | 2 (1%)                             |
| THIAMINE HYDROCHLORIDE    | 1 (1%)            | 1 (<1%)                     | 1 (<1%)                            |
| ZINC                      | 1 (1%)            | 1 (<1%)                     | 1 (<1%)                            |

Note: A medication may be included in more than one ATC Level category and appear more than once.  
 Note: The following ingredient terms, which do not have associated ATC Level 1 terms, were also used during Post-Treatment with the following frequencies: Bovine Prostate: SAL 50mcg-1 subject, <1%, Capsicum Annuum: SAL 50mcg-1 subject, <1%, Dextroamphetamine Saccharate: Placebo-1 subject, 1%, Lactoperoxidase: Placebo-1 subject, 1%, and Zinc Arginate: SAL 50mcg-1 subject, <1%.  
 dln73797: /arenv/arprod/ccil18781\_gr33343/asq112989/final/drivers/cm\_t006\_noncopdpst.sas 24AUG2010 16:04

157

CONFIDENTIAL

ASQ112989

Protocol: ASQ112989  
Population: Modified Intent-to-treat

Page 9 of 22

Table 1.25  
Summary of Non-COPD Medications Taken Post-Treatment

| ATC Level 1<br>Ingredient            | Placebo<br>(N=75) | SAL 50mcg<br>BID<br>(N=151) | FSC<br>250/50mcg<br>BID<br>(N=139) |
|--------------------------------------|-------------------|-----------------------------|------------------------------------|
| BETACAROTENE                         | 0                 | 2 (1%)                      | 0                                  |
| CALCIUM CITRATE                      | 1 (1%)            | 0                           | 1 (<1%)                            |
| CINNAMOMUM VERUM                     | 0                 | 0                           | 2 (1%)                             |
| CLOTRIMAZOLE                         | 0                 | 0                           | 2 (1%)                             |
| COLECALCIFEROL                       | 0                 | 0                           | 2 (1%)                             |
| COPPER                               | 0                 | 2 (1%)                      | 0                                  |
| DEXLANSOPRAZOLE                      | 0                 | 1 (<1%)                     | 1 (<1%)                            |
| HYOSCYAMINE SULFATE                  | 1 (1%)            | 1 (<1%)                     | 0                                  |
| INSULIN DETEMIR                      | 2 (3%)            | 0                           | 0                                  |
| INSULIN HUMAN INJECTION,<br>ISOPHANE | 1 (1%)            | 0                           | 1 (<1%)                            |
| LACTOBACILLUS ACIDOPHILUS            | 1 (1%)            | 1 (<1%)                     | 0                                  |
| MAGNESIUM OXIDE                      | 0                 | 2 (1%)                      | 0                                  |
| METRONIDAZOLE                        | 1 (1%)            | 1 (<1%)                     | 0                                  |
| PIOGLITAZONE HYDROCHLORIDE           | 1 (1%)            | 0                           | 1 (<1%)                            |
| PREDNISONE                           | 0                 | 0                           | 2 (1%)                             |
| RABEPRAZOLE SODIUM                   | 0                 | 1 (<1%)                     | 1 (<1%)                            |
| RIBOFLAVIN                           | 0                 | 2 (1%)                      | 0                                  |
| SELENIUM                             | 0                 | 1 (<1%)                     | 1 (<1%)                            |
| SENNA                                | 0                 | 0                           | 2 (1%)                             |
| TETRACYCLINE                         | 1 (1%)            | 0                           | 1 (<1%)                            |
| VITAMIN B SUBSTANCES NOS             | 0                 | 1 (<1%)                     | 1 (<1%)                            |
| ATROPINE SULFATE                     | 0                 | 1 (<1%)                     | 0                                  |
| BIOTIN                               | 0                 | 0                           | 1 (<1%)                            |
| CHOLINE BITARTRATE                   | 0                 | 0                           | 1 (<1%)                            |
| CITRIC ACID                          | 0                 | 0                           | 1 (<1%)                            |

Note: A medication may be included in more than one ATC Level category and appear more than once.

Note: The following ingredient terms, which do not have associated ATC Level 1 terms, were also used during Post-Treatment with the following frequencies: Bovine Prostate: SAL 50mcg-1 subject, <1%, Capsicum Annum: SAL 50mcg-1 subject, <1%, Dextroamphetamine Saccharate: Placebo-1 subject, 1%, Lactoperoxidase: Placebo-1 subject, 1%, and Zinc Arginate: SAL 50mcg-1 subject, <1%.

dln73797: /arenv/arprod/ccil8781\_gr33343/asq112989/final/drivers/cm\_t006\_noncopdpst.sas 24AUG2010 16:04

158

CONFIDENTIAL

ASQ112989

Protocol: ASQ112989  
 Population: Modified Intent-to-treat

Page 10 of 22

Table 1.25  
 Summary of Non-COPD Medications Taken Post-Treatment

| ATC Level 1<br>Ingredient             | Placebo<br>(N=75) | SAL 50mcg<br>BID<br>(N=151) | FSC<br>250/50mcg<br>BID<br>(N=139) |
|---------------------------------------|-------------------|-----------------------------|------------------------------------|
| DEXAMFETAMINE SULFATE                 | 1 (1%)            | 0                           | 0                                  |
| DICYCLOVERINE HYDROCHLORIDE           | 0                 | 0                           | 1 (<1%)                            |
| DIHYDROXYALUMINUM SODIUM<br>CARBONATE | 0                 | 1 (<1%)                     | 0                                  |
| DOCUSATE                              | 0                 | 0                           | 1 (<1%)                            |
| DOCUSATE SODIUM                       | 1 (1%)            | 0                           | 0                                  |
| DULCOLAX (NOS)                        | 1 (1%)            | 0                           | 0                                  |
| ESOMEPRAZOLE                          | 1 (1%)            | 0                           | 0                                  |
| HYDROCORTISONE                        | 0                 | 1 (<1%)                     | 0                                  |
| HYDROCORTISONE VALERATE               | 0                 | 1 (<1%)                     | 0                                  |
| HYOSCINE HYDROBROMIDE                 | 0                 | 1 (<1%)                     | 0                                  |
| INSULIN HUMAN                         | 1 (1%)            | 0                           | 0                                  |
| INSULIN LISPRO                        | 0                 | 1 (<1%)                     | 0                                  |
| ISOPHANE INSULIN                      | 0                 | 0                           | 1 (<1%)                            |
| MAGNESIUM                             | 0                 | 0                           | 1 (<1%)                            |
| MAGNESIUM GLUCONATE                   | 0                 | 0                           | 1 (<1%)                            |
| MECLOZINE                             | 0                 | 1 (<1%)                     | 0                                  |
| METOCLOPRAMIDE HYDROCHLORIDE          | 1 (1%)            | 0                           | 0                                  |
| PANTOTHENIC ACID                      | 0                 | 1 (<1%)                     | 0                                  |
| POTASSIUM GLUCONATE                   | 0                 | 1 (<1%)                     | 0                                  |
| PROCHLORPERAZINE                      | 0                 | 0                           | 1 (<1%)                            |
| PROMETHAZINE                          | 1 (1%)            | 0                           | 0                                  |
| PYRIDOXINE                            | 0                 | 1 (<1%)                     | 0                                  |
| REPAGLINIDE                           | 0                 | 0                           | 1 (<1%)                            |
| RETINOL                               | 0                 | 1 (<1%)                     | 0                                  |
| ROSIGLITAZONE                         | 0                 | 0                           | 1 (<1%)                            |

Note: A medication may be included in more than one ATC Level category and appear more than once.  
 Note: The following ingredient terms, which do not have associated ATC Level 1 terms, were also used during Post-Treatment with the following frequencies: Bovine Prostate: SAL 50mcg-1 subject, <1%, Capsicum Annum: SAL 50mcg-1 subject, <1%, Dextroamphetamine Saccharate: Placebo-1 subject, 1%, Lactoperoxidase: Placebo-1 subject, 1%, and Zinc Arginate: SAL 50mcg-1 subject, <1%.  
 dln73797: /arenv/arprod/ccil8781\_gr33343/asq112989/final/drivers/cm\_t006\_noncopdpst.sas 24AUG2010 16:04

159

CONFIDENTIAL

ASQ112989

Protocol: ASQ112989

Page 11 of 22

Population: Modified Intent-to-treat

Table 1.25  
Summary of Non-COPD Medications Taken Post-Treatment

| ATC Level 1<br>Ingredient      | Placebo<br>(N=75) | SAL 50mcg<br>BID<br>(N=151) | FSC<br>250/50mcg<br>BID<br>(N=139) |
|--------------------------------|-------------------|-----------------------------|------------------------------------|
| SILYBUM MARIANUM               | 0                 | 0                           | 1 (<1%)                            |
| SODIUM BICARBONATE             | 0                 | 0                           | 1 (<1%)                            |
| SODIUM CHLORIDE                | 1 (1%)            | 0                           | 0                                  |
| SUCRALFATE                     | 0                 | 0                           | 1 (<1%)                            |
| VITAMIN B NOS                  | 0                 | 1 (<1%)                     | 0                                  |
| ZEA MAYS                       | 0                 | 1 (<1%)                     | 0                                  |
| <b>MUSCULO-SKELETAL SYSTEM</b> |                   |                             |                                    |
| Any medication                 | 47 (63%)          | 70 (46%)                    | 74 (53%)                           |
| ACETYLSALICYLIC ACID           | 20 (27%)          | 44 (29%)                    | 48 (35%)                           |
| IBUPROFEN                      | 9 (12%)           | 20 (13%)                    | 12 (9%)                            |
| NAPROXEN SODIUM                | 7 (9%)            | 4 (3%)                      | 6 (4%)                             |
| NAPROXEN                       | 3 (4%)            | 4 (3%)                      | 5 (4%)                             |
| ALENDRONATE SODIUM             | 4 (5%)            | 4 (3%)                      | 3 (2%)                             |
| MELOXICAM                      | 5 (7%)            | 0                           | 3 (2%)                             |
| CHONDROITIN                    | 1 (1%)            | 2 (1%)                      | 2 (1%)                             |
| ALLOPURINOL                    | 0                 | 3 (2%)                      | 1 (<1%)                            |
| CELECOXIB                      | 1 (1%)            | 1 (<1%)                     | 2 (1%)                             |
| CYCLOBENZAPRINE                | 1 (1%)            | 0                           | 3 (2%)                             |
| HYDROCHLORIDE                  |                   |                             |                                    |
| GLUCOSAMINE                    | 1 (1%)            | 2 (1%)                      | 1 (<1%)                            |
| CARISOPRODOL                   | 1 (1%)            | 1 (<1%)                     | 1 (<1%)                            |
| COLCHICINE                     | 1 (1%)            | 1 (<1%)                     | 1 (<1%)                            |
| DIMETHYL SULFONE               | 0                 | 2 (1%)                      | 1 (<1%)                            |
| RISEDRONATE SODIUM             | 0                 | 0                           | 3 (2%)                             |
| ALENDRONIC ACID                | 1 (1%)            | 0                           | 1 (<1%)                            |

Note: A medication may be included in more than one ATC Level category and appear more than once.

Note: The following ingredient terms, which do not have associated ATC Level 1 terms, were also used during Post-Treatment with the following frequencies: Bovine Prostate: SAL 50mcg-1 subject, <1%, Capsicum Annum: SAL 50mcg-1 subject, <1%, Dextroamphetamine Saccharate: Placebo-1 subject, 1%, Lactoperoxidase: Placebo-1 subject, 1%, and Zinc Arginate: SAL 50mcg-1 subject, <1%.

dln73797: /arenv/arprod/ccil18781\_gr33343/asq112989/final/drivers/cm\_t006\_noncopdpst.sas 24AUG2010 16:04

160

CONFIDENTIAL

ASQ112989

Protocol: ASQ112989  
 Population: Modified Intent-to-treat

Page 12 of 22

Table 1.25  
 Summary of Non-COPD Medications Taken Post-Treatment

| ATC Level 1<br>Ingredient      | Placebo<br>(N=75) | SAL 50mcg<br>BID<br>(N=151) | FSC<br>250/50mcg<br>BID<br>(N=139) |
|--------------------------------|-------------------|-----------------------------|------------------------------------|
| CAPSAICIN                      | 0                 | 0                           | 2 (1%)                             |
| CYCLOBENZAPRINE                | 0                 | 1 (<1%)                     | 1 (<1%)                            |
| DICLOFENAC                     | 1 (1%)            | 1 (<1%)                     | 0                                  |
| GLUCOSAMINE SULFATE            | 0                 | 1 (<1%)                     | 1 (<1%)                            |
| KETOROLAC TROMETAMOL           | 1 (1%)            | 0                           | 1 (<1%)                            |
| NABUMETONE                     | 0                 | 1 (<1%)                     | 1 (<1%)                            |
| SODIUM IBANDRONATE             | 0                 | 1 (<1%)                     | 1 (<1%)                            |
| BACLOFEN                       | 0                 | 0                           | 1 (<1%)                            |
| DICLOFENAC SODIUM              | 0                 | 1 (<1%)                     | 0                                  |
| ETODOLAC                       | 0                 | 1 (<1%)                     | 0                                  |
| FEBUXOSTAT                     | 0                 | 0                           | 1 (<1%)                            |
| GLUCOSAMINE HYDROCHLORIDE      | 0                 | 1 (<1%)                     | 0                                  |
| HYALURONIC ACID                | 1 (1%)            | 0                           | 0                                  |
| METAXALONE                     | 1 (1%)            | 0                           | 0                                  |
| PIROXICAM                      | 0                 | 1 (<1%)                     | 0                                  |
| TIZANIDINE HYDROCHLORIDE       | 0                 | 0                           | 1 (<1%)                            |
| ZOLEDRONIC ACID                | 0                 | 0                           | 1 (<1%)                            |
| BLOOD AND BLOOD FORMING ORGANS |                   |                             |                                    |
| Any medication                 | 26 (35%)          | 59 (39%)                    | 60 (43%)                           |
| ACETYLSALICYLIC ACID           | 20 (27%)          | 44 (29%)                    | 48 (35%)                           |
| CLOPIDOGREL BISULFATE          | 3 (4%)            | 9 (6%)                      | 7 (5%)                             |
| CYANOCOBALAMIN                 | 3 (4%)            | 8 (5%)                      | 4 (3%)                             |
| POTASSIUM CHLORIDE             | 3 (4%)            | 5 (3%)                      | 5 (4%)                             |
| FERROUS SULPHATE               | 1 (1%)            | 0                           | 5 (4%)                             |
| FOLIC ACID                     | 1 (1%)            | 3 (2%)                      | 2 (1%)                             |

Note: A medication may be included in more than one ATC Level category and appear more than once.  
 Note: The following ingredient terms, which do not have associated ATC Level 1 terms, were also used during Post-Treatment with the following frequencies: Bovine Prostate: SAL 50mcg-1 subject, <1%, Capsicum Annuum: SAL 50mcg-1 subject, <1%, Dextroamphetamine Saccharate: Placebo-1 subject, 1%, Lactoperoxidase: Placebo-1 subject, 1%, and Zinc Arginate: SAL 50mcg-1 subject, <1%.  
 dln73797: /arenv/arprod/ccil18781\_gr33343/asq112989/final/drivers/cm\_t006\_noncopdpst.sas 24AUG2010 16:04

161

CONFIDENTIAL

ASQ112989

Protocol: ASQ112989  
Population: Modified Intent-to-treat

Page 13 of 22

Table 1.25  
Summary of Non-COPD Medications Taken Post-Treatment

| ATC Level 1<br>Ingredient                 | Placebo<br>(N=75) | SAL 50mcg<br>BID<br>(N=151) | FSC<br>250/50mcg<br>BID<br>(N=139) |
|-------------------------------------------|-------------------|-----------------------------|------------------------------------|
| POTASSIUM NOS                             | 0                 | 3 (2%)                      | 2 (1%)                             |
| WARFARIN SODIUM                           | 0                 | 2 (1%)                      | 2 (1%)                             |
| DIPYRIDAMOLE                              | 2 (3%)            | 1 (<1%)                     | 0                                  |
| WARFARIN                                  | 0                 | 2 (1%)                      | 1 (<1%)                            |
| CILOSTAZOL                                | 0                 | 0                           | 1 (<1%)                            |
| FERROUS GLUCONATE                         | 0                 | 0                           | 1 (<1%)                            |
| GLUCOSE OXIDASE                           | 1 (1%)            | 0                           | 0                                  |
| HEPARIN SODIUM                            | 0                 | 0                           | 1 (<1%)                            |
| IRON                                      | 0                 | 1 (<1%)                     | 0                                  |
| SODIUM BICARBONATE                        | 0                 | 0                           | 1 (<1%)                            |
| SODIUM CHLORIDE                           | 1 (1%)            | 0                           | 0                                  |
| GENITO URINARY SYSTEM AND SEX<br>HORMONES |                   |                             |                                    |
| Any medication                            | 24 (32%)          | 37 (25%)                    | 38 (27%)                           |
| IBUPROFEN                                 | 9 (12%)           | 20 (13%)                    | 12 (9%)                            |
| NAPROXEN SODIUM                           | 7 (9%)            | 4 (3%)                      | 6 (4%)                             |
| NAPROXEN                                  | 3 (4%)            | 4 (3%)                      | 5 (4%)                             |
| TAMSULOSIN HYDROCHLORIDE                  | 1 (1%)            | 1 (<1%)                     | 3 (2%)                             |
| ESTRADIOL                                 | 1 (1%)            | 2 (1%)                      | 1 (<1%)                            |
| TERAZOSIN                                 | 2 (3%)            | 1 (<1%)                     | 1 (<1%)                            |
| DIMETHYL SULFONE                          | 0                 | 2 (1%)                      | 1 (<1%)                            |
| DOXAZOSIN MESILATE                        | 2 (3%)            | 0                           | 1 (<1%)                            |
| DUTASTERIDE                               | 0                 | 1 (<1%)                     | 2 (1%)                             |
| FINASTERIDE                               | 2 (3%)            | 1 (<1%)                     | 0                                  |
| SERENOA REPENS                            | 0                 | 1 (<1%)                     | 2 (1%)                             |

Note: A medication may be included in more than one ATC Level category and appear more than once.

Note: The following ingredient terms, which do not have associated ATC Level 1 terms, were also used during Post-Treatment with the following frequencies: Bovine Prostate: SAL 50mcg-1 subject, <1%, Capsicum Annum: SAL 50mcg-1 subject, <1%, Dextroamphetamine Saccharate: Placebo-1 subject, 1%, Lactoperoxidase: Placebo-1 subject, 1%, and Zinc Arginate: SAL 50mcg-1 subject, <1%.

dln73797: /arenv/arprod/ccil8781\_gr33343/asq112989/final/drivers/cm\_t006\_noncopdpst.sas 24AUG2010 16:04

162

CONFIDENTIAL

ASQ112989

Protocol: ASQ112989  
 Population: Modified Intent-to-treat

Page 14 of 22

Table 1.25  
 Summary of Non-COPD Medications Taken Post-Treatment

| ATC Level 1<br>Ingredient  | Placebo<br>(N=75) | SAL 50mcg<br>BID<br>(N=151) | FSC<br>250/50mcg<br>BID<br>(N=139) |
|----------------------------|-------------------|-----------------------------|------------------------------------|
| TOLTERODINE TARTRATE       | 0                 | 2 (1%)                      | 1 (<1%)                            |
| ALFUZOSIN HYDROCHLORIDE    | 0                 | 1 (<1%)                     | 1 (<1%)                            |
| CLOTRIMAZOLE               | 0                 | 0                           | 2 (1%)                             |
| COPPER                     | 0                 | 2 (1%)                      | 0                                  |
| ESTROGENS CONJUGATED       | 0                 | 0                           | 2 (1%)                             |
| METRONIDAZOLE              | 1 (1%)            | 1 (<1%)                     | 0                                  |
| OXYBUTYNYN HYDROCHLORIDE   | 0                 | 0                           | 2 (1%)                             |
| SILDENAFIL CITRATE         | 0                 | 2 (1%)                      | 0                                  |
| TADALAFIL                  | 1 (1%)            | 0                           | 1 (<1%)                            |
| TERAZOSIN HYDROCHLORIDE    | 1 (1%)            | 0                           | 1 (<1%)                            |
| CLINDAMYCIN                | 0                 | 1 (<1%)                     | 0                                  |
| DOXAZOSIN                  | 1 (1%)            | 0                           | 0                                  |
| KETOCONAZOLE               | 0                 | 0                           | 1 (<1%)                            |
| METHYLTHIONINIUM CHLORIDE  | 1 (1%)            | 0                           | 0                                  |
| NORETHISTERONE ACETATE     | 0                 | 0                           | 1 (<1%)                            |
| PHENYL SALICYLATE          | 1 (1%)            | 0                           | 0                                  |
| RALOXIFENE HYDROCHLORIDE   | 1 (1%)            | 0                           | 0                                  |
| SILODOSIN                  | 1 (1%)            | 0                           | 0                                  |
| SODIUM PHOSPHATE MONOBASIC | 1 (1%)            | 0                           | 0                                  |
| SOLIFENACIN SUCCINATE      | 0                 | 1 (<1%)                     | 0                                  |
| TAMSULOSIN                 | 1 (1%)            | 0                           | 0                                  |
| VARDENAFIL                 | 0                 | 0                           | 1 (<1%)                            |
| RESPIRATORY SYSTEM         |                   |                             |                                    |
| Any medication             | 11 (15%)          | 40 (26%)                    | 26 (19%)                           |
| HYDROCODONE BITARTRATE     | 3 (4%)            | 16 (11%)                    | 10 (7%)                            |

Note: A medication may be included in more than one ATC Level category and appear more than once.  
 Note: The following ingredient terms, which do not have associated ATC Level 1 terms, were also used during Post-Treatment with the following frequencies: Bovine Prostate: SAL 50mcg-1 subject, <1%, Capsicum Annum: SAL 50mcg-1 subject, <1%, Dextroamphetamine Saccharate: Placebo-1 subject, 1%, Lactoperoxidase: Placebo-1 subject, 1%, and Zinc Arginate: SAL 50mcg-1 subject, <1%.  
 dln73797: /arenv/arprod/ccil8781\_gr33343/asq112989/final/drivers/cm\_t006\_noncopdpst.sas 24AUG2010 16:04

163

CONFIDENTIAL

ASQ112989

Protocol: ASQ112989  
Population: Modified Intent-to-treat

Page 15 of 22

Table 1.25  
Summary of Non-COPD Medications Taken Post-Treatment

| ATC Level 1<br>Ingredient        | Placebo<br>(N=75) | SAL 50mcg<br>BID<br>(N=151) | FSC<br>250/50mcg<br>BID<br>(N=139) |
|----------------------------------|-------------------|-----------------------------|------------------------------------|
| HYDROCODONE                      | 1 (1%)            | 6 (4%)                      | 3 (2%)                             |
| BENADRYL (NOS)                   | 0                 | 1 (<1%)                     | 3 (2%)                             |
| CETIRIZINE HYDROCHLORIDE         | 1 (1%)            | 1 (<1%)                     | 1 (<1%)                            |
| DIPHENHYDRAMINE                  | 1 (1%)            | 0                           | 2 (1%)                             |
| DIPHENHYDRAMINE<br>HYDROCHLORIDE | 0                 | 3 (2%)                      | 0                                  |
| LORATADINE                       | 1 (1%)            | 1 (<1%)                     | 1 (<1%)                            |
| CETIRIZINE                       | 0                 | 1 (<1%)                     | 1 (<1%)                            |
| CHLORPHENAMINE MALEATE           | 0                 | 1 (<1%)                     | 1 (<1%)                            |
| FEXOFENADINE                     | 1 (1%)            | 0                           | 1 (<1%)                            |
| FEXOFENADINE HYDROCHLORIDE       | 0                 | 2 (1%)                      | 0                                  |
| FLUTICASONE PROPIONATE           | 0                 | 1 (<1%)                     | 1 (<1%)                            |
| GUAIFENESIN                      | 1 (1%)            | 1 (<1%)                     | 0                                  |
| LIDOCAINE                        | 0                 | 2 (1%)                      | 0                                  |
| SUDAFED (NOS)                    | 0                 | 1 (<1%)                     | 1 (<1%)                            |
| ACETYLCYSTEINE                   | 0                 | 1 (<1%)                     | 0                                  |
| ATROPINE SULFATE                 | 0                 | 1 (<1%)                     | 0                                  |
| CHLORPHENAMINE                   | 0                 | 0                           | 1 (<1%)                            |
| CICLESONIDE                      | 0                 | 0                           | 1 (<1%)                            |
| COCAINE                          | 0                 | 0                           | 1 (<1%)                            |
| CODEINE                          | 0                 | 0                           | 1 (<1%)                            |
| DEXTROMETHORPHAN<br>HYDROBROMIDE | 0                 | 0                           | 1 (<1%)                            |
| DIPHENHYDRAMINE CITRATE          | 0                 | 1 (<1%)                     | 0                                  |
| DOXYLAMINE SUCCINATE             | 0                 | 0                           | 1 (<1%)                            |
| LEVOCETIRIZINE HYDROCHLORIDE     | 0                 | 1 (<1%)                     | 0                                  |

Note: A medication may be included in more than one ATC Level category and appear more than once.  
Note: The following ingredient terms, which do not have associated ATC Level 1 terms, were also used during Post-Treatment with the following frequencies: Bovine Prostate: SAL 50mcg-1 subject, <1%, Capsicum Annum: SAL 50mcg-1 subject, <1%, Dextroamphetamine Saccharate: Placebo-1 subject, 1%, Lactoperoxidase: Placebo-1 subject, 1%, and Zinc Arginate: SAL 50mcg-1 subject, <1%.  
dln73797: /arenv/arprod/ccil18781\_gr33343/asq112989/final/drivers/cm\_t006\_noncopdpst.sas 24AUG2010 16:04

164

CONFIDENTIAL

ASQ112989



Protocol: ASQ112989  
 Population: Modified Intent-to-treat

Page 16 of 22

Table 1.25  
 Summary of Non-COPD Medications Taken Post-Treatment

| ATC Level 1<br>Ingredient         | Placebo<br>(N=75) | SAL 50mcg<br>BID<br>(N=151) | FSC<br>250/50mcg<br>BID<br>(N=139) |
|-----------------------------------|-------------------|-----------------------------|------------------------------------|
| MECLOZINE                         | 0                 | 1 (<1%)                     | 0                                  |
| MONTELUKAST SODIUM                | 0                 | 1 (<1%)                     | 0                                  |
| OXYGEN                            | 0                 | 0                           | 1 (<1%)                            |
| OXYMETAZOLINE HYDROCHLORIDE       | 0                 | 1 (<1%)                     | 0                                  |
| PHENYLEPHRINE HYDROCHLORIDE       | 1 (1%)            | 0                           | 0                                  |
| PHENYLPROPANOLAMINE<br>BITARTRATE | 0                 | 0                           | 1 (<1%)                            |
| PROMETHAZINE                      | 1 (1%)            | 0                           | 0                                  |
| PSEUDOEPHEDRINE                   | 0                 | 0                           | 1 (<1%)                            |
| PSEUDOEPHEDRINE<br>HYDROCHLORIDE  | 0                 | 0                           | 1 (<1%)                            |
| RETINOL                           | 0                 | 1 (<1%)                     | 0                                  |
| SODIUM CHLORIDE                   | 1 (1%)            | 0                           | 0                                  |
| TYLENOL COLD NOS                  | 0                 | 1 (<1%)                     | 0                                  |
| DERMATOLOGICALS                   |                   |                             |                                    |
| Any medication                    | 11 (15%)          | 20 (13%)                    | 16 (12%)                           |
| TOCOPHEROL                        | 2 (3%)            | 4 (3%)                      | 2 (1%)                             |
| GLYCERYL TRINITRATE               | 1 (1%)            | 4 (3%)                      | 1 (<1%)                            |
| BENADRYL (NOS)                    | 0                 | 1 (<1%)                     | 3 (2%)                             |
| DIPHENHYDRAMINE                   | 1 (1%)            | 0                           | 2 (1%)                             |
| DIPHENHYDRAMINE<br>HYDROCHLORIDE  | 0                 | 3 (2%)                      | 0                                  |
| FINASTERIDE                       | 2 (3%)            | 1 (<1%)                     | 0                                  |
| ACYCLOVIR                         | 0                 | 1 (<1%)                     | 1 (<1%)                            |
| BETACAROTENE                      | 0                 | 2 (1%)                      | 0                                  |

Note: A medication may be included in more than one ATC Level category and appear more than once.  
 Note: The following ingredient terms, which do not have associated ATC Level 1 terms, were also used during Post-Treatment with the following frequencies: Bovine Prostate: SAL 50mcg-1 subject, <1%, Capsicum Annuum: SAL 50mcg-1 subject, <1%, Dextroamphetamine Saccharate: Placebo-1 subject, 1%, Lactoperoxidase: Placebo-1 subject, 1%, and Zinc Arginate: SAL 50mcg-1 subject, <1%.  
 dln73797: /arenv/arprod/ccil8781\_gr33343/asq112989/final/drivers/cm\_t006\_noncopdpst.sas 24AUG2010 16:04

165

CONFIDENTIAL

ASQ112989

Protocol: ASQ112989  
Population: Modified Intent-to-treat

Page 17 of 22

Table 1.25  
Summary of Non-COPD Medications Taken Post-Treatment

| ATC Level 1<br>Ingredient | Placebo<br>(N=75) | SAL 50mcg<br>BID<br>(N=151) | FSC<br>250/50mcg<br>BID<br>(N=139) |
|---------------------------|-------------------|-----------------------------|------------------------------------|
| CLOTRIMAZOLE              | 0                 | 0                           | 2 (1%)                             |
| FLUTICASONE PROPIONATE    | 0                 | 1 (<1%)                     | 1 (<1%)                            |
| LIDOCAINE                 | 0                 | 2 (1%)                      | 0                                  |
| METRONIDAZOLE             | 1 (1%)            | 1 (<1%)                     | 0                                  |
| SELENIUM                  | 0                 | 1 (<1%)                     | 1 (<1%)                            |
| TETRACYCLINE              | 1 (1%)            | 0                           | 1 (<1%)                            |
| ZINC OXIDE                | 0                 | 2 (1%)                      | 0                                  |
| AMINOBENZOIC ACID         | 0                 | 0                           | 1 (<1%)                            |
| CLINDAMYCIN               | 0                 | 1 (<1%)                     | 0                                  |
| COCAINE                   | 0                 | 0                           | 1 (<1%)                            |
| DIPHENHYDRAMINE CITRATE   | 0                 | 1 (<1%)                     | 0                                  |
| HYALURONIC ACID           | 1 (1%)            | 0                           | 0                                  |
| HYDROCORTISONE            | 0                 | 1 (<1%)                     | 0                                  |
| HYDROCORTISONE VALERATE   | 0                 | 1 (<1%)                     | 0                                  |
| KETOCONAZOLE              | 0                 | 0                           | 1 (<1%)                            |
| LYSOZYME                  | 1 (1%)            | 0                           | 0                                  |
| PHENYL SALICYLATE         | 1 (1%)            | 0                           | 0                                  |
| PROMETHAZINE              | 1 (1%)            | 0                           | 0                                  |
| RETINOL                   | 0                 | 1 (<1%)                     | 0                                  |
| SENSORY ORGANS            |                   |                             |                                    |
| Any medication            | 8 (11%)           | 17 (11%)                    | 14 (10%)                           |
| CLONIDINE                 | 0                 | 4 (3%)                      | 5 (4%)                             |
| ACYCLOVIR                 | 0                 | 1 (<1%)                     | 1 (<1%)                            |
| CLONIDINE HYDROCHLORIDE   | 0                 | 1 (<1%)                     | 1 (<1%)                            |
| DICLOFENAC                | 1 (1%)            | 1 (<1%)                     | 0                                  |

Note: A medication may be included in more than one ATC Level category and appear more than once.  
Note: The following ingredient terms, which do not have associated ATC Level 1 terms, were also used during Post-Treatment with the following frequencies: Bovine Prostate: SAL 50mcg-1 subject, <1%, Capsicum Annum: SAL 50mcg-1 subject, <1%, Dextroamphetamine Saccharate: Placebo-1 subject, 1%, Lactoperoxidase: Placebo-1 subject, 1%, and Zinc Arginate: SAL 50mcg-1 subject, <1%.  
dln73797: /arenv/arprod/ccil18781\_gr33343/asq112989/final/drivers/cm\_t006\_noncopdpst.sas 24AUG2010 16:04

Protocol: ASQ112989  
 Population: Modified Intent-to-treat

Page 18 of 22

Table 1.25  
 Summary of Non-COPD Medications Taken Post-Treatment

| ATC Level 1<br>Ingredient   | Placebo<br>(N=75) | SAL 50mcg<br>BID<br>(N=151) | FSC<br>250/50mcg<br>BID<br>(N=139) |
|-----------------------------|-------------------|-----------------------------|------------------------------------|
| KETOROLAC TROMETAMOL        | 1 (1%)            | 0                           | 1 (<1%)                            |
| LATANOPROST                 | 1 (1%)            | 1 (<1%)                     | 0                                  |
| LIDOCAINE                   | 0                 | 2 (1%)                      | 0                                  |
| TETRACYCLINE                | 1 (1%)            | 0                           | 1 (<1%)                            |
| ACETYLCYSTEINE              | 0                 | 1 (<1%)                     | 0                                  |
| ATROPINE SULFATE            | 0                 | 1 (<1%)                     | 0                                  |
| BENZYL PENICILLIN           | 0                 | 0                           | 1 (<1%)                            |
| BRIMONIDINE TARTRATE        | 0                 | 1 (<1%)                     | 0                                  |
| COCAINE                     | 0                 | 0                           | 1 (<1%)                            |
| DICLOFENAC SODIUM           | 0                 | 1 (<1%)                     | 0                                  |
| HEPARIN SODIUM              | 0                 | 0                           | 1 (<1%)                            |
| HYALURONIC ACID             | 1 (1%)            | 0                           | 0                                  |
| HYDROCORTISONE              | 0                 | 1 (<1%)                     | 0                                  |
| HYOSCINE HYDROBROMIDE       | 0                 | 1 (<1%)                     | 0                                  |
| INTERFERON BETA             | 0                 | 0                           | 1 (<1%)                            |
| ISOSORBIDE                  | 1 (1%)            | 0                           | 0                                  |
| OPTIVE (NOS)                | 0                 | 0                           | 1 (<1%)                            |
| OXYMETAZOLINE HYDROCHLORIDE | 0                 | 1 (<1%)                     | 0                                  |
| PHENYLEPHRINE HYDROCHLORIDE | 1 (1%)            | 0                           | 0                                  |
| PIROXICAM                   | 0                 | 1 (<1%)                     | 0                                  |
| PROCAINE HYDROCHLORIDE      | 0                 | 1 (<1%)                     | 0                                  |
| RETINOL                     | 0                 | 1 (<1%)                     | 0                                  |
| SODIUM CHLORIDE             | 1 (1%)            | 0                           | 0                                  |
| TIMOLOL                     | 0                 | 1 (<1%)                     | 0                                  |
| TIMOLOL MALEATE             | 1 (1%)            | 0                           | 0                                  |

Note: A medication may be included in more than one ATC Level category and appear more than once.  
 Note: The following ingredient terms, which do not have associated ATC Level 1 terms, were also used during Post-Treatment with the following frequencies: Bovine Prostate: SAL 50mcg-1 subject, <1%, Capsicum Annum: SAL 50mcg-1 subject, <1%, Dextroamphetamine Saccharate: Placebo-1 subject, 1%, Lactoperoxidase: Placebo-1 subject, 1%, and Zinc Arginate: SAL 50mcg-1 subject, <1%.  
 dln73797: /arenv/arprod/ccil8781\_gr33343/asq112989/final/drivers/cm\_t006\_noncopdpst.sas 24AUG2010 16:04

167

CONFIDENTIAL

ASQ112989

Protocol: ASQ112989  
Population: Modified Intent-to-treat

Page 19 of 22

Table 1.25  
Summary of Non-COPD Medications Taken Post-Treatment

| ATC Level 1<br>Ingredient                                             | Placebo<br>(N=75) | SAL 50mcg<br>BID<br>(N=151) | FSC<br>250/50mcg<br>BID<br>(N=139) |
|-----------------------------------------------------------------------|-------------------|-----------------------------|------------------------------------|
| SYSTEMIC HORMONAL<br>PREPARATIONS, EXCL. SEX<br>HORMONES AND INSULINS |                   |                             |                                    |
| Any medication                                                        | 5 (7%)            | 16 (11%)                    | 11 (8%)                            |
| LEVOTHYROXINE SODIUM                                                  | 3 (4%)            | 5 (3%)                      | 5 (4%)                             |
| LEVOTHYROXINE                                                         | 1 (1%)            | 8 (5%)                      | 3 (2%)                             |
| PREDNISON                                                             | 0                 | 0                           | 2 (1%)                             |
| CALCITONIN, SALMON                                                    | 1 (1%)            | 0                           | 0                                  |
| HYDROCORTISONE                                                        | 0                 | 1 (<1%)                     | 0                                  |
| HYDROCORTISONE VALERATE                                               | 0                 | 1 (<1%)                     | 0                                  |
| MELATONIN                                                             | 0                 | 1 (<1%)                     | 0                                  |
| THIAMAZOLE                                                            | 0                 | 0                           | 1 (<1%)                            |
| VARIOUS                                                               |                   |                             |                                    |
| Any medication                                                        | 6 (8%)            | 8 (5%)                      | 8 (6%)                             |
| CHONDROITIN                                                           | 1 (1%)            | 2 (1%)                      | 2 (1%)                             |
| AMBIGUOUS MEDICATION                                                  | 1 (1%)            | 2 (1%)                      | 0                                  |
| DIMETHYL SULFONE                                                      | 0                 | 2 (1%)                      | 1 (<1%)                            |
| PLANTAGO OVATA                                                        | 0                 | 1 (<1%)                     | 2 (1%)                             |
| ALLIUM SATIVUM                                                        | 0                 | 1 (<1%)                     | 1 (<1%)                            |
| CINNAMOMUM VERUM                                                      | 0                 | 0                           | 2 (1%)                             |
| ECHINACEA                                                             | 0                 | 1 (<1%)                     | 1 (<1%)                            |
| HERBALS NOS                                                           | 0                 | 2 (1%)                      | 0                                  |
| MONASCUS PURPUREUS                                                    | 1 (1%)            | 0                           | 1 (<1%)                            |
| ACETYLCYSTEINE                                                        | 0                 | 1 (<1%)                     | 0                                  |
| ANTIOXIDANTS NOS                                                      | 0                 | 1 (<1%)                     | 0                                  |

Note: A medication may be included in more than one ATC Level category and appear more than once.

Note: The following ingredient terms, which do not have associated ATC Level 1 terms, were also used during Post-Treatment with the following frequencies: Bovine Prostate: SAL 50mcg-1 subject, <1%, Capsicum Annuum: SAL 50mcg-1 subject, <1%, Dextroamphetamine Saccharate: Placebo-1 subject, 1%, Lactoperoxidase: Placebo-1 subject, 1%, and Zinc Arginate: SAL 50mcg-1 subject, <1%.

dln73797: /arenv/arprod/ccil8781\_gr33343/asq112989/final/drivers/cm\_t006\_noncopdpst.sas 24AUG2010 16:04

168

CONFIDENTIAL

ASQ112989

Protocol: ASQ112989  
 Population: Modified Intent-to-treat

Page 20 of 22

Table 1.25  
 Summary of Non-COPD Medications Taken Post-Treatment

| ATC Level 1<br>Ingredient       | Placebo<br>(N=75) | SAL 50mcg<br>BID<br>(N=151) | FSC<br>250/50mcg<br>BID<br>(N=139) |
|---------------------------------|-------------------|-----------------------------|------------------------------------|
| EUGENIA CARYOPHYLLATA           | 0                 | 1 (<1%)                     | 0                                  |
| GLUCOSE OXIDASE                 | 1 (1%)            | 0                           | 0                                  |
| HERBAL EXTRACTS NOS             | 0                 | 1 (<1%)                     | 0                                  |
| HYDRASTIS CANADENSIS            | 0                 | 1 (<1%)                     | 0                                  |
| LACTOFERRIN                     | 1 (1%)            | 0                           | 0                                  |
| LINUM USITATISSIMUM OIL         | 0                 | 0                           | 1 (<1%)                            |
| MEDICAGO SATIVA                 | 0                 | 1 (<1%)                     | 0                                  |
| METHIONINE                      | 0                 | 1 (<1%)                     | 0                                  |
| METHYLTHIONINIUM CHLORIDE       | 1 (1%)            | 0                           | 0                                  |
| NALOXONE HYDROCHLORIDE          | 0                 | 0                           | 1 (<1%)                            |
| OENOTHERA BIENNIS OIL           | 0                 | 0                           | 1 (<1%)                            |
| OXYGEN                          | 0                 | 0                           | 1 (<1%)                            |
| PHYTOSTEROL (NOS)               | 1 (1%)            | 0                           | 0                                  |
| SOYA LECITHIN                   | 0                 | 1 (<1%)                     | 0                                  |
| VITIS VINIFERA EXTRACT          | 0                 | 0                           | 1 (<1%)                            |
| ZEA MAYS                        | 0                 | 1 (<1%)                     | 0                                  |
| ANTIINFECTIVES FOR SYSTEMIC USE |                   |                             |                                    |
| Any medication                  | 4 (5%)            | 6 (4%)                      | 8 (6%)                             |
| AMOXICILLIN                     | 1 (1%)            | 2 (1%)                      | 0                                  |
| ACYCLOVIR                       | 0                 | 1 (<1%)                     | 1 (<1%)                            |
| METRONIDAZOLE                   | 1 (1%)            | 1 (<1%)                     | 0                                  |
| TETRACYCLINE                    | 1 (1%)            | 0                           | 1 (<1%)                            |
| AMOXICILLIN TRIHYDRATE          | 1 (1%)            | 0                           | 0                                  |
| AZITHROMYCIN                    | 0                 | 0                           | 1 (<1%)                            |

Note: A medication may be included in more than one ATC Level category and appear more than once.  
 Note: The following ingredient terms, which do not have associated ATC Level 1 terms, were also used during Post-Treatment with the following frequencies: Bovine Prostate: SAL 50mcg-1 subject, <1%, Capsicum Annum: SAL 50mcg-1 subject, <1%, Dextroamphetamine Saccharate: Placebo-1 subject, 1%, Lactoperoxidase: Placebo-1 subject, 1%, and Zinc Arginate: SAL 50mcg-1 subject, <1%.  
 dln73797: /arenv/arprod/ccil8781\_gr33343/asq112989/final/drivers/cm\_t006\_noncopdpst.sas 24AUG2010 16:04

169

CONFIDENTIAL

ASQ112989

Protocol: ASQ112989  
Population: Modified Intent-to-treat

Page 21 of 22

Table 1.25  
Summary of Non-COPD Medications Taken Post-Treatment

| ATC Level 1<br>Ingredient                     | Placebo<br>(N=75) | SAL 50mcg<br>BID<br>(N=151) | FSC<br>250/50mcg<br>BID<br>(N=139) |
|-----------------------------------------------|-------------------|-----------------------------|------------------------------------|
| BENZYLPENICILLIN                              | 0                 | 0                           | 1 (<1%)                            |
| CLAVULANATE POTASSIUM                         | 1 (1%)            | 0                           | 0                                  |
| CLINDAMYCIN                                   | 0                 | 1 (<1%)                     | 0                                  |
| DOXYCYCLINE                                   | 0                 | 1 (<1%)                     | 0                                  |
| EFAVIRENZ                                     | 0                 | 1 (<1%)                     | 0                                  |
| EMTRICITABINE                                 | 0                 | 1 (<1%)                     | 0                                  |
| IMMUNOGLOBULINS NOS                           | 0                 | 0                           | 1 (<1%)                            |
| KETOCONAZOLE                                  | 0                 | 0                           | 1 (<1%)                            |
| LEVOFLOXACIN                                  | 0                 | 1 (<1%)                     | 0                                  |
| LYSOZYME                                      | 1 (1%)            | 0                           | 0                                  |
| METHENAMINE                                   | 1 (1%)            | 0                           | 0                                  |
| TENOFOVIR DISOPROXIL<br>FUMARATE              | 0                 | 1 (<1%)                     | 0                                  |
| TETANUS TOXOID                                | 0                 | 0                           | 1 (<1%)                            |
| VALACICLOVIR HYDROCHLORIDE                    | 0                 | 0                           | 1 (<1%)                            |
| ANTINEOPLASTIC AND<br>IMMUNOMODULATING AGENTS |                   |                             |                                    |
| Any medication                                | 2 (3%)            | 4 (3%)                      | 6 (4%)                             |
| ESTRADIOL                                     | 1 (1%)            | 2 (1%)                      | 1 (<1%)                            |
| ESTROGENS CONJUGATED                          | 0                 | 0                           | 2 (1%)                             |
| TAMOXIFEN                                     | 0                 | 1 (<1%)                     | 1 (<1%)                            |
| BEVACIZUMAB                                   | 0                 | 0                           | 1 (<1%)                            |
| CICLOSPORIN                                   | 0                 | 1 (<1%)                     | 0                                  |
| INTERFERON BETA                               | 0                 | 0                           | 1 (<1%)                            |
| RALOXIFENE HYDROCHLORIDE                      | 1 (1%)            | 0                           | 0                                  |

Note: A medication may be included in more than one ATC Level category and appear more than once.  
Note: The following ingredient terms, which do not have associated ATC Level 1 terms, were also used during Post-Treatment with the following frequencies: Bovine Prostate: SAL 50mcg-1 subject, <1%, Capsicum Annum: SAL 50mcg-1 subject, <1%, Dextroamphetamine Saccharate: Placebo-1 subject, 1%, Lactoperoxidase: Placebo-1 subject, 1%, and Zinc Arginate: SAL 50mcg-1 subject, <1%.  
dln73797: /arenv/arprod/ccil18781\_gr33343/asq112989/final/drivers/cm\_t006\_noncopdpst.sas 24AUG2010 16:04

Protocol: ASQ112989  
 Population: Modified Intent-to-treat

Page 22 of 22

Table 1.25  
 Summary of Non-COPD Medications Taken Post-Treatment

| ATC Level 1<br>Ingredient                              | Placebo<br>(N=75) | SAL 50mcg<br>BID<br>(N=151) | FSC<br>250/50mcg<br>BID<br>(N=139) |
|--------------------------------------------------------|-------------------|-----------------------------|------------------------------------|
| ANTIPARASITIC PRODUCTS,<br>INSECTICIDES AND REPELLENTS |                   |                             |                                    |
| Any medication                                         | 1 (1%)            | 1 (<1%)                     | 0                                  |
| METRONIDAZOLE                                          | 1 (1%)            | 1 (<1%)                     | 0                                  |

171

Note: A medication may be included in more than one ATC Level category and appear more than once.  
 Note: The following ingredient terms, which do not have associated ATC Level 1 terms, were also used during Post-Treatment with the following frequencies: Bovine Prostate: SAL 50mcg-1 subject, <1%, Capsicum Annum: SAL 50mcg-1 subject, <1%, Dextroamphetamine Saccharate: Placebo-1 subject, 1%, Lactoperoxidase: Placebo-1 subject, 1%, and Zinc Arginate: SAL 50mcg-1 subject, <1%.  
 dln73797: /arenv/arprod/ccil8781\_gr33343/asq112989/final/drivers/cm\_t006\_noncopdpst.sas 24AUG2010 16:04

CONFIDENTIAL

ASQ112989

Protocol: ASQ112989  
Population: Modified Intent-to-treat

Table 1.26  
Summary of Treatment Compliance

| Compliance (%) | Placebo<br>(N=75) | SAL 50mcg BID<br>(N=151) | FSC 250/50mcg<br>BID<br>(N=139) | Total<br>(N=365) |
|----------------|-------------------|--------------------------|---------------------------------|------------------|
| n              | 74                | 141                      | 132                             | 347              |
| Mean           | 101.1             | 96.4                     | 93.6                            | 96.3             |
| SD             | 54.81             | 16.57                    | 16.41                           | 29.23            |
| Median         | 97.0              | 98.8                     | 97.0                            | 97.7             |
| Min.           | 39                | 24                       | 13                              | 13               |
| Max.           | 545               | 150                      | 140                             | 545              |
| <80%           | 11 (15%)          | 13 (9%)                  | 20 (15%)                        | 44 (13%)         |
| >=80% to <100% | 31 (42%)          | 60 (43%)                 | 56 (42%)                        | 147 (42%)        |
| 100%           | 20 (27%)          | 35 (25%)                 | 38 (29%)                        | 93 (27%)         |
| >100% to <110% | 4 (5%)            | 21 (15%)                 | 9 (7%)                          | 34 (10%)         |
| >=110%         | 8 (11%)           | 12 (9%)                  | 9 (7%)                          | 29 (8%)          |

Note: Percentage compliance is calculated as  
(number of doses taken)/(2x (number of days in treatment period))x100  
dln73797: /arenv/arprod/ccil8781\_gr33343/asq112989/final/drivers/cp\_t001\_sum.sas 27JUL2010 20:14

CONFIDENTIAL

ASQ112989

1  
2  
3  
4  
5  
6  
7  
8  
9  
10  
11  
12  
13  
14  
15  
16  
17  
18  
19  
20  
21  
22  
23  
24  
25  
26  
27  
28  
29  
30  
31  
32  
33  
34  
35  
36  
37  
38  
39  
40  
41  
42  
43  
44  
45  
46  
47  
48  
49

172



1  
2  
3  
4  
5 Protocol: ASQ112989  
6 Population: Modified Intent-to-treat

Page 1 of 1

7 Table 1.27  
8 Summary of Inhaler Malfunctions

9  
10  
11  
12  
13  
14  
15  
16  
17 No data to report  
18  
19  
20  
21  
22  
23  
24  
25  
26  
27  
28  
29  
30  
31  
32  
33  
34  
35  
36  
37  
38  
39  
40  
41  
42  
43  
44  
45  
46  
47  
48  
49

For peer review only

173

dln73797: /arenv/arprod/ccil8781\_gr33343/asq112989/final/drivers/dv\_t001\_sum.sas 27JUL2010 20:12

CONFIDENTIAL

ASQ112989

Protocol: ASQ112989  
Population: Run-in

Figure 2.01  
Scatter Plot of SOBDA Score at Run-in Week 2 vs Run-in Week 1 - Subjects with response of 'no change' on second weekly PGAC assessment (on the day of or prior to Visit 2)



174

CONFIDENTIAL

ASQ112989

sam31676: /arenv/arprod/cci18781\_gr33343/asq112989/final/drivers/sobda\_f001f.sas 12OCT2011 16:25

Protocol: ASQ112989  
Population: Run-in

Figure 2.02  
Scatter Plot of SOBDA Baseline Score vs Physician-Completed mMRC Score at Visit 2



0 = Not troubled with breathlessness except with strenuous exercise; 1 = Troubled by shortness of breath when hurrying on level/walking up slight hill; 2 = Walks slower than others of same age on level b/c breathlessness; 3 = Stops to breathe after walking about 100 yards/meters or after few min on level; 4 = Too breathless to leave house or breathless when dressing or undressing  
sam31676: /arenv/arprod/cci18781\_gr33343/asq112989/final/drivers/sobda\_f002f.sas 12OCT2011 16:25

CONFIDENTIAL

ASQ112989

Protocol: ASQ112989  
Population: Run-in

Figure 2.03  
Scatter Plot of SOBDA Baseline Score vs Participant-Completed mMRC Score at Visit 2



0 = Not troubled with breathlessness except with strenuous exercise; 1 = Troubled by shortness of breath when hurrying on level/walking up slight hill; 2 = Walks slower than others of same age on level b/c breathlessness; 3 = Stops to breathe after walking about 100 yards/meters or after few min on level; 4 = Too breathless to leave house or breathless when dressing or undressing

sam31676: /arenv/arprod/cci18781\_gr33343/asq112989/final/drivers/sobda\_f003f.sas 12OCT2011 16:25

CONFIDENTIAL

ASQ112989

Protocol: ASQ112989  
Population: Run-in

Figure 2.04  
Scatter Plot of SOBDA Baseline Score vs CRQ-SAS Dyspnoea Domain Score at Visit 2

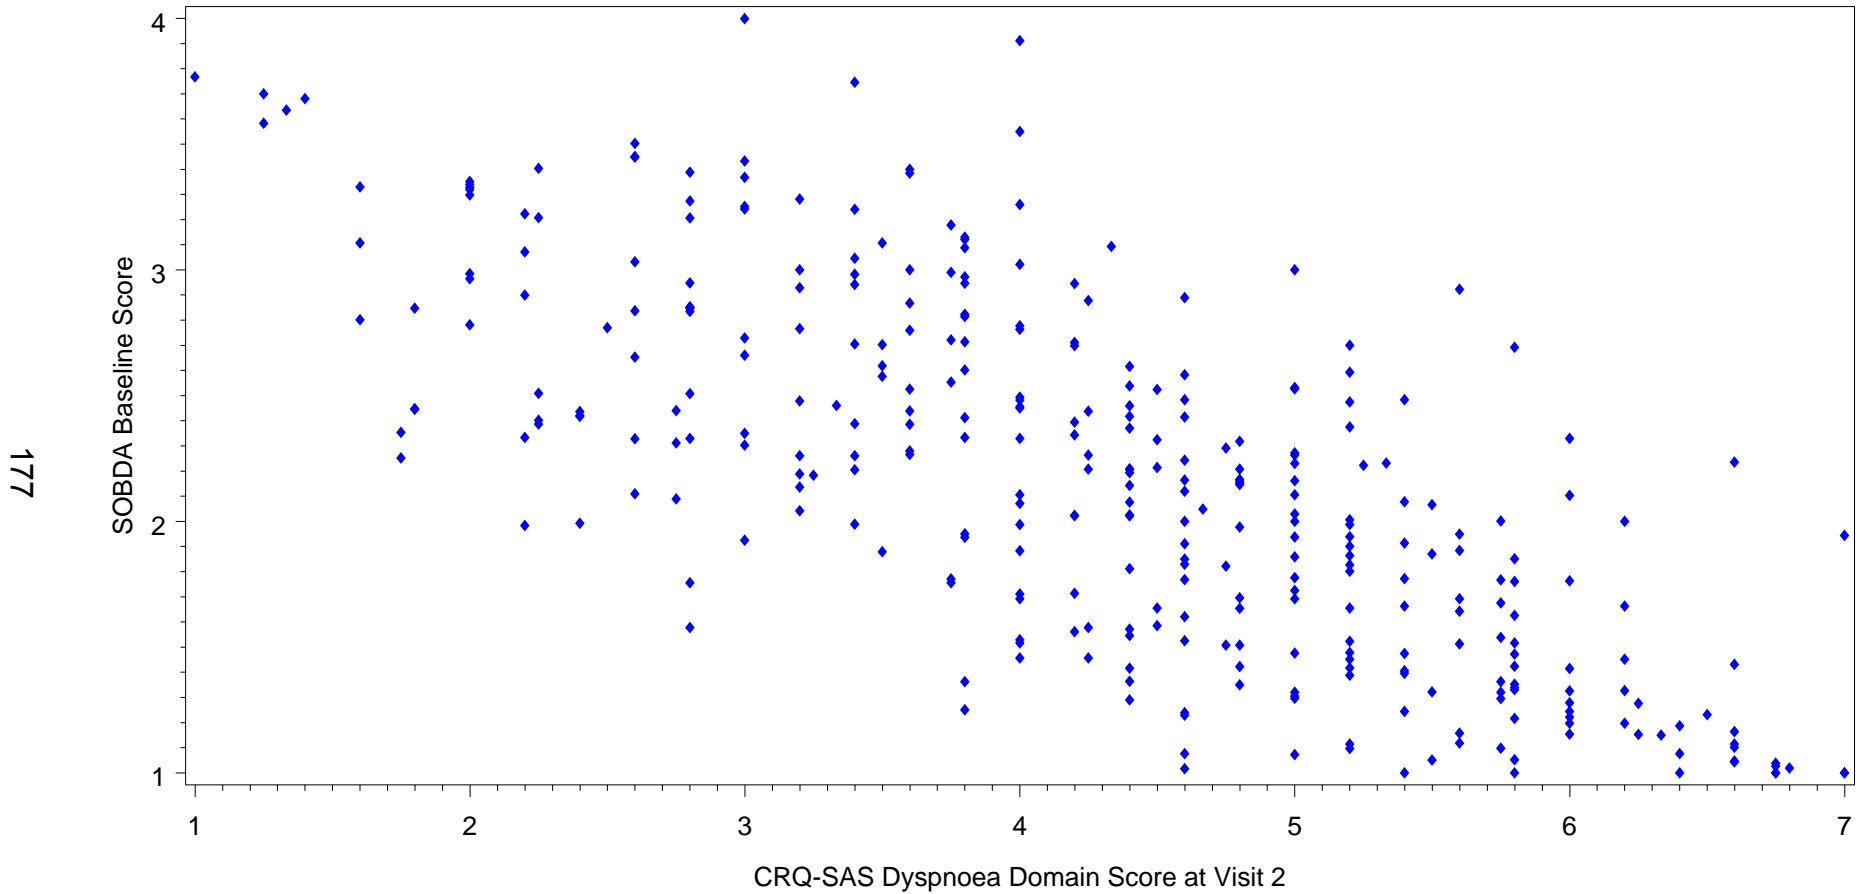

The CRQ-SAS dyspnoea domain score is the average of questions 1 - 'Feeling emotional, angry or upset'; 2 - 'Taking care of your basic needs'; 3 - 'Walking'; 4 - 'Performing household chores'; and 5 - 'Participate in social activities'. Responses to each question are coded as 1 = 'Extremely short of breath'; 2 = 'Very short of breath'; 3 = 'Quite a bit short of breath'; 4 = 'Moderate short of breath'; 5 = 'Some shortness of breath'; 6 = 'A little shortness of breath'; 7 = 'Not at all short of breath'.  
sam31676: /arenv/arprod/cc18781\_gr33343/asq112989/final/drivers/sobda\_f004f.sas 12OCT2011 16:25

CONFIDENTIAL

ASQ112989

Protocol: ASQ112989  
Population: Run-in

Figure 2.05  
Scatter Plot of SOBDA Baseline Score vs CGI-S Score at Visit 2



0 = Not troubled with breathlessness except with strenuous exercise; 1 = Troubled by shortness of breath when hurrying on level/walking up slight hill; 2 = Walks slower than others of same age on level b/c breathlessness; 3 = Stops to breathe after walking about 100 yards/meters or after few min on level; 4 = Too breathless to leave house or breathless when dressing or undressing

sam31676: /arenv/arprod/cci18781\_gr33343/asq112989/final/drivers/sobda\_f005f.sas 12OCT2011 16:25

CONFIDENTIAL

ASQ112989

Protocol: ASQ112989  
Population: Modified Intent-to-treat

Figure 2.06  
SOBDA Weekly Scores by CGI-C Response at Visit 3/PD

179



CGI-C responder is defined as a subject who had a response of "better" or "much better".  
A CGI-C non-responder is defined as a subject who had a response of "much worse", "worse" or "no change".  
sam31676: /arenv/arprod/cci18781\_gr33343/asq112989/final/drivers/sobda\_f006f.sas 12OCT2011 16:25

CONFIDENTIAL

ASQ112989

Protocol: ASQ112989  
Population: Modified Intent-to-treat

Figure 2.07  
SOBDA Weekly Scores by CRQ-SAS Dyspnoea Domain Response at Visit 3/PD



A CRQ-SAS dyspnoea domain responder is defined as a subject who had a change in score for the dyspnoea domain of the CRQ-SAS between Visit 2 and Visit 3/PD of 0.5 units or more. A CRQ-SAS dyspnoea domain non-responder is defined as a subject who had a change in score of less than 0.5 units.  
sam31676: /arenv/arprod/cci18781\_gr33343/asq112989/final/drivers/sobda\_f007f.sas 12OCT2011 16:25

CONFIDENTIAL

ASQ112989



Protocol: ASQ112989  
Population: Modified Intent-to-treat

Figure 2.08  
SOBDA Weekly Scores by Physician-Completed mMRC Response at Visit 3/PD

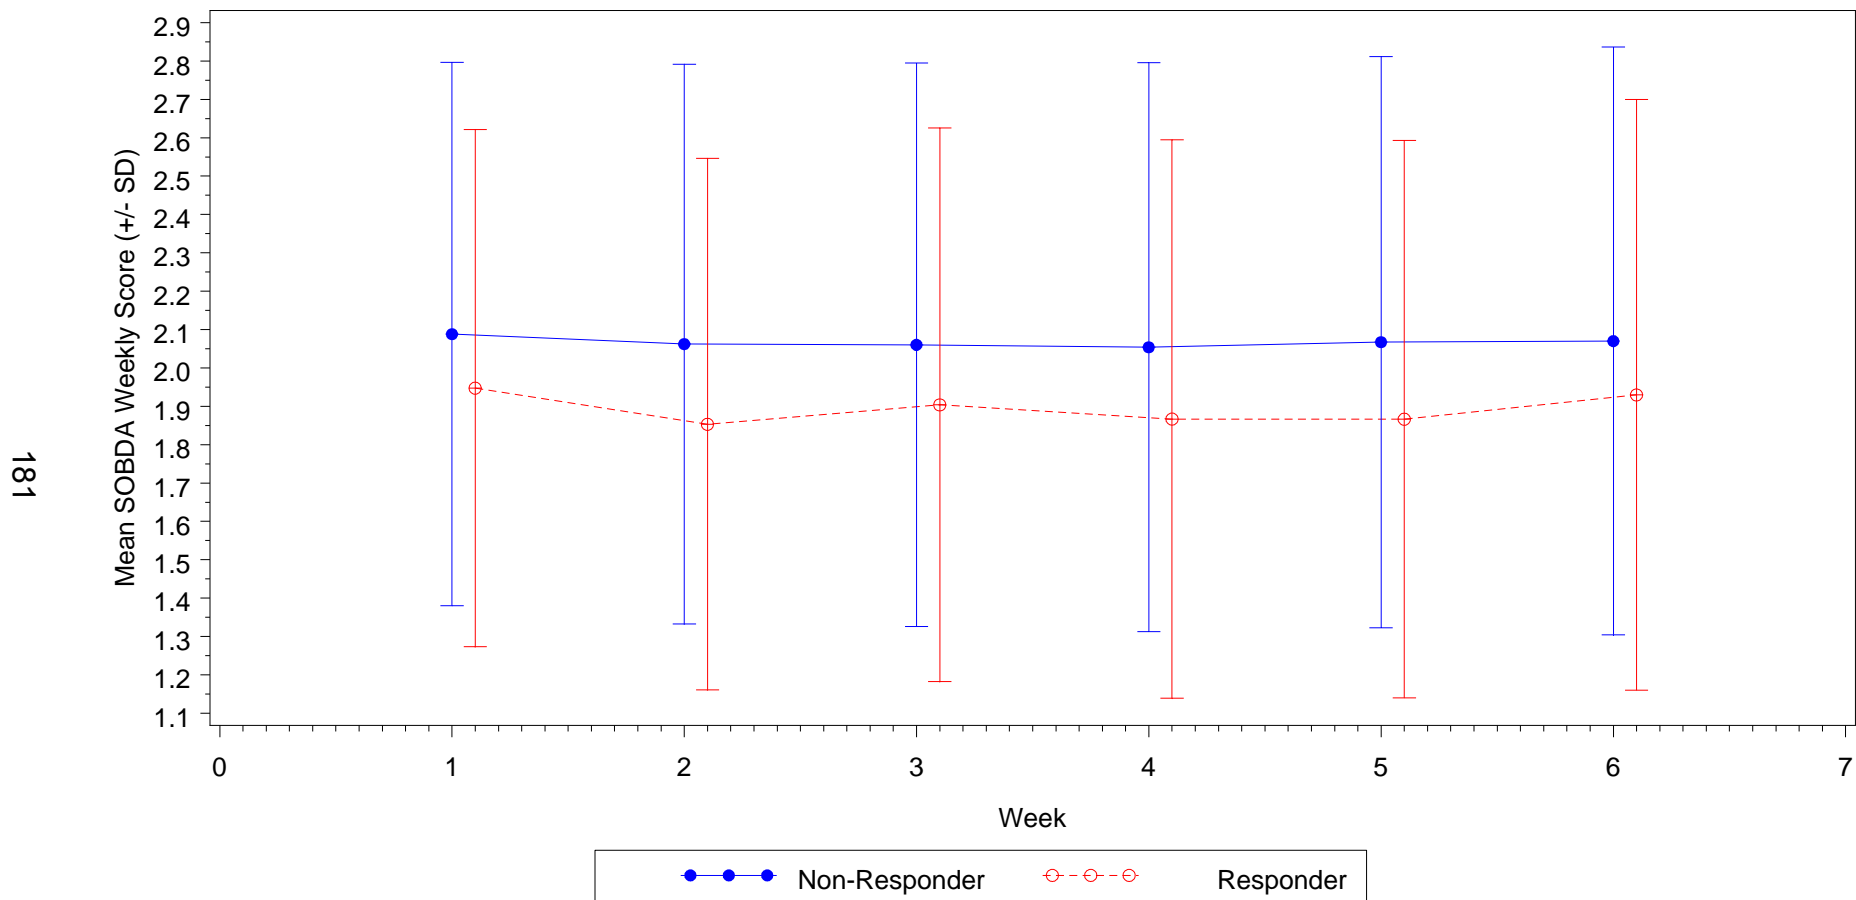

A physician-completed mMRC responder is defined as a subject who had a change in score between Visit 2 and Visit 3/PD of 1 unit or more. A physician-completed mMRC non-responder is defined as a subject who had a change of less than 1 unit.  
sam31676: /arenv/arprod/cci18781\_gr33343/asq112989/final/drivers/sobda\_f008f.sas 12OCT2011 16:25

CONFIDENTIAL

ASQ112989

Protocol: ASQ112989  
Population: Modified Intent-to-treat

Figure 2.09  
SOBDA Weekly Scores by Participant-Completed mMRC Response at Visit 3/PD

182



A participant-completed mMRC responder is defined as a subject who had a change in score between Visit 2 and Visit 3/PD of 1 unit or more. A participant-completed mMRC non-responder is defined as a subject who had a change of less than 1 unit.  
sam31676: /arenv/arprod/cci18781\_gr33343/asq112989/final/drivers/sobda\_f009f.sas 12OCT2011 16:25

CONFIDENTIAL

ASQ112989

Protocol: ASQ112989  
Population: Modified Intent-to-treat

Figure 2.10  
Cumulative Distribution Plot of Change from Baseline to Week 1 SOBDA Score by PGAC Response Categories at Study Day 8

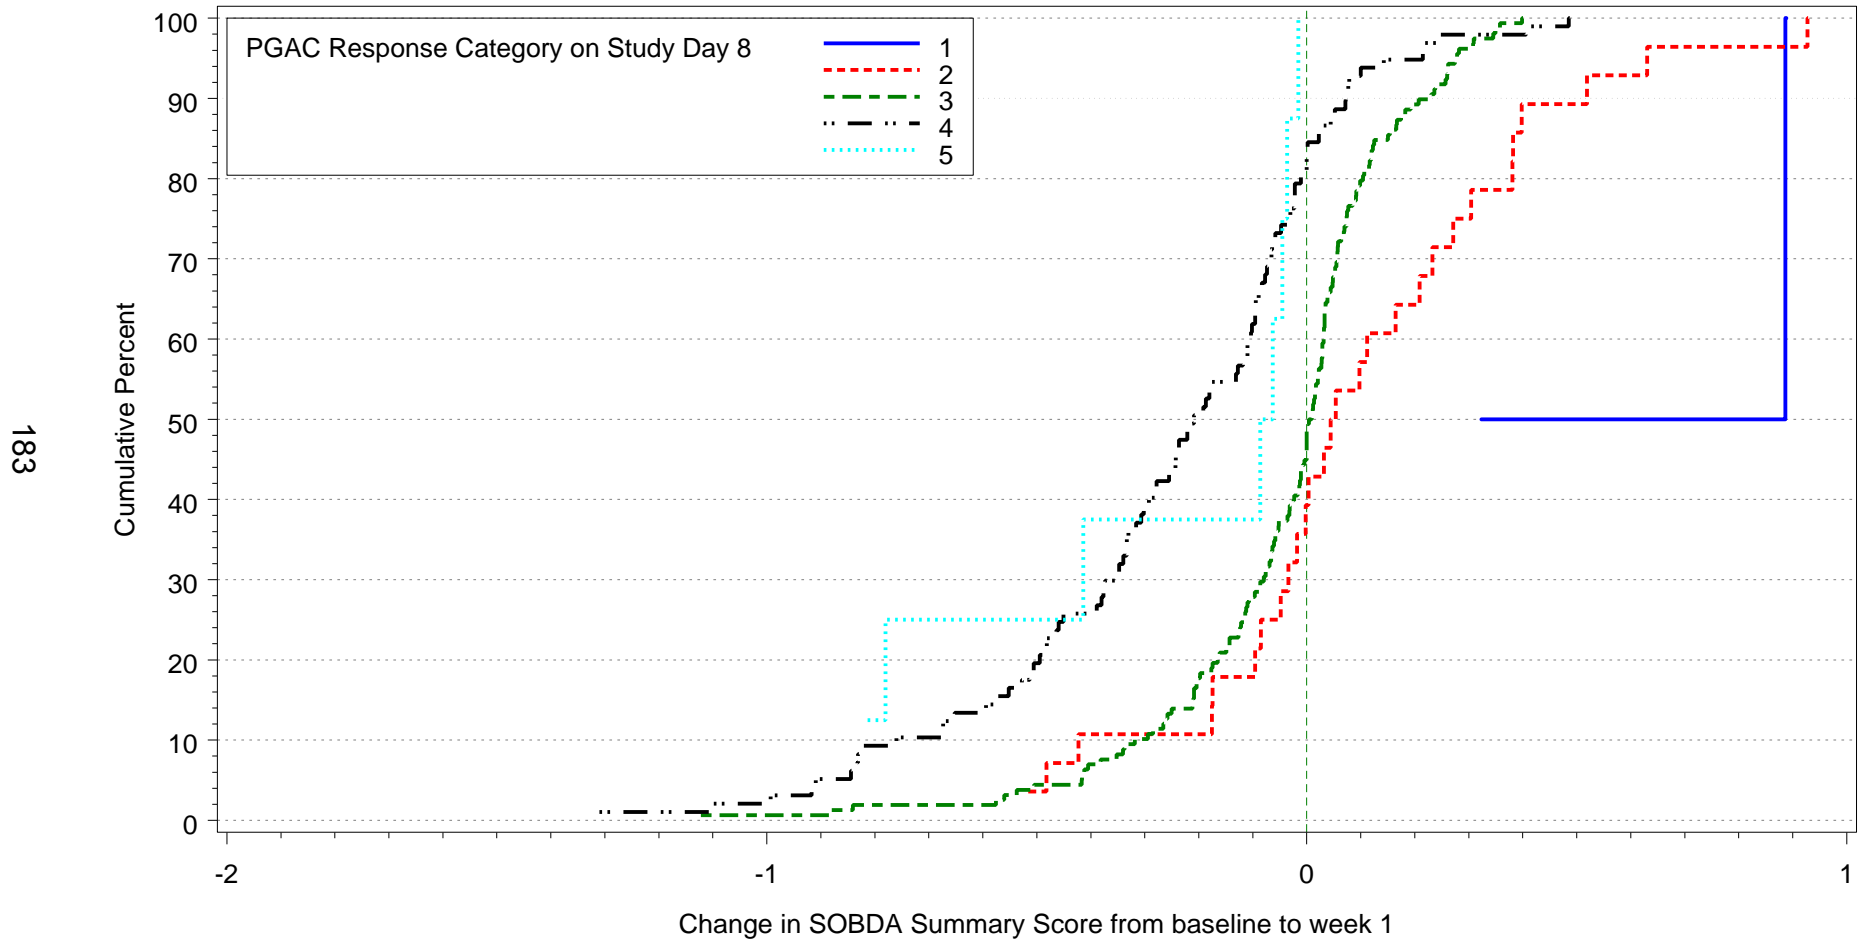

PGAC response categories: 1 = "Much worse"; 2 = "Worse"; 3 = "No change"; 4 = "Better"; 5 = "Much better"  
sam31676: /arenv/arprod/cci18781\_gr33343/asq112989/final/drivers/sobda\_f010f.sas 12OCT2011 16:25

CONFIDENTIAL

ASQ112989

Protocol: ASQ112989  
Population: Modified Intent-to-treat

Figure 2.11  
Cumulative Distribution Plot of Change from Week 1 to Week 2 SOBDA Score by PGAC Response Categories at Study Day 15

184



PGAC response categories: 1 = "Much worse"; 2 = "Worse"; 3 = "No change"; 4 = "Better"; 5 = "Much better"  
sam31676: /arenv/arprod/cci18781\_gr33343/asq112989/final/drivers/sobda\_f011f.sas 12OCT2011 16:25

CONFIDENTIAL

ASQ112989

Protocol: ASQ112989  
Population: Modified Intent-to-treat

Figure 2.12  
Cumulative Distribution Plot of Change from Week 2 to Week 3 SOBDA Score by PGAC Response Categories at Study Day 22

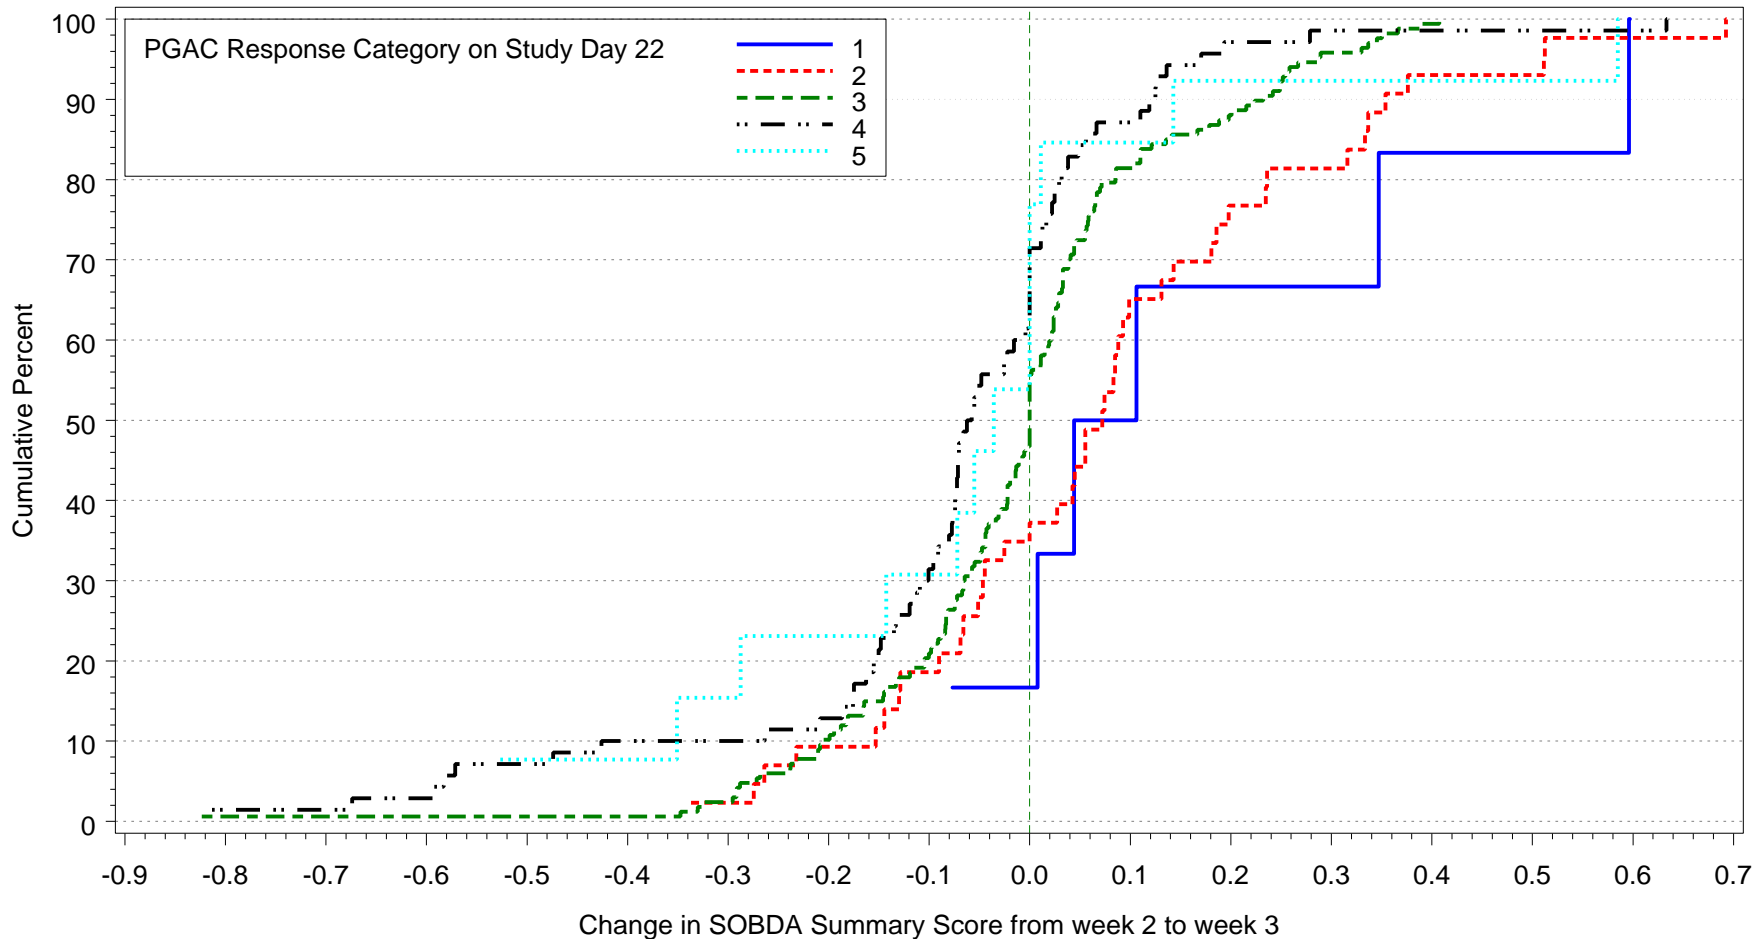

PGAC response categories: 1 = "Much worse"; 2 = "Worse"; 3 = "No change"; 4 = "Better"; 5 = "Much better"  
sam31676: /arenv/arprod/cc18781\_gr33343/asq112989/final/drivers/sobda\_f012f.sas 12OCT2011 16:25

185

1  
2  
3  
4  
5  
6  
7  
8  
9  
10  
11  
12  
13  
14  
15  
16  
17  
18  
19  
20  
21  
22  
23  
24  
25  
26  
27  
28  
29  
30  
31  
32  
33  
34  
35  
36  
37  
38  
39  
40  
41  
42  
43  
44  
45  
46  
47  
48  
49

Protocol: ASQ112989  
Population: Modified Intent-to-treat

Figure 2.13  
Cumulative Distribution Plot of Change from Week 3 to Week 4 SOBDA Score by PGAC Response Categories at Study Day 29

186



PGAC response categories: 1 = "Much worse"; 2 = "Worse"; 3 = "No change"; 4 = "Better"; 5 = "Much better"  
sam31676: /arenv/arprod/cci18781\_gr33343/asq112989/final/drivers/sobda\_f013f.sas 12OCT2011 16:25

CONFIDENTIAL

ASQ112989

Protocol: ASQ112989  
Population: Modified Intent-to-treat

Figure 2.14  
Cumulative Distribution Plot of Change from Week 4 to Week 5 SOBDA Score by PGAC Response Categories at Study Day 36

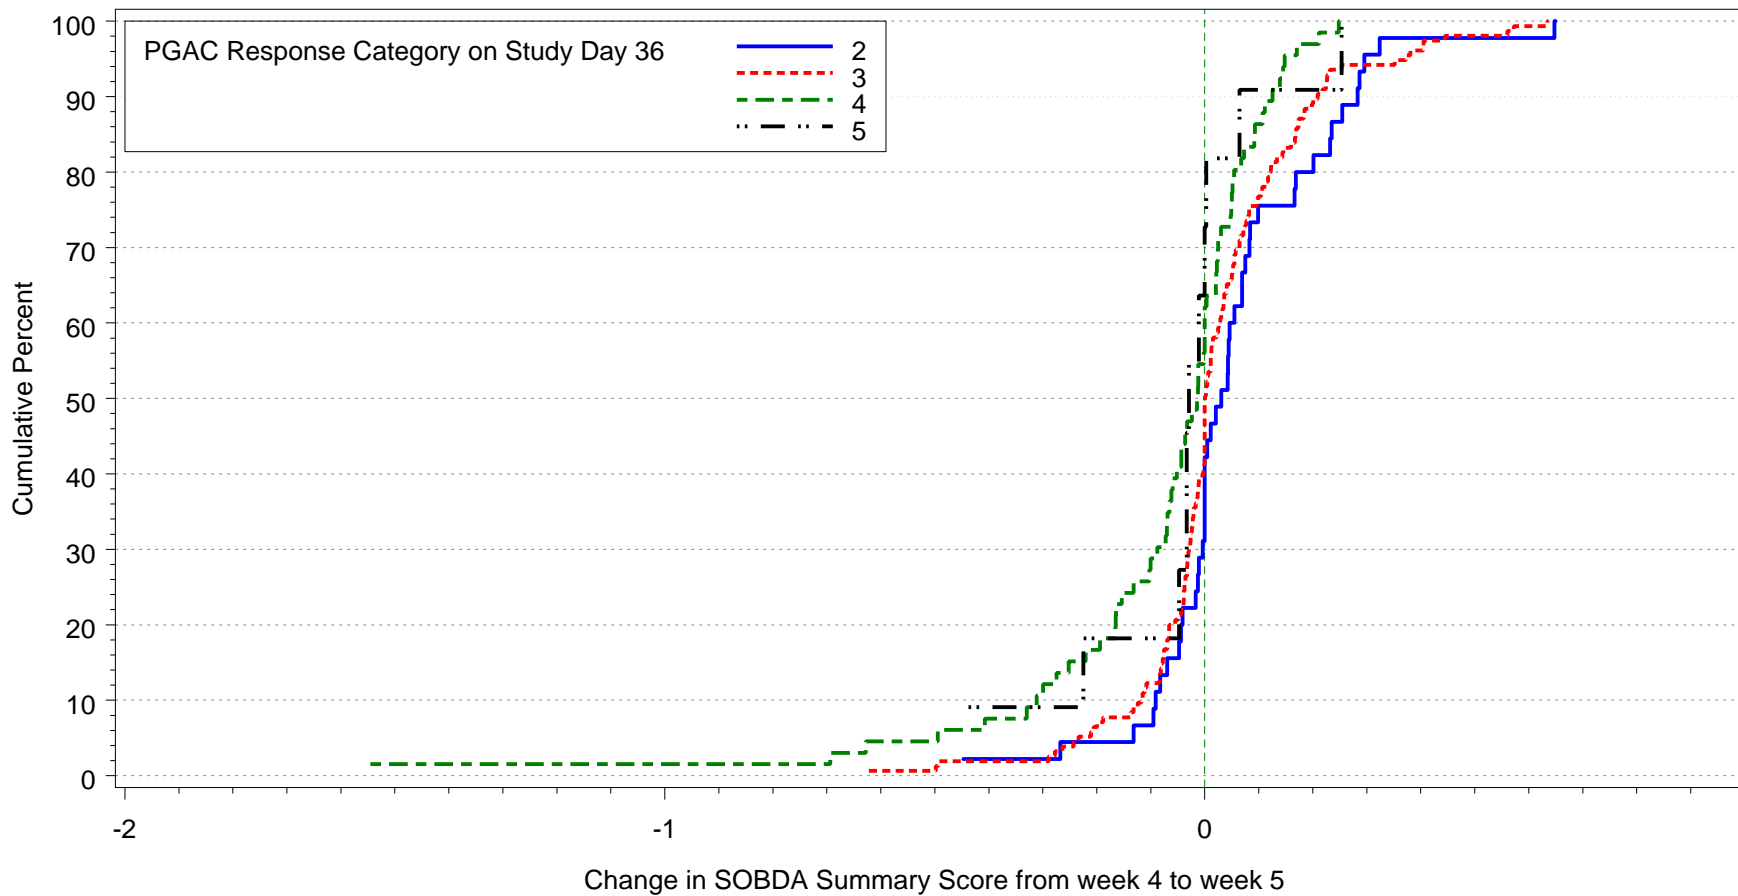

PGAC response categories: 1 = "Much worse"; 2 = "Worse"; 3 = "No change"; 4 = "Better"; 5 = "Much better"  
Note: No subjects were in the 'Much worse' category at this time point so the line colours for each category are different to those for the same category on figures at other time points.  
sam31676: /arenv/arprod/cc18781\_gr33343/asq112989/final/drivers/sobda\_f014f.sas 12OCT2011 16:25

187

CONFIDENTIAL

ASQ112989

Protocol: ASQ112989  
Population: Modified Intent-to-treat

Figure 2.15  
Cumulative Distribution Plot of Change from Week 5 to Week 6 SOBDA Score by PGAC Response Categories at Study Day 43

188



PGAC response categories: 1 = "Much worse"; 2 = "Worse"; 3 = "No change"; 4 = "Better"; 5 = "Much better"  
sam31676: /arenv/arprod/cci18781\_gr33343/asq112989/final/drivers/sobda\_f015f.sas 12OCT2011 16:25

CONFIDENTIAL

ASQ112989



Protocol: ASQ112989  
Population: Modified Intent-to-treat

Figure 2.16  
Cumulative Distribution Plot of Change from Baseline in SOBDA Last Treatment Week Score by CGI-C  
Response Categories at Visit 3/PD

189

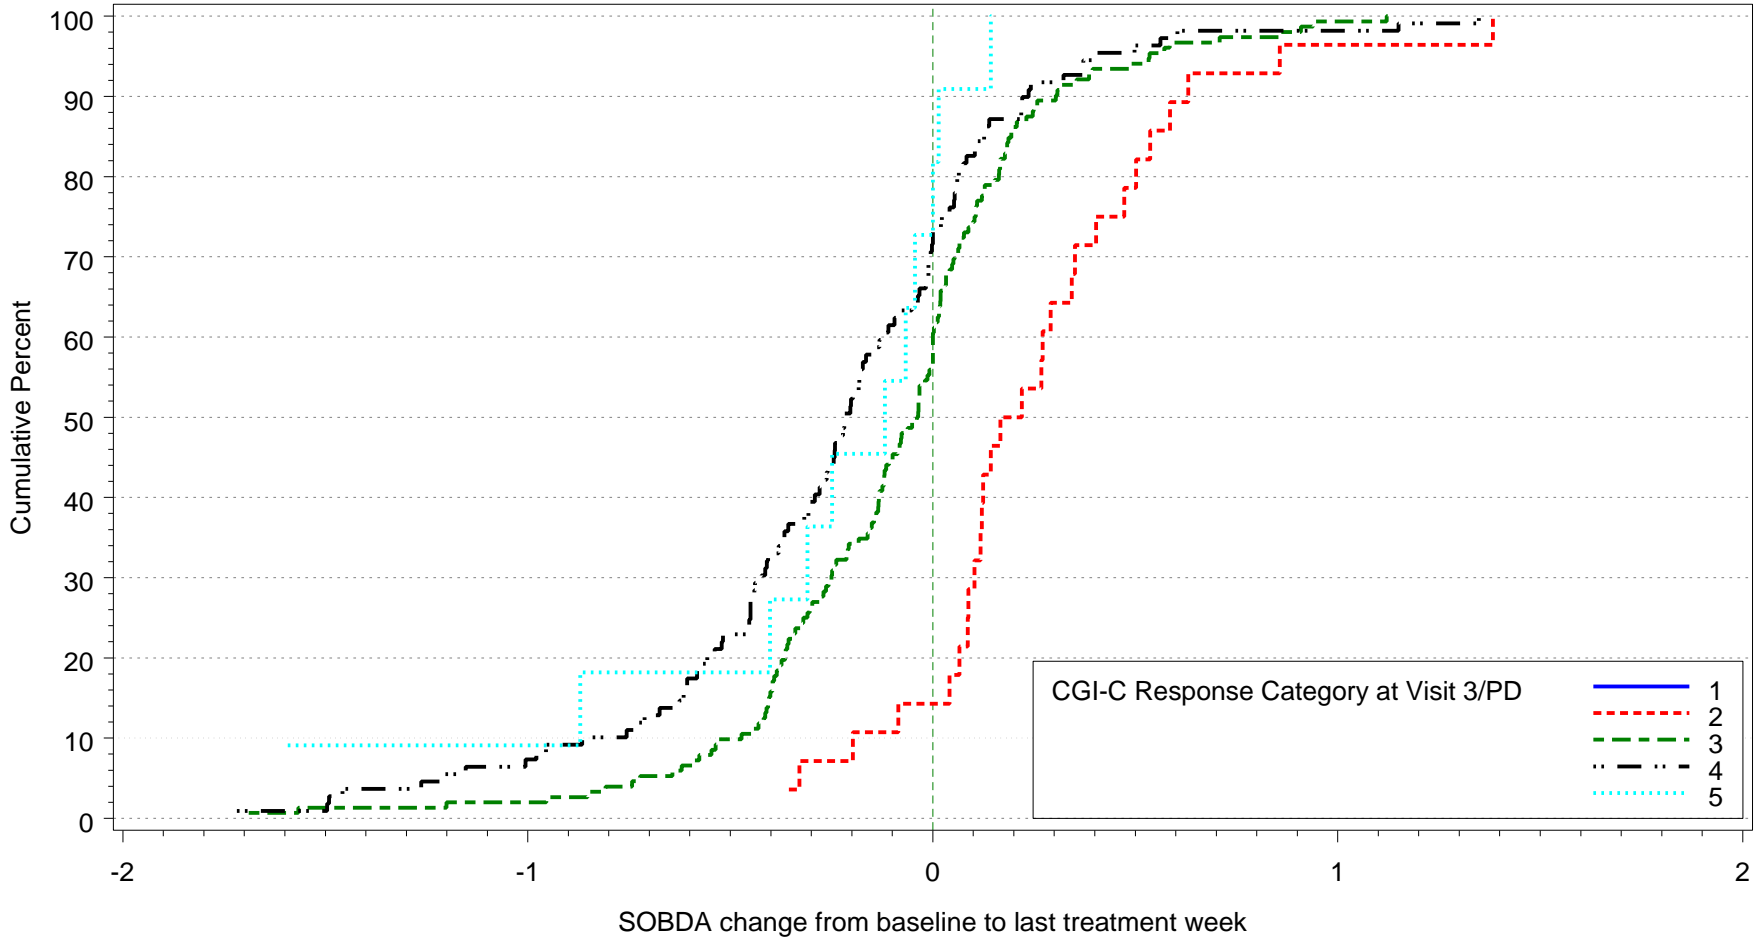

CGI-C response categories: 1 = "Much worse"; 2 = "Worse"; 3 = "No change"; 4 = "Better"; 5 = "Much better"  
sam31676: /arenv/arprod/cci18781\_gr33343/asq112989/final/drivers/sobda\_f016f.sas 12OCT2011 16:25

CONFIDENTIAL

ASQ112989

Protocol: ASQ112989  
Population: Modified Intent-to-treat

Figure 2.17  
Cumulative Distribution Plot of Percentage Change from Baseline in SOBDA Last Treatment Week Score  
by CGI-C Response Categories at Visit 3/PD

190



CGI-C response categories: 1 = "Much worse"; 2 = "Worse"; 3 = "No change"; 4 = "Better"; 5 = "Much better"  
sam31676: /arenv/arprod/cc18781\_gr33343/asq112989/final/drivers/sobda\_f017f.sas 12OCT2011 16:25

CONFIDENTIAL

ASQ112989

Protocol: ASQ112989  
Population: Modified Intent-to-treat

Figure 2.18  
Cumulative Distribution Plot of Change from Baseline in SOBDA Last Treatment Week Score by CRQ-SAS  
Dyspnoea Domain 3-Point Response Categories at Visit 3



CRQ-SAS Dyspnoea Domain 3-point response categories:  
1 = 'No change or worse' (i.e. change of  $\leq 0$  units); 2 = 'Better' (i.e. change of  $> 0-0.5$  units); 3 = 'Much better' (i.e. change of  $> 0.5$  units).  
sam31676: /arenv/arprod/cc18781\_gr33343/asq112989/final/drivers/sobda\_f018f.sas 12OCT2011 16:25

191

CONFIDENTIAL

ASQ112989

Protocol: ASQ112989  
Population: Modified Intent-to-treat

Figure 2.19  
Cumulative Distribution Plot of Percentage Change from Baseline in SOBDA Last Treatment Week Score  
by CRQ-SAS Dyspnoea Domain 3-Point Response Categories at Visit 3

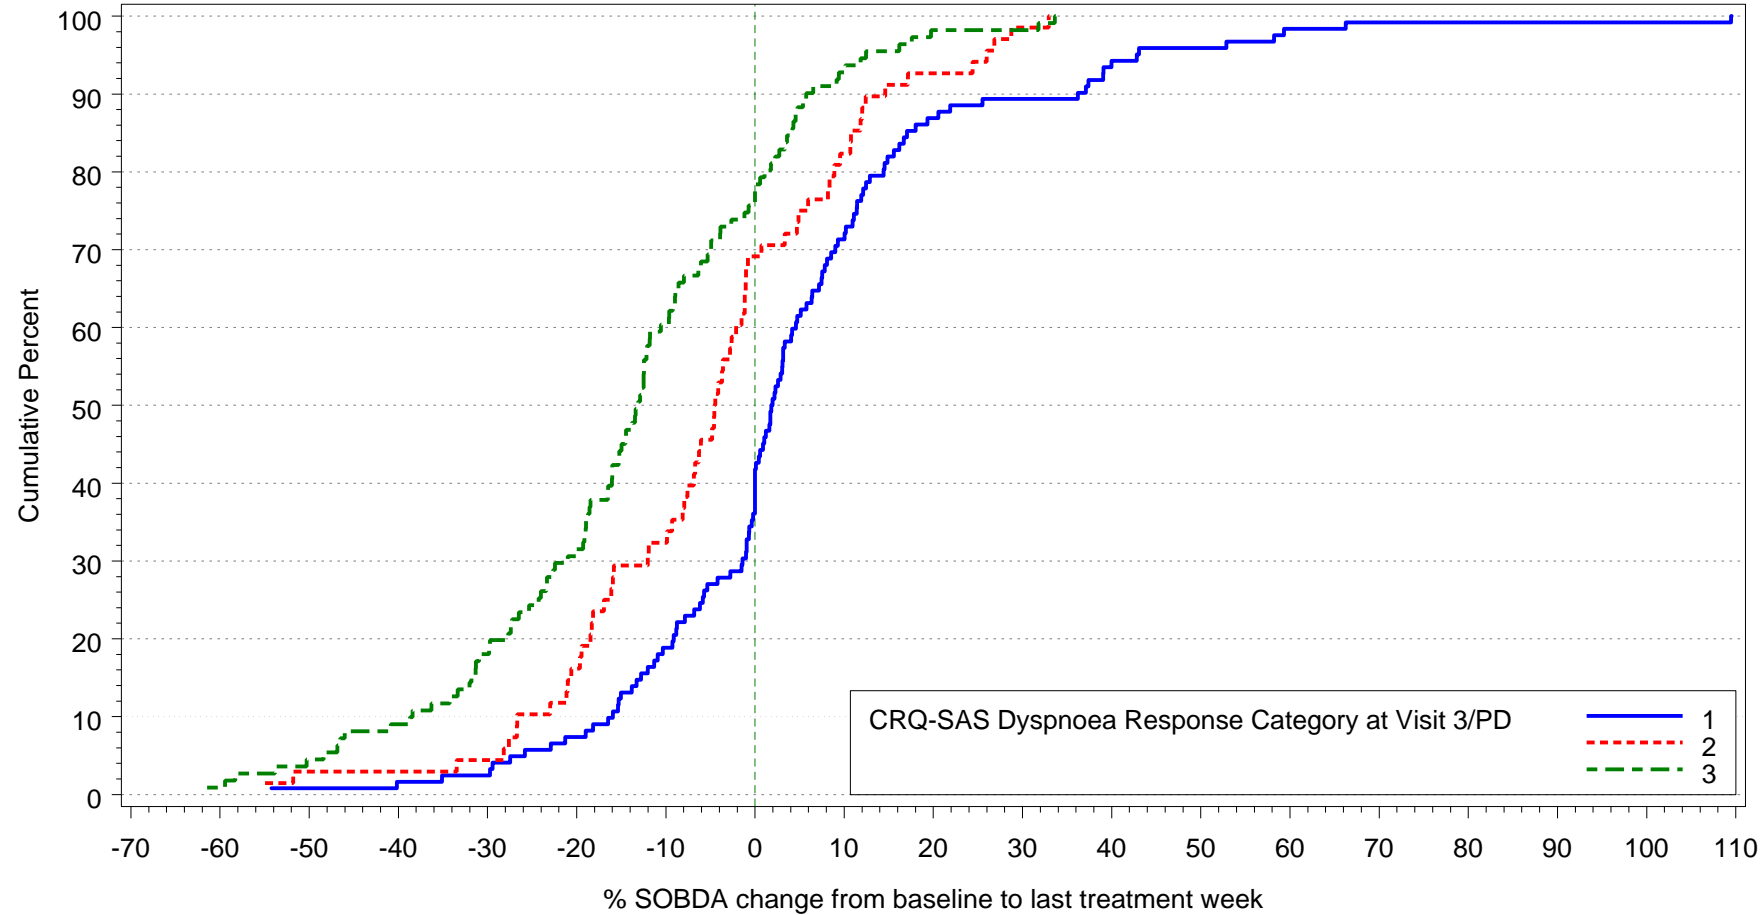

CRQ-SAS Dyspnoea Domain 3-point response categories:  
1 = 'No change or worse' (i.e. change of <=0 units); 2 = 'Better' (i.e. change of >0-0.5 units); 3 = 'Much better' (i.e. change of >0.5 units).  
sam31676: /arenv/arprod/cc18781\_gr33343/asq112989/final/drivers/sobda\_f019f.sas 12OCT2011 16:25

192

CONFIDENTIAL

ASQ112989

Protocol: ASQ112989  
Population: Modified Intent-to-treat

Figure 2.20  
Cumulative Distribution Plot of Change from Baseline in SOBDA Last Treatment Week Score by FEV1  
3-Point Response Categories at Visit 3

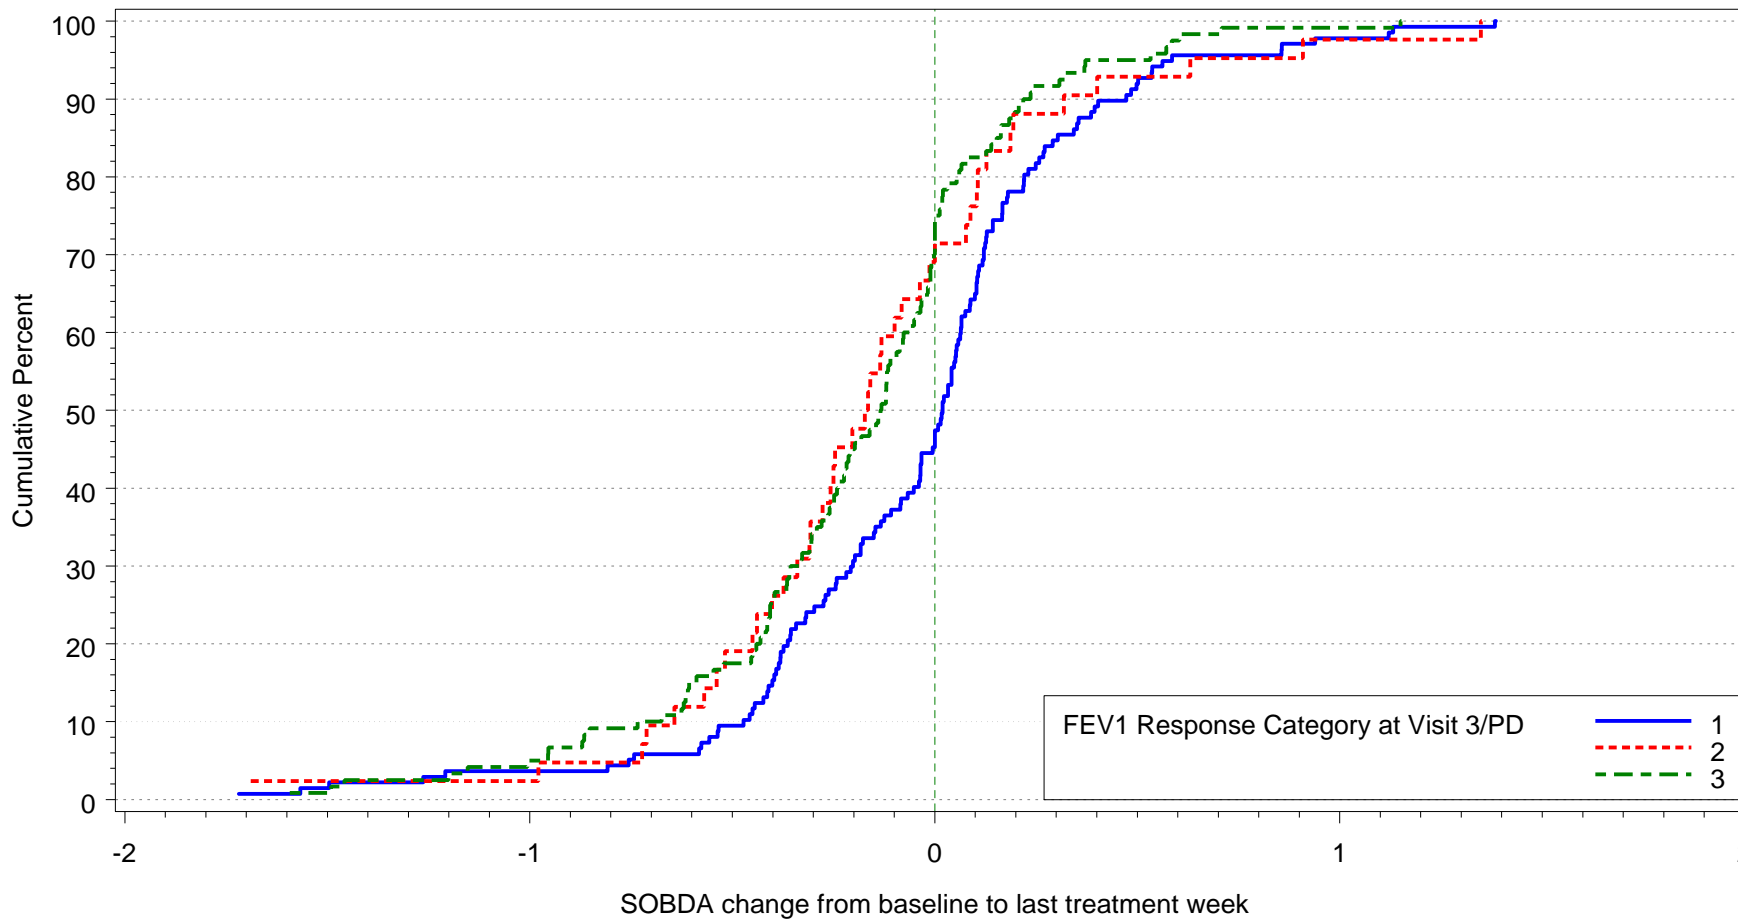

FEV1 3-point response categories:  
1 = 'No change or worse' (i.e. change of <50mL); 2 = 'Better' (i.e. change of 50-<100mL); 3 = 'Much better' (i.e. change of >=100mL).  
sam31676: /arenv/arprod/cc18781\_gr33343/asq112989/final/drivers/sobda\_f020f.sas 12OCT2011 16:25

193

CONFIDENTIAL

ASQ112989

Protocol: ASQ112989  
Population: Modified Intent-to-treat

Figure 2.21  
Cumulative Distribution Plot of Percentage Change from Baseline in SOBDA Last Treatment Week Score  
by FEV1 3-Point Response Categories at Visit 3

194



FEV1 3-point response categories:  
1 = 'No change or worse' (i.e. change of <50mL); 2 = 'Better' (i.e. change of 50-<100mL); 3 = 'Much better' (i.e. change of >=100mL).  
sam31676: /arenv/arprod/cci18781\_gr33343/asq112989/final/drivers/sobda\_f021f.sas 12OCT2011 16:25

CONFIDENTIAL

ASQ112989

1  
2  
3  
4  
5  
6  
7  
8  
9  
10  
11  
12  
13  
14  
15  
16  
17  
18  
19  
20  
21  
22  
23  
24  
25  
26  
27  
28  
29  
30  
31  
32  
33  
34  
35  
36  
37  
38  
39  
40  
41  
42  
43  
44  
45  
46  
47  
48  
49

Protocol: ASQ112989  
Population: Run-in

Page 1 of 1

Table 2.01  
SOBDA Internal Consistency: Cronbachs Alpha Value  
Subjects with a score for each SOBDA item on Day 1 of Run-in

|                                                     | All Subjects<br>(N=418) |
|-----------------------------------------------------|-------------------------|
| Subjects with score on each item on day 1 of run-in | 344 (82%)               |
| Cronbach's Alpha                                    | 0.892                   |

195

For peer review only

CONFIDENTIAL

ASQ112989

sam31676: /arenv/arprod/ccil8781\_gr33343/asq112989/final/drivers/sobda\_t001f.sas 12OCT2011 16:04

Protocol: ASQ112989  
Population: Run-in

Page 1 of 1

Table 2.02

SOBDA Test-Retest Reliability - Subjects with response of 'no change' on second weekly PGAC assessment (on the day of or prior to Visit 2)

|                                                                            |        | All Subjects<br>(N=418) |
|----------------------------------------------------------------------------|--------|-------------------------|
| -----                                                                      |        |                         |
| Subjects with response of 'no change' on second weekly PGAC assessment [1] |        | 172 (41%)               |
| Difference in SOBDA Run-in week 1 score and Run-in week 2 score            | n      | 152                     |
|                                                                            | Mean   | 0.01                    |
|                                                                            | SD     | 0.244                   |
|                                                                            | Median | -0.01                   |
|                                                                            | Min.   | -0.6                    |
|                                                                            | Max.   | 0.9                     |
| Effect size                                                                |        | 0.010                   |
| Pearson's correlation coefficient                                          |        | 0.94                    |
| Intra-class correlation coefficient                                        |        | 0.94                    |
| Estimated difference                                                       |        | 0.01                    |
| 95% confidence interval                                                    |        | (-0.03, 0.05)           |
| p-value                                                                    |        | 0.713                   |

[1] Includes PGAC assessment performed on day 14 of run-in period, providing this occurred prior to or on the same day as visit 2.

N.B. Effect size is defined as the difference between the SOBDA run-in week 1 score and SOBDA run-in week 2 divided by the standard deviation of the SOBDA run-in week 1 score.

sam31676: /arenv/arprod/ccil8781\_gr33343/asq112989/final/drivers/sobda\_t002f.sas 12OCT2011 16:04



Protocol: ASQ112989  
 Population: Run-in

Page 1 of 1

Table 2.03  
 SOBDA Convergent Validity

|                            |                                                | All<br>Subjects<br>(N=418) |
|----------------------------|------------------------------------------------|----------------------------|
| Physician-completed mMRC   | n [1]                                          | 339                        |
|                            | Spearman rank order<br>correlation coefficient | 0.24                       |
| Participant-completed mMRC | n [1]                                          | 340                        |
|                            | Spearman rank order<br>correlation coefficient | 0.29                       |
| CRQ-SAS dyspnoea domain    | n [1]                                          | 340                        |
|                            | Pearson's correlation<br>coefficient           | -0.68                      |
| CGI-S                      | n [1]                                          | 338                        |
|                            | Spearman rank order<br>correlation coefficient | 0.24                       |

197

[1] Number of subjects with a SOBDA baseline score and the relevant assessment at visit 2.  
 sam31676: /arenv/arprod/ccil8781\_gr33343/asq112989/final/drivers/sobda\_t003f.sas 12OCT2011 16:04

CONFIDENTIAL

ASQ112989

Protocol: ASQ112989  
Population: Run-in

Table 2.04

SOBDA Known Group Validity: Summary of Comparison of SOBDA Baseline Score with Physician-Completed mMRC at Visit 2

|                                |        | ----Physician-Completed mMRC Score at Visit 2 [1] ---- |       |       |       |
|--------------------------------|--------|--------------------------------------------------------|-------|-------|-------|
|                                |        | 0-1                                                    | 2     | 3     | 4     |
| Number of subjects in category |        | 13                                                     | 225   | 126   | 11    |
| SOBDA baseline score           | n      | 12                                                     | 200   | 117   | 10    |
|                                | Mean   | 1.81                                                   | 2.06  | 2.31  | 2.86  |
|                                | SD     | 0.674                                                  | 0.707 | 0.666 | 0.532 |
|                                | Median | 1.81                                                   | 2.00  | 2.33  | 2.80  |
|                                | Min    | 1.0                                                    | 1.0   | 1.0   | 2.3   |
|                                | Max    | 3.0                                                    | 3.9   | 4.0   | 3.8   |

[1] Response Categories:

0 = Not troubled with breathlessness except with strenuous exercise; 1 = Troubled by shortness of breath when hurrying on level/walking up slight hill; 2 = Walks slower than others of same age on level b/c breathlessness; 3 = Stops to breathe after walking about 100 yards/meters or after few min on level; 4 = Too breathless to leave house or breathless when dressing or undressing

sam31676: /arenv/arprod/ccil8781\_gr33343/asq112989/final/drivers/sobda\_t004f.sas 12OCT2011 16:04

198

CONFIDENTIAL

ASQ112989

Protocol: ASQ112989  
 Population: Run-in

Page 1 of 1

Table 2.05  
 SOBDA Known Group Validity: Analysis of Comparison of SOBDA Baseline Score with Physician-Completed mMRC at Visit 2

|                          |        | ----Physician-Completed mMRC Score at Visit 2 [1] ---- |                       |                        |                        |
|--------------------------|--------|--------------------------------------------------------|-----------------------|------------------------|------------------------|
|                          |        | 0-1                                                    | 2                     | 3                      | 4                      |
| n [1]                    |        | 12                                                     | 200                   | 117                    | 10                     |
| SOBDA baseline score [2] |        | 1.78<br>(0.196)                                        | 2.08<br>(0.048)       | 2.28<br>(0.063)        | 2.73<br>(0.216)        |
| Overall F-statistic      | 5.71   |                                                        |                       |                        |                        |
| p-value                  | <0.001 |                                                        |                       |                        |                        |
| Pairwise comparisons [3] |        | 0-1                                                    | -0.30<br>(-0.69,0.10) | -0.50<br>(-0.90,-0.10) | -0.95<br>(-1.52,-0.38) |
|                          |        | 2                                                      |                       | -0.20<br>(-0.36,-0.05) | -0.65<br>(-1.09,-0.22) |
|                          |        | 3                                                      |                       |                        | -0.45<br>(-0.89,-0.01) |

199

[1] Number of subjects with SOBDA baseline score, age, gender and % predicted FEV1 at Screening.

[2] Least squares mean (standard error)

[3] Difference (95% confidence interval)

[4] Response Categories:

0 = Not troubled with breathlessness except with strenuous exercise; 1 = Troubled by shortness of breath when hurrying on level/walking up slight hill; 2 = Walks slower than others of same age on level b/c breathlessness; 3 = Stops to breathe after walking about 100 yards/meters or after few min on level; 4 = Too breathless to leave house or breathless when dressing or undressing

Note: Analysis of covariance adjusted for age, gender and % predicted FEV1 at Screening.

sam31676: /arenv/arprod/ccil8781\_gr33343/asq112989/final/drivers/sobda\_t005f.sas 12OCT2011 16:04

CONFIDENTIAL

ASQ112989

Protocol: ASQ112989  
Population: Run-in

Page 1 of 1

Table 2.06  
SOBDA Known Group Validity: Summary of Comparison of SOBDA Baseline Score with Participant-Completed mMRC at Visit 2

|                                |        | -----Participant-Completed mMRC Score at Visit 2 [1] ----- |       |       |       |       |
|--------------------------------|--------|------------------------------------------------------------|-------|-------|-------|-------|
|                                |        | 0                                                          | 1     | 2     | 3     | 4     |
| Number of subjects in category |        | 15                                                         | 114   | 148   | 77    | 23    |
| SOBDA baseline score           | n      | 12                                                         | 103   | 138   | 65    | 22    |
|                                | Mean   | 1.86                                                       | 1.93  | 2.20  | 2.29  | 2.80  |
|                                | SD     | 0.804                                                      | 0.658 | 0.691 | 0.693 | 0.511 |
|                                | Median | 1.83                                                       | 1.86  | 2.20  | 2.26  | 2.64  |
|                                | Min    | 1.0                                                        | 1.0   | 1.0   | 1.1   | 2.0   |
|                                | Max    | 3.3                                                        | 3.7   | 3.9   | 4.0   | 3.8   |

[1] Response Categories:

0 = Not troubled with breathlessness except with strenuous exercise; 1 = Troubled by shortness of breath when hurrying on level/walking up slight hill; 2 = Walks slower than others of same age on level b/c breathlessness; 3 = Stops to breathe after walking about 100 yards/meters or after few min on level; 4 = Too breathless to leave house or breathless when dressing or undressing

sam31676: /arenv/arprod/ccil18781\_gr33343/asq112989/final/drivers/sobda\_t006f.sas 12OCT2011 16:04

Protocol: ASQ112989  
Population: Run-in

Page 1 of 1

Table 2.07  
SOBDA Known Group Validity: Analysis of Comparison of SOBDA Baseline Score with Participant-Completed mMRC at Visit 2

|                          |        | -----Participant-Completed mMRC Score at Visit 2 [1] ----- |                       |                        |                        |                        |
|--------------------------|--------|------------------------------------------------------------|-----------------------|------------------------|------------------------|------------------------|
|                          |        | 0                                                          | 1                     | 2                      | 3                      | 4                      |
| n [1]                    |        | 12                                                         | 103                   | 138                    | 65                     | 22                     |
| SOBDA baseline score [2] |        | 1.92<br>(0.192)                                            | 1.94<br>(0.066)       | 2.20<br>(0.056)        | 2.26<br>(0.083)        | 2.73<br>(0.142)        |
| Overall F-statistic      | 7.66   |                                                            |                       |                        |                        |                        |
| p-value                  | <0.001 |                                                            |                       |                        |                        |                        |
| Pairwise comparisons [3] |        | 0                                                          | -0.02<br>(-0.42,0.38) | -0.28<br>(-0.67,0.11)  | -0.34<br>(-0.76,0.07)  | -0.81<br>(-1.28,-0.34) |
|                          |        | 1                                                          |                       | -0.26<br>(-0.43,-0.09) | -0.32<br>(-0.53,-0.12) | -0.79<br>(-1.10,-0.48) |
|                          |        | 2                                                          |                       |                        | -0.06<br>(-0.26,0.13)  | -0.53<br>(-0.83,-0.23) |
|                          |        | 3                                                          |                       |                        |                        | -0.47<br>(-0.79,-0.15) |

[1] Number of subjects with SOBDA baseline score, age, gender and % predicted FEV1 at Screening.  
 [2] Least squares mean (standard error)  
 [3] Difference (95% confidence interval)  
 [4] Response Categories:  
 0 = Not troubled with breathlessness except with strenuous exercise; 1 = Troubled by shortness of breath when hurrying on level/walking up slight hill; 2 = Walks slower than others of same age on level b/c breathlessness; 3 = Stops to breathe after walking about 100 yards/meters or after few min on level; 4 = Too breathless to leave house or breathless when dressing or undressing  
 Note: Analysis of covariance adjusted for age, gender and % predicted FEV1 at Screening.  
 sam31676: /arenv/arprod/ccil8781\_gr33343/asq112989/final/drivers/sobda\_t007f.sas 12OCT2011 16:04

201

CONFIDENTIAL

ASQ112989

Protocol: ASQ112989  
Population: Run-in

Table 2.08

SOBDA Known Group Validity: Summary of Comparison of SOBDA Baseline Score with CGI-S at Visit 2

-Clinical Global Impression of Dyspnea at Visit 2 [1] -  
1 2 3 4

|                                |        | 1     | 2     | 3     | 4     |
|--------------------------------|--------|-------|-------|-------|-------|
| Number of subjects in category |        | 25    | 256   | 86    | 6     |
| SOBDA baseline score           |        |       |       |       |       |
|                                | n      | 19    | 236   | 78    | 5     |
|                                | Mean   | 1.85  | 2.09  | 2.40  | 2.84  |
|                                | SD     | 0.759 | 0.683 | 0.707 | 0.420 |
|                                | Median | 1.51  | 2.08  | 2.42  | 2.84  |
|                                | Min    | 1.0   | 1.0   | 1.0   | 2.4   |
|                                | Max    | 3.5   | 3.9   | 4.0   | 3.4   |

For peer review only

[1] Response Categories: 1 = Mild; 2 = Moderate; 3 = Severe; 4 = Very severe  
sam31676: /arenv/arprod/ccil8781\_gr33343/asq112989/final/drivers/sobda\_t008f.sas 12OCT2011 16:04

202

CONFIDENTIAL

ASQ112989

Protocol: ASQ112989  
 Population: Run-in

Page 1 of 1

Table 2.09

SOBDA Known Group Validity: Analysis of Comparison of SOBDA Baseline Score with CGI-S at Visit 2

---Clinical Global Impression of Dyspnea at Visit 2 [4]---

|                          | 1               | 2                     | 3                      | 4                      |
|--------------------------|-----------------|-----------------------|------------------------|------------------------|
| n [1]                    | 19              | 236                   | 78                     | 5                      |
| SOBDA baseline score [2] | 1.87<br>(0.156) | 2.11<br>(0.045)       | 2.33<br>(0.080)        | 2.72<br>(0.305)        |
| Overall F-statistic      | 3.98            |                       |                        |                        |
| p-value                  | 0.008           |                       |                        |                        |
| Pairwise comparisons [3] | 1               | -0.23<br>(-0.55,0.08) | -0.45<br>(-0.80,-0.11) | -0.84<br>(-1.52,-0.17) |
|                          | 2               |                       | -0.22<br>(-0.40,-0.04) | -0.61<br>(-1.22,-0.00) |
|                          | 3               |                       |                        | -0.39<br>(-1.01,0.23)  |

203

CONFIDENTIAL

ASQ112989

[1] Number of subjects with SOBDA baseline score, age, gender and % predicted FEV1 at Screening.  
 [2] Least squares mean (standard error)  
 [3] Difference (95% confidence interval)  
 [4] Response Categories: 1 = Mild; 2 = Moderate; 3 = Severe; 4 = Very severe  
 Note: Analysis of covariance adjusted for age, gender and % predicted FEV1 at Screening.  
 sam31676: /arenv/arprod/ccil8781\_gr33343/asq112989/final/drivers/sobda\_t009f.sas 12OCT2011 16:04

Protocol: ASQ112989  
 Population: Modified intent-to-treat

Page 1 of 1

Table 2.10

SOBDA Responsiveness: Summary of SOBDA Treatment Week 1 Score by PGAC Response at Study Day 8

|                                                       |                          | PGAC response at study day 8 [1] |                |
|-------------------------------------------------------|--------------------------|----------------------------------|----------------|
|                                                       |                          | Responders                       | Non-Responders |
| Number of subjects in category                        |                          | 115                              | 210            |
| SOBDA treatment week 1 score                          | n                        | 109                              | 200            |
|                                                       | Mean                     | 1.91                             | 2.13           |
|                                                       | SD                       | 0.733                            | 0.671          |
|                                                       | Median                   | 1.77                             | 2.16           |
|                                                       | Min                      | 1.0                              | 1.0            |
|                                                       | Max                      | 4.0                              | 3.8            |
| Change in SOBDA Summary Score from baseline to week 1 | n                        | 105                              | 188            |
|                                                       | Mean                     | -0.26                            | -0.01          |
|                                                       | SD                       | 0.324                            | 0.254          |
|                                                       | Median                   | -0.19                            | 0.01           |
|                                                       | Min                      | -1.3                             | -1.1           |
|                                                       | Max                      | 0.5                              | 0.9            |
|                                                       | Mean percentage change   | -11.71                           | 0.41           |
|                                                       | Standardised effect size | -0.34                            | -0.01          |

[1] A PGAC responder is defined as a subject who had a response of "better" or "much better".  
 A PGAC non-responder is defined as a subject who had a response of "much worse", "worse" or "no change".  
 N.B. The standardised effect size is defined as the difference between the mean baseline and mean post-treatment value divided by the standard deviation of the baseline scores.  
 sam31676: /arenv/arprod/ccil8781\_gr33343/asq112989/final/drivers/sobda\_t010f.sas 12OCT2011 16:04



Protocol: ASQ112989  
 Population: Modified intent-to-treat

Page 1 of 1

Table 2.11

SOBDA Responsiveness: Analysis of SOBDA Treatment Week 1 Score by PGAC Response at Study Day 8

|                                                           | PGAC response at study day 8 [5] |                               |
|-----------------------------------------------------------|----------------------------------|-------------------------------|
|                                                           | Responders                       | Non-Responders                |
| n [1]                                                     | 105                              | 188                           |
| Change in SOBDA Summary Score from baseline to week 1 [2] | -0.26 (0.027)                    | -0.02 (0.020)                 |
| Comparison with responders                                | Responsiveness statistic [3]     | 1.0                           |
| Comparison with responders [4]                            | Difference<br>95% CI<br>p-value  | 0.24<br>(0.18,0.31)<br><0.001 |

205

CONFIDENTIAL

ASQ112989

[1] Number of subjects with change in SOBDA score from baseline or previous week.  
 [2] Least squares mean (standard error)  
 [3] Unadjusted difference between responders and non-responders, divided by the standard deviation of non-responders.  
 [4] Analysis of covariance adjusted for age, gender and SOBDA baseline score.  
 [5] A PGAC responder is defined as a subject who had a response of "better" or "much better".  
 A PGAC non-responder is defined as a subject who had a response of "much worse", "worse" or "no change".  
 sam31676: /arenv/arprod/ccil8781\_gr33343/asq112989/final/drivers/sobda\_t011f.sas 12OCT2011 16:10

Protocol: ASQ112989  
 Population: Modified intent-to-treat

Page 1 of 1

Table 2.12

SOBDA Responsiveness: Summary of SOBDA Treatment Week 2 Score by PGAC Response at Study Day 15

|                                                     |                          | PGAC response at study day 15 [1] |                |
|-----------------------------------------------------|--------------------------|-----------------------------------|----------------|
|                                                     |                          | Responders                        | Non-Responders |
| Number of subjects in category                      |                          | 98                                | 222            |
| SOBDA treatment week 2 score                        | n                        | 94                                | 216            |
|                                                     | Mean                     | 1.79                              | 2.13           |
|                                                     | SD                       | 0.643                             | 0.752          |
|                                                     | Median                   | 1.70                              | 2.13           |
|                                                     | Min                      | 1.0                               | 1.0            |
|                                                     | Max                      | 3.8                               | 4.0            |
| Change in SOBDA Summary Score from week 1 to week 2 | n                        | 91                                | 212            |
|                                                     | Mean                     | -0.10                             | 0.01           |
|                                                     | SD                       | 0.280                             | 0.222          |
|                                                     | Median                   | -0.07                             | 0.01           |
|                                                     | Min                      | -1.8                              | -1.1           |
|                                                     | Max                      | 0.6                               | 1.0            |
|                                                     | Mean percentage change   | -5.06                             | 0.95           |
|                                                     | Standardised effect size | -0.16                             | 0.02           |

[1] A PGAC responder is defined as a subject who had a response of "better" or "much better".  
 A PGAC non-responder is defined as a subject who had a response of "much worse", "worse" or "no change".  
 N.B. The standardised effect size is defined as the difference between the mean baseline and mean post-treatment value divided by the standard deviation of the baseline scores.  
 sam31676: /arenv/arprod/ccil8781\_gr33343/asq112989/final/drivers/sobda\_t012f.sas 12OCT2011 16:04

CONFIDENTIAL

ASQ112989

Protocol: ASQ112989  
 Population: Modified intent-to-treat

Page 1 of 1

Table 2.13

SOBDA Responsiveness: Analysis of SOBDA Treatment Week 2 Score by PGAC Response at Study Day 15

|                                                         | PGAC response at study day 15 [5] |                               |
|---------------------------------------------------------|-----------------------------------|-------------------------------|
|                                                         | Responders                        | Non-Responders                |
| n [1]                                                   | 91                                | 212                           |
| Change in SOBDA Summary Score from week 1 to week 2 [2] | -0.11 (0.026)                     | 0.02 (0.017)                  |
| Comparison with responders                              | Responsiveness statistic [3]      | 0.5                           |
| Comparison with responders [4]                          | Difference<br>95% CI<br>p-value   | 0.12<br>(0.06,0.19)<br><0.001 |

207

CONFIDENTIAL

ASQ112989

[1] Number of subjects with change in SOBDA score from baseline or previous week.  
 [2] Least squares mean (standard error)  
 [3] Unadjusted difference between responders and non-responders, divided by the standard deviation of non-responders.  
 [4] Analysis of covariance adjusted for age, gender and SOBDA Treatment Week 1 score.  
 [5] A PGAC responder is defined as a subject who had a response of "better" or "much better".  
 A PGAC non-responder is defined as a subject who had a response of "much worse", "worse" or "no change".  
 sam31676: /arenv/arprod/ccil8781\_gr33343/asq112989/final/drivers/sobda\_t013f.sas 12OCT2011 16:04

Protocol: ASQ112989  
 Population: Modified intent-to-treat

Page 1 of 1

Table 2.14

SOBDA Responsiveness: Summary of SOBDA Treatment Week 3 Score by PGAC Response at Study Day 22

|                                                     |                          | PGAC response at study day 22 [1] |                |
|-----------------------------------------------------|--------------------------|-----------------------------------|----------------|
|                                                     |                          | Responders                        | Non-Responders |
| Number of subjects in category                      |                          | 90                                | 227            |
| SOBDA treatment week 3 score                        | n                        | 85                                | 220            |
|                                                     | Mean                     | 1.72                              | 2.16           |
|                                                     | SD                       | 0.663                             | 0.740          |
|                                                     | Median                   | 1.62                              | 2.10           |
|                                                     | Min                      | 1.0                               | 1.0            |
|                                                     | Max                      | 4.0                               | 4.0            |
| Change in SOBDA Summary Score from week 2 to week 3 | n                        | 83                                | 216            |
|                                                     | Mean                     | -0.08                             | 0.02           |
|                                                     | SD                       | 0.223                             | 0.183          |
|                                                     | Median                   | -0.06                             | 0.00           |
|                                                     | Min                      | -0.8                              | -0.8           |
|                                                     | Max                      | 0.6                               | 0.7            |
|                                                     | Mean percentage change   | -3.09                             | 1.23           |
|                                                     | Standardised effect size | -0.11                             | 0.02           |

[1] A PGAC responder is defined as a subject who had a response of "better" or "much better".  
 A PGAC non-responder is defined as a subject who had a response of "much worse", "worse" or "no change".  
 N.B. The standardised effect size is defined as the difference between the mean baseline and mean post-treatment value divided by the standard deviation of the baseline scores.  
 sam31676: /arenv/arprod/ccil8781\_gr33343/asq112989/final/drivers/sobda\_t014f.sas 12OCT2011 16:04

CONFIDENTIAL

ASQ112989

Protocol: ASQ112989  
 Population: Modified intent-to-treat

Page 1 of 1

Table 2.15

SOBDA Responsiveness: Analysis of SOBDA Treatment Week 3 Score by PGAC Response at Study Day 22

|                                                         | PGAC response at study day 22 [5] |                               |
|---------------------------------------------------------|-----------------------------------|-------------------------------|
|                                                         | Responders                        | Non-Responders                |
| n [1]                                                   | 83                                | 216                           |
| Change in SOBDA Summary Score from week 2 to week 3 [2] | -0.09 (0.022)                     | 0.02 (0.013)                  |
| Comparison with responders                              | Responsiveness statistic [3]      | 0.5                           |
| Comparison with responders [4]                          | Difference<br>95% CI<br>p-value   | 0.11<br>(0.06,0.16)<br><0.001 |

209

[1] Number of subjects with change in SOBDA score from baseline or previous week.  
 [2] Least squares mean (standard error)  
 [3] Unadjusted difference between responders and non-responders, divided by the standard deviation of non-responders.  
 [4] Analysis of covariance adjusted for age, gender and SOBDA Treatment Week 2 score.  
 [5] A PGAC responder is defined as a subject who had a response of "better" or "much better".  
 A PGAC non-responder is defined as a subject who had a response of "much worse", "worse" or "no change".  
 sam31676: /arenv/arprod/ccil8781\_gr33343/asq112989/final/drivers/sobda\_t015f.sas 12OCT2011 16:04

CONFIDENTIAL

ASQ112989

Protocol: ASQ112989  
 Population: Modified intent-to-treat

Page 1 of 1

Table 2.16

SOBDA Responsiveness: Summary of SOBDA Treatment Week 4 Score by PGAC Response at Study Day 29

|                                                     |                          | PGAC response at study day 29 [1] |                |
|-----------------------------------------------------|--------------------------|-----------------------------------|----------------|
|                                                     |                          | Responders                        | Non-Responders |
| Number of subjects in category                      |                          | 68                                | 236            |
| SOBDA treatment week 4 score                        | n                        | 63                                | 226            |
|                                                     | Mean                     | 1.64                              | 2.13           |
|                                                     | SD                       | 0.662                             | 0.740          |
|                                                     | Median                   | 1.36                              | 2.01           |
|                                                     | Min                      | 1.0                               | 1.0            |
|                                                     | Max                      | 4.0                               | 4.0            |
| Change in SOBDA Summary Score from week 3 to week 4 | n                        | 62                                | 223            |
|                                                     | Mean                     | -0.09                             | 0.01           |
|                                                     | SD                       | 0.198                             | 0.193          |
|                                                     | Median                   | -0.03                             | 0.00           |
|                                                     | Min                      | -0.8                              | -0.7           |
|                                                     | Max                      | 0.4                               | 1.3            |
|                                                     | Mean percentage change   | -4.20                             | 1.01           |
|                                                     | Standardised effect size | -0.12                             | 0.02           |

[1] A PGAC responder is defined as a subject who had a response of "better" or "much better".  
 A PGAC non-responder is defined as a subject who had a response of "much worse", "worse" or "no change".  
 N.B. The standardised effect size is defined as the difference between the mean baseline and mean post-treatment value divided by the standard deviation of the baseline scores.  
 sam31676: /arenv/arprod/ccil8781\_gr33343/asq112989/final/drivers/sobda\_t016f.sas 12OCT2011 16:04

CONFIDENTIAL

ASQ112989

Protocol: ASQ112989  
 Population: Modified intent-to-treat

Page 1 of 1

Table 2.17

SOBDA Responsiveness: Analysis of SOBDA Treatment Week 4 Score by PGAC Response at Study Day 29

|                                                         | PGAC response at study day 29 [5] |                               |
|---------------------------------------------------------|-----------------------------------|-------------------------------|
|                                                         | Responders                        | Non-Responders                |
| n [1]                                                   | 62                                | 223                           |
| Change in SOBDA Summary Score from week 3 to week 4 [2] | -0.10 (0.025)                     | 0.02 (0.013)                  |
| Comparison with responders                              | Responsiveness statistic [3]      | 0.5                           |
| Comparison with responders [4]                          | Difference<br>95% CI<br>p-value   | 0.11<br>(0.06,0.17)<br><0.001 |

211

CONFIDENTIAL

ASQ112989

[1] Number of subjects with change in SOBDA score from baseline or previous week.  
 [2] Least squares mean (standard error)  
 [3] Unadjusted difference between responders and non-responders, divided by the standard deviation of non-responders.  
 [4] Analysis of covariance adjusted for age, gender and SOBDA Treatment Week 3 score.  
 [5] A PGAC responder is defined as a subject who had a response of "better" or "much better".  
 A PGAC non-responder is defined as a subject who had a response of "much worse", "worse" or "no change".  
 sam31676: /arenv/arprod/ccil8781\_gr33343/asq112989/final/drivers/sobda\_t017f.sas 12OCT2011 16:04

Protocol: ASQ112989  
 Population: Modified intent-to-treat

Page 1 of 1

Table 2.18

SOBDA Responsiveness: Summary of SOBDA Treatment Week 5 Score by PGAC Response at Study Day 36

|                                                     |                          | PGAC response at study day 36 [1] |                |
|-----------------------------------------------------|--------------------------|-----------------------------------|----------------|
|                                                     |                          | Responders                        | Non-Responders |
| Number of subjects in category                      |                          | 79                                | 219            |
| SOBDA treatment week 5 score                        | n                        | 77                                | 203            |
|                                                     | Mean                     | 1.66                              | 2.16           |
|                                                     | SD                       | 0.631                             | 0.758          |
|                                                     | Median                   | 1.45                              | 2.12           |
|                                                     | Min                      | 1.0                               | 1.0            |
|                                                     | Max                      | 3.6                               | 4.0            |
| Change in SOBDA Summary Score from week 4 to week 5 | n                        | 77                                | 200            |
|                                                     | Mean                     | -0.07                             | 0.03           |
|                                                     | SD                       | 0.245                             | 0.169          |
|                                                     | Median                   | -0.01                             | 0.00           |
|                                                     | Min                      | -1.5                              | -0.6           |
|                                                     | Max                      | 0.3                               | 0.6            |
|                                                     | Mean percentage change   | -2.64                             | 2.02           |
|                                                     | Standardised effect size | -0.10                             | 0.04           |

[1] A PGAC responder is defined as a subject who had a response of "better" or "much better". A PGAC non-responder is defined as a subject who had a response of "much worse", "worse" or "no change". N.B. The standardised effect size is defined as the difference between the mean baseline and mean post-treatment value divided by the standard deviation of the baseline scores.  
 sam31676: /arenv/arprod/ccil8781\_gr33343/asq112989/final/drivers/sobda\_t018f.sas 12OCT2011 16:04

CONFIDENTIAL

ASQ112989



Protocol: ASQ112989  
 Population: Modified intent-to-treat

Page 1 of 1

Table 2.19

SOBDA Responsiveness: Analysis of SOBDA Treatment Week 5 Score by PGAC Response at Study Day 36

|                                                         | PGAC response at study day 36 [5] |                               |
|---------------------------------------------------------|-----------------------------------|-------------------------------|
|                                                         | Responders                        | Non-Responders                |
| n [1]                                                   | 77                                | 200                           |
| Change in SOBDA Summary Score from week 4 to week 5 [2] | -0.09 (0.022)                     | 0.04 (0.014)                  |
| Comparison with responders                              | Responsiveness statistic [3]      | 0.6                           |
| Comparison with responders [4]                          | Difference<br>95% CI<br>p-value   | 0.13<br>(0.08,0.18)<br><0.001 |

213

CONFIDENTIAL

ASQ112989

[1] Number of subjects with change in SOBDA score from baseline or previous week.  
 [2] Least squares mean (standard error)  
 [3] Unadjusted difference between responders and non-responders, divided by the standard deviation of non-responders.  
 [4] Analysis of covariance adjusted for age, gender and SOBDA Treatment Week 4 score.  
 [5] A PGAC responder is defined as a subject who had a response of "better" or "much better".  
 A PGAC non-responder is defined as a subject who had a response of "much worse", "worse" or "no change".  
 sam31676: /arenv/arprod/ccil8781\_gr33343/asq112989/final/drivers/sobda\_t019f.sas 12OCT2011 16:04

Protocol: ASQ112989  
 Population: Modified intent-to-treat

Page 1 of 1

Table 2.20

SOBDA Responsiveness: Summary of SOBDA Treatment Week 6 Score by PGAC Response at Study Day 43

|                                                     |                          | PGAC response at study day 43 [1] |                |
|-----------------------------------------------------|--------------------------|-----------------------------------|----------------|
|                                                     |                          | Responders                        | Non-Responders |
| Number of subjects in category                      |                          | 38                                | 96             |
| SOBDA treatment week 6 score                        | n                        | 34                                | 89             |
|                                                     | Mean                     | 1.83                              | 2.08           |
|                                                     | SD                       | 0.765                             | 0.810          |
|                                                     | Median                   | 1.75                              | 2.03           |
|                                                     | Min                      | 1.0                               | 1.0            |
|                                                     | Max                      | 4.0                               | 4.0            |
| Change in SOBDA Summary Score from week 5 to week 6 | n                        | 31                                | 88             |
|                                                     | Mean                     | -0.04                             | 0.02           |
|                                                     | SD                       | 0.167                             | 0.240          |
|                                                     | Median                   | -0.02                             | 0.00           |
|                                                     | Min                      | -0.5                              | -0.8           |
|                                                     | Max                      | 0.2                               | 1.4            |
|                                                     | Mean percentage change   | -2.66                             | 1.51           |
|                                                     | Standardised effect size | -0.06                             | 0.03           |

[1] A PGAC responder is defined as a subject who had a response of "better" or "much better".  
 A PGAC non-responder is defined as a subject who had a response of "much worse", "worse" or "no change".  
 N.B. The standardised effect size is defined as the difference between the mean baseline and mean post-treatment value divided by the standard deviation of the baseline scores.  
 sam31676: /arenv/arprod/ccil8781\_gr33343/asq112989/final/drivers/sobda\_t020f.sas 12OCT2011 16:04

CONFIDENTIAL

ASQ112989

Protocol: ASQ112989  
 Population: Modified intent-to-treat

Page 1 of 1

Table 2.21

SOBDA Responsiveness: Analysis of SOBDA Treatment Week 6 Score by PGAC Response at Study Day 43

|                                                         | PGAC response at study day 43 [5] |                               |
|---------------------------------------------------------|-----------------------------------|-------------------------------|
|                                                         | Responders                        | Non-Responders                |
| n [1]                                                   | 31                                | 88                            |
| Change in SOBDA Summary Score from week 5 to week 6 [2] | -0.04 (0.040)                     | 0.02 (0.023)                  |
| Comparison with responders                              | Responsiveness statistic [3]      | 0.3                           |
| Comparison with responders [4]                          | Difference<br>95% CI<br>p-value   | 0.06<br>(-0.03,0.15)<br>0.180 |

215

CONFIDENTIAL

ASQ112989

[1] Number of subjects with change in SOBDA score from baseline or previous week.  
 [2] Least squares mean (standard error)  
 [3] Unadjusted difference between responders and non-responders, divided by the standard deviation of non-responders.  
 [4] Analysis of covariance adjusted for age, gender and SOBDA Treatment Week 5 score.  
 [5] A PGAC responder is defined as a subject who had a response of "better" or "much better".  
 A PGAC non-responder is defined as a subject who had a response of "much worse", "worse" or "no change".  
 sam31676: /arenv/arprod/ccil8781\_gr33343/asq112989/final/drivers/sobda\_t021f.sas 12OCT2011 16:04

Protocol: ASQ112989  
 Population: Modified intent-to-treat

Page 1 of 1

Table 2.22

SOBDA Responsiveness: Summary of SOBDA Last Treatment Week Score by PGAC Response at Visit 3

|                                                         |                          | PGAC response at visit 3/PD [1] |                |
|---------------------------------------------------------|--------------------------|---------------------------------|----------------|
|                                                         |                          | Responders                      | Non-Responders |
| Number of subjects in category                          |                          | 50                              | 117            |
| SOBDA last treatment week score                         | n                        | 45                              | 110            |
|                                                         | Mean                     | 1.81                            | 1.96           |
|                                                         | SD                       | 0.803                           | 0.675          |
|                                                         | Median                   | 1.67                            | 1.98           |
|                                                         | Min                      | 1.0                             | 1.0            |
|                                                         | Max                      | 4.0                             | 3.3            |
| Change from baseline to SOBDA last treatment week score | n                        | 45                              | 106            |
|                                                         | Mean                     | -0.21                           | -0.14          |
|                                                         | SD                       | 0.497                           | 0.423          |
|                                                         | Median                   | -0.08                           | -0.09          |
|                                                         | Min                      | -1.6                            | -1.7           |
|                                                         | Max                      | 0.9                             | 1.1            |
|                                                         | Mean percentage change   | -9.82                           | -4.86          |
|                                                         | Standardised effect size | -0.30                           | -0.19          |

[1] A PGAC responder is defined as a subject who had a response of "better" or "much better". A PGAC non-responder is defined as a subject who had a response of "much worse", "worse" or "no change". N.B. The standardised effect size is defined as the difference between the mean baseline and mean post-treatment value divided by the standard deviation of the baseline scores.  
 sam31676: /arenv/arprod/ccil8781\_gr33343/asq112989/final/drivers/sobda\_t022f.sas 12OCT2011 16:04

Protocol: ASQ112989  
 Population: Modified intent-to-treat

Page 1 of 1

Table 2.23

SOBDA Responsiveness: Analysis of SOBDA Last Treatment Week Score by PGAC Response at Visit 3

|                                                       | PGAC response at visit 3/PD [5] |                |
|-------------------------------------------------------|---------------------------------|----------------|
|                                                       | Responders                      | Non-Responders |
| n [1]                                                 | 45                              | 106            |
| Change from baseline to SOBDA last treatment week [2] | -0.23 (0.063)                   | -0.15 (0.042)  |
| Comparison with responders                            | Responsiveness statistic [3]    | 0.2            |
| Comparison with responders [4]                        | Difference                      | 0.08           |
|                                                       | 95% CI                          | (-0.07,0.23)   |
|                                                       | p-value                         | 0.307          |

217

CONFIDENTIAL

ASQ112989

[1] Number of subjects with change in SOBDA score from baseline or previous week.  
 [2] Least squares mean (standard error)  
 [3] Unadjusted difference between responders and non-responders, divided by the standard deviation of non-responders.  
 [4] Analysis of covariance adjusted for age, gender and SOBDA baseline score.  
 [5] A PGAC responder is defined as a subject who had a response of "better" or "much better".  
 A PGAC non-responder is defined as a subject who had a response of "much worse", "worse" or "no change".  
 sam31676: /arenv/arprod/ccil8781\_gr33343/asq112989/final/drivers/sobda\_t023f.sas 12OCT2011 16:04

Protocol: ASQ112989  
 Population: Modified intent-to-treat

Page 1 of 1

Table 2.24

SOBDA Responsiveness: Summary of SOBDA Last Treatment Week Score by CGI-C Response at Visit 3

|                                                         |                          | CGI-C response at visit 3/PD [1] |                |
|---------------------------------------------------------|--------------------------|----------------------------------|----------------|
|                                                         |                          | Responders                       | Non-Responders |
| Number of subjects in category                          |                          | 140                              | 218            |
| SOBDA last treatment week score                         | n                        | 127                              | 192            |
|                                                         | Mean                     | 1.81                             | 2.16           |
|                                                         | SD                       | 0.691                            | 0.758          |
|                                                         | Median                   | 1.77                             | 2.09           |
|                                                         | Min                      | 1.0                              | 1.0            |
|                                                         | Max                      | 3.9                              | 4.0            |
| Change from baseline to SOBDA last treatment week score | n                        | 120                              | 181            |
|                                                         | Mean                     | -0.25                            | -0.03          |
|                                                         | SD                       | 0.484                            | 0.413          |
|                                                         | Median                   | -0.21                            | 0.00           |
|                                                         | Min                      | -1.7                             | -1.7           |
|                                                         | Max                      | 1.3                              | 1.4            |
|                                                         | Mean percentage change   | -11.03                           | -0.25          |
|                                                         | Standardised effect size | -0.38                            | -0.04          |

[1] A CGI-C responder is defined as a subject who had a response of "better" or "much better".  
 A CGI-C non-responder is defined as a subject who had a response of "much worse", "worse" or "no change".  
 N.B. The standardised effect size is defined as the difference between the mean baseline and mean post-treatment value divided by the standard deviation of the baseline scores.  
 sam31676: /arenv/arprod/ccil8781\_gr33343/asq112989/final/drivers/sobda\_t024f.sas 12OCT2011 16:05

Protocol: ASQ112989  
 Population: Modified intent-to-treat

Page 1 of 1

Table 2.25

SOBDA Responsiveness: Analysis of SOBDA Last Treatment Week Score by CGI-C Response at Visit 3

|                                                       | CGI-C response at visit 3/PD [5] |                |
|-------------------------------------------------------|----------------------------------|----------------|
|                                                       | Responders                       | Non-Responders |
| n [1]                                                 | 120                              | 181            |
| Change from baseline to SOBDA last treatment week [2] | -0.27 (0.040)                    | -0.03 (0.033)  |
| Comparison with responders                            |                                  | 0.5            |
| Responsiveness statistic [3]                          |                                  |                |
| Comparison with responders [4]                        |                                  | 0.24           |
| Difference                                            |                                  | (0.14,0.34)    |
| 95% CI                                                |                                  | <0.001         |
| p-value                                               |                                  |                |

219

CONFIDENTIAL

ASQ112989

[1] Number of subjects with change from baseline SOBDA score.  
 [2] Least squares mean (standard error)  
 [3] Unadjusted difference between responders and non-responders, divided by the standard deviation of non-responders.  
 [4] Analysis of covariance adjusted for age, gender and SOBDA baseline score.  
 [5] A CGI-C responder is defined as a subject who had a response of "better" or "much better". A CGI-C non-responder is defined as a subject who had a response of "much worse", "worse" or "no change".  
 sam31676: /arenv/arprod/ccil8781\_gr33343/asq112989/final/drivers/sobda\_t025f.sas 12OCT2011 16:05

Protocol: ASQ112989

Page 1 of 1

Population: Modified intent-to-treat

Table 2.26

SOBDA Responsiveness: Summary of SOBDA Last Treatment Week Score by CRQ-SAS Dyspnoea Domain Response at Visit 3

|                                                         |                          | CRQ-SAS Dyspnoea Domain response at visit 3/PD [1] |                |
|---------------------------------------------------------|--------------------------|----------------------------------------------------|----------------|
|                                                         |                          | Responders                                         | Non-Responders |
| Number of subjects in category                          |                          | 143                                                | 215            |
| SOBDA last treatment week score                         | n                        | 127                                                | 192            |
|                                                         | Mean                     | 1.90                                               | 2.10           |
|                                                         | SD                       | 0.729                                              | 0.756          |
|                                                         | Median                   | 1.82                                               | 2.07           |
|                                                         | Min                      | 1.0                                                | 1.0            |
|                                                         | Max                      | 4.0                                                | 4.0            |
| Change from baseline to SOBDA last treatment week score | n                        | 117                                                | 184            |
|                                                         | Mean                     | -0.32                                              | 0.01           |
|                                                         | SD                       | 0.446                                              | 0.416          |
|                                                         | Median                   | -0.30                                              | 0.00           |
|                                                         | Min                      | -1.7                                               | -1.7           |
|                                                         | Max                      | 0.9                                                | 1.4            |
|                                                         | Mean percentage change   | -14.05                                             | 1.49           |
|                                                         | Standardised effect size | -0.46                                              | 0.01           |

[1] A CRQ-SAS dyspnoea domain responder is defined as a subject who had a change in score for the dyspnoea domain of the CRQ-SAS between Visit 2 and Visit 3/PD of 0.5 units or more. A CRQ-SAS dyspnoea domain non-responder is defined as a subject who had a change in score of less than 0.5 units.

N.B. CRQ-SAS dyspnoea domain score is calculated as the mean of responses to questions 1 to 5, and is calculated if at least one response was recorded.

N.B. The standardised effect size is defined as the difference between the mean baseline and mean post-treatment value divided by the standard deviation of the baseline scores.

sam31676: /arenv/arprod/ccil8781\_gr33343/asq112989/final/drivers/sobda\_t026f.sas 12OCT2011 16:05

CONFIDENTIAL

ASQ112989



Protocol: ASQ112989

Page 1 of 1

Population: Modified intent-to-treat

Table 2.27

SOBDA Responsiveness: Analysis of SOBDA Last Treatment Week Score by CRQ-SAS Dyspnoea Domain Response at Visit 3

|                                                       | CRQ-SAS Dyspnoea Responders     | Domain response at visit 3/PD [5] Non-Responders |
|-------------------------------------------------------|---------------------------------|--------------------------------------------------|
| n [1]                                                 | 117                             | 184                                              |
| Change from baseline to SOBDA last treatment week [2] | -0.31 (0.039)                   | -0.01 (0.031)                                    |
| Comparison with responders                            | Responsiveness statistic [3]    | 0.8                                              |
| Comparison with responders [4]                        | Difference<br>95% CI<br>p-value | 0.30<br>(0.21,0.40)<br><0.001                    |

[1] Number of subjects with change from baseline SOBDA score.

[2] Least squares mean (standard error)

[3] Unadjusted difference between responders and non-responders / standard deviation of non-responders.

[4] Analysis of covariance adjusted for age, gender and SOBDA baseline score.

[5] A CRQ-SAS dyspnoea domain responder is defined as a subject who had a change in score for the dyspnoea domain of the CRQ-SAS between Visit 2 and Visit 3/PD of 0.5 units or more. A CRQ-SAS dyspnoea domain non-responder is defined as a subject who had a change in score of less than 0.5 units.

N.B. CRQ-SAS dyspnoea domain score is calculated as the mean of responses to questions 1 to 5, and is calculated if at least one response was recorded.

sam31676: /arenv/arprod/ccil8781\_gr33343/asq112989/final/drivers/sobda\_t027f.sas 12OCT2011 16:05

221

CONFIDENTIAL

ASQ112989

Protocol: ASQ112989  
 Population: Modified intent-to-treat

Page 1 of 1

Table 2.28  
 SOBDA Responsiveness: Summary of SOBDA Last Treatment Week Score by Physician-Completed mMRC  
 Response at Visit 3

|                                                         |                          | Physician-completed mMRC response at visit 3/PD [1] |                |
|---------------------------------------------------------|--------------------------|-----------------------------------------------------|----------------|
|                                                         |                          | Responders                                          | Non-Responders |
| Number of subjects in category                          |                          | 104                                                 | 253            |
| SOBDA last treatment week score                         |                          | 97                                                  | 221            |
|                                                         | Mean                     | 1.89                                                | 2.08           |
|                                                         | SD                       | 0.754                                               | 0.744          |
|                                                         | Median                   | 1.82                                                | 2.02           |
|                                                         | Min                      | 1.0                                                 | 1.0            |
|                                                         | Max                      | 4.0                                                 | 4.0            |
| Change from baseline to SOBDA last treatment week score |                          | 91                                                  | 210            |
|                                                         | Mean                     | -0.13                                               | -0.11          |
|                                                         | SD                       | 0.416                                               | 0.472          |
|                                                         | Median                   | -0.12                                               | -0.04          |
|                                                         | Min                      | -1.5                                                | -1.7           |
|                                                         | Max                      | 1.4                                                 | 1.3            |
|                                                         | Mean percentage change   | -6.74                                               | -3.60          |
|                                                         | Standardised effect size | -0.20                                               | -0.16          |

[1] A physician-completed mMRC responder is defined as a subject who had a change in score between Visit 2 and Visit 3/PD of 1 unit or more. A physician-completed mMRC non-responder is defined as a subject who had a change of less than 1 unit.

N.B. The standardised effect size is defined as the difference between the mean baseline and mean post-treatment value divided by the standard deviation of the baseline scores.

sam31676: /arenv/arprod/ccil8781\_gr33343/asq112989/final/drivers/sobda\_t028f.sas 12OCT2011 16:05

CONFIDENTIAL

ASQ112989

Protocol: ASQ112989  
 Population: Modified intent-to-treat

Page 1 of 1

Table 2.29  
 SOBDA Responsiveness: Analysis of SOBDA Last Treatment Week Score by Physician-Completed mMRC Response at Visit 3

|                                                       |                              | Physician-completed mMRC response at visit 3/PD [5] |                |
|-------------------------------------------------------|------------------------------|-----------------------------------------------------|----------------|
|                                                       |                              | Responders                                          | Non-Responders |
| -----                                                 |                              |                                                     |                |
| n [1]                                                 |                              | 91                                                  | 210            |
| Change from baseline to SOBDA last treatment week [2] |                              | -0.15 (0.047)                                       | -0.12 (0.031)  |
| Comparison with responders                            | Responsiveness statistic [3] |                                                     | 0.0            |
| Comparison with responders [4]                        | Difference                   |                                                     | 0.03           |
|                                                       | 95% CI                       |                                                     | (-0.08,0.15)   |
|                                                       | p-value                      |                                                     | 0.535          |

223

[1] Number of subjects with change from baseline SOBDA score.

[2] Least squares mean (standard error)

[3] Unadjusted difference between responders and non-responders, divided by the standard deviation of non-responders.

[4] Analysis of covariance adjusted for age, gender and SOBDA baseline score.

[5] A physician-completed mMRC responder is defined as a subject who had a change in score between Visit 2 and Visit 3/PD of 1 unit or more. A physician-completed mMRC non-responder is defined as a subject who had a change of less than 1 unit.

sam31676: /arenv/arprod/ccil8781\_gr33343/asq112989/final/drivers/sobda\_t029f.sas 12OCT2011 16:05

CONFIDENTIAL

ASQ112989

Protocol: ASQ112989  
 Population: Modified intent-to-treat

Page 1 of 1

Table 2.30  
 SOBDA Responsiveness: Summary of SOBDA Last Treatment Week Score by Participant-Completed mMRC Response at Visit 3

|                                                         |                        | Participant-completed mMRC response at visit 3/PD [1] |                |
|---------------------------------------------------------|------------------------|-------------------------------------------------------|----------------|
|                                                         |                        | Responders                                            | Non-Responders |
| Number of subjects in category                          |                        | 108                                                   | 250            |
| SOBDA last treatment week score                         | n                      | 96                                                    | 223            |
|                                                         | Mean                   | 2.00                                                  | 2.03           |
|                                                         | SD                     | 0.804                                                 | 0.728          |
|                                                         | Median                 | 1.92                                                  | 2.00           |
|                                                         | Min                    | 1.0                                                   | 1.0            |
|                                                         | Max                    | 4.0                                                   | 4.0            |
| Change from baseline to SOBDA last treatment week score | n                      | 92                                                    | 209            |
|                                                         | Mean                   | -0.18                                                 | -0.09          |
|                                                         | SD                     | 0.508                                                 | 0.428          |
|                                                         | Median                 | -0.16                                                 | -0.03          |
|                                                         | Min                    | -1.6                                                  | -1.7           |
|                                                         | Max                    | 1.4                                                   | 1.1            |
|                                                         | Mean percentage change | -8.01                                                 | -3.03          |
| Standardised effect size                                | -0.26                  | -0.13                                                 |                |

[1] A participant-completed mMRC responder is defined as a subject who had a change in score between Visit 2 and Visit 3/PD of 1 unit or more. A participant-completed mMRC non-responder is defined as a subject who had a change of less than 1 unit.

N.B. The standardised effect size is defined as the difference between the mean baseline and mean post-treatment value divided by the standard deviation of the baseline scores.

sam31676: /arenv/arprod/ccil8781\_gr33343/asq112989/final/drivers/sobda\_t030f.sas 12OCT2011 16:05

CONFIDENTIAL

ASQ112989

Protocol: ASQ112989  
 Population: Modified intent-to-treat

Page 1 of 1

Table 2.31

SOBDA Responsiveness: Analysis of SOBDA Last Treatment Week Score by Participant-Completed mMRC Response at Visit 3

|                                                       | Participant-completed mMRC response at visit 3/PD [5] |                               |
|-------------------------------------------------------|-------------------------------------------------------|-------------------------------|
|                                                       | Responders                                            | Non-Responders                |
| n [1]                                                 | 92                                                    | 209                           |
| Change from baseline to SOBDA last treatment week [2] | -0.19 (0.046)                                         | -0.10 (0.031)                 |
| Comparison with responders                            | Responsiveness statistic [3]                          | 0.2                           |
| Comparison with responders [4]                        | Difference<br>95% CI<br>p-value                       | 0.08<br>(-0.02,0.19)<br>0.129 |

225

[1] Number of subjects with change from baseline SOBDA score.  
 [2] Least squares mean (standard error)  
 [3] Unadjusted difference between responders and non-responders, divided by the standard deviation of non-responders.  
 [4] Analysis of covariance adjusted for age, gender and SOBDA baseline score.  
 [5] A participant-completed mMRC responder is defined as a subject who had a change in score between Visit 2 and Visit 3/PD of 1 unit or more. A participant-completed mMRC non-responder is defined as a subject who had a change of less than 1 unit.  
 sam31676: /arenv/arprod/ccil8781\_gr33343/asq112989/final/drivers/sobda\_t031f.sas 12OCT2011 16:05

CONFIDENTIAL

ASQ112989

Protocol: ASQ112989

Page 1 of 1

Population: Modified Intent-to-treat

Table 2.32

SOBDA Threshold for Response: Summary of SOBDA Treatment Week 1 Score by PGAC Response Category at Study Day 8

|                                                       |        | -----PGAC at study day 8 [1]----- |       |       |       |       |
|-------------------------------------------------------|--------|-----------------------------------|-------|-------|-------|-------|
|                                                       |        | 1                                 | 2     | 3     | 4     | 5     |
| Number of subjects in category                        |        | 2                                 | 32    | 176   | 106   | 9     |
| SOBDA treatment week 1 score                          | n      | 2                                 | 29    | 169   | 101   | 8     |
|                                                       | Mean   | 2.51                              | 2.35  | 2.09  | 1.94  | 1.46  |
|                                                       | SD     | 0.285                             | 0.648 | 0.672 | 0.744 | 0.334 |
|                                                       | Median | 2.51                              | 2.37  | 2.10  | 1.86  | 1.52  |
|                                                       | Min    | 2.3                               | 1.3   | 1.0   | 1.0   | 1.0   |
| Change in SOBDA Summary Score from baseline to week 1 | Max    | 2.7                               | 3.6   | 3.8   | 4.0   | 2.0   |
|                                                       | n      | 2                                 | 28    | 158   | 97    | 8     |
|                                                       | Mean   | 0.60                              | 0.10  | -0.04 | -0.26 | -0.28 |
|                                                       | SD     | 0.398                             | 0.322 | 0.225 | 0.325 | 0.343 |
|                                                       | Median | 0.60                              | 0.05  | 0.01  | -0.21 | -0.07 |
| Min                                                   | 0.3    | -0.5                              | -1.1  | -1.3  | -0.8  |       |
| Max                                                   | 0.9    | 0.9                               | 0.4   | 0.5   | -0.0  |       |

[1] 1 = 'Much worse'; 2 = 'Worse'; 3 = 'No change'; 4 = 'Better'; 5 = 'Much better'

sam31676: /arenv/arprod/ccil8781\_gr33343/asq112989/final/drivers/sobda\_t032f.sas 12OCT2011 16:05

CONFIDENTIAL

ASQ112989

Protocol: ASQ112989  
 Population: Modified Intent-to-treat

Page 1 of 1

Table 2.33

SOBDA Threshold for Response: Summary of SOBDA Treatment Week 2 Score by PGAC Response Category at Study Day 15

|                                                     |        | -----PGAC at study day 15 [1]----- |       |       |       |       |
|-----------------------------------------------------|--------|------------------------------------|-------|-------|-------|-------|
|                                                     |        | 1                                  | 2     | 3     | 4     | 5     |
| Number of subjects in category                      |        | 4                                  | 39    | 179   | 89    | 9     |
| SOBDA treatment week 2 score                        | n      | 4                                  | 39    | 173   | 85    | 9     |
|                                                     | Mean   | 2.88                               | 2.33  | 2.07  | 1.81  | 1.53  |
|                                                     | SD     | 1.016                              | 0.684 | 0.748 | 0.646 | 0.585 |
|                                                     | Median | 3.17                               | 2.34  | 2.07  | 1.73  | 1.44  |
|                                                     | Min    | 1.5                                | 1.1   | 1.0   | 1.0   | 1.0   |
| Change in SOBDA Summary Score from week 1 to week 2 | Max    | 3.7                                | 3.9   | 4.0   | 3.8   | 2.9   |
|                                                     | n      | 4                                  | 39    | 169   | 82    | 9     |
|                                                     | Mean   | 0.31                               | 0.05  | -0.00 | -0.08 | -0.32 |
|                                                     | SD     | 0.375                              | 0.196 | 0.220 | 0.219 | 0.581 |
|                                                     | Median | 0.23                               | 0.04  | 0.00  | -0.04 | -0.15 |
| Min                                                 | -0.1   | -0.3                               | -1.1  | -0.8  | -1.8  |       |
| Max                                                 | 0.8    | 0.5                                | 1.0   | 0.6   | 0.2   |       |

[1] 1 = 'Much worse'; 2 = 'Worse'; 3 = 'No change'; 4 = 'Better'; 5 = 'Much better'  
 sam31676: /arenv/arprod/ccil8781\_gr33343/asq112989/final/drivers/sobda\_t033f.sas 12OCT2011 16:05

227

CONFIDENTIAL

ASQ112989

Protocol: ASQ112989  
Population: Modified Intent-to-treat

Table 2.34

SOBDA Threshold for Response: Summary of SOBDA Treatment Week 3 Score by PGAC Response Category at Study Day 22

|                                                     |        | -----PGAC at study day 22 [1]----- |       |       |       |       |
|-----------------------------------------------------|--------|------------------------------------|-------|-------|-------|-------|
|                                                     |        | 1                                  | 2     | 3     | 4     | 5     |
| Number of subjects in category                      |        | 6                                  | 45    | 176   | 77    | 13    |
| SOBDA treatment week 3 score                        | n      | 6                                  | 44    | 170   | 72    | 13    |
|                                                     | Mean   | 2.93                               | 2.49  | 2.04  | 1.77  | 1.47  |
|                                                     | SD     | 1.185                              | 0.672 | 0.700 | 0.674 | 0.551 |
|                                                     | Median | 3.29                               | 2.43  | 2.02  | 1.68  | 1.30  |
|                                                     | Min    | 1.2                                | 1.1   | 1.0   | 1.0   | 1.0   |
| Change in SOBDA Summary Score from week 2 to week 3 | Max    | 4.0                                | 3.7   | 3.7   | 4.0   | 2.8   |
|                                                     | n      | 6                                  | 43    | 167   | 70    | 13    |
|                                                     | Mean   | 0.17                               | 0.08  | -0.00 | -0.08 | -0.06 |
|                                                     | SD     | 0.253                              | 0.220 | 0.164 | 0.216 | 0.264 |
|                                                     | Median | 0.08                               | 0.07  | 0.00  | -0.06 | -0.04 |
| Min                                                 | -0.1   | -0.3                               | -0.8  | -0.8  | -0.5  |       |
| Max                                                 | 0.6    | 0.7                                | 0.4   | 0.6   | 0.6   |       |

[1] 1 = 'Much worse'; 2 = 'Worse'; 3 = 'No change'; 4 = 'Better'; 5 = 'Much better'  
sam31676: /arenv/arprod/ccil8781\_gr33343/asq112989/final/drivers/sobda\_t034f.sas 12OCT2011 16:10

CONFIDENTIAL

ASQ112989

1  
2  
3  
4  
5  
6  
7  
8  
9  
10  
11  
12  
13  
14  
15  
16  
17  
18  
19  
20  
21  
22  
23  
24  
25  
26  
27  
28  
29  
30  
31  
32  
33  
34  
35  
36  
37  
38  
39  
40  
41  
42  
43  
44  
45  
46  
47  
48  
49

228



Protocol: ASQ112989  
 Population: Modified Intent-to-treat

Page 1 of 1

Table 2.35

SOBDA Threshold for Response: Summary of SOBDA Treatment Week 4 Score by PGAC Response Category at Study Day 29

|                                                     |        | -----PGAC at study day 29 [1]----- |       |       |       |       |
|-----------------------------------------------------|--------|------------------------------------|-------|-------|-------|-------|
|                                                     |        | 1                                  | 2     | 3     | 4     | 5     |
| Number of subjects in category                      |        | 3                                  | 39    | 194   | 54    | 14    |
| SOBDA treatment week 4 score                        | n      | 3                                  | 37    | 186   | 50    | 13    |
|                                                     | Mean   | 3.91                               | 2.46  | 2.03  | 1.69  | 1.43  |
|                                                     | SD     | 0.123                              | 0.667 | 0.704 | 0.697 | 0.467 |
|                                                     | Median | 3.96                               | 2.44  | 1.96  | 1.40  | 1.35  |
|                                                     | Min    | 3.8                                | 1.2   | 1.0   | 1.0   | 1.0   |
| Change in SOBDA Summary Score from week 3 to week 4 | Max    | 4.0                                | 3.8   | 3.7   | 4.0   | 2.6   |
|                                                     | n      | 3                                  | 34    | 186   | 49    | 13    |
|                                                     | Mean   | 0.12                               | 0.10  | -0.01 | -0.10 | -0.04 |
|                                                     | SD     | 0.131                              | 0.289 | 0.167 | 0.216 | 0.097 |
|                                                     | Median | 0.07                               | 0.06  | 0.00  | -0.05 | -0.01 |
| Min                                                 | 0.0    | -0.3                               | -0.7  | -0.8  | -0.3  |       |
| Max                                                 | 0.3    | 1.3                                | 0.5   | 0.4   | 0.1   |       |

[1] 1 = 'Much worse'; 2 = 'Worse'; 3 = 'No change'; 4 = 'Better'; 5 = 'Much better'  
 sam31676: /arenv/arprod/ccil8781\_gr33343/asq112989/final/drivers/sobda\_t035f.sas 12OCT2011 16:05

229

CONFIDENTIAL

ASQ112989

Protocol: ASQ112989

Page 1 of 1

Population: Modified Intent-to-treat

Table 2.36

SOBDA Threshold for Response: Summary of SOBDA Treatment Week 5 Score by PGAC Response Category at Study Day 36

|                                                     |        | -----PGAC at study day 36 [1]----- |       |       |       |       |
|-----------------------------------------------------|--------|------------------------------------|-------|-------|-------|-------|
|                                                     |        | 1                                  | 2     | 3     | 4     | 5     |
| Number of subjects in category                      |        | 0                                  | 47    | 172   | 67    | 12    |
| SOBDA treatment week 5 score                        | n      | 0                                  | 45    | 158   | 66    | 11    |
|                                                     | Mean   |                                    | 2.51  | 2.06  | 1.72  | 1.28  |
|                                                     | SD     |                                    | 0.752 | 0.731 | 0.649 | 0.320 |
|                                                     | Median |                                    | 2.41  | 2.05  | 1.49  | 1.32  |
|                                                     | Min    |                                    | 1.2   | 1.0   | 1.0   | 1.0   |
|                                                     | Max    |                                    | 4.0   | 4.0   | 3.6   | 2.0   |
| Change in SOBDA Summary Score from week 4 to week 5 | n      | 0                                  | 45    | 155   | 66    | 11    |
|                                                     | Mean   |                                    | 0.06  | 0.03  | -0.08 | -0.05 |
|                                                     | SD     |                                    | 0.171 | 0.169 | 0.255 | 0.171 |
|                                                     | Median |                                    | 0.03  | 0.00  | -0.01 | -0.03 |
|                                                     | Min    |                                    | -0.4  | -0.6  | -1.5  | -0.4  |
|                                                     | Max    |                                    | 0.6   | 0.6   | 0.2   | 0.3   |

[1] 1 = 'Much worse'; 2 = 'Worse'; 3 = 'No change'; 4 = 'Better'; 5 = 'Much better'

sam31676: /arenv/arprod/ccil8781\_gr33343/asq112989/final/drivers/sobda\_t036f.sas 12OCT2011 16:05

CONFIDENTIAL

ASQ112989

Protocol: ASQ112989  
 Population: Modified Intent-to-treat

Page 1 of 1

Table 2.37

SOBDA Threshold for Response: Summary of SOBDA Treatment Week 6 Score by PGAC Response Category at Study Day 43

|                                                     |        | -----PGAC at study day 43 [1]----- |       |       |       |       |
|-----------------------------------------------------|--------|------------------------------------|-------|-------|-------|-------|
|                                                     |        | 1                                  | 2     | 3     | 4     | 5     |
| Number of subjects in category                      |        | 4                                  | 10    | 82    | 31    | 7     |
| SOBDA treatment week 6 score                        | n      | 4                                  | 10    | 75    | 29    | 5     |
|                                                     | Mean   | 3.61                               | 2.17  | 1.99  | 1.86  | 1.68  |
|                                                     | SD     | 0.289                              | 0.762 | 0.755 | 0.775 | 0.770 |
|                                                     | Median | 3.57                               | 2.17  | 1.84  | 1.79  | 1.38  |
|                                                     | Min    | 3.3                                | 1.0   | 1.0   | 1.0   | 1.0   |
| Change in SOBDA Summary Score from week 5 to week 6 | Max    | 4.0                                | 3.7   | 3.2   | 4.0   | 3.0   |
|                                                     | n      | 4                                  | 10    | 74    | 26    | 5     |
|                                                     | Mean   | 0.25                               | 0.09  | 0.00  | -0.05 | -0.02 |
|                                                     | SD     | 0.354                              | 0.224 | 0.231 | 0.181 | 0.054 |
|                                                     | Median | 0.21                               | 0.04  | -0.00 | -0.01 | -0.02 |
| Min                                                 | -0.1   | -0.1                               | -0.8  | -0.5  | -0.1  |       |
| Max                                                 | 0.7    | 0.7                                | 1.4   | 0.2   | 0.0   |       |

231

CONFIDENTIAL

ASQ112989

[1] 1 = 'Much worse'; 2 = 'Worse'; 3 = 'No change'; 4 = 'Better'; 5 = 'Much better'  
 sam31676: /arenv/arprod/ccil8781\_gr33343/asq112989/final/drivers/sobda\_t037f.sas 12OCT2011 16:05

Protocol: ASQ112989

Page 1 of 1

Population: Modified Intent-to-treat

Table 2.38

SOBDA Threshold for Response: Summary of SOBDA Last Treatment Week Score by CGI-C Response Category at Visit 3

|                                                         |        | CGI-C at visit 3/PD [1] |       |       |       |       |
|---------------------------------------------------------|--------|-------------------------|-------|-------|-------|-------|
|                                                         |        | 1                       | 2     | 3     | 4     | 5     |
| Number of subjects in category                          |        | 1                       | 32    | 185   | 128   | 12    |
| SOBDA last treatment week score                         | n      | 1                       | 28    | 163   | 116   | 11    |
|                                                         | Mean   | 3.08                    | 2.46  | 2.10  | 1.85  | 1.40  |
|                                                         | SD     |                         | 0.818 | 0.736 | 0.682 | 0.679 |
|                                                         | Median | 3.08                    | 2.19  | 2.06  | 1.81  | 1.03  |
|                                                         | Min    | 3.1                     | 1.2   | 1.0   | 1.0   | 1.0   |
|                                                         | Max    | 3.1                     | 4.0   | 4.0   | 3.9   | 2.8   |
| Change from baseline to SOBDA last treatment week score | n      | 1                       | 28    | 152   | 109   | 11    |
|                                                         | Mean   | 1.13                    | 0.26  | -0.09 | -0.25 | -0.32 |
|                                                         | SD     |                         | 0.354 | 0.391 | 0.484 | 0.504 |
|                                                         | Median | 1.13                    | 0.19  | -0.04 | -0.22 | -0.12 |
|                                                         | Min    | 1.1                     | -0.4  | -1.7  | -1.7  | -1.6  |
|                                                         | Max    | 1.1                     | 1.4   | 1.1   | 1.3   | 0.1   |

[1] 1 = 'Much worse'; 2 = 'Worse'; 3 = 'No change'; 4 = 'Better'; 5 = 'Much better'

sam31676: /arenv/arprod/ccil8781\_gr33343/asq112989/final/drivers/sobda\_t038f.sas 12OCT2011 16:05

CONFIDENTIAL

ASQ112989

Protocol: ASQ112989  
 Population: Modified Intent-to-treat

Page 1 of 1

Table 2.39

SOBDA Threshold for Response: Summary of SOBDA Last Treatment Week Score by CRQ-SAS Dyspnoea Domain  
 3-Point Response Category at Visit 3

|                                                         |        | CRQ-SAS Dyspnoea Domain Response Category at visit 3/PD [1] |       |       |
|---------------------------------------------------------|--------|-------------------------------------------------------------|-------|-------|
|                                                         |        | 1                                                           | 2     | 3     |
| Number of subjects in category                          |        | 147                                                         | 75    | 136   |
| SOBDA last treatment week score                         | n      | 130                                                         | 68    | 121   |
|                                                         | Mean   | 2.10                                                        | 2.08  | 1.90  |
|                                                         | SD     | 0.730                                                       | 0.805 | 0.731 |
|                                                         | Median | 2.09                                                        | 2.00  | 1.82  |
|                                                         | Min    | 1.0                                                         | 1.0   | 1.0   |
|                                                         | Max    | 4.0                                                         | 3.8   | 4.0   |
| Change from baseline to SOBDA last treatment week score | n      | 122                                                         | 68    | 111   |
|                                                         | Mean   | 0.07                                                        | -0.13 | -0.32 |
|                                                         | SD     | 0.401                                                       | 0.417 | 0.453 |
|                                                         | Median | 0.03                                                        | -0.08 | -0.28 |
|                                                         | Min    | -1.3                                                        | -1.7  | -1.7  |
|                                                         | Max    | 1.4                                                         | 0.9   | 0.9   |

233

[1] 1 = "No change or worse" (i.e. change of  $\leq 0$  units); 2 = "Better" (i.e. change of  $> 0-0.5$  units); 3 = "Much better" (i.e. change of  $> 0.5$  units).  
 N.B. CRQ-SAS dyspnoea domain score is calculated as the mean of responses to questions 1 to 5, and is calculated if at least one response was recorded.  
 sam31676: /arenv/arprod/ccil8781\_gr33343/asq112989/final/drivers/sobda\_t039f.sas 12OCT2011 16:05

CONFIDENTIAL

ASQ112989

Protocol: ASQ112989  
 Population: Modified Intent-to-treat

Page 1 of 1

Table 2.40

SOBDA Threshold for Response: Summary of SOBDA Last Treatment Week Score by FEV1 3-Point Response Category at Visit 3

|                                                         |        | FEV1 Response at visit 3/PD [1] |       |       |
|---------------------------------------------------------|--------|---------------------------------|-------|-------|
|                                                         |        | 1                               | 2     | 3     |
| Number of subjects in category                          |        | 163                             | 53    | 140   |
| SOBDA last treatment week score                         | n      | 147                             | 46    | 124   |
|                                                         | Mean   | 2.07                            | 2.00  | 1.96  |
|                                                         | SD     | 0.792                           | 0.675 | 0.733 |
|                                                         | Median | 2.01                            | 1.95  | 1.90  |
|                                                         | Min    | 1.0                             | 1.0   | 1.0   |
|                                                         | Max    | 4.0                             | 3.6   | 3.6   |
| Change from baseline to SOBDA last treatment week score | n      | 137                             | 42    | 120   |
|                                                         | Mean   | -0.04                           | -0.16 | -0.20 |
|                                                         | SD     | 0.459                           | 0.492 | 0.428 |
|                                                         | Median | 0.02                            | -0.17 | -0.13 |
|                                                         | Min    | -1.7                            | -1.7  | -1.6  |
|                                                         | Max    | 1.4                             | 1.3   | 1.1   |

[1] 1 = "No change or worse" (i.e. change of <50mL); 2 = "Better" (i.e. change of 50-<100mL); 3 = "Much better" (i.e. change of >=100mL).

sam31676: /arenv/arprod/ccil8781\_gr33343/asq112989/final/drivers/sobda\_t040f.sas 12OCT2011 16:05

CONFIDENTIAL

ASQ112989

Protocol: ASQ112989  
Population: Modified Intent-to-treat

Figure 3.01  
Cumulative Distribution Plot of Change from Baseline in SOBDA Last Treatment Week Score by Treatment  
Daily Mean Score: Rescored Response Categories



235

CONFIDENTIAL

ASQ112989

sam31676: /arenv/arprod/ci18781\_gr33343/asq112989/final/drivers/sobda\_f026b.sas 12OCT2011 15:08

Protocol: ASQ112989  
Population: Modified Intent-to-treat

Table 3.01  
Summary of Compliance with SOBDA Diary Completion

| Compliance (%) | Placebo<br>(N=75) | SAL 50mcg BID<br>(N=151) | FSC 250/50mcg<br>BID<br>(N=139) | Total<br>(N=365) |
|----------------|-------------------|--------------------------|---------------------------------|------------------|
| n              | 75                | 151                      | 139                             | 365              |
| Mean           | 88.3              | 88.9                     | 88.7                            | 88.7             |
| SD             | 12.36             | 13.66                    | 12.77                           | 13.03            |
| Median         | 91.2              | 94.0                     | 91.8                            | 92.9             |
| Min.           | 30                | 23                       | 0                               | 0                |
| Max.           | 98                | 98                       | 98                              | 98               |

236

CONFIDENTIAL

ASQ112989

sam31676: /arenv/arprod/ccil8781\_gr33343/asq112989/final/drivers/sobda\_t041.sas 12OCT2011 14:42



Protocol: ASQ112989  
Population: Run-in

Page 1 of 3

Table 3.02  
Summary of SOBDA Summary Scores

|                           |        | Run-in<br>failure<br>(N=52) | Placebo<br>(N=75) | SAL 50mcg<br>BID (N=152) | FSC<br>250/50mcg<br>BID (N=139) | Total<br>(N=418) |
|---------------------------|--------|-----------------------------|-------------------|--------------------------|---------------------------------|------------------|
| Baseline score            | n      | 25                          | 67                | 134                      | 130                             | 356              |
|                           | Mean   | 2.11                        | 2.07              | 2.22                     | 2.13                            | 2.15             |
|                           | SD     | 0.729                       | 0.605             | 0.767                    | 0.695                           | 0.709            |
|                           | Median | 2.14                        | 2.01              | 2.15                     | 2.16                            | 2.14             |
|                           | Min.   | 1.0                         | 1.0               | 1.0                      | 1.0                             | 1.0              |
|                           | Max.   | 3.1                         | 3.1               | 4.0                      | 3.8                             | 4.0              |
| Last treatment week score | n      |                             | 68                | 130                      | 123                             | 321              |
|                           | Mean   |                             | 1.98              | 2.14                     | 1.92                            | 2.02             |
|                           | SD     |                             | 0.659             | 0.781                    | 0.752                           | 0.750            |
|                           | Median |                             | 2.02              | 2.05                     | 1.84                            | 1.98             |
|                           | Min.   |                             | 1.0               | 1.0                      | 1.0                             | 1.0              |
|                           | Max.   |                             | 3.5               | 4.0                      | 3.8                             | 4.0              |
| Run-in week 1 score       | n      | 34                          | 67                | 138                      | 122                             | 361              |
|                           | Mean   | 1.86                        | 2.03              | 2.19                     | 2.07                            | 2.09             |
|                           | SD     | 0.675                       | 0.585             | 0.717                    | 0.718                           | 0.695            |
|                           | Median | 1.81                        | 1.94              | 2.13                     | 2.08                            | 2.05             |
|                           | Min.   | 1.0                         | 1.0               | 1.0                      | 1.0                             | 1.0              |
|                           | Max.   | 3.3                         | 3.2               | 3.8                      | 4.0                             | 4.0              |
| Run-in week 2 score       | n      | 21                          | 67                | 134                      | 131                             | 353              |
|                           | Mean   | 2.12                        | 2.08              | 2.21                     | 2.11                            | 2.14             |
|                           | SD     | 0.701                       | 0.603             | 0.763                    | 0.687                           | 0.702            |
|                           | Median | 2.20                        | 2.06              | 2.16                     | 2.18                            | 2.14             |
|                           | Min.   | 1.0                         | 1.0               | 1.0                      | 1.0                             | 1.0              |
|                           | Max.   | 3.1                         | 3.1               | 4.0                      | 3.8                             | 4.0              |

237

sam31676: /arenv/arprod/ccil8781\_gr33343/asq112989/final/drivers/sobda\_t042f.sas 12OCT2011 14:42

CONFIDENTIAL

ASQ112989

Protocol: ASQ112989  
Population: Run-in

Page 2 of 3

Table 3.02  
Summary of SOBDA Summary Scores

|                        |        | Run-in<br>failure<br>(N=52) | Placebo<br>(N=75) | SAL 50mcg<br>BID (N=152) | FSC<br>250/50mcg<br>BID (N=139) | Total<br>(N=418) |
|------------------------|--------|-----------------------------|-------------------|--------------------------|---------------------------------|------------------|
| Treatment week 1 score | n      | 67                          | 139               | 130                      | 336                             |                  |
|                        | Mean   | 2.05                        | 2.16              | 1.95                     | 2.06                            |                  |
|                        | SD     | 0.578                       | 0.756             | 0.697                    | 0.705                           |                  |
|                        | Median | 2.02                        | 2.11              | 1.85                     | 2.03                            |                  |
|                        | Min.   | 1.0                         | 1.0               | 1.0                      | 1.0                             |                  |
|                        | Max.   | 3.2                         | 4.0               | 3.8                      | 4.0                             |                  |
| Treatment week 2 score | n      | 70                          | 135               | 129                      | 334                             |                  |
|                        | Mean   | 2.02                        | 2.11              | 1.91                     | 2.01                            |                  |
|                        | SD     | 0.651                       | 0.765             | 0.720                    | 0.729                           |                  |
|                        | Median | 2.04                        | 2.07              | 1.76                     | 1.95                            |                  |
|                        | Min.   | 1.0                         | 1.0               | 1.0                      | 1.0                             |                  |
|                        | Max.   | 3.7                         | 4.0               | 3.7                      | 4.0                             |                  |
| Treatment week 3 score | n      | 68                          | 136               | 126                      | 330                             |                  |
|                        | Mean   | 2.02                        | 2.15              | 1.90                     | 2.03                            |                  |
|                        | SD     | 0.672                       | 0.772             | 0.718                    | 0.738                           |                  |
|                        | Median | 1.97                        | 2.08              | 1.83                     | 1.98                            |                  |
|                        | Min.   | 1.1                         | 1.0               | 1.0                      | 1.0                             |                  |
|                        | Max.   | 4.0                         | 4.0               | 3.7                      | 4.0                             |                  |
| Treatment week 4 score | n      | 67                          | 132               | 125                      | 324                             |                  |
|                        | Mean   | 2.01                        | 2.11              | 1.90                     | 2.01                            |                  |
|                        | SD     | 0.674                       | 0.772             | 0.742                    | 0.745                           |                  |
|                        | Median | 1.97                        | 1.99              | 1.78                     | 1.95                            |                  |
|                        | Min.   | 1.1                         | 1.0               | 1.0                      | 1.0                             |                  |
|                        | Max.   | 3.5                         | 4.0               | 3.7                      | 4.0                             |                  |

sam31676: /arenv/arprod/ccil8781\_gr33343/asq112989/final/drivers/sobda\_t042f.sas 12OCT2011 14:42

CONFIDENTIAL

ASQ112989

Protocol: ASQ112989  
 Population: Run-in

Page 3 of 3

Table 3.02  
 Summary of SOBDA Summary Scores

|                        | Run-in failure (N=52) | Placebo (N=75) | SAL 50mcg BID (N=152) | FSC 250/50mcg BID (N=139) | Total (N=418) |
|------------------------|-----------------------|----------------|-----------------------|---------------------------|---------------|
| Treatment week 5 score | n                     | 64             | 126                   | 119                       | 309           |
|                        | Mean                  | 1.97           | 2.16                  | 1.89                      | 2.01          |
|                        | SD                    | 0.633          | 0.789                 | 0.730                     | 0.744         |
|                        | Median                | 1.96           | 2.11                  | 1.76                      | 1.97          |
|                        | Min.                  | 1.0            | 1.0                   | 1.0                       | 1.0           |
|                        | Max.                  | 3.5            | 4.0                   | 3.8                       | 4.0           |
| Treatment week 6 score | n                     | 62             | 113                   | 107                       | 282           |
|                        | Mean                  | 1.95           | 2.15                  | 1.96                      | 2.03          |
|                        | SD                    | 0.667          | 0.789                 | 0.791                     | 0.768         |
|                        | Median                | 1.97           | 2.04                  | 1.82                      | 1.95          |
|                        | Min.                  | 1.0            | 1.0                   | 1.0                       | 1.0           |
|                        | Max.                  | 3.5            | 4.0                   | 3.7                       | 4.0           |

239

sam31676: /arenv/arprod/ccil8781\_gr33343/asq112989/final/drivers/sobda\_t042f.sas 12OCT2011 14:42

Protocol: ASQ112989  
 Population: Modified Intent-to-treat

Page 1 of 2

Table 3.03  
 Summary of Change from Baseline in SOBDA Summary Scores

|                           |        | Placebo<br>(N=75) | SAL 50mcg<br>BID (N=151) | FSC<br>250/50mcg<br>BID (N=139) | Total<br>(N=365) |
|---------------------------|--------|-------------------|--------------------------|---------------------------------|------------------|
| Last treatment week score | n      | 63                | 121                      | 119                             | 303              |
|                           | Mean   | -0.07             | -0.08                    | -0.18                           | -0.12            |
|                           | SD     | 0.476             | 0.392                    | 0.496                           | 0.455            |
|                           | Median | -0.03             | -0.08                    | -0.15                           | -0.08            |
|                           | Min.   | -1.7              | -1.3                     | -1.7                            | -1.7             |
|                           | Max.   | 1.1               | 1.4                      | 1.1                             | 1.4              |
| Treatment week 1 score    | n      | 63                | 128                      | 126                             | 317              |
|                           | Mean   | -0.01             | -0.07                    | -0.16                           | -0.10            |
|                           | SD     | 0.277             | 0.284                    | 0.347                           | 0.314            |
|                           | Median | -0.00             | -0.01                    | -0.10                           | -0.04            |
|                           | Min.   | -1.0              | -1.1                     | -1.5                            | -1.5             |
|                           | Max.   | 0.9               | 0.9                      | 0.6                             | 0.9              |
| Treatment week 2 score    | n      | 65                | 125                      | 124                             | 314              |
|                           | Mean   | -0.02             | -0.10                    | -0.19                           | -0.12            |
|                           | SD     | 0.377             | 0.376                    | 0.408                           | 0.393            |
|                           | Median | 0.01              | -0.06                    | -0.11                           | -0.06            |
|                           | Min.   | -1.2              | -2.0                     | -1.9                            | -2.0             |
|                           | Max.   | 1.2               | 1.2                      | 0.8                             | 1.2              |
| Treatment week 3 score    | n      | 63                | 126                      | 121                             | 310              |
|                           | Mean   | -0.03             | -0.09                    | -0.21                           | -0.12            |
|                           | SD     | 0.464             | 0.359                    | 0.450                           | 0.423            |
|                           | Median | 0.00              | -0.06                    | -0.14                           | -0.07            |
|                           | Min.   | -1.6              | -1.4                     | -1.7                            | -1.7             |
|                           | Max.   | 1.6               | 1.4                      | 0.9                             | 1.6              |

sam31676: /arenv/arprod/ccil8781\_gr33343/asq112989/final/drivers/sobda\_t043f.sas 12OCT2011 14:54

CONFIDENTIAL

ASQ112989

Protocol: ASQ112989  
 Population: Modified Intent-to-treat

Page 2 of 2

Table 3.03  
 Summary of Change from Baseline in SOBDA Summary Scores

|                        |        | Placebo<br>(N=75) | SAL 50mcg<br>BID (N=151) | FSC<br>250/50mcg<br>BID (N=139) | Total<br>(N=365) |
|------------------------|--------|-------------------|--------------------------|---------------------------------|------------------|
| Treatment week 4 score | n      | 62                | 123                      | 120                             | 305              |
|                        | Mean   | -0.04             | -0.10                    | -0.21                           | -0.13            |
|                        | SD     | 0.449             | 0.364                    | 0.478                           | 0.433            |
|                        | Median | 0.00              | -0.05                    | -0.12                           | -0.05            |
|                        | Min.   | -1.6              | -1.0                     | -1.7                            | -1.7             |
|                        | Max.   | 0.8               | 1.4                      | 0.9                             | 1.4              |
| Treatment week 5 score | n      | 59                | 115                      | 114                             | 288              |
|                        | Mean   | -0.04             | -0.09                    | -0.22                           | -0.13            |
|                        | SD     | 0.439             | 0.410                    | 0.497                           | 0.457            |
|                        | Median | 0.00              | -0.07                    | -0.14                           | -0.07            |
|                        | Min.   | -1.4              | -1.2                     | -1.7                            | -1.7             |
|                        | Max.   | 0.9               | 1.4                      | 0.9                             | 1.4              |
| Treatment week 6 score | n      | 58                | 104                      | 103                             | 265              |
|                        | Mean   | -0.10             | -0.07                    | -0.18                           | -0.12            |
|                        | SD     | 0.464             | 0.409                    | 0.520                           | 0.468            |
|                        | Median | -0.02             | -0.04                    | -0.12                           | -0.04            |
|                        | Min.   | -1.8              | -1.3                     | -1.6                            | -1.8             |
|                        | Max.   | 0.9               | 1.4                      | 1.3                             | 1.4              |

241

sam31676: /arenv/arprod/ccil8781\_gr33343/asq112989/final/drivers/sobda\_t043f.sas 12OCT2011 14:54

CONFIDENTIAL

ASQ112989

Protocol: ASQ112989  
Population: Modified Intent-to-treat

Page 1 of 2

Table 3.04  
Summary of SOBDA Summary Score Response

| Week                |         | Placebo<br>(N=75) | SAL 50mcg BID<br>(N=151) | FSC 250/50mcg<br>BID<br>(N=139) | Total<br>(N=365) |
|---------------------|---------|-------------------|--------------------------|---------------------------------|------------------|
| Last treatment week | n       | 63                | 121                      | 119                             | 303              |
|                     | <= -0.1 | 23 (37%)          | 57 (47%)                 | 64 (54%)                        | 144 (48%)        |
|                     | > -0.1  | 40 (63%)          | 64 (53%)                 | 55 (46%)                        | 159 (52%)        |
|                     | <= -0.2 | 18 (29%)          | 41 (34%)                 | 57 (48%)                        | 116 (38%)        |
|                     | > -0.2  | 45 (71%)          | 80 (66%)                 | 62 (52%)                        | 187 (62%)        |
| Treatment week 1    | n       | 63                | 128                      | 126                             | 317              |
|                     | <= -0.1 | 20 (32%)          | 43 (34%)                 | 60 (48%)                        | 123 (39%)        |
|                     | > -0.1  | 43 (68%)          | 85 (66%)                 | 66 (52%)                        | 194 (61%)        |
|                     | <= -0.2 | 10 (16%)          | 33 (26%)                 | 46 (37%)                        | 89 (28%)         |
|                     | > -0.2  | 53 (84%)          | 95 (74%)                 | 80 (63%)                        | 228 (72%)        |
| Treatment week 2    | n       | 65                | 125                      | 124                             | 314              |
|                     | <= -0.1 | 21 (32%)          | 55 (44%)                 | 63 (51%)                        | 139 (44%)        |
|                     | > -0.1  | 44 (68%)          | 70 (56%)                 | 61 (49%)                        | 175 (56%)        |
|                     | <= -0.2 | 15 (23%)          | 36 (29%)                 | 46 (37%)                        | 97 (31%)         |
|                     | > -0.2  | 50 (77%)          | 89 (71%)                 | 78 (63%)                        | 217 (69%)        |
| Treatment week 3    | n       | 63                | 126                      | 121                             | 310              |
|                     | <= -0.1 | 21 (33%)          | 55 (44%)                 | 67 (55%)                        | 143 (46%)        |
|                     | > -0.1  | 42 (67%)          | 71 (56%)                 | 54 (45%)                        | 167 (54%)        |
|                     | <= -0.2 | 18 (29%)          | 39 (31%)                 | 52 (43%)                        | 109 (35%)        |
|                     | > -0.2  | 45 (71%)          | 87 (69%)                 | 69 (57%)                        | 201 (65%)        |

242

sam31676: /arenv/arprod/ccil8781\_gr33343/asq112989/final/drivers/sobda\_t044.sas 12OCT2011 14:56

CONFIDENTIAL

ASQ112989

Protocol: ASQ112989  
 Population: Modified Intent-to-treat

Page 2 of 2

Table 3.04  
 Summary of SOBDA Summary Score Response

| Week             |         | Placebo<br>(N=75) | SAL 50mcg BID<br>(N=151) | FSC 250/50mcg<br>BID<br>(N=139) | Total<br>(N=365) |
|------------------|---------|-------------------|--------------------------|---------------------------------|------------------|
| Treatment week 4 | n       | 62                | 123                      | 120                             | 305              |
|                  | <= -0.1 | 22 (35%)          | 53 (43%)                 | 63 (53%)                        | 138 (45%)        |
|                  | > -0.1  | 40 (65%)          | 70 (57%)                 | 57 (48%)                        | 167 (55%)        |
|                  | <= -0.2 | 18 (29%)          | 44 (36%)                 | 54 (45%)                        | 116 (38%)        |
|                  | > -0.2  | 44 (71%)          | 79 (64%)                 | 66 (55%)                        | 189 (62%)        |
| Treatment week 5 | n       | 59                | 115                      | 114                             | 288              |
|                  | <= -0.1 | 19 (32%)          | 52 (45%)                 | 61 (54%)                        | 132 (46%)        |
|                  | > -0.1  | 40 (68%)          | 63 (55%)                 | 53 (46%)                        | 156 (54%)        |
|                  | <= -0.2 | 15 (25%)          | 42 (37%)                 | 50 (44%)                        | 107 (37%)        |
|                  | > -0.2  | 44 (75%)          | 73 (63%)                 | 64 (56%)                        | 181 (63%)        |
| Treatment week 6 | n       | 58                | 104                      | 103                             | 265              |
|                  | <= -0.1 | 18 (31%)          | 44 (42%)                 | 55 (53%)                        | 117 (44%)        |
|                  | > -0.1  | 40 (69%)          | 60 (58%)                 | 48 (47%)                        | 148 (56%)        |
|                  | <= -0.2 | 16 (28%)          | 34 (33%)                 | 45 (44%)                        | 95 (36%)         |
|                  | > -0.2  | 42 (72%)          | 70 (67%)                 | 58 (56%)                        | 170 (64%)        |

243

sam31676: /arenv/arprod/ccil8781\_gr33343/asq112989/final/drivers/sobda\_t044.sas 12OCT2011 14:56

CONFIDENTIAL

ASQ112989

Protocol: ASQ112989  
Population: Modified Intent-to-treat

Table 3.05  
Analysis of Change from Baseline in SOBDA Last Treatment Week Score

|                                                   |                          | Placebo<br>(N=75) | SAL 50mcg BID<br>(N=151) | FSC 250/50mcg<br>BID (N=139) |
|---------------------------------------------------|--------------------------|-------------------|--------------------------|------------------------------|
| Change from baseline to SOBDA last treatment week | LS mean                  | -0.10             | -0.07                    | -0.19                        |
|                                                   | SE                       | 0.057             | 0.041                    | 0.041                        |
| Comparison with placebo                           | Responsiveness statistic |                   | -0.02                    | -0.24                        |
| Comparison with placebo [1]                       | Difference               |                   | 0.03                     | -0.09                        |
|                                                   | 95% CI                   |                   | (-0.11,0.16)             | (-0.23,0.05)                 |
|                                                   | p-value                  |                   | 0.702                    | 0.189                        |

244

[1] Analysis of covariance adjusted for age, gender and SOBDA baseline score.  
 The responsiveness statistic is defined as the difference between treatment groups divided by the standard deviation of the placebo group.  
 sam31676: /arenv/arprod/ccil8781\_gr33343/asq112989/final/drivers/sobda\_t045f.sas 12OCT2011 14:52

CONFIDENTIAL

ASQ112989



Protocol: ASQ112989  
 Population: Run-in

Page 1 of 3

Table 3.06  
 Summary of Mean Number of Puffs of Rescue per Day

|                     |        | Run-in failure (N=52) | Placebo (N=75) | SAL 50mcg BID (N=152) | FSC 250/50mcg BID (N=139) | Total (N=418) |
|---------------------|--------|-----------------------|----------------|-----------------------|---------------------------|---------------|
| Baseline            | n      | 26                    | 72             | 142                   | 132                       | 372           |
|                     | Mean   | 6.0                   | 4.3            | 4.8                   | 5.2                       | 4.9           |
|                     | SD     | 4.32                  | 3.27           | 4.15                  | 4.61                      | 4.19          |
|                     | Median | 6.0                   | 4.3            | 4.0                   | 4.3                       | 4.3           |
|                     | Min.   | 0                     | 0              | 0                     | 0                         | 0             |
|                     | Max.   | 17                    | 11             | 22                    | 27                        | 27            |
| Last treatment week | n      |                       | 70             | 138                   | 127                       | 335           |
|                     | Mean   |                       | 3.8            | 3.8                   | 3.5                       | 3.7           |
|                     | SD     |                       | 3.29           | 4.08                  | 4.08                      | 3.92          |
|                     | Median |                       | 3.0            | 2.8                   | 2.2                       | 2.5           |
|                     | Min.   |                       | 0              | 0                     | 0                         | 0             |
|                     | Max.   |                       | 11             | 21                    | 23                        | 23            |
| Run-in week 1       | n      | 34                    | 70             | 145                   | 126                       | 375           |
|                     | Mean   | 5.0                   | 4.2            | 4.3                   | 4.9                       | 4.6           |
|                     | SD     | 4.04                  | 3.29           | 3.76                  | 4.68                      | 4.04          |
|                     | Median | 4.1                   | 3.8            | 3.7                   | 4.0                       | 3.9           |
|                     | Min.   | 0                     | 0              | 0                     | 0                         | 0             |
|                     | Max.   | 15                    | 14             | 19                    | 36                        | 36            |
| Run-in week 2       | n      | 22                    | 71             | 142                   | 133                       | 368           |
|                     | Mean   | 6.1                   | 4.3            | 4.8                   | 5.1                       | 4.9           |
|                     | SD     | 3.96                  | 3.21           | 4.16                  | 4.35                      | 4.06          |
|                     | Median | 6.0                   | 4.3            | 4.0                   | 4.3                       | 4.2           |
|                     | Min.   | 0                     | 0              | 0                     | 0                         | 0             |
|                     | Max.   | 17                    | 11             | 23                    | 20                        | 23            |

Note: 1 nebuLe has been considered equivalent to 2 puffs.  
 sam31676: /arenv/arprod/ccil8781\_gr33343/asq112989/final/drivers/resc\_t001.sas 29JUL2010 10:38

245

1  
2  
3  
4  
5  
6  
7  
8  
9  
10  
11  
12  
13  
14  
15  
16  
17  
18  
19  
20  
21  
22  
23  
24  
25  
26  
27  
28  
29  
30  
31  
32  
33  
34  
35  
36  
37  
38  
39  
40  
41  
42  
43  
44  
45  
46  
47  
48  
49

Protocol: ASQ112989  
Population: Run-in

Page 2 of 3

Table 3.06  
Summary of Mean Number of Puffs of Rescue per Day

|                  | Run-in<br>failure<br>(N=52) | Placebo<br>(N=75) | SAL 50mcg<br>BID (N=152) | FSC<br>250/50mcg<br>BID (N=139) | Total<br>(N=418) |
|------------------|-----------------------------|-------------------|--------------------------|---------------------------------|------------------|
| Treatment week 1 | n                           | 71                | 145                      | 135                             | 351              |
|                  | Mean                        | 4.4               | 4.3                      | 4.1                             | 4.3              |
|                  | SD                          | 3.84              | 4.20                     | 4.04                            | 4.06             |
|                  | Median                      | 4.0               | 3.7                      | 3.0                             | 3.5              |
|                  | Min.                        | 0                 | 0                        | 0                               | 0                |
|                  | Max.                        | 18                | 23                       | 19                              | 23               |
| Treatment week 2 | n                           | 72                | 141                      | 132                             | 345              |
|                  | Mean                        | 4.4               | 4.2                      | 3.6                             | 4.0              |
|                  | SD                          | 4.11              | 4.44                     | 3.54                            | 4.05             |
|                  | Median                      | 3.9               | 3.4                      | 2.6                             | 3.3              |
|                  | Min.                        | 0                 | 0                        | 0                               | 0                |
|                  | Max.                        | 20                | 24                       | 18                              | 24               |
| Treatment week 3 | n                           | 70                | 140                      | 130                             | 340              |
|                  | Mean                        | 4.2               | 4.1                      | 3.6                             | 3.9              |
|                  | SD                          | 3.83              | 4.03                     | 3.53                            | 3.81             |
|                  | Median                      | 3.4               | 3.7                      | 2.8                             | 3.2              |
|                  | Min.                        | 0                 | 0                        | 0                               | 0                |
|                  | Max.                        | 18                | 20                       | 15                              | 20               |
| Treatment week 4 | n                           | 69                | 139                      | 129                             | 337              |
|                  | Mean                        | 3.9               | 4.1                      | 3.8                             | 3.9              |
|                  | SD                          | 3.51              | 3.96                     | 3.81                            | 3.81             |
|                  | Median                      | 2.6               | 3.8                      | 2.7                             | 3.0              |
|                  | Min.                        | 0                 | 0                        | 0                               | 0                |
|                  | Max.                        | 13                | 20                       | 21                              | 21               |

Note: 1 nebuler has been considered equivalent to 2 puffs.

sam31676: /arenv/arprod/ccil8781\_gr33343/asq112989/final/drivers/resc\_t001.sas 29JUL2010 10:38

CONFIDENTIAL

ASQ112989

Protocol: ASQ112989  
 Population: Run-in

Page 3 of 3

Table 3.06  
 Summary of Mean Number of Puffs of Rescue per Day

|                  | Run-in failure (N=52) | Placebo (N=75) | SAL 50mcg BID (N=152) | FSC 250/50mcg BID (N=139) | Total (N=418) |
|------------------|-----------------------|----------------|-----------------------|---------------------------|---------------|
| Treatment week 5 | n                     | 67             | 133                   | 125                       | 325           |
|                  | Mean                  | 4.1            | 4.0                   | 3.7                       | 3.9           |
|                  | SD                    | 3.56           | 4.23                  | 3.66                      | 3.88          |
|                  | Median                | 3.0            | 3.7                   | 3.0                       | 3.1           |
|                  | Min.                  | 0              | 0                     | 0                         | 0             |
|                  | Max.                  | 12             | 21                    | 17                        | 21            |
| Treatment week 6 | n                     | 64             | 124                   | 111                       | 299           |
|                  | Mean                  | 4.0            | 3.9                   | 3.5                       | 3.8           |
|                  | SD                    | 3.28           | 4.25                  | 4.24                      | 4.05          |
|                  | Median                | 3.3            | 2.9                   | 2.0                       | 2.6           |
|                  | Min.                  | 0              | 0                     | 0                         | 0             |
|                  | Max.                  | 11             | 21                    | 24                        | 24            |

Note: 1 nebuler has been considered equivalent to 2 puffs.  
 sam31676: /arenv/arprod/ccil8781\_gr33343/asq112989/final/drivers/resc\_t001.sas 29JUL2010 10:38

247

Protocol: ASQ112989  
Population: Modified Intent-to-treat

Table 3.07  
Summary of Change from Baseline in Mean Number of Puffs of Rescue per Day

|                     |        | Placebo<br>(N=75) | SAL 50mcg<br>BID (N=151) | FSC<br>250/50mcg<br>BID (N=139) | Total<br>(N=365) |
|---------------------|--------|-------------------|--------------------------|---------------------------------|------------------|
| Last treatment week | n      | 68                | 131                      | 123                             | 322              |
|                     | Mean   | -0.4              | -0.8                     | -1.3                            | -0.9             |
|                     | SD     | 2.52              | 2.88                     | 3.26                            | 2.97             |
|                     | Median | 0.0               | -0.6                     | -0.6                            | -0.5             |
|                     | Min.   | -9                | -12                      | -15                             | -15              |
|                     | Max.   | 5                 | 9                        | 10                              | 10               |
| Treatment week 1    | n      | 69                | 137                      | 131                             | 337              |
|                     | Mean   | -0.0              | -0.5                     | -1.1                            | -0.6             |
|                     | SD     | 2.46              | 2.23                     | 2.64                            | 2.47             |
|                     | Median | 0.0               | -0.3                     | -0.3                            | -0.3             |
|                     | Min.   | -7                | -13                      | -11                             | -13              |
|                     | Max.   | 10                | 7                        | 7                               | 10               |
| Treatment week 2    | n      | 70                | 134                      | 127                             | 331              |
|                     | Mean   | 0.1               | -0.4                     | -1.4                            | -0.7             |
|                     | SD     | 3.04              | 3.28                     | 3.13                            | 3.22             |
|                     | Median | -0.1              | -0.3                     | -0.4                            | -0.3             |
|                     | Min.   | -9                | -13                      | -15                             | -15              |
|                     | Max.   | 12                | 22                       | 4                               | 22               |
| Treatment week 3    | n      | 67                | 132                      | 125                             | 324              |
|                     | Mean   | -0.1              | -0.6                     | -1.6                            | -0.9             |
|                     | SD     | 2.89              | 2.88                     | 3.42                            | 3.15             |
|                     | Median | -0.3              | -0.5                     | -0.4                            | -0.4             |
|                     | Min.   | -10               | -12                      | -20                             | -20              |
|                     | Max.   | 10                | 14                       | 4                               | 14               |

Note: 1 nebuLe has been considered equivalent to 2 puffs.  
sam31676: /arenv/arprod/ccil8781\_gr33343/asq112989/final/drivers/resc\_t002.sas 29JUL2010 10:38

CONFIDENTIAL

ASQ112989

1  
2  
3  
4  
5  
6  
7  
8  
9  
10  
11  
12  
13  
14  
15  
16  
17  
18  
19  
20  
21  
22  
23  
24  
25  
26  
27  
28  
29  
30  
31  
32  
33  
34  
35  
36  
37  
38  
39  
40  
41  
42  
43  
44  
45  
46  
47  
48  
49

248

Protocol: ASQ112989  
 Population: Modified Intent-to-treat

Page 2 of 2

Table 3.07  
 Summary of Change from Baseline in Mean Number of Puffs of Rescue per Day

|                  |        | Placebo<br>(N=75) | SAL 50mcg<br>BID (N=151) | FSC<br>250/50mcg<br>BID (N=139) | Total<br>(N=365) |
|------------------|--------|-------------------|--------------------------|---------------------------------|------------------|
| Treatment week 4 | n      | 67                | 132                      | 124                             | 323              |
|                  | Mean   | -0.3              | -0.7                     | -1.4                            | -0.9             |
|                  | SD     | 2.63              | 2.82                     | 3.37                            | 3.03             |
|                  | Median | 0.0               | -0.4                     | -0.4                            | -0.3             |
|                  | Min.   | -9                | -11                      | -16                             | -16              |
|                  | Max.   | 6                 | 13                       | 5                               | 13               |
| Treatment week 5 | n      | 65                | 124                      | 120                             | 309              |
|                  | Mean   | -0.3              | -0.6                     | -1.4                            | -0.8             |
|                  | SD     | 2.47              | 2.85                     | 3.11                            | 2.91             |
|                  | Median | 0.0               | -0.3                     | -0.4                            | -0.3             |
|                  | Min.   | -9                | -11                      | -15                             | -15              |
|                  | Max.   | 4                 | 11                       | 6                               | 11               |
| Treatment week 6 | n      | 62                | 116                      | 107                             | 285              |
|                  | Mean   | -0.3              | -0.8                     | -1.4                            | -0.9             |
|                  | SD     | 2.47              | 3.11                     | 3.39                            | 3.11             |
|                  | Median | 0.0               | -0.6                     | -0.7                            | -0.4             |
|                  | Min.   | -9                | -12                      | -16                             | -16              |
|                  | Max.   | 6                 | 9                        | 10                              | 10               |

Note: 1 nebuler has been considered equivalent to 2 puffs.  
 sam31676: /arenv/arprod/ccil8781\_gr33343/asq112989/final/drivers/resc\_t002.sas 29JUL2010 10:38

249

For peer review only

Protocol: ASQ112989  
Population: Run-in

Page 1 of 3

Table 3.08  
Summary of Percentage of Rescue-Free Days

| Visit               |        | Run-in<br>failure<br>(N=52) | Placebo<br>(N=75) | SAL 50mcg<br>BID (N=152) | FSC<br>250/50mcg<br>BID (N=139) | Total<br>(N=418) |
|---------------------|--------|-----------------------------|-------------------|--------------------------|---------------------------------|------------------|
| Baseline            | n      | 26                          | 72                | 142                      | 132                             | 372              |
|                     | Mean   | 10.4                        | 22.7              | 21.5                     | 22.1                            | 21.2             |
|                     | SD     | 25.34                       | 39.24             | 37.17                    | 39.30                           | 37.65            |
|                     | Median | 0.0                         | 0.0               | 0.0                      | 0.0                             | 0.0              |
|                     | Min.   | 0                           | 0                 | 0                        | 0                               | 0                |
|                     | Max.   | 100                         | 100               | 100                      | 100                             | 100              |
| Last treatment week | n      |                             | 70                | 138                      | 127                             | 335              |
|                     | Mean   |                             | 23.7              | 29.8                     | 35.2                            | 30.6             |
|                     | SD     |                             | 38.78             | 42.73                    | 44.32                           | 42.65            |
|                     | Median |                             | 0.0               | 0.0                      | 0.0                             | 0.0              |
|                     | Min.   |                             | 0                 | 0                        | 0                               | 0                |
|                     | Max.   |                             | 100               | 100                      | 100                             | 100              |
| Run-in week 1       | n      | 34                          | 70                | 145                      | 126                             | 375              |
|                     | Mean   | 21.9                        | 20.4              | 23.8                     | 23.4                            | 22.9             |
|                     | SD     | 31.56                       | 35.60             | 35.84                    | 36.53                           | 35.55            |
|                     | Median | 0.0                         | 0.0               | 0.0                      | 0.0                             | 0.0              |
|                     | Min.   | 0                           | 0                 | 0                        | 0                               | 0                |
|                     | Max.   | 100                         | 100               | 100                      | 100                             | 100              |
| Run-in week 2       | n      | 22                          | 71                | 142                      | 133                             | 368              |
|                     | Mean   | 8.4                         | 22.4              | 21.8                     | 22.9                            | 21.5             |
|                     | SD     | 21.89                       | 38.91             | 37.01                    | 39.42                           | 37.58            |
|                     | Median | 0.0                         | 0.0               | 0.0                      | 0.0                             | 0.0              |
|                     | Min.   | 0                           | 0                 | 0                        | 0                               | 0                |
|                     | Max.   | 100                         | 100               | 100                      | 100                             | 100              |

dln73797: /arenv/arprod/ccil8781\_gr33343/asq112989/final/drivers/resc\_t003.sas 27JUL2010 20:29

Protocol: ASQ112989  
Population: Run-in

Page 2 of 3

Table 3.08  
Summary of Percentage of Rescue-Free Days

| Visit            |        | Run-in failure (N=52) | Placebo (N=75) | SAL 50mcg BID (N=152) | FSC 250/50mcg BID (N=139) | Total (N=418) |
|------------------|--------|-----------------------|----------------|-----------------------|---------------------------|---------------|
| Treatment week 1 | n      | 71                    | 145            | 135                   | 351                       |               |
|                  | Mean   | 23.3                  | 24.1           | 29.9                  | 26.2                      |               |
|                  | SD     | 37.80                 | 38.26          | 41.85                 | 39.59                     |               |
|                  | Median | 0.0                   | 0.0            | 0.0                   | 0.0                       |               |
|                  | Min.   | 0                     | 0              | 0                     | 0                         |               |
|                  | Max.   | 100                   | 100            | 100                   | 100                       |               |
| Treatment week 2 | n      | 72                    | 141            | 132                   | 345                       |               |
|                  | Mean   | 23.9                  | 26.0           | 31.6                  | 27.7                      |               |
|                  | SD     | 39.11                 | 40.00          | 42.37                 | 40.75                     |               |
|                  | Median | 0.0                   | 0.0            | 0.0                   | 0.0                       |               |
|                  | Min.   | 0                     | 0              | 0                     | 0                         |               |
|                  | Max.   | 100                   | 100            | 100                   | 100                       |               |
| Treatment week 3 | n      | 70                    | 140            | 130                   | 340                       |               |
|                  | Mean   | 22.3                  | 26.6           | 32.4                  | 27.9                      |               |
|                  | SD     | 38.20                 | 41.44          | 43.08                 | 41.50                     |               |
|                  | Median | 0.0                   | 0.0            | 0.0                   | 0.0                       |               |
|                  | Min.   | 0                     | 0              | 0                     | 0                         |               |
|                  | Max.   | 100                   | 100            | 100                   | 100                       |               |
| Treatment week 4 | n      | 69                    | 139            | 129                   | 337                       |               |
|                  | Mean   | 24.3                  | 27.0           | 31.3                  | 28.1                      |               |
|                  | SD     | 39.33                 | 41.25          | 42.54                 | 41.34                     |               |
|                  | Median | 0.0                   | 0.0            | 0.0                   | 0.0                       |               |
|                  | Min.   | 0                     | 0              | 0                     | 0                         |               |
|                  | Max.   | 100                   | 100            | 100                   | 100                       |               |

251

dln73797: /arenv/arprod/ccil8781\_gr33343/asq112989/final/drivers/resc\_t003.sas 27JUL2010 20:29

CONFIDENTIAL

ASQ112989

Protocol: ASQ112989  
Population: Run-in

Page 3 of 3

Table 3.08  
Summary of Percentage of Rescue-Free Days

| Visit            |        | Run-in<br>failure<br>(N=52) | Placebo<br>(N=75) | SAL 50mcg<br>BID (N=152) | FSC<br>250/50mcg<br>BID (N=139) | Total<br>(N=418) |
|------------------|--------|-----------------------------|-------------------|--------------------------|---------------------------------|------------------|
| Treatment week 5 | n      | 67                          | 133               | 125                      | 325                             |                  |
|                  | Mean   | 23.8                        | 28.6              | 32.5                     | 29.1                            |                  |
|                  | SD     | 39.83                       | 41.57             | 43.36                    | 41.92                           |                  |
|                  | Median | 0.0                         | 0.0               | 0.0                      | 0.0                             |                  |
|                  | Min.   | 0                           | 0                 | 0                        | 0                               |                  |
|                  | Max.   | 100                         | 100               | 100                      | 100                             |                  |
| Treatment week 6 | n      | 64                          | 124               | 111                      | 299                             |                  |
|                  | Mean   | 22.4                        | 31.0              | 36.2                     | 31.1                            |                  |
|                  | SD     | 37.90                       | 43.83             | 45.07                    | 43.27                           |                  |
|                  | Median | 0.0                         | 0.0               | 0.0                      | 0.0                             |                  |
|                  | Min.   | 0                           | 0                 | 0                        | 0                               |                  |
|                  | Max.   | 100                         | 100               | 100                      | 100                             |                  |

252

dln73797: /arenv/arprod/ccil8781\_gr33343/asq112989/final/drivers/resc\_t003.sas 27JUL2010 20:29



Protocol: ASQ112989  
 Population: Modified Intent-to-treat

Page 1 of 2

Table 3.09  
 Summary of Change from Baseline in Percentage of Rescue-Free Days

| Visit               |        | Placebo<br>(N=75) | SAL 50mcg<br>BID (N=151) | FSC<br>250/50mcg<br>BID (N=139) | Total<br>(N=365) |
|---------------------|--------|-------------------|--------------------------|---------------------------------|------------------|
| Last treatment week | n      | 68                | 131                      | 123                             | 322              |
|                     | Mean   | 1.4               | 6.6                      | 10.7                            | 7.1              |
|                     | SD     | 33.80             | 32.54                    | 39.65                           | 35.74            |
|                     | Median | 0.0               | 0.0                      | 0.0                             | 0.0              |
|                     | Min.   | -100              | -100                     | -100                            | -100             |
|                     | Max.   | 100               | 100                      | 100                             | 100              |
| Treatment week 1    | n      | 69                | 137                      | 131                             | 337              |
|                     | Mean   | 1.7               | 2.2                      | 7.4                             | 4.1              |
|                     | SD     | 27.97             | 23.99                    | 30.46                           | 27.51            |
|                     | Median | 0.0               | 0.0                      | 0.0                             | 0.0              |
|                     | Min.   | -100              | -100                     | -100                            | -100             |
|                     | Max.   | 60                | 86                       | 100                             | 100              |
| Treatment week 2    | n      | 70                | 134                      | 127                             | 331              |
|                     | Mean   | 2.3               | 3.3                      | 8.0                             | 4.9              |
|                     | SD     | 34.37             | 28.03                    | 34.64                           | 32.06            |
|                     | Median | 0.0               | 0.0                      | 0.0                             | 0.0              |
|                     | Min.   | -100              | -100                     | -100                            | -100             |
|                     | Max.   | 100               | 100                      | 100                             | 100              |
| Treatment week 3    | n      | 67                | 132                      | 125                             | 324              |
|                     | Mean   | -0.2              | 3.8                      | 9.3                             | 5.1              |
|                     | SD     | 34.02             | 29.24                    | 35.95                           | 33.06            |
|                     | Median | 0.0               | 0.0                      | 0.0                             | 0.0              |
|                     | Min.   | -100              | -100                     | -100                            | -100             |
|                     | Max.   | 100               | 100                      | 100                             | 100              |

253

dln73797: /arenv/arprod/ccil8781\_gr33343/asq112989/final/drivers/resc\_t004.sas 27JUL2010 20:13

CONFIDENTIAL

ASQ112989

Protocol: ASQ112989  
 Population: Modified Intent-to-treat

Page 2 of 2

Table 3.09  
 Summary of Change from Baseline in Percentage of Rescue-Free Days

| Visit            |        | Placebo<br>(N=75) | SAL 50mcg<br>BID (N=151) | FSC<br>250/50mcg<br>BID (N=139) | Total<br>(N=365) |
|------------------|--------|-------------------|--------------------------|---------------------------------|------------------|
| Treatment week 4 | n      | 67                | 132                      | 124                             | 323              |
|                  | Mean   | 1.3               | 4.6                      | 8.7                             | 5.5              |
|                  | SD     | 35.01             | 31.83                    | 37.92                           | 34.94            |
|                  | Median | 0.0               | 0.0                      | 0.0                             | 0.0              |
|                  | Min.   | -100              | -100                     | -100                            | -100             |
|                  | Max.   | 100               | 100                      | 100                             | 100              |
| Treatment week 5 | n      | 65                | 124                      | 120                             | 309              |
|                  | Mean   | 0.4               | 4.6                      | 9.9                             | 5.8              |
|                  | SD     | 35.56             | 32.12                    | 39.63                           | 35.99            |
|                  | Median | 0.0               | 0.0                      | 0.0                             | 0.0              |
|                  | Min.   | -100              | -100                     | -100                            | -100             |
|                  | Max.   | 100               | 100                      | 100                             | 100              |
| Treatment week 6 | n      | 62                | 116                      | 107                             | 285              |
|                  | Mean   | -0.1              | 6.8                      | 11.7                            | 7.1              |
|                  | SD     | 35.05             | 34.72                    | 39.59                           | 36.83            |
|                  | Median | 0.0               | 0.0                      | 0.0                             | 0.0              |
|                  | Min.   | -100              | -100                     | -100                            | -100             |
|                  | Max.   | 100               | 100                      | 100                             | 100              |

254

dln73797: /arenv/arprod/ccil8781\_gr33343/asq112989/final/drivers/resc\_t004.sas 27JUL2010 20:13

CONFIDENTIAL

ASQ112989

Protocol: ASQ112989  
Population: Run-in

Page 1 of 14

Table 3.10  
Summary of Global Assessment of Shortness of Breath

| Day          | Response       | Run-in failure (N=52) | Placebo (N=75) | SAL 50mcg BID (N=152) | FSC 250/50mcg BID (N=139) | Total (N=418) |
|--------------|----------------|-----------------------|----------------|-----------------------|---------------------------|---------------|
| Run-in day 1 | n              | 37                    | 61             | 127                   | 119                       | 344           |
|              | 1 (Not at all) | 3 (8%)                | 2 (3%)         | 7 (6%)                | 1 (<1%)                   | 13 (4%)       |
|              | 2 (Slightly)   | 14 (38%)              | 31 (51%)       | 45 (35%)              | 62 (52%)                  | 152 (44%)     |
|              | 3 (Moderately) | 18 (49%)              | 25 (41%)       | 66 (52%)              | 49 (41%)                  | 158 (46%)     |
|              | 4 (Severely)   | 1 (3%)                | 3 (5%)         | 8 (6%)                | 4 (3%)                    | 16 (5%)       |
|              | 5 (Extremely)  | 1 (3%)                | 0              | 1 (<1%)               | 3 (3%)                    | 5 (1%)        |
| Run-in day 2 | n              | 36                    | 62             | 128                   | 112                       | 338           |
|              | 1 (Not at all) | 3 (8%)                | 1 (2%)         | 3 (2%)                | 1 (<1%)                   | 8 (2%)        |
|              | 2 (Slightly)   | 21 (58%)              | 23 (37%)       | 48 (38%)              | 51 (46%)                  | 143 (42%)     |
|              | 3 (Moderately) | 10 (28%)              | 36 (58%)       | 59 (46%)              | 47 (42%)                  | 152 (45%)     |
|              | 4 (Severely)   | 2 (6%)                | 2 (3%)         | 13 (10%)              | 11 (10%)                  | 28 (8%)       |
|              | 5 (Extremely)  | 0                     | 0              | 5 (4%)                | 2 (2%)                    | 7 (2%)        |
| Run-in day 3 | n              | 34                    | 61             | 140                   | 113                       | 348           |
|              | 1 (Not at all) | 3 (9%)                | 2 (3%)         | 7 (5%)                | 5 (4%)                    | 17 (5%)       |
|              | 2 (Slightly)   | 19 (56%)              | 25 (41%)       | 51 (36%)              | 50 (44%)                  | 145 (42%)     |
|              | 3 (Moderately) | 10 (29%)              | 31 (51%)       | 64 (46%)              | 43 (38%)                  | 148 (43%)     |
|              | 4 (Severely)   | 2 (6%)                | 2 (3%)         | 14 (10%)              | 13 (12%)                  | 31 (9%)       |
|              | 5 (Extremely)  | 0                     | 1 (2%)         | 4 (3%)                | 2 (2%)                    | 7 (2%)        |
| Run-in day 4 | n              | 32                    | 67             | 136                   | 116                       | 351           |
|              | 1 (Not at all) | 2 (6%)                | 1 (1%)         | 5 (4%)                | 5 (4%)                    | 13 (4%)       |
|              | 2 (Slightly)   | 16 (50%)              | 37 (55%)       | 53 (39%)              | 58 (50%)                  | 164 (47%)     |
|              | 3 (Moderately) | 9 (28%)               | 25 (37%)       | 61 (45%)              | 39 (34%)                  | 134 (38%)     |
|              | 4 (Severely)   | 4 (13%)               | 3 (4%)         | 16 (12%)              | 13 (11%)                  | 36 (10%)      |
|              | 5 (Extremely)  | 1 (3%)                | 1 (1%)         | 1 (<1%)               | 1 (<1%)                   | 4 (1%)        |

255

dln73797: /arenv/arprod/ccil8781\_gr33343/asq112989/final/drivers/glass\_t001.sas 27JUL2010 20:10

Protocol: ASQ112989  
Population: Run-in

Page 2 of 14

Table 3.10  
Summary of Global Assessment of Shortness of Breath

| Day          | Response       | Run-in failure<br>(N=52) | Placebo<br>(N=75) | SAL 50mcg<br>BID<br>(N=152) | FSC<br>250/50mcg<br>BID<br>(N=139) | Total<br>(N=418) |
|--------------|----------------|--------------------------|-------------------|-----------------------------|------------------------------------|------------------|
| Run-in day 5 | n              | 32                       | 66                | 135                         | 119                                | 352              |
|              | 1 (Not at all) | 3 (9%)                   | 1 (2%)            | 4 (3%)                      | 5 (4%)                             | 13 (4%)          |
|              | 2 (Slightly)   | 16 (50%)                 | 33 (50%)          | 49 (36%)                    | 49 (41%)                           | 147 (42%)        |
|              | 3 (Moderately) | 10 (31%)                 | 30 (45%)          | 67 (50%)                    | 47 (39%)                           | 154 (44%)        |
|              | 4 (Severely)   | 3 (9%)                   | 2 (3%)            | 13 (10%)                    | 15 (13%)                           | 33 (9%)          |
|              | 5 (Extremely)  | 0                        | 0                 | 2 (1%)                      | 3 (3%)                             | 5 (1%)           |
| Run-in day 6 | n              | 28                       | 65                | 140                         | 123                                | 356              |
|              | 1 (Not at all) | 1 (4%)                   | 3 (5%)            | 3 (2%)                      | 2 (2%)                             | 9 (3%)           |
|              | 2 (Slightly)   | 14 (50%)                 | 31 (48%)          | 62 (44%)                    | 63 (51%)                           | 170 (48%)        |
|              | 3 (Moderately) | 8 (29%)                  | 29 (45%)          | 56 (40%)                    | 47 (38%)                           | 140 (39%)        |
|              | 4 (Severely)   | 4 (14%)                  | 2 (3%)            | 16 (11%)                    | 10 (8%)                            | 32 (9%)          |
|              | 5 (Extremely)  | 1 (4%)                   | 0                 | 3 (2%)                      | 1 (<1%)                            | 5 (1%)           |
| Run-in day 7 | n              | 27                       | 67                | 143                         | 124                                | 361              |
|              | 1 (Not at all) | 1 (4%)                   | 3 (4%)            | 8 (6%)                      | 5 (4%)                             | 17 (5%)          |
|              | 2 (Slightly)   | 13 (48%)                 | 28 (42%)          | 49 (34%)                    | 53 (43%)                           | 143 (40%)        |
|              | 3 (Moderately) | 10 (37%)                 | 35 (52%)          | 68 (48%)                    | 52 (42%)                           | 165 (46%)        |
|              | 4 (Severely)   | 1 (4%)                   | 1 (1%)            | 17 (12%)                    | 11 (9%)                            | 30 (8%)          |
|              | 5 (Extremely)  | 2 (7%)                   | 0                 | 1 (<1%)                     | 3 (2%)                             | 6 (2%)           |
| Run-in day 8 | n              | 26                       | 68                | 139                         | 125                                | 358              |
|              | 1 (Not at all) | 2 (8%)                   | 5 (7%)            | 8 (6%)                      | 3 (2%)                             | 18 (5%)          |
|              | 2 (Slightly)   | 11 (42%)                 | 27 (40%)          | 44 (32%)                    | 56 (45%)                           | 138 (39%)        |
|              | 3 (Moderately) | 8 (31%)                  | 28 (41%)          | 71 (51%)                    | 54 (43%)                           | 161 (45%)        |
|              | 4 (Severely)   | 5 (19%)                  | 6 (9%)            | 14 (10%)                    | 10 (8%)                            | 35 (10%)         |
|              | 5 (Extremely)  | 0                        | 2 (3%)            | 2 (1%)                      | 2 (2%)                             | 6 (2%)           |

256

dln73797: /arenv/arprod/ccil8781\_gr33343/asq112989/final/drivers/glass\_t001.sas 27JUL2010 20:10

Protocol: ASQ112989  
Population: Run-in

Page 3 of 14

Table 3.10  
Summary of Global Assessment of Shortness of Breath

| Day           | Response       | Run-in failure (N=52) | Placebo (N=75) | SAL 50mcg BID (N=152) | FSC 250/50mcg BID (N=139) | Total (N=418) |
|---------------|----------------|-----------------------|----------------|-----------------------|---------------------------|---------------|
| Run-in day 9  | n              | 25                    | 65             | 136                   | 127                       | 353           |
|               | 1 (Not at all) | 0                     | 3 (5%)         | 7 (5%)                | 5 (4%)                    | 15 (4%)       |
|               | 2 (Slightly)   | 11 (44%)              | 31 (48%)       | 49 (36%)              | 55 (43%)                  | 146 (41%)     |
|               | 3 (Moderately) | 12 (48%)              | 29 (45%)       | 64 (47%)              | 51 (40%)                  | 156 (44%)     |
|               | 4 (Severely)   | 1 (4%)                | 2 (3%)         | 15 (11%)              | 15 (12%)                  | 33 (9%)       |
|               | 5 (Extremely)  | 1 (4%)                | 0              | 1 (<1%)               | 1 (<1%)                   | 3 (<1%)       |
| Run-in day 10 | n              | 22                    | 64             | 139                   | 125                       | 350           |
|               | 1 (Not at all) | 3 (14%)               | 2 (3%)         | 4 (3%)                | 4 (3%)                    | 13 (4%)       |
|               | 2 (Slightly)   | 4 (18%)               | 32 (50%)       | 54 (39%)              | 58 (46%)                  | 148 (42%)     |
|               | 3 (Moderately) | 13 (59%)              | 28 (44%)       | 68 (49%)              | 45 (36%)                  | 154 (44%)     |
|               | 4 (Severely)   | 2 (9%)                | 2 (3%)         | 12 (9%)               | 17 (14%)                  | 33 (9%)       |
|               | 5 (Extremely)  | 0                     | 0              | 1 (<1%)               | 1 (<1%)                   | 2 (<1%)       |
| Run-in day 11 | n              | 22                    | 67             | 138                   | 122                       | 349           |
|               | 1 (Not at all) | 1 (5%)                | 4 (6%)         | 4 (3%)                | 7 (6%)                    | 16 (5%)       |
|               | 2 (Slightly)   | 7 (32%)               | 30 (45%)       | 55 (40%)              | 51 (42%)                  | 143 (41%)     |
|               | 3 (Moderately) | 13 (59%)              | 28 (42%)       | 65 (47%)              | 52 (43%)                  | 158 (45%)     |
|               | 4 (Severely)   | 1 (5%)                | 5 (7%)         | 13 (9%)               | 10 (8%)                   | 29 (8%)       |
|               | 5 (Extremely)  | 0                     | 0              | 1 (<1%)               | 2 (2%)                    | 3 (<1%)       |
| Run-in day 12 | n              | 25                    | 71             | 133                   | 122                       | 351           |
|               | 1 (Not at all) | 0                     | 5 (7%)         | 4 (3%)                | 4 (3%)                    | 13 (4%)       |
|               | 2 (Slightly)   | 14 (56%)              | 29 (41%)       | 49 (37%)              | 58 (48%)                  | 150 (43%)     |
|               | 3 (Moderately) | 10 (40%)              | 35 (49%)       | 64 (48%)              | 48 (39%)                  | 157 (45%)     |
|               | 4 (Severely)   | 1 (4%)                | 2 (3%)         | 14 (11%)              | 11 (9%)                   | 28 (8%)       |
|               | 5 (Extremely)  | 0                     | 0              | 2 (2%)                | 1 (<1%)                   | 3 (<1%)       |

257

dln73797: /arenv/arprod/ccil8781\_gr33343/asq112989/final/drivers/glass\_t001.sas 27JUL2010 20:10

Protocol: ASQ112989  
Population: Run-in

Page 4 of 14

Table 3.10  
Summary of Global Assessment of Shortness of Breath

| Day           | Response       | Run-in failure<br>(N=52) | Placebo<br>(N=75) | SAL 50mcg<br>BID<br>(N=152) | FSC<br>250/50mcg<br>BID<br>(N=139) | Total<br>(N=418) |
|---------------|----------------|--------------------------|-------------------|-----------------------------|------------------------------------|------------------|
| Run-in day 13 | n              | 22                       | 62                | 128                         | 112                                | 324              |
|               | 1 (Not at all) | 0                        | 1 (2%)            | 6 (5%)                      | 3 (3%)                             | 10 (3%)          |
|               | 2 (Slightly)   | 10 (45%)                 | 36 (58%)          | 44 (34%)                    | 43 (38%)                           | 133 (41%)        |
|               | 3 (Moderately) | 10 (45%)                 | 21 (34%)          | 59 (46%)                    | 52 (46%)                           | 142 (44%)        |
|               | 4 (Severely)   | 2 (9%)                   | 4 (6%)            | 17 (13%)                    | 12 (11%)                           | 35 (11%)         |
|               | 5 (Extremely)  | 0                        | 0                 | 2 (2%)                      | 2 (2%)                             | 4 (1%)           |
| Run-in day 14 | n              | 17                       | 59                | 115                         | 108                                | 299              |
|               | 1 (Not at all) | 1 (6%)                   | 3 (5%)            | 3 (3%)                      | 2 (2%)                             | 9 (3%)           |
|               | 2 (Slightly)   | 5 (29%)                  | 26 (44%)          | 39 (34%)                    | 46 (43%)                           | 116 (39%)        |
|               | 3 (Moderately) | 8 (47%)                  | 27 (46%)          | 62 (54%)                    | 50 (46%)                           | 147 (49%)        |
|               | 4 (Severely)   | 2 (12%)                  | 3 (5%)            | 9 (8%)                      | 8 (7%)                             | 22 (7%)          |
|               | 5 (Extremely)  | 1 (6%)                   | 0                 | 2 (2%)                      | 2 (2%)                             | 5 (2%)           |
| Study day 1   | n              | 4                        | 70                | 143                         | 133                                | 350              |
|               | 1 (Not at all) | 1 (25%)                  | 3 (4%)            | 4 (3%)                      | 3 (2%)                             | 11 (3%)          |
|               | 2 (Slightly)   | 1 (25%)                  | 33 (47%)          | 62 (43%)                    | 60 (45%)                           | 156 (45%)        |
|               | 3 (Moderately) | 0                        | 32 (46%)          | 60 (42%)                    | 56 (42%)                           | 148 (42%)        |
|               | 4 (Severely)   | 2 (50%)                  | 2 (3%)            | 13 (9%)                     | 13 (10%)                           | 30 (9%)          |
|               | 5 (Extremely)  | 0                        | 0                 | 4 (3%)                      | 1 (<1%)                            | 5 (1%)           |
| Study day 2   | n              | 1                        | 71                | 136                         | 129                                | 337              |
|               | 1 (Not at all) | 0                        | 4 (6%)            | 6 (4%)                      | 8 (6%)                             | 18 (5%)          |
|               | 2 (Slightly)   | 0                        | 29 (41%)          | 57 (42%)                    | 65 (50%)                           | 151 (45%)        |
|               | 3 (Moderately) | 0                        | 37 (52%)          | 63 (46%)                    | 48 (37%)                           | 148 (44%)        |
|               | 4 (Severely)   | 1 (100%)                 | 1 (1%)            | 8 (6%)                      | 8 (6%)                             | 18 (5%)          |
|               | 5 (Extremely)  | 0                        | 0                 | 2 (1%)                      | 0                                  | 2 (<1%)          |

258

dln73797: /arenv/arprod/ccil8781\_gr33343/asq112989/final/drivers/glass\_t001.sas 27JUL2010 20:10

Protocol: ASQ112989  
Population: Run-in

Page 5 of 14

Table 3.10  
Summary of Global Assessment of Shortness of Breath

| Day         | Response       | Run-in failure (N=52) | Placebo (N=75) | SAL 50mcg BID (N=152) | FSC 250/50mcg BID (N=139) | Total (N=418) |
|-------------|----------------|-----------------------|----------------|-----------------------|---------------------------|---------------|
| Study day 3 | n              | 1                     | 68             | 134                   | 127                       | 330           |
|             | 1 (Not at all) | 0                     | 2 (3%)         | 6 (4%)                | 8 (6%)                    | 16 (5%)       |
|             | 2 (Slightly)   | 1 (100%)              | 28 (41%)       | 65 (49%)              | 70 (55%)                  | 164 (50%)     |
|             | 3 (Moderately) | 0                     | 36 (53%)       | 54 (40%)              | 43 (34%)                  | 133 (40%)     |
|             | 4 (Severely)   | 0                     | 2 (3%)         | 8 (6%)                | 6 (5%)                    | 16 (5%)       |
|             | 5 (Extremely)  | 0                     | 0              | 1 (<1%)               | 0                         | 1 (<1%)       |
| Study day 4 | n              | 1                     | 71             | 139                   | 132                       | 343           |
|             | 1 (Not at all) | 0                     | 2 (3%)         | 6 (4%)                | 9 (7%)                    | 17 (5%)       |
|             | 2 (Slightly)   | 1 (100%)              | 34 (48%)       | 57 (41%)              | 74 (56%)                  | 166 (48%)     |
|             | 3 (Moderately) | 0                     | 33 (46%)       | 61 (44%)              | 44 (33%)                  | 138 (40%)     |
|             | 4 (Severely)   | 0                     | 2 (3%)         | 13 (9%)               | 4 (3%)                    | 19 (6%)       |
|             | 5 (Extremely)  | 0                     | 0              | 2 (1%)                | 1 (<1%)                   | 3 (<1%)       |
| Study day 5 | n              | 0                     | 68             | 141                   | 131                       | 340           |
|             | 1 (Not at all) | 0                     | 3 (4%)         | 7 (5%)                | 9 (7%)                    | 19 (6%)       |
|             | 2 (Slightly)   | 0                     | 24 (35%)       | 54 (38%)              | 67 (51%)                  | 145 (43%)     |
|             | 3 (Moderately) | 0                     | 37 (54%)       | 68 (48%)              | 43 (33%)                  | 148 (44%)     |
|             | 4 (Severely)   | 0                     | 4 (6%)         | 11 (8%)               | 11 (8%)                   | 26 (8%)       |
|             | 5 (Extremely)  | 0                     | 0              | 1 (<1%)               | 1 (<1%)                   | 2 (<1%)       |
| Study day 6 | n              | 0                     | 68             | 138                   | 129                       | 335           |
|             | 1 (Not at all) | 0                     | 5 (7%)         | 5 (4%)                | 9 (7%)                    | 19 (6%)       |
|             | 2 (Slightly)   | 0                     | 24 (35%)       | 68 (49%)              | 70 (54%)                  | 162 (48%)     |
|             | 3 (Moderately) | 0                     | 37 (54%)       | 52 (38%)              | 42 (33%)                  | 131 (39%)     |
|             | 4 (Severely)   | 0                     | 2 (3%)         | 11 (8%)               | 8 (6%)                    | 21 (6%)       |
|             | 5 (Extremely)  | 0                     | 0              | 2 (1%)                | 0                         | 2 (<1%)       |

259

dln73797: /arenv/arprod/ccil8781\_gr33343/asq112989/final/drivers/glass\_t001.sas 27JUL2010 20:10

Protocol: ASQ112989  
Population: Run-in

Page 6 of 14

Table 3.10  
Summary of Global Assessment of Shortness of Breath

| Day          | Response       | Run-in failure<br>(N=52) | Placebo<br>(N=75) | SAL 50mcg<br>BID<br>(N=152) | FSC<br>250/50mcg<br>BID<br>(N=139) | Total<br>(N=418) |
|--------------|----------------|--------------------------|-------------------|-----------------------------|------------------------------------|------------------|
| Study day 7  | n              | 0                        | 67                | 141                         | 124                                | 332              |
|              | 1 (Not at all) | 0                        | 4 (6%)            | 4 (3%)                      | 7 (6%)                             | 15 (5%)          |
|              | 2 (Slightly)   | 0                        | 28 (42%)          | 65 (46%)                    | 64 (52%)                           | 157 (47%)        |
|              | 3 (Moderately) | 0                        | 33 (49%)          | 60 (43%)                    | 41 (33%)                           | 134 (40%)        |
|              | 4 (Severely)   | 0                        | 2 (3%)            | 11 (8%)                     | 12 (10%)                           | 25 (8%)          |
|              | 5 (Extremely)  | 0                        | 0                 | 1 (<1%)                     | 0                                  | 1 (<1%)          |
| Study day 8  | n              | 0                        | 71                | 139                         | 127                                | 337              |
|              | 1 (Not at all) | 0                        | 4 (6%)            | 5 (4%)                      | 12 (9%)                            | 21 (6%)          |
|              | 2 (Slightly)   | 0                        | 29 (41%)          | 64 (46%)                    | 69 (54%)                           | 162 (48%)        |
|              | 3 (Moderately) | 0                        | 35 (49%)          | 60 (43%)                    | 39 (31%)                           | 134 (40%)        |
|              | 4 (Severely)   | 0                        | 3 (4%)            | 10 (7%)                     | 7 (6%)                             | 20 (6%)          |
|              | 5 (Extremely)  | 0                        | 0                 | 0                           | 0                                  | 0                |
| Study day 9  | n              | 0                        | 67                | 135                         | 132                                | 334              |
|              | 1 (Not at all) | 0                        | 4 (6%)            | 7 (5%)                      | 12 (9%)                            | 23 (7%)          |
|              | 2 (Slightly)   | 0                        | 30 (45%)          | 60 (44%)                    | 69 (52%)                           | 159 (48%)        |
|              | 3 (Moderately) | 0                        | 29 (43%)          | 56 (41%)                    | 42 (32%)                           | 127 (38%)        |
|              | 4 (Severely)   | 0                        | 4 (6%)            | 11 (8%)                     | 8 (6%)                             | 23 (7%)          |
|              | 5 (Extremely)  | 0                        | 0                 | 1 (<1%)                     | 1 (<1%)                            | 2 (<1%)          |
| Study day 10 | n              | 0                        | 69                | 138                         | 130                                | 337              |
|              | 1 (Not at all) | 0                        | 3 (4%)            | 10 (7%)                     | 14 (11%)                           | 27 (8%)          |
|              | 2 (Slightly)   | 0                        | 30 (43%)          | 58 (42%)                    | 69 (53%)                           | 157 (47%)        |
|              | 3 (Moderately) | 0                        | 35 (51%)          | 57 (41%)                    | 42 (32%)                           | 134 (40%)        |
|              | 4 (Severely)   | 0                        | 1 (1%)            | 12 (9%)                     | 4 (3%)                             | 17 (5%)          |
|              | 5 (Extremely)  | 0                        | 0                 | 1 (<1%)                     | 1 (<1%)                            | 2 (<1%)          |

dln73797: /arenv/arprod/ccil8781\_gr33343/asq112989/final/drivers/glass\_t001.sas 27JUL2010 20:10



Protocol: ASQ112989  
Population: Run-in

Page 7 of 14

Table 3.10  
Summary of Global Assessment of Shortness of Breath

| Day          | Response       | Run-in failure (N=52) | Placebo (N=75) | SAL 50mcg BID (N=152) | FSC 250/50mcg BID (N=139) | Total (N=418) |
|--------------|----------------|-----------------------|----------------|-----------------------|---------------------------|---------------|
| Study day 11 | n              | 0                     | 69             | 136                   | 126                       | 331           |
|              | 1 (Not at all) | 0                     | 4 (6%)         | 7 (5%)                | 12 (10%)                  | 23 (7%)       |
|              | 2 (Slightly)   | 0                     | 33 (48%)       | 68 (50%)              | 71 (56%)                  | 172 (52%)     |
|              | 3 (Moderately) | 0                     | 32 (46%)       | 48 (35%)              | 35 (28%)                  | 115 (35%)     |
|              | 4 (Severely)   | 0                     | 0              | 11 (8%)               | 7 (6%)                    | 18 (5%)       |
|              | 5 (Extremely)  | 0                     | 0              | 2 (1%)                | 1 (<1%)                   | 3 (<1%)       |
| Study day 12 | n              | 0                     | 67             | 138                   | 123                       | 328           |
|              | 1 (Not at all) | 0                     | 5 (7%)         | 8 (6%)                | 10 (8%)                   | 23 (7%)       |
|              | 2 (Slightly)   | 0                     | 26 (39%)       | 70 (51%)              | 64 (52%)                  | 160 (49%)     |
|              | 3 (Moderately) | 0                     | 35 (52%)       | 47 (34%)              | 38 (31%)                  | 120 (37%)     |
|              | 4 (Severely)   | 0                     | 1 (1%)         | 10 (7%)               | 10 (8%)                   | 21 (6%)       |
|              | 5 (Extremely)  | 0                     | 0              | 3 (2%)                | 1 (<1%)                   | 4 (1%)        |
| Study day 13 | n              | 0                     | 69             | 139                   | 129                       | 337           |
|              | 1 (Not at all) | 0                     | 3 (4%)         | 7 (5%)                | 12 (9%)                   | 22 (7%)       |
|              | 2 (Slightly)   | 0                     | 37 (54%)       | 69 (50%)              | 63 (49%)                  | 169 (50%)     |
|              | 3 (Moderately) | 0                     | 26 (38%)       | 46 (33%)              | 45 (35%)                  | 117 (35%)     |
|              | 4 (Severely)   | 0                     | 2 (3%)         | 15 (11%)              | 9 (7%)                    | 26 (8%)       |
|              | 5 (Extremely)  | 0                     | 1 (1%)         | 2 (1%)                | 0                         | 3 (<1%)       |
| Study day 14 | n              | 0                     | 67             | 137                   | 126                       | 330           |
|              | 1 (Not at all) | 0                     | 6 (9%)         | 11 (8%)               | 11 (9%)                   | 28 (8%)       |
|              | 2 (Slightly)   | 0                     | 32 (48%)       | 69 (50%)              | 74 (59%)                  | 175 (53%)     |
|              | 3 (Moderately) | 0                     | 27 (40%)       | 42 (31%)              | 35 (28%)                  | 104 (32%)     |
|              | 4 (Severely)   | 0                     | 2 (3%)         | 15 (11%)              | 5 (4%)                    | 22 (7%)       |
|              | 5 (Extremely)  | 0                     | 0              | 0                     | 1 (<1%)                   | 1 (<1%)       |

261

dln73797: /arenv/arprod/ccil8781\_gr33343/asq112989/final/drivers/glass\_t001.sas 27JUL2010 20:10

Protocol: ASQ112989  
Population: Run-in

Page 8 of 14

Table 3.10  
Summary of Global Assessment of Shortness of Breath

| Day          | Response       | Run-in failure<br>(N=52) | Placebo<br>(N=75) | SAL 50mcg<br>BID<br>(N=152) | FSC<br>250/50mcg<br>BID<br>(N=139) | Total<br>(N=418) |
|--------------|----------------|--------------------------|-------------------|-----------------------------|------------------------------------|------------------|
| Study day 15 | n              | 0                        | 69                | 136                         | 125                                | 330              |
|              | 1 (Not at all) | 0                        | 5 (7%)            | 9 (7%)                      | 11 (9%)                            | 25 (8%)          |
|              | 2 (Slightly)   | 0                        | 35 (51%)          | 61 (45%)                    | 60 (48%)                           | 156 (47%)        |
|              | 3 (Moderately) | 0                        | 28 (41%)          | 51 (38%)                    | 49 (39%)                           | 128 (39%)        |
|              | 4 (Severely)   | 0                        | 0                 | 15 (11%)                    | 5 (4%)                             | 20 (6%)          |
|              | 5 (Extremely)  | 0                        | 1 (1%)            | 0                           | 0                                  | 1 (<1%)          |
| Study day 16 | n              | 0                        | 66                | 138                         | 124                                | 328              |
|              | 1 (Not at all) | 0                        | 7 (11%)           | 9 (7%)                      | 14 (11%)                           | 30 (9%)          |
|              | 2 (Slightly)   | 0                        | 35 (53%)          | 60 (43%)                    | 65 (52%)                           | 160 (49%)        |
|              | 3 (Moderately) | 0                        | 23 (35%)          | 60 (43%)                    | 38 (31%)                           | 121 (37%)        |
|              | 4 (Severely)   | 0                        | 1 (2%)            | 9 (7%)                      | 6 (5%)                             | 16 (5%)          |
|              | 5 (Extremely)  | 0                        | 0                 | 0                           | 1 (<1%)                            | 1 (<1%)          |
| Study day 17 | n              | 0                        | 66                | 133                         | 122                                | 321              |
|              | 1 (Not at all) | 0                        | 3 (5%)            | 9 (7%)                      | 9 (7%)                             | 21 (7%)          |
|              | 2 (Slightly)   | 0                        | 32 (48%)          | 57 (43%)                    | 68 (56%)                           | 157 (49%)        |
|              | 3 (Moderately) | 0                        | 28 (42%)          | 57 (43%)                    | 36 (30%)                           | 121 (38%)        |
|              | 4 (Severely)   | 0                        | 2 (3%)            | 8 (6%)                      | 9 (7%)                             | 19 (6%)          |
|              | 5 (Extremely)  | 0                        | 1 (2%)            | 2 (2%)                      | 0                                  | 3 (<1%)          |
| Study day 18 | n              | 0                        | 66                | 136                         | 126                                | 328              |
|              | 1 (Not at all) | 0                        | 7 (11%)           | 8 (6%)                      | 12 (10%)                           | 27 (8%)          |
|              | 2 (Slightly)   | 0                        | 29 (44%)          | 59 (43%)                    | 59 (47%)                           | 147 (45%)        |
|              | 3 (Moderately) | 0                        | 27 (41%)          | 60 (44%)                    | 49 (39%)                           | 136 (41%)        |
|              | 4 (Severely)   | 0                        | 3 (5%)            | 8 (6%)                      | 6 (5%)                             | 17 (5%)          |
|              | 5 (Extremely)  | 0                        | 0                 | 1 (<1%)                     | 0                                  | 1 (<1%)          |

262

dln73797: /arenv/arprod/ccil8781\_gr33343/asq112989/final/drivers/glass\_t001.sas 27JUL2010 20:10

Protocol: ASQ112989  
Population: Run-in

Page 9 of 14

Table 3.10  
Summary of Global Assessment of Shortness of Breath

| Day           | Response       | Run-in failure (N=52) | Placebo (N=75) | SAL 50mcg BID (N=152) | FSC 250/50mcg BID (N=139) | Total (N=418) |
|---------------|----------------|-----------------------|----------------|-----------------------|---------------------------|---------------|
| Study day 19  | n              | 0                     | 67             | 135                   | 124                       | 326           |
|               | 1 (Not at all) | 0                     | 7 (10%)        | 6 (4%)                | 14 (11%)                  | 27 (8%)       |
|               | 2 (Slightly)   | 0                     | 30 (45%)       | 60 (44%)              | 66 (53%)                  | 156 (48%)     |
|               | 3 (Moderately) | 0                     | 27 (40%)       | 59 (44%)              | 36 (29%)                  | 122 (37%)     |
|               | 4 (Severely)   | 0                     | 3 (4%)         | 8 (6%)                | 7 (6%)                    | 18 (6%)       |
| 5 (Extremely) | 0              | 0                     | 2 (1%)         | 1 (<1%)               | 3 (<1%)                   |               |
| Study day 20  | n              | 0                     | 68             | 136                   | 121                       | 325           |
|               | 1 (Not at all) | 0                     | 7 (10%)        | 10 (7%)               | 14 (12%)                  | 31 (10%)      |
|               | 2 (Slightly)   | 0                     | 26 (38%)       | 57 (42%)              | 61 (50%)                  | 144 (44%)     |
|               | 3 (Moderately) | 0                     | 33 (49%)       | 58 (43%)              | 38 (31%)                  | 129 (40%)     |
|               | 4 (Severely)   | 0                     | 1 (1%)         | 10 (7%)               | 8 (7%)                    | 19 (6%)       |
| 5 (Extremely) | 0              | 1 (1%)                | 1 (<1%)        | 0                     | 2 (<1%)                   |               |
| Study day 21  | n              | 0                     | 67             | 133                   | 126                       | 326           |
|               | 1 (Not at all) | 0                     | 6 (9%)         | 6 (5%)                | 12 (10%)                  | 24 (7%)       |
|               | 2 (Slightly)   | 0                     | 29 (43%)       | 60 (45%)              | 69 (55%)                  | 158 (48%)     |
|               | 3 (Moderately) | 0                     | 29 (43%)       | 53 (40%)              | 39 (31%)                  | 121 (37%)     |
|               | 4 (Severely)   | 0                     | 3 (4%)         | 13 (10%)              | 6 (5%)                    | 22 (7%)       |
| 5 (Extremely) | 0              | 0                     | 1 (<1%)        | 0                     | 1 (<1%)                   |               |
| Study day 22  | n              | 0                     | 68             | 134                   | 127                       | 329           |
|               | 1 (Not at all) | 0                     | 6 (9%)         | 6 (4%)                | 11 (9%)                   | 23 (7%)       |
|               | 2 (Slightly)   | 0                     | 31 (46%)       | 60 (45%)              | 66 (52%)                  | 157 (48%)     |
|               | 3 (Moderately) | 0                     | 28 (41%)       | 53 (40%)              | 42 (33%)                  | 123 (37%)     |
|               | 4 (Severely)   | 0                     | 3 (4%)         | 14 (10%)              | 8 (6%)                    | 25 (8%)       |
| 5 (Extremely) | 0              | 0                     | 1 (<1%)        | 0                     | 1 (<1%)                   |               |

263

CONFIDENTIAL

ASQ112989

dln73797: /arenv/arprod/ccil8781\_gr33343/asq112989/final/drivers/glass\_t001.sas 27JUL2010 20:10

Protocol: ASQ112989  
Population: Run-in

Page 10 of 14

Table 3.10  
Summary of Global Assessment of Shortness of Breath

| Day          | Response       | Run-in failure<br>(N=52) | Placebo<br>(N=75) | SAL 50mcg<br>BID<br>(N=152) | FSC<br>250/50mcg<br>BID<br>(N=139) | Total<br>(N=418) |
|--------------|----------------|--------------------------|-------------------|-----------------------------|------------------------------------|------------------|
| Study day 23 | n              | 0                        | 70                | 132                         | 123                                | 325              |
|              | 1 (Not at all) | 0                        | 7 (10%)           | 9 (7%)                      | 15 (12%)                           | 31 (10%)         |
|              | 2 (Slightly)   | 0                        | 29 (41%)          | 57 (43%)                    | 59 (48%)                           | 145 (45%)        |
|              | 3 (Moderately) | 0                        | 31 (44%)          | 53 (40%)                    | 40 (33%)                           | 124 (38%)        |
|              | 4 (Severely)   | 0                        | 3 (4%)            | 12 (9%)                     | 9 (7%)                             | 24 (7%)          |
|              | 5 (Extremely)  | 0                        | 0                 | 1 (<1%)                     | 0                                  | 1 (<1%)          |
| Study day 24 | n              | 0                        | 66                | 131                         | 124                                | 321              |
|              | 1 (Not at all) | 0                        | 6 (9%)            | 7 (5%)                      | 12 (10%)                           | 25 (8%)          |
|              | 2 (Slightly)   | 0                        | 27 (41%)          | 64 (49%)                    | 64 (52%)                           | 155 (48%)        |
|              | 3 (Moderately) | 0                        | 29 (44%)          | 46 (35%)                    | 37 (30%)                           | 112 (35%)        |
|              | 4 (Severely)   | 0                        | 2 (3%)            | 12 (9%)                     | 9 (7%)                             | 23 (7%)          |
|              | 5 (Extremely)  | 0                        | 2 (3%)            | 2 (2%)                      | 2 (2%)                             | 6 (2%)           |
| Study day 25 | n              | 0                        | 66                | 132                         | 124                                | 322              |
|              | 1 (Not at all) | 0                        | 4 (6%)            | 7 (5%)                      | 18 (15%)                           | 29 (9%)          |
|              | 2 (Slightly)   | 0                        | 32 (48%)          | 62 (47%)                    | 62 (50%)                           | 156 (48%)        |
|              | 3 (Moderately) | 0                        | 28 (42%)          | 48 (36%)                    | 36 (29%)                           | 112 (35%)        |
|              | 4 (Severely)   | 0                        | 2 (3%)            | 13 (10%)                    | 6 (5%)                             | 21 (7%)          |
|              | 5 (Extremely)  | 0                        | 0                 | 2 (2%)                      | 2 (2%)                             | 4 (1%)           |
| Study day 26 | n              | 0                        | 63                | 134                         | 123                                | 320              |
|              | 1 (Not at all) | 0                        | 6 (10%)           | 7 (5%)                      | 20 (16%)                           | 33 (10%)         |
|              | 2 (Slightly)   | 0                        | 24 (38%)          | 62 (46%)                    | 66 (54%)                           | 152 (48%)        |
|              | 3 (Moderately) | 0                        | 30 (48%)          | 50 (37%)                    | 27 (22%)                           | 107 (33%)        |
|              | 4 (Severely)   | 0                        | 3 (5%)            | 14 (10%)                    | 8 (7%)                             | 25 (8%)          |
|              | 5 (Extremely)  | 0                        | 0                 | 1 (<1%)                     | 2 (2%)                             | 3 (<1%)          |

264

dln73797: /arenv/arprod/ccil8781\_gr33343/asq112989/final/drivers/glass\_t001.sas 27JUL2010 20:10

Protocol: ASQ112989  
Population: Run-in

Page 11 of 14

Table 3.10  
Summary of Global Assessment of Shortness of Breath

| Day           | Response       | Run-in failure (N=52) | Placebo (N=75) | SAL 50mcg BID (N=152) | FSC 250/50mcg BID (N=139) | Total (N=418) |
|---------------|----------------|-----------------------|----------------|-----------------------|---------------------------|---------------|
| Study day 27  | n              | 0                     | 64             | 132                   | 119                       | 315           |
|               | 1 (Not at all) | 0                     | 5 (8%)         | 8 (6%)                | 12 (10%)                  | 25 (8%)       |
|               | 2 (Slightly)   | 0                     | 29 (45%)       | 57 (43%)              | 64 (54%)                  | 150 (48%)     |
|               | 3 (Moderately) | 0                     | 30 (47%)       | 55 (42%)              | 35 (29%)                  | 120 (38%)     |
|               | 4 (Severely)   | 0                     | 0              | 10 (8%)               | 8 (7%)                    | 18 (6%)       |
| 5 (Extremely) | 0              | 0                     | 2 (2%)         | 0                     | 2 (<1%)                   |               |
| Study day 28  | n              | 0                     | 65             | 135                   | 123                       | 323           |
|               | 1 (Not at all) | 0                     | 4 (6%)         | 8 (6%)                | 8 (7%)                    | 20 (6%)       |
|               | 2 (Slightly)   | 0                     | 36 (55%)       | 66 (49%)              | 68 (55%)                  | 170 (53%)     |
|               | 3 (Moderately) | 0                     | 23 (35%)       | 48 (36%)              | 33 (27%)                  | 104 (32%)     |
|               | 4 (Severely)   | 0                     | 2 (3%)         | 12 (9%)               | 13 (11%)                  | 27 (8%)       |
| 5 (Extremely) | 0              | 0                     | 1 (<1%)        | 1 (<1%)               | 2 (<1%)                   |               |
| Study day 29  | n              | 0                     | 64             | 133                   | 119                       | 316           |
|               | 1 (Not at all) | 0                     | 5 (8%)         | 9 (7%)                | 9 (8%)                    | 23 (7%)       |
|               | 2 (Slightly)   | 0                     | 32 (50%)       | 61 (46%)              | 65 (55%)                  | 158 (50%)     |
|               | 3 (Moderately) | 0                     | 27 (42%)       | 52 (39%)              | 36 (30%)                  | 115 (36%)     |
|               | 4 (Severely)   | 0                     | 0              | 10 (8%)               | 8 (7%)                    | 18 (6%)       |
| 5 (Extremely) | 0              | 0                     | 1 (<1%)        | 1 (<1%)               | 2 (<1%)                   |               |
| Study day 30  | n              | 0                     | 62             | 127                   | 122                       | 311           |
|               | 1 (Not at all) | 0                     | 5 (8%)         | 8 (6%)                | 13 (11%)                  | 26 (8%)       |
|               | 2 (Slightly)   | 0                     | 29 (47%)       | 59 (46%)              | 64 (52%)                  | 152 (49%)     |
|               | 3 (Moderately) | 0                     | 28 (45%)       | 48 (38%)              | 34 (28%)                  | 110 (35%)     |
|               | 4 (Severely)   | 0                     | 0              | 10 (8%)               | 10 (8%)                   | 20 (6%)       |
| 5 (Extremely) | 0              | 0                     | 2 (2%)         | 1 (<1%)               | 3 (<1%)                   |               |

265

dln73797: /arenv/arprod/ccil8781\_gr33343/asq112989/final/drivers/glass\_t001.sas 27JUL2010 20:10

Protocol: ASQ112989  
Population: Run-in

Page 12 of 14

Table 3.10  
Summary of Global Assessment of Shortness of Breath

| Day          | Response       | Run-in failure<br>(N=52) | Placebo<br>(N=75) | SAL 50mcg<br>BID<br>(N=152) | FSC<br>250/50mcg<br>BID<br>(N=139) | Total<br>(N=418) |
|--------------|----------------|--------------------------|-------------------|-----------------------------|------------------------------------|------------------|
| Study day 31 | n              | 0                        | 63                | 129                         | 121                                | 313              |
|              | 1 (Not at all) | 0                        | 7 (11%)           | 9 (7%)                      | 14 (12%)                           | 30 (10%)         |
|              | 2 (Slightly)   | 0                        | 29 (46%)          | 60 (47%)                    | 67 (55%)                           | 156 (50%)        |
|              | 3 (Moderately) | 0                        | 24 (38%)          | 44 (34%)                    | 32 (26%)                           | 100 (32%)        |
|              | 4 (Severely)   | 0                        | 3 (5%)            | 15 (12%)                    | 7 (6%)                             | 25 (8%)          |
|              | 5 (Extremely)  | 0                        | 0                 | 1 (<1%)                     | 1 (<1%)                            | 2 (<1%)          |
| Study day 32 | n              | 0                        | 63                | 126                         | 119                                | 308              |
|              | 1 (Not at all) | 0                        | 6 (10%)           | 10 (8%)                     | 13 (11%)                           | 29 (9%)          |
|              | 2 (Slightly)   | 0                        | 28 (44%)          | 51 (40%)                    | 61 (51%)                           | 140 (45%)        |
|              | 3 (Moderately) | 0                        | 27 (43%)          | 52 (41%)                    | 34 (29%)                           | 113 (37%)        |
|              | 4 (Severely)   | 0                        | 2 (3%)            | 13 (10%)                    | 9 (8%)                             | 24 (8%)          |
|              | 5 (Extremely)  | 0                        | 0                 | 0                           | 2 (2%)                             | 2 (<1%)          |
| Study day 33 | n              | 0                        | 66                | 130                         | 123                                | 319              |
|              | 1 (Not at all) | 0                        | 6 (9%)            | 6 (5%)                      | 14 (11%)                           | 26 (8%)          |
|              | 2 (Slightly)   | 0                        | 30 (45%)          | 66 (51%)                    | 65 (53%)                           | 161 (50%)        |
|              | 3 (Moderately) | 0                        | 29 (44%)          | 47 (36%)                    | 39 (32%)                           | 115 (36%)        |
|              | 4 (Severely)   | 0                        | 1 (2%)            | 9 (7%)                      | 3 (2%)                             | 13 (4%)          |
|              | 5 (Extremely)  | 0                        | 0                 | 2 (2%)                      | 2 (2%)                             | 4 (1%)           |
| Study day 34 | n              | 0                        | 67                | 130                         | 118                                | 315              |
|              | 1 (Not at all) | 0                        | 6 (9%)            | 9 (7%)                      | 13 (11%)                           | 28 (9%)          |
|              | 2 (Slightly)   | 0                        | 29 (43%)          | 61 (47%)                    | 68 (58%)                           | 158 (50%)        |
|              | 3 (Moderately) | 0                        | 30 (45%)          | 47 (36%)                    | 31 (26%)                           | 108 (34%)        |
|              | 4 (Severely)   | 0                        | 2 (3%)            | 12 (9%)                     | 5 (4%)                             | 19 (6%)          |
|              | 5 (Extremely)  | 0                        | 0                 | 1 (<1%)                     | 1 (<1%)                            | 2 (<1%)          |

dln73797: /arenv/arprod/ccil8781\_gr33343/asq112989/final/drivers/glass\_t001.sas 27JUL2010 20:10

Protocol: ASQ112989  
Population: Run-in

Page 13 of 14

Table 3.10  
Summary of Global Assessment of Shortness of Breath

| Day          | Response       | Run-in failure (N=52) | Placebo (N=75) | SAL 50mcg BID (N=152) | FSC 250/50mcg BID (N=139) | Total (N=418) |
|--------------|----------------|-----------------------|----------------|-----------------------|---------------------------|---------------|
| Study day 35 | n              | 0                     | 68             | 129                   | 118                       | 315           |
|              | 1 (Not at all) | 0                     | 3 (4%)         | 10 (8%)               | 13 (11%)                  | 26 (8%)       |
|              | 2 (Slightly)   | 0                     | 27 (40%)       | 62 (48%)              | 63 (53%)                  | 152 (48%)     |
|              | 3 (Moderately) | 0                     | 37 (54%)       | 42 (33%)              | 35 (30%)                  | 114 (36%)     |
|              | 4 (Severely)   | 0                     | 1 (1%)         | 13 (10%)              | 5 (4%)                    | 19 (6%)       |
|              | 5 (Extremely)  | 0                     | 0              | 2 (2%)                | 2 (2%)                    | 4 (1%)        |
| Study day 36 | n              | 0                     | 64             | 129                   | 116                       | 309           |
|              | 1 (Not at all) | 0                     | 3 (5%)         | 8 (6%)                | 18 (16%)                  | 29 (9%)       |
|              | 2 (Slightly)   | 0                     | 34 (53%)       | 63 (49%)              | 56 (48%)                  | 153 (50%)     |
|              | 3 (Moderately) | 0                     | 25 (39%)       | 46 (36%)              | 35 (30%)                  | 106 (34%)     |
|              | 4 (Severely)   | 0                     | 2 (3%)         | 10 (8%)               | 5 (4%)                    | 17 (6%)       |
|              | 5 (Extremely)  | 0                     | 0              | 2 (2%)                | 2 (2%)                    | 4 (1%)        |
| Study day 37 | n              | 0                     | 65             | 128                   | 114                       | 307           |
|              | 1 (Not at all) | 0                     | 5 (8%)         | 9 (7%)                | 12 (11%)                  | 26 (8%)       |
|              | 2 (Slightly)   | 0                     | 29 (45%)       | 59 (46%)              | 59 (52%)                  | 147 (48%)     |
|              | 3 (Moderately) | 0                     | 29 (45%)       | 49 (38%)              | 33 (29%)                  | 111 (36%)     |
|              | 4 (Severely)   | 0                     | 2 (3%)         | 10 (8%)               | 9 (8%)                    | 21 (7%)       |
|              | 5 (Extremely)  | 0                     | 0              | 1 (<1%)               | 1 (<1%)                   | 2 (<1%)       |
| Study day 38 | n              | 0                     | 64             | 127                   | 111                       | 302           |
|              | 1 (Not at all) | 0                     | 4 (6%)         | 8 (6%)                | 12 (11%)                  | 24 (8%)       |
|              | 2 (Slightly)   | 0                     | 34 (53%)       | 60 (47%)              | 54 (49%)                  | 148 (49%)     |
|              | 3 (Moderately) | 0                     | 24 (38%)       | 51 (40%)              | 36 (32%)                  | 111 (37%)     |
|              | 4 (Severely)   | 0                     | 2 (3%)         | 6 (5%)                | 7 (6%)                    | 15 (5%)       |
|              | 5 (Extremely)  | 0                     | 0              | 2 (2%)                | 2 (2%)                    | 4 (1%)        |

267

dln73797: /arenv/arprod/ccil8781\_gr33343/asq112989/final/drivers/glass\_t001.sas 27JUL2010 20:10

Protocol: ASQ112989  
Population: Run-in

Page 14 of 14

Table 3.10  
Summary of Global Assessment of Shortness of Breath

| Day          | Response       | Run-in failure<br>(N=52) | Placebo<br>(N=75) | SAL 50mcg<br>BID<br>(N=152) | FSC<br>250/50mcg<br>BID<br>(N=139) | Total<br>(N=418) |
|--------------|----------------|--------------------------|-------------------|-----------------------------|------------------------------------|------------------|
| Study day 39 | n              | 0                        | 61                | 129                         | 113                                | 303              |
|              | 1 (Not at all) | 0                        | 5 (8%)            | 11 (9%)                     | 15 (13%)                           | 31 (10%)         |
|              | 2 (Slightly)   | 0                        | 29 (48%)          | 59 (46%)                    | 57 (50%)                           | 145 (48%)        |
|              | 3 (Moderately) | 0                        | 25 (41%)          | 47 (36%)                    | 31 (27%)                           | 103 (34%)        |
|              | 4 (Severely)   | 0                        | 2 (3%)            | 12 (9%)                     | 7 (6%)                             | 21 (7%)          |
|              | 5 (Extremely)  | 0                        | 0                 | 0                           | 3 (3%)                             | 3 (<1%)          |
| Study day 40 | n              | 0                        | 65                | 125                         | 107                                | 297              |
|              | 1 (Not at all) | 0                        | 5 (8%)            | 10 (8%)                     | 10 (9%)                            | 25 (8%)          |
|              | 2 (Slightly)   | 0                        | 31 (48%)          | 56 (45%)                    | 56 (52%)                           | 143 (48%)        |
|              | 3 (Moderately) | 0                        | 27 (42%)          | 47 (38%)                    | 30 (28%)                           | 104 (35%)        |
|              | 4 (Severely)   | 0                        | 2 (3%)            | 12 (10%)                    | 9 (8%)                             | 23 (8%)          |
|              | 5 (Extremely)  | 0                        | 0                 | 0                           | 2 (2%)                             | 2 (<1%)          |
| Study day 41 | n              | 0                        | 61                | 115                         | 97                                 | 273              |
|              | 1 (Not at all) | 0                        | 7 (11%)           | 9 (8%)                      | 11 (11%)                           | 27 (10%)         |
|              | 2 (Slightly)   | 0                        | 26 (43%)          | 51 (44%)                    | 49 (51%)                           | 126 (46%)        |
|              | 3 (Moderately) | 0                        | 27 (44%)          | 43 (37%)                    | 24 (25%)                           | 94 (34%)         |
|              | 4 (Severely)   | 0                        | 1 (2%)            | 11 (10%)                    | 10 (10%)                           | 22 (8%)          |
|              | 5 (Extremely)  | 0                        | 0                 | 1 (<1%)                     | 3 (3%)                             | 4 (1%)           |
| Study day 42 | n              | 0                        | 48                | 84                          | 73                                 | 205              |
|              | 1 (Not at all) | 0                        | 4 (8%)            | 5 (6%)                      | 9 (12%)                            | 18 (9%)          |
|              | 2 (Slightly)   | 0                        | 28 (58%)          | 36 (43%)                    | 33 (45%)                           | 97 (47%)         |
|              | 3 (Moderately) | 0                        | 15 (31%)          | 34 (40%)                    | 26 (36%)                           | 75 (37%)         |
|              | 4 (Severely)   | 0                        | 1 (2%)            | 8 (10%)                     | 5 (7%)                             | 14 (7%)          |
|              | 5 (Extremely)  | 0                        | 0                 | 1 (1%)                      | 0                                  | 1 (<1%)          |

dln73797: /arenv/arprod/ccil8781\_gr33343/asq112989/final/drivers/glass\_t001.sas 27JUL2010 20:10



Protocol: ASQ112989  
Population: Run-in

Page 1 of 3

Table 3.11  
Summary of PGAC

| Visit         | Response        | Run-in failure (N=52) | Placebo (N=75) | SAL 50mcg BID (N=152) | FSC 250/50mcg BID (N=139) | Total (N=418) |
|---------------|-----------------|-----------------------|----------------|-----------------------|---------------------------|---------------|
| Run-in week 1 | n               | 27                    | 66             | 143                   | 123                       | 359           |
|               | 1 (Much worse)  | 0                     | 0              | 5 (3%)                | 1 (<1%)                   | 6 (2%)        |
|               | 2 (Worse)       | 6 (22%)               | 12 (18%)       | 29 (20%)              | 28 (23%)                  | 75 (21%)      |
|               | 3 (No change)   | 17 (63%)              | 46 (70%)       | 89 (62%)              | 74 (60%)                  | 226 (63%)     |
|               | 4 (Better)      | 1 (4%)                | 8 (12%)        | 18 (13%)              | 18 (15%)                  | 45 (13%)      |
|               | 5 (Much better) | 3 (11%)               | 0              | 2 (1%)                | 2 (2%)                    | 7 (2%)        |
| Run-in week 2 | n               | 18                    | 69             | 140                   | 128                       | 355           |
|               | 1 (Much worse)  | 2 (11%)               | 1 (1%)         | 4 (3%)                | 5 (4%)                    | 12 (3%)       |
|               | 2 (Worse)       | 4 (22%)               | 16 (23%)       | 31 (22%)              | 29 (23%)                  | 80 (23%)      |
|               | 3 (No change)   | 7 (39%)               | 44 (64%)       | 81 (58%)              | 74 (58%)                  | 206 (58%)     |
|               | 4 (Better)      | 5 (28%)               | 8 (12%)        | 21 (15%)              | 20 (16%)                  | 54 (15%)      |
|               | 5 (Much better) | 0                     | 0              | 3 (2%)                | 0                         | 3 (<1%)       |
| Study day 8   | n               | 0                     | 67             | 134                   | 124                       | 325           |
|               | 1 (Much worse)  | 0                     | 1 (1%)         | 1 (<1%)               | 0                         | 2 (<1%)       |
|               | 2 (Worse)       | 0                     | 14 (21%)       | 10 (7%)               | 8 (6%)                    | 32 (10%)      |
|               | 3 (No change)   | 0                     | 31 (46%)       | 81 (60%)              | 64 (52%)                  | 176 (54%)     |
|               | 4 (Better)      | 0                     | 19 (28%)       | 38 (28%)              | 49 (40%)                  | 106 (33%)     |
|               | 5 (Much better) | 0                     | 2 (3%)         | 4 (3%)                | 3 (2%)                    | 9 (3%)        |
| Study day 15  | n               | 0                     | 65             | 132                   | 123                       | 320           |
|               | 1 (Much worse)  | 0                     | 2 (3%)         | 1 (<1%)               | 1 (<1%)                   | 4 (1%)        |
|               | 2 (Worse)       | 0                     | 10 (15%)       | 16 (12%)              | 13 (11%)                  | 39 (12%)      |
|               | 3 (No change)   | 0                     | 36 (55%)       | 76 (58%)              | 67 (54%)                  | 179 (56%)     |
|               | 4 (Better)      | 0                     | 16 (25%)       | 33 (25%)              | 40 (33%)                  | 89 (28%)      |
|               | 5 (Much better) | 0                     | 1 (2%)         | 6 (5%)                | 2 (2%)                    | 9 (3%)        |

269

sam31676: /arenv/arprod/ccil8781\_gr33343/asq112989/final/drivers/pgac\_t001.sas 29JUL2010 10:38

CONFIDENTIAL

ASQ112989

Protocol: ASQ112989  
Population: Run-in

Page 2 of 3

Table 3.11  
Summary of PGAC

| Visit        | Response        | Run-in failure<br>(N=52) | Placebo<br>(N=75) | SAL 50mcg<br>BID<br>(N=152) | FSC<br>250/50mcg<br>BID<br>(N=139) | Total<br>(N=418) |
|--------------|-----------------|--------------------------|-------------------|-----------------------------|------------------------------------|------------------|
| Study day 22 | n               | 0                        | 64                | 129                         | 124                                | 317              |
|              | 1 (Much worse)  | 0                        | 2 (3%)            | 3 (2%)                      | 1 (<1%)                            | 6 (2%)           |
|              | 2 (Worse)       | 0                        | 9 (14%)           | 17 (13%)                    | 19 (15%)                           | 45 (14%)         |
|              | 3 (No change)   | 0                        | 39 (61%)          | 69 (53%)                    | 68 (55%)                           | 176 (56%)        |
|              | 4 (Better)      | 0                        | 12 (19%)          | 36 (28%)                    | 29 (23%)                           | 77 (24%)         |
|              | 5 (Much better) | 0                        | 2 (3%)            | 4 (3%)                      | 7 (6%)                             | 13 (4%)          |
| Study day 29 | n               | 0                        | 61                | 126                         | 117                                | 304              |
|              | 1 (Much worse)  | 0                        | 0                 | 3 (2%)                      | 0                                  | 3 (<1%)          |
|              | 2 (Worse)       | 0                        | 6 (10%)           | 15 (12%)                    | 18 (15%)                           | 39 (13%)         |
|              | 3 (No change)   | 0                        | 41 (67%)          | 80 (63%)                    | 73 (62%)                           | 194 (64%)        |
|              | 4 (Better)      | 0                        | 11 (18%)          | 22 (17%)                    | 21 (18%)                           | 54 (18%)         |
|              | 5 (Much better) | 0                        | 3 (5%)            | 6 (5%)                      | 5 (4%)                             | 14 (5%)          |
| Study day 36 | n               | 0                        | 61                | 123                         | 114                                | 298              |
|              | 1 (Much worse)  | 0                        | 0                 | 0                           | 0                                  | 0                |
|              | 2 (Worse)       | 0                        | 11 (18%)          | 16 (13%)                    | 20 (18%)                           | 47 (16%)         |
|              | 3 (No change)   | 0                        | 36 (59%)          | 79 (64%)                    | 57 (50%)                           | 172 (58%)        |
|              | 4 (Better)      | 0                        | 11 (18%)          | 24 (20%)                    | 32 (28%)                           | 67 (22%)         |
|              | 5 (Much better) | 0                        | 3 (5%)            | 4 (3%)                      | 5 (4%)                             | 12 (4%)          |
| Study day 43 | n               | 0                        | 27                | 57                          | 50                                 | 134              |
|              | 1 (Much worse)  | 0                        | 0                 | 3 (5%)                      | 1 (2%)                             | 4 (3%)           |
|              | 2 (Worse)       | 0                        | 2 (7%)            | 3 (5%)                      | 5 (10%)                            | 10 (7%)          |
|              | 3 (No change)   | 0                        | 17 (63%)          | 35 (61%)                    | 30 (60%)                           | 82 (61%)         |
|              | 4 (Better)      | 0                        | 7 (26%)           | 13 (23%)                    | 11 (22%)                           | 31 (23%)         |
|              | 5 (Much better) | 0                        | 1 (4%)            | 3 (5%)                      | 3 (6%)                             | 7 (5%)           |

sam31676: /arenv/arprod/ccil8781\_gr33343/asq112989/final/drivers/pgac\_t001.sas 29JUL2010 10:38

Protocol: ASQ112989  
 Population: Run-in

Page 3 of 3

Table 3.11  
 Summary of PGAC

| Visit                            | Response        | Run-in failure<br>(N=52) | Placebo<br>(N=75) | SAL 50mcg<br>BID<br>(N=152) | FSC<br>250/50mcg<br>BID<br>(N=139) | Total<br>(N=418) |
|----------------------------------|-----------------|--------------------------|-------------------|-----------------------------|------------------------------------|------------------|
| Last treatment week (Visit 3/PD) | n               | 0                        | 36                | 68                          | 63                                 | 167              |
|                                  | 1 (Much worse)  | 0                        | 0                 | 0                           | 1 (2%)                             | 1 (<1%)          |
|                                  | 2 (Worse)       | 0                        | 5 (14%)           | 5 (7%)                      | 2 (3%)                             | 12 (7%)          |
|                                  | 3 (No change)   | 0                        | 20 (56%)          | 43 (63%)                    | 41 (65%)                           | 104 (62%)        |
|                                  | 4 (Better)      | 0                        | 9 (25%)           | 16 (24%)                    | 15 (24%)                           | 40 (24%)         |
|                                  | 5 (Much better) | 0                        | 2 (6%)            | 4 (6%)                      | 4 (6%)                             | 10 (6%)          |

271

sam31676: /arenv/arprod/ccil18781\_gr33343/asq112989/final/drivers/pgac\_t001.sas 29JUL2010 10:38

CONFIDENTIAL

ASQ112989

Protocol: ASQ112989  
Population: Run-in

Page 1 of 2

Table 3.12  
Summary of PGAC Response

| Visit         | Response       | Run-in failure<br>(N=52) | Placebo<br>(N=75) | SAL 50mcg<br>BID<br>(N=152) | FSC<br>250/50mcg<br>BID<br>(N=139) | Total<br>(N=418) |
|---------------|----------------|--------------------------|-------------------|-----------------------------|------------------------------------|------------------|
| Run-in week 1 | n              | 27                       | 66                | 143                         | 123                                | 359              |
|               | Responders     | 4 (15%)                  | 8 (12%)           | 20 (14%)                    | 20 (16%)                           | 52 (14%)         |
|               | Non-responders | 23 (85%)                 | 58 (88%)          | 123 (86%)                   | 103 (84%)                          | 307 (86%)        |
| Run-in week 2 | n              | 18                       | 69                | 140                         | 128                                | 355              |
|               | Responders     | 5 (28%)                  | 8 (12%)           | 24 (17%)                    | 20 (16%)                           | 57 (16%)         |
|               | Non-responders | 13 (72%)                 | 61 (88%)          | 116 (83%)                   | 108 (84%)                          | 298 (84%)        |
| Study day 8   | n              | 0                        | 67                | 134                         | 124                                | 325              |
|               | Responders     | 0                        | 21 (31%)          | 42 (31%)                    | 52 (42%)                           | 115 (35%)        |
|               | Non-responders | 0                        | 46 (69%)          | 92 (69%)                    | 72 (58%)                           | 210 (65%)        |
| Study day 15  | n              | 0                        | 65                | 132                         | 123                                | 320              |
|               | Responders     | 0                        | 17 (26%)          | 39 (30%)                    | 42 (34%)                           | 98 (31%)         |
|               | Non-responders | 0                        | 48 (74%)          | 93 (70%)                    | 81 (66%)                           | 222 (69%)        |
| Study day 22  | n              | 0                        | 64                | 129                         | 124                                | 317              |
|               | Responders     | 0                        | 14 (22%)          | 40 (31%)                    | 36 (29%)                           | 90 (28%)         |
|               | Non-responders | 0                        | 50 (78%)          | 89 (69%)                    | 88 (71%)                           | 227 (72%)        |
| Study day 29  | n              | 0                        | 61                | 126                         | 117                                | 304              |
|               | Responders     | 0                        | 14 (23%)          | 28 (22%)                    | 26 (22%)                           | 68 (22%)         |
|               | Non-responders | 0                        | 47 (77%)          | 98 (78%)                    | 91 (78%)                           | 236 (78%)        |
| Study day 36  | n              | 0                        | 61                | 123                         | 114                                | 298              |
|               | Responders     | 0                        | 14 (23%)          | 28 (23%)                    | 37 (32%)                           | 79 (27%)         |
|               | Non-responders | 0                        | 47 (77%)          | 95 (77%)                    | 77 (68%)                           | 219 (73%)        |

A PGAC responder is defined as a subject who had a response of "better" or "much better".  
A PGAC non-responder is defined as a subject who had a response of "much worse", "worse" or "no change".  
sam31676: /arenv/arprod/ccil8781\_gr33343/asq112989/final/drivers/pgac\_t002.sas 29JUL2010 10:38

Protocol: ASQ112989  
Population: Run-in

Page 2 of 2

Table 3.12  
Summary of PGAC Response

| Visit                            | Response       | Run-in failure<br>(N=52) | Placebo<br>(N=75) | SAL 50mcg<br>BID<br>(N=152) | FSC<br>250/50mcg<br>BID<br>(N=139) | Total<br>(N=418) |
|----------------------------------|----------------|--------------------------|-------------------|-----------------------------|------------------------------------|------------------|
| Study day 43                     | n              | 0                        | 27                | 57                          | 50                                 | 134              |
|                                  | Responders     | 0                        | 8 (30%)           | 16 (28%)                    | 14 (28%)                           | 38 (28%)         |
|                                  | Non-responders | 0                        | 19 (70%)          | 41 (72%)                    | 36 (72%)                           | 96 (72%)         |
| Last treatment week (Visit 3/PD) | n              | 0                        | 36                | 68                          | 63                                 | 167              |
|                                  | Responders     | 0                        | 11 (31%)          | 20 (29%)                    | 19 (30%)                           | 50 (30%)         |
|                                  | Non-responders | 0                        | 25 (69%)          | 48 (71%)                    | 44 (70%)                           | 117 (70%)        |

273

CONFIDENTIAL

ASQ112989

A PGAC responder is defined as a subject who had a response of "better" or "much better".  
A PGAC non-responder is defined as a subject who had a response of "much worse", "worse" or "no change".  
sam31676: /arenv/arprod/ccil8781\_gr33343/asq112989/final/drivers/pgac\_t002.sas 29JUL2010 10:38

Protocol: ASQ112989  
Population: Modified Intent-to-treat

Page 1 of 2

Table 3.13  
Summary of Participant Exit Evaluation

| Question                        | Response                 | Placebo<br>(N=75) | SAL 50mcg<br>BID<br>(N=151) | FSC<br>250/50mcg<br>BID<br>(N=139) | Total<br>(N=365) |
|---------------------------------|--------------------------|-------------------|-----------------------------|------------------------------------|------------------|
| Confident using elec.<br>diary  | n                        | 70                | 142                         | 126                                | 338              |
|                                 | 0 (Very confident)       | 47 (67%)          | 104 (73%)                   | 91 (72%)                           | 242 (72%)        |
|                                 | 1 (Somewhat confident)   | 14 (20%)          | 28 (20%)                    | 19 (15%)                           | 61 (18%)         |
|                                 | 2 (Neutral)              | 7 (10%)           | 4 (3%)                      | 12 (10%)                           | 23 (7%)          |
|                                 | 3 (Somewhat unconfident) | 2 (3%)            | 2 (1%)                      | 1 (<1%)                            | 5 (1%)           |
|                                 | 4 (Very unconfident)     | 0                 | 4 (3%)                      | 3 (2%)                             | 7 (2%)           |
| Overall experience<br>help desk | n                        | 70                | 142                         | 126                                | 338              |
|                                 | 0 (Did not use)          | 51 (73%)          | 113 (80%)                   | 88 (70%)                           | 252 (75%)        |
|                                 | 1 (Very good)            | 9 (13%)           | 13 (9%)                     | 23 (18%)                           | 45 (13%)         |
|                                 | 2 (Good)                 | 7 (10%)           | 7 (5%)                      | 7 (6%)                             | 21 (6%)          |
|                                 | 3 (Neutral)              | 2 (3%)            | 7 (5%)                      | 7 (6%)                             | 16 (5%)          |
|                                 | 4 (Poor)                 | 1 (1%)            | 2 (1%)                      | 0                                  | 3 (<1%)          |
|                                 | 5 (Very poor)            | 0                 | 0                           | 1 (<1%)                            | 1 (<1%)          |
| Easy to use electronic<br>diary | n                        | 70                | 142                         | 126                                | 338              |
|                                 | 0 (Very good)            | 26 (37%)          | 62 (44%)                    | 53 (42%)                           | 141 (42%)        |
|                                 | 1 (Good)                 | 31 (44%)          | 64 (45%)                    | 51 (40%)                           | 146 (43%)        |
|                                 | 2 (Neutral)              | 11 (16%)          | 11 (8%)                     | 17 (13%)                           | 39 (12%)         |
|                                 | 3 (Poor)                 | 2 (3%)            | 5 (4%)                      | 4 (3%)                             | 11 (3%)          |
|                                 | 4 (Very poor)            | 0                 | 0                           | 1 (<1%)                            | 1 (<1%)          |

274

sam31676: /arenv/arprod/ccil8781\_gr33343/asq112989/final/drivers/pexitev\_t001.sas 19AUG2010 13:47

Protocol: ASQ112989  
 Population: Modified Intent-to-treat

Page 2 of 2

Table 3.13  
 Summary of Participant Exit Evaluation

| Question                       | Response               | Placebo<br>(N=75) |       | SAL 50mcg<br>BID<br>(N=151) |       | FSC<br>250/50mcg<br>BID<br>(N=139) |       | Total<br>(N=365) |       |
|--------------------------------|------------------------|-------------------|-------|-----------------------------|-------|------------------------------------|-------|------------------|-------|
|                                |                        |                   |       |                             |       |                                    |       |                  |       |
| Longest eDiary completion      | 0 (2 weeks)            | 2                 | (3%)  | 7                           | (5%)  | 6                                  | (5%)  | 15               | (4%)  |
|                                | 1 (1 month)            | 7                 | (10%) | 11                          | (8%)  | 15                                 | (12%) | 33               | (10%) |
|                                | 2 (3 months)           | 11                | (16%) | 32                          | (23%) | 37                                 | (29%) | 80               | (24%) |
|                                | 3 (6 months)           | 19                | (27%) | 18                          | (13%) | 17                                 | (13%) | 54               | (16%) |
|                                | 4 (9 months)           | 2                 | (3%)  | 3                           | (2%)  | 1                                  | (<1%) | 6                | (2%)  |
|                                | 5 (1 year or more)     | 29                | (41%) | 71                          | (50%) | 49                                 | (39%) | 149              | (44%) |
| Participate using eDiary again | 0 (Very willing)       | 39                | (56%) | 85                          | (60%) | 80                                 | (63%) | 204              | (60%) |
|                                | 1 (Willing)            | 23                | (33%) | 40                          | (28%) | 34                                 | (27%) | 97               | (29%) |
|                                | 2 (Neutral)            | 7                 | (10%) | 13                          | (9%)  | 11                                 | (9%)  | 31               | (9%)  |
|                                | 3 (Unwilling)          | 1                 | (1%)  | 2                           | (1%)  | 0                                  |       | 3                | (<1%) |
|                                | 4 (Very unwilling)     | 0                 |       | 2                           | (1%)  | 1                                  | (<1%) | 3                | (<1%) |
| Rate eDiary completion         | 0 (Very easy)          | 51                | (73%) | 104                         | (73%) | 91                                 | (72%) | 246              | (73%) |
|                                | 1 (Somewhat easy)      | 12                | (17%) | 23                          | (16%) | 24                                 | (19%) | 59               | (17%) |
|                                | 2 (Neutral)            | 3                 | (4%)  | 2                           | (1%)  | 7                                  | (6%)  | 12               | (4%)  |
|                                | 3 (Somewhat difficult) | 4                 | (6%)  | 12                          | (8%)  | 3                                  | (2%)  | 19               | (6%)  |
|                                | 4 (Very difficult)     | 0                 |       | 1                           | (<1%) | 1                                  | (<1%) | 2                | (<1%) |
| Rate use of eDiary             | 0 (Very easy)          | 49                | (70%) | 105                         | (74%) | 92                                 | (73%) | 246              | (73%) |
|                                | 1 (Somewhat easy)      | 14                | (20%) | 21                          | (15%) | 21                                 | (17%) | 56               | (17%) |
|                                | 2 (Neutral)            | 2                 | (3%)  | 7                           | (5%)  | 7                                  | (6%)  | 16               | (5%)  |
|                                | 3 (Somewhat difficult) | 5                 | (7%)  | 8                           | (6%)  | 5                                  | (4%)  | 18               | (5%)  |
|                                | 4 (Very difficult)     | 0                 |       | 1                           | (<1%) | 1                                  | (<1%) | 2                | (<1%) |

275

sam31676: /arenv/arprod/ccil8781\_gr33343/asq112989/final/drivers/pexitev\_t001.sas 19AUG2010 13:47

CONFIDENTIAL

ASQ112989

Protocol: ASQ112989  
 Population: Modified Intent-to-treat

Page 1 of 1

Table 3.14  
 Summary of FEV1

|            |        | Placebo<br>(N=75) | SAL 50mcg<br>BID (N=151) | FSC<br>250/50mcg<br>BID (N=139) | Total<br>(N=365) |
|------------|--------|-------------------|--------------------------|---------------------------------|------------------|
| Visit 2    | n      | 75                | 151                      | 139                             | 365              |
|            | Mean   | 1.332             | 1.427                    | 1.402                           | 1.398            |
|            | SD     | 0.5267            | 0.5568                   | 0.5639                          | 0.5531           |
|            | Median | 1.240             | 1.360                    | 1.310                           | 1.330            |
|            | Min.   | 0.43              | 0.41                     | 0.36                            | 0.36             |
|            | Max.   | 3.39              | 3.07                     | 2.93                            | 3.39             |
| Visit 3/PD | n      | 73                | 148                      | 135                             | 356              |
|            | Mean   | 1.336             | 1.494                    | 1.549                           | 1.483            |
|            | SD     | 0.5357            | 0.5553                   | 0.6242                          | 0.5823           |
|            | Median | 1.280             | 1.415                    | 1.510                           | 1.400            |
|            | Min.   | 0.46              | 0.54                     | 0.46                            | 0.46             |
|            | Max.   | 3.45              | 3.22                     | 3.75                            | 3.75             |

276

tlc19199: /arenv/arprod/ccil8781\_gr33343/asq112989/final/drivers/pft\_t001.sas 24AUG2010 01:57

CONFIDENTIAL

ASQ112989



Protocol: ASQ112989  
 Population: Modified Intent-to-treat

Page 1 of 1

Table 3.15  
 Summary of Change from Baseline in FEV1 at Visit 3/PD

|        | Placebo<br>(N=75) | SAL 50mcg<br>BID (N=151) | FSC<br>250/50mcg<br>BID (N=139) | Total<br>(N=365) |
|--------|-------------------|--------------------------|---------------------------------|------------------|
| n      | 73                | 148                      | 135                             | 356              |
| Mean   | 0.001             | 0.061                    | 0.138                           | 0.078            |
| SD     | 0.2352            | 0.2348                   | 0.3445                          | 0.2856           |
| Median | -0.010            | 0.065                    | 0.090                           | 0.060            |
| Min.   | -0.69             | -1.13                    | -0.88                           | -1.13            |
| Max.   | 1.11              | 0.90                     | 2.52                            | 2.52             |

277

CONFIDENTIAL

ASQ112989

tlc19199: /arenv/arprod/ccil8781\_gr33343/asq112989/final/drivers/pft\_t002.sas 24AUG2010 01:57

Protocol: ASQ112989  
 Population: Modified Intent-to-treat

Page 1 of 1

Table 3.16  
 Summary of FEV1 Response at Visit 3/PD

|                             | Placebo<br>(N=75) | SAL 50mcg<br>BID<br>(N=151) | FSC<br>250/50mcg<br>BID<br>(N=139) | Total<br>(N=365) |
|-----------------------------|-------------------|-----------------------------|------------------------------------|------------------|
| 3-Point Response Category n | 73                | 148                         | 135                                | 356              |
| No change or worse          | 45 (62%)          | 67 (45%)                    | 51 (38%)                           | 163 (46%)        |
| Better                      | 10 (14%)          | 25 (17%)                    | 18 (13%)                           | 53 (15%)         |
| Much better                 | 18 (25%)          | 56 (38%)                    | 66 (49%)                           | 140 (39%)        |
| Responder                   | 18 (25%)          | 56 (38%)                    | 66 (49%)                           | 140 (39%)        |
| Non-responder               | 55 (75%)          | 92 (62%)                    | 69 (51%)                           | 216 (61%)        |

278

An FEV1 responder is defined as a subject who had a change from Visit 2 to Visit 3/PD of 100 mL or more.  
 An FEV1 non-responder is defined as a subject who had a change of < 100 mL.  
 sam31676: /arenv/arprod/ccil8781\_gr33343/asq112989/final/drivers/pft\_t003a.sas 29SEP2010 11:27

CONFIDENTIAL

ASQ112989

Protocol: ASQ112989  
 Population: Modified Intent-to-treat

Page 1 of 1

Table 3.17  
 Summary of FVC

|            |        | Placebo<br>(N=75) | SAL 50mcg<br>BID (N=151) | FSC<br>250/50mcg<br>BID (N=139) | Total<br>(N=365) |
|------------|--------|-------------------|--------------------------|---------------------------------|------------------|
| Visit 2    | n      | 75                | 151                      | 139                             | 365              |
|            | Mean   | 2.632             | 2.754                    | 2.598                           | 2.669            |
|            | SD     | 0.7417            | 0.8612                   | 0.8321                          | 0.8277           |
|            | Median | 2.530             | 2.640                    | 2.530                           | 2.560            |
|            | Min.   | 1.11              | 1.05                     | 1.16                            | 1.05             |
|            | Max.   | 5.11              | 5.87                     | 4.68                            | 5.87             |
| Visit 3/PD | n      | 73                | 148                      | 135                             | 356              |
|            | Mean   | 2.636             | 2.853                    | 2.800                           | 2.788            |
|            | SD     | 0.7782            | 0.8259                   | 0.8767                          | 0.8378           |
|            | Median | 2.530             | 2.765                    | 2.760                           | 2.715            |
|            | Min.   | 1.22              | 1.12                     | 1.08                            | 1.08             |
|            | Max.   | 4.96              | 4.75                     | 4.89                            | 4.96             |

279

tlc19199: /arenv/arprod/ccil8781\_gr33343/asq112989/final/drivers/pft\_t004.sas 24AUG2010 01:56

CONFIDENTIAL

ASQ112989

Protocol: ASQ112989  
Population: Modified Intent-to-treat

Table 3.18  
Summary of Change from Baseline in FVC at Visit 3/PD

|        | Placebo<br>(N=75) | SAL 50mcg<br>BID (N=151) | FSC<br>250/50mcg<br>BID (N=139) | Total<br>(N=365) |
|--------|-------------------|--------------------------|---------------------------------|------------------|
| n      | 73                | 148                      | 135                             | 356              |
| Mean   | -0.007            | 0.081                    | 0.180                           | 0.100            |
| SD     | 0.3823            | 0.4154                   | 0.4039                          | 0.4094           |
| Median | -0.030            | 0.105                    | 0.160                           | 0.090            |
| Min.   | -1.35             | -1.53                    | -0.57                           | -1.53            |
| Max.   | 1.79              | 1.63                     | 2.55                            | 2.55             |

For peer review only

280

CONFIDENTIAL

ASQ112989

tlc19199: /arenv/arprod/ccil8781\_gr33343/asq112989/final/drivers/pft\_t005.sas 24AUG2010 01:56

Protocol: ASQ112989  
Population: Run-in

Page 1 of 2

Table 3.19  
Summary of CRQ-SAS Domain Scores

| Domain Score | Visit      |        | Run-in failure (N=52) | Placebo (N=75) | SAL 50mcg BID (N=152) | FSC 250/50mcg BID (N=139) | Total (N=418) |
|--------------|------------|--------|-----------------------|----------------|-----------------------|---------------------------|---------------|
| Dyspnoea     | Visit 2    | n      | 11                    | 75             | 152                   | 139                       | 377           |
|              |            | Mean   | 3.7                   | 4.5            | 4.2                   | 4.3                       | 4.3           |
|              |            | SD     | 1.23                  | 1.18           | 1.36                  | 1.37                      | 1.33          |
|              |            | Median | 3.6                   | 4.6            | 4.3                   | 4.4                       | 4.4           |
|              |            | Min.   | 2                     | 2              | 1                     | 1                         | 1             |
|              | Max.       | 7      | 7                     | 7              | 7                     | 7                         |               |
|              | Visit 3/PD | n      | 0                     | 73             | 149                   | 136                       | 358           |
|              |            | Mean   |                       | 4.6            | 4.5                   | 4.8                       | 4.6           |
|              |            | SD     |                       | 1.17           | 1.35                  | 1.39                      | 1.33          |
|              |            | Median |                       | 4.8            | 4.6                   | 5.0                       | 4.8           |
| Min.         |            |        | 1                     | 1              | 2                     | 1                         |               |
| Fatigue      | Visit 2    | n      | 11                    | 75             | 152                   | 139                       | 377           |
|              |            | Mean   | 3.8                   | 4.0            | 3.6                   | 3.6                       | 3.7           |
|              |            | SD     | 1.71                  | 1.13           | 1.25                  | 1.17                      | 1.22          |
|              |            | Median | 3.8                   | 4.0            | 3.8                   | 3.8                       | 3.8           |
|              |            | Min.   | 1                     | 2              | 1                     | 1                         | 1             |
|              | Max.       | 7      | 6                     | 6              | 6                     | 7                         |               |
|              | Visit 3/PD | n      | 0                     | 73             | 149                   | 136                       | 358           |
|              |            | Mean   |                       | 4.2            | 3.8                   | 3.9                       | 3.9           |
|              |            | SD     |                       | 1.12           | 1.29                  | 1.18                      | 1.22          |
|              |            | Median |                       | 4.0            | 4.0                   | 4.0                       | 4.0           |
| Min.         |            |        | 2                     | 1              | 1                     | 1                         |               |
| Max.         |            | 7      | 7                     | 6              | 7                     |                           |               |

N.B. Each CRQ-SAS domain score is calculated as the mean of responses to the relevant questions and is calculated if at least one response was recorded for the domain.

sam31676: /arenv/arprod/ccil8781\_gr33343/asq112989/final/drivers/crqsas\_t001.sas 30JUL2010 11:08

281

CONFIDENTIAL

ASQ112989

Protocol: ASQ112989  
Population: Run-in

Page 2 of 2

Table 3.19  
Summary of CRQ-SAS Domain Scores

| Domain Score       | Visit      |        | Run-in failure<br>(N=52) | Placebo<br>(N=75) | SAL 50mcg<br>BID (N=152) | FSC<br>250/50mcg<br>BID (N=139) | Total<br>(N=418) |
|--------------------|------------|--------|--------------------------|-------------------|--------------------------|---------------------------------|------------------|
| Emotional Function | Visit 2    | n      | 11                       | 75                | 152                      | 139                             | 377              |
|                    |            | Mean   | 4.1                      | 4.5               | 4.4                      | 4.4                             | 4.4              |
|                    |            | SD     | 1.62                     | 1.05              | 1.18                     | 1.22                            | 1.18             |
|                    |            | Median | 3.9                      | 4.6               | 4.4                      | 4.4                             | 4.4              |
|                    |            | Min.   | 2                        | 2                 | 1                        | 1                               | 1                |
|                    | Max.       | 7      | 7                        | 7                 | 7                        | 7                               |                  |
|                    | Visit 3/PD | n      | 0                        | 73                | 149                      | 136                             | 358              |
|                    |            | Mean   |                          | 4.8               | 4.5                      | 4.5                             | 4.5              |
|                    |            | SD     |                          | 1.14              | 1.28                     | 1.23                            | 1.24             |
|                    |            | Median |                          | 4.7               | 4.4                      | 4.5                             | 4.6              |
| Min.               |            |        | 2                        | 2                 | 1                        | 1                               |                  |
| Max.               |            | 7      | 7                        | 7                 | 7                        |                                 |                  |
| Mastery            | Visit 2    | n      | 11                       | 75                | 152                      | 139                             | 377              |
|                    |            | Mean   | 4.4                      | 4.7               | 4.3                      | 4.5                             | 4.5              |
|                    |            | SD     | 1.61                     | 1.18              | 1.29                     | 1.34                            | 1.30             |
|                    |            | Median | 4.8                      | 4.5               | 4.3                      | 4.5                             | 4.5              |
|                    |            | Min.   | 1                        | 2                 | 1                        | 2                               | 1                |
|                    | Max.       | 7      | 7                        | 7                 | 7                        | 7                               |                  |
|                    | Visit 3/PD | n      | 0                        | 73                | 149                      | 136                             | 358              |
|                    |            | Mean   |                          | 4.9               | 4.7                      | 4.9                             | 4.8              |
|                    |            | SD     |                          | 1.27              | 1.36                     | 1.34                            | 1.34             |
|                    |            | Median |                          | 4.8               | 4.5                      | 5.0                             | 4.8              |
| Min.               |            |        | 2                        | 2                 | 1                        | 1                               |                  |
| Max.               |            | 7      | 7                        | 7                 | 7                        |                                 |                  |

N.B. Each CRQ-SAS domain score is calculated as the mean of responses to the relevant questions and is calculated if at least one response was recorded for the domain.

sam31676: /arenv/arprod/ccil18781\_gr33343/asq112989/final/drivers/crqsas\_t001.sas 30JUL2010 11:08

CONFIDENTIAL

ASQ112989

Protocol: ASQ112989  
 Population: Modified Intent-to-treat

Page 1 of 1

Table 3.20  
 Summary of Change from Baseline in CRQ-SAS Domain Scores at Visit 3/PD

| Domain Score          |        | Placebo<br>(N=75) | SAL 50mcg<br>BID (N=151) | FSC<br>250/50mcg<br>BID (N=139) | Total<br>(N=365) |
|-----------------------|--------|-------------------|--------------------------|---------------------------------|------------------|
| Dyspnoea              | n      | 73                | 149                      | 136                             | 358              |
|                       | Mean   | 0.1               | 0.3                      | 0.4                             | 0.3              |
|                       | SD     | 1.09              | 1.14                     | 0.99                            | 1.08             |
|                       | Median | 0.2               | 0.2                      | 0.4                             | 0.3              |
|                       | Min.   | -5                | -3                       | -2                              | -5               |
|                       | Max.   | 3                 | 3                        | 4                               | 4                |
| Fatigue               | n      | 73                | 149                      | 136                             | 358              |
|                       | Mean   | 0.2               | 0.2                      | 0.3                             | 0.2              |
|                       | SD     | 0.91              | 0.94                     | 1.02                            | 0.97             |
|                       | Median | 0.3               | 0.0                      | 0.3                             | 0.0              |
|                       | Min.   | -2                | -2                       | -2                              | -2               |
|                       | Max.   | 3                 | 3                        | 4                               | 4                |
| Emotional<br>Function | n      | 73                | 149                      | 136                             | 358              |
|                       | Mean   | 0.2               | 0.1                      | 0.1                             | 0.1              |
|                       | SD     | 0.83              | 0.94                     | 0.90                            | 0.91             |
|                       | Median | 0.3               | 0.0                      | 0.0                             | 0.1              |
|                       | Min.   | -2                | -3                       | -2                              | -3               |
|                       | Max.   | 2                 | 3                        | 3                               | 3                |
| Mastery               | n      | 73                | 149                      | 136                             | 358              |
|                       | Mean   | 0.2               | 0.3                      | 0.4                             | 0.3              |
|                       | SD     | 0.96              | 1.04                     | 1.06                            | 1.03             |
|                       | Median | 0.0               | 0.3                      | 0.3                             | 0.3              |
|                       | Min.   | -2                | -2                       | -3                              | -3               |
|                       | Max.   | 3                 | 4                        | 5                               | 5                |

N.B. Each CRQ-SAS domain score is calculated as the mean of responses to the relevant questions and is calculated if at least one response was recorded for the domain.

sam31676: /arenv/arprod/ccil8781\_gr33343/asq112989/final/drivers/crqsas\_t002.sas 30JUL2010 11:08

283

CONFIDENTIAL

ASQ112989

Protocol: ASQ112989  
 Population: Modified Intent-to-treat

Page 1 of 1

Table 3.21  
 Summary of CRQ-SAS Dyspnoea Domain Response

|                             | Placebo<br>(N=75) | SAL 50mcg<br>BID<br>(N=151) | FSC<br>250/50mcg<br>BID<br>(N=139) | Total<br>(N=365) |
|-----------------------------|-------------------|-----------------------------|------------------------------------|------------------|
| 3-Point Response Category n | 73                | 149                         | 136                                | 358              |
| No change or worse          | 34 (47%)          | 65 (44%)                    | 48 (35%)                           | 147 (41%)        |
| Better                      | 14 (19%)          | 33 (22%)                    | 28 (21%)                           | 75 (21%)         |
| Much better                 | 25 (34%)          | 51 (34%)                    | 60 (44%)                           | 136 (38%)        |
| Responder                   | 25 (34%)          | 55 (37%)                    | 63 (46%)                           | 143 (40%)        |
| Non-responder               | 48 (66%)          | 94 (63%)                    | 73 (54%)                           | 215 (60%)        |

284

CRQ-SAS dyspnoea domain responder is defined as a subject who had a change in score for the dyspnoea domain of the CRQ-SAS between Visit 2 and Visit 3/PD of 0.5 units or more. A CRQ-SAS dyspnoea domain non-responder is defined as a subject who had a change in score of less than 0.5 units. N.B. CRQ-SAS dyspnoea domain score is calculated as the mean of responses to questions 1 to 5, and is calculated if at least one response was recorded.

sam31676: /arenv/arprod/ccil8781\_gr33343/asq112989/final/drivers/crqsas\_t003a.sas 29SEP2010 11:36

CONFIDENTIAL

ASQ112989



Protocol: ASQ112989  
Population: Run-in

Page 1 of 1

Table 3.22  
Summary of CGI-S

| Visit      | Response        | Run-in failure<br>(N=52) | Placebo<br>(N=75) | SAL 50mcg<br>BID<br>(N=152) | FSC<br>250/50mcg<br>BID<br>(N=139) | Total<br>(N=418) |
|------------|-----------------|--------------------------|-------------------|-----------------------------|------------------------------------|------------------|
| Visit 2    | n               | 8                        | 75                | 151                         | 139                                | 373              |
|            | 1 (Mild)        | 0                        | 6 (8%)            | 10 (7%)                     | 9 (6%)                             | 25 (7%)          |
|            | 2 (Moderate)    | 6 (75%)                  | 53 (71%)          | 103 (68%)                   | 94 (68%)                           | 256 (69%)        |
|            | 3 (Severe)      | 1 (13%)                  | 15 (20%)          | 37 (25%)                    | 33 (24%)                           | 86 (23%)         |
|            | 4 (Very Severe) | 1 (13%)                  | 1 (1%)            | 1 (<1%)                     | 3 (2%)                             | 6 (2%)           |
| Visit 3/PD | n               | 0                        | 72                | 148                         | 133                                | 353              |
|            | 1 (Mild)        | 0                        | 12 (17%)          | 11 (7%)                     | 33 (25%)                           | 56 (16%)         |
|            | 2 (Moderate)    | 0                        | 43 (60%)          | 111 (75%)                   | 85 (64%)                           | 239 (68%)        |
|            | 3 (Severe)      | 0                        | 17 (24%)          | 26 (18%)                    | 14 (11%)                           | 57 (16%)         |
|            | 4 (Very Severe) | 0                        | 0                 | 0                           | 1 (<1%)                            | 1 (<1%)          |

285

dln73797: /arenv/arprod/ccil8781\_gr33343/asq112989/final/drivers/cgis\_t001.sas 27JUL2010 20:07

CONFIDENTIAL

ASQ112989

Protocol: ASQ112989  
Population: Modified Intent-to-treat

Table 3.23  
Summary of CGI-C

|                 | Placebo<br>(N=75) | SAL 50mcg<br>BID<br>(N=151) | FSC<br>250/50mcg<br>BID<br>(N=139) | Total<br>(N=365) |
|-----------------|-------------------|-----------------------------|------------------------------------|------------------|
| n               | 73                | 149                         | 136                                | 358              |
| 1 (Much worse)  | 1 (1%)            | 0                           | 0                                  | 1 (<1%)          |
| 2 (Worse)       | 13 (18%)          | 14 (9%)                     | 5 (4%)                             | 32 (9%)          |
| 3 (No change)   | 40 (55%)          | 80 (54%)                    | 65 (48%)                           | 185 (52%)        |
| 4 (Better)      | 15 (21%)          | 52 (35%)                    | 61 (45%)                           | 128 (36%)        |
| 5 (Much better) | 4 (5%)            | 3 (2%)                      | 5 (4%)                             | 12 (3%)          |
| Responder       | 19 (26%)          | 55 (37%)                    | 66 (49%)                           | 140 (39%)        |
| Non-responder   | 54 (74%)          | 94 (63%)                    | 70 (51%)                           | 218 (61%)        |

286

CONFIDENTIAL

ASQ112989

A CGI-C responder is defined as a subject who had a response of "better" or "much better".  
A CGI-C non-responder is defined as a subject who had a response of "much worse", "worse" or "no change".  
dln73797: /arenv/arprod/ccil8781\_gr33343/asq112989/final/drivers/cgic\_t001.sas 27JUL2010 20:07

Protocol: ASQ112989  
Population: Run-in

Page 1 of 3

Table 3.24  
Summary of Participant-Completed mMRC Dyspnoea Scale

| Visit     |                                                                                     | Run-in failure (N=52) | Placebo (N=75) | SAL 50mcg BID (N=152) | FSC 250/50mcg BID (N=139) | Total (N=418) |           |
|-----------|-------------------------------------------------------------------------------------|-----------------------|----------------|-----------------------|---------------------------|---------------|-----------|
| Screening | mMRC Score                                                                          | n                     | 51             | 75                    | 152                       | 139           | 417       |
|           |                                                                                     | Mean                  | 2.1            | 2.3                   | 2.3                       | 2.3           | 2.3       |
|           |                                                                                     | SD                    | 0.93           | 0.87                  | 0.84                      | 0.87          | 0.87      |
|           |                                                                                     | Median                | 2.0            | 2.0                   | 2.0                       | 2.0           | 2.0       |
|           |                                                                                     | Min.                  | 0              | 1                     | 0                         | 0             | 0         |
|           |                                                                                     | Max.                  | 4              | 4                     | 4                         | 4             | 4         |
|           | 0 (Not troubled with breathlessness except with strenuous exercise)                 |                       | 2 (4%)         | 0                     | 1 (<1%)                   | 2 (1%)        | 5 (1%)    |
|           | 1 (Troubled by shortness of breath when hurrying on level/walking up slight hill)   |                       | 11 (22%)       | 12 (16%)              | 22 (14%)                  | 20 (14%)      | 65 (16%)  |
|           | 2 (Walks slower than others of same age on level b/c breathlessness)                |                       | 23 (45%)       | 35 (47%)              | 63 (41%)                  | 64 (46%)      | 185 (44%) |
|           | 3 (Stops to breathe after walking about 100 yards/meters or after few min on level) |                       | 12 (24%)       | 20 (27%)              | 55 (36%)                  | 41 (29%)      | 128 (31%) |
|           | 4 (Too breathless to leave house or breathless when dressing or undressing)         |                       | 3 (6%)         | 8 (11%)               | 11 (7%)                   | 12 (9%)       | 34 (8%)   |

287

dln73797: /arenv/arprod/ccil8781\_gr33343/asq112989/final/drivers/mmrc\_t001.sas 27JUL2010 20:07

CONFIDENTIAL

ASQ112989

Protocol: ASQ112989  
Population: Run-in

Table 3.24  
Summary of Participant-Completed mMRC Dyspnoea Scale

| Visit   |                                                                                     | Run-in failure (N=52) | Placebo (N=75) | SAL 50mcg BID (N=152) | FSC 250/50mcg BID (N=139) | Total (N=418) |           |
|---------|-------------------------------------------------------------------------------------|-----------------------|----------------|-----------------------|---------------------------|---------------|-----------|
| Visit 2 | mMRC Score                                                                          | n                     | 11             | 75                    | 152                       | 139           | 377       |
|         |                                                                                     | Mean                  | 2.0            | 1.8                   | 2.0                       | 1.9           | 1.9       |
|         |                                                                                     | SD                    | 1.18           | 0.83                  | 0.97                      | 0.98          | 0.95      |
|         |                                                                                     | Median                | 2.0            | 2.0                   | 2.0                       | 2.0           | 2.0       |
|         |                                                                                     | Min.                  | 1              | 0                     | 0                         | 0             | 0         |
|         |                                                                                     | Max.                  | 4              | 4                     | 4                         | 4             | 4         |
|         | 0 (Not troubled with breathlessness except with strenuous exercise)                 |                       | 0              | 4 (5%)                | 6 (4%)                    | 5 (4%)        | 15 (4%)   |
|         | 1 (Troubled by shortness of breath when hurrying on level/walking up slight hill)   |                       | 5 (45%)        | 21 (28%)              | 43 (28%)                  | 45 (32%)      | 114 (30%) |
|         | 2 (Walks slower than others of same age on level b/c breathlessness)                |                       | 3 (27%)        | 39 (52%)              | 53 (35%)                  | 53 (38%)      | 148 (39%) |
|         | 3 (Stops to breathe after walking about 100 yards/meters or after few min on level) |                       | 1 (9%)         | 9 (12%)               | 42 (28%)                  | 25 (18%)      | 77 (20%)  |
|         | 4 (Too breathless to leave house or breathless when dressing or undressing)         |                       | 2 (18%)        | 2 (3%)                | 8 (5%)                    | 11 (8%)       | 23 (6%)   |

288

dln73797: /arenv/arprod/ccil8781\_gr33343/asq112989/final/drivers/mmrc\_t001.sas 27JUL2010 20:07

CONFIDENTIAL

ASQ112989

Protocol: ASQ112989  
Population: Run-in

Page 3 of 3

Table 3.24  
Summary of Participant-Completed mMRC Dyspnoea Scale

| Visit                 |                                                                                     | Run-in failure (N=52) | Placebo (N=75) | SAL 50mcg BID (N=152) | FSC 250/50mcg BID (N=139) | Total (N=418) |
|-----------------------|-------------------------------------------------------------------------------------|-----------------------|----------------|-----------------------|---------------------------|---------------|
| Visit 3/PD mMRC Score | n                                                                                   | 73                    | 149            | 136                   | 358                       |               |
|                       | Mean                                                                                | 1.7                   | 1.8            | 1.6                   | 1.7                       |               |
|                       | SD                                                                                  | 0.76                  | 0.94           | 0.81                  | 0.86                      |               |
|                       | Median                                                                              | 2.0                   | 2.0            | 2.0                   | 2.0                       |               |
|                       | Min.                                                                                | 0                     | 0              | 0                     | 0                         |               |
|                       | Max.                                                                                | 3                     | 4              | 4                     | 4                         |               |
|                       | 0 (Not troubled with breathlessness except with strenuous exercise)                 | 0                     | 3 (4%)         | 14 (9%)               | 7 (5%)                    | 24 (7%)       |
|                       | 1 (Troubled by shortness of breath when hurrying on level/walking up slight hill)   | 0                     | 28 (38%)       | 39 (26%)              | 59 (43%)                  | 126 (35%)     |
|                       | 2 (Walks slower than others of same age on level b/c breathlessness)                | 0                     | 32 (44%)       | 58 (39%)              | 53 (39%)                  | 143 (40%)     |
|                       | 3 (Stops to breathe after walking about 100 yards/meters or after few min on level) | 0                     | 10 (14%)       | 37 (25%)              | 15 (11%)                  | 62 (17%)      |
|                       | 4 (Too breathless to leave house or breathless when dressing or undressing)         | 0                     | 0              | 1 (<1%)               | 2 (1%)                    | 3 (<1%)       |

289

dln73797: /arenv/arprod/ccil8781\_gr33343/asq112989/final/drivers/mmrc\_t001.sas 27JUL2010 20:07

CONFIDENTIAL

ASQ112989

Protocol: ASQ112989  
Population: Modified Intent-to-treat

Table 3.25  
Summary of Participant-Completed mMRC Response

|               | Placebo<br>(N=75) | SAL 50mcg<br>BID<br>(N=151) | FSC<br>250/50mcg<br>BID<br>(N=139) | Total<br>(N=365) |
|---------------|-------------------|-----------------------------|------------------------------------|------------------|
| Responder     | 16 (22%)          | 44 (30%)                    | 48 (35%)                           | 108 (30%)        |
| Non-responder | 57 (78%)          | 105 (70%)                   | 88 (65%)                           | 250 (70%)        |

For peer review only

290

CONFIDENTIAL

ASQ112989

A patient-completed mMRC responder is defined as a subject who had a change in score between Visit 2 and Visit 3/PD of 1 unit or more. A patient-completed mMRC non-responder is defined as a subject who had a change of less than 1 unit.

dln73797: /arenv/arprod/ccil8781\_gr33343/asq112989/final/drivers/mmrc\_t002.sas 27JUL2010 20:10

Protocol: ASQ112989  
 Population: Run-in

Page 1 of 3

Table 3.26  
 Summary of Physician-Completed mMRC Dyspnoea Scale

| Visit     |                                                                                     | Run-in failure (N=52) | Placebo (N=75) | SAL 50mcg BID (N=152) | FSC 250/50mcg BID (N=139) | Total (N=418) |           |
|-----------|-------------------------------------------------------------------------------------|-----------------------|----------------|-----------------------|---------------------------|---------------|-----------|
| Screening | mMRC Score                                                                          | n                     | 51             | 75                    | 152                       | 139           | 417       |
|           |                                                                                     | Mean                  | 2.3            | 2.5                   | 2.5                       | 2.4           | 2.4       |
|           |                                                                                     | SD                    | 0.58           | 0.64                  | 0.57                      | 0.51          | 0.57      |
|           |                                                                                     | Median                | 2.0            | 2.0                   | 2.0                       | 2.0           | 2.0       |
|           |                                                                                     | Min.                  | 1              | 2                     | 2                         | 2             | 1         |
|           |                                                                                     | Max.                  | 4              | 4                     | 4                         | 4             | 4         |
|           | 0 (Not troubled with breathlessness except with strenuous exercise)                 |                       | 0              | 0                     | 0                         | 0             | 0         |
|           | 1 (Troubled by shortness of breath when hurrying on level/walking up slight hill)   |                       | 2 (4%)         | 0                     | 0                         | 0             | 2 (<1%)   |
|           | 2 (Walks slower than others of same age on level b/c breathlessness)                |                       | 33 (65%)       | 43 (57%)              | 86 (57%)                  | 78 (56%)      | 240 (58%) |
|           | 3 (Stops to breathe after walking about 100 yards/meters or after few min on level) |                       | 15 (29%)       | 26 (35%)              | 60 (39%)                  | 60 (43%)      | 161 (39%) |
|           | 4 (Too breathless to leave house or breathless when dressing or undressing)         |                       | 1 (2%)         | 6 (8%)                | 6 (4%)                    | 1 (<1%)       | 14 (3%)   |

291

dln73797: /arenv/arprod/ccil8781\_gr33343/asq112989/final/drivers/mmrc\_t003.sas 27JUL2010 20:10

CONFIDENTIAL

ASQ112989

Protocol: ASQ112989  
Population: Run-in

Page 2 of 3

Table 3.26  
Summary of Physician-Completed mMRC Dyspnoea Scale

| Visit   |                                                                                              | Run-in<br>failure<br>(N=52) | Placebo<br>(N=75) | SAL 50mcg<br>BID<br>(N=152) | FSC<br>250/50mcg<br>BID<br>(N=139) | Total<br>(N=418) |           |
|---------|----------------------------------------------------------------------------------------------|-----------------------------|-------------------|-----------------------------|------------------------------------|------------------|-----------|
| Visit 2 | mMRC Score                                                                                   | n                           | 10                | 75                          | 151                                | 139              | 375       |
|         |                                                                                              | Mean                        | 2.2               | 2.3                         | 2.4                                | 2.4              | 2.4       |
|         |                                                                                              | SD                          | 0.92              | 0.62                        | 0.57                               | 0.62             | 0.61      |
|         |                                                                                              | Median                      | 2.0               | 2.0                         | 2.0                                | 2.0              | 2.0       |
|         |                                                                                              | Min.                        | 1                 | 1                           | 1                                  | 0                | 0         |
|         |                                                                                              | Max.                        | 4                 | 4                           | 4                                  | 4                | 4         |
|         | 0 (Not troubled with<br>breathlessness except with<br>strenuous exercise)                    |                             | 0                 | 0                           | 0                                  | 1 (<1%)          | 1 (<1%)   |
|         | 1 (Troubled by shortness<br>of breath when hurrying on<br>level/walking up slight<br>hill)   |                             | 2 (20%)           | 3 (4%)                      | 2 (1%)                             | 5 (4%)           | 12 (3%)   |
|         | 2 (Walks slower than<br>others of same age on<br>level b/c breathlessness)                   |                             | 5 (50%)           | 48 (64%)                    | 92 (61%)                           | 80 (58%)         | 225 (60%) |
|         | 3 (Stops to breathe after<br>walking about 100<br>yards/meters or after few<br>min on level) |                             | 2 (20%)           | 21 (28%)                    | 53 (35%)                           | 50 (36%)         | 126 (34%) |
|         | 4 (Too breathless to leave<br>house or breathless when<br>dressing or undressing)            |                             | 1 (10%)           | 3 (4%)                      | 4 (3%)                             | 3 (2%)           | 11 (3%)   |

dln73797: /arenv/arprod/ccil8781\_gr33343/asq112989/final/drivers/mmrc\_t003.sas 27JUL2010 20:10

CONFIDENTIAL

ASQ112989



Protocol: ASQ112989  
 Population: Run-in

Page 3 of 3

Table 3.26  
 Summary of Physician-Completed mMRC Dyspnoea Scale

| Visit                 |                                                                                     | Run-in failure (N=52) | Placebo (N=75) | SAL 50mcg BID (N=152) | FSC 250/50mcg BID (N=139) | Total (N=418) |
|-----------------------|-------------------------------------------------------------------------------------|-----------------------|----------------|-----------------------|---------------------------|---------------|
| Visit 3/PD mMRC Score | n                                                                                   | 73                    | 149            | 136                   | 358                       |               |
|                       | Mean                                                                                | 2.2                   | 2.2            | 2.0                   | 2.1                       |               |
|                       | SD                                                                                  | 0.79                  | 0.71           | 0.76                  | 0.75                      |               |
|                       | Median                                                                              | 2.0                   | 2.0            | 2.0                   | 2.0                       |               |
|                       | Min.                                                                                | 0                     | 0              | 0                     | 0                         |               |
|                       | Max.                                                                                | 4                     | 4              | 4                     | 4                         |               |
|                       | 0 (Not troubled with breathlessness except with strenuous exercise)                 | 0                     | 1 (1%)         | 1 (<1%)               | 2 (1%)                    | 4 (1%)        |
|                       | 1 (Troubled by shortness of breath when hurrying on level/walking up slight hill)   | 0                     | 12 (16%)       | 23 (15%)              | 32 (24%)                  | 67 (19%)      |
|                       | 2 (Walks slower than others of same age on level b/c breathlessness)                | 0                     | 38 (52%)       | 79 (53%)              | 72 (53%)                  | 189 (53%)     |
|                       | 3 (Stops to breathe after walking about 100 yards/meters or after few min on level) | 0                     | 19 (26%)       | 44 (30%)              | 27 (20%)                  | 90 (25%)      |
|                       | 4 (Too breathless to leave house or breathless when dressing or undressing)         | 0                     | 3 (4%)         | 2 (1%)                | 3 (2%)                    | 8 (2%)        |

293

dln73797: /arenv/arprod/ccil8781\_gr33343/asq112989/final/drivers/mmrc\_t003.sas 27JUL2010 20:10

CONFIDENTIAL

ASQ112989

Protocol: ASQ112989  
Population: Modified Intent-to-treat

Table 3.27  
Summary of Physician-Completed mMRC Response

|               | Placebo<br>(N=75) | SAL 50mcg<br>BID<br>(N=151) | FSC<br>250/50mcg<br>BID<br>(N=139) | Total<br>(N=365) |
|---------------|-------------------|-----------------------------|------------------------------------|------------------|
| Responder     | 17 (23%)          | 42 (28%)                    | 45 (33%)                           | 104 (29%)        |
| Non-responder | 56 (77%)          | 106 (72%)                   | 91 (67%)                           | 253 (71%)        |

For peer review only

1  
2  
3  
4  
5  
6  
7  
8  
9  
10  
11  
12  
13  
14  
15  
16  
17  
18  
19  
20  
21  
22  
23  
24  
25  
26  
27  
28  
29  
30  
31  
32  
33  
34  
35  
36  
37  
38  
39  
40  
41  
42  
43  
44  
45  
46  
47  
48  
49

294

A physician-completed mMRC responder is defined as a subject who had a change in score between Visit 2 and Visit 3/PD of 1 unit or more. A physician-completed mMRC non-responder is defined as a subject who had a change of less than 1 unit.

dln73797: /arenv/arprod/ccil8781\_gr33343/asq112989/final/drivers/mmrc\_t004.sas 27JUL2010 20:10

CONFIDENTIAL

ASQ112989

Protocol: ASQ112989  
 Population: Modified Intent-to-treat

Page 1 of 1

Table 4.01  
 Summary of Exposure to Study Drug

|                     |            | Placebo<br>(N=75) | SAL 50mcg BID<br>(N=151) | FSC 250/50mcg<br>BID<br>(N=139) |
|---------------------|------------|-------------------|--------------------------|---------------------------------|
| Exposure (Days) [1] | n          | 75                | 151                      | 139                             |
|                     | Mean       | 40.0              | 40.5                     | 39.7                            |
|                     | SD         | 8.18              | 6.04                     | 7.75                            |
|                     | Median     | 42.0              | 42.0                     | 42.0                            |
|                     | Min.       | 1                 | 3                        | 1                               |
|                     | Max.       | 55                | 47                       | 52                              |
| Range of Exposure   | <=7 days   | 2 (3%)            | 1 (<1%)                  | 3 (2%)                          |
|                     | 8-14 days  | 1 (1%)            | 2 (1%)                   | 2 (1%)                          |
|                     | 15-28 days | 2 (3%)            | 6 (4%)                   | 5 (4%)                          |
|                     | 29-42 days | 61 (81%)          | 110 (73%)                | 101 (73%)                       |
|                     | >42 days   | 9 (12%)           | 32 (21%)                 | 28 (20%)                        |

[1] Calculated as ((date of last dose - date of first dose) + 1)  
 dln73797: /arenv/arprod/ccil8781\_gr33343/asq112989/final/drivers/ex\_t001.sas 27JUL2010 20:13

295

CONFIDENTIAL

ASQ112989

Protocol: ASQ112989  
Population: Modified Intent-to-treat

Page 1 of 1

Table 4.02  
On-Treatment Adverse Event Overview

|                                                               | Placebo<br>(N=75) |       | SAL 50mcg<br>BID<br>(N=151) |       | FSC<br>250/50mcg<br>BID<br>(N=139) |       |
|---------------------------------------------------------------|-------------------|-------|-----------------------------|-------|------------------------------------|-------|
| Any AE                                                        | 14                | (19%) | 34                          | (23%) | 37                                 | (27%) |
| AE related to study treatment                                 | 3                 | (4%)  | 9                           | (6%)  | 4                                  | (3%)  |
| AE leading to permanent<br>discontinuation of study treatment | 3                 | (4%)  | 3                           | (2%)  | 7                                  | (5%)  |
| AE leading to dose reduction                                  | 0                 |       | 0                           |       | 0                                  |       |
| AE leading to dose interruption/delay                         | 1                 | (1%)  | 3                           | (2%)  | 0                                  |       |
| Any SAE                                                       | 4                 | (5%)  | 5                           | (3%)  | 3                                  | (2%)  |
| SAE related to study treatment                                | 2                 | (3%)  | 1                           | (<1%) | 0                                  |       |
| Fatal SAE                                                     | 0                 |       | 0                           |       | 1                                  | (<1%) |
| Fatal SAE related to study treatment                          | 0                 |       | 0                           |       | 0                                  |       |

296

dln73797: /arenv/arprod/ccil8781\_gr33343/asq112989/final/drivers/ae\_t009\_over.sas 27JUL2010 20:14

Protocol: ASQ112989  
Population: Modified Intent-to-treat

Page 1 of 5

Table 4.03  
Summary of On-Treatment Adverse Events

| System Organ Class<br>Preferred Term            | Placebo<br>(N=75) | SAL 50mcg<br>BID<br>(N=151) | FSC<br>250/50mcg<br>BID<br>(N=139) |
|-------------------------------------------------|-------------------|-----------------------------|------------------------------------|
| ANY EVENT                                       | 14 (19%)          | 34 (23%)                    | 37 (27%)                           |
| Respiratory, thoracic and mediastinal disorders |                   |                             |                                    |
| Any event                                       | 7 (9%)            | 14 (9%)                     | 7 (5%)                             |
| Chronic obstructive pulmonary disease           | 4 (5%)            | 3 (2%)                      | 0                                  |
| Dyspnoea                                        | 2 (3%)            | 4 (3%)                      | 1 (<1%)                            |
| Cough                                           | 0                 | 3 (2%)                      | 2 (1%)                             |
| Oropharyngeal pain                              | 0                 | 3 (2%)                      | 0                                  |
| Sinus congestion                                | 0                 | 1 (<1%)                     | 2 (1%)                             |
| Respiratory tract congestion                    | 0                 | 2 (1%)                      | 0                                  |
| Acute respiratory failure                       | 0                 | 1 (<1%)                     | 0                                  |
| Dysphonia                                       | 0                 | 0                           | 1 (<1%)                            |
| Epistaxis                                       | 1 (1%)            | 0                           | 0                                  |
| Nasal congestion                                | 0                 | 1 (<1%)                     | 0                                  |
| Pneumothorax                                    | 0                 | 1 (<1%)                     | 0                                  |
| Respiratory failure                             | 0                 | 0                           | 1 (<1%)                            |
| Rhinitis allergic                               | 0                 | 0                           | 1 (<1%)                            |
| Rhinorrhoea                                     | 1 (1%)            | 0                           | 0                                  |
| Infections and infestations                     |                   |                             |                                    |
| Any event                                       | 4 (5%)            | 9 (6%)                      | 10 (7%)                            |
| Candidiasis                                     | 1 (1%)            | 0                           | 3 (2%)                             |
| Nasopharyngitis                                 | 1 (1%)            | 2 (1%)                      | 1 (<1%)                            |
| Bronchitis                                      | 0                 | 1 (<1%)                     | 1 (<1%)                            |
| Gastroenteritis viral                           | 0                 | 1 (<1%)                     | 1 (<1%)                            |
| Influenza                                       | 0                 | 1 (<1%)                     | 1 (<1%)                            |
| Pneumonia                                       | 0                 | 2 (1%)                      | 0                                  |
| Respiratory tract infection                     | 2 (3%)            | 0                           | 0                                  |
| Acute sinusitis                                 | 0                 | 0                           | 1 (<1%)                            |
| Gastric infection                               | 1 (1%)            | 0                           | 0                                  |

dln73797: /arenv/arprod/ccil8781\_gr33343/asq112989/final/drivers/ae\_t001\_on.sas 27JUL2010 20:30

CONFIDENTIAL

ASQ112989

Protocol: ASQ112989  
Population: Modified Intent-to-treat

Page 2 of 5

Table 4.03  
Summary of On-Treatment Adverse Events

| System Organ Class<br>Preferred Term    | Placebo<br>(N=75) | SAL 50mcg<br>BID<br>(N=151) | FSC<br>250/50mcg<br>BID<br>(N=139) |
|-----------------------------------------|-------------------|-----------------------------|------------------------------------|
| Pharyngitis                             | 0                 | 0                           | 1 (<1%)                            |
| Pneumonia klebsiella                    | 0                 | 1 (<1%)                     | 0                                  |
| Sinusitis                               | 0                 | 0                           | 1 (<1%)                            |
| Tracheobronchitis                       | 0                 | 1 (<1%)                     | 0                                  |
| Upper respiratory tract infection       | 0                 | 0                           | 1 (<1%)                            |
| Viral upper respiratory tract infection | 0                 | 1 (<1%)                     | 0                                  |
| <b>Nervous system disorders</b>         |                   |                             |                                    |
| Any event                               | 3 (4%)            | 8 (5%)                      | 8 (6%)                             |
| Headache                                | 2 (3%)            | 6 (4%)                      | 5 (4%)                             |
| Sinus headache                          | 0                 | 0                           | 3 (2%)                             |
| Carpal tunnel syndrome                  | 0                 | 1 (<1%)                     | 0                                  |
| Cerebrovascular accident                | 0                 | 1 (<1%)                     | 0                                  |
| Dizziness                               | 1 (1%)            | 0                           | 0                                  |
| Sciatica                                | 0                 | 0                           | 1 (<1%)                            |
| Syncope                                 | 1 (1%)            | 0                           | 0                                  |
| <b>Gastrointestinal disorders</b>       |                   |                             |                                    |
| Any event                               | 1 (1%)            | 8 (5%)                      | 5 (4%)                             |
| Nausea                                  | 1 (1%)            | 2 (1%)                      | 1 (<1%)                            |
| Vomiting                                | 0                 | 2 (1%)                      | 1 (<1%)                            |
| Diarrhoea                               | 0                 | 1 (<1%)                     | 1 (<1%)                            |
| Dyspepsia                               | 0                 | 1 (<1%)                     | 1 (<1%)                            |
| Abdominal discomfort                    | 1 (1%)            | 0                           | 0                                  |
| Constipation                            | 0                 | 1 (<1%)                     | 0                                  |
| Dry mouth                               | 0                 | 1 (<1%)                     | 0                                  |
| Impaired gastric emptying               | 0                 | 1 (<1%)                     | 0                                  |
| Lip swelling                            | 0                 | 1 (<1%)                     | 0                                  |
| Melaena                                 | 0                 | 0                           | 1 (<1%)                            |
| Stomatitis                              | 0                 | 0                           | 1 (<1%)                            |

dln73797: /arenv/arprod/ccil8781\_gr33343/asq112989/final/drivers/ae\_t001\_on.sas 27JUL2010 20:30

CONFIDENTIAL

ASQ112989

Protocol: ASQ112989  
 Population: Modified Intent-to-treat

Page 3 of 5

Table 4.03  
 Summary of On-Treatment Adverse Events

| System Organ Class Preferred Term                    | Placebo (N=75) | SAL 50mcg BID (N=151) | FSC 250/50mcg BID (N=139) |
|------------------------------------------------------|----------------|-----------------------|---------------------------|
| Toothache                                            | 0              | 1 (<1%)               | 0                         |
| Musculoskeletal and connective tissue disorders      |                |                       |                           |
| Any event                                            | 2 (3%)         | 6 (4%)                | 6 (4%)                    |
| Myalgia                                              | 1 (1%)         | 1 (<1%)               | 1 (<1%)                   |
| Arthralgia                                           | 0              | 0                     | 2 (1%)                    |
| Pain in extremity                                    | 0              | 0                     | 2 (1%)                    |
| Back pain                                            | 0              | 0                     | 1 (<1%)                   |
| Fibromyalgia                                         | 0              | 1 (<1%)               | 0                         |
| Joint swelling                                       | 0              | 1 (<1%)               | 0                         |
| Lower extremity mass                                 | 0              | 1 (<1%)               | 0                         |
| Muscle spasms                                        | 0              | 0                     | 1 (<1%)                   |
| Musculoskeletal chest pain                           | 0              | 1 (<1%)               | 0                         |
| Musculoskeletal pain                                 | 1 (1%)         | 0                     | 0                         |
| Osteoarthritis                                       | 0              | 1 (<1%)               | 0                         |
| General disorders and administration site conditions |                |                       |                           |
| Any event                                            | 3 (4%)         | 5 (3%)                | 1 (<1%)                   |
| Chest pain                                           | 1 (1%)         | 3 (2%)                | 0                         |
| Adverse drug reaction                                | 0              | 1 (<1%)               | 0                         |
| Fatigue                                              | 1 (1%)         | 0                     | 0                         |
| Irritability                                         | 0              | 0                     | 1 (<1%)                   |
| Oedema peripheral                                    | 1 (1%)         | 0                     | 0                         |
| Pain                                                 | 0              | 1 (<1%)               | 0                         |
| Injury, poisoning and procedural complications       |                |                       |                           |
| Any event                                            | 0              | 4 (3%)                | 3 (2%)                    |
| Hand fracture                                        | 0              | 1 (<1%)               | 1 (<1%)                   |

dln73797: /arenv/arprod/ccil8781\_gr33343/asq112989/final/drivers/ae\_t001\_on.sas 27JUL2010 20:30

299

CONFIDENTIAL

ASQ112989

Protocol: ASQ112989  
 Population: Modified Intent-to-treat

Page 4 of 5

Table 4.03  
 Summary of On-Treatment Adverse Events

| System Organ Class<br>Preferred Term                                   | Placebo<br>(N=75) | SAL 50mcg<br>BID<br>(N=151) | FSC<br>250/50mcg<br>BID<br>(N=139) |
|------------------------------------------------------------------------|-------------------|-----------------------------|------------------------------------|
| Ankle fracture                                                         | 0                 | 0                           | 1 (<1%)                            |
| Epicondylitis                                                          | 0                 | 1 (<1%)                     | 0                                  |
| Injury                                                                 | 0                 | 1 (<1%)                     | 0                                  |
| Joint sprain                                                           | 0                 | 1 (<1%)                     | 0                                  |
| Muscle strain                                                          | 0                 | 0                           | 1 (<1%)                            |
| Metabolism and nutrition disorders                                     |                   |                             |                                    |
| Any event                                                              | 1 (1%)            | 4 (3%)                      | 1 (<1%)                            |
| Hyperglycaemia                                                         | 1 (1%)            | 1 (<1%)                     | 0                                  |
| Hyperlipidaemia                                                        | 0                 | 2 (1%)                      | 0                                  |
| Dehydration                                                            | 0                 | 1 (<1%)                     | 0                                  |
| Diabetes mellitus inadequate control                                   | 0                 | 1 (<1%)                     | 0                                  |
| Gout                                                                   | 0                 | 0                           | 1 (<1%)                            |
| Hypokalaemia                                                           | 0                 | 1 (<1%)                     | 0                                  |
| Psychiatric disorders                                                  |                   |                             |                                    |
| Any event                                                              | 2 (3%)            | 2 (1%)                      | 1 (<1%)                            |
| Anxiety                                                                | 1 (1%)            | 2 (1%)                      | 0                                  |
| Insomnia                                                               | 1 (1%)            | 1 (<1%)                     | 0                                  |
| Depression                                                             | 0                 | 1 (<1%)                     | 0                                  |
| Nervousness                                                            | 1 (1%)            | 0                           | 0                                  |
| Suicide attempt                                                        | 0                 | 0                           | 1 (<1%)                            |
| Investigations                                                         |                   |                             |                                    |
| Any event                                                              | 1 (1%)            | 1 (<1%)                     | 1 (<1%)                            |
| Blood pressure increased                                               | 1 (1%)            | 0                           | 1 (<1%)                            |
| Heart rate increased                                                   | 0                 | 1 (<1%)                     | 0                                  |
| Neoplasms benign, malignant and<br>unspecified (incl cysts and polyps) |                   |                             |                                    |
| Any event                                                              | 0                 | 1 (<1%)                     | 1 (<1%)                            |

dln73797: /arenv/arprod/ccil8781\_gr33343/asq112989/final/drivers/ae\_t001\_on.sas 27JUL2010 20:30

CONFIDENTIAL

ASQ112989



Protocol: ASQ112989  
 Population: Modified Intent-to-treat

Page 5 of 5

Table 4.03  
 Summary of On-Treatment Adverse Events

| System Organ Class<br>Preferred Term   | Placebo<br>(N=75) | SAL 50mcg<br>BID<br>(N=151) | FSC<br>250/50mcg<br>BID<br>(N=139) |
|----------------------------------------|-------------------|-----------------------------|------------------------------------|
| Lung neoplasm malignant                | 0                 | 0                           | 1 (<1%)                            |
| Seborrheic keratosis                   | 0                 | 1 (<1%)                     | 0                                  |
| Skin and subcutaneous tissue disorders |                   |                             |                                    |
| Any event                              | 1 (1%)            | 0                           | 1 (<1%)                            |
| Periorbital oedema                     | 1 (1%)            | 0                           | 0                                  |
| Skin lesion                            | 0                 | 0                           | 1 (<1%)                            |
| Blood and lymphatic system disorders   |                   |                             |                                    |
| Any event                              | 1 (1%)            | 0                           | 0                                  |
| Leukocytosis                           | 1 (1%)            | 0                           | 0                                  |
| Cardiac disorders                      |                   |                             |                                    |
| Any event                              | 0                 | 0                           | 1 (<1%)                            |
| Myocardial infarction                  | 0                 | 0                           | 1 (<1%)                            |
| Ear and labyrinth disorders            |                   |                             |                                    |
| Any event                              | 0                 | 0                           | 1 (<1%)                            |
| Ear pain                               | 0                 | 0                           | 1 (<1%)                            |
| Eye disorders                          |                   |                             |                                    |
| Any event                              | 0                 | 0                           | 1 (<1%)                            |
| Vision blurred                         | 0                 | 0                           | 1 (<1%)                            |
| Immune system disorders                |                   |                             |                                    |
| Any event                              | 0                 | 0                           | 1 (<1%)                            |
| Multiple allergies                     | 0                 | 0                           | 1 (<1%)                            |
| Vascular disorders                     |                   |                             |                                    |
| Any event                              | 0                 | 0                           | 1 (<1%)                            |
| Hypertension                           | 0                 | 0                           | 1 (<1%)                            |

dln73797: /arenv/arprod/ccil8781\_gr33343/asq112989/final/drivers/ae\_t001\_on.sas 27JUL2010 20:30

301

CONFIDENTIAL

ASQ112989

Protocol: ASQ112989  
 Population: Modified Intent-to-treat

Page 1 of 2

Table 4.04  
 Summary of Post-Treatment Adverse Events

| System Organ Class<br>Preferred Term                 | Placebo<br>(N=75) | SAL 50mcg<br>BID<br>(N=151) | FSC<br>250/50mcg<br>BID<br>(N=139) |
|------------------------------------------------------|-------------------|-----------------------------|------------------------------------|
| ANY EVENT                                            | 4 (5%)            | 4 (3%)                      | 7 (5%)                             |
| Infections and infestations                          |                   |                             |                                    |
| Any event                                            | 2 (3%)            | 1 (<1%)                     | 1 (<1%)                            |
| Bronchitis                                           | 1 (1%)            | 1 (<1%)                     | 0                                  |
| Gastroenteritis viral                                | 1 (1%)            | 0                           | 0                                  |
| Nasopharyngitis                                      | 0                 | 0                           | 1 (<1%)                            |
| Respiratory, thoracic and mediastinal disorders      |                   |                             |                                    |
| Any event                                            | 1 (1%)            | 1 (<1%)                     | 2 (1%)                             |
| Cough                                                | 0                 | 1 (<1%)                     | 0                                  |
| Dyspnoea                                             | 0                 | 0                           | 1 (<1%)                            |
| Epistaxis                                            | 0                 | 0                           | 1 (<1%)                            |
| Productive cough                                     | 0                 | 1 (<1%)                     | 0                                  |
| Respiratory tract congestion                         | 1 (1%)            | 0                           | 0                                  |
| Gastrointestinal disorders                           |                   |                             |                                    |
| Any event                                            | 0                 | 1 (<1%)                     | 2 (1%)                             |
| Gastric ulcer                                        | 0                 | 0                           | 1 (<1%)                            |
| Gastrooesophageal reflux disease                     | 0                 | 0                           | 1 (<1%)                            |
| Toothache                                            | 0                 | 1 (<1%)                     | 0                                  |
| Musculoskeletal and connective tissue disorders      |                   |                             |                                    |
| Any event                                            | 0                 | 1 (<1%)                     | 1 (<1%)                            |
| Fibromyalgia                                         | 0                 | 0                           | 1 (<1%)                            |
| Pain in extremity                                    | 0                 | 1 (<1%)                     | 0                                  |
| General disorders and administration site conditions |                   |                             |                                    |

dln73797: /arenv/arprod/ccil8781\_gr33343/asq112989/final/drivers/ae\_t002\_post.sas 27JUL2010 20:13

CONFIDENTIAL

ASQ112989

Protocol: ASQ112989  
 Population: Modified Intent-to-treat

Page 2 of 2

Table 4.04  
 Summary of Post-Treatment Adverse Events

| System Organ Class<br>Preferred Term           | Placebo<br>(N=75) | SAL 50mcg<br>BID<br>(N=151) | FSC<br>250/50mcg<br>BID<br>(N=139) |
|------------------------------------------------|-------------------|-----------------------------|------------------------------------|
| Any event                                      | 0                 | 1 (<1%)                     | 0                                  |
| Oedema peripheral                              | 0                 | 1 (<1%)                     | 0                                  |
| Injury, poisoning and procedural complications |                   |                             |                                    |
| Any event                                      | 0                 | 0                           | 1 (<1%)                            |
| Wrist fracture                                 | 0                 | 0                           | 1 (<1%)                            |
| Nervous system disorders                       |                   |                             |                                    |
| Any event                                      | 0                 | 1 (<1%)                     | 0                                  |
| Hypoaesthesia                                  | 0                 | 1 (<1%)                     | 0                                  |
| Skin and subcutaneous tissue disorders         |                   |                             |                                    |
| Any event                                      | 1 (1%)            | 0                           | 0                                  |
| Rash                                           | 1 (1%)            | 0                           | 0                                  |
| Urticaria                                      | 1 (1%)            | 0                           | 0                                  |

303

CONFIDENTIAL

ASQ112989

dln73797: /arenv/arprod/ccil8781\_gr33343/asq112989/final/drivers/ae\_t002\_post.sas 27JUL2010 20:13

Protocol: ASQ112989  
Population: All Subjects Enrolled

Table 4.05  
Summary of Serious Adverse Events for Subjects Who did not Receive Randomised Treatment

| System Organ Class<br>Preferred Term            | Total<br>(N=547) |
|-------------------------------------------------|------------------|
| ANY EVENT                                       | 2 (1%)           |
| Infections and infestations                     |                  |
| Any event                                       | 1 (<1%)          |
| Pneumonia                                       | 1 (<1%)          |
| Respiratory, thoracic and mediastinal disorders |                  |
| Any event                                       | 1 (<1%)          |
| Chronic obstructive pulmonary disease           | 1 (<1%)          |

304

CONFIDENTIAL

ASQ112989

dln73797: /arenv/arprod/ccil8781\_gr33343/asq112989/final/drivers/ae\_t005\_snorand.sas 27JUL2010 20:11

1  
2  
3  
4  
5  
6  
7  
8  
9  
10  
11  
12  
13  
14  
15  
16  
17  
18  
19  
20  
21  
22  
23  
24  
25  
26  
27  
28  
29  
30  
31  
32  
33  
34  
35  
36  
37  
38  
39  
40  
41  
42  
43  
44  
45  
46  
47  
48  
49

Protocol: ASQ112989  
Population: Modified Intent-to-treat

Page 1 of 1

Table 4.06  
Summary of Pre-Treatment Serious Adverse Events

No data to report

For peer review only

305

CONFIDENTIAL

ASQ112989

dln73797: /arenv/arprod/ccil8781\_gr33343/asq112989/final/drivers/ae\_t008\_spre.sas 27JUL2010 20:08

Protocol: ASQ112989  
 Population: Modified Intent-to-treat

Page 1 of 2

Table 4.07  
 Summary of On-Treatment Serious Adverse Events

| System Organ Class<br>Preferred Term                 | Placebo<br>(N=75) | SAL 50mcg<br>BID<br>(N=151) | FSC<br>250/50mcg<br>BID<br>(N=139) |
|------------------------------------------------------|-------------------|-----------------------------|------------------------------------|
| ANY EVENT                                            | 4 (5%)            | 5 (3%)                      | 3 (2%)                             |
| Respiratory, thoracic and mediastinal disorders      |                   |                             |                                    |
| Any event                                            | 4 (5%)            | 4 (3%)                      | 1 (<1%)                            |
| Chronic obstructive pulmonary disease                | 4 (5%)            | 2 (1%)                      | 0                                  |
| Acute respiratory failure                            | 0                 | 1 (<1%)                     | 0                                  |
| Pneumothorax                                         | 0                 | 1 (<1%)                     | 0                                  |
| Respiratory failure                                  | 0                 | 0                           | 1 (<1%)                            |
| Cardiac disorders                                    |                   |                             |                                    |
| Any event                                            | 0                 | 0                           | 1 (<1%)                            |
| Myocardial infarction                                | 0                 | 0                           | 1 (<1%)                            |
| Gastrointestinal disorders                           |                   |                             |                                    |
| Any event                                            | 0                 | 1 (<1%)                     | 0                                  |
| Impaired gastric emptying                            | 0                 | 1 (<1%)                     | 0                                  |
| General disorders and administration site conditions |                   |                             |                                    |
| Any event                                            | 0                 | 1 (<1%)                     | 0                                  |
| Chest pain                                           | 0                 | 1 (<1%)                     | 0                                  |
| Infections and infestations                          |                   |                             |                                    |
| Any event                                            | 0                 | 1 (<1%)                     | 0                                  |
| Pneumonia                                            | 0                 | 1 (<1%)                     | 0                                  |
| Metabolism and nutrition disorders                   |                   |                             |                                    |
| Any event                                            | 0                 | 1 (<1%)                     | 0                                  |
| Dehydration                                          | 0                 | 1 (<1%)                     | 0                                  |
| Diabetes mellitus inadequate control                 | 0                 | 1 (<1%)                     | 0                                  |

dln73797: /arenv/arprod/ccil8781\_gr33343/asq112989/final/drivers/ae\_t006\_ser.sas 27JUL2010 20:10

CONFIDENTIAL

ASQ112989

Protocol: ASQ112989  
 Population: Modified Intent-to-treat

Page 2 of 2

Table 4.07  
 Summary of On-Treatment Serious Adverse Events

| System Organ Class<br>Preferred Term | Placebo<br>(N=75) | SAL 50mcg<br>BID<br>(N=151) | FSC<br>250/50mcg<br>BID<br>(N=139) |
|--------------------------------------|-------------------|-----------------------------|------------------------------------|
| Nervous system disorders             |                   |                             |                                    |
| Any event                            | 0                 | 1 (<1%)                     | 0                                  |
| Cerebrovascular accident             | 0                 | 1 (<1%)                     | 0                                  |
| Psychiatric disorders                |                   |                             |                                    |
| Any event                            | 0                 | 0                           | 1 (<1%)                            |
| Suicide attempt                      | 0                 | 0                           | 1 (<1%)                            |

307

CONFIDENTIAL

ASQ112989

dln73797: /arenv/arprod/ccil8781\_gr33343/asq112989/final/drivers/ae\_t006\_ser.sas 27JUL2010 20:10

Protocol: ASQ112989  
Population: Modified Intent-to-treat

Table 4.08  
Summary of Post-Treatment Serious Adverse Events

No data to report

For peer review only

1  
2  
3  
4  
5  
6  
7  
8  
9  
10  
11  
12  
13  
14  
15  
16  
17  
18  
19  
20  
21  
22  
23  
24  
25  
26  
27  
28  
29  
30  
31  
32  
33  
34  
35  
36  
37  
38  
39  
40  
41  
42  
43  
44  
45  
46  
47  
48  
49

308

dln73797: /arenv/arprod/ccil8781\_gr33343/asq112989/final/drivers/ae\_t007\_spst.sas 27JUL2010 20:08

CONFIDENTIAL

ASQ112989



Protocol: ASQ112989  
 Population: Modified Intent-to-treat

Page 1 of 2

Table 4.09  
 Summary of Drug-Related On-Treatment Adverse Events

| System Organ Class<br>Preferred Term                 | Placebo<br>(N=75) | SAL 50mcg<br>BID<br>(N=151) | FSC<br>250/50mcg<br>BID<br>(N=139) |
|------------------------------------------------------|-------------------|-----------------------------|------------------------------------|
| ANY EVENT                                            | 3 (4%)            | 9 (6%)                      | 4 (3%)                             |
| Respiratory, thoracic and mediastinal disorders      |                   |                             |                                    |
| Any event                                            | 3 (4%)            | 5 (3%)                      | 1 (<1%)                            |
| Dyspnoea                                             | 1 (1%)            | 4 (3%)                      | 0                                  |
| Chronic obstructive pulmonary disease                | 2 (3%)            | 0                           | 0                                  |
| Cough                                                | 0                 | 1 (<1%)                     | 0                                  |
| Dysphonia                                            | 0                 | 0                           | 1 (<1%)                            |
| Respiratory tract congestion                         | 0                 | 1 (<1%)                     | 0                                  |
| Gastrointestinal disorders                           |                   |                             |                                    |
| Any event                                            | 0                 | 3 (2%)                      | 0                                  |
| Dry mouth                                            | 0                 | 1 (<1%)                     | 0                                  |
| Lip swelling                                         | 0                 | 1 (<1%)                     | 0                                  |
| Toothache                                            | 0                 | 1 (<1%)                     | 0                                  |
| General disorders and administration site conditions |                   |                             |                                    |
| Any event                                            | 0                 | 1 (<1%)                     | 1 (<1%)                            |
| Chest pain                                           | 0                 | 1 (<1%)                     | 0                                  |
| Irritability                                         | 0                 | 0                           | 1 (<1%)                            |
| Infections and infestations                          |                   |                             |                                    |
| Any event                                            | 0                 | 0                           | 2 (1%)                             |
| Candidiasis                                          | 0                 | 0                           | 2 (1%)                             |
| Nervous system disorders                             |                   |                             |                                    |
| Any event                                            | 0                 | 2 (1%)                      | 0                                  |
| Cerebrovascular accident                             | 0                 | 1 (<1%)                     | 0                                  |
| Headache                                             | 0                 | 1 (<1%)                     | 0                                  |

dln73797: /arenv/arprod/ccil8781\_gr33343/asq112989/final/drivers/ae\_t003\_rel.sas 27JUL2010 20:08

309

CONFIDENTIAL

ASQ112989

Protocol: ASQ112989  
Population: Modified Intent-to-treat

Table 4.09  
Summary of Drug-Related On-Treatment Adverse Events

| System Organ Class<br>Preferred Term | Placebo<br>(N=75) | SAL 50mcg<br>BID<br>(N=151) | FSC<br>250/50mcg<br>BID<br>(N=139) |
|--------------------------------------|-------------------|-----------------------------|------------------------------------|
| Investigations                       |                   |                             |                                    |
| Any event                            | 0                 | 1 (<1%)                     | 0                                  |
| Heart rate increased                 | 0                 | 1 (<1%)                     | 0                                  |

1  
2  
3  
4  
5  
6  
7  
8  
9  
10  
11  
12  
13  
14  
15  
16  
17  
18  
19  
20  
21  
22  
23  
24  
25  
26  
27  
28  
29  
30  
31  
32  
33  
34  
35  
36  
37  
38  
39  
40  
41  
42  
43  
44  
45  
46  
47  
48  
49

310

For peer review only

CONFIDENTIAL

ASQ112989

dln73797: /arenv/arprod/ccil8781\_gr33343/asq112989/final/drivers/ae\_t003\_rel.sas 27JUL2010 20:08

Protocol: ASQ112989  
 Population: Modified Intent-to-treat

Page 1 of 2

Table 4.10  
 Summary of On-Treatment Adverse Events Leading to Permanent Discontinuation of Investigational Product and/or Withdrawal from Study

| System Organ Class Preferred Term                                   | Placebo (N=75) | SAL 50mcg BID (N=151) | FSC 250/50mcg BID (N=139) |
|---------------------------------------------------------------------|----------------|-----------------------|---------------------------|
| ANY EVENT                                                           | 3 (4%)         | 3 (2%)                | 7 (5%)                    |
| Respiratory, thoracic and mediastinal disorders                     |                |                       |                           |
| Any event                                                           | 2 (3%)         | 2 (1%)                | 2 (1%)                    |
| Dyspnoea                                                            | 0              | 2 (1%)                | 1 (<1%)                   |
| Chronic obstructive pulmonary disease                               | 2 (3%)         | 0                     | 0                         |
| Respiratory failure                                                 | 0              | 0                     | 1 (<1%)                   |
| Respiratory tract congestion                                        | 0              | 1 (<1%)               | 0                         |
| Infections and infestations                                         |                |                       |                           |
| Any event                                                           | 1 (1%)         | 0                     | 3 (2%)                    |
| Acute sinusitis                                                     | 0              | 0                     | 1 (<1%)                   |
| Candidiasis                                                         | 0              | 0                     | 1 (<1%)                   |
| Pharyngitis                                                         | 0              | 0                     | 1 (<1%)                   |
| Respiratory tract infection                                         | 1 (1%)         | 0                     | 0                         |
| Gastrointestinal disorders                                          |                |                       |                           |
| Any event                                                           | 0              | 1 (<1%)               | 0                         |
| Lip swelling                                                        | 0              | 1 (<1%)               | 0                         |
| General disorders and administration site conditions                |                |                       |                           |
| Any event                                                           | 0              | 0                     | 1 (<1%)                   |
| Irritability                                                        | 0              | 0                     | 1 (<1%)                   |
| Neoplasms benign, malignant and unspecified (incl cysts and polyps) |                |                       |                           |
| Any event                                                           | 0              | 0                     | 1 (<1%)                   |
| Lung neoplasm malignant                                             | 0              | 0                     | 1 (<1%)                   |

dln73797: /arenv/arprod/ccil8781\_gr33343/asq112989/final/drivers/ae\_t004\_wd.sas 27JUL2010 20:08

311

CONFIDENTIAL

ASQ112989

Protocol: ASQ112989  
Population: Modified Intent-to-treat

Table 4.10  
Summary of On-Treatment Adverse Events Leading to Permanent Discontinuation of Investigational Product and/or Withdrawal from Study

| System Organ Class<br>Preferred Term | Placebo<br>(N=75) | SAL 50mcg<br>BID<br>(N=151) | FSC<br>250/50mcg<br>BID<br>(N=139) |
|--------------------------------------|-------------------|-----------------------------|------------------------------------|
| Psychiatric disorders                |                   |                             |                                    |
| Any event                            | 0                 | 0                           | 1 (<1%)                            |
| Suicide attempt                      | 0                 | 0                           | 1 (<1%)                            |

1  
2  
3  
4  
5  
6  
7  
8  
9  
10  
11  
12  
13  
14  
15  
16  
17  
18  
19  
20  
21  
22  
23  
24  
25  
26  
27  
28  
29  
30  
31  
32  
33  
34  
35  
36  
37  
38  
39  
40  
41  
42  
43  
44  
45  
46  
47  
48  
49

312

For peer review only

CONFIDENTIAL

ASQ112989

dln73797: /arenv/arprod/ccil8781\_gr33343/asq112989/final/drivers/ae\_t004\_wd.sas 27JUL2010 20:08

Protocol: ASQ112989  
 Population: Modified Intent-to-treat

Page 1 of 3

Table 4.11  
 Summary of Vital Signs

|                  | Treatment         | N   | Visit                               | n   | Mean | SD    | Median | Min. | Max. |
|------------------|-------------------|-----|-------------------------------------|-----|------|-------|--------|------|------|
| Heart rate (bpm) | Placebo           | 75  | Screening                           | 75  | 76.5 | 13.92 | 75.0   | 54   | 115  |
|                  |                   |     | Visit 3/PD                          | 73  | 76.1 | 13.83 | 76.0   | 54   | 142  |
|                  |                   |     | Change from Screening to Visit 3/PD | 73  | -0.4 | 11.61 | 0.0    | -40  | 32   |
|                  | SAL 50mcg BID     | 151 | Screening                           | 151 | 76.7 | 12.10 | 76.0   | 44   | 118  |
|                  |                   |     | Visit 3/PD                          | 149 | 76.4 | 11.04 | 76.0   | 44   | 106  |
|                  |                   |     | Change from Screening to Visit 3/PD | 149 | -0.1 | 9.48  | 0.0    | -26  | 29   |
|                  | FSC 250/50mcg BID | 139 | Screening                           | 139 | 76.1 | 12.54 | 76.0   | 47   | 114  |
|                  |                   |     | Visit 3/PD                          | 136 | 77.4 | 13.15 | 76.5   | 50   | 109  |
|                  |                   |     | Change from Screening to Visit 3/PD | 136 | 1.3  | 9.84  | 0.0    | -23  | 32   |

Note: PD = Premature Discontinuation

dln73797: /arenv/arprod/ccil8781\_gr33343/asq112989/final/drivers/vs\_t001\_summ.sas 27JUL2010 20:08

313

CONFIDENTIAL

ASQ112989

Protocol: ASQ112989  
 Population: Modified Intent-to-treat

Page 2 of 3

Table 4.11  
 Summary of Vital Signs

|                    | Treatment         | N   | Visit                               | n   | Mean  | SD    | Median | Min. | Max. |
|--------------------|-------------------|-----|-------------------------------------|-----|-------|-------|--------|------|------|
| Systolic BP (mmHg) | Placebo           | 75  | Screening                           | 75  | 130.5 | 17.11 | 130.0  | 94   | 176  |
|                    |                   |     | Visit 3/PD                          | 73  | 127.4 | 15.61 | 125.0  | 93   | 162  |
|                    |                   |     | Change from Screening to Visit 3/PD | 73  | -3.3  | 17.24 | -3.0   | -65  | 41   |
|                    | SAL 50mcg BID     | 151 | Screening                           | 151 | 131.5 | 17.58 | 130.0  | 95   | 188  |
|                    |                   |     | Visit 3/PD                          | 149 | 129.3 | 17.04 | 130.0  | 84   | 186  |
|                    |                   |     | Change from Screening to Visit 3/PD | 149 | -2.4  | 16.16 | -1.0   | -75  | 49   |
|                    | FSC 250/50mcg BID | 139 | Screening                           | 139 | 130.3 | 16.27 | 131.0  | 96   | 185  |
|                    |                   |     | Visit 3/PD                          | 136 | 127.0 | 17.51 | 126.0  | 76   | 178  |
|                    |                   |     | Change from Screening to Visit 3/PD | 136 | -3.4  | 16.93 | -2.0   | -63  | 42   |

Note: PD = Premature Discontinuation

dln73797: /arenv/arprod/ccil8781\_gr33343/asq112989/final/drivers/vs\_t001\_summ.sas 27JUL2010 20:08

Protocol: ASQ112989  
 Population: Modified Intent-to-treat

Page 3 of 3

Table 4.11  
 Summary of Vital Signs

| Treatment                   | N   | Visit                               | n   | Mean | SD    | Median | Min. | Max. |
|-----------------------------|-----|-------------------------------------|-----|------|-------|--------|------|------|
| Diastolic BP (mmHg) Placebo | 75  | Screening                           | 75  | 77.3 | 9.35  | 76.0   | 56   | 97   |
|                             |     | Visit 3/PD                          | 73  | 76.5 | 10.18 | 78.0   | 52   | 100  |
|                             |     | Change from Screening to Visit 3/PD | 73  | -0.7 | 9.20  | 0.0    | -26  | 17   |
| SAL 50mcg BID               | 151 | Screening                           | 151 | 78.4 | 11.50 | 78.0   | 50   | 115  |
|                             |     | Visit 3/PD                          | 149 | 77.4 | 9.21  | 79.0   | 54   | 99   |
|                             |     | Change from Screening to Visit 3/PD | 149 | -1.0 | 9.21  | -1.0   | -42  | 34   |
| FSC 250/50mcg BID           | 139 | Screening                           | 139 | 77.9 | 8.82  | 79.0   | 58   | 100  |
|                             |     | Visit 3/PD                          | 136 | 76.6 | 10.58 | 78.0   | 49   | 103  |
|                             |     | Change from Screening to Visit 3/PD | 136 | -1.4 | 8.76  | -1.0   | -24  | 32   |

Note: PD = Premature Discontinuation  
 dln73797: /arenv/arprod/ccil8781\_gr33343/asq112989/final/drivers/vs\_t001\_summ.sas 27JUL2010 20:08

315

CONFIDENTIAL

ASQ112989

Protocol: ASQ112989  
Population: All Subjects Enrolled

Table 4.12  
Summary of ECG Findings at Screening

|                                      | Total<br>(N=547) |
|--------------------------------------|------------------|
| n                                    | 417              |
| Normal                               | 182 (44%)        |
| Abnormal, not clinically significant | 235 (56%)        |
| Abnormal, clinically significant     | 0                |

1  
2  
3  
4  
5  
6  
7  
8  
9  
10  
11  
12  
13  
14  
15  
16  
17  
18  
19  
20  
21  
22  
23  
24  
25  
26  
27  
28  
29  
30  
31  
32  
33  
34  
35  
36  
37  
38  
39  
40  
41  
42  
43  
44  
45  
46  
47  
48  
49

316

For peer review only

tlc19199: /arenv/arprod/ccil8781\_gr33343/asq112989/final/drivers/eg\_t001\_summ.sas 20AUG2010 14:29

CONFIDENTIAL

ASQ112989



Protocol: ASQ112989  
 Population: Modified Intent-to-treat

Page 1 of 1

Table 4.13  
 Summary of On-Treatment COPD Exacerbations

|                                           |                 | Placebo<br>(N=75) | SAL 50mcg<br>BID<br>(N=151) | FSC<br>250/50mcg<br>BID<br>(N=139) | Total<br>(N=365) |
|-------------------------------------------|-----------------|-------------------|-----------------------------|------------------------------------|------------------|
| Number of COPD exacerbations              | n               | 75                | 151                         | 139                                | 365              |
|                                           | 0               | 69 (92%)          | 136 (90%)                   | 135 (97%)                          | 340 (93%)        |
|                                           | 1               | 5 (7%)            | 15 (10%)                    | 4 (3%)                             | 24 (7%)          |
|                                           | >1              | 1 (1%)            | 0                           | 0                                  | 1 (<1%)          |
| Withdrawn due to any exacerbation         |                 | 1 (17%)           | 0                           | 1 (25%)                            | 2 (8%)           |
| Took corticosteroids for any exacerbation |                 | 6 (100%)          | 13 (87%)                    | 2 (50%)                            | 21 (84%)         |
| Took antibiotics for any exacerbation     |                 | 6 (100%)          | 11 (73%)                    | 3 (75%)                            | 20 (80%)         |
| Hospitalized due to any exacerbation      |                 | 4 (67%)           | 4 (27%)                     | 0                                  | 8 (32%)          |
| Worst severity of exacerbation            | n               | 6                 | 15                          | 4                                  | 25               |
|                                           | Moderate        | 2 (33%)           | 12 (80%)                    | 3 (75%)                            | 17 (68%)         |
|                                           | Severe          | 4 (67%)           | 2 (13%)                     | 1 (25%)                            | 7 (28%)          |
|                                           | Moderate/Severe | 0                 | 1 (7%)                      | 0                                  | 1 (4%)           |
| Worst outcome of exacerbation             | n               | 6                 | 15                          | 4                                  | 25               |
|                                           | Resolved        | 6 (100%)          | 12 (80%)                    | 3 (75%)                            | 21 (84%)         |
|                                           | Fatal           | 0                 | 0                           | 0                                  | 0                |
|                                           | Not resolved    | 0                 | 3 (20%)                     | 1 (25%)                            | 4 (16%)          |

317

dln73797: /arenv/arprod/ccil18781\_gr33343/asq112989/final/drivers/exac\_t001\_summ.sas 27JUL2010 20:08

Protocol: ASQ112989  
Population: Run-in

Page 1 of 1

Table 5.01  
Summary of Healthcare Provider Contacts

|                                                              | Run-in<br>failure<br>(N=52) | Placebo<br>(N=75) | SAL 50mcg<br>BID<br>(N=152) | FSC<br>250/50mcg<br>BID<br>(N=139) | Total<br>(N=418) |
|--------------------------------------------------------------|-----------------------------|-------------------|-----------------------------|------------------------------------|------------------|
| Contact with healthcare provider on any day during run-in    | 16 (35%)                    | 18 (24%)          | 46 (30%)                    | 43 (31%)                           | 123 (30%)        |
| Type of contact during run-in:                               |                             |                   |                             |                                    |                  |
| n                                                            | 16                          | 18                | 46                          | 43                                 | 123              |
| Talked on phone with a doctor or nurse                       | 1 (6%)                      | 1 (6%)            | 9 (20%)                     | 7 (16%)                            | 18 (15%)         |
| Clinic visit for regular checkup                             | 8 (50%)                     | 15 (83%)          | 32 (70%)                    | 32 (74%)                           | 87 (71%)         |
| Clinic visit for change in symptoms or treatment             | 6 (38%)                     | 2 (11%)           | 7 (15%)                     | 6 (14%)                            | 21 (17%)         |
| Went to emergency room or urgent care center                 | 1 (6%)                      | 0                 | 2 (4%)                      | 1 (2%)                             | 4 (3%)           |
| Admitted to hospital                                         | 1 (6%)                      | 0                 | 0                           | 0                                  | 1 (<1%)          |
| Contact with healthcare provider on any day during treatment | 0                           | 20 (27%)          | 47 (31%)                    | 33 (24%)                           | 100 (27%)        |
| Type of contact during treatment                             |                             |                   |                             |                                    |                  |
| n                                                            |                             | 20                | 47                          | 33                                 | 100              |
| Talked on phone with a doctor or nurse                       |                             | 3 (15%)           | 4 (9%)                      | 4 (12%)                            | 11 (11%)         |
| Clinic visit for regular checkup                             |                             | 13 (65%)          | 29 (62%)                    | 21 (64%)                           | 63 (63%)         |
| Clinic visit for change in symptoms or treatment             |                             | 7 (35%)           | 14 (30%)                    | 12 (36%)                           | 33 (33%)         |
| Went to emergency room or urgent care center                 |                             | 1 (5%)            | 3 (6%)                      | 0                                  | 4 (4%)           |
| Admitted to hospital                                         |                             | 3 (15%)           | 2 (4%)                      | 0                                  | 5 (5%)           |

Note: Subjects can record more than one type of contact during each period.

tlc19199: /arenv/arprod/ccil8781\_gr33343/asq112989/final/drivers/hc\_t001.sas 18AUG2010 01:43

CONFIDENTIAL

ASQ112989

Protocol: ASQ112989  
 Population: Run-in

Page 1 of 2

Table 5.02  
 Summary of Unscheduled Healthcare Utilisation During the Run-in

|                                        | Total<br>(N=418) |
|----------------------------------------|------------------|
| -----                                  |                  |
| Unscheduled healthcare utilisation     |                  |
| n                                      | 418              |
| Yes                                    | 25 (6%)          |
| No                                     | 393 (94%)        |
| Total number of telephone calls        |                  |
| 0                                      | 414 (>99%)       |
| 1                                      | 4 (<1%)          |
| 2                                      | 0                |
| >2                                     | 0                |
| Total number of home/day visits        |                  |
| 0                                      | 418 (100%)       |
| 1                                      | 0                |
| 2                                      | 0                |
| >2                                     | 0                |
| Total number of home/night visits      |                  |
| 0                                      | 418 (100%)       |
| 1                                      | 0                |
| 2                                      | 0                |
| >2                                     | 0                |
| Total number of office/practice visits |                  |
| 0                                      | 396 (95%)        |
| 1                                      | 20 (5%)          |
| 2                                      | 2 (<1%)          |
| >2                                     | 0                |

Note: Daily healthcare utilisation is recorded by the subject on the eDiary and unscheduled healthcare utilisation is recorded by the site on a worksheet. The data do not always match.  
 akv11639: /arenv/arprod/ccil18781\_gr33343/asq112989/final/drivers/hc\_t003.sas 23AUG2010 20:39

CONFIDENTIAL

ASQ112989

319

For peer review only

Protocol: ASQ112989  
Population: Run-in

Page 2 of 2

Table 5.02  
Summary of Unscheduled Healthcare Utilisation During the Run-in

|                                               | Total<br>(N=418) |
|-----------------------------------------------|------------------|
| -----                                         |                  |
| Total number of urgent care/outpatient visits |                  |
| 0                                             | 418 (100%)       |
| 1                                             | 0                |
| 2                                             | 0                |
| >2                                            | 0                |
| Total number of emergency room visits         |                  |
| 0                                             | 414 (>99%)       |
| 1                                             | 3 (<1%)          |
| 2                                             | 0                |
| >2                                            | 1 (<1%)          |
| Total number of days spent in intensive care  |                  |
| 0                                             | 418 (100%)       |
| 1                                             | 0                |
| 2                                             | 0                |
| >2                                            | 0                |
| Total number of days spent in a general ward  |                  |
| 0                                             | 418 (100%)       |
| 1                                             | 0                |
| 2                                             | 0                |
| >2                                            | 0                |
| Total length of contact (days)                |                  |
| 0-3                                           | 414 (>99%)       |
| >3-7                                          | 1 (<1%)          |
| >7-14                                         | 3 (<1%)          |
| >14                                           | 0                |

Note: Daily healthcare utilisation is recorded by the subject on the eDiary and unscheduled healthcare utilisation is recorded by the site on a worksheet. The data do not always match.

akv11639: /arenv/arprod/ccil8781\_gr33343/asq112989/final/drivers/hc\_t003.sas 23AUG2010 20:39

320

CONFIDENTIAL

ASQ112989

Protocol: ASQ112989  
 Population: Modified Intent-to-treat

Page 1 of 3

Table 5.03  
 Summary of Unscheduled Healthcare Utilisation During Treatment

|                                    | Placebo<br>(N=75) | SAL 50mcg<br>BID<br>(N=151) | FSC<br>250/50mcg<br>BID<br>(N=139) | Total<br>(N=365) |
|------------------------------------|-------------------|-----------------------------|------------------------------------|------------------|
| -----                              |                   |                             |                                    |                  |
| Unscheduled healthcare utilisation |                   |                             |                                    |                  |
| n                                  | 75                | 151                         | 139                                | 365              |
| Yes                                | 11 (15%)          | 19 (13%)                    | 17 (12%)                           | 47 (13%)         |
| No                                 | 64 (85%)          | 132 (87%)                   | 122 (88%)                          | 318 (87%)        |
| Total number of telephone calls    |                   |                             |                                    |                  |
| 0                                  | 70 (93%)          | 147 (97%)                   | 135 (97%)                          | 352 (96%)        |
| 1                                  | 3 (4%)            | 3 (2%)                      | 3 (2%)                             | 9 (2%)           |
| 2                                  | 1 (1%)            | 0                           | 1 (<1%)                            | 2 (<1%)          |
| >2                                 | 1 (1%)            | 1 (<1%)                     | 0                                  | 2 (<1%)          |
| Total number of home/day visits    |                   |                             |                                    |                  |
| 0                                  | 75 (100%)         | 151 (100%)                  | 139 (100%)                         | 365 (100%)       |
| 1                                  | 0                 | 0                           | 0                                  | 0                |
| 2                                  | 0                 | 0                           | 0                                  | 0                |
| >2                                 | 0                 | 0                           | 0                                  | 0                |
| Total number of home/night visits  |                   |                             |                                    |                  |
| 0                                  | 75 (100%)         | 151 (100%)                  | 139 (100%)                         | 365 (100%)       |
| 1                                  | 0                 | 0                           | 0                                  | 0                |
| 2                                  | 0                 | 0                           | 0                                  | 0                |
| >2                                 | 0                 | 0                           | 0                                  | 0                |

Note: Daily healthcare utilisation is recorded by the subject on the eDiary and unscheduled healthcare utilisation is recorded by the site on a worksheet. The data do not always match.  
 akv11639: /arenv/arprod/ccil18781\_gr33343/asq112989/final/drivers/hc\_t004.sas 23AUG2010 20:39

321

For Peer Review Only

Protocol: ASQ112989  
Population: Modified Intent-to-treat

Table 5.03  
Summary of Unscheduled Healthcare Utilisation During Treatment

|                                               | Placebo<br>(N=75) | SAL 50mcg<br>BID<br>(N=151) | FSC<br>250/50mcg<br>BID<br>(N=139) | Total<br>(N=365) |
|-----------------------------------------------|-------------------|-----------------------------|------------------------------------|------------------|
| -----                                         |                   |                             |                                    |                  |
| Total number of office/practice visits        |                   |                             |                                    |                  |
| 0                                             | 67 (89%)          | 135 (89%)                   | 127 (91%)                          | 329 (90%)        |
| 1                                             | 5 (7%)            | 14 (9%)                     | 8 (6%)                             | 27 (7%)          |
| 2                                             | 1 (1%)            | 2 (1%)                      | 3 (2%)                             | 6 (2%)           |
| >2                                            | 2 (3%)            | 0                           | 1 (<1%)                            | 3 (<1%)          |
| Total number of urgent care/outpatient visits |                   |                             |                                    |                  |
| 0                                             | 74 (99%)          | 151 (100%)                  | 136 (98%)                          | 361 (99%)        |
| 1                                             | 1 (1%)            | 0                           | 3 (2%)                             | 4 (1%)           |
| 2                                             | 0                 | 0                           | 0                                  | 0                |
| >2                                            | 0                 | 0                           | 0                                  | 0                |
| Total number of emergency room visits         |                   |                             |                                    |                  |
| 0                                             | 71 (95%)          | 145 (96%)                   | 137 (99%)                          | 353 (97%)        |
| 1                                             | 4 (5%)            | 6 (4%)                      | 2 (1%)                             | 12 (3%)          |
| 2                                             | 0                 | 0                           | 0                                  | 0                |
| >2                                            | 0                 | 0                           | 0                                  | 0                |
| Total number of days spent in intensive care  |                   |                             |                                    |                  |
| 0                                             | 75 (100%)         | 150 (>99%)                  | 139 (100%)                         | 364 (>99%)       |
| 1                                             | 0                 | 1 (<1%)                     | 0                                  | 1 (<1%)          |
| 2                                             | 0                 | 0                           | 0                                  | 0                |
| >2                                            | 0                 | 0                           | 0                                  | 0                |

Note: Daily healthcare utilisation is recorded by the subject on the eDiary and unscheduled healthcare utilisation is recorded by the site on a worksheet. The data do not always match.  
akv11639: /arenv/arprod/ccil18781\_gr33343/asq112989/final/drivers/hc\_t004.sas 23AUG2010 20:39

CONFIDENTIAL

ASQ112989

1  
2  
3  
4  
5  
6  
7  
8  
9  
10  
11  
12  
13  
14  
15  
16  
17  
18  
19  
20  
21  
22  
23  
24  
25  
26  
27  
28  
29  
30  
31  
32  
33  
34  
35  
36  
37  
38  
39  
40  
41  
42  
43  
44  
45  
46  
47  
48  
49

322

Protocol: ASQ112989  
 Population: Modified Intent-to-treat

Page 3 of 3

Table 5.03  
 Summary of Unscheduled Healthcare Utilisation During Treatment

|                                              | Placebo<br>(N=75) | SAL 50mcg<br>BID<br>(N=151) | FSC<br>250/50mcg<br>BID<br>(N=139) | Total<br>(N=365) |
|----------------------------------------------|-------------------|-----------------------------|------------------------------------|------------------|
| -----                                        |                   |                             |                                    |                  |
| Total number of days spent in a general ward |                   |                             |                                    |                  |
| 0                                            | 72 (96%)          | 146 (97%)                   | 138 (>99%)                         | 356 (98%)        |
| 1                                            | 1 (1%)            | 0                           | 0                                  | 1 (<1%)          |
| 2                                            | 0                 | 0                           | 0                                  | 0                |
| >2                                           | 2 (3%)            | 5 (3%)                      | 1 (<1%)                            | 8 (2%)           |
| Total length of contact (days)               |                   |                             |                                    |                  |
| 0-3                                          | 72 (96%)          | 145 (96%)                   | 135 (97%)                          | 352 (96%)        |
| >3-7                                         | 1 (1%)            | 4 (3%)                      | 1 (<1%)                            | 6 (2%)           |
| >7-14                                        | 1 (1%)            | 1 (<1%)                     | 2 (1%)                             | 4 (1%)           |
| >14                                          | 1 (1%)            | 1 (<1%)                     | 1 (<1%)                            | 3 (<1%)          |

Note: Daily healthcare utilisation is recorded by the subject on the eDiary and unscheduled healthcare utilisation is recorded by the site on a worksheet. The data do not always match.  
 akv11639: /arenv/arprod/ccil8781\_gr33343/asq112989/final/drivers/hc\_t004.sas 23AUG2010 20:39

323

For peer review only



ELSEVIER

Available online at [www.sciencedirect.com](http://www.sciencedirect.com)

SciVerse ScienceDirect

journal homepage: [www.elsevier.com/locate/jval](http://www.elsevier.com/locate/jval)

## Development of the Shortness of Breath with Daily Activities Questionnaire (SOBDA)

Kellee Howard, MS, MA<sup>1</sup>, Pamela Berry, MSc<sup>2</sup>, Jennifer Petrillo, PhD<sup>3</sup>, Ingela Wiklund, PhD<sup>4</sup>, Laurie Roberts, MPH<sup>1</sup>, Michael Watkins, PharmD<sup>5</sup>, Courtney Crim, MD<sup>5</sup>, Teresa Wilcox, PhD<sup>1,\*</sup>

<sup>1</sup>United BioSource Corporation, Bethesda, MD, USA; <sup>2</sup>GlaxoSmithKline, Middlesex, UK; <sup>3</sup>Novartis Pharmaceuticals Corporation, Easton Hanover, NJ, USA; <sup>4</sup>Center for Health Outcomes Research, United BioSource Corporation, London, UK; <sup>5</sup>GlaxoSmithKline, Durham, NC, USA

### ABSTRACT

**Objectives:** Based on qualitative research of patients with chronic obstructive pulmonary disease (COPD), the Shortness of Breath (SOB) with Daily Activities (SOBDA) questionnaire was developed as a patient-reported outcome instrument to evaluate the impact of therapy on SOB and assess how SOB affects daily activities. **Methods:** Development of the SOBDA questionnaire consisted of three components. First, focus groups of patients with COPD were asked to describe their experiences of SOB with daily activities. A pool of items was drafted on the basis of information from the focus groups and literature reviews, and then discussed among instrument development and clinical experts. Cognitive debriefing interviews of patients were conducted to assess the draft item pool, and their feedback was used to develop newer versions of the questionnaire. Input was also sought from the Food and Drug Administration, patients, and clinicians. **Results:** Forty patients participated in seven focus groups. The terms most often used to describe SOB were “short of breath” or

“difficulty breathing.” Patients were clearly able to distinguish SOB from chest congestion and wheezing, other common symptoms associated with COPD. The resulting item pool contained 37 items to assess SOB associated with everyday activities, and concept saturation was reached. Thirty-seven patients participated in the subsequent cognitive debriefing interviews. Patients found the items clear and easy to understand with relevance to their everyday experiences, and easy to use in an electronic format. **Conclusions:** Instructions and response options to the SOBDA questionnaire were well understood by patients with COPD, and item relevance was confirmed. Prospective validation and item reduction studies are highly anticipated. **Keywords:** COPD, patient-reported outcomes, qualitative research, quality of life.

Copyright © 2012, International Society for Pharmacoeconomics and Outcomes Research (ISPOR). Published by Elsevier Inc.

### Introduction

Chronic obstructive pulmonary disease (COPD) is a preventable and treatable disease characterized by progressive airflow limitation that is not fully reversible [1]. It is associated with an abnormal inflammatory response in the lung to noxious particles or gases.

The principal marker for the physiologic changes in airflow limitation, which is characteristic of the disease, is lung function, measured as forced expiratory volume in 1 second (FEV1). This marker correlates poorly with the severity of dyspnea (usually described by patients as shortness of breath [SOB]) and other symptoms of COPD [1,2]. Therefore, changes in FEV1 may not always reflect symptomatic changes that are clinically meaningful for patients. A variety of biologic, physiologic, and symptomatic markers are currently being explored as alternative methods for assessing disease severity, response to therapy, and disease progression [3–5].

Dyspnea is one of the most common and disabling symptoms in COPD [3,6,7]. It is frequently associated with decreases in

functional status, physical activity, and quality of life [8–10]. The therapeutic goals for patients with COPD include relief from symptoms such as dyspnea, improving health status, preventing and treating exacerbations, slowing the progression of disease, and reducing mortality [1,11]. Licensed indications for most current COPD treatments are limited to improving airflow obstruction, and yet no US Food and Drug Administration (FDA)-approved pharmacologic therapy currently has information on dyspnea in its US label. As dyspnea is so important to the lives of patients with COPD and it affects many of their daily activities, the relationship between the two is important to properly evaluate.

The relationship between physical activity and breathlessness in COPD is complex, and various models have been developed to help facilitate an understanding of this association. Jolley and Moxham [9] described a physiologic model of patient-reported breathlessness based on the relationship between ventilatory load, respiratory muscle capacity, neural respiratory drive, and neuromechanical dissociation during daily activities. Conversely,

Conflicts of interest: This work was supported by GlaxoSmithKline. MW, PB, and CC are employees of GlaxoSmithKline; KH, TW, IW, and LR are employees of the United BioSource Corporation who were paid for services by GlaxoSmithKline in connection with the development of this manuscript; JP is a former employee of the United BioSource Corporation.

\* Address correspondence to: Teresa K Wilcox, United BioSource Corporation, 7101 Wisconsin Avenue, Suite 600, Bethesda, MD 20814, USA

E-mail: [teresa.wilcox@unitedbiosource.com](mailto:teresa.wilcox@unitedbiosource.com).

1098-3015 – see front matter Copyright © 2012, International Society for Pharmacoeconomics and Outcomes Research (ISPOR).

Published by Elsevier Inc.

<http://dx.doi.org/10.1016/j.jval.2012.06.018>



Victorson et al. [12] developed a conceptual model to inform patient-reported outcome (PRO) instrument development using patient descriptions of dyspnea and functional limitations in COPD. On the basis of qualitative research, Victorson's group concluded that five primary components make up the patient's experience of dyspnea: breathlessness, fatigue, activity modification, activity limitation, and emotional response. Their model describes how dyspnea symptoms impair function and are mediated by personal and environmental factors. Both the physiologic and conceptual models provided a structure on which to base Shortness of Breath with Daily Activities (SOBDA) questionnaire development for measuring the severity of breathlessness during daily activities. With the understanding gained from these models, we attempted to assess qualitative outcomes in COPD relating to dyspnea.

Qualitative studies are increasingly recognized to be as important to our understanding of the patient experience of dyspnea as studies focusing on other physical aspects of COPD. The results of such studies explain, at least in part, why two people with the same physiologic markers of COPD severity often experience and describe different levels of dyspnea. To develop an instrument that accurately captures how patients perceive dyspnea, a patient-centered approach using their words to describe symptoms is necessary. Such an instrument needs to be valid, reliable, and responsive to change, meeting the criteria outlined in the FDA PRO Guidance document [13], if the intent is to support a label claim for a medicinal product in the United States. No instruments for assessing COPD-related dyspnea have been qualified for the target population to achieve an indication of a medicinal product by the FDA for inclusion into product labels at the time of writing. We developed the SOBDA questionnaire to assess the impact of daily activities on dyspnea in patients with COPD. The goal of this phase of development was to construct an instrument for assessing SOB during patient-identified daily activities that is based on patient feedback on specific terminology and patient experiences with SOB.

## Methods

The process for developing the SOBDA questionnaire involved multiple steps and review processes. Focus groups of patients with COPD were conducted in clinic offices and meeting rooms in San Diego, CA, San Antonio, TX, New Brunswick, NJ, and Miami, FL, and each session lasted for approximately 1.5 to 2 hours. The moderator's discussion guide for the focus groups was developed on the basis of current relevant literature, learnings from previous models such as those developed by Jolley and Moxham [9] and Victorson et al. [12], and input from clinical experts, and was used to facilitate discussions on patients' experiences of SOB with daily activities. A pool of items was drafted on the basis of information gathered from the focus groups and literature reviews, and these items were then discussed among instrument development and pulmonary experts. In addition, four translation experts and a lexibility expert reviewed the questionnaire to ensure cross-cultural equivalence and translational feasibility, as well as clarity of wording. Cognitive debriefing interviews of patients were subsequently conducted to evaluate the draft item pool, and feedback from these interviews was used to develop newer versions of the questionnaire.

## Patients

For both the focus group discussions (phase 1) and cognitive debriefings (phase 2), efforts were made to recruit from pulmonary clinics in the United States participants with a variety of educational, sociodemographic, and ethnic backgrounds, as well as diverse disease experiences. The demography and clinical characteristics of the recruited participants were intentionally

chosen to include and expand beyond that of a typical COPD clinical trial population in order for the instrument to be able to be used in a broader trial population. Economic diversity was addressed by using zip codes as a surrogate for socioeconomic status [14]. Clinics from across the United States were instructed to enroll participants with different disease severities to achieve the following target population: 15% Global Initiative for Chronic Obstructive Lung Disease (GOLD) stage I, 35% GOLD stage II, 35% GOLD stage III, and 15% GOLD stage IV. The target number of desired participants for this study was 40; however, the total number could be modified on the basis of whether concept saturation (i.e., no new concepts or information emerging from subsequent focus groups) was reached [15–18]. Saturation was expected to be reached during focus group discussions by approximately 30 patients. If saturation was not reached, additional participants could be added. Protocols were approved by an institutional review board, and patient consent was obtained prior to the discussion of study-related materials. Clinicians completed an enrollment form, confirming each patient's eligibility and disease severity.

Inclusion criteria were as follows: 40 to 80 years of age; current or former smokers with a history of at least 10 pack-years; current diagnosis of COPD and/or chronic bronchitis as defined by the GOLD initiative [1]; willing and able to provide written informed consent; able to participate in a group discussion; and able to speak and read English.

Exclusion criteria were as follows: respiratory disorders other than COPD (e.g., asthma); organic heart disease with resultant left ventricular failure and New York Heart Association class II to IV; clinically relevant bronchiectasis; recent COPD exacerbation (within previous 60 days); neuromuscular disease; possible causes of significant dyspnea/fatigue other than COPD, including severe anemia; and concurrent medical or psychiatric condition or cognitive impairment potentially affecting participation in the study.

## Measures

Upon completion of both the focus group discussions and cognitive debriefings, all patients completed a brief sociodemographic questionnaire that provided reviewers with additional information on the patient population. In addition, patients were assessed by using the following validated measures: the modified Medical Research Council dyspnea scale [19], the St. George's Respiratory Questionnaire for COPD patients [20,21], and the Chronic Respiratory Questionnaire – Self-Administered Standardized [22–24].

## Focus Groups

Moderators used a standardized discussion guide to solicit terminology used by patients to describe the sensation of dyspnea and to explore the circumstances in which participants experienced the sensation. Patients were initially asked to “tell me about your breathing,” which prompted them to explain their experience with dyspnea and the differences in sensations of dyspnea compared with chest congestion, chest tightness, and wheezing. Patients were then asked to describe the general activities they conducted on a daily basis, as well as their level of dyspnea as they conducted these activities. Moderators probed on specific dyspnea-inducing aspects of the activities, and patients were asked to describe any body movements or positions that impact dyspnea. All discussion probes were phrased as open-ended questions, using only the terminology that patients provided. The verbatim terms that patients used to describe their dyspnea were coded for the frequency of occurrence. As each concept reached saturation, final sessions were focused on supplementing missing information relating to activities, but an open discussion of the other topics was still encouraged by the moderators.

### Item Pool Development

Based on the literature review and results of the focus groups, a pool of items was drafted and discussed among instrument development and clinical experts. The draft pool was adjusted to improve grammar and ensure cross-cultural equivalence and translational feasibility according to standard cross-cultural translation and adaptation processes [25]. Response options were based on the focus group results and modified to include feedback on all levels of dyspnea.

As the SOBDA questionnaire was intended to be completed daily using an electronic format, the items were loaded onto a LogPad personal digital assistant by PHT Corporation. Items and responses too long to fit on the screen were adjusted; the shortening of items and responses is a standard procedure when transitioning from paper to an electronic format and did not require significant changes to the wording of existing items [26]. A review by translation experts and a lexibility expert resulted in Version 1.0 of the SOBDA questionnaire.

### Cognitive Debriefing Interviews

Four rounds of one-to-one cognitive debriefing interviews were conducted in San Antonio, TX, New Brunswick, NJ, and Topeka, KS. An interview guide with structured and open-ended questions was developed to optimize consistency. Probes were also used to understand how patients interpreted wording in the questionnaire and how they selected their response. The response options (slightly, moderately, severely, and so severe that I could not do the activity) were based on the commonly used Likert scale [27], and patients were asked whether these options were meaningful in terms of their own SOB experience. For each of the response options, patients were asked to provide an activity causing them to experience that level of SOB. Stick figures were used to demonstrate body positions associated with various activities because of the impact certain positions have on SOB. During each interview, patients were shown stick figures in various positions and asked what activities they may conduct in such positions. These figures were included as a referent for the activity described in the text as well as to provide a starting point from which activities could be culturally adapted during the translation process. Although the activities could be altered on the basis of cultural relevance, the body position represented by the stick figures remained the same. The interview guide was updated after each round of interviews, on the basis of patients' comments.

During each round of cognitive interviews, the electronic format of the SOBDA questionnaire was used. Version 1.0 of the SOBDA questionnaire was used in the first two rounds of cognitive debriefing interviews, and this was then refined on the basis of participant feedback and suggestions. Version 1.1 was administered during the third round of interviews, and further changes were subsequently made. The resulting Version 1.2 was reviewed internally by GlaxoSmithKline experts and updated, and Version 1.3 was submitted as part of a briefing package to the FDA. The questionnaire was modified on the basis of FDA feedback, after which Version 1.4 was developed and used during a fourth round of interviews, conducted in Houston, TX, and Topeka, KS. Patients were asked to "think aloud" when they read each question, and to describe the time frame and factors they considered when selecting their response. Also, patients were asked whether they understood the instructions and could explain them in their own words.

### Data Analysis

Descriptive statistics (mean, SD, and frequency) were used to characterize the focus group and cognitive debriefing samples in terms of sociodemographic, health status, and clinical characteristics.

Focus group data analysis focused on establishing content validity of the information gathered [13] and was based on

audiotapes, notes taken by the moderator, and moderator recall of the discussions. The evaluation included 1) generation of key words, phrases, and quotes; 2) rating of these attributes by importance (based on the frequency of which symptoms were mentioned within and between focus groups); and 3) identification of additional themes relevant to participants' experiences. A qualitative analysis software program, ATLAS.ti Version 5.0 [28], facilitated the process. From the evaluation process, a preliminary coding dictionary was developed by a team composed of four members, including two focus group moderators. Words and phrases were selected and grouped into key themes, attributes, concepts, and relationships. Subsequent revisions were made by the team to refine the concepts and respective definitions.

### Focus Group Saturation

The FDA guidance requires evidence of saturation to establish content validity in the development of PRO instruments designed for use as clinical trial end points [13]. The number of participants needed to reach saturation is largely driven by the complexity of the concept and the diversity of the participants.

The qualitative data were examined following the focus groups for specific issues and concerns associated with the SOBDA questionnaire. Instrument revisions were considered on the basis of cognitive debriefing interviews. Qualitative data from the last round of interviews were compared with earlier data to explore patients' interpretation of the items, which enabled the degree of saturation to be assessed.

## Results

### Focus Group Discussions

#### Participant demography and clinical characteristics

Phase 1 (concept elicitation) consisted of seven focus group discussions. A total of 40 patients participated in these focus groups that were conducted in California, Texas, New Jersey, and Florida over a 3-month period. Demographic and clinical characteristics of the patients are provided in Table 1.

#### Emerging themes and concepts and patient description of dyspnea

No differences were found in the descriptions of dyspnea, or activities/experiences with dyspnea between genders or across ethnic or socioeconomic backgrounds. Throughout all focus groups, patients described a feeling of not being able to breathe deeply enough to pull a sufficient amount of air into their lungs. They felt that their lungs could not expand enough to get a full breath of air and described the struggle they had in overcoming the perceived restriction.

The terms "shortness of breath," "difficulty breathing," "labored breathing," "can't breathe," and "out of breath" were frequently used to describe the sensation of dyspnea from COPD. Among all ethnic groups, the expressions "short of breath" or "difficulty breathing" were used most often.

There was consistent distinction between SOB and chest congestion, chest tightness, and wheezing. Chest congestion was described as the sensation of having phlegm or mucus in the chest or throat, with the need to expel or cough. When the moderator probed further, patients reinforced that chest congestion was very different from SOB. Patients often discussed chest tightness in conjunction with SOB, but patients confirmed that these were two different feelings. Most times, chest tightness was described as being a precursor or an indicator that they would not be able to take the next breath as easily. Wheezing was associated with the sound of having phlegm or mucus stuck in the chest or throat.

Some patients were unaware of when they were wheezing, while others were highly bothered by the noise. All patients emphatically concluded that wheezing was different from being short of breath.

**SOB with Activity**

Patients provided a variety of activities in which they experienced SOB. Throughout the group sessions, it became increasingly evident that SOB with some activities had a greater association with body position, as well as the level of exertion. Many patients experienced an increased level of SOB simply by sitting down and bending to tie their shoelaces. A number of body positions were

identified in which patients experienced SOB; patients were asked to identify activities they might do in those positions. Fig. 1 includes a symptom model from the patient perspective. This disease model demonstrates the link between the SOBDA questionnaire items and the pathophysiologic factors associated with SOB. Table 2 provides patients' descriptions of SOB and SOB-related limitations.

**Focus Group Saturation**

Table 3 presents evidence that saturation of the various components of dyspnea described was met through the seven focus

**Table 1 – Demographic and clinical characteristics.**

| Characteristics                          | Focus group participants (n = 40) | Cognitive debriefing participants (n = 37) | Qualitative research total sample (n = 77) |
|------------------------------------------|-----------------------------------|--------------------------------------------|--------------------------------------------|
| Age (y), mean ± SD                       | 66.0 ± 9.0                        | 61.1 ± 11.8                                | 63.6 ± 10.6                                |
| Gender, n (%)                            |                                   |                                            |                                            |
| Male                                     | 16 (40.0)                         | 20 (54.1)                                  | 36 (46.8)                                  |
| Race, n (%)*                             |                                   |                                            |                                            |
| White                                    | 25 (62.5)                         | 22 (59.5)                                  | 47 (61.0)                                  |
| Black/African American                   | 7 (17.5)                          | 3 (8.1)                                    | 10 (13.0)                                  |
| Hispanic or Latino                       | 5 (12.5)                          | 5 (13.5)                                   | 10 (13.0)                                  |
| Asian                                    | 1 (2.5)                           | 7 (18.9)                                   | 8 (10.4)                                   |
| Other                                    | 2 (5.0)                           | 1 (2.7)                                    | 3 (3.9)                                    |
| Employment, n (%)*                       |                                   |                                            |                                            |
| Full-time/part-time                      | 12 (30)                           | 16 (43.2)                                  | 28 (36.4)                                  |
| Retired                                  | 20 (50.0)                         | 16 (43.2)                                  | 36 (46.8)                                  |
| Disabled                                 | 7 (17.5)                          | 7 (18.9)                                   | 14 (18.2)                                  |
| Other                                    | 3 (7.5)                           | 2 (5.4)                                    | 5 (6.5)                                    |
| Education, n (%)                         |                                   |                                            |                                            |
| High school or less                      | 23 (57.5)                         | 22 (59.5)                                  | 45 (58.5)                                  |
| Associate degree/technical/trade school  | 6 (15.0)                          | 7 (18.9)                                   | 13 (16.9)                                  |
| College                                  | 6 (15.0)                          | 5 (13.5)                                   | 11 (14.3)                                  |
| Graduate degree                          | 2 (5.0)                           | 3 (8.1)                                    | 5 (6.5)                                    |
| Other                                    | 3 (7.5)                           | 0 (0)                                      | 3 (3.9)                                    |
| GOLD stage, n (%)                        |                                   |                                            |                                            |
| I                                        | 3 (7.5)                           | 10 (27.0)                                  | 13 (16.9)                                  |
| II                                       | 13 (32.5)                         | 11 (29.7)                                  | 24 (31.2)                                  |
| III                                      | 21 (52.5)                         | 8 (21.6)                                   | 29 (37.7)                                  |
| IV                                       | 3 (7.5)                           | 8 (21.6)                                   | 11 (14.3)                                  |
| Pulmonary function, mean ± SD            |                                   |                                            |                                            |
| FEV1 (L)                                 | 1.3 ± 0.6 <sup>†</sup>            | 1.8 ± 0.8                                  | 1.6 ± 0.8 <sup>‡</sup>                     |
| FEV1 (% predicted)                       | 51.4 ± 19.9 <sup>†</sup>          | 61.5 ± 24.1                                | 56.5 ± 22.5 <sup>‡</sup>                   |
| FVC (L)                                  | 2.3 ± 0.8 <sup>†</sup>            | 3.0 ± 1.1                                  | 2.7 ± 1.0 <sup>‡</sup>                     |
| mMRC, mean ± SD                          | 3.0 ± 1.0                         | 2.8 ± 0.9                                  | 2.9 ± 0.9 <sup>‡</sup>                     |
| Clinician-rated mMRC, n (%)              |                                   |                                            |                                            |
| No breathlessness                        | 3 (7.5)                           | 1 (2.7)                                    | 4 (5.2)                                    |
| Breathlessness when hurrying             | 9 (22.5)                          | 15 (40.5)                                  | 24 (31.2)                                  |
| Walks slower than people of the same age | 10 (25.0)                         | 12 (32.4)                                  | 22 (28.6)                                  |
| Stop for breath                          | 15 (37.5)                         | 9 (24.3)                                   | 24 (31.2)                                  |
| Too breathless                           | 0 (0)                             | 0 (0)                                      | 0 (0)                                      |
| Did not respond                          | 3 (7.5)                           | 0 (0)                                      | 3 (3.8)                                    |
| SGRQ-C                                   |                                   |                                            |                                            |
| Total, mean ± SD                         | 52.4 ± 20.1                       | 51.0 ± 19.1 <sup>  </sup>                  | 51.7 ± 19.5 <sup>*</sup>                   |
| Symptom, mean ± SD                       | 63.7 ± 21.3                       | 55.4 ± 32.0                                | 59.7 ± 27.1                                |
| Activity, mean ± SD                      | 64.5 ± 24.3                       | 65.3 ± 24.6 <sup>†</sup>                   | 64.9 ± 24.3 <sup>#</sup>                   |
| Impact, mean ± SD                        | 40.9 ± 22.7                       | 39.3 ± 20.2 <sup>†</sup>                   | 40.1 ± 21.5 <sup>#</sup>                   |

(Continued on next page)

Table 1 (continued)

| Characteristics                       | Focus group participants (n = 40) | Cognitive debriefing participants (n = 37) | Qualitative research total sample (n = 77) |
|---------------------------------------|-----------------------------------|--------------------------------------------|--------------------------------------------|
| CRQ-SAS                               |                                   |                                            |                                            |
| Dyspnea, mean $\pm$ SD                | 4.6 $\pm$ 1.6                     | 5.0 $\pm$ 1.5**                            | 4.8 $\pm$ 1.5 <sup>†</sup>                 |
| Fatigue, mean $\pm$ SD                | 4.1 $\pm$ 1.1                     | 4.2 $\pm$ 1.3 <sup>††</sup>                | 4.1 $\pm$ 1.2 <sup>‡</sup>                 |
| Emotional, mean $\pm$ SD              | 4.5 $\pm$ 1.0                     | 4.6 $\pm$ 0.9 <sup>††</sup>                | 4.5 $\pm$ 1.0 <sup>‡</sup>                 |
| Mastery, mean $\pm$ SD                | 4.0 $\pm$ 0.8                     | 4.5 $\pm$ 1.0 <sup>††</sup>                | 4.2 $\pm$ 0.9 <sup>‡</sup>                 |
| Smoking Status                        |                                   |                                            |                                            |
| Current smoker, n (%)                 | 10 (25.0)                         | 14 (37.8)                                  | 24 (31.2)                                  |
| Ex-smoker, n (%)                      | 28 (70.0)                         | 23 (62.2)                                  | 51 (66.2)                                  |
| Did not respond                       | 2 (5.0)                           | 0 (0)                                      | 2 (2.6)                                    |
| Current smoker (y), mean $\pm$ SD     | 36.0 $\pm$ 16.7                   | 29.0 $\pm$ 17.6                            | 31.9 $\pm$ 17.2                            |
| Ex-smoker—years smoked, mean $\pm$ SD | 33.4 $\pm$ 10.7                   | 34.8 $\pm$ 11.2 <sup>††</sup>              | 34.0 $\pm$ 10.8 <sup>‡‡</sup>              |

COPD, chronic obstructive pulmonary disease; CRQ-SAS, Chronic Respiratory Questionnaire – Self-Administered Standardized; FEV1, forced expiratory volume in 1 s; FVC, forced vital capacity; GOLD, Global Initiative for Chronic Obstructive Lung Disease; mMRC, modified Medical Research Council; SGRQ-C, St. George's Respiratory Questionnaire for COPD patients.

\* Not mutually exclusive.

<sup>†</sup> n = 36.

<sup>‡</sup> n = 73.

<sup>‡‡</sup> n = 74.

<sup>‡‡‡</sup> n = 35.

<sup>‡‡‡‡</sup> n = 75.

<sup>‡‡‡‡‡</sup> n = 76.

<sup>‡‡‡‡‡‡</sup> n = 33.

<sup>‡‡‡‡‡‡‡</sup> n = 34.

<sup>‡‡‡‡‡‡‡‡</sup> n = 22.

<sup>‡‡‡‡‡‡‡‡‡</sup> n = 49.

groups in this study. Specifically, saturation was met in the terminology that patients use to describe dyspnea (“short of breath,” “can’t catch breath,” and “trouble breathing”), body positions (e.g., bending or reaching), and activities when patients experience dyspnea (showing, dressing, housework, exercise, etc.). It was therefore determined that additional focus groups were not necessary. Spontaneous versus probed tallies were not made during the focus groups as concepts were spontaneous only for the first time one patient mentions a concept; it is probed thereafter because the concept is already known to patients and they no longer have the opportunity to be spontaneous.

### Item Pool Development

#### Item wording

Key words used by the patients (e.g., “short of breath” and “dressing”) were instrumental in the development of each item. The importance of key words was determined on the basis of the frequency with which a particular word was used. Body positions of the stick figure illustrations were described by the patients and entered into a grid, followed by activities identified by the patients

for each body position. Response options were also chosen on the basis of patient descriptions of SOB severity from the focus group sessions, including “did not do” to account for adaptation by the patient. Some patients stated that they had difficulty interpreting what “I did not do” meant to them. To clarify the meaning of this response option, “I did not do” was changed to “I did not do the activity today.” In addition, some activities may or may not be performed because of gender; however, the majority of patients stated that their gender did not impact whether they performed the activities listed on the questionnaire.

### Cognitive Debriefing Discussions

#### Patient demography and clinical characteristics

Phase 2 consisted of cognitive debriefing interviews. A total of 37 patients participated in these interviews over a 3-month period: 10 patients participated in the first round, 10 patients in the second round, 5 patients in the third round, and 12 patients in the fourth round. The patients' demographic and clinical characteristics are provided in Table 1.

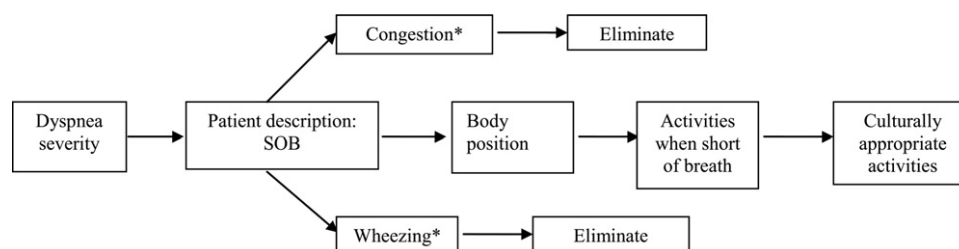

Fig. 1 – Symptom model from a patient's perspective. \* During the focus group discussions, patients were able to distinguish SOB from congestion and wheezing.

**Table 2 – Patient descriptions of dyspnea (shortness of breath).**

|                                                                                                                                                                                                                                                                                                                                        |
|----------------------------------------------------------------------------------------------------------------------------------------------------------------------------------------------------------------------------------------------------------------------------------------------------------------------------------------|
| Description of shortness of breath                                                                                                                                                                                                                                                                                                     |
| “Well, it’s like breathing inside a box or something. It’s just kind of a restricted feeling. It’s uncomfortable. It’s restricting.”                                                                                                                                                                                                   |
| “You can’t catch your breath.”                                                                                                                                                                                                                                                                                                         |
| “Without air.”                                                                                                                                                                                                                                                                                                                         |
| “Struggling for breath.”                                                                                                                                                                                                                                                                                                               |
| “Breath gets a little short.”                                                                                                                                                                                                                                                                                                          |
| “I can’t expand my lungs. I can’t pull in enough air.”                                                                                                                                                                                                                                                                                 |
| “Gasp[ing].”                                                                                                                                                                                                                                                                                                                           |
| “You can’t get enough air or oxygen, or whatever the hell it is, to catch your breath.”                                                                                                                                                                                                                                                |
| “Like a struggle for a deep breath. It’s like struggling for breath.”                                                                                                                                                                                                                                                                  |
| “Because really shortness of breath is struggling to take that deep breath. It’s like breathing shallowly as opposed to breathing deeply. I guess I normally would breathe shallowly, and then when sometimes you want to take a deep breath and you just can’t get it.”                                                               |
| “It’s like you’ve got a wet towel over your face.”                                                                                                                                                                                                                                                                                     |
| “Well, you suffocate—it’s absolutely suffocating.”                                                                                                                                                                                                                                                                                     |
| Description of shortness of breath with activities                                                                                                                                                                                                                                                                                     |
| “On the floor and I’m picking stuff up.”                                                                                                                                                                                                                                                                                               |
| “It could be sweeping.”                                                                                                                                                                                                                                                                                                                |
| “Vacuuming and moving furniture around.” “Like cleaning house or something like that, vacuuming is my worst and when I wash windows. But I’m an up-and-down, bending-over type of window washer.”                                                                                                                                      |
| “I have a chair in my shower. I can’t stand up and do this to my hair.”                                                                                                                                                                                                                                                                |
| “I’ve gotten breathless in the shower a couple times, and I just now have realized why. And it is, it’s the bending over to shave my legs. That’s what it is, and I had not related anything to bending over.”                                                                                                                         |
| Adaptation                                                                                                                                                                                                                                                                                                                             |
| “I used to belong to the gym, and I don’t even attempt to do that anymore. Because I really liked the walking and the treadmill and the weights. You’re allowed so much time on the weights, but people are waiting. If it’s going to take you twice as long to use the weights than someone else, people are going to get impatient.” |
| “I don’t do too much reaching because I organized everything in my house that it’s probably just as high as I have to go..... Because I organize things so I don’t have to stretch or do things.”                                                                                                                                      |
| “I cannot talk while I’m going up the stairs. If people want you to “talk” as you’re walking along and going up stairs, I can’t do both. I can do one or the other.”                                                                                                                                                                   |

**Cognitive Debriefing Interviews (First Three Rounds)**

Each interview lasted 1.5 to 2 hours. Overall, the SOBDA questionnaire was well received: patients confirmed that the questionnaire was clear and easy to understand and captured most daily activities. Patients reported that the items were, in general, relevant to their experiences with breathing problems while performing their daily activities. However, those with more severe COPD found some of the items to be less relevant because they were not able to do the activities. In addition, patients were asked whether their gender affected their likelihood of undertaking activities on the questionnaire; the majority said “no.”

The SOBDA questionnaire is intended to be used as a daily diary. However, several interviews were conducted in the morning, which made it difficult for patients to think about their

experiences “today” because it was early. A few patients stated that they thought of a “typical day” or “yesterday” when completing the questions. The patients stated that the instructions and response options on the questionnaire made it very clear that the time frame is “today,” meaning the period of time from when they woke up until they went to bed and that patients should complete the questionnaire before they go to bed at the end of the day.

**Fourth Round of Cognitive Debriefing Interviews**

Following consultation with the FDA, feedback was received stating that illustrating an activity with a specific body position might imply a requirement to perform the activity in that position, while in practice there is variation (e.g., some participants may brush their teeth while standing up instead of bending over the sink). Consequently, the stick figure illustrations were removed to avoid the risk of confusion or nonresponse (“did not do the activity today”). The response options and instructions were also modified on the basis of FDA feedback.

The resulting version (Version 1.4) was presented to patients in the fourth round of cognitive debriefing interviews. Participants with less severe COPD found some items to be less relevant to their SOB experiences, but the range of items successfully ensured applicability across a wide range of patients. Patients using Version 1.4 reported that the instructions were clear and easy to understand. Their explanations of what the instructions and time frame meant were appropriate and indicated correct interpretation.

**Electronic Format User Acceptability**

During all the cognitive debriefing interviews, patients were briefly instructed on how to use the electronic questionnaire, and then asked to answer SOBDA questionnaire items by using a personal digital assistant. During the first three rounds of interviews, participants reported that the electronic format was easy to use and that they would not have a problem using the device in a study. In the fourth round, patients who commented on the use of the personal digital assistant did not report any difficulty.

**Discussion**

In developing an instrument to assess disease symptoms from the patient perspective, the use of patient-based terminology is critical. The SOBDA questionnaire was developed by using a patient-centered approach to the terminology and structure, and patients considered the resulting questionnaire to be clear and easy to understand. In addition, in order to account for possible issues regarding translatability and cultural differences, four translation experts and one lexibility expert reviewed the conceptual model and provided feedback on its relevance in specific countries and at the global level and on the overall translatability of the instrument. In accordance with standard cross-cultural translation and adaptation processes, adjustments were made throughout the development of the SOBDA questionnaire to create an instrument with items that were understandable across cultures, at the appropriate reading grade level for all patients, particularly in areas of limited health literacy, and that could be utilized in clinical trials worldwide [25].

Patients with COPD usually use the term “shortness of breath” to describe their dyspnea [29–36]. Patients with COPD perceive SOB as one of the major symptoms impairing their quality of life and well-being. Ho et al. [8] reported that patients experiencing dyspnea scored significantly lower in all four domains (mobility, kitchen, domestic and leisure activities) of the Nottingham Extended Activities of Daily Living index than do those not experiencing dyspnea [37]. Mobility tasks were affected to the greatest extent. There was also a significant difference in total Hospital Anxiety and Depression

Table 3 – FG saturation grid.

|                                       | FG1<br>(n = 8) | FG2<br>(n = 9) | FG3<br>(n = 5) | FG4<br>(n = 4) | FG5<br>(n = 7) | FG6<br>(n = 4) | FG7<br>(n = 5) |
|---------------------------------------|----------------|----------------|----------------|----------------|----------------|----------------|----------------|
| Dyspnea terms                         |                |                |                |                |                |                |                |
| SOB                                   | ✓              | ✓              | ✓              | ✓              | ✓              | ✓              | ✓              |
| Can't catch breath                    | ✓              | ✓              | ✓              | ✓              | ✓              |                | ✓              |
| Trouble breathing                     | ✓              | ✓              | ✓              |                |                |                | ✓              |
| Labored breathing                     | ✓              | ✓              | ✓              | ✓              | ✓              |                | ✓              |
| Activity                              |                |                |                |                |                |                |                |
| Showering                             |                |                | ✓              | ✓              | ✓              | ✓              |                |
| Dressing                              |                |                |                | ✓              | ✓              | ✓              |                |
| Brushing teeth                        | ✓              |                |                | ✓              |                |                |                |
| Grooming                              | ✓              | ✓              |                | ✓              | *              |                |                |
| Tying shoelaces, pantyhose, and socks |                | ✓              | ✓              | ✓              | ✓              |                | *              |
| Vacuuming                             | ✓              | ✓              |                | ✓              |                |                |                |
| Housework/ cleaning                   | ✓              | ✓              |                | ✓              | ✓              | ✓              | ✓              |
| Grocery shopping                      | ✓              | ✓              | ✓              | ✓              | ✓              | *              |                |
| Getting mail                          |                |                |                |                |                |                |                |
| Sex                                   | ✓              |                |                |                | ✓              |                |                |
| Walking on level                      | ✓              | ✓              | ✓              | ✓              | ✓              | ✓              | ✓              |
| Walking on incline                    | ✓              | ✓              |                | ✓              | ✓              | ✓              | ✓              |
| Swimming                              |                |                | ✓              |                | ✓              | ✓              | ✓              |
| Biking                                |                |                | ✓              |                | ✓              |                |                |
| Gardening/yard work                   | ✓              | ✓              | ✓              | ✓              | ✓              | ✓              | ✓              |
| Talking                               |                |                | ✓              | ✓              |                | *              |                |
| Laughing                              |                |                |                |                | ✓              |                |                |
| Dancing                               |                | ✓              |                |                | ✓              |                |                |
| Carrying heavy objects                |                |                |                |                | ✓              | ✓              | ✓              |

FG, focus group; SOB, shortness of breath.

\* Participants noted as affecting their breathing only after being prompted by the moderator. FG, focus group; SOB, shortness of breath.

Scale scores between dyspneic subjects and nondyspneic subjects, suggesting that breathing problems are associated with anxiety and depression [37–41]. Patients have described dyspnea as being “hard work” [42], “a constant struggle” [43,44], “a continuous fight” [45], “painful,” “taking all one’s strength,” and “exhausting” [44].

Study participants often find it difficult to convey their personal experience of dyspnea to others. Nicholls [44] observed that patients may instead describe dyspnea by creating mental pictures: “a dark cloud,” “a battle,” “a wall,” or metaphorically, describing that “life was closing in” or that they needed to “steer a careful course” if dyspnea was unpredictable. However, such descriptions are difficult to quantify, necessitating the use of other measures to capture patient experiences. Previously developed PRO questionnaires do not adequately address the dyspnea component of COPD or meet FDA standards for instrument development. For example, the St. George’s Respiratory Questionnaire for COPD patients and other measures such as Chronic Respiratory Questionnaire – Self-Administered Standardized (although well used) have not undergone rigorous study in terms of content validity and ability to reflect patient voice. The FDA requires content validity and saturation of data to be demonstrated for PROs in order for the data to support labeling and promotional claims [13].

In line with FDA guidance, this research was designed to gather qualitative evidence to inform the development of a new PRO instrument, with a focus on measuring the effect of dyspnea on the daily activities of patients with COPD. An important component of qualitative research is establishing content validity. Content validity is the extent to which the content of an instrument represents the most important aspects of a given concept [46]. In the FDA guidance on PRO measurement, content

validity is defined as evidence that the items and domains of an instrument are appropriate and are comprehensive relative to its intended measurement concept, population, and use [13]. Such evidence includes documentation from qualitative research, which demonstrates that the PRO instrument measures the concept of interest. In addition, qualitative patient data are essential for establishing content validity of a PRO instrument. Content validity is essential for the interpretability of the concept measured. Qualitative data in the current evaluation were collected through focus groups with patients with COPD, reviewed by experts in pulmonary research to assess content validity from a clinical perspective, reviewed by translation experts to minimize potential translation difficulties and cross-cultural differences, and discussed during cognitive debriefing interviews with patients to ensure that the draft instrument remained understandable and relevant. The usability of the SOBDA questionnaire on an electronic device was also assessed. The extensive involvement of patients with characteristics typical of those with COPD ensured that the questionnaire effectively reflects patients’ own perspectives.

This article highlights the most important issues and ideas that came out of the focus groups. The terminology used by patients to describe the sensation of dyspnea (SOB), and the varying degrees of SOB associated with everyday activities and hobbies, was the primary focus of discussion. Patients were able to distinguish SOB from chest congestion, wheezing, and chest tightness, and most often described their experience with terms such as “short of breath” and “difficulty breathing.”

Focus group transcripts were central to the development of the item pool. Items were derived from patient comments and experiences related to everyday activities. Stick figure illustrations

were initially included within the instrument because of the reported impact of body position on SOB. The illustrations were later removed from the questionnaire following feedback received from the FDA. It is anticipated, however, that they will be useful during the process of translating the questionnaire as they provide additional information to ensure cross-cultural equivalence.

The qualitative data obtained during the cognitive debriefing interviews were used to confirm the content validity of items selected for the SOBDA questionnaire. Overall, descriptions of dyspnea did not vary across the GOLD stages. The activities listed in the questionnaire represented everyday experiences for GOLD stage I to GOLD stage IV patients, although GOLD stage I patients reported SOB difficulty only when doing physically demanding activities. The questions were designed to measure dyspnea associated with daily activities across a wide range of disease severity to ensure suitability of the SOBDA questionnaire for all patients with COPD.

## Conclusions

Qualitative research with patients with COPD was the basis for developing the SOBDA questionnaire. Patients included in the research had the full range of COPD severity and a wide spread across both socioeconomic status and ethnicity. Concept saturation was reached during patient focus groups. Comments from the FDA were carefully considered, and appropriate revisions were made. The item pool contains 37 items to assess SOB associated with everyday activities. Instructions and response options were well understood by patients with COPD, and the items' relevance was confirmed. Scoring, scaling, reliability, validity, and responsiveness will be assessed in future prospective validation studies.

## Acknowledgments

The authors wish to acknowledge the following individuals who actively contributed to the study completion, including: The United BioSource Corporation (UBC) SOBDA team: Evan Davies, Shannon Kummer, Nancy Kline Leidy, Lindsey Murray, Dennis Revicki, Emily Sargent, and Ren Yu, and formerly of UBC, Tiffany Burch, Jennifer Cabaniss, Sherilyn Notte, Jana Oresanya, Kate VanBrunt, and Kim Walters. The PHT team: Kathryn Klitzner, Ed Yost, and Lisa Steffey. The authors would also like to thank the following clinical experts: Caroline Jolley, John Moxham, Fernando Martínez, and Frank Sciorba, and from the clinical sites: Elena Valor, Shari A. Brazinsky, Pedro Sepulveda, and Edward Fein. The authors would also like to acknowledge the following translation and lexibility experts: Fang Ji-Qian, Dr. Santosh Chaturvedi, Laura Schwartzmann, Sonya Eremenco and Chi-Hung Chang. Editorial support in the form of editorial suggestions to draft versions of this paper, collating author comments and copyediting was provided by Tara N Miller at Gardiner-Caldwell Communications (Lyndhurst, NJ, USA) and Cheryl Wright at Gardiner-Caldwell Communications (Macclesfield, UK) and was funded by GlaxoSmithKline.

Source of financial support: Funding for this research was provided by GlaxoSmithKline. All listed authors meet the criteria for authorship set forth by the International Committee for Medical Journal Editors.

## REFERENCES

[1] GOLD: Global Strategy for the Diagnosis, Management, and Prevention of COPD – updated 2011. Available from: <http://www.goldcopd.org>. [Accessed May 23, 2012].

- [2] Nishimura K, Izumi T, Tsukino M, Oga T. Dyspnea is a better predictor of 5-year survival than airway obstruction in patients. *Chest* 2002;121:1434–40.
- [3] Jones PW, Agusti AG. Outcomes and markers in the assessment of chronic obstructive pulmonary disease. *Eur Respir J* 2006;27:822–32.
- [4] Vestbo J, Anderson W, Coxson HO, et al. Evaluation of COPD Longitudinally to Identify Predictive Surrogate Endpoints (ECLIPSE). *Eur Respir J* 2008;31:869–73.
- [5] Han MK, Agusti A, Calverley PM, et al. Chronic obstructive pulmonary disease phenotypes: the future of COPD. *Am J Respir Crit Care Med* 2010;182:598–604.
- [6] Jadad A, Rizo C, Cubillos P, Stahl E. Measuring symptom response to pharmacological interventions in patients with COPD: a review of instruments used in clinical trials. *Curr Med Res Opin* 2004;20:1993–2005.
- [7] Eakin EG, Resnikoff PM, Prewitt LM, et al. Validation of a new dyspnea measure: the UCSD Shortness of Breath Questionnaire. University of California. San Diego. *Chest* 1998;113:619–24.
- [8] Ho SF, O'Mahony MS, Steward JA, et al. Dyspnoea and quality of life in older people at home. *Age Ageing* 2001;30:155–9.
- [9] Jolley CJ, Moxham J. A physiological model of patient-reported breathlessness during daily activities in COPD. *Eur Respir Rev* 2009;18:66–79.
- [10] Watz H, Waschki B, Meyer T, Magnussen H. Physical activity in patients with COPD. *Eur Respir J* 2009;33:262–72.
- [11] Celli BR, MacNee W. Standards for the diagnosis and treatment of patients with COPD: a summary of the ATS/ERS position paper. *Eur Resp J* 2004;23:932–46.
- [12] Victorson DE, Anton S, Hamilton A, et al. A conceptual model of the experience of dyspnea and functional limitations in chronic obstructive pulmonary disease. *Value Health* 2009;12:1018–25.
- [13] Food and Drug Administration. Guidance for industry on patient-reported outcome measures: use in medical product development to support labeling claims. 2009. Available from: [www.fda.gov](http://www.fda.gov). [Accessed May 23, 2012].
- [14] Krieger N. Overcoming the absence of socioeconomic data in medical records: validation and application of a census-based methodology. *Am J Public Health* 1992;82:703–10.
- [15] Patrick DL, Burke LB, Powers JH, et al. Patient-reported outcomes to support medical product labeling claims: FDA perspective. *Value Health* 2007;10(Suppl):S125–37.
- [16] Guest G, Bunce A, Johnson L. How many interviews are enough? An experiment with data saturation and variability. *Field Methods* 2006;18:59–82.
- [17] Leidy NK, Vernon M. Perspectives on patient-reported outcomes: content validity and qualitative research in a changing clinical trial environment. *Value Health* 2007;10(Suppl. 2):S125–37.
- [18] Patrick DL, Burke LB, Gwaltney CJ, et al. Content validity—establishing and reporting the evidence in newly developed Patient-Reported Outcomes (PRO) instruments for medical product evaluation: ISPOR PRO Good Research Practices Task Force Report: part 1—eliciting concepts for a new PRO instrument. *Value Health* 2011;14:967–77.
- [19] Schilling RSF, Hughes JPW, Dingwall-Fordyce I. Disagreement between observers in an epidemiological study of respiratory disease. *BMJ* 1955;1:65–8.
- [20] Jones PW, Quirk FH, Baveystock CM. The St. George's Respiratory Questionnaire. *Respir Med* 1991;85(Suppl. B):25–31.
- [21] Jones PW, Quirk FH, Baveystock CM, Littlejohns P. A self-complete measure of health status for chronic airflow limitation: The St George's Respiratory Questionnaire. *Ann Rev Respir Dis* 1992;145:1321–7.
- [22] Aaron SD, Vandemheen KL, Hebert P, et al. Outpatient oral prednisone after emergency treatment of chronic obstructive pulmonary disease. *N Engl J Med* 2003;348:2618–25.
- [23] Aaron SD, Vandemheen KL, Clinch JJ, et al. Measurement of short-term changes in dyspnea and disease-specific quality of life following an acute COPD exacerbation. *Chest* 2002;121:688–96.
- [24] Parker CM, Voduc N, Aaron SD, et al. Physiological changes during symptom recovery from moderate exacerbations of COPD. *Eur Respir J* 2005;26:420–8.
- [25] Wild D, Grove A, Martin M, et al. Principles of good practice for the translation and cultural adaptation process for patient reported outcome (PRO) measures: report of the ISPOR Task Force for Translation and Cultural Adaptation. *Value Health* 2005;8:94–104.
- [26] Coons SJ, Gwaltney CJ, Hays RD, et al. Recommendations of evidence needed to support measurement of equivalence between electronic and paper-based patient-reported outcome (PRO) measures: ISPOR ePRO Good Research Practices Task Force Report. *Value Health* 2009;12:410–29.
- [27] Likert R. A technique for the measurement of attitudes. *Arch Psychol* 1932;140:1–55.
- [28] Muhr T. User's Manual for ATLAS.ti 5.0 (2nd ed.). Copyright © 2003–2004 by Tomas Muhr. Berlin: ATLAS.ti scientific Software Development, 2004.

- 1  
2  
3  
4  
5  
6 [29] Carrieri VK, Janson-Bjerklie S, Jacobs S. The sensation of dyspnea: a  
7 review. *Heart Lung* 1984;13:436-47.
- 8 [30] Carrieri-Kohlman V, Gormley JM, Eiser S, et al. Dyspnea and the  
9 affective response during exercise training in obstructive pulmonary  
10 disease. *Nurs Res* 2001;50:136-46.
- 11 [31] DeVito AJ. Dyspnea during hospitalizations for acute phase of illness as  
12 recalled by patients with chronic obstructive pulmonary disease. *Heart  
13 Lung* 1990;19:186-91.
- 14 [32] Gift AG, Moore T, Soeken K. Relaxation to reduce dyspnea and anxiety  
15 in COPD patients. *Nurs Res* 1992;41:242-6.
- 16 [33] Lareau S, Larson JL. Ineffective breathing pattern related to airflow  
17 limitation. *Nurs Clin North Am* 1987;22:179-91.
- 18 [34] Mahler DA, Mejia-Alfaro R, Ward J, Baird JC. Continuous measurement  
19 of breathlessness during exercise: validity, reliability, and  
20 responsiveness. *J Appl Physiol* 2001;90:2188-96.
- 21 [35] Small S, Lamb M. Fatigue in chronic illness: the experience of  
22 individuals with chronic obstructive pulmonary disease and with  
23 asthma. *J Adv Nurs* 1999;30:469-78.
- 24 [36] Wasserman K, Casaburi R. Dyspnea: physiological and  
25 pathophysiological mechanisms. *Annu Rev Med* 1988;39:503-15.
- 26 [37] von Leupoldt A, Dahme B. Psychological aspects in the perception of  
27 dyspnea in obstructive pulmonary diseases. *Respir Med*  
28 2007;101:411-22.
- 29 [38] Carrieri-Kohlman V, Donesky-Cuenco D, Park SK, et al. Additional  
30 evidence for the affective dimension of dyspnea in patients with COPD.  
31 *Res Nurs Health* 2010;33:4-19.
- 32 [39] Hill K, Geist R, Goldstein RS, Lacasse Y. Anxiety and depression in end-  
33 stage COPD. *Eur Respir J* 2008;31:667-77.
- 34 [40] Nguyen HQ, Carrieri-Kohlman V. Dyspnea self-management in patients  
35 with chronic obstructive pulmonary disease: moderating effects of  
36 depressed mood. *Psychosomatics* 2005;46:402-10.
- 37 [41] Norwood R, Balkissoon R. Current perspectives on management of co-  
38 morbid depression in COPD. *COPD* 2005;2:185-93.
- 39 [42] Elofsson LC, Ohlen J. Meanings of being old and living with chronic  
40 obstructive pulmonary disease. *Palliat Med* 2004;18:611-8.
- 41 [43] Barnett M. Chronic obstructive pulmonary disease: a  
42 phenomenological study of patients' experiences. *J Clin Nurs*  
43 2005;14:805-12.
- 44 [44] Nicholls DA. The experience of breathlessness. *Physiother Theory Pract*  
45 2003;19:123-36.
- 46 [45] Jonsdottir H. Life patterns of people with chronic obstructive pulmonary  
47 disease: isolation and being closed in. *Nurs Sci Q* 1998;11:160-6.
- 48 [46] Leidy NK, Vernon M. Perspectives on patient-reported outcomes:  
49 content validity and qualitative research in a changing clinical trial  
50 environment. *Pharmacoeconomics* 2008;26(5):363-70.
- 51  
52  
53  
54  
55  
56  
57  
58  
59  
60



# Please wait...

If this message is not eventually replaced by the proper contents of the document, your PDF viewer may not be able to display this type of document.

You can upgrade to the latest version of Adobe Reader for Windows®, Mac, or Linux® by visiting <http://www.adobe.com/products/acrobat/readstep2.html>.

For more assistance with Adobe Reader visit <http://www.adobe.com/support/products/acrreader.html>.

Windows is either a registered trademark or a trademark of Microsoft Corporation in the United States and/or other countries. Mac is a trademark of Apple Inc., registered in the United States and other countries. Linux is the registered trademark of Linus Torvalds in the U.S. and other countries.

# Please wait...

If this message is not eventually replaced by the proper contents of the document, your PDF viewer may not be able to display this type of document.

You can upgrade to the latest version of Adobe Reader for Windows®, Mac, or Linux® by visiting <http://www.adobe.com/products/acrobat/readstep2.html>.

For more assistance with Adobe Reader visit <http://www.adobe.com/support/products/acrreader.html>.

Windows is either a registered trademark or a trademark of Microsoft Corporation in the United States and/or other countries. Mac is a trademark of Apple Inc., registered in the United States and other countries. Linux is the registered trademark of Linus Torvalds in the U.S. and other countries.

# Please wait...

If this message is not eventually replaced by the proper contents of the document, your PDF viewer may not be able to display this type of document.

You can upgrade to the latest version of Adobe Reader for Windows®, Mac, or Linux® by visiting [http://www.adobe.com/go/reader\\_download](http://www.adobe.com/go/reader_download).

For more assistance with Adobe Reader visit <http://www.adobe.com/go/acrreader>.

Windows is either a registered trademark or a trademark of Microsoft Corporation in the United States and/or other countries. Mac is a trademark of Apple Inc., registered in the United States and other countries. Linux is the registered trademark of Linus Torvalds in the U.S. and other countries.

To view the full contents of this document, you need a later version of the PDF viewer. You can upgrade to the latest version of Adobe Reader from [www.adobe.com/products/acrobat/readstep2.html](http://www.adobe.com/products/acrobat/readstep2.html)

For further support, go to [www.adobe.com/support/products/acrreader.html](http://www.adobe.com/support/products/acrreader.html)

# Please wait...

If this message is not eventually replaced by the proper contents of the document, your PDF viewer may not be able to display this type of document.

You can upgrade to the latest version of Adobe Reader for Windows®, Mac, or Linux® by visiting <http://www.adobe.com/products/acrobat/readstep2.html>.

For more assistance with Adobe Reader visit <http://www.adobe.com/support/products/acrreader.html>.

Windows is either a registered trademark or a trademark of Microsoft Corporation in the United States and/or other countries. Mac is a trademark of Apple Inc., registered in the United States and other countries. Linux is the registered trademark of Linus Torvalds in the U.S. and other countries.

# Please wait...

If this message is not eventually replaced by the proper contents of the document, your PDF viewer may not be able to display this type of document.

You can upgrade to the latest version of Adobe Reader for Windows®, Mac, or Linux® by visiting <http://www.adobe.com/products/acrobat/readstep2.html>.

For more assistance with Adobe Reader visit <http://www.adobe.com/support/products/acrreader.html>.

Windows is either a registered trademark or a trademark of Microsoft Corporation in the United States and/or other countries. Mac is a trademark of Apple Inc., registered in the United States and other countries. Linux is the registered trademark of Linus Torvalds in the U.S. and other countries.

# Please wait...

If this message is not eventually replaced by the proper contents of the document, your PDF viewer may not be able to display this type of document.

You can upgrade to the latest version of Adobe Reader for Windows®, Mac, or Linux® by visiting <http://www.adobe.com/products/acrobat/readstep2.html>.

For more assistance with Adobe Reader visit <http://www.adobe.com/support/products/acrreader.html>.

Windows is either a registered trademark or a trademark of Microsoft Corporation in the United States and/or other countries. Mac is a trademark of Apple Inc., registered in the United States and other countries. Linux is the registered trademark of Linus Torvalds in the U.S. and other countries.

# Please wait...

If this message is not eventually replaced by the proper contents of the document, your PDF viewer may not be able to display this type of document.

You can upgrade to the latest version of Adobe Reader for Windows®, Mac, or Linux® by visiting <http://www.adobe.com/products/acrobat/readstep2.html>.

For more assistance with Adobe Reader visit <http://www.adobe.com/support/products/acrreader.html>.

Windows is either a registered trademark or a trademark of Microsoft Corporation in the United States and/or other countries. Mac is a trademark of Apple Inc., registered in the United States and other countries. Linux is the registered trademark of Linus Torvalds in the U.S. and other countries.



1  
2  
3 **Shortness of Breath with Daily Activities questionnaire: validation and**  
4 **responder thresholds in patients with chronic obstructive pulmonary disease**  
5  
6  
7

8 **Michael L Watkins,<sup>1</sup> Teresa K Wilcox,<sup>2</sup> Maggie Tabberer,<sup>3</sup> Jean M Brooks,<sup>3</sup>**  
9  
10 **James F Donohue,<sup>4</sup> Antonio Anzueto,<sup>5</sup> Wen-Hung Chen,<sup>2</sup> Courtney Crim<sup>1</sup>**  
11

12  
13  
14 <sup>1</sup>Respiratory Medicines Development Center, GlaxoSmithKline, Research Triangle Park,  
15 North Carolina, USA  
16

17  
18 <sup>2</sup>[Evidera \(formerly United BioSource Corporation\)](#), Bethesda, Maryland, USA  
19

20 <sup>3</sup>Respiratory Medicines Development Centre, GlaxoSmithKline, Uxbridge, UK  
21

22 <sup>4</sup>Division of Pulmonary and Critical Care Medicine, University of North Carolina, Chapel Hill,  
23 North Carolina, USA  
24

25 <sup>5</sup>South Texas Veterans Health Care System and University of Texas Health Science Center,  
26 San Antonio, Texas, USA  
27  
28  
29

30  
31 **Word counts etc**  
32

33 Total: [41153876](#) words (4000 recommended)  
34

35 Abstract: 298 words (300 permitted)  
36

37 Figure/tables: 1 figure, 3 tables (max of 5 recommended)  
38  
39

40 **Running header:** Validation of SOBDA questionnaire  
41  
42

43 **Correspondence to:**  
44

45 Michael Watkins, Respiratory Medicines Development Center, GlaxoSmithKline, Research  
46 Triangle Park, NC 27613, United States. E-mail: [michael.l.watkins@gsk.com](mailto:michael.l.watkins@gsk.com).  
47

48 Tel. +1 (919) 483-0449. Fax. +1 (919) 483-4300  
49  
50  
51

52  
53 **Running title:** Validation of SOBDA Questionnaire  
54

55 **Key words:** dyspnoea, breathlessness, patient-reported outcomes, COPD  
56  
57  
58  
59  
60

## ABSTRACT

**Objectives:** To test the reliability, validity and responsiveness of the 13-item Shortness of Breath with Daily Activities (SOBDA) questionnaire, and determine the threshold for response and minimal important difference (MID).

**Design:** Six-week, randomised, double-blind, placebo-controlled study.

**Setting:** Forty centres in the United States between 29 Oct 2009 and 1 July 2010.

**Primary and secondary outcome measures:** 547 patients with chronic obstructive pulmonary disease (COPD) were enrolled and 418 entered the 2-week run-in period. Data from the run-in period were collected to test internal consistency, test-retest reliability, convergent validity, and known-groups validity of the SOBDA. 366 patients were randomised 2:2:1 to fluticasone propionate/salmeterol 250/50 µg, salmeterol 50 µg, or placebo, twice daily. Results from the SOBDA questionnaire, Patient Global Assessment of Change Question, modified Medical Research Council Dyspnoea Scale (mMRC), Clinician Global Impression of Dyspnoea Severity (CGI-S), Clinician Global Impression of Change Question, and Chronic Respiratory Disease Questionnaire self-administered standardised version (CRQ-SAS) were evaluated; spirometry and safety parameters were measured. Study endpoints were selected to investigate cross-sectional and longitudinal validity of the SOBDA in relation to clinical criteria.

**Results:** Internal consistency of the SOBDA questionnaire (Cronbach alpha) was 0.89. Test-retest reliability (intraclass correlation) was 0.94. SOBDA weekly scores correlated with patient-reported and clinician-reported mMRC, CGI-S, and CRQ-SAS dyspnoea domain scores (0.29, 0.24, 0.24, -0.68, respectively). SOBDA weekly scores differentiated responders and non-responders as rated by patients and clinicians. Anchor- and supportive distribution-based analyses produced a range of potential values for the threshold for responders and MID.

1  
2  
3 **Conclusions:** The 13-item SOBDA questionnaire is reliable, valid, and responsive to  
4 change in patients with COPD. Using anchor-based methods, the proposed responder  
5 threshold is a –0.1 to –0.2 score change. A specific threshold value will be identified as more  
6 data are generated from future clinical trials.  
7  
8  
9

10  
11 **Trial registration:** NCT00984659; **GlaxoSmithKline study number:** ASQ112989  
12  
13

14  
15 **Word count of the abstract:** 298  
16  
17  
18  
19  
20  
21  
22  
23  
24  
25  
26  
27  
28  
29  
30  
31  
32  
33  
34  
35  
36  
37  
38  
39  
40  
41  
42  
43  
44  
45  
46  
47  
48  
49  
50  
51  
52  
53  
54  
55  
56  
57  
58  
59  
60

## ARTICLE SUMMARY

### Article focus

- Dyspnoea, often referred to as 'shortness of breath' or 'breathlessness', is commonly associated with decreases in functional status, quality of life, and other disabilities.
- The patient-reported outcome questionnaire was developed to specifically assess Shortness of Breath with Daily Activities (SOBDA) in patients with chronic obstructive pulmonary disease (COPD).
- An initial non-interventional study (A2-4398-003)<sup>1</sup> showed internal consistency and test-retest reliability. The current study (NCT00984659; ASQ112989) was conducted to reconfirm the reliability, validity, and responsiveness of the 13-item SOBDA questionnaire and to determine the threshold for response and the minimal important difference of the final questionnaire.

### Key messages

- The current study demonstrates that the 13-item SOBDA questionnaire is reliable, valid, and responsive to change in patients with COPD. The proposed responder threshold is a -0.1 to -0.2 score change with a specific threshold value to be determined as more data are generated from future clinical trials.

### Strengths and limitations of the study

- This study reconfirmed the initial psychometric validation observed in the non-interventional study (A2-4398-003).<sup>1</sup>
- Only patients with modified Medical Research Council Dyspnoea Scale  $\geq 2$  were included in the patient population, thereby restricting the shortness of breath severity range. Approximately half of the patients also did not answer the last Patient Global

1  
2  
3 Assessment of Change question. These limitations may have affected some of the  
4  
5 validity assessments.  
6  
7  
8  
9  
10  
11  
12  
13  
14  
15  
16  
17  
18  
19  
20  
21  
22  
23  
24  
25  
26  
27  
28  
29  
30  
31  
32  
33  
34  
35  
36  
37  
38  
39  
40  
41  
42  
43  
44  
45  
46  
47  
48  
49  
50  
51  
52  
53  
54  
55  
56  
57  
58  
59  
60

For peer review only

## INTRODUCTION

Dyspnoea, sometimes referred to as 'shortness of breath' or 'breathlessness' by the patient, is a common and significant complaint of patients with chronic obstructive pulmonary disease (COPD). In one survey of 3,000 COPD patients, 56% were found to have breathlessness during normal physical activities and 42% reported breathlessness while doing household chores.<sup>2</sup>

Capturing the effect of a treatment intervention on dyspnoea from the patient's perspective is therefore an important objective in order to demonstrate treatment effectiveness. While patient-reported aspects of COPD have been assessed using currently available instruments, most do not adequately address the concept of dyspnoea in patients with COPD for use in clinical trials, due to limited assessment of psychometric properties during development of the questionnaire or inconsistent clinical validity in use. In addition, there are no currently available instruments for assessing COPD-related dyspnoea that can support a specific label claim for a medicinal product in the United States.

The Shortness of Breath with Daily Activities (SOBDA) questionnaire is a daily diary questionnaire developed to quantify a patient's perception of dyspnoea related to daily activities and how this changes over time during treatment.<sup>1,3</sup> Development of the SOBDA questionnaire followed the Patient-Reported Outcomes Guidance for drug development issued by the US Food and Drug Administration<sup>4</sup> and included the creation of an endpoint rationale and the development of a conceptual framework.<sup>3</sup> Qualitative research, including individual interviews and patient focus groups, was used to develop potential questions (item pool), item format and response options, which were subject to clinical and translation expert review. Further cognitive interviews with patients were conducted to test content validity.<sup>3</sup> The item pool was tested in a non-interventional study, and the number of items was appropriately reduced to produce the final SOBDA questionnaire.<sup>1</sup> Initial psychometric

1  
2  
3 validation from this non-interventional study showed excellent internal consistency and test-  
4  
5 retest reliability.<sup>1</sup>  
6  
7

8 The objectives of this study were to (i) confirm the reliability and validity, (ii) evaluate the  
9  
10 responsiveness, (iii) define the threshold for responder and also the minimal important  
11  
12 difference (MID) of the final SOBDA questionnaire in patients with COPD. The threshold for  
13  
14 response was established by comparing SOBDA change scores for responders and non-  
15  
16 responders, defined according to a range of established patient- and clinician-completed  
17  
18 assessments. The study included active treatments to ensure some patients would be  
19  
20 classified as 'responders' on the established clinical measures.  
21  
22

## 23 **METHODS**

### 24 **Patients**

25  
26  
27 Male and female patients  $\geq 40$  years of age with an established clinical history of COPD in  
28  
29 accordance with the American Thoracic Society/European Respiratory Society definitions<sup>5</sup>  
30  
31 were recruited. At screening, patients were required to have a post-salbutamol forced  
32  
33 expiratory volume in one second ( $FEV_{1}$ )  $\leq 70\%$  of predicted normal and  $FEV_{1}$  /forced vital  
34  
35 capacity (FVC) ratio of  $< 0.70$ ; to be a current or former smoker with a history of at least 10  
36  
37 pack-years; and to demonstrate evidence of dyspnoea as assessed by a patient-reported  
38  
39 modified Medical Research Council Dyspnoea Scale (mMRC) score  $\geq 2$ . The study protocol  
40  
41 was institutional review board-approved and all patients provided written informed consent  
42  
43 before enrolment.  
44  
45  
46  
47  
48

### 49 **Study design**

50  
51  
52 This randomised, double-blind, placebo-controlled study was conducted at 40 centres in the  
53  
54 USA from 29 Oct 2009 to 01 July 2010 (Trial registration: NCT00984659; GlaxoSmithKline  
55  
56 study number: ASQ112989). Patients attended three clinic visits. At screening visit 1, eligible  
57  
58  
59  
60

1  
2  
3 patients entered a 2-week run-in period during which short-acting bronchodilator rescue  
4 medications (salbutamol and/or ipratropium) were permitted. At visit 2, eligible patients were  
5 randomised (2:2:1) to receive fluticasone propionate/salmeterol combination (FSC)  
6  
7 250/50 µg, salmeterol (SAL) 50 µg or placebo, all administered twice daily via a DISKUS®  
8  
9 inhaler, for 6 weeks. The FSC and SAL active treatments were included to potentially induce  
10  
11 a change in the degree of the patients' symptoms of dyspnoea, which would allow the  
12  
13 responsiveness of the SOBDA questionnaire to be assessed. The final dose of study  
14  
15 medication was taken on the day before visit 3 (week 6). In the event of a patient not  
16  
17 completing the week 6 visit, attempts were made for the patient to attend an early withdrawal  
18  
19 visit that included the week 6 assessments.  
20  
21  
22  
23

24 All non-COPD medications, including pre-existing selective beta-blocker therapy, could be  
25 continued if their dose remained constant. Concurrent use of inhaled or oral corticosteroids,  
26 long-term oxygen therapy, long-acting bronchodilators, and theophylline were exclusion  
27  
28 criteria within the study protocol.  
29  
30  
31  
32

### 33 **Measurements and assessments**

34  
35  
36 Patient-completed measures: SOBDA questionnaire

37  
38  
39 The 13-item SOBDA questionnaire (box 1) was completed on an electronic diary (e-diary)  
40 each evening immediately before bedtime, which allowed the patient to reflect on and  
41 capture the current day's activities.<sup>13</sup> All items followed the same format: 'How breathless  
42 were you when [completing the specified activity]?' Individual item responses are completed  
43 on a scale from 'not at all' to 'so short of breath I did not do the activity'. Items 1–4, 6, 8, 9,  
44 11, and 12 are scored from 1 ('not at all'), 2 ('slightly'), 3 ('moderately'), to 4 ('severely' or 'so  
45 severely that I did not do the activity today'), and items 5, 7, 10, and 13 are scored from 1  
46 ('not at all' and 'slightly'), 3 ('moderately'), and 4 ('severely' or 'so severely that I did not do  
47 the activity today'). Patients were also given an option of 'did not do' for activities they did not  
48 perform for other reasons. In scoring the questionnaire, these responses were regarded as  
49  
50  
51  
52  
53  
54  
55  
56  
57  
58  
59  
60



1  
2  
3 missing data. Due to the design of the e-diary, it was not possible for patients to skip  
4 individual questions within the diary although a full day of data could be missed if the patient  
5 did not access the diary within the time window allowed.  
6  
7

8  
9  
10 Analyses were conducted aggregating daily data over weekly time periods to account for  
11 day-to-day variability and the fact that not all activities were performed every day. A daily  
12 SOBDA score was computed across the 13 items as a mean score ranging from 1 to 4, if at  
13 least 7 items had non-missing scores. A weekly mean SOBDA score was then computed as  
14 the mean of the daily mean scores in a 7-day period, if at least 4 out of 7 days had non-  
15 missing SOBDA daily scores. The baseline SOBDA weekly score for each patient was  
16 calculated as the mean value during the week before randomisation.  
17  
18  
19  
20  
21  
22  
23

#### 24 Patient-completed measures: other

25  
26  
27  
28 Additional questions were completed via e-diary, daily or weekly. Daily questions included  
29 any form of contact with healthcare professionals, frequency of rescue medication use, and  
30 completion of a Global Assessment of Shortness of Breath question: 'Overall, were you short  
31 of breath during your activities today?' Patients responded to this question on a 5-point scale  
32 from '1=not at all' to '5=extremely'. Every 7 days, patients responded to a Patient Global  
33 Assessment of Change (PGAC) question that asked, 'Compared to last week (7 days ago),  
34 how was your shortness of breath today?' on a scale of '1=much worse' to '5=much better',  
35 with 3='no change'.  
36  
37  
38  
39  
40  
41  
42  
43  
44

45 Patients completed the mMRC at each clinic visit and the 20-item Chronic Respiratory  
46 Disease Questionnaire self-administered standardised version (CRQ-SAS) at visit 2 and  
47 week 6/early withdrawal.  
48  
49  
50

#### 51 Clinician-completed assessments

52  
53  
54  
55 A Clinician Global Impression of Dyspnoea Severity (CGI-S) question to assess dyspnoea  
56 severity on a scale of 1 (mild) to 4 (very severe) was completed at visit 2 and week 6/early  
57  
58  
59  
60

1  
2  
3 withdrawal. A Clinician Global Impression of Change (CGI-C) question to assess change in  
4 dyspnoea on a scale of 1 (much worse) to 5 (much better), with 3 being no change, was  
5 completed at week 6/early withdrawal. Clinicians rated the patient's dyspnoea on the 5-point  
6 mMRC scale at each clinic visit.  
7  
8  
9

## 10 Spirometry

11  
12 Spirometry (FEV<sub>1</sub> and FVC) was performed at all clinic visits after the questionnaires were  
13 completed. FEV<sub>1</sub> responders were defined as patients who had a change of ≥100 ml from  
14 visit 2 to week 6/early withdrawal, whereas FEV<sub>1</sub> non-responders were those patients with a  
15 change of <100 ml. Bronchodilator reversibility testing was also performed 30 min post-  
16 salbutamol (360 µg) at screening. Predicted FEV<sub>1</sub> values were calculated according to  
17 National Health and Nutrition Examination Survey III reference values.<sup>6</sup>  
18  
19  
20  
21  
22  
23  
24  
25  
26  
27

## 28 Safety

29 Safety was assessed by reported adverse events (AEs) and COPD exacerbations.  
30  
31  
32  
33

## 34 Statistical analyses

### 35 Sample size and powering

36  
37 Sample size calculations were based on evaluation of the responsiveness of the SOBDA  
38 questionnaire<sup>1,3</sup> and allowed for comparison of SOBDA change scores for responders and  
39 non-responders. Calculations assumed 90% power, a two-sided 5% significance level, and a  
40 standardised between-groups effect size of 0.5 (defined as the difference between  
41 responders and non-responders divided by the standard deviation of the difference). The  
42 sample size was increased to allow exploratory comparisons of SOBDA scores between  
43 treatment arms. Assuming 90% of randomised patients would provide sufficient data for this  
44 comparison and a randomisation ratio of 2:2:1, approximately 350 patients were planned for  
45 randomisation in order to provide 320 evaluable patients.  
46  
47  
48  
49  
50  
51  
52  
53  
54  
55  
56  
57  
58  
59  
60

1  
2  
3 Analyses for the internal consistency, test-retest reliability in a stable population, convergent  
4 validity, and known-groups validity were based upon the data collected from the run-in  
5 population. This population consisted of randomised and non-randomised patients who  
6 completed visit 2. The responsiveness to change of the SOBDA was based on data  
7 collected from the modified intent-to-treat (mITT) population, defined as all patients who  
8 were randomised to treatment and who received at least one dose of study drug, and  
9 analyzed according to the treatment actually received if this was different from the  
10 randomised treatment assignment.  
11  
12  
13  
14  
15  
16  
17  
18  
19

### 20 Internal consistency

21  
22  
23 To confirm the reliability and validity of the SOBDA questionnaire,<sup>1</sup> the internal consistency  
24 of the instrument was assessed and summary scores were compared with other endpoints  
25 collected.  
26  
27  
28  
29

30 The internal consistency of the SOBDA score was assessed for patients with a non-missing  
31 score for each item at day 1 of the run-in period by using Cronbach's formula for coefficient  
32 alpha (scale from 0 to 1.0); a value of 0.70 or greater is recognised as indicating acceptable  
33 internal consistency for an instrument.<sup>7</sup> Pearson's correlation and Intraclass correlation  
34 coefficient (ICC) were used to evaluate test-retest reliability, comparing SOBDA weekly  
35 scores for patients who reported no change on their weekly PGAC assessment during  
36 weeks 1 and 2 of the run-in period.  
37  
38  
39  
40  
41  
42  
43  
44

### 45 Convergent and known-groups validity

46  
47  
48  
49 SOBDA weekly scores were compared with other relevant study measures to establish the  
50 convergent and known-groups validity of the instrument. Convergent validity was assessed  
51 by examining the Spearman rank order correlation coefficient between baseline SOBDA  
52 weekly score and both mMRC (patient and clinician) ratings and CGI-S ratings at visit 2. The  
53 Pearson's correlation coefficient between the baseline SOBDA weekly scores and the  
54  
55  
56  
57  
58  
59  
60

1  
2  
3 CRQ-SAS dyspnoea domain score at visit 2 were also assessed. Known-groups validity,  
4 demonstrating that groups of patients who are known to be different report different SOBDA  
5 scores, was assessed by comparisons of SOBDA weekly scores between groups of patients  
6 based on mMRC (patient and clinician) ratings and CGI-S ratings collected at visit 2 using  
7 analysis of covariance (ANCOVA) models adjusted for age, gender, and FEV<sub>1</sub> % predicted  
8 measured during the screening visit.  
9  
10  
11  
12  
13

#### Responsiveness Threshold for responsiveness and MID

14  
15  
16 Responsiveness of the SOBDA questionnaire was assessed by comparing score changes  
17 between responders and non-responders on the PGAC, CGI-C, CRQ-SAS dyspnoea  
18 domain, and mMRC. Responders by PGAC and CGI-C were defined as defined as patients  
19 with a rating of 'better' or 'much better', and non-responders were defined as defined as  
20 patients with a response of 'much worse,' 'worse' or 'no change', on their respective scales.  
21 Responders by CGI-C were defined as patients with a rating of 'better' or 'much better', and  
22 non-responders were defined as patients with a response of 'much worse,' 'worse' or 'no  
23 change'. A CRQ-SAS dyspnoea domain responder was defined as a patient with a score  
24 increase of 0.5 units or more between visit 2 and week 6/early withdrawal, and a non-  
25 responder was defined as a patient who had a decrease in score, or an increase of less than  
26 0.5 units. A responder by mMRC was defined as a patient who had a score decrease of 1  
27 unit or more between visit 2 and week 6/early withdrawal, and a non-responder was defined  
28 as a patient who had the same score or an increase in score.  
29  
30  
31  
32  
33  
34  
35  
36  
37  
38  
39  
40  
41  
42  
43  
44  
45

46 Changes from the previous week to the current week's SOBDA score during the six-week  
47 study treatment period were compared for responders and non-responders (defined  
48 according to the corresponding weekly PGAC assessment) were analyzed for  
49 responsiveness using ANCOVA, adjusted for age, gender and baseline SOBDA weekly  
50 score. In addition, changes in mean SOBDA scores during the last week of treatment were  
51 compared for in-responders and non-responders based on the PGAC, CGI-C, CRQ-SAS  
52  
53  
54  
55  
56  
57  
58  
59  
60

1  
2  
3 dyspnoea domain, clinician-completed mMRC and patient-completed mMRC were analyzed  
4  
5 using ANCOVA adjusted for age, sex, and the baseline SOBDA weekly score. Evaluation  
6  
7 was done by Responsiveness of the SOBDA was evaluated using the differences in weekly  
8  
9 change score between PGAC responders and non-responders as anchors, as well as  
10  
11 comparisons of the changes in SOBDA weekly scores from baseline to the last week of  
12  
13 treatment for PGAC, CGI-C, CRQ-SAS dyspnoea domain, and patient- and clinician-  
14  
15 reported mMRC responders and non-responders, using ANCOVA adjusted for age, gender  
16  
17 and baseline SOBDA weekly score.

### 20 Defining the threshold for SOBDA responders and MID

21  
22  
23 A preliminary MID for SOBDA mean score change within a subject was also  
24  
25 considered determined. This the threshold for SOBDA response to allow eds comparison of  
26  
27 proportions of responders in different intervention groups or treatment categories. Anchor-  
28  
29 based methods and examination of the Cumulative proportions of responders and non-  
30  
31 responders using the PGAC, CGI-C, and CRQ-SAS dyspnoea domain scores were used to  
32  
33 establish the threshold for SOBDA responders and the MID. A preliminary MID for SOBDA  
34  
35 mean score changes within a subject was also considered the threshold for SOBDA  
36  
37 responders to allow comparison of proportions of responders in different categories by  
38  
39 calculating SOBDA weekly change scores (for PGAC) and changes in SOBDA weekly  
40  
41 scores from baseline to the last week of treatment (for PGAC, CGI-C, CRQ-SAS dyspnoea  
42  
43 domain, and FEV<sub>1</sub>) in the response category or pre-specified grouping of 'better' for each  
44  
45 anchor. Cumulative distribution plots based on these anchors were also used to determine  
46  
47 the MID. distribution plots based on these anchors were also used to determine the MID;  
48  
49 PGAC, CGI-C, and CRQ-SAS dyspnoea domain scores were included in the analysis,  
50  
51 however, mMRC was not included

52  
53  
54  
55 Post-hoc supportive analyses using distribution-based approaches were also conducted  
56  
57 after completion of the *a priori* specified anchor-based analyses to further supplement  
58  
59  
60

1  
2  
3 estimation of a responder threshold. A method described by Revicki and associates<sup>8</sup> was  
4 used to estimate the response threshold by calculating 0.2 and 0.3 times the standard  
5 deviation of the SOBDA scores at baseline. In addition, thresholds were calculated by the  
6 standard error of measurements method.<sup>9</sup>

7  
8  
9  
10  
11 ~~Responders by PGAC were defined as patients with a rating of 'better' or 'much better', and~~  
12 ~~non-responders were defined as patients with a response of 'much worse,' 'worse' or 'no~~  
13 ~~change', on their respective scales. Responders by CGI-C were defined as patients with a~~  
14 ~~rating of 'better' or 'much better', and non-responders were defined as patients with a~~  
15 ~~response of 'much worse,' 'worse' or 'no change'. A CRQ-SAS dyspnoea domain responder~~  
16 ~~was defined as a patient with a score increase of 0.5 units or more between visit 2 and week~~  
17 ~~6/early withdrawal, and a non-responder was defined as a patient who had a decrease in~~  
18 ~~score, or an increase of less than 0.5 units. A responder by mMRC was defined as a patient~~  
19 ~~who had a score decrease of 1 unit or more between visit 2 and week 6/early withdrawal,~~  
20 ~~and a non-responder was defined as a patient who had the same score or an increase in~~  
21 ~~score.~~

## 32 33 34 35 **RESULTS**

36  
37  
38  
39 A total of 547 patients were screened and 418 completed both week -2 (screening visit 1)  
40 and week 0 (randomisation, visit 2) assessments; 52 patients were not eligible for  
41 randomisation. 366 patients met inclusion criteria and were randomised; however, one  
42 patient refused to take study medication, thus 365 patients received treatment and were  
43 included in the mITT (figure 1). Patients were predominantly white (90%), male (57%) with a  
44 mean age of 61.1 years (standard deviation, 9.7 years) and a mean body mass index of 28.3  
45 kg/m<sup>2</sup> (table 1). The majority (62%) of patients were current smokers with an extensive  
46 smoking history (mean pack-years, 54.9). The mean post-salbutamol % predicted FEV<sub>1</sub> was  
47 49.9%, indicative of a population with severe airflow obstruction.  
48  
49  
50  
51  
52  
53  
54  
55  
56  
57  
58  
59  
60

1  
2  
3 A total of 29 patients withdrew from the study (FSC 9%; SAL 7%; placebo 8%), 13 because  
4 of an AE (FSC 5%; SAL 2%; placebo 4%).  
5  
6

## 7 **Reliability and validity**

### 8 **Internal consistency**

9  
10  
11  
12  
13  
14 Cronbach's alpha value for the SOBDA was 0.89 (n=344). Test-retest reliability was  
15 assessed between weeks 1 and 2 of the run-in period for the 152 patients reporting no  
16 change on the second weekly PGAC assessment: Pearson's correlation coefficients and  
17 ICC were both 0.94, with a mean difference between weeks 1 and 2 of 0.01 on the 4-point  
18 SOBDA scale.  
19  
20  
21  
22  
23

### 24 **Convergent validity**

25  
26  
27  
28  
29 The relationship of SOBDA weekly scores to patient-reported and clinical assessments of  
30 dyspnoea severity or constructs hypothetically related to dyspnoea severity was examined to  
31 assess convergent validity. Spearman rank-order correlations between baseline SOBDA  
32 weekly scores and mMRC scores were 0.29 (patient-reported) and 0.24 (clinician-reported),  
33 and was 0.24 for CGI-S. Pearson's correlation between baseline SOBDA weekly scores and  
34 the CRQ-SAS dyspnoea domain score was -0.68 (higher scores in CRQ-SAS, contrary to  
35 SOBDA, indicate less dyspnoea, hence the correlation is negative).  
36  
37  
38  
39  
40  
41  
42

### 43 **Known-groups validity**

44  
45  
46  
47 Known-groups validity was evaluated by determining the extent to which baseline SOBDA  
48 weekly scores differentiated between patients with varying levels of dyspnoea severity as  
49 rated on the patient- and clinician-reported mMRC and CGI-S collected at visit 2. Least-  
50 squares mean SOBDA weekly scores were increased as CGI-S and mMRC clinician/patient  
51 ratings increased (table 2).  
52  
53  
54  
55  
56  
57  
58  
59  
60

## Responsiveness

SOBDA weekly scores were lower in PGAC responders than in non-responders, indicating less dyspnoea with daily activities. Differences between SOBDA weekly change scores for PGAC responders and non-responders were statistically significant for each weekly comparison with the exception of week 6 (table 3a).

Changes in SOBDA weekly score between baseline and the last treatment week were statistically significantly larger for CGI-C and CRQ-SAS dyspnoea domain responders than for non-responders ( $p < 0.001$ ). This was not seen with the patient- or clinician-completed mMRC or PGAC defined responders, although changes in last treatment week SOBDA scores were numerically larger for responders versus non-responders (table 3b).

### Threshold for SOBDA responders and MID

Patients classified as 'better' based on the CGI-C, CRQ-SAS dyspnoea domain (change of  $>0$  to 0.5 units), or FEV<sub>1</sub> (change of  $>50$  to  $<100$  ml) had a mean change in SOBDA score of  $-0.25$ ,  $-0.13$ , or  $-0.16$ , respectively, at the last treatment week compared with baseline.

Patients who rated their dyspnoea as 'better' on the PGAC assessments had a mean change in SOBDA score of  $-0.26$  at week 1,  $-0.08$  at weeks 2, 3 and 5,  $-0.10$  at week 4, and  $-0.05$  at week 6.

Using the method described by Revicki and associates,<sup>8</sup> thresholds of  $-0.14$  and  $-0.21$  were calculated using 0.2 and 0.3 times the standard deviation of the SOBDA scores at baseline. In addition, a similar threshold of  $-0.17$  was identified by the standard error of measurements method.<sup>9</sup>



## Exploratory efficacy analyses

### SOBDA treatment group differences

After adjusting for age, sex, and SOBDA baseline score, the difference between FSC and placebo was  $-0.09$  (95% confidence interval [CI]:  $-0.23, 0.05$ ) and between SAL and placebo was  $0.03$  (95% CI:  $-0.11, 0.16$ ).

### CRQ-SAS

The greatest mean changes for dyspnoea and fatigue were observed in the FSC group (0.4 and 0.3, respectively). The mean changes from baseline in emotional function were similar between placebo and the two treatment groups (0.2 and 0.1), as were those for mastery (0.2 for placebo, 0.3 for SAL, and 0.4 for FSC). SAL and FSC groups reported a change of 'better' or 'much better' (56% and 65%, respectively) compared with the placebo group (53%). Thirty-four percent of patients receiving placebo were rated as responders, whereas 37% of SAL patients and 46% of FSC patients were responders [using this measure](#).

### Spirometry

The mean change in FEV<sub>1</sub> in the placebo, SAL, and FSC groups were 1 ml, 61 ml, and 138 ml, respectively. Forty-nine percent of patients receiving FSC were considered responders, while 38% of patients receiving SAL and 25% of patients receiving placebo were responders. The majority of patients in the FSC (62%) and SAL (55%) groups reported a change of 'better' or 'much better', and less than half of patients in the placebo group (38%) reported this change.

### Safety

AEs were reported for 37 patients (27%) in the FSC group, 34 patients (23%) in the SAL group, and 14 patients (19%) in the placebo group. COPD exacerbation, dyspnoea,

1  
2  
3 headache, and respiratory tract infection were the most commonly reported AEs with no  
4  
5 other individual AEs occurring in  $\geq 3\%$  of patients in any group.  
6

7  
8 Twelve patients experienced serious AEs (SAEs) (FSC, 3 [2%] patients; SAL, 5 [3%]  
9  
10 patients; placebo, 4 [5%] patients); three of these SAEs were considered possibly related to  
11  
12 study medication (SAL, 1 patient; placebo, 2 patients). One fatal SAE of respiratory failure  
13  
14 occurred for a patient receiving FSC during the study, but was not considered related to FSC  
15  
16 treatment by the study investigator.  
17

## 18 19 **DISCUSSION**

20  
21  
22 The SOBDA was developed to address the need for a robust and psychometrically sound  
23  
24 patient-reported outcomes questionnaire for use in clinical research that would specifically  
25  
26 capture dyspnoea experienced with daily activities as perceived by patients with COPD.  
27

28 Available questionnaires have limited assessment of psychometric properties, inconsistent  
29  
30 clinical validity, and/or are not dyspnoea-specific. The CRQ-SAS<sup>108–120</sup> and SGRQ<sup>134 142</sup>  
31  
32 questionnaires, for example, measure multiple dimensions that are much broader than  
33  
34 dyspnoea with activity, which is the specific aim of the current SOBDA questionnaire. The  
35  
36 mMRC questionnaire has been used to discriminate between levels of dyspnoea associated  
37  
38 with exercise, but shows very limited response to change in clinical trials due to the limited  
39  
40 number of categories for response.  
41

42  
43  
44 This study confirms that the SOBDA questionnaire has sound psychometric properties.  
45  
46 SOBDA weekly scores had an internal consistency reliability Cronbach's alpha value of 0.89,  
47  
48 which surpassed the established threshold goal of  $>0.7$ .<sup>7</sup> SOBDA also had good test-retest  
49  
50 reliability (ICC=0.94), exceeding the threshold goal of  $>0.60$ , in patients reporting no change  
51  
52 in their breathlessness as measured by the PGAC.<sup>153</sup>  
53

54  
55 The convergent validity assessed through Spearman rank order correlations was  
56  
57 reasonable, although lower than expected for the CGI-C and mMRC. This may have been  
58  
59  
60

1  
2  
3 due to the narrow range of responses given by clinicians: most patients were rated as '2' or  
4 '3' by clinicians on both scales. The narrow range of clinician mMRC ratings reflect the  
5 inclusion criteria requiring patients to have an mMRC  $\geq 2$  at study entry. The CRQ-SAS  
6 dyspnoea scale, which measures the concept most similar to the SOBDA, showed the  
7 highest correlation with the SOBDA questionnaire and is supportive of the SOBDA's  
8 construct validity.  
9

10  
11 SOBDA weekly scores in the study population demonstrated good known-groups validity  
12 through a series of analyses. The scores differentiated between dyspnoea severity as rated  
13 by both clinicians and patients. As expected, discrimination based on patient ratings was  
14 better than that based on clinician ratings. Known-groups validity was also confirmed when  
15 comparing the SOBDA with the CGI-S.  
16

17  
18 Assessment of responsiveness of the SOBDA questionnaire was conducted independent of  
19 treatment allocation. Good separation in SOBDA weekly scores was observed between the  
20 PGAC groups at day 8 as indicated by significant differences between scores for responders  
21 and non-responders. Less separation was observed between PGAC groups throughout the  
22 later weeks of the 6-week treatment period compared with week 1. This diminished  
23 separation may be partially explained by the way the PGAC score was derived, i.e., each  
24 week's PGAC score was based on scores from the previous week. This is also not an  
25 unexpected trend as any improvement in dyspnoea would be expected to occur or be  
26 perceptible to patients soon after initiating therapy, with continued improvement being less  
27 noticeable over time. The particularly diminished responsiveness observed at week 6 was  
28 potentially due to approximately half of the patients not providing a response to the PGAC at  
29 day 43 or at the last visit. Changes from baseline in SOBDA last treatment week scores  
30 were statistically significant between responders and non-responders using the CGI-C and  
31 CRQ-SAS dyspnoea domain, but not the mMRC. This again may be due to the narrow range  
32 of mMRC ratings.  
33  
34  
35  
36  
37  
38  
39  
40  
41  
42  
43  
44  
45  
46  
47  
48  
49  
50  
51  
52  
53  
54  
55  
56  
57  
58  
59  
60

1  
2  
3 The thresholds for SOBDA responders and the MID were explored using anchor- and  
4 distribution-based methods. Anchor-based methods were used to establish a preliminary  
5 MID range for SOBDA mean score changes within a patient, which would also be  
6 considered as the threshold for SOBDA responders to allow comparison of proportions of  
7 responders in different categories (e.g. different interventions or treatments). The evaluation  
8 of data around the MID was based on the change from baseline in the SOBDA score for  
9 those patients who endorsed or had the clinician endorse for them (depending on the  
10 anchor), the response category 'better' for the global assessments or the pre-specified  
11 grouping of meaningful improvement on other measures (PGAC, CGI-C, CRQ-SAS, and  
12 FEV<sub>1</sub>). Based on these anchors, a preliminary response threshold for the SOBDA  
13 questionnaire is a -0.1 to -0.2 score change. This is further supported by distribution-based  
14 estimations of the MID using methods described by Revicki and Wyrwich.<sup>8 9</sup> ~~Similar~~  
15 ~~thresholds of -0.14 and -0.21 were calculated using 0.2 and 0.3 times the standard~~  
16 ~~deviation of the SOBDA scores at baseline, a method described by Revicki and associates.<sup>14</sup>~~  
17 ~~In addition, a similar threshold of -0.17 was identified by the standard error of~~  
18 ~~measurements method.<sup>15</sup>~~ Thus, a threshold of -0.1 to -0.2 for the score range of 1 to 4,  
19 supported by both anchor- and distribution-based methods, seems reasonable at this stage  
20 of questionnaire development. This MID estimation is also consistent in scale with that of the  
21 CRQ-SAS in which the MID is 0.5 on a 7-point Likert scale.<sup>16</sup>

22  
23  
24  
25  
26  
27  
28  
29  
30  
31  
32  
33  
34  
35  
36  
37  
38  
39  
40  
41  
42  
43 ~~Once an estimation of the MID was determined,~~ Exploratory analysis by treatment group  
44 ~~was conducted which~~ suggests eds that the proportion of patients crossing the -0.1 and -0.2  
45 thresholds was numerically greater for the SAL group compared with placebo, and  
46 numerically greater for the FSC group compared with the SAL group. As the study was  
47 designed only to validate the SOBDA, and cannot reliably demonstrate differences between  
48 treatment groups, these changes from baseline in SOBDA weekly score at last treatment  
49 can only be regarded as exploratory. Even after adjusting for age, gender, and baseline  
50  
51  
52  
53  
54  
55  
56  
57  
58  
59  
60

1  
2  
3 SOBDA weekly score, the mean change in score for each treatment group when compared  
4 with placebo did not meet the MID of  $-0.1$  or  $-0.2$ .  
5  
6

7  
8 This study had some limitations. Only patients with mMRC  $\geq 2$  were included in the study,  
9 which restricted the ranges of the dyspnoea severity. The effects of exacerbation and  
10 possible cultural differences on the study results were not evaluated. Finally, approximately  
11 half of the patients did not answer the last PGAC question despite completing other final visit  
12 assessments. These limitations could have had effect on some of the results of our study,  
13 although we do not feel that there would be any change to the overall conclusions.  
14  
15  
16  
17  
18  
19

20  
21 In summary, this study demonstrates that the 13-item SOBDA questionnaire is reliable, valid,  
22 and responsive to change in patients with COPD. At this stage of questionnaire  
23 development, a change score of  $-0.1$  to  $-0.2$  is the most appropriate estimation for  
24 determining a threshold for treatment response. A specific value will be identified as more  
25 data is generated from future clinical trials.  
26  
27  
28  
29  
30  
31

## 32 **ACKNOWLEDGEMENTS**

33  
34  
35  
36 Editorial support in the form of copyediting, editorial suggestions to draft versions of this  
37 paper, assembling tables and figures, collating author comments, fact checking, referencing,  
38 and graphic services was provided by Tara N Miller, PhD (Lyndhurst, NJ, USA), David  
39 Cutler, PhD and Lisa Moore, PhD (Macclesfield, UK) at Gardiner-Caldwell Communications.  
40  
41  
42  
43  
44 This support was funded by GlaxoSmithKline.  
45

## 46 **CONTRIBUTORS**

47  
48  
49 All authors contributed to drafting the article or revising it critically for important intellectual  
50 content, and all approved the final version to be published. MLW, TKW, MT, JMB and CC  
51 contributed to conception and design of the study, acquisition of data and analysis and  
52 interpretation of data. JFD, AA and W-HC contributed to acquisition of data and analysis and  
53 interpretation of data. MLW attests that the authors had access to all the study data, takes  
54  
55  
56  
57  
58  
59  
60

1  
2  
3 responsibility for the accuracy of the analysis, and had authority over manuscript preparation  
4  
5 and the decision to submit the manuscript for publication.  
6

## 7 8 COMPETING INTERESTS

9  
10 **Michael L Watkins, Maggie Tabberer, Jean M Brooks, and Courtney Crim** are  
11  
12 employees of, and own stock in, GlaxoSmithKline. **Teresa K Wilcox** and **Wen-Hung Chen**  
13  
14 are employees of the [Evidera \(formerly United BioSource Corporation\)](#). Funding to conduct  
15  
16 the study, data analysis and interpretation, and generation of the study report was provided  
17  
18 to [Evidera United BioSource Corporation](#) by GlaxoSmithKline. **James F Donohue** has  
19  
20 served as consultant to Ammirall, AstraZeneca, Boehringer Ingelheim, Dey, Elevation  
21  
22 Pharmaceuticals, Forest Laboratories, GlaxoSmithKline, Novartis, Pearl Pharmaceuticals,  
23  
24 Pfizer and Sunovion; and has received research grants from Boehringer Ingelheim,  
25  
26 GlaxoSmithKline and Novartis. **Antonio Anzueto** is an advisor, consultant, and speaker for  
27  
28 Boehringer Ingelheim, GlaxoSmithKline, Pfizer, Merck, Bayer-Schering Pharma, Dey  
29  
30 Pharma, Forest Laboratories and has investigational grants with the US National Heart,  
31  
32 Lung, and Blood Institute, GlaxoSmithKline, Lilly, Pfizer, and Pneuma Pharmaceuticals.  
33  
34

## 35 36 FUNDING

37  
38 The SOBDA development programme, including this ASQ112989 study, was funded by  
39  
40 GlaxoSmithKline. GlaxoSmithKline and [Evidera \(formerly United BioSource Corporation\)](#)  
41  
42 developed the instrument. GlaxoSmithKline had a role in study design, data collection and  
43  
44 analyses, decision to publish, and preparation of all study reporting including this  
45  
46 manuscript.  
47  
48  
49  
50  
51  
52  
53  
54  
55  
56  
57  
58  
59  
60

## REFERENCES

1. Wilcox TK, Chen W-H, Howard KA, et al. Item selection, reliability and validity of the Shortness of Breath with Daily Activities (SOBDA) questionnaire: a new outcome measure for evaluating dyspnoea in COPD. (Submitted 2013).
2. Rennard S, Decramer M, Calverley PM, et al. Impact of COPD in North America and Europe in 2000: subjects' perspective of Confronting COPD International Survey. *Eur Respir J* 2002;**20**:799–805.
3. Howard K, Berry P, Petrillo J, et al. Development of the shortness of breath with daily activities questionnaire (SOBDA). *Value in Health* 2012;**15**:1042–50.
4. Food and Drug Administration. Guidance for industry on patient-reported outcome measures: use in medical product development to support labeling claims. 2009. <http://www.fda.gov/downloads/Drugs/Guidances/UCM193282.pdf> (accessed 4 Apr 2013).
5. Celli BR, MacNee W, ATS/ERS Task Force. Standards for the diagnosis and treatment of patients with COPD: a summary of the ATS/ERS position paper. *Eur Respir J* 2004;**23**:932–46.
6. Hankinson JL, Odencrantz JR, Fedan KB. Spirometric reference values from a sample of the general US population. *Am J Resp Crit Care Med* 1999;**159**:179–87.
7. Nunnally JC, Bernstein IH. *Psychometric Theory*. 3rd ed. New York: McGraw-Hill, Inc.; 1994.
8. [Revicki DA, Cella D, Hays RD, et al. Responsiveness and minimal important differences for patient reported outcomes. \*Health Qual Life Outcomes\* 2006;\*\*4\*\*:70.](#)
9. [Wyrwich K, Tierney W, Wolinsky F. Further evidence supporting a SEM-based](#)

- [criterion for identifying meaningful intra-individual changes in health-related quality of life. J Clin Epidemiol 1999;52:861–73.](#)
10. Aaron SD, Vandemheen KL, Clinch JJ, et al. Measurement of short-term changes in dyspnoea and disease-specific quality of life following an acute COPD exacerbation. Chest 2002;121:688–96.
119. Aaron SD, Vandemheen KL, Hebert P, et al. Outpatient oral prednisone after emergency treatment of chronic obstructive pulmonary disease. N Engl J Med 2003;348:2618–25.
129. Parker CM, Voduc N, Aaron SD, et al. Physiological changes during symptom recovery from moderate exacerbations of COPD. Eur Respir J 2005;26:420–8.
134. Jones PW, Quirk FH, Baveystock CM. The St George's Respiratory Questionnaire. Respir Med 1991;85(Suppl. B):2531.
142. Jones PW, Quirk FH, Baveystock CM, et al. A self-complete measure of health status for chronic airflow limitation. The St George's Respiratory Questionnaire. Ann Rev Respir Dis 1992;145:1321–7.
153. Hays R, Anderson R, Revicki DA. Assessing reliability and validity of measurement in clinical trials. In: Staquet MJ, Hays RD, Fayers PM, eds. Quality of life assessment in clinical trials. New York, NY: Oxford University Press, 1998.167–182.
- ~~14. Revicki DA, Colla D, Hays RD, et al. Responsiveness and minimal important differences for patient reported outcomes. Health Qual Life Outcomes 2006;4:70.~~
- ~~15. Wyrwich K, Tierney W, Wolinsky F. Further evidence supporting a SEM based criterion for identifying meaningful intra-individual changes in health-related quality of life. J Clin Epidemiol 1999;52:861–73.~~



- 1  
2  
3 16. Schunemann HJ, Puhan M, Goldstein R, et al. Measurement properties and  
4 interpretability of the chronic respiratory disease questionnaire (CRQ). COPD  
5 2005;2:81–9.  
6  
7  
8  
9  
10  
11  
12  
13  
14  
15  
16  
17  
18  
19  
20  
21  
22  
23  
24  
25  
26  
27  
28  
29  
30  
31  
32  
33  
34  
35  
36  
37  
38  
39  
40  
41  
42  
43  
44  
45  
46  
47  
48  
49  
50  
51  
52  
53  
54  
55  
56  
57  
58  
59  
60

For peer review only

## TABLES AND FIGURES

**Table 1.** Demographic and clinical characteristics

|                                                            | Not Randomised | Placebo     | SC 250/50 µg | SAL 50 µg   | Total       |
|------------------------------------------------------------|----------------|-------------|--------------|-------------|-------------|
| N                                                          | 52             | 75          | 139          | 152         | 418         |
| Age, year (mean [SD])                                      | 63.8 (9.6)     | 62.8 (9.8)  | 60.2 (9.5)   | 60.1 (9.6)  | 61.1 (9.7)  |
| Male, n (%)                                                | 25 (48)        | 46 (61)     | 79 (57)      | 89 (59)     | 239 (57)    |
| White, n (%)                                               | 44 (85)        | 65 (87)     | 127 (91)     | 140 (92)    | 376 (90)    |
| Current smoker, n (%)                                      | 29 (57)        | 46 (61)     | 84 (60)      | 99 (65)     | 258 (62)    |
| Body mass index, mean (SD)                                 | 28.3 (6.9)     | 26.6 (6.1)  | 29.0 (7.3)   | 28.5 (6.2)  | 28.3 (6.7)  |
| Post-bronchodilator FEV <sub>1</sub> % predicted mean (SD) | 50.3 (15.1)    | 49.4 (13.1) | 49.5 (13.7)  | 50.2 (13.8) | 49.9 (13.8) |
| FEV <sub>1</sub> /FVC % (mean [SD])                        | 55.7 (35.2)    | 51.6 (11.4) | 53.7 (11.4)  | 52.2 (10.9) | 53.0 (16.1) |
| % Reversibility (mean [SD])                                | 8.6 (14.4)     | 16.7 (19.2) | 14.5 (18.5)  | 11.7 (13.9) | 13.1 (16.8) |

NOTE: 'Not randomised' column reflects those patients who completed visit 1 and 2 assessments but were not eligible to be randomised.

'Total' column reflects the run-in population, defined as patients who completed visits 1 and 2 including those who were not randomised.

FEV<sub>1</sub>, forced expiratory volume in 1 s; FSC, fluticasone propionate/salmeterol combination; FVC, forced vital capacity; SAL = salmeterol;

SD, standard deviation.

**Table 2.** Known groups validity: least-squares mean baseline SOBDA weekly score by mMRC and CGI-S response categories at visit 2

| Response categories | Patient-completed mMRC<br>n, LS mean <u>SOBDA score</u> (SE) | Clinician-completed mMRC<br>n, LS mean <u>SOBDA score</u> (SE) | CGI-S<br>n, LS mean <u>SOBDA score</u> (SE) |
|---------------------|--------------------------------------------------------------|----------------------------------------------------------------|---------------------------------------------|
| 0                   | n=12<br>1.92 (0.19)                                          | --                                                             | --                                          |
| 0-1                 | --                                                           | n=12<br>1.78 (0.20)                                            | --                                          |
| 1                   | n=103<br>1.94 (0.07)                                         | --                                                             | n=19<br>1.87 (0.16)                         |
| 2                   | n=138<br>2.20 (0.06)                                         | n=200<br>2.08 (0.05)                                           | n=236<br>2.11 (0.05)                        |
| 3                   | n=65<br>2.26 (0.08)                                          | n=117<br>2.28 (0.06)                                           | n=78<br>2.33 (0.08)                         |
| 4                   | n=22<br>2.73 (0.14)                                          | n=10<br>2.73 (0.22)                                            | n=5<br>2.72 (0.31)                          |

NOTE: Due to the small number of 0 and 1 responses in the clinician-completed mMRC, these two categories were combined.

SOBDA, Shortness of Breath with Daily Activities; mMRC, modified Medical Research Council dyspnoea rating scale; CGI-S, Clinician Global Impression of Dyspnoea Severity; SE, standard error.

**Table 3** (A) Change in SOBDA weekly score by PGAC responders; (B) Change in SOBDA last treatment week score by assessment responders at visit 3

**A)**

|                                       | Day 8        | Day 15       | Day 22       | Day 29       | Day 36       | Day 43        |
|---------------------------------------|--------------|--------------|--------------|--------------|--------------|---------------|
| PGAC responders (n)                   | 105          | 91           | 83           | 62           | 77           | 31            |
| PGAC non-responders (n)               | 188          | 212          | 216          | 223          | 200          | 88            |
| LS mean difference <u>in SOBDA</u>    | 0.24         | 0.12         | 0.11         | 0.11         | 0.13         | 0.06          |
| <u>scores</u> between groups (95% CI) | (0.18, 0.31) | (0.06, 0.19) | (0.06, 0.16) | (0.06, 0.17) | (0.08, 0.18) | (-0.03, 0.15) |
| p value*                              | <0.001       | <0.001       | <0.001       | <0.001       | <0.001       | NS            |

\* Comparison of SOBDA scores (non-responders minus responders) based on analysis of covariance adjusted for age, gender and previous week's SOBDA score.

CI, confidence interval; LS, least squares; NS, not significant; PGAC, Patient Global Assessment of Change; SOBDA, Shortness of Breath with Daily Activities

B)

|                                                                             | CGI-C                | CRQ-SAS<br>dyspnoea domain | Clinician-completed<br>mMRC | Patient-completed<br>mMRC | PGAC                  |
|-----------------------------------------------------------------------------|----------------------|----------------------------|-----------------------------|---------------------------|-----------------------|
| Responders (n)                                                              | 120                  | 117                        | 91                          | 92                        | 45                    |
| Non-responders (n)                                                          | 181                  | 184                        | 210                         | 209                       | 106                   |
| LS mean difference <u>in SOBDA</u><br><u>scores</u> between groups (95% CI) | 0.24<br>(0.14, 0.34) | 0.30<br>(0.21, 0.40)       | 0.03<br>(-0.08, 0.15)       | 0.08<br>(-0.02, 0.19)     | 0.08<br>(-0.07, 0.23) |
| p value*                                                                    | <0.001               | <0.001                     | NS                          | NS                        | NS                    |

\* Comparison of SOBDA scores (non-responders minus responders) based on Analysis of Covariance adjusted for age, gender and baseline SOBDA weekly score.

CGI-C, Clinician Global Impression of Change; CRQ-SAS, Chronic Respiratory Disease Questionnaire self-administered standardised version; CI, confidence interval; mMRC, modified Medical Research Council; LS, least squares; NS, not significant; PGAC, Patient Global Assessment of Change; SOBDA, Shortness of Breath with Daily Activities

1  
2  
3 **Box 1.** 13-Item SOBDA questionnaire  
4  
5  
6

7 **Figure 1.** Patient disposition  
8  
9

10 \*Patients who completed visits 1 and 2 including those not randomised.  
11

12 †Patients randomised to treatment and received at least one dose of the study drug. One additional  
13 patient was randomised but not treated.  
14

15 BID, twice daily; FSC, fluticasone propionate/salmeterol combination; mITT, modified intent-to-treat;  
16 SAL, salmeterol.  
17  
18  
19  
20  
21  
22  
23  
24  
25  
26  
27  
28  
29  
30  
31  
32  
33  
34  
35  
36  
37  
38  
39  
40  
41  
42  
43  
44  
45  
46  
47  
48  
49  
50  
51  
52  
53  
54  
55  
56  
57  
58  
59  
60

1  
2  
3 **Shortness of Breath with Daily Activities questionnaire: validation and**  
4 **responder thresholds in patients with chronic obstructive pulmonary disease**  
5  
6  
7

8 **Michael L Watkins,<sup>1</sup> Teresa K Wilcox,<sup>2</sup> Maggie Tabberer,<sup>3</sup> Jean M Brooks,<sup>3</sup>**  
9  
10 **James F Donohue,<sup>4</sup> Antonio Anzueto,<sup>5</sup> Wen-Hung Chen,<sup>2</sup> Courtney Crim<sup>1</sup>**  
11  
12

13  
14 <sup>1</sup>Respiratory Medicines Development Center, GlaxoSmithKline, Research Triangle Park,  
15 North Carolina, USA  
16

17  
18 <sup>2</sup>Evidera (formerly United BioSource Corporation), Bethesda, Maryland, USA  
19

20  
21 <sup>3</sup>Respiratory Medicines Development Centre, GlaxoSmithKline, Uxbridge, UK  
22

23  
24 <sup>4</sup>Division of Pulmonary and Critical Care Medicine, University of North Carolina, Chapel Hill,  
25 North Carolina, USA  
26

27  
28 <sup>5</sup>South Texas Veterans Health Care System and University of Texas Health Science Center,  
29 San Antonio, Texas, USA  
30

31 **Word counts etc**

32  
33 Total: 4115 words (4000 recommended)  
34

35 Abstract: 298 words (300 permitted)  
36

37 Figure/tables: 1 figure, 3 tables (max of 5 recommended)  
38  
39

40 **Running header:** Validation of SOBDA questionnaire  
41  
42

43 **Correspondence to:**

44  
45 Michael Watkins, Respiratory Medicines Development Center, GlaxoSmithKline, Research  
46 Triangle Park, NC 27613, United States. E-mail: [michael.l.watkins@gsk.com](mailto:michael.l.watkins@gsk.com).  
47

48  
49 Tel. +1 (919) 483-0449. Fax. +1 (919) 483-4300  
50  
51

52  
53 **Running title:** Validation of SOBDA Questionnaire  
54

55 **Key words:** dyspnoea, breathlessness, patient-reported outcomes, COPD  
56  
57  
58  
59  
60

## ABSTRACT

**Objectives:** To test the reliability, validity and responsiveness of the 13-item Shortness of Breath with Daily Activities (SOBDA) questionnaire, and determine the threshold for response and minimal important difference (MID).

**Design:** Six-week, randomised, double-blind, placebo-controlled study.

**Setting:** Forty centres in the United States between 29 Oct 2009 and 1 July 2010.

**Primary and secondary outcome measures:** 547 patients with chronic obstructive pulmonary disease (COPD) were enrolled and 418 entered the 2-week run-in period. Data from the run-in period were collected to test internal consistency, test-retest reliability, convergent validity, and known-groups validity of the SOBDA. 366 patients were randomised 2:2:1 to fluticasone propionate/salmeterol 250/50 µg, salmeterol 50 µg, or placebo, twice daily. Results from the SOBDA questionnaire, Patient Global Assessment of Change Question, modified Medical Research Council Dyspnoea Scale (mMRC), Clinician Global Impression of Dyspnoea Severity (CGI-S), Clinician Global Impression of Change Question, and Chronic Respiratory Disease Questionnaire self-administered standardised version (CRQ-SAS) were evaluated; spirometry and safety parameters were measured. Study endpoints were selected to investigate cross-sectional and longitudinal validity of the SOBDA in relation to clinical criteria.

**Results:** Internal consistency of the SOBDA questionnaire (Cronbach alpha) was 0.89. Test-retest reliability (intraclass correlation) was 0.94. SOBDA weekly scores correlated with patient-reported and clinician-reported mMRC, CGI-S, and CRQ-SAS dyspnoea domain scores (0.29, 0.24, 0.24, -0.68, respectively). SOBDA weekly scores differentiated responders and non-responders as rated by patients and clinicians. Anchor- and supportive distribution-based analyses produced a range of potential values for the threshold for responders and MID.



1  
2  
3 **Conclusions:** The 13-item SOBDA questionnaire is reliable, valid, and responsive to  
4 change in patients with COPD. Using anchor-based methods, the proposed responder  
5 threshold is a –0.1 to –0.2 score change. A specific threshold value will be identified as more  
6 data are generated from future clinical trials.  
7  
8  
9

10  
11 **Trial registration:** NCT00984659; **GlaxoSmithKline study number:** ASQ112989  
12  
13

14  
15 **Word count of the abstract:** 298  
16  
17  
18  
19  
20  
21  
22  
23  
24  
25  
26  
27  
28  
29  
30  
31  
32  
33  
34  
35  
36  
37  
38  
39  
40  
41  
42  
43  
44  
45  
46  
47  
48  
49  
50  
51  
52  
53  
54  
55  
56  
57  
58  
59  
60

## ARTICLE SUMMARY

### Article focus

- Dyspnoea, often referred to as 'shortness of breath' or 'breathlessness', is commonly associated with decreases in functional status, quality of life, and other disabilities.
- The patient-reported outcome questionnaire was developed to specifically assess Shortness of Breath with Daily Activities (SOBDA) in patients with chronic obstructive pulmonary disease (COPD).
- An initial non-interventional study (A2-4398-003)<sup>1</sup> showed internal consistency and test-retest reliability. The current study (NCT00984659; ASQ112989) was conducted to reconfirm the reliability, validity, and responsiveness of the 13-item SOBDA questionnaire and to determine the threshold for response and the minimal important difference of the final questionnaire.

### Key messages

- The current study demonstrates that the 13-item SOBDA questionnaire is reliable, valid, and responsive to change in patients with COPD. The proposed responder threshold is a -0.1 to -0.2 score change with a specific threshold value to be determined as more data are generated from future clinical trials.

### Strengths and limitations of the study

- This study reconfirmed the initial psychometric validation observed in the non-interventional study (A2-4398-003).<sup>1</sup>
- Only patients with modified Medical Research Council Dyspnoea Scale  $\geq 2$  were included in the patient population, thereby restricting the shortness of breath severity range. Approximately half of the patients also did not answer the last Patient Global

1  
2  
3 Assessment of Change question. These limitations may have affected some of the  
4  
5 validity assessments.  
6  
7  
8  
9  
10  
11  
12  
13  
14  
15  
16  
17  
18  
19  
20  
21  
22  
23  
24  
25  
26  
27  
28  
29  
30  
31  
32  
33  
34  
35  
36  
37  
38  
39  
40  
41  
42  
43  
44  
45  
46  
47  
48  
49  
50  
51  
52  
53  
54  
55  
56  
57  
58  
59  
60

For peer review only

## INTRODUCTION

Dyspnoea, sometimes referred to as 'shortness of breath' or 'breathlessness' by the patient, is a common and significant complaint of patients with chronic obstructive pulmonary disease (COPD). In one survey of 3,000 COPD patients, 56% were found to have breathlessness during normal physical activities and 42% reported breathlessness while doing household chores.<sup>2</sup>

Capturing the effect of a treatment intervention on dyspnoea from the patient's perspective is therefore an important objective in order to demonstrate treatment effectiveness. While patient-reported aspects of COPD have been assessed using currently available instruments, most do not adequately address the concept of dyspnoea in patients with COPD for use in clinical trials, due to limited assessment of psychometric properties during development of the questionnaire or inconsistent clinical validity in use. In addition, there are no currently available instruments for assessing COPD-related dyspnoea that can support a specific label claim for a medicinal product in the United States.

The Shortness of Breath with Daily Activities (SOBDA) questionnaire is a daily diary questionnaire developed to quantify a patient's perception of dyspnoea related to daily activities and how this changes over time during treatment.<sup>1,3</sup> Development of the SOBDA questionnaire followed the Patient-Reported Outcomes Guidance for drug development issued by the US Food and Drug Administration<sup>4</sup> and included the creation of an endpoint rationale and the development of a conceptual framework.<sup>3</sup> Qualitative research, including individual interviews and patient focus groups, was used to develop potential questions (item pool), item format and response options, which were subject to clinical and translation expert review. Further cognitive interviews with patients were conducted to test content validity.<sup>3</sup> The item pool was tested in a non-interventional study, and the number of items was appropriately reduced to produce the final SOBDA questionnaire.<sup>1</sup> Initial psychometric

1  
2  
3 validation from this non-interventional study showed excellent internal consistency and test-  
4  
5 retest reliability.<sup>1</sup>  
6  
7

8 The objectives of this study were to (i) confirm the reliability and validity, (ii) evaluate the  
9  
10 responsiveness, (iii) define the threshold for responder and also the minimal important  
11  
12 difference (MID) of the final SOBDA questionnaire in patients with COPD. The threshold for  
13  
14 response was established by comparing SOBDA change scores for responders and non-  
15  
16 responders, defined according to a range of established patient- and clinician-completed  
17  
18 assessments. The study included active treatments to ensure some patients would be  
19  
20 classified as 'responders' on the established clinical measures.  
21  
22

## 23 **METHODS**

### 24 **Patients**

25  
26  
27 Male and female patients  $\geq 40$  years of age with an established clinical history of COPD in  
28  
29 accordance with the American Thoracic Society/European Respiratory Society definitions<sup>5</sup>  
30  
31 were recruited. At screening, patients were required to have a post-salbutamol forced  
32  
33 expiratory volume in one second ( $FEV_{1}$ )  $\leq 70\%$  of predicted normal and  $FEV_{1}$  /forced vital  
34  
35 capacity (FVC) ratio of  $< 0.70$ ; to be a current or former smoker with a history of at least 10  
36  
37 pack-years; and to demonstrate evidence of dyspnoea as assessed by a patient-reported  
38  
39 modified Medical Research Council Dyspnoea Scale (mMRC) score  $\geq 2$ . The study protocol  
40  
41 was institutional review board-approved and all patients provided written informed consent  
42  
43 before enrolment.  
44  
45  
46  
47  
48

### 49 **Study design**

50  
51  
52 This randomised, double-blind, placebo-controlled study was conducted at 40 centres in the  
53  
54 USA from 29 Oct 2009 to 01 July 2010 (Trial registration: NCT00984659; GlaxoSmithKline  
55  
56 study number: ASQ112989). Patients attended three clinic visits. At screening visit 1, eligible  
57  
58  
59  
60

1  
2  
3 patients entered a 2-week run-in period during which short-acting bronchodilator rescue  
4 medications (salbutamol and/or ipratropium) were permitted. At visit 2, eligible patients were  
5 randomised (2:2:1) to receive fluticasone propionate/salmeterol combination (FSC)  
6  
7 250/50 µg, salmeterol (SAL) 50 µg or placebo, all administered twice daily via a DISKUS®  
8  
9 inhaler, for 6 weeks. The FSC and SAL active treatments were included to potentially induce  
10  
11 a change in the degree of the patients' symptoms of dyspnoea, which would allow the  
12  
13 responsiveness of the SOBDA questionnaire to be assessed. The final dose of study  
14  
15 medication was taken on the day before visit 3 (week 6). In the event of a patient not  
16  
17 completing the week 6 visit, attempts were made for the patient to attend an early withdrawal  
18  
19 visit that included the week 6 assessments.  
20  
21  
22

23  
24 All non-COPD medications, including pre-existing selective beta-blocker therapy, could be  
25  
26 continued if their dose remained constant. Concurrent use of inhaled or oral corticosteroids,  
27  
28 long-term oxygen therapy, long-acting bronchodilators, and theophylline were exclusion  
29  
30 criteria within the study protocol.  
31  
32

### 33 **Measurements and assessments**

34  
35  
36 Patient-completed measures: SOBDA questionnaire

37  
38  
39 The 13-item SOBDA questionnaire (box 1) was completed on an electronic diary (e-diary)  
40  
41 each evening immediately before bedtime, which allowed the patient to reflect on and  
42  
43 capture the current day's activities.<sup>13</sup> All items followed the same format: 'How breathless  
44  
45 were you when [completing the specified activity]?' Individual item responses are completed  
46  
47 on a scale from 'not at all' to 'so short of breath I did not do the activity'. Items 1–4, 6, 8, 9,  
48  
49 11, and 12 are scored from 1 ('not at all'), 2 ('slightly'), 3 ('moderately'), to 4 ('severely' or 'so  
50  
51 severely that I did not do the activity today'), and items 5, 7, 10, and 13 are scored from 1  
52  
53 ('not at all' and 'slightly'), 3 ('moderately'), and 4 ('severely' or 'so severely that I did not do  
54  
55 the activity today'). Patients were also given an option of 'did not do' for activities they did not  
56  
57 perform for other reasons. In scoring the questionnaire, these responses were regarded as  
58  
59  
60

1  
2  
3 missing data. Due to the design of the e-diary, it was not possible for patients to skip  
4 individual questions within the diary although a full day of data could be missed if the patient  
5 did not access the diary within the time window allowed.  
6  
7

8  
9  
10 Analyses were conducted aggregating daily data over weekly time periods to account for  
11 day-to-day variability and the fact that not all activities were performed every day. A daily  
12 SOBDA score was computed across the 13 items as a mean score ranging from 1 to 4, if at  
13 least 7 items had non-missing scores. A weekly mean SOBDA score was then computed as  
14 the mean of the daily mean scores in a 7-day period, if at least 4 out of 7 days had non-  
15 missing SOBDA daily scores. The baseline SOBDA weekly score for each patient was  
16 calculated as the mean value during the week before randomisation.  
17  
18  
19  
20  
21  
22  
23

#### 24 Patient-completed measures: other

25  
26  
27  
28 Additional questions were completed via e-diary, daily or weekly. Daily questions included  
29 any form of contact with healthcare professionals, frequency of rescue medication use, and  
30 completion of a Global Assessment of Shortness of Breath question: 'Overall, were you short  
31 of breath during your activities today?' Patients responded to this question on a 5-point scale  
32 from '1=not at all' to '5=extremely'. Every 7 days, patients responded to a Patient Global  
33 Assessment of Change (PGAC) question that asked, 'Compared to last week (7 days ago),  
34 how was your shortness of breath today?' on a scale of '1=much worse' to '5=much better',  
35 with 3='no change'.  
36  
37  
38  
39  
40  
41  
42  
43  
44

45 Patients completed the mMRC at each clinic visit and the 20-item Chronic Respiratory  
46 Disease Questionnaire self-administered standardised version (CRQ-SAS) at visit 2 and  
47 week 6/early withdrawal.  
48  
49  
50

#### 51 Clinician-completed assessments

52  
53  
54  
55 A Clinician Global Impression of Dyspnoea Severity (CGI-S) question to assess dyspnoea  
56 severity on a scale of 1 (mild) to 4 (very severe) was completed at visit 2 and week 6/early  
57  
58  
59  
60

1  
2  
3 withdrawal. A Clinician Global Impression of Change (CGI-C) question to assess change in  
4 dyspnoea on a scale of 1 (much worse) to 5 (much better), with 3 being no change, was  
5 completed at week 6/early withdrawal. Clinicians rated the patient's dyspnoea on the 5-point  
6 mMRC scale at each clinic visit.  
7  
8  
9

## 10 Spirometry

11  
12 Spirometry (FEV<sub>1</sub> and FVC) was performed at all clinic visits after the questionnaires were  
13 completed. FEV<sub>1</sub> responders were defined as patients who had a change of ≥100 ml from  
14 visit 2 to week 6/early withdrawal, whereas FEV<sub>1</sub> non-responders were those patients with a  
15 change of <100 ml. Bronchodilator reversibility testing was also performed 30 min post-  
16 salbutamol (360 µg) at screening. Predicted FEV<sub>1</sub> values were calculated according to  
17 National Health and Nutrition Examination Survey III reference values.<sup>6</sup>  
18  
19  
20  
21  
22  
23  
24  
25  
26  
27

## 28 Safety

29 Safety was assessed by reported adverse events (AEs) and COPD exacerbations.  
30  
31  
32  
33

## 34 Statistical analyses

### 35 Sample size and powering

36  
37 Sample size calculations were based on evaluation of the responsiveness of the SOBDA  
38 questionnaire<sup>1,3</sup> and allowed for comparison of SOBDA change scores for responders and  
39 non-responders. Calculations assumed 90% power, a two-sided 5% significance level, and a  
40 standardised between-groups effect size of 0.5 (defined as the difference between  
41 responders and non-responders divided by the standard deviation of the difference). The  
42 sample size was increased to allow exploratory comparisons of SOBDA scores between  
43 treatment arms. Assuming 90% of randomised patients would provide sufficient data for this  
44 comparison and a randomisation ratio of 2:2:1, approximately 350 patients were planned for  
45 randomisation in order to provide 320 evaluable patients.  
46  
47  
48  
49  
50  
51  
52  
53  
54  
55  
56  
57  
58  
59  
60



1  
2  
3 Analyses for the internal consistency, test-retest reliability in a stable population, convergent  
4 validity, and known-groups validity were based upon the data collected from the run-in  
5 population. This population consisted of randomised and non-randomised patients who  
6 completed visit 2. The responsiveness to change of the SOBDA was based on data  
7 collected from the modified intent-to-treat (mITT) population, defined as all patients who  
8 were randomised to treatment and who received at least one dose of study drug, and  
9 analyzed according to the treatment actually received if this was different from the  
10 randomised treatment assignment.  
11  
12  
13  
14  
15  
16  
17  
18  
19

### 20 Internal consistency

21  
22  
23 To confirm the reliability and validity of the SOBDA questionnaire,<sup>1</sup> the internal consistency  
24 of the instrument was assessed and summary scores were compared with other endpoints  
25 collected.  
26  
27  
28  
29

30 The internal consistency of the SOBDA score was assessed for patients with a non-missing  
31 score for each item at day 1 of the run-in period by using Cronbach's formula for coefficient  
32 alpha (scale from 0 to 1.0); a value of 0.70 or greater is recognised as indicating acceptable  
33 internal consistency for an instrument.<sup>7</sup> Pearson's correlation and Intraclass correlation  
34 coefficient (ICC) were used to evaluate test-retest reliability, comparing SOBDA weekly  
35 scores for patients who reported no change on their weekly PGAC assessment during  
36 weeks 1 and 2 of the run-in period.  
37  
38  
39  
40  
41  
42  
43  
44

### 45 Convergent and known-groups validity

46  
47  
48 SOBDA weekly scores were compared with other relevant study measures to establish the  
49 convergent and known-groups validity of the instrument. Convergent validity was assessed  
50 by examining the Spearman rank order correlation coefficient between baseline SOBDA  
51 weekly score and both mMRC (patient and clinician) ratings and CGI-S ratings at visit 2. The  
52 Pearson's correlation coefficient between the baseline SOBDA weekly scores and the  
53  
54  
55  
56  
57  
58  
59  
60

1  
2  
3 CRQ-SAS dyspnoea domain score at visit 2 were also assessed. Known-groups validity,  
4 demonstrating that groups of patients who are known to be different report different SOBDA  
5 scores, was assessed by comparisons of SOBDA weekly scores between groups of patients  
6 based on mMRC (patient and clinician) ratings and CGI-S ratings collected at visit 2 using  
7 analysis of covariance (ANCOVA) models adjusted for age, gender, and FEV<sub>1</sub> % predicted  
8 measured during the screening visit.  
9  
10  
11  
12  
13

## 14 Responsiveness

15  
16  
17  
18  
19 Responsiveness of the SOBDA questionnaire was assessed by comparing score changes  
20 between responders and non-responders on the PGAC, CGI-C, CRQ-SAS dyspnoea  
21 domain, and mMRC. Responders by PGAC and CGI-C were defined as patients with a  
22 rating of 'better' or 'much better', and non-responders were defined as patients with a  
23 response of 'much worse,' 'worse' or 'no change', on their respective scales. A CRQ-SAS  
24 dyspnoea domain responder was defined as a patient with a score increase of 0.5 units or  
25 more between visit 2 and week 6/early withdrawal, and a non-responder was defined as a  
26 patient who had a decrease in score, or an increase of less than 0.5 units. A responder by  
27 mMRC was defined as a patient who had a score decrease of 1 unit or more between visit 2  
28 and week 6/early withdrawal, and a non-responder was defined as a patient who had the  
29 same score or an increase in score.  
30  
31  
32  
33  
34  
35  
36  
37  
38  
39  
40  
41

42  
43 Changes from the previous week to the current week's SOBDA score during the six-week  
44 study treatment period were compared for responders and non-responders (defined  
45 according to the corresponding weekly PGAC assessment) using ANCOVA, adjusted for  
46 age, gender and baseline SOBDA weekly score. In addition, changes in mean SOBDA  
47 scores during the last week of treatment were compared for responders and non-responders  
48 based on the PGAC, CGI-C, CRQ-SAS dyspnoea domain, clinician-completed mMRC and  
49 patient-completed mMRC using ANCOVA adjusted for age, sex, and the baseline SOBDA  
50 weekly score.  
51  
52  
53  
54  
55  
56  
57  
58  
59  
60

## Defining the threshold for SOBDA responders and MID

A preliminary MID for SOBDA mean score change within a subject was also determined. This threshold for SOBDA response allowed comparison of proportions of responders in different intervention groups or treatment categories. Anchor-based methods using the PGAC, CGI-C, and CRQ-SAS dyspnoea domain scores were used to establish the threshold for SOBDA responders and the MID, by calculating SOBDA weekly change scores (for PGAC) and changes in SOBDA weekly scores from baseline to the last week of treatment (for PGAC, CGI-C, CRQ-SAS dyspnoea domain, and FEV<sub>1</sub>) in the response category or pre-specified grouping of 'better' for each anchor. Cumulative distribution plots based on these anchors were also used to determine the MID.

Post-hoc supportive analyses using distribution-based approaches were also conducted after completion of the *a priori* specified anchor-based analyses to further supplement estimation of a responder threshold. A method described by Revicki and associates<sup>8</sup> was used to estimate the response threshold by calculating 0.2 and 0.3 times the standard deviation of the SOBDA scores at baseline. In addition, thresholds were calculated by the standard error of measurements method.<sup>9</sup>

## RESULTS

A total of 547 patients were screened and 418 completed both week -2 (screening visit 1) and week 0 (randomisation, visit 2) assessments; 52 patients were not eligible for randomisation. 366 patients met inclusion criteria and were randomised; however, one patient refused to take study medication, thus 365 patients received treatment and were included in the mITT (figure 1). Patients were predominantly white (90%), male (57%) with a mean age of 61.1 years (standard deviation, 9.7 years) and a mean body mass index of 28.3 kg/m<sup>2</sup> (table 1). The majority (62%) of patients were current smokers with an extensive

1  
2  
3 smoking history (mean pack-years, 54.9). The mean post-salbutamol % predicted FEV<sub>1</sub> was  
4  
5 49.9%, indicative of a population with severe airflow obstruction.  
6

7  
8 A total of 29 patients withdrew from the study (FSC 9%; SAL 7%; placebo 8%), 13 because  
9  
10 of an AE (FSC 5%; SAL 2%; placebo 4%).  
11

## 12 **Reliability and validity**

### 13 Internal consistency

14  
15  
16 Cronbach's alpha value for the SOBDA was 0.89 (n=344). Test-retest reliability was  
17  
18 assessed between weeks 1 and 2 of the run-in period for the 152 patients reporting no  
19  
20 change on the second weekly PGAC assessment: Pearson's correlation coefficients and  
21  
22 ICC were both 0.94, with a mean difference between weeks 1 and 2 of 0.01 on the 4-point  
23  
24 SOBDA scale.  
25  
26  
27  
28

### 29 Convergent validity

30  
31  
32 The relationship of SOBDA weekly scores to patient-reported and clinical assessments of  
33  
34 dyspnoea severity or constructs hypothetically related to dyspnoea severity was examined to  
35  
36 assess convergent validity. Spearman rank-order correlations between baseline SOBDA  
37  
38 weekly scores and mMRC scores were 0.29 (patient-reported) and 0.24 (clinician-reported),  
39  
40 and was 0.24 for CGI-S. Pearson's correlation between baseline SOBDA weekly scores and  
41  
42 the CRQ-SAS dyspnoea domain score was -0.68 (higher scores in CRQ-SAS, contrary to  
43  
44 SOBDA, indicate less dyspnoea, hence the correlation is negative).  
45  
46  
47  
48

### 49 Known-groups validity

50  
51  
52 Known-groups validity was evaluated by determining the extent to which baseline SOBDA  
53  
54 weekly scores differentiated between patients with varying levels of dyspnoea severity as  
55  
56 rated on the patient- and clinician-reported mMRC and CGI-S collected at visit 2. Least-  
57  
58  
59  
60

1  
2  
3 squares mean SOBDA weekly scores were increased as CGI-S and mMRC clinician/patient  
4 ratings increased (table 2).  
5  
6

## 7 8 **Responsiveness**

9  
10  
11 SOBDA weekly scores were lower in PGAC responders than in non-responders, indicating  
12 less dyspnoea with daily activities. Differences between SOBDA weekly change scores for  
13 PGAC responders and non-responders were statistically significant for each weekly  
14 comparison with the exception of week 6 (table 3a).  
15  
16  
17  
18

19  
20 Changes in SOBDA weekly score between baseline and the last treatment week were  
21 statistically significantly larger for CGI-C and CRQ-SAS dyspnoea domain responders than  
22 for non-responders ( $p < 0.001$ ). This was not seen with the patient- or clinician-completed  
23 mMRC or PGAC defined responders, although changes in last treatment week SOBDA  
24 scores were numerically larger for responders versus non-responders (table 3b).  
25  
26  
27  
28  
29

## 30 31 **Threshold for SOBDA responders and MID**

32  
33  
34 Patients classified as 'better' based on the CGI-C, CRQ-SAS dyspnoea domain (change of  
35  $>0$  to 0.5 units), or FEV<sub>1</sub> (change of  $>50$  to  $<100$  ml) had a mean change in SOBDA score of  
36  $-0.25$ ,  $-0.13$ , or  $-0.16$ , respectively, at the last treatment week compared with baseline.  
37  
38  
39

40 Patients who rated their dyspnoea as 'better' on the PGAC assessments had a mean  
41 change in SOBDA score of  $-0.26$  at week 1,  $-0.08$  at weeks 2, 3 and 5,  $-0.10$  at week 4,  
42 and  $-0.05$  at week 6.  
43  
44  
45

46  
47 Using the method described by Revicki and associates,<sup>8</sup> thresholds of  $-0.14$  and  $-0.21$  were  
48 calculated using 0.2 and 0.3 times the standard deviation of the SOBDA scores at baseline.  
49  
50

51 In addition, a similar threshold of  $-0.17$  was identified by the standard error of  
52 measurements method.<sup>9</sup>  
53  
54  
55  
56  
57  
58  
59  
60

## Exploratory efficacy analyses

### SOBDA treatment group differences

After adjusting for age, sex, and SOBDA baseline score, the difference between FSC and placebo was  $-0.09$  (95% confidence interval [CI]:  $-0.23, 0.05$ ) and between SAL and placebo was  $0.03$  (95% CI:  $-0.11, 0.16$ ).

### CRQ-SAS

The greatest mean changes for dyspnoea and fatigue were observed in the FSC group (0.4 and 0.3, respectively). The mean changes from baseline in emotional function were similar between placebo and the two treatment groups (0.2 and 0.1), as were those for mastery (0.2 for placebo, 0.3 for SAL, and 0.4 for FSC). SAL and FSC groups reported a change of 'better' or 'much better' (56% and 65%, respectively) compared with the placebo group (53%). Thirty-four percent of patients receiving placebo were rated as responders, whereas 37% of SAL patients and 46% of FSC patients were responders using this measure.

### Spirometry

The mean change in FEV<sub>1</sub> in the placebo, SAL, and FSC groups were 1 ml, 61 ml, and 138 ml, respectively. Forty-nine percent of patients receiving FSC were considered responders, while 38% of patients receiving SAL and 25% of patients receiving placebo were responders. The majority of patients in the FSC (62%) and SAL (55%) groups reported a change of 'better' or 'much better', and less than half of patients in the placebo group (38%) reported this change.

### Safety

AEs were reported for 37 patients (27%) in the FSC group, 34 patients (23%) in the SAL group, and 14 patients (19%) in the placebo group. COPD exacerbation, dyspnoea,

1  
2  
3 headache, and respiratory tract infection were the most commonly reported AEs with no  
4  
5 other individual AEs occurring in  $\geq 3\%$  of patients in any group.  
6

7  
8 Twelve patients experienced serious AEs (SAEs) (FSC, 3 [2%] patients; SAL, 5 [3%]  
9  
10 patients; placebo, 4 [5%] patients); three of these SAEs were considered possibly related to  
11  
12 study medication (SAL, 1 patient; placebo, 2 patients). One fatal SAE of respiratory failure  
13  
14 occurred for a patient receiving FSC during the study, but was not considered related to FSC  
15  
16 treatment by the study investigator.  
17

## 18 19 **DISCUSSION**

20  
21  
22 The SOBDA was developed to address the need for a robust and psychometrically sound  
23  
24 patient-reported outcomes questionnaire for use in clinical research that would specifically  
25  
26 capture dyspnoea experienced with daily activities as perceived by patients with COPD.  
27  
28 Available questionnaires have limited assessment of psychometric properties, inconsistent  
29  
30 clinical validity, and/or are not dyspnoea-specific. The CRQ-SAS<sup>10-12</sup> and SGRQ<sup>13 14</sup>  
31  
32 questionnaires, for example, measure multiple dimensions that are much broader than  
33  
34 dyspnoea with activity, which is the specific aim of the current SOBDA questionnaire. The  
35  
36 mMRC questionnaire has been used to discriminate between levels of dyspnoea associated  
37  
38 with exercise, but shows very limited response to change in clinical trials due to the limited  
39  
40 number of categories for response.  
41  
42

43  
44 This study confirms that the SOBDA questionnaire has sound psychometric properties.  
45  
46 SOBDA weekly scores had an internal consistency reliability Cronbach's alpha value of 0.89,  
47  
48 which surpassed the established threshold goal of  $>0.7$ .<sup>7</sup> SOBDA also had good test-retest  
49  
50 reliability (ICC=0.94), exceeding the threshold goal of  $>0.60$ , in patients reporting no change  
51  
52 in their breathlessness as measured by the PGAC.<sup>15</sup>  
53  
54

55  
56 The convergent validity assessed through Spearman rank order correlations was  
57  
58 reasonable, although lower than expected for the CGI-C and mMRC. This may have been  
59  
60

1  
2  
3 due to the narrow range of responses given by clinicians: most patients were rated as '2' or  
4 '3' by clinicians on both scales. The narrow range of clinician mMRC ratings reflect the  
5 inclusion criteria requiring patients to have an mMRC  $\geq 2$  at study entry. The CRQ-SAS  
6 dyspnoea scale, which measures the concept most similar to the SOBDA, showed the  
7 highest correlation with the SOBDA questionnaire and is supportive of the SOBDA's  
8 construct validity.  
9

10  
11 SOBDA weekly scores in the study population demonstrated good known-groups validity  
12 through a series of analyses. The scores differentiated between dyspnoea severity as rated  
13 by both clinicians and patients. As expected, discrimination based on patient ratings was  
14 better than that based on clinician ratings. Known-groups validity was also confirmed when  
15 comparing the SOBDA with the CGI-S.  
16

17  
18 Assessment of responsiveness of the SOBDA questionnaire was conducted independent of  
19 treatment allocation. Good separation in SOBDA weekly scores was observed between the  
20 PGAC groups at day 8 as indicated by significant differences between scores for responders  
21 and non-responders. Less separation was observed between PGAC groups throughout the  
22 later weeks of the 6-week treatment period compared with week 1. This diminished  
23 separation may be partially explained by the way the PGAC score was derived, i.e., each  
24 week's PGAC score was based on scores from the previous week. This is also not an  
25 unexpected trend as any improvement in dyspnoea would be expected to occur or be  
26 perceptible to patients soon after initiating therapy, with continued improvement being less  
27 noticeable over time. The particularly diminished responsiveness observed at week 6 was  
28 potentially due to approximately half of the patients not providing a response to the PGAC at  
29 day 43 or at the last visit. Changes from baseline in SOBDA last treatment week scores  
30 were statistically significant between responders and non-responders using the CGI-C and  
31 CRQ-SAS dyspnoea domain, but not the mMRC. This again may be due to the narrow range  
32 of mMRC ratings.  
33  
34  
35  
36  
37  
38  
39  
40  
41  
42  
43  
44  
45  
46  
47  
48  
49  
50  
51  
52  
53  
54  
55  
56  
57  
58  
59  
60



1  
2  
3 The thresholds for SOBDA responders and the MID were explored using anchor- and  
4 distribution-based methods. Anchor-based methods were used to establish a preliminary  
5 MID range for SOBDA mean score changes within a patient, which would also be  
6 considered as the threshold for SOBDA responders to allow comparison of proportions of  
7 responders in different categories (e.g. different interventions or treatments). The evaluation  
8 of data around the MID was based on the change from baseline in the SOBDA score for  
9 those patients who endorsed or had the clinician endorse for them (depending on the  
10 anchor), the response category 'better' for the global assessments or the pre-specified  
11 grouping of meaningful improvement on other measures (PGAC, CGI-C, CRQ-SAS, and  
12 FEV<sub>1</sub>). Based on these anchors, a preliminary response threshold for the SOBDA  
13 questionnaire is a -0.1 to -0.2 score change. This is further supported by distribution-based  
14 estimations of the MID using methods described by Revicki and Wyrwich.<sup>8,9</sup> Thus, a  
15 threshold of -0.1 to -0.2 for the score range of 1 to 4, supported by both anchor- and  
16 distribution-based methods, seems reasonable at this stage of questionnaire development.  
17 This MID estimation is also consistent in scale with that of the CRQ-SAS in which the MID is  
18 0.5 on a 7-point Likert scale.<sup>16</sup>

19  
20  
21 Exploratory analysis by treatment group suggested that the proportion of patients crossing  
22 the -0.1 and -0.2 thresholds was numerically greater for the SAL group compared with  
23 placebo, and numerically greater for the FSC group compared with the SAL group. As the  
24 study was designed only to validate the SOBDA, and cannot reliably demonstrate  
25 differences between treatment groups, these changes from baseline in SOBDA weekly score  
26 at last treatment can only be regarded as exploratory. Even after adjusting for age, gender,  
27 and baseline SOBDA weekly score, the mean change in score for each treatment group  
28 when compared with placebo did not meet the MID of -0.1 or -0.2.

29  
30  
31 This study had some limitations. Only patients with mMRC  $\geq 2$  were included in the study,  
32 which restricted the ranges of the dyspnoea severity. The effects of exacerbation and  
33 possible cultural differences on the study results were not evaluated. Finally, approximately

1  
2  
3 half of the patients did not answer the last PGAC question despite completing other final visit  
4 assessments. These limitations could have had effect on some of the results of our study,  
5  
6 although we do not feel that there would be any change to the overall conclusions.  
7  
8  
9

10 In summary, this study demonstrates that the 13-item SOBDA questionnaire is reliable, valid,  
11 and responsive to change in patients with COPD. At this stage of questionnaire  
12 development, a change score of  $-0.1$  to  $-0.2$  is the most appropriate estimation for  
13 determining a threshold for treatment response. A specific value will be identified as more  
14 data is generated from future clinical trials.  
15  
16  
17  
18  
19

## 20 21 **ACKNOWLEDGEMENTS**

22  
23 Editorial support in the form of copyediting, editorial suggestions to draft versions of this  
24 paper, assembling tables and figures, collating author comments, fact checking, referencing,  
25 and graphic services was provided by Tara N Miller, PhD (Lyndhurst, NJ, USA), David  
26 Cutler, PhD and Lisa Moore, PhD (Macclesfield, UK) at Gardiner-Caldwell Communications.  
27  
28 This support was funded by GlaxoSmithKline.  
29  
30  
31  
32  
33  
34

## 35 **CONTRIBUTORS**

36  
37 All authors contributed to drafting the article or revising it critically for important intellectual  
38 content, and all approved the final version to be published. MLW, TKW, MT, JMB and CC  
39 contributed to conception and design of the study, acquisition of data and analysis and  
40 interpretation of data. JFD, AA and W-HC contributed to acquisition of data and analysis and  
41 interpretation of data. MLW attests that the authors had access to all the study data, takes  
42 responsibility for the accuracy of the analysis, and had authority over manuscript preparation  
43 and the decision to submit the manuscript for publication.  
44  
45  
46  
47  
48  
49  
50  
51  
52  
53  
54  
55  
56  
57  
58  
59  
60

## COMPETING INTERESTS

**Michael L Watkins, Maggie Tabberer, Jean M Brooks, and Courtney Crim** are employees of, and own stock in, GlaxoSmithKline. **Teresa K Wilcox** and **Wen-Hung Chen** are employees of the Evidera (formerly United BioSource Corporation). Funding to conduct the study, data analysis and interpretation, and generation of the study report was provided to Evidera by GlaxoSmithKline. **James F Donohue** has served as consultant to Almirall, AstraZeneca, Boehringer Ingelheim, Dey, Elevation Pharmaceuticals, Forest Laboratories, GlaxoSmithKline, Novartis, Pearl Pharmaceuticals, Pfizer and Sunovion; and has received research grants from Boehringer Ingelheim, GlaxoSmithKline and Novartis. **Antonio Anzueto** is an advisor, consultant, and speaker for Boehringer Ingelheim, GlaxoSmithKline, Pfizer, Merck, Bayer-Schering Pharma, Dey Pharma, Forest Laboratories and has investigational grants with the US National Heart, Lung, and Blood Institute, GlaxoSmithKline, Lilly, Pfizer, and Pneuma Pharmaceuticals.

## FUNDING

The SOBDA development programme, including this ASQ112989 study, was funded by GlaxoSmithKline. GlaxoSmithKline and Evidera (formerly United BioSource Corporation) developed the instrument. GlaxoSmithKline had a role in study design, data collection and analyses, decision to publish, and preparation of all study reporting including this manuscript.

## REFERENCES

1. Wilcox TK, Chen W-H, Howard KA, et al. Item selection, reliability and validity of the Shortness of Breath with Daily Activities (SOBDA) questionnaire: a new outcome measure for evaluating dyspnoea in COPD. (Submitted 2013).
2. Rennard S, Decramer M, Calverley PM, et al. Impact of COPD in North America and Europe in 2000: subjects' perspective of Confronting COPD International Survey. *Eur Respir J* 2002;**20**:799–805.
3. Howard K, Berry P, Petrillo J, et al. Development of the shortness of breath with daily activities questionnaire (SOBDA). *Value in Health* 2012;**15**:1042–50.
4. Food and Drug Administration. Guidance for industry on patient-reported outcome measures: use in medical product development to support labeling claims. 2009. <http://www.fda.gov/downloads/Drugs/Guidances/UCM193282.pdf> (accessed 4 Apr 2013).
5. Celli BR, MacNee W, ATS/ERS Task Force. Standards for the diagnosis and treatment of patients with COPD: a summary of the ATS/ERS position paper. *Eur Respir J* 2004;**23**:932–46.
6. Hankinson JL, Odencrantz JR, Fedan KB. Spirometric reference values from a sample of the general US population. *Am J Resp Crit Care Med* 1999;**159**:179–87.
7. Nunnally JC, Bernstein IH. *Psychometric Theory*. 3rd ed. New York: McGraw-Hill, Inc.; 1994.
8. Revicki DA, Cella D, Hays RD, et al. Responsiveness and minimal important differences for patient reported outcomes. *Health Qual Life Outcomes* 2006;**4**:70.
9. Wyrwich K, Tierney W, Wolinsky F. Further evidence supporting a SEM-based

- 1  
2  
3 criterion for identifying meaningful intra-individual changes in health-related quality of  
4 life. *J Clin Epidemiol* 1999;**52**:861–73.
- 5  
6  
7  
8 10. Aaron SD, Vandemheen KL, Clinch JJ, et al. Measurement of short-term changes in  
9 dyspnoea and disease-specific quality of life following an acute COPD exacerbation.  
10 *Chest* 2002;**121**:688–96.
- 11  
12  
13  
14  
15 11. Aaron SD, Vandemheen KL, Hebert P, et al. Outpatient oral prednisone after  
16 emergency treatment of chronic obstructive pulmonary disease. *N Engl J Med*  
17 2003;**348**:2618–25.
- 18  
19  
20  
21  
22 12. Parker CM, Voduc N, Aaron SD, et al. Physiological changes during symptom  
23 recovery from moderate exacerbations of COPD. *Eur Respir J* 2005;**26**:420–8.
- 24  
25  
26  
27 13. Jones PW, Quirk FH, Baveystock CM. The St George's Respiratory Questionnaire.  
28 *Respir Med* 1991;**85**(Suppl. B):2531.
- 29  
30  
31  
32 14. Jones PW, Quirk FH, Baveystock CM, et al. A self-complete measure of health status  
33 for chronic airflow limitation. The St George's Respiratory Questionnaire. *Ann Rev*  
34 *Respir Dis* 1992;**145**:1321–7.
- 35  
36  
37  
38  
39 15. Hays R, Anderson R, Revicki DA. Assessing reliability and validity of measurement in  
40 clinical trials. In: Staquet MJ, Hays RD, Fayers PM, eds. *Quality of life assessment in*  
41 *clinical trials*. New York, NY: Oxford University Press, 1998.167–182.
- 42  
43  
44  
45  
46 16. Schunemann HJ, Puhan M, Goldstein R, et al. Measurement properties and  
47 interpretability of the chronic respiratory disease questionnaire (CRQ). *COPD*  
48 2005;**2**:81–9.
- 49  
50  
51  
52  
53  
54  
55  
56  
57  
58  
59  
60

## TABLES AND FIGURES

Table 1. Demographic and clinical characteristics

|                                                            | Not Randomised | Placebo     | SC 250/50 µg | SAL 50 µg   | Total       |
|------------------------------------------------------------|----------------|-------------|--------------|-------------|-------------|
| N                                                          | 52             | 75          | 139          | 152         | 418         |
| Age, year (mean [SD])                                      | 63.8 (9.6)     | 62.8 (9.8)  | 60.2 (9.5)   | 60.1 (9.6)  | 61.1 (9.7)  |
| Male, n (%)                                                | 25 (48)        | 46 (61)     | 79 (57)      | 89 (59)     | 239 (57)    |
| White, n (%)                                               | 44 (85)        | 65 (87)     | 127 (91)     | 140 (92)    | 376 (90)    |
| Current smoker, n (%)                                      | 29 (57)        | 46 (61)     | 84 (60)      | 99 (65)     | 258 (62)    |
| Body mass index, mean (SD)                                 | 28.3 (6.9)     | 26.6 (6.1)  | 29.0 (7.3)   | 28.5 (6.2)  | 28.3 (6.7)  |
| Post-bronchodilator FEV <sub>1</sub> % predicted mean (SD) | 50.3 (15.1)    | 49.4 (13.1) | 49.5 (13.7)  | 50.2 (13.8) | 49.9 (13.8) |
| FEV <sub>1</sub> /FVC % (mean [SD])                        | 55.7 (35.2)    | 51.6 (11.4) | 53.7 (11.4)  | 52.2 (10.9) | 53.0 (16.1) |
| % Reversibility (mean [SD])                                | 8.6 (14.4)     | 16.7 (19.2) | 14.5 (18.5)  | 11.7 (13.9) | 13.1 (16.8) |

NOTE: 'Not randomised' column reflects those patients who completed visit 1 and 2 assessments but were not eligible to be randomised.

'Total' column reflects the run-in population, defined as patients who completed visits 1 and 2 including those who were not randomised.

FEV<sub>1</sub>, forced expiratory volume in 1 s; FSC, fluticasone propionate/salmeterol combination; FVC, forced vital capacity; SAL = salmeterol;

SD, standard deviation.

**Table 2.** Known groups validity: least-squares mean baseline SOBDA weekly score by mMRC and CGI-S response categories at visit 2

| Response categories | Patient-completed mMRC<br>n, LS mean SOBDA score (SE) | Clinician-completed mMRC<br>n, LS mean SOBDA score (SE) | CGI-S<br>n, LS mean SOBDA score (SE) |
|---------------------|-------------------------------------------------------|---------------------------------------------------------|--------------------------------------|
| 0                   | n=12<br>1.92 (0.19)                                   | --                                                      | --                                   |
| 0-1                 | --                                                    | n=12<br>1.78 (0.20)                                     | --                                   |
| 1                   | n=103<br>1.94 (0.07)                                  | --                                                      | n=19<br>1.87 (0.16)                  |
| 2                   | n=138<br>2.20 (0.06)                                  | n=200<br>2.08 (0.05)                                    | n=236<br>2.11 (0.05)                 |
| 3                   | n=65<br>2.26 (0.08)                                   | n=117<br>2.28 (0.06)                                    | n=78<br>2.33 (0.08)                  |
| 4                   | n=22<br>2.73 (0.14)                                   | n=10<br>2.73 (0.22)                                     | n=5<br>2.72 (0.31)                   |

NOTE: Due to the small number of 0 and 1 responses in the clinician-completed mMRC, these two categories were combined.

SOBDA, Shortness of Breath with Daily Activities; mMRC, modified Medical Research Council dyspnoea rating scale; CGI-S, Clinician Global Impression of Dyspnoea Severity; SE, standard error.

1  
2  
3  
4  
5  
6  
7  
8  
9  
10  
11  
12  
13  
14  
15  
16  
17  
18  
19  
20  
21  
22  
23  
24  
25  
26  
27  
28  
29  
30  
31  
32  
33  
34  
35  
36  
37  
38  
39  
40  
41  
42  
43  
44  
45  
46  
47  
48  
49

**Table 3** (A) Change in SOBDA weekly score by PGAC responders; (B) Change in SOBDA last treatment week score by assessment responders at visit 3

**A)**

|                                                            | <b>Day 8</b>      | <b>Day 15</b>     | <b>Day 22</b>     | <b>Day 29</b>     | <b>Day 36</b>     | <b>Day 43</b>      |
|------------------------------------------------------------|-------------------|-------------------|-------------------|-------------------|-------------------|--------------------|
| PGAC responders (n)                                        | 105               | 91                | 83                | 62                | 77                | 31                 |
| PGAC non-responders (n)                                    | 188               | 212               | 216               | 223               | 200               | 88                 |
| LS mean difference in SOBDA scores between groups (95% CI) | 0.24 (0.18, 0.31) | 0.12 (0.06, 0.19) | 0.11 (0.06, 0.16) | 0.11 (0.06, 0.17) | 0.13 (0.08, 0.18) | 0.06 (-0.03, 0.15) |
| p value*                                                   | <0.001            | <0.001            | <0.001            | <0.001            | <0.001            | NS                 |

\* Comparison of SOBDA scores (non-responders minus responders) based on analysis of covariance adjusted for age, gender and previous week's SOBDA score.

CI, confidence interval; LS, least squares; NS, not significant; PGAC, Patient Global Assessment of Change; SOBDA, Shortness of Breath with Daily Activities



B)

|                                                            | CGI-C                | CRQ-SAS<br>dyspnoea domain | Clinician-completed<br>mMRC | Patient-completed<br>mMRC | PGAC                  |
|------------------------------------------------------------|----------------------|----------------------------|-----------------------------|---------------------------|-----------------------|
| Responders (n)                                             | 120                  | 117                        | 91                          | 92                        | 45                    |
| Non-responders (n)                                         | 181                  | 184                        | 210                         | 209                       | 106                   |
| LS mean difference in SOBDA scores between groups (95% CI) | 0.24<br>(0.14, 0.34) | 0.30<br>(0.21, 0.40)       | 0.03<br>(-0.08, 0.15)       | 0.08<br>(-0.02, 0.19)     | 0.08<br>(-0.07, 0.23) |
| p value*                                                   | <0.001               | <0.001                     | NS                          | NS                        | NS                    |

\* Comparison of SOBDA scores (non-responders minus responders) based on Analysis of Covariance adjusted for age, gender and baseline SOBDA weekly score.

CGI-C, Clinician Global Impression of Change; CRQ-SAS, Chronic Respiratory Disease Questionnaire self-administered standardised version; CI, confidence interval; mMRC, modified Medical Research Council; LS, least squares; NS, not significant; PGAC, Patient Global Assessment of Change; SOBDA, Shortness of Breath with Daily Activities

1  
2  
3 **Box 1.** 13-Item SOBDA questionnaire  
4  
5  
6

7 **Figure 1.** Patient disposition  
8  
9

10 \*Patients who completed visits 1 and 2 including those not randomised.  
11

12 †Patients randomised to treatment and received at least one dose of the study drug. One additional  
13 patient was randomised but not treated.  
14

15 BID, twice daily; FSC, fluticasone propionate/salmeterol combination; mITT, modified intent-to-treat;  
16 SAL, salmeterol.  
17  
18  
19  
20  
21  
22  
23  
24  
25  
26  
27  
28  
29  
30  
31  
32  
33  
34  
35  
36  
37  
38  
39  
40  
41  
42  
43  
44  
45  
46  
47  
48  
49  
50  
51  
52  
53  
54  
55  
56  
57  
58  
59  
60

1 Reviewer response document: SOBDA ASQ112989 paper  
2  
3

4 23 July 2013  
5  
6

7 Mr Richard Sands  
8

9 Managing Editor, BMJ Open  
10

11 Re: Submission MS: bmjopen-2013-003048  
12  
13

14  
15  
16  
17 Dear Mr Sands,  
18

19 Please find uploaded our revised version of this manuscript together with a detailed response to the points raised by the  
20 Editors and Reviewers. We have presented the responses to the comments in the form of a table highlighting the specific  
21 comments and have provided a detailed response with reference to the manuscript. We have included a clean version of  
22 our manuscript and a marked version where track changes have been used to show inserted and deleted text.  
23  
24

25 We have made amendments following the Editors' and Reviewers' requests and have also made minor, in-frequent  
26 editorial changes to further improve the clarity and flow of the manuscript.  
27  
28

29 Finally, we are very grateful for the suggestions provided by the Editors and Reviewers to improve our manuscript and we  
30 hope that we have been able to respond to them satisfactorily. We hope that you find the revised version of our paper  
31 improved and more acceptable to the Journal. Many thanks for your work on this paper to date and the interest that you  
32 have shown in it.  
33  
34

35  
36  
37 Yours sincerely,  
38

39 Dr Michael Watkins, on behalf of all authors  
40  
41  
42  
43  
44  
45  
46  
47  
48  
49

Reviewer response document: SOBDA ASQ112989 paper

**Associate and managing editors, BMJ Open**

|     |                                                                                                                                                                                                                                                                         |                                                                                                                                                                                                                                                                                                                                                                                                                                                                                                                                                                                                                                                                                                                                                                                                                                                                                                                                                                                                     |
|-----|-------------------------------------------------------------------------------------------------------------------------------------------------------------------------------------------------------------------------------------------------------------------------|-----------------------------------------------------------------------------------------------------------------------------------------------------------------------------------------------------------------------------------------------------------------------------------------------------------------------------------------------------------------------------------------------------------------------------------------------------------------------------------------------------------------------------------------------------------------------------------------------------------------------------------------------------------------------------------------------------------------------------------------------------------------------------------------------------------------------------------------------------------------------------------------------------------------------------------------------------------------------------------------------------|
| 1.1 | There are 20 primary outcomes registered on the trial registry for this study, which is many. Are they all addressed here?                                                                                                                                              | The primary outcomes listed on Clintrials.gov are all relevant to the evaluation of the reliability, responsiveness and validity of the SOBDA and are addressed in the manuscript.                                                                                                                                                                                                                                                                                                                                                                                                                                                                                                                                                                                                                                                                                                                                                                                                                  |
| 1.2 | Please clarify the context of this evaluation; presumably the results of the RCT will be reported somewhere (fluticasone propionate/salmeterol, salmeterol, or placebo). It would help clarify this evaluation of the SOBDA questionnaire if that was explained better. | <p>The study was designed to test the reliability, validity, and responsiveness of the SOBDA questionnaire in patients with COPD and to determine the threshold for response and the minimal important difference (MID) of the final questionnaire independent of treatment allocation. The treatments included in the protocol are designed to allow assessment of the responsiveness of the SOBDA instrument.</p> <p>To clarify this point we have added the following text to the Methods, “The FSC and SAL active treatments were included to potentially induce a change in the degree of the patients’ symptoms of dyspnoea, which would allow the responsiveness of the SOBDA questionnaire to be assessed.”</p> <p>The study was not powered to make treatment comparisons. Although comparisons are briefly presented in the manuscript, any observed differences between treatment arms can only be considered as exploratory; therefore, the results will not be reported elsewhere.</p> |

**Avinesh Pillai**

Reviewer response document: SOBDA ASQ112989 paper

|     |                                                                                                                                                                                                                                            |                                                                       |
|-----|--------------------------------------------------------------------------------------------------------------------------------------------------------------------------------------------------------------------------------------------|-----------------------------------------------------------------------|
| 2.1 | A well written paper which was easy to read and follow considering the breadth of analyses undertaken. It was reassuring to see that the all-important inclusion and exclusion criteria were defined as well as the sample size and power. | We thank you for reviewing our manuscript and for your kind comments. |
|-----|--------------------------------------------------------------------------------------------------------------------------------------------------------------------------------------------------------------------------------------------|-----------------------------------------------------------------------|

### Paul Jones

|     |                                                                                                                               |                                                                                                                                                                                                                                                                                                                                                                                                                                                                                                                                                                                                                                                                                                                                                                                                                                                                                                                                                                                                                                                                                                                                                                                                                                     |
|-----|-------------------------------------------------------------------------------------------------------------------------------|-------------------------------------------------------------------------------------------------------------------------------------------------------------------------------------------------------------------------------------------------------------------------------------------------------------------------------------------------------------------------------------------------------------------------------------------------------------------------------------------------------------------------------------------------------------------------------------------------------------------------------------------------------------------------------------------------------------------------------------------------------------------------------------------------------------------------------------------------------------------------------------------------------------------------------------------------------------------------------------------------------------------------------------------------------------------------------------------------------------------------------------------------------------------------------------------------------------------------------------|
| 3.1 | What was the primary purpose of the study – to test the SOBDA or to compare salmeterol with FSC? I suspect it was the latter. | <p>As stated in comment 1.2, the primary objective of the study was to test the reliability, validity, and responsiveness of the SOBDA questionnaire in patients with COPD and to determine the threshold for response and the MID of the final questionnaire independent of treatment allocation. The study was not designed or powered to reliably show differences between treatments. Although treatment comparisons are briefly presented in the manuscript, a priori any observed differences between treatment arms were considered exploratory.</p> <p>The study objectives are also stated in the Introduction – “The objectives of this study were to (i) confirm the reliability and validity, (ii) evaluate the responsiveness, (iii) define the threshold for responder and also the minimal important difference (MID) of the final SOBDA questionnaire in patients with COPD.”</p> <p>In addition, to further clarify, the following text has been added to the Methods of the manuscript, “The FSC and SAL active treatments were included to potentially induce a change in the degree of the patients’ symptoms of dyspnoea, which would allow the responsiveness of the SOBDA questionnaire to be assessed.”</p> |
|-----|-------------------------------------------------------------------------------------------------------------------------------|-------------------------------------------------------------------------------------------------------------------------------------------------------------------------------------------------------------------------------------------------------------------------------------------------------------------------------------------------------------------------------------------------------------------------------------------------------------------------------------------------------------------------------------------------------------------------------------------------------------------------------------------------------------------------------------------------------------------------------------------------------------------------------------------------------------------------------------------------------------------------------------------------------------------------------------------------------------------------------------------------------------------------------------------------------------------------------------------------------------------------------------------------------------------------------------------------------------------------------------|

Reviewer response document: SOBDA ASQ112989 paper

|     |                                                                                                                                                                                                                                                                                                                |                                                                                                                                                                                                                                                                                                                                                                                                                                                                                                                                                                                                                                                                                                                                                                                                                                                                                                                           |
|-----|----------------------------------------------------------------------------------------------------------------------------------------------------------------------------------------------------------------------------------------------------------------------------------------------------------------|---------------------------------------------------------------------------------------------------------------------------------------------------------------------------------------------------------------------------------------------------------------------------------------------------------------------------------------------------------------------------------------------------------------------------------------------------------------------------------------------------------------------------------------------------------------------------------------------------------------------------------------------------------------------------------------------------------------------------------------------------------------------------------------------------------------------------------------------------------------------------------------------------------------------------|
| 3.2 | <p>Why restrict the study population to patients with mMRC<math>\geq</math>2? This is a major weakness. I suspect that it was because the study's primary purpose was the FSC comparison. This restriction limited the generalisability of the findings and may also have had an impact on the validation.</p> | <p>The inclusion of mMRC <math>\geq</math> 2 in the study protocol is two-fold.</p> <p>Firstly, mMRC <math>\geq</math> 2 was used as an inclusion criterion to ensure that symptoms of dyspnoea were present in order to assess responsiveness at this stage of questionnaire development. No restriction on mMRC was used in the previous questionnaire development work, although the first validation study was also restricted to mMRC <math>\geq</math>2.</p> <p>Secondly and more generally, the population included in this study is similar to the patient population that would be included in a clinical trial program where the SOBDA would be used, and is also consistent with FDA requirements for a clinical trial for symptom relief.</p> <p>The limitation with mMRC <math>\geq</math> 2 criterion was acknowledged in the manuscript, however, the mMRC range expanded toward the end of the study.</p> |
| 3.3 | <p>How did the clinicians make their assessment of PGAC? Were standardised instructions given?</p>                                                                                                                                                                                                             | <p>PGAC is the 'Patient Global Assessment of Change' question that was completed on the electronic diary on a weekly basis. Every 7 days, patients responded to the PGAC question which asked, 'Compared last week (7 days ago), how was your shortness of breath today?' on a scale of 1=much worse to 5=much better, with 3 being no change.</p> <p>Clinicians completed the Clinician Global Impression of Severity (CGI-S) and Clinician Global Impression of Change (CGI-C). CGI-S was completed at Visit 2 and at end of study and the CGI-C was completed at the end of the study. Clinicians also completed mMRC at these same time points. Instructions on the completion of these measures were included in the study manual and in site</p>                                                                                                                                                                    |

Reviewer response document: SOBDA ASQ112989 paper

|     |                                                                                                                                                                                    |                                                                                                                                                                                                                                                                                                                                                                                                                                                                                                                                                                                                                                                                                                                                     |
|-----|------------------------------------------------------------------------------------------------------------------------------------------------------------------------------------|-------------------------------------------------------------------------------------------------------------------------------------------------------------------------------------------------------------------------------------------------------------------------------------------------------------------------------------------------------------------------------------------------------------------------------------------------------------------------------------------------------------------------------------------------------------------------------------------------------------------------------------------------------------------------------------------------------------------------------------|
|     |                                                                                                                                                                                    | training.                                                                                                                                                                                                                                                                                                                                                                                                                                                                                                                                                                                                                                                                                                                           |
| 3.4 | The distribution estimate of MCI should have been described in Methods and reported in Results.                                                                                    | <p>The following information in the Discussion section of the manuscript concerning the distribution-based approach and results was not part of the Reporting and Analysis Plan (RAP); however, we have moved these statements to the Methods section and included them in the paragraph discussing the 'post-hoc supportive analyses':</p> <ul style="list-style-type: none"> <li>– “Similar thresholds of <math>-0.14</math> and <math>-0.21</math> were calculated using 0.2 and 0.3 times the standard deviation of the SOBDA scores at baseline, a method described by Revicki and associates. In addition, a similar threshold of <math>-0.17</math> was identified by the standard error of measurements method.”</li> </ul> |
| 3.5 | Why use 1 grade on the mMRC as an anchor for the MID estimate? This scale is very coarse. Is 1 grade the MID for the mMRC?                                                         | <p>mMRC was used as an inclusion criterion, and the difference in SOBDA score between mMRC responders and non-responders was used to assess responsiveness.</p> <p>mMRC was not used as a primary anchor for determining the MID. The primary evaluation of data around the MID was based on the change from baseline in the SOBDA score for those patients who endorsed or had the clinician endorse for them (depending on the anchor) the response category or the pre-specified grouping of 'better' for PGAC, CGI-C, CRQ-SAS, and FEV<sub>1</sub>.</p>                                                                                                                                                                         |
| 3.6 | Why were so few data points available at Visit 6 – a key assessment point?                                                                                                         | About half of subjects did not complete the PGAC at Day 43 due to a logistical oversight; certain sites did not administer the PGAC as instructed on the electronic device at the final visit. All other data points and assessments at Day 43 were collected (see Table 3b).                                                                                                                                                                                                                                                                                                                                                                                                                                                       |
| 3.7 | Convergent validity - the correlations between SOBDA and mMRC and CGI are too low to permit a reliable estimate of MID. A flat relationship will give an apparently very high MID. | As described in the manuscript, this low correlation may have been due to the narrow range of responses given by clinicians: most patients were rated as '2' or '3' by clinicians on both scales due to the inclusion criterion requiring                                                                                                                                                                                                                                                                                                                                                                                                                                                                                           |

Reviewer response document: SOBDA ASQ112989 paper

|      |                                                                                                                                                                                                                                                                                                                                               |                                                                                                                                                                                                                                                                                                                                                                                                                                                                |
|------|-----------------------------------------------------------------------------------------------------------------------------------------------------------------------------------------------------------------------------------------------------------------------------------------------------------------------------------------------|----------------------------------------------------------------------------------------------------------------------------------------------------------------------------------------------------------------------------------------------------------------------------------------------------------------------------------------------------------------------------------------------------------------------------------------------------------------|
|      |                                                                                                                                                                                                                                                                                                                                               | patients to have an mMRC $\geq 2$ at study entry. mMRC responders were used to assess responsiveness, and not used to determine MID (please see comment 3.5). The CRQ-SAS dyspnoea scale, which measures the concept most similar to the SOBDA, showed the highest correlation with the SOBDA questionnaire and is supportive of the SOBDA's construct validity. CRQ-SAS was also used as an anchor in the determination of the MID.                           |
| 3.8  | A SOBDA score of 1 corresponds to mMRC of almost 2. This suggests that this instrument is only suitable for more severely limited patients. This point should be discussed.                                                                                                                                                                   | As noted in Table 2, the point estimate of SOBDA scores for the patient-completed mMRC of '1' is 1.94 (SE 0.07). The SOBDA score of '2' approximately represents a shortness of breath of 'slightly', and the mMRC scores of 0 or 1 represent breathlessness with only the more rigorous activities. The mean SOBDA score increases with increasing mMRC grade across the whole scale (Table 2), indicating SOBDA can discriminate between all mMRC grades.    |
| 3.9  | A plot of the relationship between CRQ and SOBDA should be shown, not just the correlation. Is there a significant intercept? I think there might be, especially if the SOBDA is insensitive at the mild end. If not, that would go some way to provide reassurance that the high mMRC in SOBDA 1 is more to do with the mMRC than the SOBDA. | <i>Please see the figure at the end of this response table.</i><br><br>This figure shows the relationship between CRQ-SAS and SOBDA and demonstrates a full range of scores. Please note that this figure includes patients with mMRC scores $\geq 2$ , as specified by the inclusion criterion.<br><br>We have included the figure for the purpose of the Reviewers, although we have not chosen or feel it's necessary to include it in the full manuscript. |
| 3.10 | What is the explanation for a significant difference between SOBDA scores in clinician measurements of change, but not patient estimate of change? Why did the patients get it wrong? It seems counter-intuitive.                                                                                                                             | Significant differences in SOBDA scores were observed with patient-rated measures, such as the PGAC (Patient Global Assessment of Change). Significant separation in SOBDA scores was seen between the PGAC groups at each measurement time point, excluding the Day 43 assessment. Changes in last treatment week SOBDA                                                                                                                                       |



Reviewer response document: SOBDA ASQ112989 paper

|      |                                                                                                                                                                                                                                      |                                                                                                                                                                                                                                                                                                                                                                                                                                                                                                                                                                                                                                                                                                                                                                                                                                                                                                                                                                                                                                                                            |
|------|--------------------------------------------------------------------------------------------------------------------------------------------------------------------------------------------------------------------------------------|----------------------------------------------------------------------------------------------------------------------------------------------------------------------------------------------------------------------------------------------------------------------------------------------------------------------------------------------------------------------------------------------------------------------------------------------------------------------------------------------------------------------------------------------------------------------------------------------------------------------------------------------------------------------------------------------------------------------------------------------------------------------------------------------------------------------------------------------------------------------------------------------------------------------------------------------------------------------------------------------------------------------------------------------------------------------------|
|      |                                                                                                                                                                                                                                      | <p>scores were also significant between responders defined using the CGI-C and the patient-rated CRQ-SAS dyspnoea domain, but not the mMRC (patient- or clinician-rated).</p>                                                                                                                                                                                                                                                                                                                                                                                                                                                                                                                                                                                                                                                                                                                                                                                                                                                                                              |
| 3.11 | <p>What is the rationale for including FEV<sub>1</sub> &gt;50 to &lt;100 as an anchor? It is not described in the methods and is highly risky, because I suspect that the correlation between SOBDA and FEV<sub>1</sub> is weak.</p> | <p>Level of response of FEV<sub>1</sub> was the change in FEV<sub>1</sub> categorized into a 3-point response scale with 'no change or worse' defined as a change of &lt;50mL, 'better' as a change of 50 to &lt;100mL and 'much better' as a change of 100mL or more. The determination of the responder threshold was based on the change from baseline in the SOBDA score for those subjects who endorsed or had the clinician endorse for them (depending on the anchor) the response category or the pre-specified grouping of 'better' for PGAC, CGI-C, CRQ-SAS, and FEV<sub>1</sub>. The defined ranges of FEV<sub>1</sub> were based on clinical opinion prior to unblinding of the study data, and it was believed at the time that improvements in FEV<sub>1</sub> with pharmacologic therapy may be reflected by improvements in the SOBDA.</p> <p>The assessment of SOBDA scores by FEV<sub>1</sub> categories was only one of several measures considered when determining the initial MID for the instrument. This data should not be interpreted alone.</p> |
| 3.12 | <p>The loss of discrimination over time is very worrying. It means that the SOBDA cannot be used over the length of most clinical studies. This merits more discussion.</p>                                                          | <p>Good separation in SOBDA scores was seen between the PGAC groups at Day 8. Less separation was observed between PGAC groups throughout the later weeks of the 6-week study period than during Week 1. However, this is not an unexpected trend as the greatest improvement in shortness of breath would be expected to occur shortly after initiating therapy; further improvement would then tend to level off over time. Each week's PGAC score is based on comparisons with the previous week, thus improvement becomes less evident in later weeks. The particularly diminished responsiveness observed at Day 43 was</p>                                                                                                                                                                                                                                                                                                                                                                                                                                           |

Reviewer response document: SOBDA ASQ112989 paper

1  
2  
3  
4  
5  
6  
7  
8  
9  
10  
11  
12  
13  
14  
15  
16  
17  
18  
19  
20  
21  
22  
23  
24  
25  
26  
27  
28  
29  
30  
31  
32  
33  
34  
35  
36  
37  
38  
39  
40  
41  
42  
43  
44  
45  
46  
47  
48  
49

|  |  |                                                                                                                                                                                                                                                |
|--|--|------------------------------------------------------------------------------------------------------------------------------------------------------------------------------------------------------------------------------------------------|
|  |  | <p>possibly due to the full sample not being administered (logistical oversight), as mentioned in comment 3.6.</p> <p>Future studies during the clinical development program will continue to evaluate the SOBDA over longer time periods.</p> |
|--|--|------------------------------------------------------------------------------------------------------------------------------------------------------------------------------------------------------------------------------------------------|

For peer review only

Reviewer response document: SOBDA ASQ112989 paper

Scatter plot of SOBDA Baseline Score vs CRQ-SAS Dyspnoea Domain Score at Visit 2

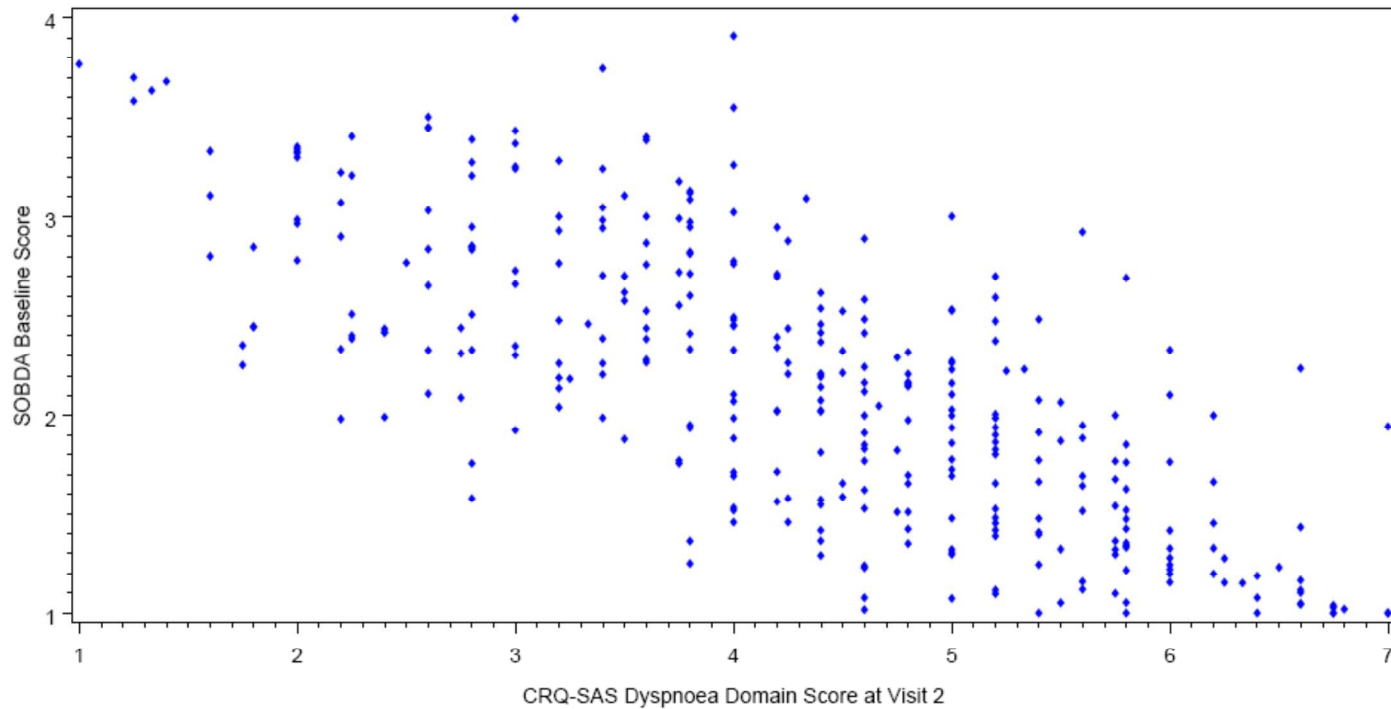

The CRQ-SAS dyspnoea domain score is the average of questions 1 - 'Feeling emotional, angry or upset'; 2 - 'Taking care of your basic needs'; 3 - 'Walking'; 4 - 'Performing household chores'; and 5 - 'Participate in social activities'. Responses to each question are coded as 1 = 'Extremely short of breath'; 2 = 'Very short of breath'; 3 = 'Quite a bit short of breath'; 4 = 'Moderate short of breath'; 5 = 'Some shortness of breath'; 6 = 'A little shortness of breath'; 7 = 'Not at all short of breath'.  
 sam31676: /arenv/arprod/cci18781\_gr33343/asq112989/final/drivers/sobda\_f004f.sas 12OCT2011 16:25

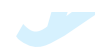
